# Supplementary material for: The domesticated transposon protein L1TD1 associates with its ancestor L1 ORF1p to promote LINE-1 retrotransposition
Source: eLife. 2025 Mar 20;13:RP96850. doi: 10.7554/eLife.96850 (PMC11925450; doi:10.7554/eLife.96850)
Supplement: Figure 1—figure supplement 1—source data 1. [file elife-96850-fig1-figsupp1-data1.xlsx]

## Sheet: 1S1A
		ensembl	log2FoldChange	lfcSE	pvalue	padj	group_RNA	gene_name_DB	highlight
	748	ENSG00000119772	1.8179	0.0665	1.54644e-164	4.02022e-162	up	DNMT3A	DNMT3A
	1371	ENSG00000088305	1.15522	0.0622267	6.20243e-77	4.29344e-75	up	DNMT3B	DNMT3B
	318	ENSG00000240747	3.04913	0.265242	1.38706e-30	3.00769e-29	up	KRBOX1	KRBOX1
	110	ENSG00000240563	4.50691	0.184331	5.02848e-132	8.46412e-130	up	L1TD1	L1TD1
	494	ENSG00000126752	2.36475	0.309151	2.02276e-14	2.12608e-13	up	SSX1	SSX1
	91	ENSG00000165584	4.61792	0.272491	2.02225e-64	1.04447e-62	up	SSX3	SSX3
	233	ENSG00000136866	3.48722	0.263863	7.08844e-40	2.05512e-38	up	ZFP37	ZFP37
	413	ENSG00000131849	2.63733	0.275938	1.20405e-21	1.83644e-20	up	ZNF132	ZNF132
	613	ENSG00000149050	2.06303	0.27907	1.44094e-13	1.43952e-12	up	ZNF214	ZNF214
	64	ENSG00000278318	5.10162	0.228879	4.65554e-110	5.67321e-108	up	ZNF229	ZNF229
	354	ENSG00000159915	2.87353	0.264999	2.14036e-27	4.13184e-26	up	ZNF233	ZNF233
	205	ENSG00000083844	3.67081	0.175917	1.07518e-96	1.04382e-94	up	ZNF264	ZNF264
	420	ENSG00000267508	2.61171	0.303849	8.29651e-18	1.04813e-16	up	ZNF285	ZNF285
	42	ENSG00000145908	5.63122	0.218997	8.20989e-146	1.71506e-143	up	ZNF300	ZNF300
	223	ENSG00000182986	3.55963	0.214603	8.6486e-62	4.20689e-60	up	ZNF320	ZNF320
	92	ENSG00000198185	4.6168	0.228578	1.02079e-90	8.84571e-89	up	ZNF334	ZNF334
	334	ENSG00000118620	2.95498	0.155861	3.71882e-80	2.75346e-78	up	ZNF430	ZNF430
	523	ENSG00000197647	2.26938	0.262531	5.4164e-18	6.9099e-17	up	ZNF433	ZNF433
	211	ENSG00000203326	3.64173	0.246916	3.12833e-49	1.1618e-47	up	ZNF525	ZNF525
	196	ENSG00000167555	3.74272	0.25239	9.50245e-50	3.59755e-48	up	ZNF528	ZNF528
	85	ENSG00000198028	4.66915	0.233057	2.76283e-89	2.3421e-87	up	ZNF560	ZNF560
	501	ENSG00000083828	2.34289	0.152542	3.08554e-53	1.25117e-51	up	ZNF586	ZNF586
	309	ENSG00000198046	3.08404	0.186174	1.24082e-61	6.02311e-60	up	ZNF667	ZNF667
	144	ENSG00000197928	4.17606	0.249048	4.17779e-63	2.0931e-61	up	ZNF677	ZNF677
	45	ENSG00000160352	5.50648	0.191863	3.79823e-181	1.23426e-178	up	ZNF714	ZNF714
	320	ENSG00000197162	3.04158	0.267217	5.11426e-30	1.0751e-28	up	ZNF785	ZNF785
	193	ENSG00000185869	3.75301	0.238816	1.19196e-55	5.10773e-54	up	ZNF829	ZNF829
	267	ENSG00000105750	3.25661	0.235598	1.85754e-43	5.897e-42	up	ZNF85	ZNF85
	322	ENSG00000234284	3.01456	0.281685	9.97347e-27	1.88185e-25	up	ZNF879	ZNF879
	118	ENSG00000221923	4.41462	0.227887	1.33002e-83	1.04776e-81	up	ZNF880	ZNF880
	244	ENSG00000184635	3.39954	0.236543	7.78569e-47	2.69072e-45	up	ZNF93	ZNF93
	1	ENSG00000147381	8.8688	0.186846	0	0	up	MAGEA4
	2	ENSG00000198883	8.61554	0.186551	0	0	up	PNMA5
	3	ENSG00000099399	8.31536	0.193513	0	0	up	MAGEB2
	4	ENSG00000213401	8.24539	0.193886	0	0	up	MAGEA12
	5	ENSG00000221867	7.90407	0.197904	0	0	up	MAGEA3
	6	ENSG00000189060	7.72837	0.191073	0	0	up	H1-0
	7	ENSG00000197172	7.6626	0.20092	0	0	up	MAGEA3
	8	ENSG00000126890	7.40099	0.200628	6.92583e-298	6.23245e-295	up	CTAG2
	9	ENSG00000143194	7.36093	0.196423	2.35996e-307	2.50982e-304	up	MAEL
	10	ENSG00000176087	7.34182	0.198389	8.78035e-300	8.21736e-297	up	SLC35A4
	11	ENSG00000124092	7.18778	0.209561	8.05299e-258	5.09232e-255	up	CTCFL
	12	ENSG00000100867	7.06778	0.099222	0	0	up	DHRS2
	13	ENSG00000214107	7.00674	0.206317	8.38298e-253	5.02914e-250	up	MAGEB1
	14	ENSG00000124260	6.92345	0.204869	2.3726e-250	1.35394e-247	up	MAGEA10
	15	ENSG00000141096	6.63507	0.238488	2.39047e-170	6.50346e-168	up	DPEP3
	16	ENSG00000069482	6.60498	0.207418	1.60441e-222	7.82052e-220	up	GAL
	17	ENSG00000100285	6.58647	0.209918	4.25262e-216	1.95095e-213	up	NEFH
	18	ENSG00000198930	6.43258	0.212482	2.56101e-201	9.98667e-199	up	CSAG1
	19	ENSG00000106624	6.32665	0.194083	4.42406e-233	2.30022e-230	up	AEBP1
	20	ENSG00000007038	6.27055	0.236119	2.14854e-155	5.02693e-153	up	PRSS21
	21	ENSG00000198467	6.17469	0.111253	0	0	up	TPM2
	22	ENSG00000265843	6.16321	0.215233	2.46125e-180	7.88846e-178	up	LINC01029
	23	ENSG00000185686	6.15371	0.109558	0	0	up	PRAME
	24	ENSG00000123407	6.14281	0.201985	3.7862e-203	1.52734e-200	up	HOXC12
	25	ENSG00000165905	6.12926	0.215493	5.95242e-178	1.83249e-175	up	LARGE2
	26	ENSG00000177034	6.07838	0.211279	5.16695e-182	1.72702e-179	up	MTX3
	27	ENSG00000198681	6.0024	0.214562	3.25601e-172	9.52261e-170	up	MAGEA1
	28	ENSG00000196793	5.97788	0.220588	9.91095e-162	2.52051e-159	up	ZNF239
	29	ENSG00000168077	5.97763	0.223391	9.81966e-158	2.44415e-155	up	SCARA3
	30	ENSG00000013297	5.94987	0.193526	1.44217e-207	6.24861e-205	up	CLDN11
	31	ENSG00000072041	5.94898	0.264575	5.812e-112	7.31093e-110	up	SLC6A15
	32	ENSG00000188725	5.92267	0.207994	2.37489e-178	7.40872e-176	up	SMIM15
	33	ENSG00000185247	5.77335	0.216849	3.59645e-156	8.58633e-154	up	MAGEA11
	34	ENSG00000144468	5.75887	0.217544	2.02204e-154	4.68412e-152	up	RHBDD1
	35	ENSG00000158639	5.70971	0.226616	4.48734e-140	8.53579e-138	up	PAGE5
	36	ENSG00000136110	5.69569	0.237987	1.39777e-126	2.12361e-124	up	CNMD
	37	ENSG00000100600	5.68699	0.220942	4.19643e-146	8.8454e-144	up	LGMN
	38	ENSG00000000003	5.65606	0.154807	2.94877e-292	2.37904e-289	up	TSPAN6
	39	ENSG00000215146	5.65527	0.219082	6.25285e-147	1.32998e-144	up	NA
	40	ENSG00000178445	5.6458	0.202417	3.34488e-171	9.42895e-169	up	GLDC
	41	ENSG00000129654	5.64277	0.230284	1.35455e-132	2.30399e-130	up	FOXJ1
	43	ENSG00000233098	5.55893	0.183059	1.5022e-202	5.95712e-200	up	LOC339260
	44	ENSG00000109113	5.53122	0.155628	1.1273e-276	7.99257e-274	up	RAB34
	46	ENSG00000263753	5.45258	0.221037	2.35008e-134	4.10335e-132	up	LINC00667
	47	ENSG00000181291	5.38127	0.195978	5.49016e-166	1.45969e-163	up	TMEM132E
	48	ENSG00000167775	5.36933	0.12881	0	0	up	CD320
	49	ENSG00000007350	5.34879	0.145945	4.67124e-294	3.90332e-291	up	TKTL1
	50	ENSG00000106484	5.34711	0.159112	1.37016e-247	7.45524e-245	up	MEST
	51	ENSG00000185904	5.33494	0.22811	5.726e-121	8.02222e-119	up	LINC00839
	52	ENSG00000171812	5.32092	0.225528	4.5245e-123	6.45487e-121	up	COL8A2
	53	ENSG00000229807	5.31728	0.2426	1.75469e-106	2.01247e-104	up	XIST
	54	ENSG00000279003	5.27918	0.246942	2.13324e-101	2.2687e-99	up	NA
	55	ENSG00000183072	5.23988	0.225974	6.02646e-119	8.10352e-117	up	NKX2-5
	56	ENSG00000168806	5.22935	0.20886	2.38244e-138	4.42397e-136	up	LCMT2
	57	ENSG00000092051	5.21909	0.221011	2.72801e-123	3.91579e-121	up	JPH4
	58	ENSG00000240225	5.21778	0.216596	3.18471e-128	4.96751e-126	up	NA
	59	ENSG00000120669	5.21466	0.19549	9.23115e-157	2.22661e-154	up	SOHLH2
	60	ENSG00000168803	5.19814	0.227171	7.00907e-116	9.11062e-114	up	MAPDA
	61	ENSG00000198865	5.13432	0.220138	2.58141e-120	3.532e-118	up	CCDC152
	62	ENSG00000104691	5.13395	0.232279	2.9854e-108	3.51002e-106	up	UBXN8
	63	ENSG00000161544	5.11206	0.216055	9.11509e-124	1.31646e-121	up	CYGB
	65	ENSG00000114405	5.0043	0.225105	1.72577e-109	2.08133e-107	up	CEP15
	66	ENSG00000159164	4.97178	0.161894	4.17892e-207	1.77771e-204	up	SV2A
	67	ENSG00000101335	4.9642	0.228346	8.62467e-105	9.65509e-103	up	MYL9
	68	ENSG00000132164	4.93556	0.233226	2.13185e-99	2.16865e-97	up	SLC6A11
	69	ENSG00000166347	4.92363	0.227331	5.05592e-104	5.57988e-102	up	CYB5A
	70	ENSG00000198054	4.91952	0.236829	7.67413e-96	7.29885e-94	up	DSCR8
	71	ENSG00000177932	4.89916	0.229616	5.22892e-101	5.5358e-99	up	ZNF354C
	72	ENSG00000106538	4.85935	0.235592	1.59926e-94	1.47896e-92	up	RARRES2
	73	ENSG00000214897	4.84874	0.254918	1.14661e-80	8.59846e-79	up	PNMA6E
	74	ENSG00000255737	4.81482	0.240912	7.31734e-89	6.15841e-87	up	AGAP2-AS1
	75	ENSG00000182636	4.7856	0.251952	1.90804e-80	1.42173e-78	up	NDN
	76	ENSG00000011677	4.77218	0.234762	7.31145e-92	6.40696e-90	up	GABRA3
	77	ENSG00000184524	4.77018	0.246203	1.25541e-83	9.92324e-82	up	CEND1
	78	ENSG00000180178	4.76625	0.221582	1.25126e-102	1.35536e-100	up	NA
	79	ENSG00000184697	4.7236	0.233816	9.36963e-91	8.14949e-89	up	CLDN6
	80	ENSG00000183166	4.72143	0.228273	4.90392e-95	4.58949e-93	up	CALN1
	81	ENSG00000224078	4.6917	0.227958	4.02708e-94	3.70951e-92	up	NA
	82	ENSG00000131668	4.68513	0.135899	1.8967e-260	1.23269e-257	up	BARX1
	83	ENSG00000101115	4.67636	0.228637	5.63007e-93	5.06641e-91	up	SALL4
	84	ENSG00000205362	4.6736	0.245384	7.07735e-81	5.35886e-79	up	MT1A
	86	ENSG00000263711	4.65493	0.249241	7.70527e-78	5.47964e-76	up	LINC02864
	87	ENSG00000166049	4.63963	0.256708	5.14742e-73	3.24621e-71	up	PASD1
	88	ENSG00000184368	4.62781	0.212499	3.75199e-105	4.22045e-103	up	MAP7D2
	89	ENSG00000166394	4.6211	0.218128	1.3063e-99	1.34051e-97	up	CYB5R2
	90	ENSG00000048545	4.61965	0.237336	2.19409e-84	1.75805e-82	up	GUCA1A
	93	ENSG00000278811	4.60796	0.18323	1.46812e-139	2.74797e-137	up	LINC00624
	94	ENSG00000067445	4.60383	0.213877	8.97115e-103	9.7627e-101	up	TRO
	95	ENSG00000131914	4.59478	0.110705	0	0	up	LIN28A
	96	ENSG00000169594	4.57262	0.192554	1.17401e-124	1.71677e-122	up	BNC1
	97	ENSG00000154553	4.57059	0.227833	1.61454e-89	1.37365e-87	up	PDLIM3
	98	ENSG00000102287	4.55822	0.23409	1.89413e-84	1.52817e-82	up	GABRE
	99	ENSG00000125144	4.55408	0.2456	9.3531e-77	6.43631e-75	up	MT1G
	100	ENSG00000100842	4.55243	0.222459	4.49745e-93	4.07856e-91	up	EFS
	101	ENSG00000196653	4.5469	0.239623	2.73321e-80	2.03012e-78	up	ZNF502
	102	ENSG00000128710	4.54298	0.222004	4.55571e-93	4.11544e-91	up	HOXD10
	103	ENSG00000184735	4.53703	0.240839	3.65463e-79	2.64729e-77	up	DDX53
	104	ENSG00000169059	4.53524	0.239645	7.11617e-80	5.21934e-78	up	VCX3A
	105	ENSG00000253250	4.5337	0.237442	2.83693e-81	2.16914e-79	up	C8orf88
	106	ENSG00000175414	4.5288	0.179677	3.50841e-140	6.72839e-138	up	ARL10
	107	ENSG00000167874	4.50964	0.226933	7.08904e-88	5.92366e-86	up	TMEM88
	108	ENSG00000136574	4.50861	0.161178	3.4814e-172	1.00561e-169	up	GATA4
	109	ENSG00000088543	4.50847	0.216708	3.95533e-96	3.79274e-94	up	C3orf18
	111	ENSG00000250742	4.48622	0.251569	3.92275e-71	2.36548e-69	up	LINC02381
	112	ENSG00000160284	4.47583	0.248533	1.65641e-72	1.03072e-70	up	SPATC1L
	113	ENSG00000186603	4.46454	0.272294	2.04165e-60	9.65019e-59	up	HPDL
	114	ENSG00000056291	4.46396	0.239118	8.93868e-78	6.31838e-76	up	NPFFR2
	115	ENSG00000169551	4.44959	0.253229	4.07656e-69	2.33201e-67	up	CT55
	116	ENSG00000106633	4.42025	0.243884	2.04749e-73	1.31247e-71	up	GCK
	117	ENSG00000073803	4.41994	0.184162	2.76097e-127	4.2499e-125	up	MAP3K13
	119	ENSG00000264334	4.40709	0.246251	1.25031e-71	7.61809e-70	up	NA
	120	ENSG00000130540	4.39768	0.251405	1.63662e-68	9.22697e-67	up	SULT4A1
	121	ENSG00000206549	4.37963	0.258644	2.56563e-64	1.3193e-62	up	NA
	122	ENSG00000107562	4.36813	0.242185	1.01029e-72	6.32024e-71	up	CXCL12
	123	ENSG00000268089	4.36454	0.168511	6.55579e-148	1.40721e-145	up	GABRQ
	124	ENSG00000143768	4.35098	0.2847	9.97077e-53	3.9878e-51	up	LEFTY2
	125	ENSG00000159182	4.34439	0.271932	1.87776e-57	8.3366e-56	up	PRAC1
	126	ENSG00000182632	4.33675	0.245746	1.0685e-69	6.23433e-68	up	NA
	127	ENSG00000134871	4.33518	0.250561	4.55246e-67	2.48864e-65	up	COL4A2
	128	ENSG00000164867	4.3075	0.204911	4.18703e-98	4.15101e-96	up	NOS3
	129	ENSG00000229637	4.30659	0.254931	5.0522e-64	2.58092e-62	up	PRAC2
	130	ENSG00000074410	4.30441	0.239212	2.16721e-72	1.34499e-70	up	CA12
	131	ENSG00000204832	4.27794	0.290836	5.63445e-49	2.07933e-47	up	ST8SIA6-AS1
	132	ENSG00000146122	4.27234	0.238783	1.35819e-71	8.25389e-70	up	DAAM2
	133	ENSG00000013016	4.26989	0.201297	7.41343e-100	7.74339e-98	up	EHD3
	134	ENSG00000175793	4.26954	0.162807	1.39333e-151	3.16502e-149	up	SFN
	135	ENSG00000226057	4.26864	0.243576	9.25807e-69	5.25755e-67	up	NA
	136	ENSG00000165496	4.25122	0.242952	1.47995e-68	8.3841e-67	up	RPL10L
	137	ENSG00000078549	4.23877	0.248931	5.10406e-65	2.67757e-63	up	ADCYAP1R1
	138	ENSG00000260027	4.23335	0.16528	1.08877e-144	2.23455e-142	up	HOXB7
	139	ENSG00000179455	4.22764	0.23682	2.80386e-71	1.69514e-69	up	MKRN3
	140	ENSG00000196593	4.2208	0.23527	5.72005e-72	3.5219e-70	up	NA
	141	ENSG00000157349	4.21485	0.266797	3.21353e-56	1.40274e-54	up	DDX19B
	142	ENSG00000183837	4.1963	0.244297	3.9425e-66	2.11566e-64	up	PNMA3
	143	ENSG00000180964	4.18628	0.133102	3.99001e-217	1.86709e-214	up	TCEAL8
	145	ENSG00000228623	4.17527	0.254422	1.6008e-60	7.59715e-59	up	ZNF883
	146	ENSG00000164616	4.17191	0.250989	4.84199e-62	2.38e-60	up	NA
	147	ENSG00000128709	4.14607	0.16974	9.05467e-132	1.49192e-129	up	HOXD9
	148	ENSG00000197702	4.13043	0.242193	3.24923e-65	1.71221e-63	up	PARVA
	149	ENSG00000242498	4.10871	0.289541	1.05051e-45	3.48634e-44	up	ARPIN
	150	ENSG00000224559	4.09111	0.251825	2.39057e-59	1.10757e-57	up	LINC01087
	151	ENSG00000269821	4.08171	0.237614	3.88834e-66	2.09139e-64	up	KCNQ1OT1
	152	ENSG00000155980	4.05785	0.193121	5.10076e-98	5.03555e-96	up	KIF5A
	153	ENSG00000205628	4.05621	0.243955	4.45128e-62	2.19256e-60	up	LINC01446
	154	ENSG00000182240	4.05357	0.253288	1.20199e-57	5.36696e-56	up	BACE2
	155	ENSG00000135549	4.0529	0.145208	1.96505e-171	5.60686e-169	up	PKIB
	156	ENSG00000158296	4.04732	0.25058	1.1023e-58	5.01761e-57	up	SLC13A3
	157	ENSG00000184302	4.04346	0.28486	9.90418e-46	3.29172e-44	up	SIX6
	158	ENSG00000272763	4.03963	0.232131	7.91591e-68	4.37845e-66	up	NA
	159	ENSG00000237298	4.03285	0.229609	4.65297e-69	2.65526e-67	up	TTN-AS1
	160	ENSG00000083290	4.01141	0.247539	4.63665e-59	2.13131e-57	up	ULK2
	161	ENSG00000143469	4.01051	0.246076	1.02262e-59	4.76617e-58	up	SYT14
	162	ENSG00000116774	3.99356	0.126451	6.54559e-219	3.12545e-216	up	OLFML3
	163	ENSG00000120451	3.97984	0.10751	5.82947e-300	5.68301e-297	up	SNX19
	164	ENSG00000163520	3.97536	0.246352	1.40388e-58	6.35329e-57	up	FBLN2
	165	ENSG00000104870	3.97459	0.206382	1.20114e-82	9.36771e-81	up	FCGRT
	166	ENSG00000181433	3.96399	0.267941	1.59516e-49	6.00033e-48	up	SAGE1
	167	ENSG00000168952	3.95642	0.253655	7.5544e-55	3.17135e-53	up	STXBP6
	168	ENSG00000169981	3.95127	0.199233	1.56384e-87	1.29749e-85	up	ZNF35
	169	ENSG00000259848	3.94701	0.237677	6.23692e-62	3.04011e-60	up	NA
	170	ENSG00000206172	3.93747	0.168715	1.82799e-120	2.51585e-118	up	HBA1
	171	ENSG00000198715	3.93231	0.252205	8.28838e-55	3.46911e-53	up	GLMP
	172	ENSG00000137841	3.92946	0.240417	4.77254e-60	2.23326e-58	up	PLCB2
	173	ENSG00000080007	3.92369	0.248931	5.66417e-56	2.45416e-54	up	DDX43
	174	ENSG00000164318	3.91634	0.237374	3.75312e-61	1.80683e-59	up	EGFLAM
	175	ENSG00000115297	3.91389	0.264202	1.18905e-49	4.47989e-48	up	TLX2
	176	ENSG00000185404	3.89168	0.253985	5.40778e-53	2.17398e-51	up	SP140L
	177	ENSG00000169418	3.87096	0.247404	3.52121e-55	1.48711e-53	up	NPR1
	178	ENSG00000182985	3.86329	0.105988	6.82656e-291	5.32403e-288	up	CADM1
	179	ENSG00000228709	3.84839	0.264023	3.99215e-48	1.42385e-46	up	NA
	180	ENSG00000156466	3.84441	0.212402	3.2081e-73	2.03967e-71	up	GDF6
	181	ENSG00000183421	3.84425	0.230463	1.81532e-62	9.03684e-61	up	RIPK4
	182	ENSG00000115380	3.83913	0.251306	1.09308e-52	4.35685e-51	up	EFEMP1
	183	ENSG00000134873	3.83315	0.232754	6.16066e-61	2.94165e-59	up	CLDN10
	184	ENSG00000166501	3.82356	0.248185	1.48962e-53	6.11451e-52	up	PRKCB
	185	ENSG00000166770	3.8098	0.204365	1.46205e-77	1.02112e-75	up	ZNF667-AS1
	186	ENSG00000162444	3.80959	0.278396	1.26435e-42	3.92856e-41	up	RBP7
	187	ENSG00000188536	3.80755	0.248777	7.0728e-53	2.83846e-51	up	HBA2
	188	ENSG00000168754	3.79742	0.239323	1.06634e-56	4.68089e-55	up	FAM178B
	189	ENSG00000131771	3.78735	0.260801	8.7923e-48	3.10745e-46	up	PPP1R1B
	190	ENSG00000120915	3.78259	0.232218	1.1832e-59	5.4927e-58	up	EPHX2
	191	ENSG00000165118	3.77993	0.290415	9.97212e-39	2.80767e-37	up	QNG1
	192	ENSG00000186446	3.75668	0.259263	1.40417e-47	4.94036e-46	up	ZNF501
	194	ENSG00000156269	3.75249	0.240406	6.32403e-55	2.66601e-53	up	NAA11
	195	ENSG00000166821	3.74923	0.263002	4.13999e-46	1.39774e-44	up	PEX11A
	197	ENSG00000155495	3.74125	0.28865	2.03008e-38	5.64778e-37	up	MAGEC1
	198	ENSG00000127399	3.73447	0.300898	2.27529e-35	5.84998e-34	up	LRRC61
	199	ENSG00000258484	3.72932	0.223873	2.63863e-62	1.3052e-60	up	SPESP1
	200	ENSG00000170370	3.7241	0.248079	6.15199e-51	2.37914e-49	up	EMX2
	201	ENSG00000126803	3.71962	0.278553	1.13177e-40	3.37324e-39	up	HSPA2
	202	ENSG00000131080	3.70068	0.159297	2.19687e-119	2.97111e-117	up	EDA2R
	203	ENSG00000272077	3.70058	0.248875	5.22188e-50	1.98661e-48	up	NA
	204	ENSG00000175182	3.68059	0.227803	1.01538e-58	4.63096e-57	up	FAM131A
	206	ENSG00000136531	3.66069	0.268389	2.3325e-42	7.17129e-41	up	SCN2A
	207	ENSG00000103381	3.65685	0.267587	1.62009e-42	5.00729e-41	up	CPPED1
	208	ENSG00000066923	3.65595	0.20598	1.75214e-70	1.04846e-68	up	STAG3
	209	ENSG00000238222	3.64725	0.261751	3.93542e-44	1.26306e-42	up	NA
	210	ENSG00000158691	3.64631	0.260202	1.2905e-44	4.18196e-43	up	ZSCAN12
	212	ENSG00000124721	3.61694	0.252797	1.95923e-46	6.67252e-45	up	DNAH8
	213	ENSG00000006757	3.61679	0.265881	3.84271e-42	1.17527e-40	up	PNPLA4
	214	ENSG00000168004	3.61612	0.14066	9.45592e-146	1.95788e-143	up	PLAAT5
	215	ENSG00000104321	3.61134	0.196989	4.5403e-75	3.04382e-73	up	TRPA1
	216	ENSG00000176720	3.61057	0.176416	4.31386e-93	3.92729e-91	up	BOK
	217	ENSG00000187498	3.60121	0.276867	1.11681e-38	3.13311e-37	up	COL4A1
	218	ENSG00000149292	3.59214	0.263989	3.62971e-42	1.11158e-40	up	TTC12
	219	ENSG00000134072	3.58974	0.246745	5.97827e-48	2.1193e-46	up	CAMK1
	220	ENSG00000148408	3.58813	0.251233	2.83022e-46	9.61085e-45	up	CACNA1B
	221	ENSG00000196917	3.58605	0.296609	1.19078e-33	2.87222e-32	up	HCAR1
	222	ENSG00000232040	3.57616	0.254671	8.59155e-45	2.79578e-43	up	SCAND3
	224	ENSG00000229967	3.55244	0.25937	1.0663e-42	3.32644e-41	up	NA
	225	ENSG00000254585	3.55191	0.267091	2.36125e-40	6.9932e-39	up	MAGEL2
	226	ENSG00000176884	3.53754	0.244939	2.79272e-47	9.75241e-46	up	GRIN1
	227	ENSG00000156966	3.53438	0.252041	1.12615e-44	3.65443e-43	up	B3GNT7
	228	ENSG00000074657	3.53286	0.225627	2.92893e-55	1.2437e-53	up	ZNF532
	229	ENSG00000189229	3.53203	0.247684	3.87322e-46	1.31146e-44	up	LOC105376944
	230	ENSG00000215808	3.53164	0.265113	1.74179e-40	5.17165e-39	up	LINC01139
	231	ENSG00000135439	3.52421	0.261468	2.09203e-41	6.34852e-40	up	AGAP2
	232	ENSG00000167355	3.49167	0.290277	2.5088e-33	5.98964e-32	up	OR51B5
	234	ENSG00000183117	3.48342	0.133094	5.446e-151	1.22519e-148	up	CSMD1
	235	ENSG00000149294	3.47919	0.24714	5.19854e-45	1.70112e-43	up	NCAM1
	236	ENSG00000154096	3.47704	0.206887	2.18751e-63	1.10542e-61	up	THY1
	237	ENSG00000123388	3.45374	0.120834	1.10426e-179	3.49139e-177	up	HOXC11
	238	ENSG00000159212	3.44621	0.266917	3.89337e-38	1.07548e-36	up	CLIC6
	239	ENSG00000213694	3.43409	0.23291	3.34823e-49	1.23953e-47	up	S1PR3
	240	ENSG00000156345	3.43303	0.267544	1.09027e-37	2.9905e-36	up	CDK20
	241	ENSG00000117122	3.42883	0.188771	9.95953e-74	6.43751e-72	up	MFAP2
	242	ENSG00000232677	3.42707	0.154339	3.08111e-109	3.678e-107	up	LINC00665
	243	ENSG00000169220	3.41966	0.193219	4.31945e-70	2.56503e-68	up	RGS14
	245	ENSG00000234465	3.39264	0.271821	9.46188e-36	2.46372e-34	up	PINLYP
	246	ENSG00000175318	3.39149	0.272316	1.32605e-35	3.43964e-34	up	GRAMD2A
	247	ENSG00000241472	3.3848	0.258204	2.92375e-39	8.33215e-38	up	PTPRG-AS1
	248	ENSG00000223756	3.36906	0.244663	3.85046e-43	1.20925e-41	up	NA
	249	ENSG00000133134	3.3658	0.221292	3.04456e-52	1.20735e-50	up	BEX2
	250	ENSG00000113108	3.36432	0.269109	7.30806e-36	1.90833e-34	up	APBB3
	251	ENSG00000178498	3.36141	0.279069	2.05827e-33	4.93417e-32	up	DTX3
	252	ENSG00000231421	3.34875	0.289128	5.07021e-31	1.11492e-29	up	NA
	253	ENSG00000046774	3.34219	0.297099	2.33174e-29	4.80667e-28	up	MAGEC2
	254	ENSG00000184029	3.34029	0.27531	7.07495e-34	1.72071e-32	up	DSCR4
	255	ENSG00000164078	3.33719	0.276524	1.55221e-33	3.72865e-32	up	MST1R
	256	ENSG00000132204	3.33631	0.263064	7.3922e-37	1.98799e-35	up	NA
	257	ENSG00000165863	3.33414	0.263115	8.47543e-37	2.27669e-35	up	SPMIP5
	258	ENSG00000157601	3.32947	0.267477	1.43988e-35	3.73078e-34	up	MX1
	259	ENSG00000228630	3.29026	0.18853	3.31588e-68	1.84718e-66	up	HOTAIR
	260	ENSG00000238129	3.28423	0.267982	1.57204e-34	3.94223e-33	up	NA
	261	ENSG00000166349	3.28043	0.224693	2.82468e-48	1.01519e-46	up	RAG1
	262	ENSG00000204434	3.27276	0.264823	4.3933e-35	1.12216e-33	up	NA
	263	ENSG00000165646	3.27022	0.249985	4.1917e-39	1.18877e-37	up	SLC18A2
	264	ENSG00000125398	3.26166	0.295232	2.24647e-28	4.49237e-27	up	SOX9
	265	ENSG00000145945	3.25843	0.258595	2.09773e-36	5.5584e-35	up	FAM50B
	266	ENSG00000146648	3.25669	0.268943	9.4374e-34	2.28342e-32	up	EGFR
	268	ENSG00000269190	3.25459	0.165196	2.09904e-86	1.71119e-84	up	FBXO17
	269	ENSG00000107957	3.25455	0.133249	9.39532e-132	1.53722e-129	up	SH3PXD2A
	270	ENSG00000106992	3.25016	0.245111	3.95244e-40	1.15594e-38	up	AK1
	271	ENSG00000112297	3.24875	0.163565	8.65871e-88	7.20954e-86	up	CRYBG1
	272	ENSG00000265646	3.24104	0.273623	2.28642e-32	5.29657e-31	up	TUFMP1
	273	ENSG00000156009	3.24085	0.276294	8.97934e-32	2.03575e-30	up	MAGEA8
	274	ENSG00000184860	3.23801	0.261414	3.09256e-35	7.92515e-34	up	SDR42E1
	275	ENSG00000278266	3.2156	0.272662	4.22467e-32	9.68115e-31	up	NA
	276	ENSG00000166426	3.2137	0.184305	4.33353e-68	2.40835e-66	up	CRABP1
	277	ENSG00000182022	3.20975	0.228423	7.51167e-45	2.45119e-43	up	CHST15
	278	ENSG00000105146	3.20848	0.278268	9.29479e-31	2.02486e-29	up	AURKC
	279	ENSG00000205089	3.20413	0.261745	1.86728e-34	4.66263e-33	up	CCNI2
	280	ENSG00000156414	3.19966	0.294575	1.74982e-27	3.40038e-26	up	TDRD9
	281	ENSG00000267313	3.19713	0.262726	4.54264e-34	1.11176e-32	up	KC6
	282	ENSG00000234511	3.18915	0.272322	1.12009e-31	2.52718e-30	up	C5orf58
	283	ENSG00000010327	3.17851	0.281344	1.34843e-29	2.7994e-28	up	STAB1
	284	ENSG00000176769	3.17671	0.276411	1.43524e-30	3.10928e-29	up	TCERG1L
	285	ENSG00000198848	3.17285	0.278801	5.24033e-30	1.10061e-28	up	CES1
	286	ENSG00000121440	3.17146	0.237576	1.19694e-40	3.56295e-39	up	PDZRN3
	287	ENSG00000101489	3.16996	0.271976	2.1555e-31	4.82144e-30	up	CELF4
	288	ENSG00000142089	3.16951	0.26417	3.63964e-33	8.66295e-32	up	IFITM3
	289	ENSG00000161940	3.16028	0.247404	2.2982e-37	6.25972e-36	up	BCL6B
	290	ENSG00000141485	3.15449	0.295858	1.52991e-26	2.86821e-25	up	SLC13A5
	291	ENSG00000188002	3.15072	0.284167	1.44158e-28	2.89517e-27	up	NA
	292	ENSG00000204789	3.14296	0.265469	2.44546e-32	5.6594e-31	up	NA
	293	ENSG00000103034	3.14281	0.18323	6.04839e-66	3.22356e-64	up	NDRG4
	294	ENSG00000138835	3.13946	0.215052	2.86501e-48	1.02811e-46	up	RGS3
	295	ENSG00000255455	3.13442	0.251481	1.17543e-35	3.05235e-34	up	NA
	296	ENSG00000251381	3.13359	0.288012	1.43416e-27	2.79626e-26	up	LINC00958
	297	ENSG00000226887	3.12772	0.244254	1.53292e-37	4.18015e-36	up	ERVMER34-1
	298	ENSG00000236279	3.12656	0.255067	1.52622e-34	3.83144e-33	up	CLEC2L
	299	ENSG00000174292	3.12361	0.291705	9.32546e-27	1.76527e-25	up	TNK1
	300	ENSG00000165633	3.10781	0.225465	3.18242e-43	1.00349e-41	up	VSTM4
	301	ENSG00000087495	3.10733	0.272877	4.83791e-30	1.02067e-28	up	PHACTR3
	302	ENSG00000148942	3.10579	0.220612	5.18135e-45	1.69787e-43	up	SLC5A12
	303	ENSG00000181626	3.10339	0.288846	6.31619e-27	1.20244e-25	up	ANKRD62
	304	ENSG00000173482	3.09895	0.263646	6.71766e-32	1.52595e-30	up	PTPRM
	305	ENSG00000121310	3.09558	0.262587	4.46042e-32	1.02014e-30	up	ECHDC2
	306	ENSG00000185100	3.09324	0.266154	3.18664e-31	7.0805e-30	up	ADSS1
	307	ENSG00000267978	3.09218	0.28064	3.11917e-28	6.20572e-27	up	MAGEA9
	308	ENSG00000142765	3.08725	0.27719	8.22527e-29	1.672e-27	up	SYTL1
	310	ENSG00000113196	3.07397	0.272369	1.53732e-29	3.18589e-28	up	HAND1
	311	ENSG00000186281	3.07203	0.291771	6.35811e-26	1.17412e-24	up	GPAT2
	312	ENSG00000176746	3.07042	0.27287	2.25642e-29	4.65961e-28	up	MAGEB6
	313	ENSG00000108786	3.06628	0.185774	3.35263e-61	1.61735e-59	up	HSD17B1
	314	ENSG00000143032	3.06267	0.22161	1.92783e-43	6.11184e-42	up	BARHL2
	315	ENSG00000268940	3.05876	0.256728	9.95863e-33	2.33002e-31	up	CT45A1
	316	ENSG00000138738	3.0565	0.242142	1.58206e-36	4.21589e-35	up	PRDM5
	317	ENSG00000223564	3.05425	0.261184	1.37033e-31	3.07988e-30	up	CYP4F32P
	319	ENSG00000113296	3.04727	0.163354	1.16289e-77	8.17064e-76	up	THBS4
	321	ENSG00000171160	3.02462	0.30724	7.24079e-23	1.16756e-21	up	MORN4
	323	ENSG00000164089	3.01395	0.25889	2.52576e-31	5.62811e-30	up	ETNPPL
	324	ENSG00000268916	3.01052	0.28261	1.69631e-26	3.17508e-25	up	CSAG3
	325	ENSG00000229847	3.00858	0.292357	7.75382e-25	1.37021e-23	up	EMX2OS
	326	ENSG00000093072	3.00372	0.231533	1.73592e-38	4.84091e-37	up	ADA2
	327	ENSG00000145242	2.99284	0.259209	7.72795e-31	1.68982e-29	up	EPHA5
	328	ENSG00000008323	2.99199	0.289758	5.38675e-25	9.54801e-24	up	PLEKHG6
	329	ENSG00000166833	2.99161	0.204218	1.36499e-48	4.95912e-47	up	NAV2
	330	ENSG00000261761	2.98923	0.279745	1.18914e-26	2.23473e-25	up	LINC02616
	331	ENSG00000112414	2.98578	0.15713	1.64273e-80	1.22795e-78	up	ADGRG6
	332	ENSG00000160161	2.97817	0.169256	2.66042e-69	1.53315e-67	up	CILP2
	333	ENSG00000151025	2.96329	0.246832	3.33416e-33	7.94393e-32	up	GPR158
	335	ENSG00000178096	2.95187	0.248986	2.0132e-32	4.67755e-31	up	BOLA1
	336	ENSG00000128713	2.93928	0.207903	2.22223e-45	7.32302e-44	up	HOXD11
	337	ENSG00000185513	2.93821	0.266091	2.39336e-28	4.78201e-27	up	L3MBTL1
	338	ENSG00000204219	2.93475	0.26969	1.40541e-27	2.74266e-26	up	TCEA3
	339	ENSG00000197083	2.93292	0.283858	5.03083e-25	8.94424e-24	up	NA
	340	ENSG00000102109	2.93285	0.274599	1.25646e-26	2.35934e-25	up	PCSK1N
	341	ENSG00000152430	2.93085	0.285766	1.11087e-24	1.94981e-23	up	BOLL
	342	ENSG00000164241	2.92145	0.301989	3.88803e-22	6.07264e-21	up	C5orf63
	343	ENSG00000166341	2.91891	0.119123	1.35894e-132	2.30399e-130	up	DCHS1
	344	ENSG00000127903	2.91866	0.271546	6.0371e-27	1.15118e-25	up	ZNF835
	345	ENSG00000253552	2.90962	0.266766	1.06693e-27	2.09071e-26	up	NA
	346	ENSG00000160539	2.90734	0.248961	1.65378e-31	3.70628e-30	up	PLPP7
	347	ENSG00000170074	2.89408	0.304231	1.85659e-21	2.80612e-20	up	FAM153A
	348	ENSG00000075891	2.89031	0.156046	1.36691e-76	9.35133e-75	up	PAX2
	349	ENSG00000248103	2.88736	0.284881	3.851e-24	6.5864e-23	up	NA
	350	ENSG00000122756	2.88358	0.160919	8.31379e-72	5.07879e-70	up	CNTFR
	351	ENSG00000174332	2.88298	0.276974	2.25925e-25	4.06927e-24	up	GLIS1
	352	ENSG00000100628	2.88243	0.28181	1.48128e-24	2.59412e-23	up	ASB2
	353	ENSG00000115266	2.8764	0.168175	1.39432e-65	7.39746e-64	up	APC2
	355	ENSG00000149582	2.86899	0.246764	3.02368e-31	6.72481e-30	up	TMEM25
	356	ENSG00000205212	2.86342	0.291223	8.16526e-23	1.31211e-21	up	NA
	357	ENSG00000235961	2.8625	0.157971	2.19945e-73	1.40602e-71	up	PNMA6A
	358	ENSG00000117595	2.85772	0.287338	2.63819e-23	4.35609e-22	up	IRF6
	359	ENSG00000279192	2.85692	0.295253	3.80756e-22	5.95094e-21	up	PWAR5
	360	ENSG00000111275	2.8559	0.30615	1.07451e-20	1.57422e-19	up	ALDH2
	361	ENSG00000258927	2.85388	0.287405	3.08822e-23	5.08839e-22	up	NA
	362	ENSG00000198576	2.85329	0.127334	3.29862e-111	4.10521e-109	up	ARC
	363	ENSG00000165643	2.85014	0.298295	1.2387e-21	1.88439e-20	up	SOHLH1
	364	ENSG00000198821	2.83987	0.283464	1.2651e-23	2.11425e-22	up	CD247
	365	ENSG00000241186	2.83264	0.19394	2.58135e-48	9.29166e-47	up	CRIPTO
	366	ENSG00000234235	2.83243	0.307902	3.60875e-20	5.14841e-19	up	NA
	367	ENSG00000205744	2.83138	0.260879	1.92484e-27	3.73119e-26	up	DENND1C
	368	ENSG00000101986	2.83047	0.080261	1.96797e-272	1.35425e-269	up	ABCD1
	369	ENSG00000250131	2.82479	0.270712	1.7225e-25	3.13384e-24	up	AGA-DT
	370	ENSG00000164932	2.81716	0.275454	1.49561e-24	2.61727e-23	up	CTHRC1
	371	ENSG00000247516	2.81505	0.277603	3.64888e-24	6.259e-23	up	MIR4458HG
	372	ENSG00000276476	2.81493	0.282274	2.01425e-23	3.33999e-22	up	LINC00540
	373	ENSG00000182912	2.81178	0.281197	1.53405e-23	2.55642e-22	up	NA
	374	ENSG00000010319	2.8105	0.216313	1.3453e-38	3.76506e-37	up	SEMA3G
	375	ENSG00000172123	2.80436	0.21521	8.1703e-39	2.30314e-37	up	SLFN12
	376	ENSG00000009950	2.80159	0.280299	1.60299e-23	2.66941e-22	up	MLXIPL
	377	ENSG00000163362	2.80094	0.275035	2.33889e-24	4.05752e-23	up	INAVA
	378	ENSG00000120068	2.78956	0.267892	2.1629e-25	3.90473e-24	up	HOXB8
	379	ENSG00000128739	2.78908	0.297171	6.26643e-21	9.29123e-20	up	SNRPN
	380	ENSG00000203867	2.77934	0.233512	1.15067e-32	2.68416e-31	up	RBM20
	381	ENSG00000165462	2.77469	0.280313	4.22365e-23	6.90571e-22	up	PHOX2A
	382	ENSG00000257151	2.77459	0.297569	1.11853e-20	1.63666e-19	up	NA
	383	ENSG00000129295	2.77348	0.258073	6.12884e-27	1.16772e-25	up	DNAAF11
	384	ENSG00000186897	2.77347	0.0733114	0	0	up	C1QL4
	385	ENSG00000163531	2.76721	0.227741	5.69067e-34	1.38982e-32	up	NFASC
	386	ENSG00000177504	2.74502	0.273164	9.28392e-24	1.56835e-22	up	VCX2
	387	ENSG00000132622	2.74341	0.27055	3.66669e-24	6.28494e-23	up	HSPA12B
	388	ENSG00000170873	2.74137	0.211081	1.44413e-38	4.03684e-37	up	MTSS1
	389	ENSG00000125384	2.74092	0.28806	1.81519e-21	2.74531e-20	up	PTGER2
	390	ENSG00000171345	2.73933	0.289724	3.23135e-21	4.84641e-20	up	KRT19
	391	ENSG00000180113	2.73696	0.262617	1.96991e-25	3.56457e-24	up	TDRD6
	392	ENSG00000145020	2.73325	0.20833	2.53583e-39	7.23545e-38	up	AMT
	393	ENSG00000122728	2.71238	0.270282	1.06564e-23	1.79243e-22	up	TAF1L
	394	ENSG00000116885	2.69722	0.249968	3.82762e-27	7.34659e-26	up	OSCP1
	395	ENSG00000087266	2.69304	0.190729	2.87072e-45	9.44674e-44	up	SH3BP2
	396	ENSG00000117245	2.69296	0.210085	1.2929e-37	3.53802e-36	up	KIF17
	397	ENSG00000238269	2.68341	0.288839	1.53809e-20	2.23937e-19	up	PAGE2B
	398	ENSG00000087245	2.68225	0.276817	3.3384e-22	5.22816e-21	up	MMP2
	399	ENSG00000172638	2.6793	0.268453	1.85478e-23	3.07994e-22	up	EFEMP2
	400	ENSG00000228672	2.67474	0.13814	1.59864e-83	1.25515e-81	up	PROB1
	401	ENSG00000170608	2.66898	0.23871	5.06237e-29	1.03445e-27	up	FOXA3
	402	ENSG00000104332	2.668	0.0820494	6.13178e-232	3.11881e-229	up	SFRP1
	403	ENSG00000259129	2.66773	0.236293	1.47167e-29	3.05255e-28	up	LINC00648
	404	ENSG00000242599	2.65786	0.289884	4.78746e-20	6.7845e-19	up	NA
	405	ENSG00000155961	2.65456	0.229384	5.67443e-31	1.24428e-29	up	RAB39B
	406	ENSG00000146013	2.65451	0.278348	1.47489e-21	2.23787e-20	up	GFRA3
	407	ENSG00000141736	2.65202	0.121318	6.24472e-106	7.05834e-104	up	ERBB2
	408	ENSG00000198959	2.65134	0.262262	5.01286e-24	8.54854e-23	up	TGM2
	409	ENSG00000259933	2.65116	0.282751	6.83244e-21	1.01112e-19	up	PKD1-AS1
	410	ENSG00000105641	2.6501	0.27664	9.74302e-22	1.4948e-20	up	SLC5A5
	411	ENSG00000156687	2.64417	0.309207	1.21558e-17	1.52172e-16	up	UNC5D
	412	ENSG00000147082	2.64137	0.155618	1.29215e-64	6.73329e-63	up	CCNB3
	414	ENSG00000197712	2.63629	0.267809	7.28284e-23	1.17272e-21	up	FAM114A1
	415	ENSG00000084453	2.63566	0.205232	9.49757e-38	2.61122e-36	up	SLCO1A2
	416	ENSG00000164659	2.62909	0.108192	1.9498e-130	3.14617e-128	up	ELAPOR2
	417	ENSG00000204711	2.62743	0.158962	2.28098e-61	1.10493e-59	up	CFAP95
	418	ENSG00000132122	2.62689	0.23515	5.64539e-29	1.15157e-27	up	SPATA6
	419	ENSG00000164176	2.62439	0.180763	9.26216e-48	3.26858e-46	up	EDIL3
	421	ENSG00000117477	2.60723	0.221689	6.21822e-32	1.41663e-30	up	CCDC181
	422	ENSG00000154040	2.60026	0.111415	1.79855e-120	2.48997e-118	up	CABYR
	423	ENSG00000251151	2.59525	0.233934	1.34196e-28	2.70205e-27	up	HOXC-AS3
	424	ENSG00000115604	2.59303	0.287861	2.09993e-19	2.87658e-18	up	IL18R1
	425	ENSG00000047617	2.59058	0.294883	1.56172e-18	2.04246e-17	up	ANO2
	426	ENSG00000265717	2.59014	0.293533	1.10453e-18	1.45839e-17	up	NA
	427	ENSG00000228340	2.58964	0.299547	5.37241e-18	6.85751e-17	up	MIR646HG
	428	ENSG00000008517	2.58363	0.291779	8.3856e-19	1.11794e-17	up	IL32
	429	ENSG00000054983	2.58183	0.300073	7.69816e-18	9.7517e-17	up	GALC
	430	ENSG00000178860	2.57755	0.309491	8.19856e-17	9.87245e-16	up	MSC
	431	ENSG00000095777	2.57406	0.303542	2.251e-17	2.79103e-16	up	MYO3A
	432	ENSG00000135903	2.57283	0.30961	9.5781e-17	1.14864e-15	up	PAX3
	433	ENSG00000187135	2.57259	0.293057	1.65719e-18	2.16128e-17	up	VSTM2B
	434	ENSG00000067715	2.57233	0.212382	9.14747e-34	2.21786e-32	up	SYT1
	435	ENSG00000237978	2.56753	0.27204	3.79716e-21	5.6871e-20	up	NA
	436	ENSG00000113790	2.5642	0.286559	3.61117e-19	4.88103e-18	up	EHHADH
	437	ENSG00000180667	2.55527	0.146408	3.26363e-68	1.82241e-66	up	YOD1
	438	ENSG00000173809	2.55229	0.243819	1.21199e-25	2.21539e-24	up	TDRD12
	439	ENSG00000151474	2.55024	0.176925	4.21119e-47	1.45969e-45	up	FRMD4A
	440	ENSG00000138772	2.54653	0.281311	1.39914e-19	1.93588e-18	up	ANXA3
	441	ENSG00000174607	2.53916	0.237606	1.17829e-26	2.21612e-25	up	UGT8
	442	ENSG00000196440	2.53349	0.294295	7.39076e-18	9.37244e-17	up	ARMCX4
	443	ENSG00000223608	2.53069	0.298183	2.11965e-17	2.63095e-16	up	NA
	444	ENSG00000134595	2.53066	0.308398	2.28986e-16	2.66945e-15	up	SOX3
	445	ENSG00000151702	2.53043	0.236381	9.65465e-27	1.82611e-25	up	FLI1
	446	ENSG00000274827	2.53	0.297706	1.92356e-17	2.39137e-16	up	NA
	447	ENSG00000133687	2.52847	0.128059	8.93404e-87	7.3602e-85	up	TMTC1
	448	ENSG00000258708	2.52462	0.286138	1.11362e-18	1.46873e-17	up	SLC25A21-AS1
	449	ENSG00000163879	2.52332	0.27783	1.06365e-19	1.48309e-18	up	DNALI1
	450	ENSG00000164627	2.52038	0.25421	3.59821e-23	5.89548e-22	up	KIF6
	451	ENSG00000264575	2.51418	0.287047	1.97371e-18	2.56692e-17	up	NA
	452	ENSG00000213931	2.51311	0.302805	1.04589e-16	1.25042e-15	up	HBE1
	453	ENSG00000140538	2.50753	0.287429	2.68567e-18	3.4774e-17	up	NTRK3
	454	ENSG00000250564	2.50272	0.295238	2.31147e-17	2.86145e-16	up	LINC02999
	455	ENSG00000236117	2.4997	0.297197	4.06793e-17	4.96751e-16	up	LINC01639
	456	ENSG00000062524	2.49881	0.108364	1.18126e-117	1.56146e-115	up	LTK
	457	ENSG00000006283	2.4921	0.252912	6.61265e-23	1.0707e-21	up	CACNA1G
	458	ENSG00000115657	2.48548	0.274439	1.3463e-19	1.86718e-18	up	ABCB6
	459	ENSG00000162931	2.47962	0.289217	1.00317e-17	1.26054e-16	up	TRIM17
	460	ENSG00000121207	2.47944	0.228315	1.79309e-27	3.47869e-26	up	LRAT
	461	ENSG00000120075	2.47802	0.244044	3.1805e-24	5.47163e-23	up	HOXB5
	462	ENSG00000182230	2.4715	0.304797	5.11742e-16	5.87499e-15	up	NA
	463	ENSG00000212747	2.46276	0.140854	1.88176e-68	1.05329e-66	up	RTL8B
	464	ENSG00000188707	2.45914	0.308598	1.60273e-15	1.79165e-14	up	NA
	465	ENSG00000253706	2.45751	0.280996	2.21667e-18	2.8797e-17	up	NA
	466	ENSG00000103710	2.45532	0.293011	5.30947e-17	6.44324e-16	up	RASL12
	467	ENSG00000175445	2.45317	0.182899	5.09819e-41	1.53122e-39	up	LPL
	468	ENSG00000101888	2.44086	0.0490736	0	0	up	NXT2
	469	ENSG00000153246	2.43808	0.292419	7.57837e-17	9.13503e-16	up	PLA2R1
	470	ENSG00000213859	2.43128	0.264727	4.14926e-20	5.89795e-19	up	KCTD11
	471	ENSG00000124920	2.43108	0.134587	6.20899e-73	3.90515e-71	up	MYRF
	472	ENSG00000170927	2.42926	0.243384	1.84204e-23	3.06095e-22	up	PKHD1
	473	ENSG00000166415	2.42679	0.0992874	6.11155e-132	1.02137e-129	up	WDR72
	474	ENSG00000116819	2.41741	0.236833	1.84024e-24	3.21315e-23	up	TFAP2E
	475	ENSG00000170421	2.41717	0.139535	3.14989e-67	1.72595e-65	up	KRT8
	476	ENSG00000213563	2.41058	0.0874128	2.10425e-167	5.65898e-165	up	C8orf82
	477	ENSG00000172985	2.40812	0.201993	9.111e-33	2.13597e-31	up	SH3RF3
	478	ENSG00000204175	2.40807	0.288476	6.96975e-17	8.41007e-16	up	GPRIN2
	479	ENSG00000131409	2.40785	0.236401	2.30267e-24	3.99966e-23	up	LRRC4B
	480	ENSG00000180448	2.40662	0.06765	3.4638e-277	2.53258e-274	up	ARHGAP45
	481	ENSG00000164129	2.40613	0.300762	1.243e-15	1.39887e-14	up	NPY5R
	482	ENSG00000074370	2.40544	0.119187	1.40436e-90	1.20801e-88	up	ATP2A3
	483	ENSG00000245680	2.39941	0.216938	1.95309e-28	3.90901e-27	up	ZNF585B
	484	ENSG00000025708	2.39181	0.161674	1.60161e-49	6.01491e-48	up	TYMP
	485	ENSG00000253661	2.39058	0.270082	8.64935e-19	1.15244e-17	up	ZFHX4-AS1
	486	ENSG00000079308	2.38955	0.199946	6.417e-33	1.51655e-31	up	TNS1
	487	ENSG00000148832	2.38243	0.262951	1.30033e-19	1.80557e-18	up	PAOX
	488	ENSG00000255836	2.37879	0.297621	1.32038e-15	1.48524e-14	up	LOC100419928
	489	ENSG00000161653	2.37635	0.252683	5.2283e-21	7.78158e-20	up	NAGS
	490	ENSG00000167771	2.37546	0.0937344	1.08785e-141	2.15698e-139	up	RCOR2
	491	ENSG00000173546	2.37106	0.240277	5.72774e-23	9.29348e-22	up	CSPG4
	492	ENSG00000004799	2.36614	0.269385	1.58466e-18	2.06899e-17	up	PDK4
	493	ENSG00000235531	2.36498	0.308829	1.89e-14	1.99101e-13	up	MSC-AS1
	495	ENSG00000039068	2.36467	0.228496	4.23631e-25	7.54315e-24	up	CDH1
	496	ENSG00000243587	2.35605	0.270736	3.24971e-18	4.1938e-17	up	NA
	497	ENSG00000186642	2.35428	0.244906	7.04547e-22	1.08735e-20	up	PDE2A
	498	ENSG00000178922	2.34809	0.273956	1.02549e-17	1.2872e-16	up	HYI
	499	ENSG00000260073	2.34542	0.283252	1.22848e-16	1.4605e-15	up	NA
	500	ENSG00000165621	2.34432	0.303537	1.13333e-14	1.21302e-13	up	OXGR1
	502	ENSG00000196604	2.34268	0.291795	9.86577e-16	1.11836e-14	up	POTEF
	503	ENSG00000168140	2.33909	0.305026	1.74029e-14	1.83744e-13	up	VASN
	504	ENSG00000248131	2.3356	0.297976	4.56954e-15	4.97042e-14	up	NA
	505	ENSG00000269113	2.33159	0.265458	1.58787e-18	2.07203e-17	up	TRABD2B
	506	ENSG00000198033	2.32242	0.281542	1.59808e-16	1.88936e-15	up	TUBA3C
	507	ENSG00000267270	2.30781	0.237027	2.10734e-22	3.33595e-21	up	PARD6G-AS1
	508	ENSG00000206052	2.30756	0.284872	5.48002e-16	6.2851e-15	up	DOK6
	509	ENSG00000108821	2.30446	0.0997088	3.51116e-118	4.66765e-116	up	COL1A1
	510	ENSG00000205358	2.30146	0.309636	1.0633e-13	1.07141e-12	up	MT1H
	511	ENSG00000180190	2.29998	0.266417	5.97565e-18	7.59849e-17	up	TDRP
	512	ENSG00000143320	2.2968	0.0958955	9.00688e-127	1.37735e-124	up	CRABP2
	513	ENSG00000072609	2.29276	0.115275	5.01409e-88	4.20483e-86	up	CHFR
	514	ENSG00000147246	2.29002	0.277415	1.52056e-16	1.80135e-15	up	HTR2C
	515	ENSG00000120498	2.28856	0.227304	7.62983e-24	1.29453e-22	up	TEX11
	516	ENSG00000185222	2.2873	0.102114	3.98703e-111	4.93569e-109	up	TCEAL9
	517	ENSG00000077327	2.28342	0.301587	3.69305e-14	3.81654e-13	up	SPAG6
	518	ENSG00000270816	2.27901	0.262245	3.61254e-18	4.65176e-17	up	LINC00221
	519	ENSG00000253304	2.27641	0.151037	2.48102e-51	9.6426e-50	up	TMEM200B
	520	ENSG00000179873	2.27286	0.289758	4.36464e-15	4.75195e-14	up	NLRP11
	521	ENSG00000170430	2.27053	0.164435	2.27885e-43	7.21493e-42	up	MGMT
	522	ENSG00000253305	2.26989	0.267762	2.30523e-17	2.85675e-16	up	PCDHGB6
	524	ENSG00000196220	2.26838	0.175198	2.42772e-38	6.73801e-37	up	SRGAP3
	525	ENSG00000173156	2.26334	0.294084	1.40132e-14	1.48828e-13	up	RHOD
	526	ENSG00000170315	2.26321	0.310273	3.00317e-13	2.93138e-12	up	UBB
	527	ENSG00000054179	2.26126	0.27437	1.69847e-16	2.00399e-15	up	ENTPD2
	528	ENSG00000198142	2.25923	0.0770375	4.78846e-189	1.67217e-186	up	SOWAHC
	529	ENSG00000250986	2.25903	0.299743	4.82542e-14	4.96048e-13	up	NA
	530	ENSG00000138207	2.25744	0.30559	1.50008e-13	1.49796e-12	up	RBP4
	531	ENSG00000185668	2.25641	0.184463	2.08782e-34	5.19668e-33	up	POU3F1
	532	ENSG00000261239	2.25561	0.304132	1.20224e-13	1.20673e-12	up	NA
	533	ENSG00000133169	2.25475	0.303433	1.07944e-13	1.08666e-12	up	BEX1
	534	ENSG00000224689	2.25446	0.305953	1.72354e-13	1.71234e-12	up	NA
	535	ENSG00000019505	2.24398	0.30455	1.72962e-13	1.71765e-12	up	SYT13
	536	ENSG00000010361	2.24271	0.133322	1.69019e-63	8.57817e-62	up	FUZ
	537	ENSG00000235590	2.24023	0.30715	3.01778e-13	2.94318e-12	up	GNAS-AS1
	538	ENSG00000250682	2.23533	0.29418	2.99503e-14	3.11305e-13	up	LINC00491
	539	ENSG00000082556	2.2304	0.302259	1.59333e-13	1.58838e-12	up	OPRK1
	540	ENSG00000159899	2.22663	0.116123	6.01616e-82	4.63027e-80	up	NPR2
	541	ENSG00000171951	2.22626	0.263757	3.15786e-17	3.88253e-16	up	SCG2
	542	ENSG00000171772	2.2261	0.309012	5.84958e-13	5.58167e-12	up	SYCE1
	543	ENSG00000141255	2.22567	0.308657	5.56167e-13	5.31997e-12	up	SPATA22
	544	ENSG00000023892	2.22097	0.303806	2.66167e-13	2.60566e-12	up	DEF6
	545	ENSG00000141934	2.22003	0.296827	7.47771e-14	7.59687e-13	up	PLPP2
	546	ENSG00000188112	2.21826	0.245024	1.38793e-19	1.92263e-18	up	C6orf132
	547	ENSG00000161958	2.21822	0.269087	1.67216e-16	1.97394e-15	up	FGF11
	548	ENSG00000116544	2.2174	0.154371	8.68964e-47	2.9987e-45	up	DLGAP3
	549	ENSG00000197308	2.21456	0.295909	7.21353e-14	7.33485e-13	up	GATA3-AS1
	550	ENSG00000272620	2.20774	0.298321	1.35616e-13	1.35656e-12	up	AFAP1-AS1
	551	ENSG00000049089	2.2076	0.232898	2.57109e-21	3.87102e-20	up	COL9A2
	552	ENSG00000104611	2.20749	0.193829	4.75178e-30	1.004e-28	up	SH2D4A
	553	ENSG00000177551	2.20669	0.194568	8.17504e-30	1.70626e-28	up	NHLH2
	554	ENSG00000068985	2.19924	0.306869	7.68228e-13	7.27701e-12	up	PAGE1
	555	ENSG00000259540	2.19232	0.301838	3.78003e-13	3.65914e-12	up	LOC102723335
	556	ENSG00000122378	2.19043	0.075623	1.80659e-184	6.12591e-182	up	PRXL2A
	557	ENSG00000130635	2.1904	0.306319	8.63242e-13	8.14078e-12	up	COL5A1
	558	ENSG00000007237	2.18907	0.309753	1.58171e-12	1.4587e-11	up	GAS7
	559	ENSG00000215475	2.18514	0.299073	2.74429e-13	2.68541e-12	up	SIAH3
	560	ENSG00000104059	2.18268	0.290118	5.33596e-14	5.47808e-13	up	ENTREP2
	561	ENSG00000109854	2.1794	0.307875	1.45353e-12	1.34367e-11	up	HTATIP2
	562	ENSG00000137962	2.17619	0.189592	1.69536e-30	3.65926e-29	up	ARHGAP29
	563	ENSG00000087253	2.17377	0.141801	4.84377e-53	1.95396e-51	up	LPCAT2
	564	ENSG00000042493	2.17069	0.199087	1.11246e-27	2.1781e-26	up	CAPG
	565	ENSG00000168899	2.17009	0.301272	5.8868e-13	5.61261e-12	up	VAMP5
	566	ENSG00000107859	2.16573	0.293957	1.73873e-13	1.72597e-12	up	PITX3
	567	ENSG00000059915	2.16531	0.2612	1.13376e-16	1.35214e-15	up	PSD
	568	ENSG00000205363	2.16422	0.165391	3.98676e-39	1.13202e-37	up	INSYN1
	569	ENSG00000165443	2.1587	0.281086	1.59256e-14	1.68679e-13	up	PHYHIPL
	570	ENSG00000167880	2.15221	0.309804	3.73114e-12	3.35502e-11	up	EVPL
	571	ENSG00000143195	2.15213	0.15721	1.17234e-42	3.65237e-41	up	ILDR2
	572	ENSG00000182968	2.14911	0.24584	2.29185e-18	2.97572e-17	up	SOX1
	573	ENSG00000139973	2.14772	0.291385	1.69699e-13	1.68668e-12	up	SYT16
	574	ENSG00000229375	2.14751	0.294863	3.26274e-13	3.17547e-12	up	USP24P1
	575	ENSG00000204624	2.14396	0.300361	9.47383e-13	8.89483e-12	up	DISP3
	576	ENSG00000242407	2.14032	0.300311	1.02564e-12	9.59872e-12	up	NA
	577	ENSG00000100228	2.1383	0.219601	2.09217e-22	3.31419e-21	up	RAB36
	578	ENSG00000228903	2.13824	0.289957	1.65185e-13	1.64321e-12	up	NA
	579	ENSG00000171551	2.13449	0.263858	5.98956e-16	6.85941e-15	up	ECEL1
	580	ENSG00000205777	2.1305	0.307538	4.28025e-12	3.81796e-11	up	GAGE1
	581	ENSG00000145423	2.12785	0.264742	9.17407e-16	1.04146e-14	up	SFRP2
	582	ENSG00000152137	2.12769	0.309996	6.71482e-12	5.90182e-11	up	HSPB8
	583	ENSG00000005243	2.12419	0.293311	4.41784e-13	4.24843e-12	up	COPZ2
	584	ENSG00000007314	2.12093	0.305151	3.64212e-12	3.27875e-11	up	SCN4A
	585	ENSG00000221887	2.11769	0.210498	8.26628e-24	1.40048e-22	up	HMSD
	586	ENSG00000185149	2.11729	0.301371	2.13254e-12	1.95513e-11	up	NPY2R
	587	ENSG00000061337	2.11246	0.219703	6.90501e-22	1.06708e-20	up	LZTS1
	588	ENSG00000166831	2.1103	0.0683244	1.8185e-209	8.02783e-207	up	RBPMS2
	589	ENSG00000136274	2.10958	0.202865	2.50811e-25	4.50708e-24	up	NACAD
	590	ENSG00000081853	2.10946	0.268031	3.54081e-15	3.89123e-14	up	PCDHGA2
	591	ENSG00000163462	2.10905	0.289833	3.41886e-13	3.32188e-12	up	TRIM46
	592	ENSG00000229089	2.1076	0.26847	4.1469e-15	4.5212e-14	up	ANKRD20A8P
	593	ENSG00000224271	2.10439	0.304315	4.67236e-12	4.15504e-11	up	EPIC1
	594	ENSG00000225280	2.10412	0.277756	3.57964e-14	3.70096e-13	up	LOC105372558
	595	ENSG00000172575	2.10055	0.137284	7.56284e-53	3.02993e-51	up	RASGRP1
	596	ENSG00000270574	2.09811	0.301331	3.3354e-12	3.0154e-11	up	NA
	597	ENSG00000028137	2.09265	0.229086	6.55413e-20	9.24333e-19	up	TNFRSF1B
	598	ENSG00000234722	2.09253	0.304954	6.80077e-12	5.97288e-11	up	LINC01287
	599	ENSG00000164695	2.09064	0.167964	1.45257e-35	3.75949e-34	up	CHMP4C
	600	ENSG00000183196	2.08851	0.128055	8.45515e-60	3.94861e-58	up	CHST6
	601	ENSG00000172901	2.08723	0.291066	7.44498e-13	7.06368e-12	up	LVRN
	602	ENSG00000183833	2.08288	0.306402	1.06188e-11	9.22566e-11	up	CFAP91
	603	ENSG00000269834	2.08171	0.30322	6.63413e-12	5.83969e-11	up	ZNF528-AS1
	604	ENSG00000120820	2.07983	0.272543	2.32541e-14	2.43217e-13	up	GLT8D2
	605	ENSG00000076864	2.07721	0.155718	1.36245e-40	4.05049e-39	up	RAP1GAP
	606	ENSG00000135519	2.07694	0.19137	1.92898e-27	3.73612e-26	up	KCNH3
	607	ENSG00000187621	2.07525	0.301127	5.5162e-12	4.88318e-11	up	LOC124903372
	608	ENSG00000225439	2.07394	0.124431	2.26596e-62	1.12323e-60	up	BOLA3-DT
	609	ENSG00000276547	2.07217	0.298458	3.84104e-12	3.44325e-11	up	PCDHGB5
	610	ENSG00000182378	2.06872	0.0593853	7.02339e-266	4.69504e-263	up	PLCXD1
	611	ENSG00000169515	2.06841	0.308792	2.10725e-11	1.78571e-10	up	CCDC8
	612	ENSG00000272046	2.06817	0.275858	6.51865e-14	6.66012e-13	up	NA
	614	ENSG00000170162	2.06221	0.256921	1.00191e-15	1.13464e-14	up	VGLL2
	615	ENSG00000131203	2.05865	0.284076	4.26633e-13	4.10779e-12	up	IDO1
	616	ENSG00000214888	2.05703	0.294994	3.09985e-12	2.80787e-11	up	NA
	617	ENSG00000163618	2.05144	0.21741	3.87925e-21	5.79954e-20	up	CADPS
	618	ENSG00000170689	2.04954	0.102157	1.56311e-89	1.33475e-87	up	HOXB9
	619	ENSG00000135740	2.04259	0.256108	1.5176e-15	1.6981e-14	up	SLC9A5
	620	ENSG00000111249	2.04178	0.169184	1.55037e-33	3.72806e-32	up	CUX2
	621	ENSG00000134533	2.04172	0.211702	5.19664e-22	8.08415e-21	up	RERG
	622	ENSG00000151338	2.03828	0.310311	5.08268e-11	4.19321e-10	up	MIPOL1
	623	ENSG00000080823	2.03344	0.128913	4.71736e-56	2.04772e-54	up	MOK
	624	ENSG00000137727	2.03263	0.277626	2.45276e-13	2.40416e-12	up	ARHGAP20
	625	ENSG00000249803	2.03236	0.308465	4.43895e-11	3.6712e-10	up	LOC124901076
	626	ENSG00000100206	2.03058	0.194733	1.85674e-25	3.37022e-24	up	DMC1
	627	ENSG00000169548	2.02966	0.305094	2.87999e-11	2.41517e-10	up	ZNF280A
	628	ENSG00000121316	2.02779	0.305336	3.11154e-11	2.60468e-10	up	PLBD1
	629	ENSG00000168748	2.02766	0.287018	1.61114e-12	1.48467e-11	up	CA7
	630	ENSG00000235314	2.02666	0.302395	2.05569e-11	1.74264e-10	up	NA
	631	ENSG00000136010	2.02488	0.307113	4.30289e-11	3.56244e-10	up	ALDH1L2
	632	ENSG00000244649	2.0201	0.298041	1.21928e-11	1.05345e-10	up	NA
	633	ENSG00000233695	2.00322	0.229915	2.96246e-18	3.82732e-17	up	NA
	634	ENSG00000162849	2.00218	0.243675	2.09336e-16	2.44525e-15	up	KIF26B
	635	ENSG00000076662	2.0018	0.254698	3.85729e-15	4.22712e-14	up	ICAM3
	636	ENSG00000170743	1.9995	0.2999	2.60667e-11	2.19699e-10	up	SYT9
	637	ENSG00000182218	1.99936	0.306645	7.02609e-11	5.73785e-10	up	HHIPL1
	638	ENSG00000248837	1.99902	0.243164	2.02016e-16	2.36565e-15	up	LOC105374524
	639	ENSG00000058453	1.99902	0.0943916	1.52721e-99	1.56036e-97	up	CROCC
	640	ENSG00000075886	1.99597	0.308509	9.8192e-11	7.93575e-10	up	TUBA3D
	641	ENSG00000139915	1.9951	0.294693	1.2869e-11	1.10982e-10	up	MDGA2
	642	ENSG00000213366	1.99482	0.190207	9.84763e-26	1.80852e-24	up	GSTM2
	643	ENSG00000269964	1.98887	0.285304	3.1454e-12	2.84803e-11	up	MEI4
	644	ENSG00000112796	1.98808	0.28052	1.36907e-12	1.2681e-11	up	ENPP5
	645	ENSG00000124440	1.98671	0.309259	1.3264e-10	1.06062e-09	up	HIF3A
	646	ENSG00000052850	1.98652	0.0888225	8.62461e-111	1.05649e-108	up	ALX4
	647	ENSG00000198353	1.98507	0.206161	6.04628e-22	9.35614e-21	up	HOXC4
	648	ENSG00000183091	1.98242	0.194462	2.10105e-24	3.66034e-23	up	NEB
	649	ENSG00000217950	1.97755	0.269345	2.10273e-13	2.06799e-12	up	NA
	650	ENSG00000224778	1.97671	0.295439	2.21988e-11	1.87775e-10	up	NA
	651	ENSG00000103647	1.97401	0.217494	1.12487e-19	1.56658e-18	up	CORO2B
	652	ENSG00000163958	1.974	0.305754	1.07372e-10	8.65673e-10	up	ZDHHC19
	653	ENSG00000123360	1.97309	0.199871	5.51658e-23	8.96329e-22	up	PDE1B
	654	ENSG00000240108	1.97084	0.301049	5.88712e-11	4.82794e-10	up	NA
	655	ENSG00000225548	1.96946	0.294028	2.10964e-11	1.78647e-10	up	LINC01980
	656	ENSG00000275832	1.96884	0.237797	1.23697e-16	1.46985e-15	up	ARHGAP23
	657	ENSG00000182583	1.96417	0.296014	3.23612e-11	2.70509e-10	up	VCX
	658	ENSG00000125816	1.9609	0.132565	1.64985e-49	6.18614e-48	up	NKX2-4
	659	ENSG00000095637	1.9608	0.176748	1.34561e-28	2.70707e-27	up	SORBS1
	660	ENSG00000229970	1.95902	0.268287	2.83609e-13	2.77176e-12	up	NA
	661	ENSG00000166126	1.95773	0.306447	1.67536e-10	1.32499e-09	up	AMN
	662	ENSG00000258590	1.95572	0.290412	1.64748e-11	1.40782e-10	up	NA
	663	ENSG00000022556	1.95471	0.214106	6.87164e-20	9.66782e-19	up	NLRP2
	664	ENSG00000270823	1.95457	0.302756	1.07554e-10	8.66546e-10	up	NA
	665	ENSG00000116983	1.94888	0.174286	4.98969e-29	1.02049e-27	up	HPCAL4
	666	ENSG00000263155	1.94729	0.310098	3.39416e-10	2.62263e-09	up	MYZAP
	667	ENSG00000105996	1.94551	0.235644	1.5046e-16	1.78334e-15	up	HOXA2
	668	ENSG00000117266	1.94396	0.144401	2.60767e-41	7.87247e-40	up	CDK18
	669	ENSG00000197935	1.93824	0.300819	1.16966e-10	9.39786e-10	up	ZNF311
	670	ENSG00000231431	1.9327	0.290406	2.82988e-11	2.37399e-10	up	FAR2P4
	671	ENSG00000186235	1.92682	0.301742	1.70678e-10	1.34865e-09	up	LINC02610
	672	ENSG00000170561	1.92173	0.104258	7.20756e-76	4.90219e-74	up	IRX2
	673	ENSG00000270038	1.92117	0.303458	2.43706e-10	1.9032e-09	up	NA
	674	ENSG00000249896	1.91945	0.303694	2.60976e-10	2.03332e-09	up	NA
	675	ENSG00000247498	1.91878	0.304113	2.80069e-10	2.177e-09	up	GPRC5D-AS1
	676	ENSG00000268357	1.91431	0.307599	4.86499e-10	3.70287e-09	up	NA
	677	ENSG00000249196	1.91339	0.309907	6.6551e-10	5.01157e-09	up	TMEM132D-AS1
	678	ENSG00000140859	1.9085	0.156821	4.49758e-34	1.10188e-32	up	KIFC3
	679	ENSG00000072952	1.90738	0.304975	3.99541e-10	3.06997e-09	up	IRAG1
	680	ENSG00000215612	1.90694	0.290155	4.96043e-11	4.09525e-10	up	HMX1
	681	ENSG00000133110	1.90636	0.299591	1.97575e-10	1.5528e-09	up	POSTN
	682	ENSG00000165474	1.90629	0.157422	9.41375e-34	2.28006e-32	up	GJB2
	683	ENSG00000143340	1.9041	0.24462	7.03026e-15	7.59404e-14	up	FAM163A
	684	ENSG00000198300	1.90356	0.275845	5.16981e-12	4.58522e-11	up	PEG3
	685	ENSG00000177138	1.89981	0.305348	4.91507e-10	3.73733e-09	up	FAM9B
	686	ENSG00000260896	1.89957	0.306399	5.65765e-10	4.28111e-09	up	ARLNC1
	687	ENSG00000166257	1.89859	0.249689	2.87535e-14	2.98998e-13	up	SCN3B
	688	ENSG00000135929	1.8978	0.294487	1.16035e-10	9.32629e-10	up	CYP27A1
	689	ENSG00000075399	1.89178	0.194443	2.26305e-22	3.57278e-21	up	VPS9D1
	690	ENSG00000075643	1.89106	0.133225	9.90456e-46	3.29172e-44	up	MOCOS
	691	ENSG00000233515	1.88983	0.307172	7.63397e-10	5.71741e-09	up	LINC01518
	692	ENSG00000138028	1.88632	0.194901	3.72576e-22	5.82698e-21	up	CGREF1
	693	ENSG00000105997	1.8848	0.153855	1.67028e-34	4.17964e-33	up	HOXA3
	694	ENSG00000113231	1.88355	0.254437	1.33324e-13	1.33478e-12	up	PDE8B
	695	ENSG00000162755	1.88163	0.308067	1.0098e-09	7.48612e-09	up	KLHDC9
	696	ENSG00000120708	1.88137	0.308749	1.10451e-09	8.15469e-09	up	TGFBI
	697	ENSG00000165959	1.88077	0.151527	2.24792e-35	5.78599e-34	up	CLMN
	698	ENSG00000158089	1.87881	0.111092	3.65715e-64	1.87235e-62	up	GALNT14
	699	ENSG00000197322	1.87495	0.310006	1.46541e-09	1.07178e-08	up	TMEM132E-DT
	700	ENSG00000186838	1.87409	0.286951	6.53013e-11	5.34402e-10	up	SELENOV
	701	ENSG00000102678	1.87294	0.262337	9.37037e-13	8.80476e-12	up	FGF9
	702	ENSG00000124615	1.87262	0.118861	6.38217e-56	2.75505e-54	up	MOCS1
	703	ENSG00000178386	1.87221	0.308473	1.28479e-09	9.43216e-09	up	ZNF223
	704	ENSG00000116016	1.87141	0.247802	4.28545e-14	4.42093e-13	up	EPAS1
	705	ENSG00000198892	1.87071	0.299438	4.17332e-10	3.20247e-09	up	SHISA4
	706	ENSG00000255624	1.86922	0.305269	9.1717e-10	6.82105e-09	up	NA
	707	ENSG00000227036	1.86915	0.297529	3.33715e-10	2.58028e-09	up	LINC00511
	708	ENSG00000265417	1.86848	0.302565	6.59607e-10	4.96871e-09	up	LOC100129774
	709	ENSG00000249641	1.86598	0.294355	2.30928e-10	1.80462e-09	up	HOXC13-AS
	710	ENSG00000184363	1.86396	0.309658	1.75037e-09	1.27248e-08	up	PKP3
	711	ENSG00000268912	1.86255	0.2993	4.87646e-10	3.70918e-09	up	NA
	712	ENSG00000176658	1.8596	0.10527	7.79587e-70	4.58291e-68	up	MYO1D
	713	ENSG00000182759	1.85958	0.216819	9.76707e-18	1.2286e-16	up	MAFA
	714	ENSG00000123612	1.8588	0.191493	2.81794e-22	4.42492e-21	up	ACVR1C
	715	ENSG00000101017	1.85743	0.261265	1.16585e-12	1.08545e-11	up	CD40
	716	ENSG00000182109	1.85361	0.26317	1.87618e-12	1.72551e-11	up	NA
	717	ENSG00000241721	1.85208	0.305676	1.3701e-09	1.00427e-08	up	NA
	718	ENSG00000085117	1.84915	0.195926	3.79918e-21	5.6871e-20	up	CD82
	719	ENSG00000111424	1.84871	0.161299	2.06243e-30	4.42298e-29	up	VDR
	720	ENSG00000128408	1.84723	0.305509	1.48108e-09	1.08256e-08	up	RIBC2
	721	ENSG00000270277	1.84621	0.30312	1.12433e-09	8.29056e-09	up	NA
	722	ENSG00000132321	1.84387	0.297344	5.60626e-10	4.24635e-09	up	IQCA1
	723	ENSG00000006611	1.84292	0.304778	1.47779e-09	1.08049e-08	up	USH1C
	724	ENSG00000005884	1.84242	0.15752	1.32921e-31	2.99034e-30	up	ITGA3
	725	ENSG00000186777	1.84217	0.276931	2.88935e-11	2.42215e-10	up	ZNF732
	726	ENSG00000233836	1.84115	0.310275	2.95766e-09	2.10784e-08	up	NA
	727	ENSG00000160190	1.8409	0.20169	7.01821e-20	9.85624e-19	up	SLC37A1
	728	ENSG00000228554	1.83967	0.310035	2.96099e-09	2.10859e-08	up	NA
	729	ENSG00000001617	1.83894	0.141053	7.51469e-39	2.12088e-37	up	SEMA3F
	730	ENSG00000248538	1.8357	0.310299	3.30066e-09	2.3423e-08	up	LOC157273
	731	ENSG00000164938	1.8343	0.2799	5.62439e-11	4.62057e-10	up	TP53INP1
	732	ENSG00000043143	1.8342	0.0690163	1.27385e-155	3.01054e-153	up	JADE2
	733	ENSG00000180818	1.83315	0.073347	7.31144e-138	1.33645e-135	up	HOXC10
	734	ENSG00000105270	1.83176	0.266535	6.30834e-12	5.55499e-11	up	CLIP3
	735	ENSG00000111344	1.83083	0.252177	3.86805e-13	3.7397e-12	up	RASAL1
	736	ENSG00000148053	1.82729	0.310421	3.94511e-09	2.77605e-08	up	NTRK2
	737	ENSG00000103852	1.82593	0.126339	2.4141e-47	8.44285e-46	up	TTC23
	738	ENSG00000145832	1.82574	0.182132	1.19238e-23	1.997e-22	up	SLC25A48
	739	ENSG00000226674	1.8255	0.310031	3.90618e-09	2.75114e-08	up	TEX41
	740	ENSG00000140945	1.82384	0.309571	3.82669e-09	2.70003e-08	up	CDH13
	741	ENSG00000280356	1.82347	0.308464	3.39079e-09	2.40262e-08	up	NA
	742	ENSG00000119938	1.82274	0.249204	2.58801e-13	2.53566e-12	up	PPP1R3C
	743	ENSG00000179627	1.82263	0.158261	1.08838e-30	2.36442e-29	up	ZBTB42
	744	ENSG00000138161	1.82117	0.306378	2.77798e-09	1.98523e-08	up	CUZD1
	745	ENSG00000164128	1.81882	0.138376	1.84124e-39	5.27288e-38	up	NPY1R
	746	ENSG00000251226	1.81825	0.308796	3.90464e-09	2.75089e-08	up	LINC02714
	747	ENSG00000258525	1.81791	0.26397	5.70632e-12	5.04385e-11	up	LOC100506071
	749	ENSG00000204717	1.81587	0.300861	1.58385e-09	1.15516e-08	up	NA
	750	ENSG00000253363	1.81548	0.308913	4.17774e-09	2.93533e-08	up	LOC124906685
	751	ENSG00000159184	1.81206	0.0876243	5.25299e-95	4.89658e-93	up	HOXB13
	752	ENSG00000187268	1.80969	0.297439	1.17042e-09	8.62223e-09	up	FAM9C
	753	ENSG00000166105	1.80874	0.16162	4.49831e-29	9.20795e-28	up	GLB1L3
	754	ENSG00000188219	1.80687	0.30468	3.02236e-09	2.14937e-08	up	POTEE
	755	ENSG00000268902	1.80129	0.30986	6.12785e-09	4.23305e-08	up	CSAG3
	756	ENSG00000065361	1.79954	0.118947	1.04258e-51	4.0997e-50	up	ERBB3
	757	ENSG00000231976	1.79754	0.3071	4.81991e-09	3.36631e-08	up	NA
	758	ENSG00000124126	1.7959	0.109806	3.99366e-60	1.8763e-58	up	PREX1
	759	ENSG00000183317	1.79306	0.266661	1.76681e-11	1.50539e-10	up	EPHA10
	760	ENSG00000183914	1.79276	0.309592	7.00838e-09	4.80866e-08	up	DNAH2
	761	ENSG00000250486	1.79225	0.303798	3.64644e-09	2.5783e-08	up	FAM218A
	762	ENSG00000259803	1.78417	0.260034	6.82476e-12	5.9917e-11	up	SLC22A31
	763	ENSG00000070601	1.78337	0.223499	1.47155e-15	1.64894e-14	up	FRMPD1
	764	ENSG00000175063	1.78187	0.277317	1.31543e-10	1.05293e-09	up	UBE2C
	765	ENSG00000214429	1.77852	0.285447	4.64511e-10	3.54474e-09	up	NA
	766	ENSG00000077935	1.77613	0.305334	5.99107e-09	4.14101e-08	up	SMC1B
	767	ENSG00000260289	1.77507	0.310058	1.03457e-08	6.97976e-08	up	NA
	768	ENSG00000219438	1.77315	0.246458	6.26793e-13	5.97113e-12	up	TAFA5
	769	ENSG00000257636	1.77239	0.292874	1.43314e-09	1.04949e-08	up	G2E3-AS1
	770	ENSG00000140403	1.77204	0.287704	7.30977e-10	5.48511e-09	up	DNAJA4
	771	ENSG00000175600	1.77155	0.13986	9.05364e-37	2.42922e-35	up	SUGCT
	772	ENSG00000126947	1.76755	0.310182	1.20926e-08	8.11151e-08	up	ARMCX1
	773	ENSG00000250786	1.75754	0.255187	5.68802e-12	5.02958e-11	up	SNHG18
	774	ENSG00000159167	1.75539	0.31039	1.55445e-08	1.03205e-07	up	STC1
	775	ENSG00000264956	1.75373	0.303501	7.54358e-09	5.15923e-08	up	LOC105371597
	776	ENSG00000205002	1.75214	0.308394	1.33533e-08	8.92139e-08	up	AARD
	777	ENSG00000113722	1.74992	0.307909	1.32184e-08	8.83376e-08	up	CDX1
	778	ENSG00000237594	1.74611	0.292485	2.3738e-09	1.70472e-08	up	TIAM1-AS1
	779	ENSG00000116852	1.74162	0.141078	5.17383e-35	1.32009e-33	up	KIF21B
	780	ENSG00000204060	1.74085	0.230359	4.12036e-14	4.2525e-13	up	FOXO6
	781	ENSG00000127124	1.73864	0.191703	1.19608e-19	1.66278e-18	up	HIVEP3
	782	ENSG00000175874	1.73355	0.301222	8.66091e-09	5.88555e-08	up	CREG2
	783	ENSG00000105639	1.73243	0.303319	1.11949e-08	7.52882e-08	up	JAK3
	784	ENSG00000162576	1.73005	0.14142	2.06144e-34	5.14195e-33	up	MXRA8
	785	ENSG00000214140	1.7265	0.308917	2.28525e-08	1.4931e-07	up	PRCD
	786	ENSG00000117643	1.72597	0.13988	5.58988e-35	1.42469e-33	up	MAN1C1
	787	ENSG00000145721	1.72515	0.302507	1.17833e-08	7.91317e-08	up	LIX1
	788	ENSG00000214617	1.72482	0.298104	7.21056e-09	4.94013e-08	up	NA
	789	ENSG00000159307	1.72462	0.255026	1.35626e-11	1.16621e-10	up	SCUBE1
	790	ENSG00000164398	1.72352	0.184737	1.0631e-20	1.55848e-19	up	ACSL6
	791	ENSG00000180801	1.72132	0.190657	1.74286e-19	2.39869e-18	up	ARSJ
	792	ENSG00000173175	1.72108	0.280447	8.41306e-10	6.2708e-09	up	ADCY5
	793	ENSG00000236924	1.71822	0.30817	2.46738e-08	1.60806e-07	up	NA
	794	ENSG00000115138	1.71818	0.310006	2.98332e-08	1.93354e-07	up	POMC
	795	ENSG00000132975	1.71751	0.299125	9.36953e-09	6.34314e-08	up	GPR12
	796	ENSG00000118898	1.71568	0.201656	1.77027e-17	2.20431e-16	up	PPL
	797	ENSG00000117407	1.71356	0.308103	2.67255e-08	1.73645e-07	up	ARTN
	798	ENSG00000106236	1.71238	0.143619	8.97658e-33	2.10657e-31	up	NPTX2
	799	ENSG00000187608	1.71167	0.139102	8.49578e-35	2.15125e-33	up	ISG15
	800	ENSG00000103489	1.71126	0.310125	3.42928e-08	2.21093e-07	up	XYLT1
	801	ENSG00000133816	1.70828	0.118332	3.05431e-47	1.065e-45	up	MICAL2
	802	ENSG00000119865	1.70817	0.169095	5.41977e-24	9.22228e-23	up	CNRIP1
	803	ENSG00000143416	1.70623	0.310261	3.81198e-08	2.4489e-07	up	SELENBP1
	804	ENSG00000196345	1.70522	0.304335	2.10529e-08	1.37783e-07	up	ZKSCAN7
	805	ENSG00000243279	1.70509	0.232013	1.99523e-13	1.96806e-12	up	PRAF2
	806	ENSG00000132031	1.70209	0.29033	4.55668e-09	3.18913e-08	up	MATN3
	807	ENSG00000223760	1.70197	0.309155	3.68707e-08	2.37191e-07	up	NA
	808	ENSG00000186417	1.70049	0.301567	1.71214e-08	1.13129e-07	up	GLDN
	809	ENSG00000213225	1.69844	0.170492	2.23508e-23	3.69831e-22	up	NOC2LP1
	810	ENSG00000280002	1.69455	0.308584	3.98818e-08	2.55788e-07	up	NA
	811	ENSG00000101898	1.69026	0.298111	1.42883e-08	9.50263e-08	up	MCTS2
	812	ENSG00000170379	1.68802	0.305275	3.21137e-08	2.07616e-07	up	TCAF2
	813	ENSG00000258240	1.68723	0.309781	5.13611e-08	3.25928e-07	up	LINC01404
	814	ENSG00000177875	1.6848	0.214226	3.70318e-15	4.06585e-14	up	CCDC184
	815	ENSG00000112309	1.68419	0.190608	9.92709e-19	1.31818e-17	up	B3GAT2
	816	ENSG00000160145	1.68419	0.175887	1.01465e-21	1.55466e-20	up	KALRN
	817	ENSG00000175707	1.68047	0.309671	5.74229e-08	3.62919e-07	up	KDF1
	818	ENSG00000251026	1.67971	0.280405	2.0946e-09	1.51211e-08	up	NA
	819	ENSG00000142552	1.67607	0.0933362	4.20432e-72	2.60234e-70	up	RCN3
	820	ENSG00000027075	1.67507	0.145681	1.34703e-30	2.92361e-29	up	PRKCH
	821	ENSG00000228549	1.67418	0.307111	4.99775e-08	3.17579e-07	up	LINC03126
	822	ENSG00000105825	1.67417	0.174471	8.33949e-22	1.28283e-20	up	TFPI2
	823	ENSG00000267327	1.67371	0.309099	6.13571e-08	3.86218e-07	up	NA
	824	ENSG00000147100	1.67314	0.0890064	7.84497e-79	5.63033e-77	up	SLC16A2
	825	ENSG00000215452	1.67192	0.30573	4.53512e-08	2.8936e-07	up	NA
	826	ENSG00000129244	1.67181	0.19835	3.49833e-17	4.28536e-16	up	ATP1B2
	827	ENSG00000266524	1.67134	0.310376	7.24918e-08	4.53379e-07	up	GDF10
	828	ENSG00000268686	1.67021	0.309912	7.07274e-08	4.42936e-07	up	LOC101928295
	829	ENSG00000178187	1.66751	0.304706	4.43702e-08	2.83332e-07	up	ZNF454
	830	ENSG00000111679	1.66686	0.310785	8.16773e-08	5.0784e-07	up	PTPN6
	831	ENSG00000128917	1.66582	0.284056	4.50726e-09	3.15643e-08	up	DLL4
	832	ENSG00000273588	1.66399	0.309638	7.70073e-08	4.79952e-07	up	NA
	833	ENSG00000124134	1.66311	0.308051	6.70837e-08	4.21358e-07	up	KCNS1
	834	ENSG00000237172	1.66248	0.26112	1.93115e-10	1.51927e-09	up	B3GNT9
	835	ENSG00000158856	1.66104	0.155788	1.52916e-26	2.86821e-25	up	DMTN
	836	ENSG00000163689	1.65955	0.157547	6.04114e-26	1.11647e-24	up	CFAP20DC
	837	ENSG00000144229	1.65954	0.150903	3.93347e-28	7.80588e-27	up	THSD7B
	838	ENSG00000117971	1.6585	0.269992	8.1086e-10	6.05544e-09	up	CHRNB4
	839	ENSG00000171649	1.65838	0.111266	3.0747e-50	1.17355e-48	up	ZIK1
	840	ENSG00000148344	1.65796	0.193813	1.18442e-17	1.4835e-16	up	PTGES
	841	ENSG00000167800	1.65761	0.304318	5.12354e-08	3.25218e-07	up	TBX10
	842	ENSG00000101004	1.65716	0.134861	1.0524e-34	2.6562e-33	up	NINL
	843	ENSG00000182256	1.65708	0.297934	2.66855e-08	1.73434e-07	up	GABRG3
	844	ENSG00000162676	1.65212	0.184484	3.38631e-19	4.59035e-18	up	GFI1
	845	ENSG00000121742	1.64997	0.183509	2.44475e-19	3.32944e-18	up	GJB6
	846	ENSG00000115963	1.64901	0.106092	1.76857e-54	7.34976e-53	up	RND3
	847	ENSG00000264067	1.649	0.30436	6.02955e-08	3.80047e-07	up	NA
	848	ENSG00000257582	1.64857	0.307735	8.45582e-08	5.24916e-07	up	LINC01475
	849	ENSG00000257135	1.64776	0.282196	5.24957e-09	3.65875e-08	up	NA
	850	ENSG00000274286	1.64759	0.273912	1.79846e-09	1.30557e-08	up	ADRA2B
	851	ENSG00000259834	1.64743	0.309147	9.87766e-08	6.09622e-07	up	NA
	852	ENSG00000150054	1.64712	0.11725	7.92692e-45	2.58309e-43	up	MPP7
	853	ENSG00000197153	1.6459	0.259384	2.21782e-10	1.73604e-09	up	H3C12
	854	ENSG00000138356	1.64561	0.30055	4.36689e-08	2.79159e-07	up	AOX1
	855	ENSG00000162373	1.64372	0.231181	1.15963e-12	1.08052e-11	up	BEND5
	856	ENSG00000036672	1.64205	0.109395	6.29168e-51	2.42915e-49	up	USP2
	857	ENSG00000125775	1.64058	0.256631	1.62918e-10	1.2917e-09	up	SDCBP2
	858	ENSG00000216775	1.63954	0.118295	1.10942e-43	3.5412e-42	up	NA
	859	ENSG00000161642	1.63905	0.110068	3.75739e-50	1.43179e-48	up	ZNF385A
	860	ENSG00000118508	1.63838	0.12953	1.13882e-36	3.04863e-35	up	RAB32
	861	ENSG00000021300	1.63833	0.258089	2.18233e-10	1.70941e-09	up	PLEKHB1
	862	ENSG00000166405	1.63614	0.301941	6.00203e-08	3.78618e-07	up	RIC3
	863	ENSG00000133124	1.63586	0.25873	2.57117e-10	2.00392e-09	up	IRS4
	864	ENSG00000011347	1.63274	0.125533	1.124e-38	3.1495e-37	up	SYT7
	865	ENSG00000136048	1.63145	0.106457	5.20651e-53	2.09667e-51	up	DRAM1
	866	ENSG00000167733	1.63051	0.176249	2.22124e-20	3.19817e-19	up	HSD11B1L
	867	ENSG00000168477	1.62978	0.305691	9.7434e-08	6.02289e-07	up	TNXB
	868	ENSG00000253159	1.62895	0.288904	1.71675e-08	1.13402e-07	up	PCDHGA12
	869	ENSG00000176399	1.6289	0.175661	1.81068e-20	2.62157e-19	up	DMRTA1
	870	ENSG00000176988	1.62805	0.305422	9.79379e-08	6.05084e-07	up	FMR1NB
	871	ENSG00000169750	1.62739	0.062046	1.24777e-151	2.86216e-149	up	RAC3
	872	ENSG00000197465	1.62376	0.307483	1.28597e-07	7.85376e-07	up	GYPE
	873	ENSG00000118640	1.62338	0.277242	4.75622e-09	3.32282e-08	up	VAMP8
	874	ENSG00000137699	1.61973	0.304011	9.93621e-08	6.13073e-07	up	TRIM29
	875	ENSG00000256806	1.61869	0.300595	7.24586e-08	4.53293e-07	up	C17orf100
	876	ENSG00000090539	1.61864	0.171251	3.32883e-21	4.98941e-20	up	CHRD
	877	ENSG00000150722	1.61745	0.278429	6.27695e-09	4.33093e-08	up	PPP1R1C
	878	ENSG00000080644	1.61741	0.168668	8.86536e-22	1.36283e-20	up	CHRNA3
	879	ENSG00000175274	1.61677	0.110319	1.24307e-48	4.54441e-47	up	TP53I11
	880	ENSG00000154134	1.61647	0.163424	4.54375e-23	7.42389e-22	up	ROBO3
	881	ENSG00000188338	1.61597	0.243221	3.05254e-11	2.55712e-10	up	SLC38A3
	882	ENSG00000177106	1.61476	0.173478	1.30032e-20	1.89792e-19	up	EPS8L2
	883	ENSG00000138311	1.61456	0.222508	3.98145e-13	3.84141e-12	up	ZNF365
	884	ENSG00000166446	1.61438	0.246658	5.94988e-11	4.87599e-10	up	CDYL2
	885	ENSG00000171169	1.61362	0.0976932	2.7572e-61	1.33286e-59	up	NAIF1
	886	ENSG00000125637	1.61304	0.308718	1.74195e-07	1.04772e-06	up	PSD4
	887	ENSG00000254349	1.61243	0.305455	1.30037e-07	7.93756e-07	up	MIR2052HG
	888	ENSG00000119630	1.61196	0.162206	2.85124e-23	4.70123e-22	up	PGF
	889	ENSG00000256633	1.61194	0.30891	1.80711e-07	1.08468e-06	up	NA
	890	ENSG00000152969	1.61166	0.310204	2.04164e-07	1.21672e-06	up	JAKMIP1
	891	ENSG00000163817	1.61066	0.308776	1.82566e-07	1.09385e-06	up	SLC6A20
	892	ENSG00000213185	1.60881	0.308359	1.81518e-07	1.08869e-06	up	FAM24B
	893	ENSG00000206535	1.6064	0.140125	1.99908e-30	4.29106e-29	up	LNP1
	894	ENSG00000226141	1.60585	0.310079	2.23262e-07	1.32547e-06	up	NA
	895	ENSG00000175352	1.60519	0.111221	3.23505e-47	1.12635e-45	up	NRIP3
	896	ENSG00000137094	1.60257	0.144607	1.53049e-28	3.07109e-27	up	DNAJB5
	897	ENSG00000144596	1.60051	0.287339	2.54557e-08	1.65754e-07	up	GRIP2
	898	ENSG00000224189	1.6002	0.174044	3.77687e-20	5.38169e-19	up	HAGLR
	899	ENSG00000270641	1.59985	0.305342	1.60986e-07	9.72778e-07	up	TSIX
	900	ENSG00000197587	1.59759	0.176878	1.68346e-19	2.31967e-18	up	DMBX1
	901	ENSG00000141738	1.59417	0.310445	2.81986e-07	1.65686e-06	up	GRB7
	902	ENSG00000273388	1.59394	0.306825	2.04788e-07	1.21982e-06	up	NA
	903	ENSG00000177685	1.59335	0.170404	8.731e-21	1.28478e-19	up	CRACR2B
	904	ENSG00000160219	1.59206	0.206548	1.27884e-14	1.36315e-13	up	GAB3
	905	ENSG00000134202	1.59117	0.136996	3.46987e-31	7.68792e-30	up	GSTM3
	906	ENSG00000133636	1.59014	0.309476	2.7743e-07	1.63288e-06	up	NTS
	907	ENSG00000152527	1.58988	0.188002	2.7496e-17	3.39306e-16	up	PLEKHH2
	908	ENSG00000175879	1.58904	0.131816	1.82442e-33	4.37804e-32	up	HOXD8
	909	ENSG00000104848	1.58717	0.310461	3.18244e-07	1.8587e-06	up	KCNA7
	910	ENSG00000146910	1.58684	0.174942	1.18292e-19	1.64547e-18	up	CNPY1
	911	ENSG00000140015	1.5863	0.215598	1.87169e-13	1.85088e-12	up	KCNH5
	912	ENSG00000162482	1.58365	0.272734	6.37642e-09	4.39696e-08	up	AKR7A3
	913	ENSG00000185507	1.58184	0.184235	9.00622e-18	1.13534e-16	up	IRF7
	914	ENSG00000104419	1.5818	0.227827	3.83848e-12	3.44325e-11	up	NDRG1
	915	ENSG00000266885	1.58142	0.302583	1.72839e-07	1.04051e-06	up	NA
	916	ENSG00000214719	1.57928	0.284181	2.73949e-08	1.77896e-07	up	NA
	917	ENSG00000142319	1.57833	0.227067	3.62926e-12	3.26968e-11	up	SLC6A3
	918	ENSG00000156150	1.57719	0.307128	2.81718e-07	1.65592e-06	up	ALX3
	919	ENSG00000155657	1.57384	0.280677	2.05521e-08	1.34657e-07	up	TTN
	920	ENSG00000087258	1.57332	0.0978583	3.66819e-58	1.64731e-56	up	GNAO1
	921	ENSG00000112238	1.57304	0.308403	3.38611e-07	1.97295e-06	up	PRDM13
	922	ENSG00000261659	1.5727	0.273482	8.88932e-09	6.03726e-08	up	NA
	923	ENSG00000162374	1.56891	0.310403	4.3168e-07	2.48891e-06	up	ELAVL4
	924	ENSG00000253520	1.5685	0.296534	1.22688e-07	7.51254e-07	up	NA
	925	ENSG00000225210	1.56739	0.30415	2.55869e-07	1.511e-06	up	NA
	926	ENSG00000158458	1.56657	0.233102	1.81032e-11	1.53966e-10	up	NRG2
	927	ENSG00000127084	1.5663	0.23626	3.36676e-11	2.81329e-10	up	FGD3
	928	ENSG00000255042	1.56565	0.299047	1.64565e-07	9.93123e-07	up	NA
	929	ENSG00000250874	1.56554	0.306934	3.38648e-07	1.97295e-06	up	NA
	930	ENSG00000166961	1.5648	0.309863	4.41827e-07	2.54366e-06	up	MS4A15
	931	ENSG00000172350	1.5633	0.256093	1.03178e-09	7.63942e-09	up	ABCG4
	932	ENSG00000163347	1.56193	0.113353	3.39468e-43	1.06898e-41	up	CLDN1
	933	ENSG00000078725	1.56149	0.309644	4.58626e-07	2.63454e-06	up	BRINP1
	934	ENSG00000274525	1.56092	0.310081	4.80539e-07	2.75433e-06	up	NA
	935	ENSG00000118004	1.56062	0.180315	4.92897e-18	6.30871e-17	up	COLEC11
	936	ENSG00000179909	1.56014	0.289545	7.11448e-08	4.45192e-07	up	ZNF154
	937	ENSG00000164651	1.55978	0.128029	3.82838e-34	9.40888e-33	up	SP8
	938	ENSG00000141750	1.55871	0.118292	1.19332e-39	3.42999e-38	up	STAC2
	939	ENSG00000100473	1.55824	0.0583156	2.69225e-157	6.6306e-155	up	COCH
	940	ENSG00000225465	1.55801	0.310188	5.09291e-07	2.91128e-06	up	NA
	941	ENSG00000074416	1.55721	0.275512	1.58557e-08	1.05122e-07	up	MGLL
	942	ENSG00000100721	1.55714	0.309719	4.96686e-07	2.84201e-06	up	TCL1A
	943	ENSG00000143878	1.55552	0.0789054	1.64518e-86	1.34588e-84	up	RHOB
	944	ENSG00000134954	1.55312	0.0904842	4.89239e-66	2.61341e-64	up	ETS1
	945	ENSG00000142549	1.55072	0.310315	5.81594e-07	3.3012e-06	up	IGLON5
	946	ENSG00000266830	1.54768	0.297855	2.03513e-07	1.21315e-06	up	NA
	947	ENSG00000258128	1.54552	0.301895	3.06544e-07	1.79665e-06	up	NA
	948	ENSG00000166183	1.54376	0.31026	6.50153e-07	3.66899e-06	up	ASPG
	949	ENSG00000187721	1.54282	0.310571	6.77616e-07	3.81661e-06	up	GTF2IP3
	950	ENSG00000164929	1.54266	0.2397	1.22817e-10	9.85108e-10	up	BAALC
	951	ENSG00000106113	1.5414	0.30871	5.94376e-07	3.36885e-06	up	CRHR2
	952	ENSG00000213445	1.54129	0.100857	1.00824e-52	4.02556e-51	up	SIPA1
	953	ENSG00000166401	1.54079	0.205717	6.89443e-14	7.02872e-13	up	SERPINB8
	954	ENSG00000141376	1.53909	0.140143	4.64966e-28	9.20372e-27	up	BCAS3
	955	ENSG00000197705	1.53908	0.165189	1.19584e-20	1.74869e-19	up	KLHL14
	956	ENSG00000162706	1.53782	0.30899	6.46015e-07	3.64652e-06	up	CADM3
	957	ENSG00000177519	1.53743	0.149662	9.3598e-25	1.64903e-23	up	RPRM
	958	ENSG00000183305	1.53554	0.307608	5.97967e-07	3.38838e-06	up	MAGEA2
	959	ENSG00000005471	1.53441	0.295041	1.98576e-07	1.18553e-06	up	ABCB4
	960	ENSG00000226476	1.53278	0.309703	7.45198e-07	4.18216e-06	up	LINC01748
	961	ENSG00000161798	1.5316	0.310419	8.05715e-07	4.50665e-06	up	AQP5
	962	ENSG00000189064	1.53011	0.299422	3.21782e-07	1.87843e-06	up	GAGE2E
	963	ENSG00000262267	1.52869	0.310012	8.17794e-07	4.56766e-06	up	NA
	964	ENSG00000253958	1.52705	0.297552	2.86623e-07	1.68369e-06	up	CLDN23
	965	ENSG00000106013	1.52671	0.31036	8.69254e-07	4.83776e-06	up	ANKRD7
	966	ENSG00000170049	1.52602	0.146332	1.83766e-25	3.33819e-24	up	KCNAB3
	967	ENSG00000054282	1.52507	0.09655	3.33321e-56	1.45227e-54	up	SDCCAG8
	968	ENSG00000095370	1.52464	0.310317	8.96176e-07	4.9793e-06	up	SH2D3C
	969	ENSG00000117600	1.52336	0.238459	1.67685e-10	1.32545e-09	up	PLPPR4
	970	ENSG00000092068	1.5227	0.133345	3.34978e-30	7.12497e-29	up	SLC7A8
	971	ENSG00000167619	1.52232	0.221789	6.70535e-12	5.89571e-11	up	TMEM145
	972	ENSG00000136404	1.52163	0.168634	1.82579e-19	2.51135e-18	up	TM6SF1
	973	ENSG00000186395	1.52127	0.0988772	2.04872e-53	8.35087e-52	up	KRT10
	974	ENSG00000164972	1.52038	0.294022	2.32891e-07	1.37983e-06	up	SPMIP6
	975	ENSG00000206192	1.51835	0.308352	8.47545e-07	4.71919e-06	up	NA
	976	ENSG00000250133	1.51725	0.293123	2.26485e-07	1.34358e-06	up	HOXC-AS2
	977	ENSG00000135638	1.51307	0.256991	3.917e-09	2.75793e-08	up	EMX1
	978	ENSG00000138735	1.51077	0.131617	1.69111e-30	3.65345e-29	up	PDE5A
	979	ENSG00000137691	1.51036	0.261242	7.40592e-09	5.07101e-08	up	CFAP300
	980	ENSG00000213186	1.50648	0.183172	1.96207e-16	2.29993e-15	up	TRIM59
	981	ENSG00000158014	1.50607	0.310404	1.22251e-06	6.67363e-06	up	SLC30A2
	982	ENSG00000166262	1.50591	0.2261	2.73149e-11	2.29474e-10	up	FAM227B
	983	ENSG00000177599	1.50481	0.309275	1.14109e-06	6.25397e-06	up	ZNF491
	984	ENSG00000101282	1.50463	0.308934	1.1137e-06	6.11766e-06	up	RSPO4
	985	ENSG00000134326	1.50201	0.261769	9.58491e-09	6.4777e-08	up	CMPK2
	986	ENSG00000205978	1.49861	0.119516	4.57023e-36	1.19876e-34	up	NYNRIN
	987	ENSG00000197380	1.497	0.172004	3.22437e-18	4.16339e-17	up	DACT3
	988	ENSG00000159713	1.49576	0.176949	2.83873e-17	3.49935e-16	up	TPPP3
	989	ENSG00000277182	1.49549	0.303479	8.31528e-07	4.63994e-06	up	LOC100287808
	990	ENSG00000164082	1.4921	0.30826	1.29593e-06	7.03666e-06	up	GRM2
	991	ENSG00000177108	1.49046	0.298792	6.092e-07	3.44953e-06	up	ZDHHC22
	992	ENSG00000099251	1.48909	0.31025	1.58952e-06	8.55334e-06	up	NA
	993	ENSG00000007866	1.48888	0.145042	1.01117e-24	1.77749e-23	up	TEAD3
	994	ENSG00000127920	1.48888	0.169064	1.29017e-18	1.69205e-17	up	GNG11
	995	ENSG00000248663	1.48829	0.293258	3.87452e-07	2.2422e-06	up	NA
	996	ENSG00000184719	1.48761	0.309795	1.57164e-06	8.46495e-06	up	RNLS
	997	ENSG00000165568	1.4867	0.304967	1.08836e-06	5.98882e-06	up	AKR1E2
	998	ENSG00000119699	1.48435	0.134677	3.00636e-28	5.98636e-27	up	TGFB3
	999	ENSG00000108511	1.48366	0.15645	2.46449e-21	3.71531e-20	up	HOXB6
	1000	ENSG00000161405	1.48161	0.308658	1.58533e-06	8.53671e-06	up	IKZF3
	1001	ENSG00000149654	1.48071	0.310361	1.83364e-06	9.79492e-06	up	CDH22
	1002	ENSG00000205246	1.47919	0.251482	4.05675e-09	2.85118e-08	up	NA
	1003	ENSG00000250546	1.47851	0.308946	1.70427e-06	9.13305e-06	up	LINC02994
	1004	ENSG00000186354	1.47834	0.307606	1.54024e-06	8.30539e-06	up	NA
	1005	ENSG00000180535	1.47804	0.309479	1.78903e-06	9.56315e-06	up	BHLHA15
	1006	ENSG00000265666	1.47733	0.298389	7.38306e-07	4.14546e-06	up	RARA-AS1
	1007	ENSG00000174473	1.47727	0.228847	1.08009e-10	8.69906e-10	up	GALNTL6
	1008	ENSG00000277287	1.47682	0.240158	7.77916e-10	5.82243e-09	up	NA
	1009	ENSG00000248498	1.47401	0.309813	1.95788e-06	1.04158e-05	up	NA
	1010	ENSG00000134245	1.47166	0.163459	2.19182e-19	2.99544e-18	up	WNT2B
	1011	ENSG00000006740	1.47054	0.121199	7.04077e-34	1.71418e-32	up	ARHGAP44
	1012	ENSG00000112164	1.47047	0.251341	4.90143e-09	3.4212e-08	up	GLP1R
	1013	ENSG00000171121	1.47044	0.307014	1.67209e-06	8.97084e-06	up	KCNMB3
	1014	ENSG00000162591	1.46918	0.250499	4.49143e-09	3.14629e-08	up	MEGF6
	1015	ENSG00000196189	1.46802	0.277204	1.18505e-07	7.27161e-07	up	SEMA4A
	1016	ENSG00000088882	1.46691	0.095342	2.03847e-53	8.32359e-52	up	CPXM1
	1017	ENSG00000132205	1.46418	0.308503	2.07408e-06	1.10039e-05	up	EMILIN2
	1018	ENSG00000113805	1.4631	0.306978	1.87773e-06	1.00121e-05	up	CNTN3
	1019	ENSG00000141179	1.46024	0.133609	8.35546e-28	1.64418e-26	up	PCTP
	1020	ENSG00000214553	1.45871	0.309949	2.5227e-06	1.32429e-05	up	NA
	1021	ENSG00000268119	1.45866	0.308412	2.24967e-06	1.18602e-05	up	LOC105372321
	1022	ENSG00000204366	1.45644	0.0968783	4.41711e-51	1.71388e-49	up	ZBTB12
	1023	ENSG00000167554	1.45593	0.299194	1.13779e-06	6.23732e-06	up	ZNF610
	1024	ENSG00000182575	1.45476	0.309491	2.59537e-06	1.36e-05	up	NXPH3
	1025	ENSG00000102924	1.4533	0.214723	1.30335e-11	1.12319e-10	up	CBLN1
	1026	ENSG00000138623	1.45225	0.167477	4.26932e-18	5.47638e-17	up	SEMA7A
	1027	ENSG00000167034	1.45224	0.160019	1.13258e-19	1.57638e-18	up	NKX3-1
	1028	ENSG00000141314	1.45179	0.277631	1.70254e-07	1.0256e-06	up	RHBDL3
	1029	ENSG00000069188	1.44963	0.310895	3.11998e-06	1.62435e-05	up	SDK2
	1030	ENSG00000253537	1.44857	0.295275	9.30254e-07	5.1564e-06	up	PCDHGA7
	1031	ENSG00000133640	1.44745	0.242507	2.39158e-09	1.71644e-08	up	LRRIQ1
	1032	ENSG00000272121	1.44612	0.192925	6.59212e-14	6.72931e-13	up	NA
	1033	ENSG00000169856	1.44488	0.303596	1.94332e-06	1.03454e-05	up	ONECUT1
	1034	ENSG00000159723	1.44414	0.310627	3.33343e-06	1.72855e-05	up	AGRP
	1035	ENSG00000177098	1.44403	0.296689	1.13212e-06	6.20917e-06	up	SCN4B
	1036	ENSG00000267102	1.44357	0.310614	3.36038e-06	1.74176e-05	up	NA
	1037	ENSG00000189212	1.44181	0.188566	2.07005e-14	2.17383e-13	up	NA
	1038	ENSG00000243350	1.44084	0.309999	3.35364e-06	1.73865e-05	up	NA
	1039	ENSG00000267254	1.43827	0.291019	7.72497e-07	4.32705e-06	up	ZNF790-AS1
	1040	ENSG00000053524	1.43825	0.260077	3.20057e-08	2.06976e-07	up	MCF2L2
	1041	ENSG00000178163	1.43727	0.0762541	3.02726e-79	2.19965e-77	up	ZNF518B
	1042	ENSG00000132972	1.43643	0.295978	1.21517e-06	6.63665e-06	up	RNF17
	1043	ENSG00000143217	1.43636	0.273517	1.50892e-07	9.16039e-07	up	NECTIN4
	1044	ENSG00000248329	1.43288	0.0777857	8.92902e-76	6.05543e-74	up	APELA
	1045	ENSG00000013588	1.43218	0.302435	2.18509e-06	1.15405e-05	up	GPRC5A
	1046	ENSG00000269586	1.4315	0.265187	6.73647e-08	4.23009e-07	up	CT45A10
	1047	ENSG00000143184	1.42755	0.308323	3.65563e-06	1.88768e-05	up	XCL1
	1048	ENSG00000181007	1.42529	0.298163	1.75095e-06	9.37246e-06	up	ZFP82
	1049	ENSG00000206432	1.42456	0.310484	4.47145e-06	2.28624e-05	up	TMEM200C
	1050	ENSG00000160973	1.42189	0.308265	3.97728e-06	2.0443e-05	up	FOXH1
	1051	ENSG00000113396	1.41705	0.111533	5.53374e-37	1.49162e-35	up	SLC27A6
	1052	ENSG00000224940	1.417	0.26895	1.37442e-07	8.3721e-07	up	PRRT4
	1053	ENSG00000280180	1.41669	0.298434	2.06377e-06	1.09517e-05	up	NA
	1054	ENSG00000165061	1.41456	0.301894	2.79122e-06	1.45935e-05	up	ZMAT4
	1055	ENSG00000105784	1.41355	0.143234	5.68e-23	9.22242e-22	up	RUNDC3B
	1056	ENSG00000259692	1.41353	0.307769	4.37263e-06	2.23963e-05	up	NA
	1057	ENSG00000182584	1.41326	0.308949	4.77548e-06	2.43266e-05	up	NA
	1058	ENSG00000266743	1.41294	0.309158	4.87036e-06	2.47593e-05	up	NA
	1059	ENSG00000115361	1.4124	0.13613	3.20876e-25	5.73094e-24	up	ACADL
	1060	ENSG00000185306	1.41021	0.310637	5.63214e-06	2.83937e-05	up	C12orf56
	1061	ENSG00000216307	1.40962	0.303772	3.47729e-06	1.79797e-05	up	NA
	1062	ENSG00000198062	1.40824	0.307551	4.6748e-06	2.38552e-05	up	POTEH
	1063	ENSG00000261308	1.407	0.309783	5.57548e-06	2.81384e-05	up	FIGNL2
	1064	ENSG00000111224	1.40684	0.13143	9.73095e-27	1.83757e-25	up	PARP11
	1065	ENSG00000050165	1.40618	0.213017	4.07676e-11	3.38001e-10	up	DKK3
	1066	ENSG00000231689	1.40404	0.308657	5.39368e-06	2.72679e-05	up	LINC01090
	1067	ENSG00000256151	1.40219	0.310325	6.22933e-06	3.12562e-05	up	NA
	1068	ENSG00000230445	1.40173	0.286212	9.70494e-07	5.36392e-06	up	LRRC37A6P
	1069	ENSG00000105464	1.39897	0.173133	6.45824e-16	7.38531e-15	up	GRIN2D
	1070	ENSG00000253741	1.39848	0.307072	5.25753e-06	2.66199e-05	up	LNCOC1
	1071	ENSG00000157399	1.39709	0.295402	2.2513e-06	1.18661e-05	up	ARSL
	1072	ENSG00000165434	1.39507	0.111792	9.70552e-36	2.52311e-34	up	PGM2L1
	1073	ENSG00000137857	1.39461	0.309789	6.73789e-06	3.36492e-05	up	DUOX1
	1074	ENSG00000213626	1.39356	0.0532486	5.70654e-151	1.27158e-148	up	LBH
	1075	ENSG00000248238	1.39317	0.309242	6.63418e-06	3.31737e-05	up	NA
	1076	ENSG00000109832	1.39298	0.250404	2.65307e-08	1.72523e-07	up	DDX25
	1077	ENSG00000262621	1.39005	0.267765	2.0882e-07	1.24288e-06	up	NA
	1078	ENSG00000179761	1.38929	0.143108	2.78691e-22	4.38208e-21	up	PIPOX
	1079	ENSG00000116771	1.38583	0.308737	7.16558e-06	3.56405e-05	up	AGMAT
	1080	ENSG00000162757	1.38557	0.18647	1.08166e-13	1.08803e-12	up	C1orf74
	1081	ENSG00000103811	1.38488	0.140113	4.88437e-23	7.94712e-22	up	CTSH
	1082	ENSG00000172889	1.38414	0.119603	5.66371e-31	1.24309e-29	up	EGFL7
	1083	ENSG00000249741	1.38323	0.310455	8.37021e-06	4.13509e-05	up	NA
	1084	ENSG00000095587	1.38197	0.229929	1.85038e-09	1.34077e-08	up	TLL2
	1085	ENSG00000184005	1.38145	0.251125	3.7756e-08	2.42686e-07	up	ST6GALNAC3
	1086	ENSG00000154678	1.38022	0.310874	9.00424e-06	4.4352e-05	up	PDE1C
	1087	ENSG00000162105	1.3802	0.310711	8.90942e-06	4.39035e-05	up	SHANK2
	1088	ENSG00000171291	1.37989	0.30849	7.7116e-06	3.82506e-05	up	ZNF439
	1089	ENSG00000176092	1.37645	0.263642	1.78066e-07	1.06935e-06	up	CRYBG2
	1090	ENSG00000073150	1.37609	0.160619	1.05823e-17	1.32687e-16	up	PANX2
	1091	ENSG00000132026	1.37562	0.290665	2.21613e-06	1.16939e-05	up	RTBDN
	1092	ENSG00000279369	1.37495	0.2612	1.40972e-07	8.57598e-07	up	NA
	1093	ENSG00000165731	1.37463	0.17907	1.63495e-14	1.72934e-13	up	RET
	1094	ENSG00000234421	1.37428	0.31047	9.57961e-06	4.69489e-05	up	NA
	1095	ENSG00000003137	1.37151	0.0880242	9.80043e-55	4.08735e-53	up	CYP26B1
	1096	ENSG00000073146	1.37078	0.306845	7.92061e-06	3.92541e-05	up	MOV10L1
	1097	ENSG00000248360	1.37047	0.304053	6.56483e-06	3.28691e-05	up	LINC00504
	1098	ENSG00000225813	1.36889	0.310334	1.0289e-05	5.01943e-05	up	NA
	1099	ENSG00000269994	1.36832	0.310774	1.06792e-05	5.19895e-05	up	LINC02893
	1100	ENSG00000167920	1.36716	0.143195	1.32858e-21	2.01849e-20	up	KRT10-AS1
	1101	ENSG00000243709	1.36341	0.305994	8.36317e-06	4.13248e-05	up	LEFTY1
	1102	ENSG00000138411	1.36297	0.284856	1.71198e-06	9.17013e-06	up	HECW2
	1103	ENSG00000166450	1.3626	0.101278	2.91484e-41	8.78848e-40	up	PRTG
	1104	ENSG00000206177	1.36211	0.310145	1.12395e-05	5.45355e-05	up	HBM
	1105	ENSG00000253554	1.36122	0.310575	1.17098e-05	5.66413e-05	up	LINC01414
	1106	ENSG00000147364	1.36029	0.0951234	2.17863e-46	7.40893e-45	up	FBXO25
	1107	ENSG00000157510	1.3602	0.188709	5.68005e-13	5.42876e-12	up	AFAP1L1
	1108	ENSG00000250519	1.35647	0.309142	1.14478e-05	5.54774e-05	up	NA
	1109	ENSG00000138798	1.35594	0.222934	1.18498e-09	8.72675e-09	up	EGF
	1110	ENSG00000170396	1.35533	0.185329	2.6102e-13	2.55633e-12	up	ZNF804A
	1111	ENSG00000186862	1.35388	0.246065	3.75237e-08	2.41259e-07	up	PDZD7
	1112	ENSG00000184113	1.35315	0.308177	1.12928e-05	5.47602e-05	up	CLDN5
	1113	ENSG00000176998	1.35272	0.310145	1.29135e-05	6.20662e-05	up	NA
	1114	ENSG00000137507	1.3524	0.277037	1.05201e-06	5.79425e-06	up	LRRC32
	1115	ENSG00000162981	1.35223	0.121634	1.03525e-28	2.09169e-27	up	LRATD1
	1116	ENSG00000159176	1.35206	0.0810417	1.72642e-62	8.61261e-61	up	CSRP1
	1117	ENSG00000174307	1.35074	0.0727887	7.16458e-77	4.94483e-75	up	PHLDA3
	1118	ENSG00000165566	1.34979	0.256746	1.46185e-07	8.88616e-07	up	AMER2
	1119	ENSG00000170748	1.34887	0.309397	1.30251e-05	6.25379e-05	up	RBMXL2
	1120	ENSG00000091592	1.34827	0.176474	2.1712e-14	2.27597e-13	up	NLRP1
	1121	ENSG00000136944	1.34684	0.0947809	7.93792e-46	2.65699e-44	up	LMX1B
	1122	ENSG00000164741	1.34439	0.115944	4.36254e-31	9.62929e-30	up	DLC1
	1123	ENSG00000233421	1.34242	0.304909	1.06915e-05	5.20385e-05	up	LINC01783
	1124	ENSG00000108839	1.34163	0.305537	1.12809e-05	5.4725e-05	up	ALOX12
	1125	ENSG00000233701	1.34115	0.307238	1.27028e-05	6.11287e-05	up	PRR23C
	1126	ENSG00000249645	1.34021	0.310289	1.56562e-05	7.44076e-05	up	NA
	1127	ENSG00000279208	1.34012	0.31013	1.55217e-05	7.37983e-05	up	NA
	1128	ENSG00000229689	1.34011	0.302889	9.67008e-06	4.73625e-05	up	ANKRD33BP1
	1129	ENSG00000197872	1.33857	0.206804	9.63079e-11	7.78885e-10	up	CYRIA
	1130	ENSG00000255150	1.33857	0.21688	6.7468e-10	5.07898e-09	up	EID3
	1131	ENSG00000274849	1.33591	0.270171	7.62618e-07	4.27376e-06	up	NA
	1132	ENSG00000130035	1.33463	0.273999	1.11075e-06	6.10336e-06	up	GALNT8
	1133	ENSG00000140511	1.33423	0.0855409	7.56342e-55	3.17135e-53	up	HAPLN3
	1134	ENSG00000184922	1.33321	0.261775	3.52548e-07	2.04883e-06	up	FMNL1
	1135	ENSG00000107738	1.32997	0.307977	1.57156e-05	7.46596e-05	up	VSIR
	1136	ENSG00000164794	1.32802	0.283711	2.85623e-06	1.49235e-05	up	KCNV1
	1137	ENSG00000072163	1.32685	0.260889	3.6595e-07	2.12249e-06	up	LIMS2
	1138	ENSG00000266714	1.32601	0.310647	1.96763e-05	9.22871e-05	up	MYO15B
	1139	ENSG00000183032	1.32557	0.301238	1.08051e-05	5.25803e-05	up	SLC25A21
	1140	ENSG00000132854	1.32463	0.30943	1.8617e-05	8.76245e-05	up	KANK4
	1141	ENSG00000234546	1.32435	0.291655	5.60402e-06	2.82581e-05	up	LNCTAM34A
	1142	ENSG00000267284	1.32431	0.310651	2.01698e-05	9.43635e-05	up	NA
	1143	ENSG00000166073	1.32428	0.114743	8.17841e-31	1.78498e-29	up	GPR176
	1144	ENSG00000113327	1.31874	0.282487	3.03678e-06	1.58315e-05	up	GABRG2
	1145	ENSG00000171604	1.31857	0.116595	1.1843e-29	2.46304e-28	up	CXXC5
	1146	ENSG00000161381	1.31795	0.291089	5.9644e-06	2.99654e-05	up	PLXDC1
	1147	ENSG00000251209	1.31668	0.310266	2.19857e-05	0.000102307	up	LINC00923
	1148	ENSG00000198133	1.3163	0.264255	6.32027e-07	3.5736e-06	up	TMEM229B
	1149	ENSG00000175471	1.31503	0.284812	3.88998e-06	2.0025e-05	up	MCTP1
	1150	ENSG00000255262	1.315	0.305412	1.66472e-05	7.88772e-05	up	ELOBP2
	1151	ENSG00000135324	1.31246	0.201334	7.08598e-11	5.78474e-10	up	MRAP2
	1152	ENSG00000092850	1.31204	0.309561	2.25129e-05	0.000104573	up	TEKT2
	1153	ENSG00000266736	1.31177	0.304824	1.68223e-05	7.9642e-05	up	NA
	1154	ENSG00000144824	1.31157	0.133989	1.26006e-22	2.00828e-21	up	PHLDB2
	1155	ENSG00000258932	1.31137	0.310288	2.37568e-05	0.000110023	up	RPS27AP4
	1156	ENSG00000107954	1.3094	0.293582	8.19305e-06	4.05185e-05	up	NEURL1
	1157	ENSG00000121653	1.30819	0.103471	1.22316e-36	3.27067e-35	up	MAPK8IP1
	1158	ENSG00000127561	1.30783	0.11905	4.48783e-28	8.89093e-27	up	SYNGR3
	1159	ENSG00000235711	1.30769	0.283199	3.88257e-06	1.99913e-05	up	ANKRD34C
	1160	ENSG00000173157	1.30605	0.218211	2.16064e-09	1.5569e-08	up	ADAMTS20
	1161	ENSG00000240429	1.30524	0.31016	2.57315e-05	0.000118582	up	NA
	1162	ENSG00000266602	1.30338	0.310226	2.65264e-05	0.000121957	up	NA
	1163	ENSG00000174514	1.30335	0.179587	3.94474e-13	3.80984e-12	up	MFSD4A
	1164	ENSG00000180229	1.29981	0.185797	2.6369e-12	2.39967e-11	up	NA
	1165	ENSG00000180543	1.29924	0.310635	2.88287e-05	0.000131761	up	TSPYL5
	1166	ENSG00000088756	1.29784	0.308843	2.64248e-05	0.000121609	up	ARHGAP28
	1167	ENSG00000163909	1.29452	0.12753	3.29025e-24	5.65628e-23	up	HEYL
	1168	ENSG00000112981	1.29404	0.308261	2.69423e-05	0.000123626	up	NME5
	1169	ENSG00000233622	1.29357	0.303131	1.97791e-05	9.27028e-05	up	NA
	1170	ENSG00000183779	1.2926	0.131931	1.15413e-22	1.84448e-21	up	ZNF703
	1171	ENSG00000166800	1.29244	0.310467	3.14265e-05	0.000142885	up	LDHAL6A
	1172	ENSG00000234493	1.28951	0.175947	2.31883e-13	2.27479e-12	up	NA
	1173	ENSG00000142235	1.28618	0.195341	4.57096e-11	3.7777e-10	up	LMTK3
	1174	ENSG00000225449	1.28611	0.310764	3.4953e-05	0.000157602	up	NA
	1175	ENSG00000197467	1.28582	0.309341	3.22952e-05	0.000146578	up	COL13A1
	1176	ENSG00000123329	1.28463	0.309743	3.36282e-05	0.000152097	up	ARHGAP9
	1177	ENSG00000171608	1.28458	0.154731	1.0237e-16	1.22514e-15	up	PIK3CD
	1178	ENSG00000205181	1.2843	0.310818	3.59618e-05	0.000161745	up	LINC00654
	1179	ENSG00000203907	1.28284	0.310361	3.57457e-05	0.000160866	up	OOEP
	1180	ENSG00000131187	1.28174	0.106693	3.02144e-33	7.20619e-32	up	F12
	1181	ENSG00000167157	1.28123	0.166325	1.32754e-14	1.41377e-13	up	PRRX2
	1182	ENSG00000197757	1.281	0.14391	5.51511e-19	7.41166e-18	up	HOXC6
	1183	ENSG00000163364	1.28024	0.1781	6.5592e-13	6.24172e-12	up	LINC01116
	1184	ENSG00000265763	1.27984	0.190309	1.75474e-11	1.49565e-10	up	ZNF488
	1185	ENSG00000035664	1.27941	0.15992	1.24122e-15	1.39754e-14	up	DAPK2
	1186	ENSG00000119771	1.27923	0.168731	3.41592e-14	3.53482e-13	up	KLHL29
	1187	ENSG00000182916	1.27799	0.299967	2.04029e-05	9.5359e-05	up	TCEAL7
	1188	ENSG00000178662	1.27729	0.1844	4.3067e-12	3.84008e-11	up	CSRNP3
	1189	ENSG00000184160	1.27624	0.170478	7.08864e-14	7.21414e-13	up	ADRA2C
	1190	ENSG00000105855	1.27603	0.153283	8.4553e-17	1.01711e-15	up	ITGB8
	1191	ENSG00000128645	1.27419	0.302768	2.57096e-05	0.000118504	up	HOXD1
	1192	ENSG00000136425	1.27403	0.0758862	2.95435e-63	1.48652e-61	up	CIB2
	1193	ENSG00000124191	1.27297	0.150416	2.60546e-17	3.22028e-16	up	TOX2
	1194	ENSG00000229057	1.2725	0.310375	4.13371e-05	0.000184644	up	NA
	1195	ENSG00000250979	1.27175	0.309821	4.04668e-05	0.000180998	up	NA
	1196	ENSG00000123243	1.26997	0.306807	3.48328e-05	0.000157151	up	ITIH5
	1197	ENSG00000164197	1.26953	0.310445	4.32532e-05	0.000192358	up	RNF180
	1198	ENSG00000121388	1.2694	0.307225	3.59901e-05	0.000161841	up	NA
	1199	ENSG00000267733	1.26896	0.303703	2.93718e-05	0.00013409	up	NA
	1200	ENSG00000253873	1.26791	0.224851	1.71135e-08	1.13109e-07	up	PCDHGA11
	1201	ENSG00000175745	1.26748	0.0993831	2.98038e-37	8.08018e-36	up	NR2F1
	1202	ENSG00000105894	1.26716	0.291708	1.39957e-05	6.68416e-05	up	PTN
	1203	ENSG00000110002	1.2665	0.24136	1.54292e-07	9.3547e-07	up	VWA5A
	1204	ENSG00000182580	1.26572	0.15021	3.56552e-17	4.3631e-16	up	EPHB3
	1205	ENSG00000156509	1.26561	0.285117	9.04152e-06	4.44889e-05	up	FBXO43
	1206	ENSG00000115896	1.26178	0.288514	1.22332e-05	5.90147e-05	up	PLCL1
	1207	ENSG00000122861	1.26139	0.260514	1.28582e-06	6.99147e-06	up	PLAU
	1208	ENSG00000007516	1.26088	0.271062	3.29297e-06	1.70984e-05	up	BAIAP3
	1209	ENSG00000259527	1.26072	0.309868	4.73053e-05	0.000209208	up	LINC00052
	1210	ENSG00000162745	1.26002	0.271227	3.39078e-06	1.75595e-05	up	OLFML2B
	1211	ENSG00000131951	1.25992	0.310558	4.97159e-05	0.000219059	up	LRRC9
	1212	ENSG00000231806	1.25858	0.252815	6.41588e-07	3.62503e-06	up	PCAT7
	1213	ENSG00000168481	1.25852	0.300236	2.76803e-05	0.000126813	up	LGI3
	1214	ENSG00000254876	1.25815	0.240791	1.74096e-07	1.04739e-06	up	SUGT1P4-STRA6LP
	1215	ENSG00000233170	1.25773	0.310517	5.11208e-05	0.000224615	up	NA
	1216	ENSG00000143028	1.2572	0.104815	3.79594e-33	9.02577e-32	up	SYPL2
	1217	ENSG00000225492	1.25605	0.309616	4.97485e-05	0.000219161	up	NA
	1218	ENSG00000154511	1.25524	0.186321	1.61693e-11	1.38323e-10	up	DIPK1A
	1219	ENSG00000128596	1.25275	0.120437	2.43546e-25	4.37989e-24	up	CCDC136
	1220	ENSG00000217236	1.25268	0.301783	3.31139e-05	0.000149916	up	SP9
	1221	ENSG00000157827	1.25255	0.0597815	1.79526e-97	1.75748e-95	up	FMNL2
	1222	ENSG00000235890	1.2524	0.302826	3.53833e-05	0.000159419	up	TSPEAR-AS1
	1223	ENSG00000203799	1.25233	0.310045	5.36351e-05	0.000235	up	CCDC162P
	1224	ENSG00000101445	1.25132	0.186115	1.77587e-11	1.51256e-10	up	PPP1R16B
	1225	ENSG00000130475	1.25127	0.121125	5.13232e-25	9.11776e-24	up	FCHO1
	1226	ENSG00000067840	1.25065	0.0973301	8.64725e-38	2.38304e-36	up	PDZD4
	1227	ENSG00000169297	1.25049	0.310453	5.62613e-05	0.000245433	up	NR0B1
	1228	ENSG00000131831	1.25042	0.307439	4.75817e-05	0.000210254	up	RAI2
	1229	ENSG00000183770	1.24989	0.308977	5.22648e-05	0.000229512	up	FOXL2
	1230	ENSG00000206532	1.24954	0.297776	2.71393e-05	0.000124432	up	NA
	1231	ENSG00000111913	1.24948	0.305883	4.4112e-05	0.000196065	up	RIPOR2
	1232	ENSG00000111670	1.24708	0.0521699	2.774e-126	4.18732e-124	up	GNPTAB
	1233	ENSG00000179314	1.24661	0.111932	8.26586e-29	1.67879e-27	up	WSCD1
	1234	ENSG00000260401	1.24636	0.283906	1.13321e-05	5.49393e-05	up	NA
	1235	ENSG00000111666	1.24612	0.045518	5.22492e-165	1.37357e-162	up	CHPT1
	1236	ENSG00000227214	1.24605	0.303482	4.02869e-05	0.000180297	up	NA
	1237	ENSG00000114270	1.24549	0.257432	1.31057e-06	7.11282e-06	up	COL7A1
	1238	ENSG00000257702	1.24498	0.306687	4.91876e-05	0.000217017	up	LBX2-AS1
	1239	ENSG00000106333	1.24464	0.155924	1.4356e-15	1.60943e-14	up	PCOLCE
	1240	ENSG00000170382	1.24443	0.308403	5.45841e-05	0.000238711	up	LRRN2
	1241	ENSG00000142621	1.24229	0.305003	4.64038e-05	0.000205432	up	FHAD1
	1242	ENSG00000279154	1.24108	0.309781	6.16719e-05	0.000267161	up	NA
	1243	ENSG00000130558	1.24092	0.292346	2.18901e-05	0.000101903	up	OLFM1
	1244	ENSG00000196724	1.24067	0.211755	4.65707e-09	3.25453e-08	up	ZNF418
	1245	ENSG00000146904	1.24052	0.311032	6.65215e-05	0.000286578	up	EPHA1
	1246	ENSG00000139364	1.23846	0.308213	5.8647e-05	0.000255096	up	TMEM132B
	1247	ENSG00000169129	1.2382	0.269769	4.43517e-06	2.26968e-05	up	AFAP1L2
	1248	ENSG00000163694	1.23756	0.187381	3.9888e-11	3.31296e-10	up	RBM47
	1249	ENSG00000095627	1.2361	0.275364	7.15734e-06	3.56071e-05	up	TDRD1
	1250	ENSG00000165801	1.23587	0.117954	1.09592e-25	2.00951e-24	up	ARHGEF40
	1251	ENSG00000255690	1.23422	0.311038	7.24635e-05	0.000310064	up	TRIL
	1252	ENSG00000107807	1.23226	0.0979298	2.61483e-36	6.91289e-35	up	TLX1
	1253	ENSG00000135363	1.23165	0.309256	6.81611e-05	0.000293102	up	LMO2
	1254	ENSG00000158104	1.23047	0.309847	7.15054e-05	0.000306244	up	HPD
	1255	ENSG00000172818	1.23009	0.30703	6.1643e-05	0.000267085	up	OVOL1
	1256	ENSG00000249532	1.22994	0.129184	1.71761e-21	2.60447e-20	up	MIR302CHG
	1257	ENSG00000136717	1.22986	0.101258	6.04264e-34	1.47424e-32	up	BIN1
	1258	ENSG00000154914	1.22857	0.219006	2.02642e-08	1.32881e-07	up	USP43
	1259	ENSG00000180616	1.22712	0.306141	6.11462e-05	0.00026508	up	SSTR2
	1260	ENSG00000196263	1.22592	0.221277	3.02113e-08	1.9575e-07	up	ZNF471
	1261	ENSG00000106991	1.22559	0.294569	3.17372e-05	0.000144185	up	ENG
	1262	ENSG00000064300	1.22505	0.166336	1.77243e-13	1.75793e-12	up	NGFR
	1263	ENSG00000110092	1.224	0.0906439	1.49372e-41	4.53876e-40	up	CCND1
	1264	ENSG00000185340	1.22214	0.0696458	6.1722e-69	3.51365e-67	up	GAS2L1
	1265	ENSG00000008853	1.22181	0.109511	6.62569e-29	1.34918e-27	up	RHOBTB2
	1266	ENSG00000103253	1.22159	0.0791004	8.33482e-54	3.43932e-52	up	HAGHL
	1267	ENSG00000087076	1.22073	0.302132	5.33646e-05	0.000233946	up	HSD17B14
	1268	ENSG00000260209	1.22019	0.31088	8.67498e-05	0.00036763	up	NA
	1269	ENSG00000175093	1.22003	0.171631	1.17352e-12	1.09216e-11	up	SPSB4
	1270	ENSG00000255101	1.21958	0.280168	1.34278e-05	6.43784e-05	up	NA
	1271	ENSG00000090534	1.21772	0.310092	8.60211e-05	0.000364806	up	THPO
	1272	ENSG00000154654	1.21704	0.224678	6.0665e-08	3.82273e-07	up	NCAM2
	1273	ENSG00000140545	1.2154	0.0828761	1.07523e-48	3.94314e-47	up	MFGE8
	1274	ENSG00000214357	1.21534	0.187134	8.33126e-11	6.76359e-10	up	NEURL1B
	1275	ENSG00000223658	1.21443	0.270492	7.13233e-06	3.54902e-05	up	C1GALT1C1L
	1276	ENSG00000139289	1.21393	0.146406	1.11794e-16	1.33519e-15	up	PHLDA1
	1277	ENSG00000149451	1.21333	0.298149	4.71048e-05	0.000208418	up	ADAM33
	1278	ENSG00000178053	1.21191	0.105837	2.33127e-30	4.99038e-29	up	MLF1
	1279	ENSG00000261594	1.21185	0.302153	6.05394e-05	0.000262742	up	TPBGL
	1280	ENSG00000168675	1.21107	0.303122	6.46118e-05	0.000279173	up	LDLRAD4
	1281	ENSG00000131095	1.21044	0.309388	9.13922e-05	0.000385697	up	GFAP
	1282	ENSG00000158486	1.21035	0.308646	8.80026e-05	0.000372332	up	DNAH3
	1283	ENSG00000028277	1.20952	0.250631	1.39373e-06	7.54142e-06	up	POU2F2
	1284	ENSG00000146592	1.20922	0.276276	1.20411e-05	5.81597e-05	up	CREB5
	1285	ENSG00000183963	1.2088	0.082597	1.68226e-48	6.10231e-47	up	SMTN
	1286	ENSG00000226435	1.20684	0.248698	1.21832e-06	6.65226e-06	up	ANKRD18DP
	1287	ENSG00000137558	1.20608	0.214551	1.89391e-08	1.24367e-07	up	PI15
	1288	ENSG00000141506	1.20496	0.304319	7.50956e-05	0.000320272	up	PIK3R5
	1289	ENSG00000221818	1.20476	0.305946	8.22274e-05	0.000349414	up	EBF2
	1290	ENSG00000104892	1.20308	0.170866	1.9075e-12	1.75363e-11	up	KLC3
	1291	ENSG00000251322	1.20306	0.123496	2.00239e-22	3.17843e-21	up	SHANK3
	1292	ENSG00000160233	1.2023	0.168559	9.83199e-13	9.21631e-12	up	LRRC3
	1293	ENSG00000182983	1.20081	0.305981	8.69288e-05	0.000368322	up	ZNF662
	1294	ENSG00000154319	1.20058	0.310389	0.000109735	0.000457577	up	FAM167A
	1295	ENSG00000011105	1.19966	0.0964333	1.57806e-35	4.07526e-34	up	TSPAN9
	1296	ENSG00000176753	1.19776	0.310955	0.000117221	0.000486279	up	PAK6-AS1
	1297	ENSG00000237094	1.19772	0.310631	0.000115371	0.000479116	up	NA
	1298	ENSG00000213420	1.19711	0.171129	2.64559e-12	2.4057e-11	up	GPC2
	1299	ENSG00000258545	1.19704	0.280192	1.93546e-05	9.09132e-05	up	RHOXF1-AS1
	1300	ENSG00000137261	1.19636	0.263435	5.58812e-06	2.81961e-05	up	KIAA0319
	1301	ENSG00000139445	1.19594	0.231133	2.28816e-07	1.35672e-06	up	FOXN4
	1302	ENSG00000250056	1.19391	0.242802	8.77744e-07	4.88153e-06	up	LINC01018
	1303	ENSG00000234224	1.19346	0.308252	0.000108083	0.00045117	up	TMEM229A
	1304	ENSG00000171877	1.19332	0.162342	1.97277e-13	1.94673e-12	up	FRMD5
	1305	ENSG00000154898	1.19266	0.294916	5.25342e-05	0.000230565	up	NA
	1306	ENSG00000141639	1.19246	0.205686	6.73241e-09	4.63153e-08	up	MAPK4
	1307	ENSG00000181885	1.19194	0.152846	6.2739e-15	6.78643e-14	up	CLDN7
	1308	ENSG00000260293	1.19171	0.234325	3.66237e-07	2.12363e-06	up	NA
	1309	ENSG00000177483	1.19164	0.280269	2.12074e-05	9.89016e-05	up	RBM44
	1310	ENSG00000230524	1.18984	0.310822	0.000129171	0.00053208	up	NA
	1311	ENSG00000161243	1.18918	0.301777	8.12814e-05	0.000345457	up	FBXO27
	1312	ENSG00000187189	1.18915	0.0697658	3.8139e-65	2.00525e-63	up	TSPYL4
	1313	ENSG00000223392	1.18808	0.298078	6.72582e-05	0.000289432	up	CLDN10-AS1
	1314	ENSG00000215007	1.18468	0.304255	9.87206e-05	0.000414382	up	NA
	1315	ENSG00000251359	1.18449	0.285047	3.24686e-05	0.000147251	up	WWC2-AS2
	1316	ENSG00000243970	1.18446	0.310446	0.000135988	0.000558684	up	NA
	1317	ENSG00000092096	1.184	0.227933	2.05284e-07	1.22245e-06	up	SLC22A17
	1318	ENSG00000214076	1.18385	0.288644	4.10612e-05	0.000183516	up	CPSF1P1
	1319	ENSG00000155367	1.18384	0.242724	1.07534e-06	5.91854e-06	up	PPM1J
	1320	ENSG00000175985	1.18322	0.309067	0.000129	0.000531469	up	PLEKHD1
	1321	ENSG00000142185	1.18313	0.295631	6.27939e-05	0.00027182	up	TRPM2
	1322	ENSG00000186675	1.18242	0.30806	0.000123898	0.000511531	up	MAGEE2
	1323	ENSG00000259343	1.18217	0.275553	1.7855e-05	8.42401e-05	up	NA
	1324	ENSG00000260231	1.18211	0.216441	4.71966e-08	3.00642e-07	up	KDM7A-DT
	1325	ENSG00000184792	1.18111	0.131198	2.20536e-19	3.01219e-18	up	OSBP2
	1326	ENSG00000196208	1.18031	0.115795	2.12965e-24	3.7074e-23	up	GREB1
	1327	ENSG00000065413	1.18022	0.189451	4.67375e-10	3.56543e-09	up	ANKRD44
	1328	ENSG00000249421	1.17972	0.309784	0.000139987	0.000574408	up	ADAMTS19-AS1
	1329	ENSG00000140368	1.179	0.304766	0.000109496	0.000456744	up	PSTPIP1
	1330	ENSG00000259345	1.17849	0.306672	0.000121616	0.000502995	up	NA
	1331	ENSG00000124557	1.17793	0.310403	0.000147737	0.000604092	up	BTN1A1
	1332	ENSG00000114812	1.17744	0.307283	0.000127218	0.000524314	up	VIPR1
	1333	ENSG00000180155	1.17656	0.284303	3.49726e-05	0.00015766	up	LYNX1
	1334	ENSG00000138039	1.1761	0.242831	1.27707e-06	6.94715e-06	up	LHCGR
	1335	ENSG00000226985	1.17509	0.275944	2.05873e-05	9.62016e-05	up	LINC01203
	1336	ENSG00000104888	1.17462	0.17965	6.21815e-11	5.09226e-10	up	SLC17A7
	1337	ENSG00000164742	1.17461	0.119322	7.27065e-23	1.17157e-21	up	ADCY1
	1338	ENSG00000134470	1.17454	0.309521	0.00014782	0.000604324	up	IL15RA
	1339	ENSG00000187595	1.17276	0.293269	6.36323e-05	0.000275144	up	ZNF385C
	1340	ENSG00000145911	1.17252	0.158754	1.51572e-13	1.51229e-12	up	N4BP3
	1341	ENSG00000135083	1.17214	0.201084	5.57214e-09	3.86515e-08	up	CCNJL
	1342	ENSG00000116254	1.17127	0.306766	0.000134476	0.000552863	up	CHD5
	1343	ENSG00000174498	1.16999	0.0945804	3.7844e-35	9.68749e-34	up	IGDCC3
	1344	ENSG00000237187	1.16846	0.17706	4.13218e-11	3.42353e-10	up	NR2F1-AS1
	1345	ENSG00000158286	1.16812	0.0927865	2.41646e-36	6.3957e-35	up	RNF207
	1346	ENSG00000270953	1.16762	0.281712	3.40202e-05	0.000153633	up	NA
	1347	ENSG00000125462	1.1676	0.13328	1.94448e-18	2.53031e-17	up	MIR9-1HG
	1348	ENSG00000136383	1.16704	0.29532	7.75717e-05	0.000330351	up	ALPK3
	1349	ENSG00000137642	1.16639	0.0643835	2.37056e-73	1.51128e-71	up	SORL1
	1350	ENSG00000257514	1.16603	0.180235	9.8341e-11	7.94504e-10	up	LOC105369937
	1351	ENSG00000012779	1.16557	0.277748	2.71053e-05	0.000124301	up	ALOX5
	1352	ENSG00000151364	1.16553	0.300796	0.000106713	0.000445691	up	KCTD14
	1353	ENSG00000179331	1.16548	0.210784	3.21613e-08	2.07867e-07	up	RAB39A
	1354	ENSG00000268333	1.16514	0.291855	6.54658e-05	0.000282467	up	NA
	1355	ENSG00000154556	1.1645	0.310197	0.000173992	0.000703092	up	SORBS2
	1356	ENSG00000106536	1.16385	0.155691	7.69792e-14	7.81041e-13	up	POU6F2
	1357	ENSG00000258732	1.16365	0.301726	0.000114949	0.000477704	up	NA
	1358	ENSG00000241839	1.16325	0.108362	6.98574e-27	1.32882e-25	up	PLEKHO2
	1359	ENSG00000226383	1.16267	0.304791	0.000136381	0.000560202	up	LINC01876
	1360	ENSG00000260597	1.16229	0.243881	1.88095e-06	1.0027e-05	up	NA
	1361	ENSG00000100234	1.16194	0.307508	0.000157746	0.000641652	up	TIMP3
	1362	ENSG00000270964	1.161	0.228019	3.54906e-07	2.0615e-06	up	MAP2K5-DT
	1363	ENSG00000108387	1.15921	0.249469	3.37277e-06	1.7474e-05	up	SEPTIN4
	1364	ENSG00000111674	1.159	0.0515107	4.12839e-112	5.22119e-110	up	ENO2
	1365	ENSG00000185989	1.15884	0.101561	3.71301e-30	7.86896e-29	up	RASA3
	1366	ENSG00000177455	1.15855	0.310955	0.000194708	0.000780867	up	CD19
	1367	ENSG00000228314	1.15788	0.304806	0.000145425	0.000595468	up	NA
	1368	ENSG00000140323	1.15685	0.228999	4.37694e-07	2.52235e-06	up	DISP2
	1369	ENSG00000260329	1.15629	0.281723	4.05462e-05	0.000181318	up	NA
	1370	ENSG00000261787	1.15552	0.146926	3.70039e-15	4.0647e-14	up	TCF24
	1372	ENSG00000105928	1.15506	0.194443	2.84347e-09	2.03017e-08	up	GSDME
	1373	ENSG00000220785	1.15313	0.31079	0.000206999	0.000826336	up	NA
	1374	ENSG00000176463	1.15283	0.123601	1.08891e-20	1.59432e-19	up	SLCO3A1
	1375	ENSG00000186684	1.15261	0.1824	2.63065e-10	2.04828e-09	up	CYP27C1
	1376	ENSG00000144649	1.15112	0.179346	1.37688e-10	1.09836e-09	up	GASK1A
	1377	ENSG00000143434	1.15095	0.153292	5.9947e-14	6.14628e-13	up	SEMA6C
	1378	ENSG00000128298	1.14782	0.310468	0.000218103	0.000867554	up	BAIAP2L2
	1379	ENSG00000160505	1.14726	0.298933	0.000124118	0.000512347	up	NLRP4
	1380	ENSG00000142102	1.1466	0.152779	6.14503e-14	6.29765e-13	up	PGGHG
	1381	ENSG00000133216	1.14566	0.115378	3.0966e-23	5.09861e-22	up	EPHB2
	1382	ENSG00000151117	1.14493	0.281692	4.8141e-05	0.00021268	up	TMEM86A
	1383	ENSG00000009694	1.14316	0.184935	6.35172e-10	4.79237e-09	up	TENM1
	1384	ENSG00000169758	1.14212	0.247415	3.90844e-06	2.01157e-05	up	TMEM266
	1385	ENSG00000132906	1.14187	0.139393	2.57541e-16	2.99785e-15	up	CASP9
	1386	ENSG00000163071	1.14182	0.309948	0.000229695	0.000910412	up	SPATA18
	1387	ENSG00000167889	1.14173	0.170735	2.27528e-11	1.92322e-10	up	MGAT5B
	1388	ENSG00000188522	1.14071	0.114185	1.68515e-23	2.80224e-22	up	FAM83G
	1389	ENSG00000173930	1.1395	0.223704	3.50994e-07	2.0403e-06	up	SLCO4C1
	1390	ENSG00000250251	1.13833	0.168672	1.49096e-11	1.27968e-10	up	PKD1P6
	1391	ENSG00000092758	1.13824	0.122356	1.36958e-20	1.99652e-19	up	COL9A3
	1392	ENSG00000135423	1.13824	0.299063	0.000141226	0.000579166	up	GLS2
	1393	ENSG00000280195	1.13722	0.217432	1.6927e-07	1.01994e-06	up	NA
	1394	ENSG00000117480	1.13711	0.252979	6.96094e-06	3.47036e-05	up	FAAH
	1395	ENSG00000121101	1.13569	0.283783	6.28174e-05	0.000271872	up	TEX14
	1396	ENSG00000124749	1.1345	0.311018	0.000264601	0.00104013	up	COL21A1
	1397	ENSG00000123496	1.13389	0.309494	0.000248599	0.000980357	up	IL13RA2
	1398	ENSG00000248485	1.13326	0.246403	4.24076e-06	2.17447e-05	up	PCP4L1
	1399	ENSG00000254402	1.13236	0.284804	7.01041e-05	0.000300849	up	LRRC24
	1400	ENSG00000227743	1.13234	0.308979	0.000247552	0.000976561	up	NA
	1401	ENSG00000188910	1.12983	0.301231	0.000176336	0.000711458	up	GJB3
	1402	ENSG00000197943	1.12938	0.130863	6.12124e-18	7.77517e-17	up	PLCG2
	1403	ENSG00000170011	1.12865	0.0988522	3.41853e-30	7.26461e-29	up	MYRIP
	1404	ENSG00000143382	1.12855	0.194726	6.80762e-09	4.67914e-08	up	ADAMTSL4
	1405	ENSG00000139832	1.12795	0.149518	4.5606e-14	4.69236e-13	up	RAB20
	1406	ENSG00000184497	1.1264	0.292935	0.000120445	0.000498857	up	TMEM255B
	1407	ENSG00000187537	1.12639	0.282726	6.77521e-05	0.00029145	up	POTEG
	1408	ENSG00000278910	1.12593	0.299307	0.000168704	0.000683018	up	BANCR
	1409	ENSG00000255020	1.1256	0.310431	0.000287942	0.00112564	up	TDH-AS1
	1410	ENSG00000124466	1.1245	0.307359	0.00025359	0.000998863	up	LYPD3
	1411	ENSG00000198417	1.12301	0.116343	4.7896e-22	7.46087e-21	up	MT1F
	1412	ENSG00000259485	1.12251	0.310867	0.000305132	0.00118769	up	LINC02253
	1413	ENSG00000271369	1.12195	0.310317	0.000299787	0.00116844	up	NA
	1414	ENSG00000264734	1.12173	0.304697	0.000231895	0.000918512	up	LOC124903955
	1415	ENSG00000164764	1.12118	0.302505	0.000210294	0.00083849	up	SBSPON
	1416	ENSG00000111012	1.12034	0.198479	1.6554e-08	1.09627e-07	up	CYP27B1
	1417	ENSG00000137872	1.11982	0.196514	1.20916e-08	8.11151e-08	up	SEMA6D
	1418	ENSG00000119508	1.11884	0.16633	1.73638e-11	1.48055e-10	up	NR4A3
	1419	ENSG00000183638	1.1186	0.297591	0.000170693	0.000690236	up	RP1L1
	1420	ENSG00000112619	1.11855	0.287818	0.000101782	0.00042662	up	PRPH2
	1421	ENSG00000247121	1.11789	0.273357	4.3233e-05	0.000192305	up	NA
	1422	ENSG00000170837	1.11728	0.075765	3.23177e-49	1.19832e-47	up	GPR27
	1423	ENSG00000178718	1.11694	0.0463563	2.84709e-128	4.47069e-126	up	RPP25
	1424	ENSG00000275582	1.11675	0.300499	0.000202152	0.000808921	up	NA
	1425	ENSG00000165338	1.11649	0.108512	7.89548e-25	1.39419e-23	up	HECTD2
	1426	ENSG00000231646	1.11566	0.308317	0.000296266	0.00115606	up	FSIP2-AS2
	1427	ENSG00000277363	1.11489	0.170841	6.75844e-11	5.52313e-10	up	SRCIN1
	1428	ENSG00000092929	1.11452	0.310945	0.000337967	0.00130507	up	UNC13D
	1429	ENSG00000124212	1.11409	0.300043	0.000204727	0.000818295	up	PTGIS
	1430	ENSG00000271347	1.11304	0.276194	5.57976e-05	0.000243699	up	NA
	1431	ENSG00000187172	1.11181	0.307337	0.0002974	0.00115971	up	NA
	1432	ENSG00000267191	1.10919	0.310627	0.000355882	0.00136869	up	NA
	1433	ENSG00000144681	1.10871	0.127471	3.38418e-18	4.36252e-17	up	STAC
	1434	ENSG00000100604	1.10848	0.298533	0.00020474	0.000818295	up	CHGA
	1435	ENSG00000116661	1.10786	0.158549	2.79807e-12	2.5414e-11	up	FBXO2
	1436	ENSG00000269067	1.10775	0.218836	4.14894e-07	2.39651e-06	up	ZNF728
	1437	ENSG00000256008	1.10607	0.245581	6.67155e-06	3.33463e-05	up	NA
	1438	ENSG00000149591	1.10533	0.256479	1.63529e-05	7.75925e-05	up	TAGLN
	1439	ENSG00000140876	1.10525	0.22173	6.2065e-07	3.51181e-06	up	NUDT7
	1440	ENSG00000136842	1.10237	0.185852	3.00276e-09	2.13608e-08	up	TMOD1
	1441	ENSG00000135919	1.1022	0.111991	7.43064e-23	1.1957e-21	up	SERPINE2
	1442	ENSG00000196083	1.10217	0.107538	1.19337e-24	2.09149e-23	up	IL1RAP
	1443	ENSG00000106123	1.10213	0.147385	7.55319e-14	7.66917e-13	up	EPHB6
	1444	ENSG00000267745	1.10194	0.310913	0.00039379	0.00150032	up	NA
	1445	ENSG00000104518	1.10184	0.304788	0.000300226	0.00116995	up	GSDMD
	1446	ENSG00000278709	1.10184	0.310079	0.00038026	0.00145375	up	NKILA
	1447	ENSG00000196155	1.10126	0.0716517	2.6163e-53	1.06274e-51	up	PLEKHG4
	1448	ENSG00000261934	1.10119	0.275973	6.60165e-05	0.000284507	up	PCDHGA9
	1449	ENSG00000167377	1.10009	0.265321	3.37931e-05	0.000152755	up	ZNF23
	1450	ENSG00000155760	1.09985	0.0740652	6.98231e-50	2.65203e-48	up	FZD7
	1451	ENSG00000164736	1.09979	0.304816	0.000308506	0.00120042	up	SOX17
	1452	ENSG00000100968	1.09857	0.147817	1.07002e-13	1.07772e-12	up	NFATC4
	1453	ENSG00000107242	1.09841	0.305983	0.00033095	0.00127924	up	PIP5K1B
	1454	ENSG00000173988	1.09797	0.301882	0.000275753	0.0010807	up	LRRC63
	1455	ENSG00000279712	1.09778	0.308531	0.000373568	0.0014315	up	NA
	1456	ENSG00000234296	1.09754	0.30193	0.000277877	0.00108848	up	NA
	1457	ENSG00000159239	1.09753	0.299497	0.000247746	0.00097716	up	NA
	1458	ENSG00000006327	1.09735	0.199877	4.01633e-08	2.57523e-07	up	TNFRSF12A
	1459	ENSG00000168016	1.09561	0.280817	9.55984e-05	0.00040207	up	TRANK1
	1460	ENSG00000121743	1.09484	0.125247	2.30215e-18	2.98743e-17	up	GJA3
	1461	ENSG00000108852	1.09427	0.0925005	2.73555e-32	6.30578e-31	up	MPP2
	1462	ENSG00000184905	1.09139	0.177653	8.07888e-10	6.03517e-09	up	TCEAL2
	1463	ENSG00000131721	1.09126	0.261654	3.03782e-05	0.000138361	up	RHOXF2
	1464	ENSG00000155754	1.09105	0.299009	0.0002634	0.00103558	up	C2CD6
	1465	ENSG00000177272	1.09104	0.307706	0.00039152	0.00149314	up	KCNA3
	1466	ENSG00000274220	1.0899	0.295807	0.000229144	0.000908384	up	NA
	1467	ENSG00000254815	1.08881	0.237437	4.52494e-06	2.31157e-05	up	LMNTD2-AS1
	1468	ENSG00000099365	1.08857	0.247759	1.11459e-05	5.41261e-05	up	STX1B
	1469	ENSG00000168672	1.08808	0.096603	1.98788e-29	4.11232e-28	up	LRATD2
	1470	ENSG00000135547	1.08774	0.281393	0.000110841	0.000461779	up	HEY2
	1471	ENSG00000149403	1.08732	0.189101	8.92595e-09	6.05686e-08	up	GRIK4
	1472	ENSG00000182648	1.08654	0.309677	0.000450451	0.00169905	up	RNF32-DT
	1473	ENSG00000174599	1.08652	0.151694	7.91723e-13	7.49047e-12	up	TRAM1L1
	1474	ENSG00000114626	1.08625	0.28096	0.000110533	0.000460661	up	ABTB1
	1475	ENSG00000159374	1.08611	0.265394	4.26845e-05	0.000190082	up	M1AP
	1476	ENSG00000177301	1.0854	0.310982	0.000482568	0.0018094	up	KCNA2
	1477	ENSG00000169894	1.08393	0.194783	2.6245e-08	1.70761e-07	up	MUC3A
	1478	ENSG00000157111	1.08279	0.283266	0.000132085	0.000543509	up	TMEM171
	1479	ENSG00000070778	1.08216	0.166383	7.82033e-11	6.35541e-10	up	PTPN21
	1480	ENSG00000262456	1.08214	0.310949	0.000501155	0.00187338	up	NA
	1481	ENSG00000271141	1.0817	0.307743	0.000439858	0.00166124	up	NA
	1482	ENSG00000224902	1.08072	0.265067	4.55929e-05	0.000202072	up	GAGE12H
	1483	ENSG00000019144	1.07993	0.096431	4.12515e-29	8.45892e-28	up	PHLDB1
	1484	ENSG00000187566	1.07991	0.310441	0.000504002	0.00188313	up	NHLRC1
	1485	ENSG00000250284	1.0796	0.310588	0.000508966	0.00190046	up	CTB-1I21.1
	1486	ENSG00000168772	1.07931	0.117457	3.96782e-20	5.6469e-19	up	CXXC4
	1487	ENSG00000235493	1.07907	0.309595	0.000491337	0.00183874	up	NA
	1488	ENSG00000079841	1.07872	0.306143	0.000425769	0.00161141	up	RIMS1
	1489	ENSG00000259536	1.07797	0.311051	0.000529093	0.00196776	up	NA
	1490	ENSG00000231136	1.07794	0.290417	0.000205875	0.000822269	up	NA
	1491	ENSG00000232502	1.07762	0.309916	0.000506836	0.00189281	up	NA
	1492	ENSG00000205927	1.07734	0.175318	7.99463e-10	5.97605e-09	up	OLIG2
	1493	ENSG00000172382	1.07728	0.242188	8.66222e-06	4.27393e-05	up	PRSS27
	1494	ENSG00000165325	1.07598	0.308137	0.000479602	0.0018003	up	DEUP1
	1495	ENSG00000164900	1.07597	0.310849	0.000537413	0.00199648	up	GBX1
	1496	ENSG00000143850	1.07568	0.310044	0.000521568	0.00194348	up	PLEKHA6
	1497	ENSG00000162761	1.07544	0.307104	0.000461982	0.00173974	up	LMX1A
	1498	ENSG00000234028	1.07516	0.26635	5.42215e-05	0.0002373	up	EIF2AK3-DT
	1499	ENSG00000217801	1.07465	0.242354	9.24004e-06	4.53893e-05	up	NA
	1500	ENSG00000267272	1.074	0.264766	4.98319e-05	0.000219487	up	LINC01140
	1501	ENSG00000005379	1.07358	0.298417	0.000321192	0.00124523	up	TSPOAP1
	1502	ENSG00000119919	1.07336	0.2166	7.21387e-07	4.05631e-06	up	NKX2-3
	1503	ENSG00000130830	1.073	0.0645005	3.85652e-62	1.90361e-60	up	MPP1
	1504	ENSG00000185304	1.07277	0.302239	0.000386079	0.00147383	up	RGPD2
	1505	ENSG00000250992	1.07267	0.285362	0.000170595	0.000689961	up	NA
	1506	ENSG00000006016	1.07205	0.106812	1.05022e-23	1.76777e-22	up	CRLF1
	1507	ENSG00000235571	1.0714	0.310621	0.000562188	0.00208158	up	NA
	1508	ENSG00000103740	1.07081	0.243866	1.1285e-05	5.47336e-05	up	ACSBG1
	1509	ENSG00000253953	1.0707	0.295509	0.000290932	0.00113623	up	PCDHGB4
	1510	ENSG00000101680	1.07061	0.307161	0.000491215	0.00183858	up	LAMA1
	1511	ENSG00000140470	1.06905	0.15681	9.26404e-12	8.07867e-11	up	ADAMTS17
	1512	ENSG00000272796	1.06825	0.310749	0.000586769	0.00216677	up	NA
	1513	ENSG00000142606	1.06696	0.306105	0.000491054	0.00183827	up	MMEL1
	1514	ENSG00000206082	1.06544	0.296086	0.000320164	0.00124144	up	NA
	1515	ENSG00000271614	1.0653	0.304353	0.000464878	0.00174956	up	ATP2B1-AS1
	1516	ENSG00000187098	1.06518	0.134874	2.843e-15	3.13466e-14	up	MITF
	1517	ENSG00000115468	1.06405	0.104741	3.02518e-24	5.21978e-23	up	EFHD1
	1518	ENSG00000107317	1.06372	0.303345	0.000453803	0.00171114	up	PTGDS
	1519	ENSG00000134780	1.06364	0.142844	9.60711e-14	9.69704e-13	up	DAGLA
	1520	ENSG00000181804	1.06362	0.294003	0.000297213	0.00115918	up	SLC9A9
	1521	ENSG00000160211	1.06093	0.0488294	1.13398e-104	1.26341e-102	up	G6PD
	1522	ENSG00000254245	1.06059	0.31108	0.000651086	0.00238395	up	PCDHGA3
	1523	ENSG00000151617	1.06053	0.307172	0.000555267	0.00205726	up	EDNRA
	1524	ENSG00000107796	1.0599	0.231849	4.84213e-06	2.46446e-05	up	ACTA2
	1525	ENSG00000064886	1.05985	0.273983	0.000109597	0.000457083	up	CHI3L2
	1526	ENSG00000230267	1.05929	0.308381	0.000592518	0.00218493	up	NA
	1527	ENSG00000069696	1.05865	0.30515	0.000521888	0.00194405	up	DRD4
	1528	ENSG00000275591	1.05824	0.310277	0.0006481	0.00237413	up	XKR5
	1529	ENSG00000225366	1.05637	0.306842	0.00057591	0.00212902	up	CRIPTO3
	1530	ENSG00000184156	1.05598	0.310227	0.000664346	0.00242908	up	KCNQ3
	1531	ENSG00000278931	1.05465	0.307758	0.000610579	0.00224618	up	NA
	1532	ENSG00000166106	1.05421	0.253689	3.2455e-05	0.000147246	up	ADAMTS15
	1533	ENSG00000255314	1.05357	0.307547	0.000613193	0.0022551	up	LOC101928894
	1534	ENSG00000177807	1.05065	0.310944	0.000727777	0.00263956	up	KCNJ10
	1535	ENSG00000251095	1.04847	0.30919	0.000696369	0.00253468	up	NA
	1536	ENSG00000237412	1.04829	0.311023	0.000750404	0.00271259	up	PRSS56
	1537	ENSG00000186648	1.04673	0.255889	4.30338e-05	0.000191491	up	CARMIL3
	1538	ENSG00000158125	1.04659	0.304325	0.00058375	0.0021563	up	XDH
	1539	ENSG00000054219	1.04652	0.305762	0.000620097	0.00227583	up	LY75
	1540	ENSG00000258376	1.04524	0.286762	0.000267402	0.00104991	up	NA
	1541	ENSG00000104881	1.04444	0.181038	7.96763e-09	5.43495e-08	up	PPP1R13L
	1542	ENSG00000260804	1.04349	0.0876293	1.07509e-32	2.51037e-31	up	LINC01963
	1543	ENSG00000157766	1.04241	0.284257	0.000245281	0.00096858	up	ACAN
	1544	ENSG00000197558	1.04219	0.306449	0.000671707	0.00245446	up	SSPOP
	1545	ENSG00000150394	1.04179	0.287144	0.000285481	0.00111695	up	CDH8
	1546	ENSG00000163235	1.04177	0.288945	0.000311635	0.00121078	up	TGFA
	1547	ENSG00000279673	1.04154	0.225145	3.72612e-06	1.92238e-05	up	NA
	1548	ENSG00000236056	1.0415	0.302722	0.000580706	0.00214607	up	NA
	1549	ENSG00000173705	1.0415	0.0892082	1.71149e-31	3.83194e-30	up	SUSD5
	1550	ENSG00000251350	1.04109	0.310476	0.000798789	0.00286909	up	LINC02475
	1551	ENSG00000255394	1.03906	0.310238	0.000810352	0.00290616	up	NA
	1552	ENSG00000113721	1.03858	0.307645	0.000735735	0.00266594	up	PDGFRB
	1553	ENSG00000110148	1.03857	0.161851	1.39163e-10	1.10974e-09	up	CCKBR
	1554	ENSG00000214336	1.03724	0.19987	2.10787e-07	1.25395e-06	up	FOXI3
	1555	ENSG00000273387	1.03708	0.273222	0.000147202	0.000602007	up	NA
	1556	ENSG00000140009	1.03578	0.304554	0.00067144	0.00245387	up	ESR2
	1557	ENSG00000251363	1.03545	0.309813	0.000831188	0.0029745	up	NA
	1558	ENSG00000172572	1.03518	0.311121	0.000877035	0.00312662	up	PDE3A
	1559	ENSG00000184216	1.03469	0.0366346	1.70409e-175	5.178e-173	up	IRAK1
	1560	ENSG00000061455	1.03455	0.180826	1.05755e-08	7.12251e-08	up	PRDM6
	1561	ENSG00000103056	1.03338	0.309631	0.000845467	0.00302191	up	SMPD3
	1562	ENSG00000162639	1.03336	0.269152	0.000123377	0.000509739	up	HENMT1
	1563	ENSG00000279092	1.03334	0.303696	0.000667648	0.00244078	up	NA
	1564	ENSG00000223802	1.03286	0.177161	5.54182e-09	3.84639e-08	up	CERS1
	1565	ENSG00000124225	1.03169	0.232139	8.81866e-06	4.35021e-05	up	PMEPA1
	1566	ENSG00000177096	1.03163	0.309378	0.000854417	0.00305203	up	PHETA2
	1567	ENSG00000261409	1.03097	0.235154	1.16388e-05	5.63211e-05	up	NA
	1568	ENSG00000249550	1.03092	0.171824	1.9752e-09	1.42767e-08	up	LINC01234
	1569	ENSG00000260428	1.03038	0.2771	0.000200449	0.000802241	up	SCX
	1570	ENSG00000167751	1.02906	0.306004	0.000771302	0.00277847	up	KLK2
	1571	ENSG00000221890	1.02799	0.274595	0.000181357	0.000731085	up	NPTXR
	1572	ENSG00000270956	1.02759	0.301787	0.000661575	0.00241971	up	NA
	1573	ENSG00000269243	1.0265	0.301204	0.000654419	0.00239541	up	NA
	1574	ENSG00000100592	1.02636	0.0884115	3.71242e-31	8.20978e-30	up	DAAM1
	1575	ENSG00000158457	1.02596	0.0979859	1.17982e-25	2.15996e-24	up	TSPAN33
	1576	ENSG00000133433	1.02558	0.303105	0.000715448	0.00260008	up	GSTT2B
	1577	ENSG00000106686	1.02509	0.269337	0.000141245	0.000579166	up	SPATA6L
	1578	ENSG00000204642	1.02401	0.303417	0.000738314	0.00267487	up	HLA-F
	1579	ENSG00000175183	1.02388	0.0888465	9.96437e-31	2.16871e-29	up	CSRP2
	1580	ENSG00000170775	1.02376	0.171608	2.4365e-09	1.7476e-08	up	GPR37
	1581	ENSG00000163545	1.02372	0.2197	3.16821e-06	1.64726e-05	up	NUAK2
	1582	ENSG00000248685	1.0226	0.308807	0.000928143	0.00329226	up	NA
	1583	ENSG00000271122	1.02227	0.112589	1.0889e-19	1.51738e-18	up	HERPUD2-AS1
	1584	ENSG00000130762	1.02164	0.18855	6.01411e-08	3.79278e-07	up	ARHGEF16
	1585	ENSG00000275437	1.02108	0.244679	3.00449e-05	0.000137003	up	NA
	1586	ENSG00000108691	1.02066	0.232041	1.08947e-05	5.29615e-05	up	CCL2
	1587	ENSG00000240086	1.0203	0.30027	0.000678912	0.00247885	up	LOC102724019
	1588	ENSG00000267023	1.02026	0.307401	0.000903424	0.0032153	up	NA
	1589	ENSG00000171243	1.02004	0.308676	0.000951206	0.00336845	up	SOSTDC1
	1590	ENSG00000248475	1.0146	0.279889	0.00028896	0.00112942	up	NA
	1591	ENSG00000136160	1.01448	0.308652	0.00101329	0.00357155	up	EDNRB
	1592	ENSG00000065621	1.01424	0.237795	1.99743e-05	9.35613e-05	up	GSTO2
	1593	ENSG00000232721	1.01389	0.298529	0.000683068	0.00249092	up	NA
	1594	ENSG00000123119	1.0138	0.239576	2.31996e-05	0.000107656	up	NECAB1
	1595	ENSG00000065717	1.01361	0.133743	3.487e-14	3.60678e-13	up	TLE2
	1596	ENSG00000177989	1.01355	0.305272	0.000899714	0.00320259	up	CIMAP1B
	1597	ENSG00000224086	1.013	0.280728	0.000308	0.00119865	up	NA
	1598	ENSG00000187634	1.01166	0.145942	4.15044e-12	3.70641e-11	up	SAMD11
	1599	ENSG00000222004	1.01126	0.279104	0.000290941	0.00113623	up	LINC02860
	1600	ENSG00000085563	1.01106	0.0929522	1.48019e-27	2.8812e-26	up	ABCB1
	1601	ENSG00000245522	1.01073	0.290436	0.000501351	0.00187382	up	LINC02709
	1602	ENSG00000105227	1.01072	0.187556	7.08922e-08	4.43849e-07	up	PRX
	1603	ENSG00000145451	1.01061	0.309843	0.00110753	0.00387454	up	GLRA3
	1604	ENSG00000268658	1.01055	0.310701	0.00114404	0.00398973	up	LINC00664
	1605	ENSG00000151948	1.0098	0.29858	0.000719568	0.00261222	up	GLT1D1
	1606	ENSG00000115844	1.00885	0.14846	1.07983e-11	9.37815e-11	up	DLX2
	1607	ENSG00000154917	1.0082	0.130653	1.19497e-14	1.27724e-13	up	RAB6B
	1608	ENSG00000183935	1.00817	0.246111	4.196e-05	0.000187176	up	NA
	1609	ENSG00000135253	1.00741	0.297105	0.000696999	0.00253658	up	KCP
	1610	ENSG00000104765	1.00717	0.0799241	2.0686e-36	5.48743e-35	up	BNIP3L
	1611	ENSG00000114349	1.00689	0.28946	0.000504208	0.00188329	up	GNAT1
	1612	ENSG00000182511	1.00643	0.151472	3.04611e-11	2.55265e-10	up	FES
	1613	ENSG00000099139	1.00491	0.148075	1.14865e-11	9.94628e-11	up	PCSK5
	1614	ENSG00000280156	1.00417	0.303509	0.000937858	0.00332471	up	NA
	1615	ENSG00000105538	1.00317	0.302766	0.000921843	0.00327239	up	RASIP1
	1616	ENSG00000272234	1.00248	0.307229	0.00110253	0.00385991	up	NA
	1617	ENSG00000130294	1.00227	0.0402911	1.36484e-136	2.45639e-134	up	KIF1A
	1618	ENSG00000272163	1.00186	0.300976	0.00087247	0.00311224	up	NA
	1619	ENSG00000261490	1.00053	0.235883	2.21899e-05	0.000103201	up	NA
	1620	ENSG00000274422	1.0004	0.232453	1.68004e-05	7.95544e-05	up	NA
	1621	ENSG00000182809	1.00034	0.16792	2.56544e-09	1.83783e-08	up	CRIP2
	1622	ENSG00000115414	0.999881	0.0640853	7.01734e-55	2.95296e-53	unchanged	FN1
	1623	ENSG00000165349	0.999314	0.0535185	8.31895e-78	5.89814e-76	unchanged	SLC7A3
	1624	ENSG00000270246	0.999204	0.28571	0.000470048	0.00176755	unchanged	NA
	1625	ENSG00000131435	0.999105	0.282176	0.000399046	0.00151837	unchanged	PDLIM4
	1626	ENSG00000235532	0.998921	0.305335	0.00106958	0.00375469	unchanged	LINC00402
	1627	ENSG00000229544	0.99879	0.310649	0.00130368	0.00448101	unchanged	NKX1-2
	1628	ENSG00000196218	0.997527	0.267944	0.000196952	0.000789192	unchanged	RYR1
	1629	ENSG00000078114	0.997469	0.138059	5.01329e-13	4.81115e-12	unchanged	NEBL
	1630	ENSG00000134207	0.996667	0.112125	6.1704e-19	8.25909e-18	unchanged	SYT6
	1631	ENSG00000111452	0.995365	0.303463	0.00103801	0.00365098	unchanged	ADGRD1
	1632	ENSG00000129152	0.995155	0.287153	0.000529057	0.00196776	unchanged	MYOD1
	1633	ENSG00000165124	0.994192	0.268973	0.000218802	0.000870188	unchanged	SVEP1
	1634	ENSG00000260793	0.99394	0.270076	0.000233023	0.000922512	unchanged	ATXN7L3-AS1
	1635	ENSG00000166111	0.993902	0.296664	0.000807345	0.00289627	unchanged	SVOP
	1636	ENSG00000134013	0.991753	0.204132	1.18348e-06	6.47715e-06	unchanged	LOXL2
	1637	ENSG00000136167	0.991701	0.287241	0.000555407	0.00205745	unchanged	LCP1
	1638	ENSG00000272599	0.990494	0.143298	4.77437e-12	4.24254e-11	unchanged	NA
	1639	ENSG00000180116	0.990487	0.299603	0.000946409	0.00335299	unchanged	REDIC1
	1640	ENSG00000250654	0.9897	0.296379	0.000839872	0.00300374	unchanged	NA
	1641	ENSG00000158186	0.989184	0.101668	2.25588e-22	3.56386e-21	unchanged	MRAS
	1642	ENSG00000187122	0.988546	0.243032	4.75095e-05	0.000210009	unchanged	SLIT1
	1643	ENSG00000242615	0.987817	0.298572	0.000938056	0.00332491	unchanged	RPL17P47
	1644	ENSG00000156959	0.987679	0.307036	0.00129623	0.00445802	unchanged	LHFPL4
	1645	ENSG00000227012	0.987366	0.307532	0.00132451	0.00454727	unchanged	NA
	1646	ENSG00000112812	0.987072	0.175562	1.88355e-08	1.23721e-07	unchanged	PRSS16
	1647	ENSG00000272462	0.986695	0.215547	4.70242e-06	2.39753e-05	unchanged	LINC02980
	1648	ENSG00000188599	0.985101	0.220856	8.18145e-06	4.04782e-05	unchanged	NPIPP1
	1649	ENSG00000162782	0.985029	0.217951	6.19895e-06	3.11104e-05	unchanged	TDRD5
	1650	ENSG00000196782	0.984876	0.115178	1.22152e-17	1.52834e-16	unchanged	MAML3
	1651	ENSG00000159166	0.98486	0.294258	0.000817135	0.00292825	unchanged	LAD1
	1652	ENSG00000072818	0.984813	0.28173	0.000473004	0.00177781	unchanged	ACAP1
	1653	ENSG00000250320	0.984486	0.309885	0.0014884	0.00506531	unchanged	EDIL3-DT
	1654	ENSG00000134588	0.984105	0.304726	0.00124016	0.00428534	unchanged	USP26
	1655	ENSG00000173947	0.983987	0.309679	0.00148582	0.00505806	unchanged	CIMAP3
	1656	ENSG00000146233	0.983659	0.243254	5.26015e-05	0.000230817	unchanged	CYP39A1
	1657	ENSG00000229404	0.982957	0.310241	0.00153299	0.00520721	unchanged	LINC00858
	1658	ENSG00000183048	0.982311	0.103598	2.49609e-21	3.76053e-20	unchanged	SLC25A10
	1659	ENSG00000179588	0.981295	0.258198	0.000144376	0.000591379	unchanged	ZFPM1
	1660	ENSG00000101951	0.980985	0.27759	0.000409419	0.0015538	unchanged	PAGE4
	1661	ENSG00000168913	0.979968	0.17058	9.19637e-09	6.22952e-08	unchanged	ENHO
	1662	ENSG00000256364	0.979853	0.271633	0.000309443	0.00120366	unchanged	NA
	1663	ENSG00000180044	0.979724	0.194028	4.43199e-07	2.55093e-06	unchanged	C3orf80
	1664	ENSG00000215533	0.979516	0.301538	0.00116054	0.00403826	unchanged	LINC00189
	1665	ENSG00000197852	0.979395	0.144835	1.35964e-11	1.16868e-10	unchanged	INKA2
	1666	ENSG00000177943	0.979386	0.153645	1.83772e-10	1.4479e-09	unchanged	MAMDC4
	1667	ENSG00000230623	0.97881	0.305973	0.001379	0.00471909	unchanged	NA
	1668	ENSG00000137767	0.978783	0.285329	0.000602758	0.00221985	unchanged	SQOR
	1669	ENSG00000163440	0.978636	0.290018	0.000739785	0.00267979	unchanged	PDCL2
	1670	ENSG00000058085	0.978159	0.301	0.00115526	0.00402288	unchanged	LAMC2
	1671	ENSG00000104093	0.978051	0.0621916	9.96894e-56	4.27969e-54	unchanged	DMXL2
	1672	ENSG00000263873	0.977298	0.274678	0.000373718	0.00143178	unchanged	NA
	1673	ENSG00000277969	0.975386	0.174753	2.38424e-08	1.55648e-07	unchanged	NA
	1674	ENSG00000167612	0.974365	0.291718	0.000837499	0.00299571	unchanged	ANKRD33
	1675	ENSG00000142273	0.97407	0.289298	0.000759882	0.00274282	unchanged	CBLC
	1676	ENSG00000106278	0.973567	0.28082	0.00052656	0.00195959	unchanged	PTPRZ1
	1677	ENSG00000278451	0.972862	0.309123	0.00164862	0.00556846	unchanged	NA
	1678	ENSG00000260841	0.971602	0.308864	0.00165675	0.0055935	unchanged	NA
	1679	ENSG00000168070	0.971446	0.289077	0.000778003	0.00280045	unchanged	MAJIN
	1680	ENSG00000259877	0.97105	0.204862	2.13703e-06	1.12995e-05	unchanged	ZNF778-DT
	1681	ENSG00000129354	0.97081	0.302558	0.00133348	0.00457487	unchanged	AP1M2
	1682	ENSG00000076344	0.970292	0.310597	0.00178436	0.00598377	unchanged	RGS11
	1683	ENSG00000049540	0.969506	0.299154	0.00119187	0.00413434	unchanged	ELN
	1684	ENSG00000198400	0.969028	0.268054	0.000300287	0.00116999	unchanged	NTRK1
	1685	ENSG00000160097	0.967312	0.168211	8.89256e-09	6.03771e-08	unchanged	FNDC5
	1686	ENSG00000112379	0.966689	0.0832282	3.46124e-31	7.67607e-30	unchanged	ARFGEF3
	1687	ENSG00000272525	0.966412	0.277013	0.000485399	0.00181914	unchanged	BTF3-DT
	1688	ENSG00000196843	0.966393	0.133127	3.89375e-13	3.763e-12	unchanged	ARID5A
	1689	ENSG00000083799	0.965784	0.08723	1.72127e-28	3.45095e-27	unchanged	CYLD
	1690	ENSG00000182749	0.965126	0.151343	1.80481e-10	1.42466e-09	unchanged	PAQR7
	1691	ENSG00000133874	0.964791	0.189748	3.68411e-07	2.1357e-06	unchanged	RNF122
	1692	ENSG00000247134	0.963363	0.142353	1.31107e-11	1.12942e-10	unchanged	NA
	1693	ENSG00000225255	0.962794	0.299427	0.00130237	0.00447782	unchanged	NA
	1694	ENSG00000213398	0.961516	0.242422	7.29996e-05	0.000312186	unchanged	LCAT
	1695	ENSG00000272143	0.961077	0.272992	0.000430685	0.00162975	unchanged	FGF14-AS2
	1696	ENSG00000215548	0.961002	0.304246	0.00158513	0.00537263	unchanged	NA
	1697	ENSG00000262576	0.960657	0.289558	0.000907722	0.00322864	unchanged	PCDHGA4
	1698	ENSG00000253731	0.960535	0.209186	4.39508e-06	2.25015e-05	unchanged	PCDHGA6
	1699	ENSG00000138378	0.960334	0.307561	0.00179374	0.0060109	unchanged	STAT4
	1700	ENSG00000132702	0.959635	0.311229	0.00204669	0.00678279	unchanged	HAPLN2
	1701	ENSG00000186994	0.958866	0.247299	0.0001056	0.000441278	unchanged	KANK3
	1702	ENSG00000144118	0.958283	0.0868855	2.76089e-28	5.50696e-27	unchanged	RALB
	1703	ENSG00000088386	0.95617	0.303046	0.00160386	0.00543062	unchanged	SLC15A1
	1704	ENSG00000166685	0.95563	0.0775555	6.90603e-35	1.7544e-33	unchanged	COG1
	1705	ENSG00000273447	0.954788	0.310615	0.00211305	0.00697209	unchanged	NA
	1706	ENSG00000176593	0.953398	0.206545	3.9131e-06	2.01352e-05	unchanged	ZNF606-AS1
	1707	ENSG00000140254	0.95318	0.296151	0.00128838	0.00443491	unchanged	DUOXA1
	1708	ENSG00000107742	0.952325	0.277201	0.000591468	0.00218171	unchanged	SPOCK2
	1709	ENSG00000124067	0.951926	0.10964	3.8786e-18	4.98888e-17	unchanged	SLC12A4
	1710	ENSG00000249721	0.951344	0.307258	0.00195996	0.00651844	unchanged	NA
	1711	ENSG00000103024	0.950727	0.106414	4.10082e-19	5.53008e-18	unchanged	NME3
	1712	ENSG00000178033	0.950254	0.3093	0.00212437	0.00700646	unchanged	CALHM5
	1713	ENSG00000130940	0.949907	0.140423	1.33684e-11	1.15035e-10	unchanged	CASZ1
	1714	ENSG00000203808	0.949827	0.307394	0.00200203	0.00664512	unchanged	BVES-AS1
	1715	ENSG00000110675	0.949729	0.156745	1.36896e-09	1.00375e-08	unchanged	ELMOD1
	1716	ENSG00000275340	0.948995	0.293233	0.00121082	0.00419448	unchanged	NA
	1717	ENSG00000006747	0.948786	0.307993	0.00206625	0.00684082	unchanged	SCIN
	1718	ENSG00000147509	0.948322	0.213485	8.9087e-06	4.39035e-05	unchanged	RGS20
	1719	ENSG00000237080	0.947776	0.310444	0.00226587	0.00743958	unchanged	EHMT2-AS1
	1720	ENSG00000105516	0.947551	0.116579	4.3657e-16	5.02679e-15	unchanged	DBP
	1721	ENSG00000123384	0.947355	0.0782387	9.52031e-34	2.3011e-32	unchanged	LRP1
	1722	ENSG00000123572	0.946278	0.31083	0.00233176	0.00763666	unchanged	NRK
	1723	ENSG00000101298	0.946028	0.228204	3.39011e-05	0.000153154	unchanged	SNPH
	1724	ENSG00000226933	0.945042	0.280127	0.000741875	0.00268694	unchanged	NA
	1725	ENSG00000257893	0.944926	0.266867	0.00039889	0.00151803	unchanged	LINC02404
	1726	ENSG00000224679	0.944757	0.293832	0.0013031	0.00447968	unchanged	NA
	1727	ENSG00000181652	0.94367	0.223025	2.32417e-05	0.000107787	unchanged	ATG9B
	1728	ENSG00000114646	0.942737	0.188126	5.40881e-07	3.07908e-06	unchanged	CSPG5
	1729	ENSG00000228737	0.942475	0.306204	0.00208445	0.00689143	unchanged	NA
	1730	ENSG00000240137	0.942164	0.309161	0.00230766	0.00756407	unchanged	ERICH6-AS1
	1731	ENSG00000198736	0.942127	0.08373	2.26511e-29	4.67343e-28	unchanged	MSRB1
	1732	ENSG00000142694	0.941737	0.205665	4.6722e-06	2.38472e-05	unchanged	EVA1B
	1733	ENSG00000105655	0.941648	0.0610965	1.34985e-53	5.5603e-52	unchanged	ISYNA1
	1734	ENSG00000273038	0.941435	0.271912	0.000535629	0.00199049	unchanged	NA
	1735	ENSG00000226468	0.941071	0.30951	0.0023617	0.00773144	unchanged	NA
	1736	ENSG00000176371	0.940999	0.126153	8.70548e-14	8.81359e-13	unchanged	ZSCAN2
	1737	ENSG00000172782	0.940823	0.291402	0.00124394	0.00429593	unchanged	FADS6
	1738	ENSG00000256802	0.940556	0.279906	0.000778699	0.00280253	unchanged	LCIIAR
	1739	ENSG00000157542	0.940128	0.295429	0.00146138	0.00498498	unchanged	KCNJ6
	1740	ENSG00000242094	0.939924	0.29181	0.00127738	0.00440095	unchanged	NA
	1741	ENSG00000128512	0.939923	0.106699	1.26131e-18	1.65884e-17	unchanged	DOCK4
	1742	ENSG00000225339	0.939257	0.288433	0.00112831	0.00394015	unchanged	NA
	1743	ENSG00000099250	0.938201	0.0757406	3.07208e-35	7.88129e-34	unchanged	NRP1
	1744	ENSG00000010704	0.936944	0.301286	0.00187201	0.00625171	unchanged	HFE
	1745	ENSG00000157470	0.936924	0.125764	9.34451e-14	9.44829e-13	unchanged	FAM81A
	1746	ENSG00000116285	0.936584	0.13543	4.65737e-12	4.14329e-11	unchanged	ERRFI1
	1747	ENSG00000164889	0.936282	0.0452253	3.28187e-95	3.0962e-93	unchanged	SLC4A2
	1748	ENSG00000259755	0.935078	0.308965	0.00247416	0.00806574	unchanged	NA
	1749	ENSG00000196660	0.935035	0.274845	0.000668833	0.00244472	unchanged	SLC30A10
	1750	ENSG00000279694	0.934457	0.300615	0.0018805	0.00627378	unchanged	NA
	1751	ENSG00000222030	0.934305	0.309787	0.00256171	0.00832103	unchanged	LINC01793
	1752	ENSG00000265688	0.934047	0.194109	1.49446e-06	8.06605e-06	unchanged	MILIP
	1753	ENSG00000188176	0.933829	0.22487	3.28494e-05	0.000148834	unchanged	SMTNL2
	1754	ENSG00000269883	0.932128	0.268994	0.00052977	0.00196996	unchanged	NA
	1755	ENSG00000116785	0.931144	0.301017	0.00197927	0.00657668	unchanged	CFHR3
	1756	ENSG00000181965	0.931139	0.299294	0.00186384	0.00622796	unchanged	NEUROG1
	1757	ENSG00000183304	0.931009	0.293675	0.00152335	0.00517749	unchanged	FAM9A
	1758	ENSG00000184814	0.930727	0.268808	0.000535338	0.00198972	unchanged	PRR23B
	1759	ENSG00000179292	0.929626	0.306093	0.00238892	0.00781182	unchanged	TMEM151A
	1760	ENSG00000170175	0.928572	0.221031	2.6563e-05	0.000122101	unchanged	CHRNB1
	1761	ENSG00000064042	0.928153	0.0748235	2.46874e-35	6.34041e-34	unchanged	LIMCH1
	1762	ENSG00000164112	0.927541	0.279361	0.000899456	0.00320216	unchanged	SMIM43
	1763	ENSG00000175984	0.927498	0.148923	4.72327e-10	3.60086e-09	unchanged	DENND2C
	1764	ENSG00000104154	0.927033	0.126349	2.18346e-13	2.14649e-12	unchanged	SLC30A4
	1765	ENSG00000173221	0.926538	0.173641	9.50448e-08	5.87986e-07	unchanged	GLRX
	1766	ENSG00000204118	0.924776	0.306306	0.0025351	0.00824375	unchanged	NA
	1767	ENSG00000250421	0.924705	0.307428	0.00263083	0.00852541	unchanged	NA
	1768	ENSG00000139219	0.92461	0.0407847	8.75184e-114	1.12509e-111	unchanged	COL2A1
	1769	ENSG00000130775	0.924479	0.151735	1.10992e-09	8.19207e-09	unchanged	THEMIS2
	1770	ENSG00000271011	0.923196	0.299717	0.00206844	0.00684418	unchanged	NA
	1771	ENSG00000130589	0.92248	0.14276	1.03505e-10	8.3536e-10	unchanged	HELZ2
	1772	ENSG00000260285	0.921568	0.242004	0.000140057	0.000574596	unchanged	NA
	1773	ENSG00000205642	0.921083	0.306607	0.0026635	0.00861935	unchanged	VCX3B
	1774	ENSG00000218672	0.921035	0.30511	0.0025386	0.00825282	unchanged	NA
	1775	ENSG00000224383	0.920866	0.283612	0.00116661	0.00405755	unchanged	PRR29
	1776	ENSG00000246145	0.920556	0.305907	0.00261877	0.0084922	unchanged	RRS1-DT
	1777	ENSG00000153071	0.920391	0.111087	1.17787e-16	1.40176e-15	unchanged	DAB2
	1778	ENSG00000273274	0.920213	0.249074	0.000220293	0.000875669	unchanged	ZBTB8B
	1779	ENSG00000262745	0.919988	0.306548	0.00268989	0.00869514	unchanged	NA
	1780	ENSG00000187800	0.919625	0.303045	0.00240845	0.00787018	unchanged	PEAR1
	1781	ENSG00000175806	0.919404	0.227658	5.37855e-05	0.000235527	unchanged	MSRA
	1782	ENSG00000142961	0.919008	0.243945	0.000165043	0.000669472	unchanged	MOB3C
	1783	ENSG00000272872	0.918684	0.306422	0.00271671	0.00877635	unchanged	NA
	1784	ENSG00000069702	0.918465	0.0914696	1.00443e-23	1.69313e-22	unchanged	TGFBR3
	1785	ENSG00000041353	0.918436	0.310734	0.00311964	0.00993739	unchanged	RAB27B
	1786	ENSG00000183722	0.918172	0.108485	2.59245e-17	3.2059e-16	unchanged	LHFPL6
	1787	ENSG00000100167	0.916477	0.115234	1.81781e-15	2.02819e-14	unchanged	SEPTIN3
	1788	ENSG00000273489	0.916077	0.282443	0.0011811	0.00410064	unchanged	NA
	1789	ENSG00000258815	0.915568	0.311194	0.00325984	0.0103306	unchanged	NA
	1790	ENSG00000227932	0.915353	0.246592	0.000205623	0.000821405	unchanged	NA
	1791	ENSG00000181378	0.915237	0.300033	0.00228494	0.00749902	unchanged	CFAP65
	1792	ENSG00000076944	0.914783	0.14199	1.17456e-10	9.43074e-10	unchanged	STXBP2
	1793	ENSG00000255425	0.913552	0.297288	0.00211952	0.00699246	unchanged	OR8G3P
	1794	ENSG00000235726	0.913345	0.308532	0.00307348	0.00980238	unchanged	NA
	1795	ENSG00000269951	0.913306	0.168415	5.86225e-08	3.69932e-07	unchanged	NA
	1796	ENSG00000047346	0.91277	0.120956	4.47876e-14	4.61221e-13	unchanged	ATOSA
	1797	ENSG00000132535	0.912354	0.229172	6.86001e-05	0.000294881	unchanged	DLG4
	1798	ENSG00000139626	0.911974	0.310674	0.00333041	0.01052	unchanged	ITGB7
	1799	ENSG00000088992	0.91068	0.125669	4.27258e-13	4.11212e-12	unchanged	TESC
	1800	ENSG00000111879	0.910571	0.0998165	7.34436e-20	1.02957e-18	unchanged	FAM184A
	1801	ENSG00000026103	0.910552	0.128671	1.47724e-12	1.36505e-11	unchanged	FAS
	1802	ENSG00000187942	0.910471	0.310434	0.00335815	0.0105976	unchanged	LDLRAD2
	1803	ENSG00000165181	0.909739	0.302597	0.00264327	0.00856218	unchanged	SHOC1
	1804	ENSG00000154265	0.908526	0.165585	4.09373e-08	2.62198e-07	unchanged	ABCA5
	1805	ENSG00000168528	0.907995	0.189629	1.68219e-06	9.01886e-06	unchanged	SERINC2
	1806	ENSG00000232533	0.906796	0.283043	0.00135657	0.0046464	unchanged	NA
	1807	ENSG00000167065	0.906776	0.204968	9.68921e-06	4.74364e-05	unchanged	DUSP18
	1808	ENSG00000166016	0.906632	0.108463	6.33007e-17	7.65794e-16	unchanged	ABTB2
	1809	ENSG00000240280	0.906376	0.297698	0.00232979	0.00763232	unchanged	NA
	1810	ENSG00000215559	0.906054	0.228926	7.56274e-05	0.000322364	unchanged	NA
	1811	ENSG00000072133	0.906016	0.0957479	3.00629e-21	4.51755e-20	unchanged	RPS6KA6
	1812	ENSG00000278970	0.905863	0.295632	0.00218287	0.00718827	unchanged	ZFP62
	1813	ENSG00000115556	0.905722	0.308606	0.00333677	0.0105387	unchanged	PLCD4
	1814	ENSG00000229666	0.905333	0.305511	0.00304319	0.00972006	unchanged	NA
	1815	ENSG00000188095	0.904445	0.30853	0.00337372	0.010641	unchanged	MESP2
	1816	ENSG00000157551	0.90355	0.296791	0.0023315	0.00763666	unchanged	KCNJ15
	1817	ENSG00000204282	0.903302	0.304347	0.00299747	0.00959528	unchanged	NA
	1818	ENSG00000142700	0.90282	0.143316	2.98564e-10	2.31692e-09	unchanged	DMRTA2
	1819	ENSG00000064787	0.90227	0.301938	0.00280569	0.009037	unchanged	BCAS1
	1820	ENSG00000272779	0.902256	0.218522	3.64507e-05	0.00016385	unchanged	NA
	1821	ENSG00000087086	0.902114	0.0496958	1.22196e-73	7.85443e-72	unchanged	FTL
	1822	ENSG00000183798	0.901491	0.0807301	5.93329e-29	1.20924e-27	unchanged	EMILIN3
	1823	ENSG00000106524	0.901416	0.0791761	4.97011e-30	1.04667e-28	unchanged	ANKMY2
	1824	ENSG00000260518	0.900632	0.307726	0.0034254	0.0107837	unchanged	NA
	1825	ENSG00000185634	0.89918	0.30799	0.00350579	0.011016	unchanged	SHC4
	1826	ENSG00000179277	0.898866	0.27599	0.00112643	0.00393535	unchanged	NA
	1827	ENSG00000110169	0.89876	0.30445	0.00315641	0.0100422	unchanged	HPX
	1828	ENSG00000228835	0.898753	0.298182	0.00257735	0.0083699	unchanged	NA
	1829	ENSG00000161681	0.897419	0.253121	0.000391998	0.00149398	unchanged	SHANK1
	1830	ENSG00000120093	0.896404	0.130394	6.21607e-12	5.47787e-11	unchanged	HOXB3
	1831	ENSG00000154027	0.896322	0.269147	0.000867755	0.00309637	unchanged	AK5
	1832	ENSG00000119715	0.896269	0.308721	0.00369414	0.0115584	unchanged	ESRRB
	1833	ENSG00000175573	0.896145	0.107094	5.86822e-17	7.11762e-16	unchanged	C11orf68
	1834	ENSG00000120885	0.894511	0.0606211	2.8245e-49	1.05063e-47	unchanged	CLU
	1835	ENSG00000272405	0.894464	0.309912	0.00389939	0.0121145	unchanged	NA
	1836	ENSG00000151967	0.893707	0.283943	0.00164681	0.00556396	unchanged	SCHIP1
	1837	ENSG00000187600	0.893672	0.310075	0.00395015	0.0122575	unchanged	LINC02583
	1838	ENSG00000048052	0.893613	0.0431919	4.31737e-95	4.05677e-93	unchanged	HDAC9
	1839	ENSG00000154310	0.893534	0.0787873	8.21186e-30	1.71241e-28	unchanged	TNIK
	1840	ENSG00000135406	0.893442	0.24054	0.000203746	0.000814602	unchanged	PRPH
	1841	ENSG00000223561	0.892941	0.307854	0.00372534	0.0116495	unchanged	LINC03007
	1842	ENSG00000204740	0.891834	0.292909	0.00232876	0.00763004	unchanged	MALRD1
	1843	ENSG00000149564	0.891675	0.174574	3.26067e-07	1.90202e-06	unchanged	ESAM
	1844	ENSG00000175898	0.891645	0.255914	0.000493686	0.00184665	unchanged	NA
	1845	ENSG00000165548	0.891588	0.19836	6.96387e-06	3.47036e-05	unchanged	TMEM63C
	1846	ENSG00000172201	0.891385	0.310499	0.00409415	0.0126674	unchanged	ID4
	1847	ENSG00000135678	0.890954	0.213686	3.05323e-05	0.000139008	unchanged	CPM
	1848	ENSG00000265933	0.890873	0.293323	0.00238807	0.00781013	unchanged	LINC00668
	1849	ENSG00000278022	0.890814	0.311241	0.00420798	0.0129921	unchanged	NA
	1850	ENSG00000140807	0.890089	0.117353	3.33153e-14	3.45207e-13	unchanged	NKD1
	1851	ENSG00000244306	0.89005	0.259901	0.000615758	0.00226346	unchanged	NA
	1852	ENSG00000107736	0.889571	0.256552	0.000525506	0.0019566	unchanged	CDH23
	1853	ENSG00000197479	0.888398	0.279244	0.00146546	0.00499742	unchanged	PCDHB11
	1854	ENSG00000189299	0.887534	0.299431	0.00303604	0.00970677	unchanged	FOXR2
	1855	ENSG00000234456	0.887161	0.101956	3.27695e-18	4.22661e-17	unchanged	MAGI2-AS3
	1856	ENSG00000197291	0.886951	0.279042	0.0014801	0.00504221	unchanged	RAMP2-AS1
	1857	ENSG00000228214	0.88647	0.235052	0.000162345	0.000659101	unchanged	NA
	1858	ENSG00000168026	0.886461	0.249377	0.000378417	0.00144765	unchanged	TTC21A
	1859	ENSG00000278804	0.88614	0.300289	0.00316793	0.010072	unchanged	NA
	1860	ENSG00000179988	0.886067	0.155798	1.29066e-08	8.63778e-08	unchanged	PSTK
	1861	ENSG00000100626	0.885966	0.203934	1.39667e-05	6.6744e-05	unchanged	GALNT16
	1862	ENSG00000198246	0.885564	0.159383	2.75729e-08	1.79002e-07	unchanged	SLC29A3
	1863	ENSG00000172379	0.885391	0.0895354	4.65892e-23	7.59616e-22	unchanged	ARNT2
	1864	ENSG00000244968	0.883502	0.269296	0.00103519	0.00364271	unchanged	LIFR-AS1
	1865	ENSG00000278200	0.883377	0.309089	0.00426323	0.0131488	unchanged	NA
	1866	ENSG00000102935	0.883377	0.233117	0.000151001	0.000615928	unchanged	ZNF423
	1867	ENSG00000255318	0.882849	0.308914	0.00426434	0.0131505	unchanged	NA
	1868	ENSG00000280187	0.882438	0.224952	8.75304e-05	0.000370669	unchanged	NA
	1869	ENSG00000236204	0.881818	0.311185	0.00460062	0.0140799	unchanged	LINC01376
	1870	ENSG00000148180	0.881763	0.119562	1.64387e-13	1.63666e-12	unchanged	GSN
	1871	ENSG00000163508	0.881436	0.173289	3.64737e-07	2.11651e-06	unchanged	EOMES
	1872	ENSG00000100003	0.880944	0.204495	1.64811e-05	7.81373e-05	unchanged	SEC14L2
	1873	ENSG00000133454	0.879806	0.31069	0.00462893	0.0141517	unchanged	MYO18B
	1874	ENSG00000157423	0.879228	0.294422	0.00282389	0.00908935	unchanged	HYDIN
	1875	ENSG00000147394	0.877674	0.127254	5.31046e-12	4.7064e-11	unchanged	ZNF185
	1876	ENSG00000157429	0.877335	0.267229	0.0010268	0.00361698	unchanged	ZNF19
	1877	ENSG00000263551	0.877326	0.305094	0.00403276	0.0124857	unchanged	NA
	1878	ENSG00000115339	0.875447	0.299323	0.0034473	0.0108482	unchanged	GALNT3
	1879	ENSG00000001561	0.87464	0.116166	5.10328e-14	5.24151e-13	unchanged	ENPP4
	1880	ENSG00000147234	0.87443	0.233936	0.000185566	0.00074651	unchanged	FRMPD3
	1881	ENSG00000204764	0.874135	0.266589	0.00104192	0.00366252	unchanged	RANBP17
	1882	ENSG00000072858	0.874106	0.308443	0.00459792	0.0140735	unchanged	SIDT1
	1883	ENSG00000070182	0.87347	0.14032	4.82021e-10	3.66998e-09	unchanged	SPTB
	1884	ENSG00000167100	0.873416	0.295798	0.00314959	0.0100246	unchanged	SAMD14
	1885	ENSG00000157992	0.872292	0.275493	0.00154392	0.00524132	unchanged	KRTCAP3
	1886	ENSG00000232729	0.871828	0.294208	0.00304352	0.00972006	unchanged	GTF2I-AS1
	1887	ENSG00000170537	0.871818	0.16839	2.25013e-07	1.33553e-06	unchanged	TMC7
	1888	ENSG00000264324	0.871288	0.282496	0.00204064	0.00676562	unchanged	NA
	1889	ENSG00000245156	0.871114	0.292603	0.00290966	0.00933206	unchanged	NA
	1890	ENSG00000141837	0.870916	0.290875	0.00275233	0.00888346	unchanged	CACNA1A
	1891	ENSG00000225778	0.870762	0.305112	0.00431852	0.0133	unchanged	PROSER2-AS1
	1892	ENSG00000148677	0.870725	0.311349	0.00516394	0.0156099	unchanged	ANKRD1
	1893	ENSG00000095303	0.870642	0.309619	0.00492376	0.0149709	unchanged	PTGS1
	1894	ENSG00000239620	0.870631	0.283397	0.00212542	0.00700894	unchanged	PRR20G
	1895	ENSG00000100314	0.870318	0.305605	0.00440151	0.0135254	unchanged	CABP7
	1896	ENSG00000185483	0.870025	0.244538	0.000373926	0.00143211	unchanged	ROR1
	1897	ENSG00000124507	0.869768	0.158485	4.06465e-08	2.60478e-07	unchanged	PACSIN1
	1898	ENSG00000132692	0.868846	0.275133	0.00158905	0.00538358	unchanged	BCAN
	1899	ENSG00000008300	0.86836	0.127616	1.01415e-11	8.8208e-11	unchanged	CELSR3
	1900	ENSG00000128242	0.867819	0.26485	0.00105051	0.00369161	unchanged	GAL3ST1
	1901	ENSG00000203722	0.867449	0.309112	0.00501197	0.0152016	unchanged	RAET1G
	1902	ENSG00000225882	0.865289	0.301669	0.00412637	0.0127603	unchanged	LINC01456
	1903	ENSG00000230798	0.864696	0.22019	8.59936e-05	0.000364756	unchanged	FOXD3-AS1
	1904	ENSG00000118231	0.864497	0.243293	0.000380411	0.00145409	unchanged	CRYGD
	1905	ENSG00000182050	0.86432	0.226084	0.000131831	0.000542558	unchanged	MGAT4C
	1906	ENSG00000275038	0.864137	0.308761	0.00513044	0.0155147	unchanged	NA
	1907	ENSG00000187902	0.863978	0.296332	0.00355035	0.0111425	unchanged	SHISA7
	1908	ENSG00000168079	0.863828	0.307243	0.00493035	0.0149871	unchanged	SCARA5
	1909	ENSG00000249395	0.863558	0.185711	3.31935e-06	1.7224e-05	unchanged	CASC9
	1910	ENSG00000236719	0.863301	0.284619	0.00241992	0.00790435	unchanged	OVAAL
	1911	ENSG00000030419	0.862748	0.191806	6.85896e-06	3.42392e-05	unchanged	IKZF2
	1912	ENSG00000205403	0.862541	0.300345	0.00408101	0.0126301	unchanged	CFI
	1913	ENSG00000151490	0.861616	0.302866	0.00444286	0.0136363	unchanged	PTPRO
	1914	ENSG00000081479	0.861175	0.186289	3.78596e-06	1.95239e-05	unchanged	LRP2
	1915	ENSG00000188730	0.860885	0.307938	0.0051797	0.0156474	unchanged	VWC2
	1916	ENSG00000178401	0.860784	0.106704	7.20145e-16	8.21513e-15	unchanged	DNAJC22
	1917	ENSG00000260304	0.860348	0.306405	0.00498695	0.0151335	unchanged	NA
	1918	ENSG00000197093	0.859926	0.287337	0.00276484	0.00891891	unchanged	GAL3ST4
	1919	ENSG00000175229	0.859894	0.288331	0.00286074	0.00918901	unchanged	GAL3ST3
	1920	ENSG00000231969	0.859835	0.298639	0.00398713	0.0123624	unchanged	MMADHC-DT
	1921	ENSG00000167333	0.859003	0.137179	3.80304e-10	2.92793e-09	unchanged	TRIM68
	1922	ENSG00000231216	0.858952	0.241323	0.000371785	0.00142531	unchanged	GS1-600G8.3
	1923	ENSG00000116678	0.858154	0.145538	3.71497e-09	2.62437e-08	unchanged	LEPR
	1924	ENSG00000027869	0.857256	0.197335	1.39805e-05	6.67862e-05	unchanged	SH2D2A
	1925	ENSG00000182489	0.857193	0.311085	0.0058603	0.0174467	unchanged	XKRX
	1926	ENSG00000100276	0.856237	0.311191	0.00593255	0.0176416	unchanged	RASL10A
	1927	ENSG00000134955	0.854958	0.303069	0.00478737	0.0145941	unchanged	SLC37A2
	1928	ENSG00000260302	0.854952	0.272654	0.00171461	0.00577387	unchanged	NA
	1929	ENSG00000115267	0.854908	0.264922	0.00125089	0.00431924	unchanged	IFIH1
	1930	ENSG00000115325	0.854772	0.115044	1.08658e-13	1.09251e-12	unchanged	DOK1
	1931	ENSG00000116329	0.85449	0.278913	0.00218657	0.00719842	unchanged	OPRD1
	1932	ENSG00000271776	0.854471	0.288376	0.00304609	0.00972429	unchanged	LOC780529
	1933	ENSG00000146350	0.854352	0.131883	9.28836e-11	7.51452e-10	unchanged	TBC1D32
	1934	ENSG00000139880	0.854113	0.0993637	8.26688e-18	1.04495e-16	unchanged	CDH24
	1935	ENSG00000111752	0.854025	0.190153	7.0809e-06	3.52418e-05	unchanged	PHC1
	1936	ENSG00000233901	0.853676	0.288194	0.00305496	0.00975127	unchanged	LINC01503
	1937	ENSG00000173338	0.852902	0.303441	0.00494236	0.0150158	unchanged	KCNK7
	1938	ENSG00000196126	0.85289	0.29298	0.00360171	0.0112855	unchanged	HLA-DRB1
	1939	ENSG00000138641	0.852782	0.10244	8.45225e-17	1.01711e-15	unchanged	HERC3
	1940	ENSG00000230082	0.852371	0.308434	0.00571775	0.0170853	unchanged	PRRT3-AS1
	1941	ENSG00000184908	0.852311	0.308424	0.00571964	0.0170888	unchanged	CLCNKB
	1942	ENSG00000225721	0.85214	0.3112	0.00617685	0.0182959	unchanged	NA
	1943	ENSG00000230269	0.851997	0.289188	0.00321736	0.0102097	unchanged	LINC02525
	1944	ENSG00000163082	0.851268	0.286558	0.00297154	0.00951616	unchanged	SGPP2
	1945	ENSG00000131378	0.850898	0.298273	0.00433431	0.0133469	unchanged	RFTN1
	1946	ENSG00000258789	0.850839	0.300095	0.00457925	0.0140237	unchanged	NA
	1947	ENSG00000185477	0.849847	0.17575	1.32776e-06	7.20109e-06	unchanged	GPRIN3
	1948	ENSG00000261168	0.849813	0.310269	0.00616353	0.0182588	unchanged	NA
	1949	ENSG00000074317	0.849688	0.202312	2.6704e-05	0.000122653	unchanged	SNCB
	1950	ENSG00000139767	0.849318	0.281403	0.00254317	0.00826539	unchanged	SRRM4
	1951	ENSG00000269514	0.84925	0.301224	0.00481238	0.0146628	unchanged	NA
	1952	ENSG00000100302	0.849091	0.306166	0.00554898	0.0166448	unchanged	RASD2
	1953	ENSG00000122986	0.849023	0.249956	0.000682049	0.00248798	unchanged	HVCN1
	1954	ENSG00000149179	0.84777	0.104967	6.66374e-16	7.61287e-15	unchanged	CSTPP1
	1955	ENSG00000232043	0.847472	0.287687	0.00322113	0.0102176	unchanged	NA
	1956	ENSG00000237424	0.846926	0.128985	5.16601e-11	4.25895e-10	unchanged	FOXD2-AS1
	1957	ENSG00000172915	0.846834	0.0982572	6.78099e-18	8.60851e-17	unchanged	NBEA
	1958	ENSG00000118369	0.846745	0.156048	5.75751e-08	3.63782e-07	unchanged	USP35
	1959	ENSG00000107104	0.84611	0.06653	4.71417e-37	1.27512e-35	unchanged	KANK1
	1960	ENSG00000110844	0.84581	0.119025	1.1931e-12	1.10906e-11	unchanged	PRPF40B
	1961	ENSG00000151640	0.845467	0.095945	1.2293e-18	1.61857e-17	unchanged	DPYSL4
	1962	ENSG00000233056	0.844996	0.285314	0.00306007	0.00976225	unchanged	ERVH48-1
	1963	ENSG00000093144	0.844955	0.287333	0.00327489	0.0103669	unchanged	ECHDC1
	1964	ENSG00000214595	0.844748	0.132117	1.61687e-10	1.2828e-09	unchanged	EML6
	1965	ENSG00000132623	0.844439	0.13539	4.45829e-10	3.40773e-09	unchanged	ANKEF1
	1966	ENSG00000085741	0.844262	0.185557	5.36743e-06	2.71528e-05	unchanged	WNT11
	1967	ENSG00000184507	0.844211	0.309717	0.00641562	0.0189265	unchanged	NUTM1
	1968	ENSG00000203727	0.844137	0.140797	2.02943e-09	1.46597e-08	unchanged	SAMD5
	1969	ENSG00000165164	0.843988	0.311294	0.00670358	0.0196694	unchanged	CFAP47
	1970	ENSG00000204381	0.843303	0.119518	1.71511e-12	1.57924e-11	unchanged	LAYN
	1971	ENSG00000261211	0.843279	0.307782	0.0061466	0.018211	unchanged	NA
	1972	ENSG00000249509	0.843047	0.268621	0.00169859	0.00572436	unchanged	NA
	1973	ENSG00000111817	0.842916	0.135333	4.71045e-10	3.59226e-09	unchanged	DSE
	1974	ENSG00000095321	0.842345	0.131367	1.43485e-10	1.14227e-09	unchanged	CRAT
	1975	ENSG00000205808	0.841846	0.124047	1.14863e-11	9.94628e-11	unchanged	PLPP6
	1976	ENSG00000267296	0.84171	0.226154	0.000197766	0.000791908	unchanged	CEBPA-DT
	1977	ENSG00000279069	0.841664	0.311	0.00680345	0.0199349	unchanged	NA
	1978	ENSG00000105472	0.8416	0.195583	1.68479e-05	7.97472e-05	unchanged	CLEC11A
	1979	ENSG00000170925	0.841481	0.275417	0.00224833	0.00738407	unchanged	TEX13B
	1980	ENSG00000159403	0.84098	0.0934791	2.33147e-19	3.17887e-18	unchanged	C1R
	1981	ENSG00000164303	0.8407	0.261956	0.00133048	0.00456575	unchanged	ENPP6
	1982	ENSG00000114656	0.840591	0.310996	0.00687372	0.0201206	unchanged	CFAP92
	1983	ENSG00000145012	0.840564	0.0633763	3.79057e-40	1.10999e-38	unchanged	LPP
	1984	ENSG00000250669	0.839803	0.307833	0.00636984	0.0188152	unchanged	LOC359819
	1985	ENSG00000186868	0.839422	0.123619	1.1183e-11	9.70504e-11	unchanged	MAPT
	1986	ENSG00000180739	0.839064	0.2019	3.24087e-05	0.000147065	unchanged	S1PR5
	1987	ENSG00000169116	0.838863	0.0843454	2.63663e-23	4.35609e-22	unchanged	PARM1
	1988	ENSG00000172995	0.838851	0.308721	0.00658412	0.0193591	unchanged	ARPP21
	1989	ENSG00000140450	0.838778	0.140223	2.20754e-09	1.58923e-08	unchanged	ARRDC4
	1990	ENSG00000232023	0.83733	0.266409	0.00167215	0.00564223	unchanged	LINC01807
	1991	ENSG00000179477	0.837326	0.262759	0.00143918	0.00491499	unchanged	ALOX12B
	1992	ENSG00000169252	0.837224	0.310524	0.00701426	0.0204859	unchanged	ADRB2
	1993	ENSG00000262136	0.837008	0.310153	0.00696111	0.0203459	unchanged	NA
	1994	ENSG00000128652	0.836964	0.277993	0.00260613	0.00845476	unchanged	HOXD3
	1995	ENSG00000176692	0.836319	0.310954	0.00715544	0.0208514	unchanged	FOXC2
	1996	ENSG00000232021	0.836202	0.310191	0.00702274	0.0205056	unchanged	LEF1-AS1
	1997	ENSG00000136828	0.836136	0.177384	2.43243e-06	1.27908e-05	unchanged	RALGPS1
	1998	ENSG00000171817	0.835703	0.227821	0.000244225	0.000964572	unchanged	ZNF540
	1999	ENSG00000105664	0.835678	0.239191	0.000476257	0.0017886	unchanged	COMP
[truncated: 6,970 more rows]

## Sheet: 1S1B
Category	Term	Count	%	PValue	Genes	List Total	Pop Hits	Pop Total	Fold Enrichment	Bonferroni	Benjamini	FDR
GOTERM_BP_DIRECT	GO:0006357~regulation of transcription from RNA polymerase II promoter	74	13.074204946996467	7.85336e-08	9421, 345462, 402381, 9422, 90485, 91975, 146540, 51085, 81931, 400713, 115560, 147741, 3237, 4808, 2302, 3236, 3235, 283248, 5579, 139135, 2626, 5076, 7772, 8187, 5077, 93349, 9753, 343472, 170958, 7691, 374899, 3171, 2313, 401, 84436, 148206, 5309, 129025, 162967, 54807, 7584, 4990, 163059, 1482, 339488, 56033, 92285, 9242, 91392, 140690, 3219, 3218, 3217, 148979, 80264, 3215, 57167, 342926, 54…	465	1599	19256	1.916445090009213	1.6891153017462024E-4	1.6892579072724095E-4	1.685331226874287E-4
GOTERM_BP_DIRECT	GO:0000122~negative regulation of transcription from RNA polymerase II promoter	48	8.480565371024735	1.27913e-05	9421, 4692, 4110, 4111, 4112, 4113, 1482, 9242, 146540, 158809, 255877, 51085, 84944, 3218, 54551, 11107, 81931, 148979, 57167, 147741, 2302, 3235, 4103, 5138, 7216, 4105, 4107, 7639, 7539, 4109, 2626, 8187, 4100, 6662, 4102, 728269, 23316, 165, 2810, 6656, 9947, 6658, 64180, 6756, 140801, 51438, 138474, 30832	465	1011	19256	1.9660891483998597	0.0271392190985853	0.013757056691135227	0.013725078409658854
GOTERM_BP_DIRECT	GO:0030154~cell differentiation	35	6.18374558303887	3.33452e-05	402381, 11061, 23705, 66037, 1482, 57540, 65009, 122402, 148979, 5919, 387597, 117, 89876, 10791, 54558, 91646, 54937, 10553, 2626, 6423, 6422, 1890, 23532, 3171, 4916, 2313, 6656, 646, 6997, 6658, 8536, 140801, 10125, 6857, 55859	465	665	19256	2.179513299377476	0.06921477121534103	0.023908507059589065	0.023852931729371515
GOTERM_BP_DIRECT	GO:0009952~anterior/posterior pattern specification	11	1.9434628975265018	8.88357e-05	3219, 3218, 3217, 2018, 3227, 3215, 3236, 3235, 6997, 56033, 23237	465	94	19256	4.845939144360559	0.1739451435502518	0.04777140184605084	0.04766035721135523
GOTERM_BP_DIRECT	GO:0006355~regulation of transcription, DNA-templated	43	7.597173144876325	0.000188307	345462, 9422, 7761, 129025, 162967, 54807, 7584, 91975, 26974, 163059, 1482, 1382, 92285, 9242, 146540, 91392, 51085, 81931, 400713, 3217, 80264, 55205, 2202, 342926, 26013, 7639, 7539, 2626, 10214, 5076, 7772, 170958, 353355, 63934, 100506243, 7691, 165, 10307, 84436, 148206, 6656, 55713, 5309	465	972	19256	1.8319571662462941	0.3330805507423664	0.08100957293479544	0.08082126616367784
GOTERM_BP_DIRECT	GO:0007283~spermatogenesis	26	4.593639575971731	0.000251701	402381, 23705, 7584, 66037, 221400, 84944, 122402, 2302, 117, 11144, 84221, 89876, 54558, 91646, 54937, 5010, 6662, 4882, 3171, 3306, 10942, 646, 54967, 6756, 140801, 157695	465	477	19256	2.2571898739884135	0.41811205255795514	0.09023487197489821	0.09002512099401747
GOTERM_BP_DIRECT	GO:0048704~embryonic skeletal system morphogenesis	7	1.2367491166077738	0.000476384	3219, 3218, 3217, 80199, 3215, 3236, 3235	465	42	19256	6.901792114695342	0.6411842562227229	0.14638601676572274	0.14604574243572338
GOTERM_BP_DIRECT	GO:0019933~cAMP-mediated signaling	7	1.2367491166077738	0.000784365	57211, 6662, 117, 5138, 2044, 51083, 7052	465	46	19256	6.301636278634876	0.8150798396845691	0.21089613606690086	0.21040590794959055
GOTERM_BP_DIRECT	GO:0050679~positive regulation of epithelial cell proliferation	8	1.4134275618374559	0.00134172	5076, 6662, 6422, 5314, 1482, 2064, 114821, 1956	465	69	19256	4.801246688483715	0.9443110362237858	0.32067060357045907	0.31992520467791963
GOTERM_BP_DIRECT	GO:0034587~piRNA metabolic process	5	0.88339222614841	0.00204827	84944, 122402, 150763, 221400, 91646	465	23	19256	9.002337540906966	0.9878491535922306	0.44058380949444953	0.43955967232686594
GOTERM_BP_DIRECT	GO:0048856~anatomical structure development	7	1.2367491166077738	0.00243323	5076, 5077, 3227, 3237, 6423, 6422, 339488	465	57	19256	5.085531031880778	0.9947011490626656	0.4758079364158069	0.4747019207570068
GOTERM_BP_DIRECT	GO:0007141~male meiosis I	5	0.88339222614841	0.00376277	122402, 3306, 7314, 11144, 140801	465	27	19256	7.668657905217046	0.9996991729565796	0.6254206245412562	0.623966834154131
GOTERM_BP_DIRECT	GO:0071364~cellular response to epidermal growth factor stimulus	6	1.0600706713780919	0.00398291	5076, 6662, 1277, 6997, 2064, 1956	465	44	19256	5.646920821114369	0.9998129901908372	0.6254206245412562	0.623966834154131
GOTERM_BP_DIRECT	GO:0007140~male meiosis	5	0.88339222614841	0.00430754	84944, 122402, 3306, 91646, 138474	465	28	19256	7.394777265745009	0.9999072437581414	0.6254206245412562	0.623966834154131
GOTERM_BP_DIRECT	GO:0008584~male gonad development	9	1.5901060070671376	0.00436137	56159, 23639, 4808, 6662, 6423, 666, 64478, 6422, 2626	465	107	19256	3.483147422369611	0.9999174269111865	0.6254206245412562	0.623966834154131
GOTERM_BP_DIRECT	GO:0007165~signal transduction	46	8.12720848056537	0.00473217	7044, 23526, 51816, 6452, 5662, 8612, 4058, 7060, 1382, 65009, 1381, 57569, 10636, 8809, 29984, 5797, 5138, 5579, 8800, 1956, 9411, 9235, 5891, 6662, 6387, 4486, 1890, 2064, 1271, 84707, 51293, 2810, 2676, 5909, 2256, 51676, 55879, 4599, 8536, 9901, 10125, 56944, 9706, 2978, 55859, 84152	465	1251	19256	1.5226975408920174	0.9999629428507855	0.6361805573287974	0.6347017554754065
GOTERM_BP_DIRECT	GO:0048546~digestive tract morphogenesis	4	0.7067137809187279	0.00509692	4882, 6423, 6422, 1956	465	15	19256	11.042867383512544	0.9999831557925885	0.6449099109864296	0.6434108177484323
GOTERM_BP_DIRECT	GO:0015671~oxygen transport	4	0.7067137809187279	0.0061621	3039, 3046, 114757, 3040	465	16	19256	10.352688172043012	0.9999983182817028	0.7363715309932882	0.7346598351983248
GOTERM_BP_DIRECT	GO:0009410~response to xenobiotic stimulus	14	2.4734982332155475	0.00787381	6423, 6422, 51083, 2018, 1277, 117, 5797, 8989, 999, 4313, 5579, 6538, 2626, 389903	465	250	19256	2.3190021505376346	0.999999958749255	0.7969282991448552	0.795075839128247
GOTERM_BP_DIRECT	GO:0033603~positive regulation of dopamine secretion	3	0.5300353356890459	0.00814989	6387, 4986, 6857	465	6	19256	20.70537634408602	0.9999999773301602	0.7969282991448552	0.795075839128247
GOTERM_BP_DIRECT	GO:0007519~skeletal muscle tissue development	6	1.0600706713780919	0.00815082	245806, 3236, 3235, 10791, 9242, 3292	465	52	19256	4.778163771712159	0.9999999773762382	0.7969282991448552	0.795075839128247
GOTERM_BP_DIRECT	GO:0009566~fertilization	6	1.0600706713780919	0.00815082	84944, 122402, 56159, 91646, 246777, 84690	465	52	19256	4.778163771712159	0.9999999773762382	0.7969282991448552	0.795075839128247
GOTERM_BP_DIRECT	GO:0045944~positive regulation of transcription from RNA polymerase II promoter	44	7.773851590106007	0.0092231	9421, 4692, 91975, 116986, 1482, 339488, 92285, 51083, 51085, 140690, 3219, 11107, 3217, 148979, 4808, 3215, 57167, 2302, 3236, 3235, 112770, 10553, 2902, 1956, 2626, 5076, 7772, 5077, 245806, 6662, 6423, 343472, 3196, 3171, 3227, 2313, 401, 6656, 3664, 6658, 8536, 138474, 55859, 5309	465	1230	19256	1.481360258763878	0.9999999977915021	0.8625608107598248	0.8605557879547113
GOTERM_BP_DIRECT	GO:0043406~positive regulation of MAP kinase activity	6	1.0600706713780919	0.0110815	4916, 4486, 6997, 2064, 10125, 1956	465	56	19256	4.436866359447005	0.9999999999610761	0.9931816280431031	0.9908729771178518
GOTERM_BP_DIRECT	GO:0007507~heart development	12	2.1201413427561837	0.0132029	9421, 4916, 27295, 2302, 6662, 5950, 6997, 4313, 64180, 1482, 2064, 2626	465	210	19256	2.3663287250384024	0.9999999999996162	1.0	0.998139534883721
GOTERM_BP_DIRECT	GO:0060346~bone trabecula formation	3	0.5300353356890459	0.0147346	1277, 6422, 4313	465	8	19256	15.529032258064516	0.9999999999999865	1.0	0.998139534883721
GOTERM_BP_DIRECT	GO:0030879~mammary gland development	4	0.7067137809187279	0.0152314	3219, 6662, 3235, 6997	465	22	19256	7.529227761485825	0.9999999999999954	1.0	0.998139534883721
GOTERM_BP_DIRECT	GO:0007626~locomotory behavior	7	1.2367491166077738	0.0176539	6571, 3358, 89797, 4887, 4986, 84152, 5309	465	86	19256	3.3706426606651663	1.0	1.0	0.998139534883721
GOTERM_BP_DIRECT	GO:0007169~transmembrane receptor protein tyrosine kinase signaling pathway	8	1.4134275618374559	0.017947	4916, 9788, 4486, 220164, 4058, 2064, 10278, 1956	465	111	19256	2.984558752300688	1.0	1.0	0.998139534883721
GOTERM_BP_DIRECT	GO:0007420~brain development	11	1.9434628975265018	0.0221303	57512, 51481, 51480, 2018, 2302, 6656, 6658, 23114, 1282, 10058, 2902	465	198	19256	2.300597371565113	1.0	1.0	0.998139534883721
GOTERM_BP_DIRECT	GO:0035725~sodium ion transmembrane transport	8	1.4134275618374559	0.022276	6553, 55117, 6326, 6528, 284111, 6329, 6538, 64849	465	116	19256	2.8559139784946237	1.0	1.0	0.998139534883721
GOTERM_BP_DIRECT	GO:0007268~chemical synaptic transmission	12	2.1201413427561837	0.0228318	6571, 774, 3358, 4882, 8913, 55879, 9900, 3798, 4986, 6857, 4889, 2902	465	228	19256	2.179513299377476	1.0	1.0	0.998139534883721
GOTERM_BP_DIRECT	GO:0003214~cardiac left ventricle morphogenesis	3	0.5300353356890459	0.0229388	6423, 4887, 4889	465	10	19256	12.423225806451613	1.0	1.0	0.998139534883721
GOTERM_BP_DIRECT	GO:0038063~collagen-activated tyrosine kinase receptor signaling pathway	3	0.5300353356890459	0.0229388	1277, 1284, 1282	465	10	19256	12.423225806451613	1.0	1.0	0.998139534883721
GOTERM_BP_DIRECT	GO:0009954~proximal/distal pattern formation	4	0.7067137809187279	0.0239614	3219, 3227, 3236, 3235	465	26	19256	6.370885028949545	1.0	1.0	0.998139534883721
GOTERM_BP_DIRECT	GO:0035902~response to immobilization stress	4	0.7067137809187279	0.0239614	7368, 745, 51083, 5309	465	26	19256	6.370885028949545	1.0	1.0	0.998139534883721
GOTERM_BP_DIRECT	GO:0090103~cochlea morphogenesis	4	0.7067137809187279	0.0239614	5076, 115908, 6662, 53904	465	26	19256	6.370885028949545	1.0	1.0	0.998139534883721
GOTERM_BP_DIRECT	GO:0051056~regulation of small GTPase mediated signal transduction	8	1.4134275618374559	0.0241939	23526, 55200, 9411, 57569, 50619, 29984, 5909, 9901	465	118	19256	2.8075086568252234	1.0	1.0	0.998139534883721
GOTERM_BP_DIRECT	GO:0007422~peripheral nervous system development	4	0.7067137809187279	0.0264862	2676, 4808, 7368, 23114	465	27	19256	6.1349263241736365	1.0	1.0	0.998139534883721
GOTERM_BP_DIRECT	GO:0008542~visual learning	5	0.88339222614841	0.0320806	10636, 5896, 65009, 2902, 84152	465	50	19256	4.141075268817205	1.0	1.0	0.998139534883721
GOTERM_BP_DIRECT	GO:0051321~meiotic cell cycle	6	1.0600706713780919	0.0346843	84944, 85417, 6795, 66037, 11144, 91646	465	75	19256	3.312860215053764	1.0	1.0	0.998139534883721
GOTERM_BP_DIRECT	GO:0007129~synapsis	4	0.7067137809187279	0.0348777	84944, 10734, 11144, 84690	465	30	19256	5.521433691756272	1.0	1.0	0.998139534883721
GOTERM_BP_DIRECT	GO:0090630~activation of GTPase activity	7	1.2367491166077738	0.0353874	23526, 9411, 4916, 2302, 10297, 116986, 10125	465	101	19256	2.8700521665069734	1.0	1.0	0.998139534883721
GOTERM_BP_DIRECT	GO:0048771~tissue remodeling	3	0.5300353356890459	0.0379165	1464, 4313, 7060	465	13	19256	9.556327543424318	1.0	1.0	0.998139534883721
GOTERM_BP_DIRECT	GO:0070372~regulation of ERK1 and ERK2 cascade	4	0.7067137809187279	0.0379444	5314, 2064, 10125, 1956	465	31	19256	5.34332292750607	1.0	1.0	0.998139534883721
GOTERM_BP_DIRECT	GO:0043066~negative regulation of apoptotic process	20	3.53356890459364	0.0385246	5076, 6662, 4255, 6422, 4058, 1482, 23532, 2064, 7052, 84944, 56159, 84236, 4103, 6997, 5314, 140801, 10202, 10553, 4889, 1956	465	506	19256	1.6367886438012667	1.0	1.0	0.998139534883721
GOTERM_BP_DIRECT	GO:0007275~multicellular organism development	6	1.0600706713780919	0.04195	4916, 4486, 4058, 999, 2064, 1956	465	79	19256	3.145120457329522	1.0	1.0	0.998139534883721
GOTERM_BP_DIRECT	GO:0033674~positive regulation of kinase activity	5	0.88339222614841	0.0433112	4916, 4486, 4058, 2064, 1956	465	55	19256	3.764613880742913	1.0	1.0	0.998139534883721
GOTERM_BP_DIRECT	GO:0030178~negative regulation of Wnt signaling pathway	5	0.88339222614841	0.0433112	388630, 6423, 6422, 10297, 56033	465	55	19256	3.764613880742913	1.0	1.0	0.998139534883721
GOTERM_BP_DIRECT	GO:0015670~carbon dioxide transport	3	0.5300353356890459	0.0435441	3039, 3046, 3040	465	14	19256	8.87373271889401	1.0	1.0	0.998139534883721
GOTERM_BP_DIRECT	GO:0045600~positive regulation of fat cell differentiation	5	0.88339222614841	0.0457904	3358, 5919, 4023, 6423, 6422	465	56	19256	3.6973886328725043	1.0	1.0	0.998139534883721
GOTERM_BP_DIRECT	GO:1904956~regulation of midbrain dopaminergic neuron differentiation	2	0.35335689045936397	0.0476134	6423, 6422	465	2	19256	41.410752688172046	1.0	1.0	0.998139534883721
GOTERM_BP_DIRECT	GO:1990792~cellular response to glial cell derived neurotrophic factor	2	0.35335689045936397	0.0476134	5909, 5309	465	2	19256	41.410752688172046	1.0	1.0	0.998139534883721
GOTERM_BP_DIRECT	GO:2000041~negative regulation of planar cell polarity pathway involved in axis elongation	2	0.35335689045936397	0.0476134	6423, 6422	465	2	19256	41.410752688172046	1.0	1.0	0.998139534883721
GOTERM_BP_DIRECT	GO:0021888~hypothalamus gonadotrophin-releasing hormone neuron development	2	0.35335689045936397	0.0476134	4808, 7314	465	2	19256	41.410752688172046	1.0	1.0	0.998139534883721
GOTERM_BP_DIRECT	GO:0071276~cellular response to cadmium ion	4	0.7067137809187279	0.0479362	4495, 4496, 4489, 1956	465	34	19256	4.871853257432005	1.0	1.0	0.998139534883721
GOTERM_BP_DIRECT	GO:0022900~electron transport chain	5	0.88339222614841	0.0483472	2731, 3620, 217, 10202, 1528	465	57	19256	3.632522165629127	1.0	1.0	0.998139534883721
GOTERM_BP_DIRECT	GO:0006874~cellular calcium ion homeostasis	7	1.2367491166077738	0.0501331	3358, 6387, 489, 8989, 5314, 5579, 9900	465	110	19256	2.635229716520039	1.0	1.0	0.998139534883721
GOTERM_BP_DIRECT	GO:0003180~aortic valve morphogenesis	4	0.7067137809187279	0.0552406	6662, 1482, 4846, 2626	465	36	19256	4.601194743130227	1.0	1.0	0.998139534883721
GOTERM_BP_DIRECT	GO:0048709~oligodendrocyte differentiation	4	0.7067137809187279	0.0552406	6662, 666, 745, 2064	465	36	19256	4.601194743130227	1.0	1.0	0.998139534883721
GOTERM_BP_DIRECT	GO:0060347~heart trabecula formation	3	0.5300353356890459	0.0556443	57211, 5950, 1482	465	16	19256	7.764516129032258	1.0	1.0	0.998139534883721
GOTERM_BP_DIRECT	GO:0010273~detoxification of copper ion	3	0.5300353356890459	0.0556443	4495, 4496, 4489	465	16	19256	7.764516129032258	1.0	1.0	0.998139534883721
GOTERM_BP_DIRECT	GO:0007218~neuropeptide signaling pathway	7	1.2367491166077738	0.0557729	27344, 9427, 4887, 4986, 4889, 10886, 51083	465	113	19256	2.565267865638976	1.0	1.0	0.998139534883721
GOTERM_BP_DIRECT	GO:0009653~anatomical structure morphogenesis	8	1.4134275618374559	0.0581859	51085, 3215, 6656, 6658, 1903, 2626, 3171, 5309	465	143	19256	2.316685465072562	1.0	1.0	0.998139534883721
GOTERM_BP_DIRECT	GO:0071514~genetic imprinting	3	0.5300353356890459	0.0620835	140690, 84944, 4692	465	17	19256	7.307779886148008	1.0	1.0	0.998139534883721
GOTERM_BP_DIRECT	GO:0098703~calcium ion import across plasma membrane	4	0.7067137809187279	0.0630417	774, 6326, 8913, 6329	465	38	19256	4.359026598754952	1.0	1.0	0.998139534883721
GOTERM_BP_DIRECT	GO:0042552~myelination	5	0.88339222614841	0.0653015	57211, 6326, 2064, 2581, 23114	465	63	19256	3.286567673664448	1.0	1.0	0.998139534883721
GOTERM_BP_DIRECT	GO:0042542~response to hydrogen peroxide	4	0.7067137809187279	0.067123	3039, 1277, 4313, 3040	465	39	19256	4.247256685966363	1.0	1.0	0.998139534883721
GOTERM_BP_DIRECT	GO:0045926~negative regulation of growth	3	0.5300353356890459	0.0687608	4495, 4496, 4489	465	18	19256	6.901792114695341	1.0	1.0	0.998139534883721
GOTERM_BP_DIRECT	GO:1904026~regulation of collagen fibril organization	2	0.35335689045936397	0.0705648	165, 30008	465	3	19256	27.607168458781363	1.0	1.0	0.998139534883721
GOTERM_BP_DIRECT	GO:0015746~citrate transport	2	0.35335689045936397	0.0705648	284111, 64849	465	3	19256	27.607168458781363	1.0	1.0	0.998139534883721
GOTERM_BP_DIRECT	GO:0046103~inosine biosynthetic process	2	0.35335689045936397	0.0705648	51816, 161823	465	3	19256	27.607168458781363	1.0	1.0	0.998139534883721
GOTERM_BP_DIRECT	GO:0031644~regulation of neurological system process	2	0.35335689045936397	0.0705648	3358, 4846	465	3	19256	27.607168458781363	1.0	1.0	0.998139534883721
GOTERM_BP_DIRECT	GO:0090090~negative regulation of canonical Wnt signaling pathway	8	1.4134275618374559	0.071272	80199, 115908, 6662, 6423, 6422, 10297, 1482, 92162	465	150	19256	2.208573476702509	1.0	1.0	0.998139534883721
GOTERM_BP_DIRECT	GO:0019233~sensory perception of pain	4	0.7067137809187279	0.0756354	3218, 4692, 8989, 4986	465	41	19256	4.040073432992394	1.0	1.0	0.998139534883721
GOTERM_BP_DIRECT	GO:0090190~positive regulation of branching involved in ureteric bud morphogenesis	3	0.5300353356890459	0.0756612	3217, 5076, 6662	465	19	19256	6.538539898132428	1.0	1.0	0.998139534883721
GOTERM_BP_DIRECT	GO:0035050~embryonic heart tube development	3	0.5300353356890459	0.0756612	9421, 1482, 65009	465	19	19256	6.538539898132428	1.0	1.0	0.998139534883721
GOTERM_BP_DIRECT	GO:1904036~negative regulation of epithelial cell apoptotic process	3	0.5300353356890459	0.0756612	116986, 5314, 1482	465	19	19256	6.538539898132428	1.0	1.0	0.998139534883721
GOTERM_BP_DIRECT	GO:0007155~cell adhesion	20	3.53356890459364	0.0764529	9235, 5010, 9788, 6387, 4684, 10085, 23166, 7060, 3385, 23114, 9071, 9074, 56100, 56101, 1289, 56113, 1277, 55742, 5797, 10278	465	551	19256	1.5031126202603284	1.0	1.0	0.998139534883721
GOTERM_BP_DIRECT	GO:0006814~sodium ion transport	5	0.88339222614841	0.0814915	159963, 55117, 6326, 6528, 6329	465	68	19256	3.0449082858950036	1.0	1.0	0.998139534883721
GOTERM_BP_DIRECT	GO:0036342~post-anal tail morphogenesis	3	0.5300353356890459	0.0827699	8642, 4882, 6423	465	20	19256	6.211612903225807	1.0	1.0	0.998139534883721
GOTERM_BP_DIRECT	GO:0008585~female gonad development	3	0.5300353356890459	0.0827699	7314, 64478, 6422	465	20	19256	6.211612903225807	1.0	1.0	0.998139534883721
GOTERM_BP_DIRECT	GO:0071560~cellular response to transforming growth factor beta stimulus	5	0.88339222614841	0.0849465	6662, 1277, 6422, 5138, 1284	465	69	19256	3.000779180302322	1.0	1.0	0.998139534883721
GOTERM_BP_DIRECT	GO:0030198~extracellular matrix organization	8	1.4134275618374559	0.0859714	133584, 1277, 1298, 2199, 1296, 4313, 1284, 1282	465	157	19256	2.110102047804945	1.0	1.0	0.998139534883721
GOTERM_BP_DIRECT	GO:0071300~cellular response to retinoic acid	5	0.88339222614841	0.088472	5076, 7584, 6662, 1277, 4058	465	70	19256	2.9579109062980034	1.0	1.0	0.998139534883721
GOTERM_BP_DIRECT	GO:0001658~branching involved in ureteric bud morphogenesis	4	0.7067137809187279	0.0892405	5076, 3237, 6662, 8642	465	44	19256	3.7646138807429126	1.0	1.0	0.998139534883721
GOTERM_BP_DIRECT	GO:0030517~negative regulation of axon extension	3	0.5300353356890459	0.0900731	56920, 80128, 999	465	21	19256	5.915821812596007	1.0	1.0	0.998139534883721
GOTERM_BP_DIRECT	GO:0016338~calcium-independent cell-cell adhesion via plasma membrane cell-adhesion molecules	3	0.5300353356890459	0.0900731	5010, 9071, 9074	465	21	19256	5.915821812596007	1.0	1.0	0.998139534883721
GOTERM_BP_DIRECT	GO:0003351~epithelial cilium movement	3	0.5300353356890459	0.0900731	9576, 23639, 26256	465	21	19256	5.915821812596007	1.0	1.0	0.998139534883721
GOTERM_BP_DIRECT	GO:0009994~oocyte differentiation	2	0.35335689045936397	0.0929643	402381, 54937	465	4	19256	20.705376344086023	1.0	1.0	0.998139534883721
GOTERM_BP_DIRECT	GO:1990708~conditioned place preference	2	0.35335689045936397	0.0929643	64478, 4986	465	4	19256	20.705376344086023	1.0	1.0	0.998139534883721
GOTERM_BP_DIRECT	GO:0034334~adherens junction maintenance	2	0.35335689045936397	0.0929643	9788, 55765	465	4	19256	20.705376344086023	1.0	1.0	0.998139534883721
GOTERM_BP_DIRECT	GO:0061333~renal tubule morphogenesis	2	0.35335689045936397	0.0929643	9788, 1282	465	4	19256	20.705376344086023	1.0	1.0	0.998139534883721
GOTERM_BP_DIRECT	GO:0072289~metanephric nephron tubule formation	2	0.35335689045936397	0.0929643	5076, 6662	465	4	19256	20.705376344086023	1.0	1.0	0.998139534883721
GOTERM_BP_DIRECT	GO:0048050~post-embryonic eye morphogenesis	2	0.35335689045936397	0.0929643	2202, 4237	465	4	19256	20.705376344086023	1.0	1.0	0.998139534883721
GOTERM_BP_DIRECT	GO:0006546~glycine catabolic process	2	0.35335689045936397	0.0929643	275, 2731	465	4	19256	20.705376344086023	1.0	1.0	0.998139534883721
GOTERM_BP_DIRECT	GO:0090244~Wnt signaling pathway involved in somitogenesis	2	0.35335689045936397	0.0929643	6423, 6422	465	4	19256	20.705376344086023	1.0	1.0	0.998139534883721
GOTERM_BP_DIRECT	GO:0006154~adenosine catabolic process	2	0.35335689045936397	0.0929643	51816, 161823	465	4	19256	20.705376344086023	1.0	1.0	0.998139534883721
GOTERM_BP_DIRECT	GO:0001947~heart looping	5	0.88339222614841	0.0957307	9421, 51676, 1482, 65009, 2626	465	72	19256	2.875746714456392	1.0	1.0	0.998139534883721
GOTERM_BP_DIRECT	GO:0098609~cell-cell adhesion	9	1.5901060070671376	0.095898	6662, 1296, 5314, 999, 29091, 3385, 23114, 7070, 1956	465	193	19256	1.931071368878489	1.0	1.0	0.998139534883721
GOTERM_BP_DIRECT	GO:1903779~regulation of cardiac conduction	3	0.5300353356890459	0.0975573	489, 30845, 1482	465	22	19256	5.646920821114369	1.0	1.0	0.998139534883721
GOTERM_BP_DIRECT	GO:0006836~neurotransmitter transport	4	0.7067137809187279	0.0988369	6571, 55117, 55879, 9900	465	46	19256	3.600935016362786	1.0	1.0	0.998139534883721

## Sheet: 1S1C
Category	Term	Count	%	PValue	Genes	List Total	Pop Hits	Pop Total	Fold Enrichment	Bonferroni	Benjamini	FDR
INTERPRO	IPR041898:MAGE_WH1	17	3.0035335689045937	1.99119e-16	4692, 4110, 4100, 4111, 4112, 4102, 4113, 728269, 158809, 54551, 4103, 7216, 9947, 4105, 4107, 51438, 4109	510	38	20603	18.07280701754386	2.8821389719269064E-13	1.0693639443724138E-13	1.061949248302035E-13
INTERPRO	IPR002190:MHD_dom	17	3.0035335689045937	3.29542e-16	4692, 4110, 4100, 4111, 4112, 4102, 4113, 728269, 158809, 54551, 4103, 7216, 9947, 4105, 4107, 51438, 4109	510	39	20603	17.60940170940171	4.3232084578903596E-13	1.0693639443724138E-13	1.061949248302035E-13
INTERPRO	IPR037445:MAGE	17	3.0035335689045937	3.29542e-16	4692, 4110, 4100, 4111, 4112, 4102, 4113, 728269, 158809, 54551, 4103, 7216, 9947, 4105, 4107, 51438, 4109	510	39	20603	17.60940170940171	4.3232084578903596E-13	1.0693639443724138E-13	1.061949248302035E-13
INTERPRO	IPR041899:MAGE_WH2	17	3.0035335689045937	3.29542e-16	4692, 4110, 4100, 4111, 4112, 4102, 4113, 728269, 158809, 54551, 4103, 7216, 9947, 4105, 4107, 51438, 4109	510	39	20603	17.60940170940171	4.3232084578903596E-13	1.0693639443724138E-13	1.061949248302035E-13
INTERPRO	IPR021072:MAGE_N	12	2.1201413427561837	6.12984e-12	4110, 4100, 4111, 4112, 4113, 4102, 4103, 4105, 4107, 728269, 4109, 158809	510	25	20603	19.391058823529413	7.956576952850014E-9	1.5913056726301764E-9	1.5802719661173321E-9
INTERPRO	IPR020479:Homeobox_metazoa	14	2.4734982332155475	4.69441e-07	343472, 1482, 56033, 3196, 3219, 3218, 2018, 3217, 3228, 3227, 3237, 3215, 3236, 3235	510	93	20603	6.0814252582753525	6.091489882152912E-4	1.0155574196115723E-4	1.0085158042213534E-4
INTERPRO	IPR036051:KRAB_dom_sf	30	5.30035335689046	1.39837e-06	345462, 9422, 7761, 162967, 54807, 91975, 26974, 163059, 92285, 146540, 81931, 400713, 80264, 147741, 342926, 7639, 7539, 10214, 7772, 170958, 353355, 63934, 100506243, 7691, 374899, 84436, 148206, 55713, 6756, 30832	510	434	20603	2.7924911900243967	0.0018134403725039716	2.388872876816983E-4	2.372309043310548E-4
INTERPRO	IPR001909:KRAB	30	5.30035335689046	1.61045e-06	345462, 9422, 7761, 162967, 54807, 91975, 26974, 163059, 92285, 146540, 81931, 400713, 80264, 147741, 342926, 7639, 7539, 10214, 7772, 170958, 353355, 63934, 100506243, 7691, 374899, 84436, 148206, 55713, 6756, 30832	510	437	20603	2.7733207699555793	0.0020881830591467088	2.388872876816983E-4	2.372309043310548E-4
INTERPRO	IPR017970:Homeobox_CS	19	3.356890459363958	1.65638e-06	5077, 5453, 343472, 1482, 56033, 3196, 23316, 3219, 3218, 2018, 3217, 3228, 3227, 3237, 3215, 3236, 401, 3235, 5309	510	194	20603	3.9565089953507173	0.002147677802299852	2.388872876816983E-4	2.372309043310548E-4
INTERPRO	IPR036236:Znf_C2H2_sf	42	7.420494699646643	8.06994e-06	345462, 9422, 7761, 129025, 162967, 54807, 7584, 90485, 91975, 26974, 163059, 92285, 146540, 91392, 255877, 140690, 11107, 81931, 400713, 115560, 148979, 80264, 57167, 147741, 55205, 342926, 5896, 7639, 7539, 7772, 8187, 9753, 170958, 353355, 63934, 7691, 374899, 84436, 148206, 646, 55713, 30832	510	796	20603	2.131554832988472	0.010420151166976033	0.0010474778787064626	0.0010402149350174346
INTERPRO	IPR013087:Znf_C2H2_type	42	7.420494699646643	2.01679e-05	345462, 9422, 7761, 129025, 162967, 54807, 7584, 90485, 91975, 26974, 163059, 92285, 146540, 91392, 255877, 140690, 11107, 81931, 400713, 115560, 148979, 80264, 57167, 147741, 55205, 342926, 7639, 7539, 7772, 8187, 9753, 170958, 353355, 63934, 7691, 374899, 55432, 84436, 148206, 646, 55713, 30832	510	828	20603	2.049175902244956	0.02583854060303714	0.0023798141541382933	0.002363313131497889
INTERPRO	IPR001356:Homeobox_dom	20	3.53356890459364	2.46384e-05	5077, 4990, 5453, 343472, 1482, 56033, 3196, 23316, 3219, 3218, 2018, 3217, 3228, 3227, 3237, 3215, 3236, 401, 3235, 5309	510	258	20603	3.1316309469524244	0.0314750976301541	0.0026650575145422822	0.0026465786873998472
INTERPRO	IPR009057:Homeobox-like_sf	22	3.8869257950530036	7.04213e-05	5076, 5077, 4990, 5453, 343472, 1482, 56033, 3196, 23316, 3219, 3218, 2018, 3217, 3228, 3227, 3237, 3215, 3236, 401, 3235, 283248, 5309	510	327	20603	2.717910895244948	0.08735660292818481	0.007031295365445656	0.006982542161833168
INTERPRO	IPR048271:PNMA_N	4	0.7067137809187279	0.00279232	83987, 84968, 29944, 114824	510	12	20603	13.466013071895425	0.9734706554470832	0.25888814882689476	0.2570930846208531
INTERPRO	IPR021156:TF_A-like/BEX	4	0.7067137809187279	0.00445333	51186, 90843, 84707, 55859	510	14	20603	11.542296918767507	0.9969521901140124	0.37338064889668415	0.37079172297983504
INTERPRO	IPR008160:Collagen	8	1.4134275618374559	0.00506668	115908, 1289, 1277, 1298, 1296, 1284, 51435, 1282	510	85	20603	3.802168396770473	0.9986304356601471	0.37338064889668415	0.37079172297983504
INTERPRO	IPR009050:Globin-like_sf	4	0.7067137809187279	0.00546551	3039, 3046, 114757, 3040	510	15	20603	10.77281045751634	0.999186113843693	0.37338064889668415	0.37079172297983504
INTERPRO	IPR012292:Globin/Proto	4	0.7067137809187279	0.00546551	3039, 3046, 114757, 3040	510	15	20603	10.77281045751634	0.999186113843693	0.37338064889668415	0.37079172297983504
INTERPRO	IPR000971:Globin	4	0.7067137809187279	0.00546551	3039, 3046, 114757, 3040	510	15	20603	10.77281045751634	0.999186113843693	0.37338064889668415	0.37079172297983504
INTERPRO	IPR020635:Tyr_kinase_cat_dom	8	1.4134275618374559	0.00732841	4916, 8711, 4882, 4486, 4058, 2044, 2064, 1956	510	91	20603	3.5514759750053866	0.9999286065708795	0.47561392728106766	0.47231614196093696
INTERPRO	IPR001245:Ser-Thr/Tyr_kinase_cat_dom	10	1.76678445229682	0.0133971	4916, 4881, 8711, 4882, 4486, 4058, 2044, 2064, 9175, 1956	510	152	20603	2.657765737874097	0.9999999750638628	0.8280672935742726	0.8223256867621243
INTERPRO	IPR031160:F_BAR	4	0.7067137809187279	0.0230294	23526, 9411, 8522, 9901	510	25	20603	6.463686274509804	0.9999999999999265	1.0	0.9938319198149576
INTERPRO	IPR018064:Metalthion_vert_metal_BS	3	0.5300353356890459	0.0240379	4495, 4496, 4489	510	10	20603	12.119411764705882	0.9999999999999808	1.0	0.9938319198149576
INTERPRO	IPR048270:PNMA_C	3	0.5300353356890459	0.0240379	84968, 29944, 114824	510	10	20603	12.119411764705882	0.9999999999999808	1.0	0.9938319198149576
INTERPRO	IPR000008:C2_dom	9	1.5901060070671376	0.0308703	5330, 83851, 57586, 5579, 255928, 5998, 6857, 84958, 8618	510	148	20603	2.456637519872814	1.0	1.0	0.9938319198149576
INTERPRO	IPR008266:Tyr_kinase_AS	7	1.2367491166077738	0.0346142	4916, 8711, 4486, 4058, 2044, 2064, 1956	510	98	20603	2.8855742296918767	1.0	1.0	0.9938319198149576
INTERPRO	IPR043203:VGCC_Ca_Na	3	0.5300353356890459	0.0396854	6326, 8913, 6329	510	13	20603	9.322624434389141	1.0	1.0	0.9938319198149576
INTERPRO	IPR026523:PNMA	3	0.5300353356890459	0.0396854	84968, 29944, 114824	510	13	20603	9.322624434389141	1.0	1.0	0.9938319198149576
INTERPRO	IPR023587:Metalthion_dom_sf_vert	3	0.5300353356890459	0.0455574	4495, 4496, 4489	510	14	20603	8.65672268907563	1.0	1.0	0.9938319198149576
INTERPRO	IPR000006:Metalthion_vert	3	0.5300353356890459	0.0455574	4495, 4496, 4489	510	14	20603	8.65672268907563	1.0	1.0	0.9938319198149576
INTERPRO	IPR035437:SNase_OB-fold_sf	3	0.5300353356890459	0.0455574	122402, 221400, 91646	510	14	20603	8.65672268907563	1.0	1.0	0.9938319198149576
INTERPRO	IPR017854:Metalthion_dom_sf	3	0.5300353356890459	0.0455574	4495, 4496, 4489	510	14	20603	8.65672268907563	1.0	1.0	0.9938319198149576
INTERPRO	IPR000566:Lipocln_cytosolic_FA-bd_dom	4	0.7067137809187279	0.0547621	116362, 5950, 1382, 1381	510	35	20603	4.616918767507003	1.0	1.0	0.9938319198149576
INTERPRO	IPR008625:GAGE_fam	4	0.7067137809187279	0.0627376	2543, 389860, 8712, 90737	510	37	20603	4.367355590885003	1.0	1.0	0.9938319198149576
INTERPRO	IPR000463:Fatty_acid-bd	3	0.5300353356890459	0.0648774	116362, 1382, 1381	510	17	20603	7.129065743944637	1.0	1.0	0.9938319198149576
INTERPRO	IPR031259:ILBP	3	0.5300353356890459	0.0648774	116362, 1382, 1381	510	17	20603	7.129065743944637	1.0	1.0	0.9938319198149576
INTERPRO	IPR031320:GAGE	4	0.7067137809187279	0.0669159	2543, 389860, 8712, 90737	510	38	20603	4.252425180598555	1.0	1.0	0.9938319198149576
INTERPRO	IPR027640:Kinesin-like_fam	4	0.7067137809187279	0.0669159	57576, 55083, 3798, 221458	510	38	20603	4.252425180598555	1.0	1.0	0.9938319198149576
INTERPRO	IPR046349:C1-like_sf	5	0.88339222614841	0.0702241	23526, 9411, 7145, 5579, 10125	510	63	20603	3.2061935885465296	1.0	1.0	0.9938319198149576
INTERPRO	IPR027417:P-loop_NTPase	31	5.477031802120141	0.0713696	285598, 55083, 116986, 204801, 122402, 122622, 168400, 51285, 29984, 51363, 215, 11144, 30845, 83871, 91646, 89797, 3798, 11269, 10058, 53904, 4166, 25830, 221458, 203, 116442, 57576, 55510, 4599, 85004, 9609, 1769	510	915	20603	1.368676738454945	1.0	1.0	0.9938319198149576
INTERPRO	IPR043541:SYT14/14L/16	2	0.35335689045936397	0.0723029	83851, 255928	510	3	20603	26.93202614379085	1.0	1.0	0.9938319198149576
INTERPRO	IPR006330:Ado/ade_deaminase	2	0.35335689045936397	0.0723029	51816, 161823	510	3	20603	26.93202614379085	1.0	1.0	0.9938319198149576
INTERPRO	IPR001365:A_deaminase_dom	2	0.35335689045936397	0.0723029	51816, 161823	510	3	20603	26.93202614379085	1.0	1.0	0.9938319198149576
INTERPRO	IPR021918:DUF3528	2	0.35335689045936397	0.0723029	3227, 3237	510	3	20603	26.93202614379085	1.0	1.0	0.9938319198149576
INTERPRO	IPR049328:TM_ErbB1	2	0.35335689045936397	0.0723029	2064, 1956	510	3	20603	26.93202614379085	1.0	1.0	0.9938319198149576
INTERPRO	IPR001170:ANPR/GUC	2	0.35335689045936397	0.0723029	4881, 4882	510	3	20603	26.93202614379085	1.0	1.0	0.9938319198149576
INTERPRO	IPR002339:Hemoglobin_pi	2	0.35335689045936397	0.0723029	3039, 3040	510	3	20603	26.93202614379085	1.0	1.0	0.9938319198149576
INTERPRO	IPR035892:C2_domain_sf	9	1.5901060070671376	0.0731048	7145, 5330, 83851, 57586, 5579, 255928, 5998, 6857, 84958	510	177	20603	2.054137587238285	1.0	1.0	0.9938319198149576
INTERPRO	IPR012674:Calycin	4	0.7067137809187279	0.0756405	116362, 5950, 1382, 1381	510	40	20603	4.039803921568628	1.0	1.0	0.9938319198149576
INTERPRO	IPR003655:aKRAB	3	0.5300353356890459	0.0790047	9422, 6756, 10214	510	19	20603	6.378637770897833	1.0	1.0	0.9938319198149576
INTERPRO	IPR001827:Homeobox_Antennapedia_CS	3	0.5300353356890459	0.0863943	3218, 3217, 3215	510	20	20603	6.059705882352941	1.0	1.0	0.9938319198149576
INTERPRO	IPR002219:PE/DAG-bd	5	0.88339222614841	0.0874404	23526, 9411, 7145, 5579, 10125	510	68	20603	2.970444059976932	1.0	1.0	0.9938319198149576
INTERPRO	IPR039583:TCFL5/SOLH1/2	2	0.35335689045936397	0.0952251	402381, 54937	510	4	20603	20.199019607843134	1.0	1.0	0.9938319198149576
INTERPRO	IPR016245:Tyr_kinase_EGF/ERB/XmrK_rcpt	2	0.35335689045936397	0.0952251	2064, 1956	510	4	20603	20.199019607843134	1.0	1.0	0.9938319198149576
INTERPRO	IPR006711:Hox9_activation_N	2	0.35335689045936397	0.0952251	3219, 3235	510	4	20603	20.199019607843134	1.0	1.0	0.9938319198149576
INTERPRO	IPR021774:CUPID	2	0.35335689045936397	0.0952251	55765, 55691	510	4	20603	20.199019607843134	1.0	1.0	0.9938319198149576
INTERPRO	IPR011545:DEAD/DEAH_box_helicase_dom	5	0.88339222614841	0.0986581	122402, 168400, 55510, 91646, 11269	510	71	20603	2.8449323391328365	1.0	1.0	0.9938319198149576
INTERPRO	IPR001752:Kinesin_motor_dom	4	0.7067137809187279	0.0994701	57576, 55083, 3798, 221458	510	45	20603	3.5909368191721134	1.0	1.0	0.9938319198149576
