# Supplementary material for: The domesticated transposon protein L1TD1 associates with its ancestor L1 ORF1p to promote LINE-1 retrotransposition
Source: eLife. 2025 Mar 20;13:RP96850. doi: 10.7554/eLife.96850 (PMC11925450; doi:10.7554/eLife.96850)
Supplement: Figure 1—figure supplement 2—source data 1. [file elife-96850-fig1-figsupp2-data1.xlsx]

## Sheet: 1A
LINE1 wt KO		Unpaired t test of LINE1 wt KO
WT	KO	Table Analyzed	LINE1 wt KO
44.2915	3.56453
37.3121	2.68334	Column B	KO
37.1597	1.67815	vs.	vs.
		Column A	WT
		Unpaired t test
		P value	0.0001
		P value summary	***
		Significantly different (P < 0.05)?	Yes
		One- or two-tailed P value?	Two-tailed
		t, df	t=15.30, df=4
		How big is the difference?
		Mean of column A	39.59
		Mean of column B	2.642
		Difference between means (B - A) ± SEM	-36.95 ± 2.415
		95% confidence interval	-43.65 to -30.24
		R squared (eta squared)	0.9832
		F test to compare variances
		F, DFn, Dfd	18.63, 2, 2
		P value	0.1019
		P value summary	ns
		Significantly different (P < 0.05)?	No
		Data analyzed
		Sample size, column A	3
		Sample size, column B	3

## Sheet: 1B
L1 ORF1 expression wt ko		Unpaired t test of L1 ORF1 expression wt ko
WT	KO	Table Analyzed	L1 ORF1 expression wt ko
0.61	0.8
0.56	1.07	Column B	KO
0.7	1.17	vs.	vs.
		Column A	WT
		Unpaired t test
		P value	0.0297
		P value summary	*
		Significantly different (P < 0.05)?	Yes
		One- or two-tailed P value?	Two-tailed
		t, df	t=3.309, df=4
		How big is the difference?
		Mean of column A	0.6233
		Mean of column B	1.013
		Difference between means (B - A) ± SEM	0.3900 ± 0.1179
		95% confidence interval	0.06279 to 0.7172
		R squared (eta squared)	0.7325
		F test to compare variances
		F, DFn, Dfd	7.278, 2, 2
		P value	0.2416
		P value summary	ns
		Significantly different (P < 0.05)?	No
		Data analyzed
		Sample size, column A	3
		Sample size, column B	3
