# Supplementary material for: The domesticated transposon protein L1TD1 associates with its ancestor L1 ORF1p to promote LINE-1 retrotransposition
Source: eLife. 2025 Mar 20;13:RP96850. doi: 10.7554/eLife.96850 (PMC11925450; doi:10.7554/eLife.96850)
Supplement: Figure 1—source data 1. [file elife-96850-fig1-data1.xlsx]

## Sheet: 1A
L1TD1
WT	KO	DKO
149.385	24.8426	30.1538
109.117	21.0875	23.8003
100.302	16.0517	26.9817
Ordinary one-way ANOVA of L1TD1
Number of families	1
Number of comparisons per family	3
Alpha	0.05
Tukey's multiple comparisons test	Mean Diff.	95.00% CI of diff.	Below threshold?	Summary	Adjusted P Value
WT vs. KO	98.94	60.28 to 137.6	Yes	***	0.0006	A-B
WT vs. DKO	92.62	53.97 to 131.3	Yes	***	0.0008	A-C
KO vs. DKO	-6.318	-44.97 to 32.34	No	ns	0.8733	B-C
Test details	Mean 1	Mean 2	Mean Diff.	SE of diff.	n1	n2	q	DF
WT vs. KO	119.6	20.66	98.94	12.6	3	3	11.11	6
WT vs. DKO	119.6	26.98	92.62	12.6	3	3	10.4	6
KO vs. DKO	20.66	26.98	-6.318	12.6	3	3	0.7092	6
Compact letter display
WT	A
DKO	B
KO	B

## Sheet: 1B
L1TD1 expression
KO	DKO	WT
1.03338	0.0805471	0.0036
0.665313	0.046892	0.0033
1.30131	0.0678975	0.0023
Ordinary one-way ANOVA of L1TD1 expression
Number of families	1
Number of comparisons per family	2
Alpha	0.05
Dunnett's multiple comparisons test	Mean Diff.	95.00% CI of diff.	Below threshold?	Summary	Adjusted P Value	A-?
KO vs. DKO	0.9349	0.5033 to 1.366	Yes	**	0.0015	B	DKO
KO vs. WT	0.9969	0.5654 to 1.428	Yes	**	0.001	C	WT
Test details	Mean 1	Mean 2	Mean Diff.	SE of diff.	n1	n2	q	DF
KO vs. DKO	1	0.06511	0.9349	0.1507	3	3	6.202	6
KO vs. WT	1	0.003067	0.9969	0.1507	3	3	6.614	6

## Sheet: 1F
new data set 07 24
	WT	WT	WT	WT	WT	WT	KO	KO	KO	KO	KO	KO	DKO	DKO	DKO	DKO	DKO	DKO
24h	0.974	1.03	1.03	1.05	0.987	0.928	0.94	1.04	0.99	1.03	0.99	1.01	0.894	0.99	0.957	1.01	1.03	1.13
48h	3.45	3.73	3.34	3.65	3.78	3.39	2.88	2.85	2.81	2.88	2.81	2.91	2.34	2.41	2.55	2.5	2.22	2.31
72h	9.77	10.1	9.77	10.7	10.9	10.1	7.23	8.14	7.58	8.11	7.87	8.05	3.34	2.94	3.15	3.11	3.54	2.28
96h	21.5	19.2	21.3	21.6	18.9	22.6	13.1	14	14.5	14.2	14.7	14.1	10.7	10.7	7.77	10.7	8.58	10.7
2way ANOVA of new data set 07 24
Within each row, compare columns (simple effects within rows)
Number of families	4
Number of comparisons per family	3
Alpha	0.05
Tukey's multiple comparisons test	Mean Diff.	95.00% CI of diff.	Below threshold?	Summary	Adjusted P Value
24h
WT vs. KO	-0.0005	-0.06579 to 0.06479	No	ns	0.9998
WT vs. DKO	-0.002	-0.1082 to 0.1042	No	ns	0.9984
KO vs. DKO	-0.0015	-0.1057 to 0.1027	No	ns	0.999
48h
WT vs. KO	0.7	0.4535 to 0.9465	Yes	***	0.0004
WT vs. DKO	1.168	0.9113 to 1.425	Yes	****	<0.0001
KO vs. DKO	0.4683	0.3064 to 0.6302	Yes	***	0.0003
72h
WT vs. KO	2.393	1.719 to 3.068	Yes	****	<0.0001
WT vs. DKO	7.163	6.443 to 7.884	Yes	****	<0.0001
KO vs. DKO	4.77	4.135 to 5.405	Yes	****	<0.0001
96h
WT vs. KO	6.75	4.819 to 8.681	Yes	****	<0.0001
WT vs. DKO	10.99	8.772 to 13.21	Yes	****	<0.0001
KO vs. DKO	4.242	2.491 to 5.993	Yes	***	0.0005
Test details	Mean 1	Mean 2	Mean Diff.	SE of diff.	N1	N2	q	DF
24h
WT vs. KO	0.9998	1	-0.0005	0.0236	6	6	0.02996	9.471
WT vs. DKO	0.9998	1.002	-0.002	0.03715	6	6	0.07614	7.994
KO vs. DKO	1	1.002	-0.0015	0.03533	6	6	0.06004	6.97
48h
WT vs. KO	3.557	2.857	0.7	0.07812	6	6	12.67	5.476
WT vs. DKO	3.557	2.388	1.168	0.0914	6	6	18.08	8.654
KO vs. DKO	2.857	2.388	0.4683	0.05298	6	6	12.5	6.085
72h
WT vs. KO	10.22	7.83	2.393	0.2431	6	6	13.92	9.319
WT vs. DKO	10.22	3.06	7.163	0.2626	6	6	38.58	9.921
KO vs. DKO	7.83	3.06	4.77	0.2302	6	6	29.31	9.666
96h
WT vs. KO	20.85	14.1	6.75	0.6407	6	6	14.9	6.401
WT vs. DKO	20.85	9.858	10.99	0.8084	6	6	19.23	9.902
KO vs. DKO	14.1	9.858	4.242	0.5879	6	6	10.2	6.693

## Sheet: 1G
hours	HAP1 WT	HAP1 WT	HAP1 WT	HAP1 WT	HAP1 WT	HAP1 WT	DNMT1 KO	DNMT1 KO	DNMT1 KO	DNMT1 KO	DNMT1 KO	DNMT1 KO	L1TD1 KO	L1TD1 KO	L1TD1 KO	L1TD1 KO	L1TD1 KO	L1TD1 KO	DNMT1/L1TD1 KO	DNMT1/L1TD1 KO	DNMT1/L1TD1 KO	DNMT1/L1TD1 KO	DNMT1/L1TD1 KO	DNMT1/L1TD1 KO
24	1010000	1070000	1070000	1100000	1030000	966000	1430000	1590000	1510000	1570000	1520000	1530000	1470000	1340000	1480000	1390000	1470000	1370000	731000	810000	783000	822000	840000	922000
48	3590000	3880000	3480000	3800000	3940000	3530000	4390000	4350000	4280000	4400000	4280000	4440000	4070000	3700000	3870000	3990000	4080000	3740000	1910000	1980000	2080000	2050000	1820000	1890000
72	10200000	10500000	10200000	11200000	11300000	10500000	11000000	12400000	11600000	12400000	12000000	12300000	9650000	10300000	10100000	10100000	10800000	10500000	5100000	4490000	4810000	4750000	5410000	3480000
96	22400000	20000000	22200000	22500000	19700000	23500000	20000000	21400000	22100000	21700000	22400000	21600000	20400000	19400000	20100000	19600000	21400000	20600000	8790000	8740000	6360000	8780000	7020000	8750000
Table Analyzed	t-test 500cell 96h
Column D	DNMT1/L1TD1 KO
vs.	vs.
Column B	DNMT1 KO
Unpaired t test
P value	<0.0001
P value summary	****
Significantly different (P < 0.05)?	Yes
One- or two-tailed P value?	Two-tailed
t, df	t=24.00, df=10
How big is the difference?
Mean of column B	21533333
Mean of column D	8073333
Difference between means (D - B) ¬± SEM	-13460000 ¬± 560763
95% confidence interval	-14709459 to -12210541
R squared (eta squared)	0.9829
F test to compare variances
F, DFn, Dfd	1.716, 5, 5
P value	0.5678
P value summary	ns
Significantly different (P < 0.05)?	No
Data analyzed
Sample size, column B	6
Sample size, column D	6
