# Supplementary material for: The domesticated transposon protein L1TD1 associates with its ancestor L1 ORF1p to promote LINE-1 retrotransposition
Source: eLife. 2025 Mar 20;13:RP96850. doi: 10.7554/eLife.96850 (PMC11925450; doi:10.7554/eLife.96850)
Supplement: Figure 2—figure supplement 1—source data 1. [file elife-96850-fig2-figsupp1-data1.xlsx]

## Sheet: 2S1A
		gene_id	lfcSE_IP	pvalue_IP	padj_IP	log2FC_IP_shrunk	gene_name_IP	gene_name_DB	group	highlight
	10	ENSG00000104442	0.459826	1.29e-23	2.56e-20	4.7596	ARMC1	ARMC1	highlight	ARMC1
	1337	ENSG00000240563	0.663548	0.000985377	0.0146321	1.825	L1TD1	L1TD1	highlight	L1TD1
	520	ENSG00000213463	0.645479	1.25e-05	0.000478123	2.57983	SYNJ2BP	SYNJ2BP	highlight	SYNJ2BP
	2	ENSG00000247627	0.585245	6.65e-34	6.59e-30	7.01183	MTND4P12	MTND4P12	up
	3	ENSG00000240376	0.431482	6.46e-30	4.27e-26	5.11088		RPS8P8	up
	4	ENSG00000142937	0.429273	4.04e-28	2e-24	4.9121	RPS8	RPS8	up
	5	ENSG00000181163	0.250587	1.35e-26	5.35e-23	2.68012	NPM1	NPM1	up
	6	ENSG00000287530	1.27482	1.82e-25	6.02e-22	10.2144			up
	7	ENSG00000273723	0.904671	6.25e-24	1.77e-20	7.39367	SUGT1-DT	SUGT1-DT	up
	8	ENSG00000070756	0.316296	1.04e-23	2.56e-20	3.1967	PABPC1	PABPC1	up
	9	ENSG00000089009	0.33367	1.27e-23	2.56e-20	3.37394	RPL6	RPL6	up
	11	ENSG00000285458	1.33806	2.36e-23	4.25e-20	11.1838		C4orf36	up
	12	ENSG00000264956	1.34563	6.1e-21	1.01e-17	10.8313			up
	13	ENSG00000248527	0.539682	4.83e-20	7.36e-17	5.13456	MTATP6P1	MTATP6P1	up
	14	ENSG00000133739	0.401373	1.3e-19	1.85e-16	3.65147	LRRCC1	LRRCC1	up
	15	ENSG00000277998	0.482349	1.48e-19	1.95e-16	4.36902		EIF3EP3	up
	16	ENSG00000198918	0.33633	5.53e-19	6.86e-16	2.99039	RPL39	RPL39	up
	17	ENSG00000198899	0.471199	1.22e-18	1.42e-15	4.22983	MT-ATP6	ATP6	up
	18	ENSG00000068489	0.368063	2.35e-18	2.59e-15	3.2198	PRR11	PRR11	up
	19	ENSG00000164168	0.56998	2.84e-18	2.96e-15	5.09676	TMEM184C	TMEM184C	up
	20	ENSG00000197958	0.311416	4.24e-18	4e-15	2.6842	RPL12	RPL12	up
	21	ENSG00000289304	1.38335	4.22e-18	4e-15	10.7724			up
	22	ENSG00000060982	0.324648	1.21e-17	1.09e-14	2.76026	BCAT1	BCAT1	up
	23	ENSG00000171490	0.25107	1.29e-17	1.11e-14	2.11922	RSL1D1	RSL1D1	up
	24	ENSG00000159445	0.289157	1.52e-17	1.26e-14	2.4367	THEM4	THEM4	up
	25	ENSG00000198886	0.414587	1.98e-17	1.57e-14	3.53858	MT-ND4	ND4	up
	26	ENSG00000198763	0.435623	2.42e-17	1.85e-14	3.71797	MT-ND2	ND2	up
	27	ENSG00000198938	0.530559	4.72e-17	3.47e-14	4.55398	MT-CO3	COX3	up
	28	ENSG00000073803	0.263503	4.96e-17	3.51e-14	2.18047	MAP3K13	MAP3K13	up
	29	ENSG00000188846	0.313371	1.38e-16	9.46e-14	2.565	RPL14	RPL14	up
	30	ENSG00000186687	0.351826	1.82e-16	1.2e-13	2.87308	LYRM7	LYRM7	up
	31	ENSG00000287016	0.835264	4.18e-16	2.67e-13	6.01998			up
	32	ENSG00000198727	0.445918	6.69e-16	4.14e-13	3.61272	MT-CYB	CYTB	up
	33	ENSG00000139168	0.245368	8.27e-16	4.97e-13	1.94304	ZCRB1	ZCRB1	up
	34	ENSG00000210196	0.523048	9.25e-16	5.39e-13	4.26149	MT-TP	MT-TP	up
	35	ENSG00000109790	0.360924	9.53e-16	5.4e-13	2.86547	KLHL5	KLHL5	up
	36	ENSG00000226476	0.94498	1.04e-15	5.61e-13	6.26746	LINC01748	LINC01748	up
	37	ENSG00000249353	0.290004	1.05e-15	5.61e-13	2.28694	NPM1P27	NPM1P27	up
	38	ENSG00000243199	0.439855	1.93e-15	1.01e-12	3.46815		RPL6P10	up
	39	ENSG00000134597	0.354845	2.08e-15	1.01e-12	2.78511	RBMX2	RBMX2	up
	40	ENSG00000198712	0.471167	2.04e-15	1.01e-12	3.75776	MT-CO2	COX2	up
	41	ENSG00000249395	0.50009	2.06e-15	1.01e-12	3.99793	CASC9	CASC9	up
	42	ENSG00000117477	0.359649	7.93e-15	3.66e-12	2.74129	CCDC181	CCDC181	up
	43	ENSG00000209082	0.685809	7.8e-15	3.66e-12	5.53015	MT-TL1	MT-TL1	up
	44	ENSG00000198804	0.437067	8.46e-15	3.81e-12	3.38206	MT-CO1	COX1	up
	45	ENSG00000249780	0.80543	1.2e-14	5.27e-12	5.71132			up
	46	ENSG00000120686	0.265565	1.31e-14	5.63e-12	2.00822	UFM1	UFM1	up
	47	ENSG00000156256	0.284444	2.18e-14	9.21e-12	2.16058	USP16	USP16	up
	48	ENSG00000253363	1.45378	3.47e-14	1.43e-11	10.4019			up
	49	ENSG00000235174	0.401601	3.55e-14	1.43e-11	3.00791	RPL39P3	RPL39P3	up
	50	ENSG00000241316	1.49947	3.76e-14	1.49e-11	9.24963	SUCLG2-AS1	SUCLG2-DT	up
	51	ENSG00000155621	0.359399	4.85e-14	1.89e-11	2.66716	C9orf85	C9orf85	up
	52	ENSG00000122034	0.308037	5.44e-14	2.08e-11	2.27487	GTF3A	GTF3A	up
	53	ENSG00000288728	1.39698	8.96e-14	3.35e-11	9.5465			up
	54	ENSG00000247137	1.46032	1.26e-13	4.64e-11	10.3593	ANKRD42-DT	ANKRD42-DT	up
	55	ENSG00000286445	1.35383	1.49e-13	5.39e-11	8.82733			up
	56	ENSG00000154479	1.37621	1.6e-13	5.68e-11	8.38321	CCDC173	CFAP210	up
	57	ENSG00000146233	1.37876	1.9e-13	6.61e-11	9.13863	CYP39A1	CYP39A1	up
	58	ENSG00000166510	1.44552	1.94e-13	6.62e-11	10.0362	CCDC68	CCDC68	up
	59	ENSG00000173209	1.10805	2.32e-13	7.79e-11	6.78883	AHSA2P	AHSA2P	up
	60	ENSG00000214184	1.40182	2.51e-13	8.29e-11	9.43131	GCC2-AS1	GCC2-AS1	up
	61	ENSG00000254044	0.992849	4.25e-13	1.38e-10	6.15269			up
	62	ENSG00000131778	1.33381	8.13e-13	2.56e-10	8.30872	CHD1L	CHD1L	up
	63	ENSG00000203952	1.49687	8.06e-13	2.56e-10	10.4003	CCDC160	CCDC160	up
	64	ENSG00000164038	0.443131	9.98e-13	3.09e-10	3.08175	SLC9B2	SLC9B2	up
	65	ENSG00000124097	0.25966	1.56e-12	4.75e-10	1.78921	HMGB1P1	HMGB1P1	up
	66	ENSG00000118690	1.44658	1.85e-12	5.56e-10	9.65911	ARMC2	ARMC2	up
	67	ENSG00000288823	1.37881	2.08e-12	6.16e-10	8.77453			up
	68	ENSG00000188693	1.47925	2.17e-12	6.25e-10	10.0573	CYP51A1-AS1	CYP51A1-AS1	up
	69	ENSG00000198786	0.37987	2.15e-12	6.25e-10	2.62103	MT-ND5	ND5	up
	70	ENSG00000286760	1.48275	2.43e-12	6.88e-10	10.0694		LOC100289495	up
	71	ENSG00000270816	0.4988	2.58e-12	7.2e-10	3.44456	LINC00221	LINC00221	up
	72	ENSG00000258947	1.30221	3.41e-12	9.4e-10	7.63523	TUBB3	TUBB3	up
	73	ENSG00000119917	1.42122	3.7e-12	1.01e-09	7.56831	IFIT3	IFIT3	up
	74	ENSG00000147905	0.329114	5.31e-12	1.42e-09	2.21354	ZCCHC7	ZCCHC7	up
	75	ENSG00000242615	0.695561	7.02e-12	1.86e-09	4.67228			up
	76	ENSG00000102753	0.392636	7.67e-12	2e-09	2.62524	KPNA3	KPNA3	up
	77	ENSG00000128915	0.250705	7.75e-12	2e-09	1.66449	ICE2	ICE2	up
	78	ENSG00000174444	0.287682	7.88e-12	2e-09	1.91571	RPL4	RPL4	up
	79	ENSG00000155906	0.275474	8.92e-12	2.24e-09	1.82992	RMND1	RMND1	up
	80	ENSG00000269994	1.44001	9.82e-12	2.43e-09	7.6088	LINC02893	LINC02893	up
	81	ENSG00000226043	1.35489	1.2e-11	2.94e-09	6.59963			up
	82	ENSG00000155962	1.44177	1.27e-11	3.07e-09	7.57994	CLIC2	CLIC2	up
	83	ENSG00000118181	0.402973	1.39e-11	3.28e-09	2.66357	RPS25	RPS25	up
	84	ENSG00000163807	0.307973	1.39e-11	3.28e-09	2.02288	KIAA1143	KIAA1143	up
	85	ENSG00000168803	0.385784	1.76e-11	4.12e-09	2.52569	ADAL	ADAL	up
	86	ENSG00000163512	0.299369	2.04e-11	4.7e-09	1.94432	AZI2	AZI2	up
	87	ENSG00000259804	1.50095	2.14e-11	4.87e-09	9.76426	CTCF-DT	CTCF-DT	up
	88	ENSG00000198888	0.499187	2.73e-11	6.15e-09	3.28073	MT-ND1	ND1	up
	89	ENSG00000236111	0.763711	2.95e-11	6.56e-09	4.80437		RPL6P1	up
	90	ENSG00000255302	0.212407	3.07e-11	6.77e-09	1.37529	EID1	EID1	up
	91	ENSG00000214765	0.479704	3.2e-11	6.97e-09	3.1097	SEPTIN7P2	SEPTIN7P2	up
	92	ENSG00000230091	1.43014	4.13e-11	8.89e-09	9.09214	TMEM254-AS1	TMEM254-AS1	up
	93	ENSG00000104320	0.293939	4.65e-11	9.91e-09	1.87136	NBN	NBN	up
	94	ENSG00000289586	1.46114	4.71e-11	9.93e-09	9.17571			up
	95	ENSG00000122406	0.36804	5.1e-11	1.06e-08	2.35096	RPL5	RPL5	up
	96	ENSG00000196074	1.5923	5.33e-11	1.1e-08	10.5261	SYCP2	SYCP2	up
	97	ENSG00000227437	0.853422	5.9e-11	1.21e-08	5.67583	RPS8P4	RPS8P4	up
	98	ENSG00000055211	0.337555	6.29e-11	1.27e-08	2.13996	GINM1	GINM1	up
	99	ENSG00000248275	0.309005	7.92e-11	1.59e-08	1.94331	TRIM52-AS1	TRIM52-AS1	up
	100	ENSG00000107890	0.467395	8.29e-11	1.64e-08	2.96325	ANKRD26	ANKRD26	up
	101	ENSG00000138587	0.341175	8.44e-11	1.66e-08	2.14412	MNS1	MNS1	up
	102	ENSG00000262902	0.475702	8.86e-11	1.72e-08	3.00964	MTCO1P40	MTCO1P40	up
	103	ENSG00000228043	1.4439	1.42e-10	2.73e-08	8.74359			up
	104	ENSG00000164346	0.404256	1.48e-10	2.81e-08	2.51785	NSA2	NSA2	up
	105	ENSG00000182670	0.381466	1.51e-10	2.85e-08	2.36717	TTC3	TTC3	up
	106	ENSG00000210049	0.702371	1.73e-10	3.23e-08	4.42757	MT-TF	MT-TF	up
	107	ENSG00000233668	0.597191	1.81e-10	3.35e-08	3.74795		RPS8P9	up
	108	ENSG00000111832	0.285439	1.93e-10	3.5e-08	1.77135	RWDD1	RWDD1	up
	109	ENSG00000172554	1.4308	1.91e-10	3.5e-08	6.9967	SNTG2	SNTG2	up
	110	ENSG00000134873	1.1454	2.16e-10	3.9e-08	4.94393	CLDN10	CLDN10	up
	111	ENSG00000197061	0.437476	2.43e-10	4.34e-08	2.69369	H4C3	H4C3	up
	112	ENSG00000270362	1.42147	2.86e-10	5.07e-08	6.81759	HMGN3-AS1	HMGN3-AS1	up
	113	ENSG00000107341	0.320629	3.36e-10	5.9e-08	1.94476	UBE2R2	UBE2R2	up
	114	ENSG00000290015	1.49301	3.54e-10	6.16e-08	9.05631	NA	NA	up
	115	ENSG00000257261	1.28906	3.66e-10	6.29e-08	6.30583			up
	116	ENSG00000289860	1.43639	3.68e-10	6.29e-08	6.92804	NA	NA	up
	118	ENSG00000264964	1.52536	4.17e-10	7.01e-08	9.37207	TWSG1-DT	TWSG1-DT	up
	119	ENSG00000251602	0.611455	4.4e-10	7.34e-08	3.73088		MTA1-DT	up
	120	ENSG00000066855	0.232349	4.52e-10	7.47e-08	1.39966	MTFR1	MTFR1	up
	121	ENSG00000210077	0.637494	4.62e-10	7.57e-08	3.92498	MT-TV	MT-TV	up
	122	ENSG00000255150	1.40709	4.67e-10	7.58e-08	8.12184	EID3	EID3	up
	123	ENSG00000197744	0.510008	4.79e-10	7.72e-08	3.08589	PTMAP2	PTMAP2	up
	124	ENSG00000278615	1.24447	4.88e-10	7.8e-08	5.83838	C11orf98	C11orf98	up
	125	ENSG00000283108	1.40282	5.77e-10	9.15e-08	6.52152			up
	126	ENSG00000286931	1.46746	6.96e-10	1.1e-07	8.62372			up
	127	ENSG00000186468	0.458535	8.89e-10	1.39e-07	2.72486	RPS23	RPS23	up
	128	ENSG00000142856	0.294165	9.05e-10	1.4e-07	1.73784	ITGB3BP	ITGB3BP	up
	129	ENSG00000176105	0.548549	1.04e-09	1.6e-07	3.26256	YES1	YES1	up
	130	ENSG00000173930	1.5766	1.1e-09	1.67e-07	9.5781	SLCO4C1	SLCO4C1	up
	131	ENSG00000110944	1.48184	1.12e-09	1.7e-07	8.68297	IL23A	IL23A	up
	132	ENSG00000089682	0.52142	1.14e-09	1.71e-07	3.08054	RBM41	RBM41	up
	133	ENSG00000136828	1.46279	1.21e-09	1.81e-07	8.45134	RALGPS1	RALGPS1	up
	134	ENSG00000232434	0.839628	1.25e-09	1.85e-07	4.95628	AJM1	AJM1	up
	135	ENSG00000023287	0.446307	1.39e-09	2.04e-07	2.61168	RB1CC1	RB1CC1	up
	136	ENSG00000245468	1.53301	1.43e-09	2.08e-07	9.11286	LINC02447	LINC02447	up
	137	ENSG00000063046	0.298369	1.56e-09	2.26e-07	1.73472	EIF4B	EIF4B	up
	138	ENSG00000210195	0.818417	1.66e-09	2.36e-07	4.96416	MT-TT	MT-TT	up
	139	ENSG00000289074	1.49473	1.66e-09	2.36e-07	8.73921			up
	140	ENSG00000269335	1.32587	1.67e-09	2.37e-07	5.55498	IKBKG	IKBKG	up
	141	ENSG00000230629	0.464162	1.83e-09	2.58e-07	2.69812	RPS23P8	RPS23P8	up
	142	ENSG00000015479	0.444451	2.06e-09	2.85e-07	2.54745	MATR3	MATR3	up
	143	ENSG00000163491	1.5516	2.05e-09	2.85e-07	9.18316	NEK10	NEK10	up
	145	ENSG00000228232	0.373032	2.31e-09	3.16e-07	2.14087	GAPDHP1	GAPDHP1	up
	146	ENSG00000145741	0.288131	2.35e-09	3.19e-07	1.65547	BTF3	BTF3	up
	147	ENSG00000197008	0.579858	2.44e-09	3.28e-07	3.36571	ZNF138	ZNF138	up
	148	ENSG00000165669	0.310652	2.59e-09	3.47e-07	1.78036	FAM204A	FAM204A	up
	149	ENSG00000148019	0.334178	2.63e-09	3.5e-07	1.90973	CEP78	CEP78	up
	150	ENSG00000259687	1.09064	3e-09	3.96e-07	5.238	LINC01220	LINC01220	up
	151	ENSG00000210164	0.945048	3.13e-09	4.11e-07	5.13949	MT-TG	MT-TG	up
	152	ENSG00000284484	1.44931	3.9e-09	5.08e-07	8.13504		CPHXL2	up
	153	ENSG00000153363	0.271682	3.96e-09	5.1e-07	1.5375	LINC00467	LINC00467	up
	154	ENSG00000287808	1.47221	3.95e-09	5.1e-07	7.48441			up
	155	ENSG00000274391	0.803218	4.38e-09	5.61e-07	4.48389	TPTE	TPTE	up
	156	ENSG00000236824	1.54422	4.44e-09	5.64e-07	10.4922	BCYRN1	BCYRN1	up
	158	ENSG00000126653	0.318702	4.86e-09	6.09e-07	1.79097	NSRP1	NSRP1	up
	159	ENSG00000204642	0.727706	5.18e-09	6.46e-07	4.06322	HLA-F	HLA-F	up
	160	ENSG00000203668	0.361697	5.4e-09	6.69e-07	2.0189	CHML	CHML	up
	161	ENSG00000173960	0.396228	5.54e-09	6.82e-07	2.2161	UBXN2A	UBXN2A	up
	162	ENSG00000144746	0.235047	5.91e-09	7.23e-07	1.31672	ARL6IP5	ARL6IP5	up
	163	ENSG00000111981	0.316403	6.07e-09	7.38e-07	1.74887	ULBP1	ULBP1	up
	164	ENSG00000110011	0.333255	6.23e-09	7.53e-07	1.85388	DNAJC4	DNAJC4	up
	165	ENSG00000111641	1.43041	6.77e-09	8.13e-07	7.75813	NOP2	NOP2	up
	166	ENSG00000213051	0.669075	6.89e-09	8.23e-07	3.64658	RPL5P5	RPL5P5	up
	167	ENSG00000164620	1.41962	7.04e-09	8.36e-07	7.64334	RELL2	RELL2	up
	168	ENSG00000101132	0.376821	7.41e-09	8.75e-07	2.08843	PFDN4	PFDN4	up
	169	ENSG00000185532	1.12485	7.5e-09	8.8e-07	5.76587	PRKG1	PRKG1	up
	170	ENSG00000044459	0.311674	8.49e-09	9.9e-07	1.71696	CNTLN	CNTLN	up
	171	ENSG00000105672	1.50693	9.43e-09	1.09e-06	8.38465	ETV2	ETV2	up
	172	ENSG00000101966	0.448277	1.02e-08	1.17e-06	2.45746	XIAP	XIAP	up
	173	ENSG00000116005	0.452082	1.02e-08	1.17e-06	2.48516	PCYOX1	PCYOX1	up
	174	ENSG00000156052	0.459237	1.02e-08	1.17e-06	2.51808	GNAQ	GNAQ	up
	175	ENSG00000260942	1.5669	1.06e-08	1.2e-06	8.93416	CAPN10-DT	CAPN10-DT	up
	176	ENSG00000151466	0.440995	1.11e-08	1.25e-06	2.40736	SCLT1	SCLT1	up
	177	ENSG00000117500	0.35367	1.25e-08	1.4e-06	1.92496	TMED5	TMED5	up
	178	ENSG00000187514	0.325721	1.43e-08	1.59e-06	1.76653	PTMA	PTMA	up
	179	ENSG00000196284	0.437902	1.52e-08	1.69e-06	2.36789	SUPT3H	SUPT3H	up
	180	ENSG00000132967	0.308095	1.67e-08	1.84e-06	1.66602	HMGB1P5	HMGB1P5	up
	181	ENSG00000286033	1.27125	1.69e-08	1.86e-06	5.45292			up
	182	ENSG00000110435	0.212879	1.73e-08	1.87e-06	1.15477	PDHX	PDHX	up
	183	ENSG00000131019	0.434584	1.73e-08	1.87e-06	2.33962	ULBP3	ULBP3	up
	184	ENSG00000134419	0.426934	1.9e-08	2.05e-06	2.29511	RPS15A	RPS15A	up
	185	ENSG00000122203	0.528272	2.21e-08	2.37e-06	2.83829	KIAA1191	KIAA1191	up
	186	ENSG00000272631	1.43629	2.22e-08	2.37e-06	7.528			up
	187	ENSG00000269846	1.61667	2.29e-08	2.43e-06	9.04145			up
	189	ENSG00000272356	1.70048	2.41e-08	2.53e-06	9.75078			up
	190	ENSG00000150776	0.344001	2.49e-08	2.6e-06	1.82778	NKAPD1	NKAPD1	up
	191	ENSG00000280132	1.52915	2.55e-08	2.65e-06	7.37357			up
	192	ENSG00000196387	1.46566	2.58e-08	2.66e-06	7.75976	ZNF140	ZNF140	up
	193	ENSG00000144674	0.574598	2.59e-08	2.66e-06	3.07679	GOLGA4	GOLGA4	up
	194	ENSG00000280079	0.762688	2.62e-08	2.67e-06	4.07549			up
	195	ENSG00000258925	0.703691	2.71e-08	2.75e-06	3.72623	NPM1P5	NPM1P5	up
	196	ENSG00000139239	0.415813	2.82e-08	2.86e-06	2.20245	RPL14P1	RPL14P1	up
	197	ENSG00000198744	1.41135	3.12e-08	3.14e-06	8.35769	MTCO3P12	MTCO3P12	up
	198	ENSG00000170522	0.277364	3.15e-08	3.15e-06	1.4664	ELOVL6	ELOVL6	up
	199	ENSG00000151012	0.287438	3.27e-08	3.25e-06	1.5173	SLC7A11	SLC7A11	up
	200	ENSG00000279134	1.46596	3.27e-08	3.25e-06	6.26641			up
	201	ENSG00000196119	1.97807	3.51e-08	3.47e-06	11.6679	OR8A1	OR8A1	up
	202	ENSG00000083845	0.198582	3.55e-08	3.48e-06	1.05476	RPS5	RPS5	up
	203	ENSG00000069943	1.19873	3.88e-08	3.79e-06	5.57272	PIGB	PIGB	up
	204	ENSG00000064547	1.42603	4.31e-08	4.19e-06	7.31365	LPAR2	LPAR2	up
	205	ENSG00000231074	0.438657	4.34e-08	4.2e-06	2.28427	HCG18	HCG18	up
	206	ENSG00000229344	1.1301	4.41e-08	4.25e-06	5.04612	MTCO2P12	MTCO2P12	up
	207	ENSG00000113328	0.447705	4.51e-08	4.3e-06	2.33185	CCNG1	CCNG1	up
	208	ENSG00000171791	0.72881	4.5e-08	4.3e-06	3.80751	BCL2	BCL2	up
	209	ENSG00000037757	0.510963	4.7e-08	4.46e-06	2.6587	MRI1	MRI1	up
	210	ENSG00000163050	1.45876	4.75e-08	4.48e-06	7.53021	COQ8A	COQ8A	up
	211	ENSG00000248238	0.977559	5.76e-08	5.41e-06	4.84975	LINC02438	LINC02438	up
	212	ENSG00000267892	1.79516	5.94e-08	5.55e-06	10.2394			up
	213	ENSG00000006634	0.28013	6.03e-08	5.61e-06	1.44893	DBF4	DBF4	up
	214	ENSG00000187736	0.904944	6.11e-08	5.66e-06	4.39631	NHEJ1	NHEJ1	up
	215	ENSG00000122483	0.353805	6.91e-08	6.35e-06	1.81102	CCDC18	CCDC18	up
	216	ENSG00000198807	0.846936	6.89e-08	6.35e-06	4.26345	PAX9	PAX9	up
	217	ENSG00000166200	0.3992	7.31e-08	6.68e-06	2.03871	COPS2	COPS2	up
	219	ENSG00000269559	1.53051	8.28e-08	7.49e-06	7.98303			up
	220	ENSG00000113810	0.290484	8.66e-08	7.81e-06	1.48586	SMC4	SMC4	up
	221	ENSG00000114857	0.418439	8.83e-08	7.92e-06	2.12041	NKTR	NKTR	up
	222	ENSG00000106648	0.917155	9.3e-08	8.31e-06	4.7342	GALNTL5	GALNTL5	up
	223	ENSG00000112232	1.70879	9.73e-08	8.65e-06	9.39003	KHDRBS2	KHDRBS2	up
	224	ENSG00000261441	1.45256	9.89e-08	8.75e-06	7.30068	POLG-DT	POLG-DT	up
	225	ENSG00000158290	0.52544	1.09e-07	9.55e-06	2.64751	CUL4B	CUL4B	up
	226	ENSG00000214485	0.336367	1.08e-07	9.55e-06	1.6911	RPL7P1	RPL7P1	up
	227	ENSG00000234797	0.348667	1.12e-07	9.75e-06	1.752	RPS3AP6	RPS3AP6	up
	229	ENSG00000101846	1.49305	1.2e-07	1.04e-05	7.62478	STS	STS	up
	230	ENSG00000087502	0.296197	1.22e-07	1.05e-05	1.48921	ERGIC2	ERGIC2	up
	231	ENSG00000288772	1.54456	1.26e-07	1.08e-05	7.98041			up
	232	ENSG00000166037	0.500899	1.31e-07	1.12e-05	2.50504	CEP57	CEP57	up
	233	ENSG00000244968	1.09704	1.33e-07	1.13e-05	5.00725	LIFR-AS1	LIFR-AS1	up
	234	ENSG00000144895	0.347207	1.45e-07	1.23e-05	1.73056	EIF2A	EIF2A	up
	235	ENSG00000137831	0.3817	1.5e-07	1.26e-05	1.89737	UACA	UACA	up
	236	ENSG00000288107	1.84578	1.58e-07	1.33e-05	9.87529			up
	237	ENSG00000182552	0.347077	1.64e-07	1.37e-05	1.71777	RWDD4	RWDD4	up
	238	ENSG00000210184	0.594566	1.66e-07	1.38e-05	2.96308	MT-TS2	MT-TS2	up
	239	ENSG00000159761	0.948032	1.71e-07	1.42e-05	4.6165	C16orf86	C16orf86	up
	241	ENSG00000126777	0.428001	1.86e-07	1.52e-05	2.10616	KTN1	KTN1	up
	242	ENSG00000196922	0.501277	1.87e-07	1.52e-05	2.46629	ZNF252P	ZNF252P	up
	243	ENSG00000247317	1.52854	1.87e-07	1.52e-05	7.72445	LY6E-DT	LY6E-DT	up
	244	ENSG00000281327	1.54824	1.85e-07	1.52e-05	6.90863	LINC01338	LINC01338	up
	245	ENSG00000136104	0.248122	1.92e-07	1.55e-05	1.23247	RNASEH2B	RNASEH2B	up
	246	ENSG00000048991	0.393067	1.99e-07	1.6e-05	1.92939	R3HDM1	R3HDM1	up
	247	ENSG00000197608	1.67827	2.01e-07	1.61e-05	8.8648	ZNF841	ZNF841	up
	248	ENSG00000144713	0.32018	2.04e-07	1.63e-05	1.57638	RPL32	RPL32	up
	249	ENSG00000198755	0.387184	2.11e-07	1.68e-05	1.89968	RPL10A	RPL10A	up
	250	ENSG00000147677	0.279244	2.4e-07	1.91e-05	1.37033	EIF3H	EIF3H	up
	251	ENSG00000092929	1.57659	2.51e-07	1.97e-05	7.98762	UNC13D	UNC13D	up
	252	ENSG00000164294	0.371334	2.52e-07	1.97e-05	1.80558	GPX8	GPX8	up
	253	ENSG00000288996	0.974799	2.5e-07	1.97e-05	4.45946			up
	254	ENSG00000224846	1.46071	2.58e-07	2.01e-05	7.08736	NQO2-AS1	NQO2-AS1	up
	255	ENSG00000196437	0.652665	2.63e-07	2.04e-05	3.19748	ZNF569	ZNF569	up
	257	ENSG00000135248	1.82924	2.84e-07	2.19e-05	9.64297	FAM71F1	GARIN1B	up
	258	ENSG00000286667	0.832284	2.86e-07	2.19e-05	4.04507			up
	259	ENSG00000227110	1.02554	2.87e-07	2.2e-05	4.84948	LMCD1-AS1	LMCD1-AS1	up
	260	ENSG00000247950	1.57198	2.89e-07	2.21e-05	7.93064	SEC24B-AS1	SEC24B-AS1	up
	261	ENSG00000137501	0.759653	3.02e-07	2.29e-05	3.68662	SYTL2	SYTL2	up
	262	ENSG00000198840	0.64651	3.03e-07	2.29e-05	3.15311	MT-ND3	ND3	up
	263	ENSG00000184785	0.453545	3.11e-07	2.34e-05	2.1807	SMIM10	SMIM10	up
	264	ENSG00000136770	0.315758	3.15e-07	2.36e-05	1.52714	DNAJC1	DNAJC1	up
	265	ENSG00000251364	1.94424	3.21e-07	2.4e-05	10.4156		SYT9-AS1	up
	266	ENSG00000172746	0.879195	3.31e-07	2.47e-05	4.25966	RPL12P13	RPL12P13	up
	267	ENSG00000152558	0.272434	3.52e-07	2.61e-05	1.31899	TMEM123	TMEM123	up
	268	ENSG00000198464	0.497764	3.54e-07	2.62e-05	2.38645	ZNF480	ZNF480	up
	270	ENSG00000218510	1.63401	3.69e-07	2.71e-05	8.30334	LINC00339	LINC00339	up
	271	ENSG00000286340	1.5829	3.92e-07	2.87e-05	6.53403			up
	272	ENSG00000230383	1.47276	3.95e-07	2.88e-05	7.96106		RPL6P19	up
	273	ENSG00000271643	1.29522	4.24e-07	3.07e-05	5.64142	PDCD6IP-DT	PDCD6IP-DT	up
	274	ENSG00000277693	1.27291	4.25e-07	3.07e-05	5.80227			up
	275	ENSG00000064989	1.67074	4.32e-07	3.12e-05	8.50369	CALCRL	CALCRL	up
	276	ENSG00000099337	0.511326	4.45e-07	3.18e-05	2.42943	KCNK6	KCNK6	up
	277	ENSG00000188938	0.323845	4.45e-07	3.18e-05	1.54298	FAM120AOS	FAM120AOS	up
	278	ENSG00000178081	1.39833	4.73e-07	3.37e-05	5.66839	ULK4P3	ULK4P3	up
	279	ENSG00000179046	1.62846	4.97e-07	3.53e-05	8.18473	TRIML2	TRIML2	up
	280	ENSG00000261423	1.67384	5.35e-07	3.79e-05	8.44704	TMEM202-AS1	TMEM202-AS1	up
	281	ENSG00000178202	0.365521	5.43e-07	3.82e-05	1.72129	POGLUT3	POGLUT3	up
	282	ENSG00000288868	1.7089	5.43e-07	3.82e-05	8.73625			up
	283	ENSG00000167220	0.587198	5.65e-07	3.96e-05	2.71311	HDHD2	HDHD2	up
	284	ENSG00000175893	0.805695	5.68e-07	3.96e-05	3.82116	ZDHHC21	ZDHHC21	up
	286	ENSG00000205339	0.328087	6.11e-07	4.24e-05	1.54473	IPO7	IPO7	up
	289	ENSG00000162623	0.423911	6.66e-07	4.57e-05	1.97548	TYW3	TYW3	up
	290	ENSG00000170954	1.55522	6.77e-07	4.63e-05	6.19027	ZNF415	ZNF415	up
	291	ENSG00000083099	0.322358	6.81e-07	4.64e-05	1.50905	LYRM2	LYRM2	up
	292	ENSG00000100575	0.397946	7.05e-07	4.79e-05	1.85241	TIMM9	TIMM9	up
	294	ENSG00000100852	0.782385	7.27e-07	4.9e-05	3.68658	ARHGAP5	ARHGAP5	up
	296	ENSG00000182111	1.38592	7.5e-07	4.99e-05	6.23553	ZNF716	ZNF716	up
	297	ENSG00000250682	0.952784	7.47e-07	4.99e-05	4.49904	LINC00491	LINC00491	up
	298	ENSG00000265681	0.373804	7.44e-07	4.99e-05	1.73648	RPL17	RPL17	up
	299	ENSG00000244921	1.05898	7.58e-07	5.01e-05	4.42446	MTCYBP18	MTCYBP18	up
	300	ENSG00000273226	1.80005	7.58e-07	5.01e-05	9.1458			up
	301	ENSG00000128923	0.613563	7.68e-07	5.06e-05	2.85994	MINDY2	MINDY2	up
	302	ENSG00000122417	0.859499	7.91e-07	5.19e-05	4.06879	ODF2L	ODF2L	up
	303	ENSG00000272293	1.312	7.93e-07	5.19e-05	5.80001			up
	304	ENSG00000251604	1.69799	8.07e-07	5.26e-05	8.49616	LINC01385	LINC01385	up
	305	ENSG00000237575	1.45799	8.1e-07	5.27e-05	6.78694	PYY2	PYY2	up
	306	ENSG00000243701	1.10737	8.13e-07	5.27e-05	5.07995	DUBR	DUBR	up
	307	ENSG00000249348	1.59734	8.56e-07	5.53e-05	7.73908	UGDH-AS1	UGDH-AS1	up
	308	ENSG00000250920	1.21702	8.65e-07	5.56e-05	4.99964			up
	310	ENSG00000161298	0.611446	8.91e-07	5.7e-05	2.80181	ZNF382	ZNF382	up
	311	ENSG00000145734	0.433194	9.27e-07	5.89e-05	1.99142	BDP1	BDP1	up
	313	ENSG00000226419	0.372316	9.43e-07	5.97e-05	1.71248	SLC16A1-AS1	SLC16A1-AS1	up
	314	ENSG00000249413	1.60397	9.61e-07	6.07e-05	7.70225			up
	315	ENSG00000210154	0.810244	9.71e-07	6.11e-05	3.75012	MT-TD	MT-TD	up
	316	ENSG00000143162	0.364667	9.85e-07	6.16e-05	1.67285	CREG1	CREG1	up
	317	ENSG00000210140	0.672058	9.86e-07	6.16e-05	3.07723	MT-TC	MT-TC	up
	318	ENSG00000288930	0.818523	9.88e-07	6.16e-05	3.67177		LOC101928768	up
	319	ENSG00000173166	1.59533	9.97e-07	6.2e-05	7.68046	RAPH1	RAPH1	up
	320	ENSG00000107295	1.61143	1e-06	6.22e-05	7.76249	SH3GL2	SH3GL2	up
	321	ENSG00000242242	1.61554	1.02e-06	6.28e-05	7.75804	NECTIN3-AS1	NECTIN3-AS1	up
	322	ENSG00000163235	1.67019	1.07e-06	6.58e-05	8.14243	TGFA	TGFA	up
	323	ENSG00000257103	0.236278	1.09e-06	6.66e-05	1.0965	LSM14A	LSM14A	up
	324	ENSG00000148680	1.20861	1.09e-06	6.7e-05	5.17011	HTR7	HTR7	up
	326	ENSG00000081386	1.25424	1.13e-06	6.87e-05	5.83112	ZNF510	ZNF510	up
	327	ENSG00000151914	0.403513	1.13e-06	6.87e-05	1.84273	DST	DST	up
	328	ENSG00000145808	1.30426	1.15e-06	6.93e-05	5.3481	ADAMTS19	ADAMTS19	up
	329	ENSG00000271200	1.67942	1.15e-06	6.95e-05	8.19772	PATJ-DT	PATJ-DT	up
	330	ENSG00000235493	1.15892	1.19e-06	7.15e-05	5.12388	LINC01967	LINC01967	up
	331	ENSG00000106034	0.940637	1.2e-06	7.17e-05	4.3447	CPED1	CPED1	up
	332	ENSG00000185515	0.323978	1.21e-06	7.21e-05	1.48117	BRCC3	BRCC3	up
	333	ENSG00000197713	0.317866	1.25e-06	7.42e-05	1.44784	RPE	RPE	up
	334	ENSG00000101745	0.410863	1.25e-06	7.43e-05	1.85677	ANKRD12	ANKRD12	up
	335	ENSG00000106536	0.483018	1.26e-06	7.44e-05	2.1729	POU6F2	POU6F2	up
	336	ENSG00000111615	0.243851	1.27e-06	7.51e-05	1.12144	KRR1	KRR1	up
	337	ENSG00000261572	1.33916	1.29e-06	7.58e-05	5.03895			up
	338	ENSG00000280623	0.914705	1.29e-06	7.58e-05	3.98109	PCAT14	PCAT14	up
	340	ENSG00000188342	0.180705	1.31e-06	7.64e-05	0.841136	GTF2F2	GTF2F2	unchanged
	342	ENSG00000134757	1.66934	1.34e-06	7.76e-05	8.03636	DSG3	DSG3	up
	343	ENSG00000200913	0.792365	1.37e-06	7.95e-05	3.54105	SNORD46	SNORD46	up
	344	ENSG00000149084	0.412156	1.53e-06	8.8e-05	1.85234	HSD17B12	HSD17B12	up
	346	ENSG00000130962	1.12826	1.58e-06	9.03e-05	5.02918	PRRG1	PRRG1	up
	347	ENSG00000114107	0.358294	1.64e-06	9.34e-05	1.60688	CEP70	CEP70	up
	348	ENSG00000275764	0.965301	1.69e-06	9.61e-05	4.34093			up
	349	ENSG00000093167	0.356473	1.7e-06	9.65e-05	1.59415	LRRFIP2	LRRFIP2	up
	350	ENSG00000253250	0.46813	1.76e-06	1e-04	2.07883	C8orf88	C8orf88	up
	351	ENSG00000288764	1.56344	1.8e-06	0.000101789	7.20799			up
	352	ENSG00000270820	1.68988	1.81e-06	0.00010195	8.04913	USP34-DT	USP34-DT	up
	353	ENSG00000278845	0.257761	1.82e-06	0.000102396	1.16249	MRPL45	MRPL45	up
	354	ENSG00000210144	0.582087	1.87e-06	0.000104808	2.58364	MT-TY	MT-TY	up
	355	ENSG00000249910	1.46154	1.89e-06	0.00010567	5.30138	TRIM51CP	TRIM51CP	up
	356	ENSG00000031691	0.389199	1.94e-06	0.000108099	1.72811	CENPQ	CENPQ	up
	357	ENSG00000244627	0.623447	1.96e-06	0.000109029	2.74721	TPTEP2	TPTEP2	up
	358	ENSG00000100815	0.36328	1.99e-06	0.000110118	1.61248	TRIP11	TRIP11	up
	359	ENSG00000226057	1.1115	2.01e-06	0.000110532	4.64397	PHF2P2	PHF2P2	up
	360	ENSG00000235726	1.70716	2.01e-06	0.000110532	6.82238			up
	361	ENSG00000289076	1.64572	2.01e-06	0.000110532	7.72686			up
	362	ENSG00000036530	2.08532	2.06e-06	0.000112521	10.1276	CYP46A1	CYP46A1	up
	363	ENSG00000135968	0.365769	2.06e-06	0.000112521	1.61934	GCC2	GCC2	up
	364	ENSG00000100109	0.963022	2.07e-06	0.000112901	4.17353	TFIP11	TFIP11	up
	365	ENSG00000215790	1.46715	2.11e-06	0.000114832	5.26359	SLC35E2A	SLC35E2A	up
	366	ENSG00000166049	1.68715	2.17e-06	0.000117805	7.99456	PASD1	PASD1	up
	368	ENSG00000197498	0.184584	2.24e-06	0.000120145	0.839542	RPF2	RPF2	unchanged
	369	ENSG00000213057	1.54997	2.23e-06	0.000120145	5.78408	C1orf220	C1orf220	up
	370	ENSG00000274460	1.65554	2.25e-06	0.000120324	7.77205			up
	371	ENSG00000147654	0.291099	2.26e-06	0.00012042	1.29399	EBAG9	EBAG9	up
	372	ENSG00000153015	0.261709	2.26e-06	0.00012042	1.16718	CWC27	CWC27	up
	373	ENSG00000241061	0.61695	2.34e-06	0.000124398	2.71867	RPL5P1	RPL5P1	up
	375	ENSG00000163001	0.271669	2.4e-06	0.000126646	1.20838	CFAP36	CFAP36	up
	376	ENSG00000225630	0.650947	2.4e-06	0.000126646	2.8537	MTND2P28	MTND2P28	up
	378	ENSG00000174842	0.435787	2.43e-06	0.000127702	1.90442	GLMN	GLMN	up
	379	ENSG00000163328	0.489304	2.45e-06	0.000127895	2.12819	GPR155	GPR155	up
	380	ENSG00000237973	1.87291	2.45e-06	0.000127895	9.74186	MTCO1P12	MTCO1P12	up
	381	ENSG00000118412	0.533066	2.47e-06	0.000128758	2.33253	CASP8AP2	CASP8AP2	up
	382	ENSG00000133112	0.52259	2.49e-06	0.000129165	2.28959	TPT1	TPT1	up
	383	ENSG00000288075	0.810937	2.5e-06	0.000129607	3.54035			up
	384	ENSG00000247199	1.05182	2.56e-06	0.000132208	4.67167	FBXO38-DT	FBXO38-DT	up
	385	ENSG00000158234	0.275438	2.59e-06	0.000133266	1.21779	FAIM	FAIM	up
	386	ENSG00000240673	1.51835	2.59e-06	0.000133266	6.52442			up
	387	ENSG00000227008	0.561566	2.62e-06	0.000134154	2.44537	RPS24P19	RPS24P19	up
	388	ENSG00000196912	0.830681	2.69e-06	0.00013738	3.61707	ANKRD36B	ANKRD36B	up
	389	ENSG00000187109	0.476409	2.72e-06	0.000138582	2.08334	NAP1L1	NAP1L1	up
	391	ENSG00000171530	0.315771	2.81e-06	0.000142382	1.38758	TBCA	TBCA	up
	393	ENSG00000091844	0.811069	2.98e-06	0.000150388	3.55628	RGS17	RGS17	up
	394	ENSG00000229267	1.25969	3.01e-06	0.000151336	5.5533	SNHG31	SNHG31	up
	395	ENSG00000216775	0.462665	3.02e-06	0.000151413	1.99808		LOC730101	up
	398	ENSG00000187742	0.271763	3.08e-06	0.000153564	1.19385	SECISBP2	SECISBP2	up
	399	ENSG00000113712	0.292214	3.1e-06	0.000153735	1.27976	CSNK1A1	CSNK1A1	up
	400	ENSG00000287042	1.33806	3.1e-06	0.000153735	5.33404			up
	401	ENSG00000234009	0.607374	3.11e-06	0.000153865	2.61674	RPL5P34	RPL5P34	up
	402	ENSG00000283900	1.76411	3.13e-06	0.00015443	8.23763	TPTEP2-CSNK1E	TPTEP2-CSNK1E	up
	403	ENSG00000108691	0.829086	3.14e-06	0.00015446	3.37199	CCL2	CCL2	up
	404	ENSG00000240225	0.503351	3.24e-06	0.000159237	2.15985	ZNF542P	ZNF542P	up
	405	ENSG00000237505	1.43746	3.27e-06	0.000160244	5.84529	PKN2-AS1	PKN2-AS1	up
	406	ENSG00000224897	1.88033	3.31e-06	0.000161682	9.02348	POT1-AS1	POT1-AS1	up
	407	ENSG00000166012	0.433116	3.36e-06	0.000163727	1.87467	TAF1D	TAF1D	up
	408	ENSG00000026103	1.11098	3.44e-06	0.000166928	4.61223	FAS	FAS	up
	409	ENSG00000138768	0.426904	3.44e-06	0.000166928	1.83557	USO1	USO1	up
	410	ENSG00000205707	0.385456	3.46e-06	0.000167505	1.6607	ETFRF1	ETFRF1	up
	411	ENSG00000186439	1.27091	3.51e-06	0.000169314	5.60197	TRDN	TRDN	up
	412	ENSG00000035928	0.38209	3.65e-06	0.000175852	1.64622	RFC1	RFC1	up
	414	ENSG00000182632	0.968573	3.74e-06	0.000179206	4.10031	CCNYL2	CCNYL2	up
	415	ENSG00000244052	0.635378	3.75e-06	0.000179206	2.67661	RPL5P24	RPL5P24	up
	416	ENSG00000286162	1.15457	3.95e-06	0.000188061	4.28121			up
	417	ENSG00000175287	1.54823	4.01e-06	0.00019049	6.82261	PHYHD1	PHYHD1	up
	418	ENSG00000258081	1.26137	4.02e-06	0.00019049	5.13388			up
	419	ENSG00000156508	0.365931	4.21e-06	0.000198781	1.56633	EEF1A1	EEF1A1	up
	421	ENSG00000065150	0.306873	4.27e-06	0.000200944	1.32136	IPO5	IPO5	up
	422	ENSG00000164237	0.420395	4.28e-06	0.000201153	1.79284	CMBL	CMBL	up
	423	ENSG00000175544	1.36906	4.32e-06	0.000202396	6.02339	CABP4	CABP4	up
	425	ENSG00000117533	0.589597	4.51e-06	0.000209764	2.48977	VAMP4	VAMP4	up
	426	ENSG00000179603	1.62672	4.5e-06	0.000209764	7.29831	GRM8	GRM8	up
	427	ENSG00000121897	0.322171	4.53e-06	0.000210391	1.37937	LIAS	LIAS	up
	428	ENSG00000151789	1.78147	4.68e-06	0.00021696	6.88907	ZNF385D	ZNF385D	up
	429	ENSG00000183578	1.8467	4.75e-06	0.000219637	8.6934	TNFAIP8L3	TNFAIP8L3	up
	431	ENSG00000228126	1.51208	4.91e-06	0.000226205	6.49774	FALEC	FALEC	up
	432	ENSG00000123106	0.433854	4.97e-06	0.000228112	1.82885	CCDC91	CCDC91	up
	433	ENSG00000229089	0.553144	4.99e-06	0.000228301	2.30891	ANKRD20A8P	ANKRD20A8P	up
	434	ENSG00000164182	0.455595	5.01e-06	0.000228791	1.9243	NDUFAF2	NDUFAF2	up
	435	ENSG00000213253	1.10429	5.06e-06	0.000230844	4.788	RPL12P42	RPL12P42	up
	436	ENSG00000279539	1.3647	5.08e-06	0.000230871	5.60715			up
	438	ENSG00000230359	1.05833	5.19e-06	0.000234733	4.10597	TPI1P2	TPI1P2	up
	439	ENSG00000102189	0.373769	5.4e-06	0.000243914	1.57702	EEA1	EEA1	up
	440	ENSG00000163608	0.334459	5.45e-06	0.0002454	1.41662	NEPRO	NEPRO	up
	442	ENSG00000214336	1.05789	5.53e-06	0.000247974	4.34272	FOXI3	FOXI3	up
	443	ENSG00000252316	1.71844	5.54e-06	0.000247974	7.7722	RNY4	RNY4	up
	444	ENSG00000184261	1.8507	5.62e-06	0.000250804	8.40865	KCNK12	KCNK12	up
	446	ENSG00000187569	1.53205	5.83e-06	0.000259162	6.63653	DPPA3	DPPA3	up
	447	ENSG00000163428	0.434416	6e-06	0.000265903	1.81658	LRRC58	LRRC58	up
	448	ENSG00000289055	1.54413	6.23e-06	0.000275832	6.62647			up
	449	ENSG00000259826	1.62467	6.29e-06	0.000277847	7.12844	CDK13-DT	CDK13-DT	up
	450	ENSG00000286652	1.63797	6.4e-06	0.000281909	7.20388			up
	451	ENSG00000257376	1.04433	6.45e-06	0.000283356	3.9923			up
	452	ENSG00000139292	1.73621	6.53e-06	0.000286507	7.8005	LGR5	LGR5	up
	453	ENSG00000117620	0.461664	6.7e-06	0.0002934	1.9143	SLC35A3	SLC35A3	up
	454	ENSG00000176731	0.277554	6.78e-06	0.000296217	1.17116	RBIS	RBIS	up
	455	ENSG00000171204	0.420044	6.87e-06	0.000298925	1.74855	TMEM126B	TMEM126B	up
	456	ENSG00000204789	0.743499	6.88e-06	0.000298925	3.09274	ZNF204P	ZNF204P	up
	458	ENSG00000223653	1.61806	6.93e-06	0.00029987	7.04443			up
	459	ENSG00000202515	1.33782	7.05e-06	0.00030443	4.58173	VTRNA1-3	VTRNA1-3	up
	460	ENSG00000135766	1.7608	7.19e-06	0.000309365	7.91738	EGLN1	EGLN1	up
	461	ENSG00000260317	1.96733	7.19e-06	0.000309365	9.00255			up
	463	ENSG00000169967	0.525567	7.44e-06	0.000318197	2.16375	MAP3K2	MAP3K2	up
	464	ENSG00000183111	1.87355	7.45e-06	0.000318197	8.49486	ARHGEF37	ARHGEF37	up
	465	ENSG00000128253	1.44772	7.51e-06	0.000320213	6.05444	RFPL2	RFPL2	up
	466	ENSG00000167232	0.582788	7.54e-06	0.000320651	2.40153	ZNF91	ZNF91	up
	467	ENSG00000123684	0.534329	7.63e-06	0.000324038	2.20043	LPGAT1	LPGAT1	up
	468	ENSG00000261420	1.59424	7.76e-06	0.000328223	6.8317	MPC1-DT	MPC1-DT	up
	469	ENSG00000268119	1.18941	7.75e-06	0.000328223	4.76574		LOC105372321	up
	470	ENSG00000129116	0.377929	7.87e-06	0.000331953	1.5634	PALLD	PALLD	up
	471	ENSG00000289558	1.59507	7.91e-06	0.000332902	6.84347			up
	472	ENSG00000215457	1.18773	7.95e-06	0.000334073	4.83176	RPS8P3	RPS8P3	up
	473	ENSG00000198162	0.434965	7.98e-06	0.000334283	1.7887	MAN1A2	MAN1A2	up
	474	ENSG00000038219	0.443782	8.02e-06	0.000334859	1.82445	BOD1L1	BOD1L1	up
	475	ENSG00000092020	0.253654	8.01e-06	0.000334859	1.06502	PPP2R3C	PPP2R3C	up
	476	ENSG00000068796	0.376216	8.06e-06	0.000335382	1.55341	KIF2A	KIF2A	up
	478	ENSG00000186479	1.87565	8.11e-06	0.000336251	8.43293	RGS7BP	RGS7BP	up
	479	ENSG00000261824	0.451282	8.22e-06	0.000340191	1.8531	LINC00662	LINC00662	up
	480	ENSG00000125868	0.197878	8.33e-06	0.000344258	0.842857	DSTN	DSTN	unchanged
	481	ENSG00000166181	0.301048	8.45e-06	0.000348243	1.24962	API5	API5	up
	482	ENSG00000101951	1.69925	8.55e-06	0.000351614	6.20986	PAGE4	PAGE4	up
	483	ENSG00000146263	0.460909	8.61e-06	0.000353372	1.8894	MMS22L	MMS22L	up
	485	ENSG00000272791	1.95016	8.75e-06	0.000357586	8.85702			up
	486	ENSG00000197372	0.455589	8.8e-06	0.000357872	1.85243	ZNF675	ZNF675	up
	487	ENSG00000205133	0.591249	8.8e-06	0.000357872	2.41424	TRIQK	TRIQK	up
	488	ENSG00000226803	1.717	8.81e-06	0.000357872	7.51022	ZNF451-AS1	ZNF451-AS1	up
	489	ENSG00000229015	0.274974	9.06e-06	0.000367192	1.14273		LOC100506790	up
	490	ENSG00000286362	1.55264	9.11e-06	0.000368729	5.35638			up
	491	ENSG00000085760	0.254653	9.21e-06	0.000371977	1.0613	MTIF2	MTIF2	up
	492	ENSG00000147533	0.840123	9.52e-06	0.000383625	3.42745	GOLGA7	GOLGA7	up
	493	ENSG00000257800	2.04019	9.65e-06	0.000388034	9.31971	FNBP1P1	FNBP1P1	up
	494	ENSG00000163785	0.493	9.81e-06	0.000393885	2.00205	RYK	RYK	up
	495	ENSG00000115355	0.440611	9.95e-06	0.000397972	1.79036	CCDC88A	CCDC88A	up
	496	ENSG00000170703	2.00271	9.96e-06	0.000397972	9.11263	TTLL6	TTLL6	up
	497	ENSG00000168772	0.442258	1.01e-05	0.000403097	1.79054	CXXC4	CXXC4	up
	498	ENSG00000257497	1.82447	1.02e-05	0.000406568	8.08815			up
	499	ENSG00000121211	0.655255	1.03e-05	0.000407562	2.65546	MND1	MND1	up
	500	ENSG00000281189	1.83455	1.04e-05	0.000412829	8.12316	GHET1	GHET1	up
	501	ENSG00000278972	1.7142	1.06e-05	0.000420466	7.41578			up
	502	ENSG00000177425	0.290669	1.07e-05	0.000421032	1.19309	PAWR	PAWR	up
	503	ENSG00000227355	1.31595	1.07e-05	0.000421412	5.594			up
	504	ENSG00000272247	1.6608	1.09e-05	0.000428563	7.09244			up
	505	ENSG00000148835	0.348526	1.1e-05	0.000431651	1.4179	TAF5	TAF5	up
	506	ENSG00000153291	1.82813	1.1e-05	0.000431651	8.08559	SLC25A27	SLC25A27	up
	507	ENSG00000111670	0.359424	1.11e-05	0.000432121	1.46021	GNPTAB	GNPTAB	up
	508	ENSG00000104164	0.45672	1.13e-05	0.000440704	1.84204	BLOC1S6	BLOC1S6	up
	509	ENSG00000131944	0.583256	1.14e-05	0.000442307	2.34304	FAAP24	FAAP24	up
	510	ENSG00000169895	0.257931	1.14e-05	0.000442307	1.06127	SYAP1	SYAP1	up
	512	ENSG00000155849	1.69074	1.15e-05	0.000443403	6.28887	ELMO1	ELMO1	up
	513	ENSG00000250568	1.01888	1.15e-05	0.000446222	4.0608			up
	514	ENSG00000196693	0.474673	1.17e-05	0.000450052	1.90895	ZNF33B	ZNF33B	up
	515	ENSG00000246596	1.91186	1.17e-05	0.000452311	8.55325			up
	516	ENSG00000285602	1.67813	1.2e-05	0.000461433	7.16724			up
	518	ENSG00000198478	0.795591	1.23e-05	0.000469535	3.19251	SH3BGRL2	SH3BGRL2	up
	519	ENSG00000105072	1.3634	1.24e-05	0.000473936	5.0631	C19orf44	C19orf44	up
	521	ENSG00000163322	0.769429	1.27e-05	0.000484166	3.09192	ABRAXAS1	ABRAXAS1	up
	522	ENSG00000272663	2.07807	1.28e-05	0.000487319	9.49775	PPP1R21-DT	PPP1R21-DT	up
	523	ENSG00000169019	0.405137	1.29e-05	0.000488589	1.62599	COMMD8	COMMD8	up
	524	ENSG00000253764	1.91071	1.29e-05	0.000488589	8.45085	KBTBD11-AS1	KBTBD11-AS1	up
	525	ENSG00000167842	0.61411	1.31e-05	0.000495289	2.43788	MIS12	MIS12	up
	527	ENSG00000138430	0.266099	1.35e-05	0.00050679	1.08503	OLA1	OLA1	up
	528	ENSG00000172671	1.20231	1.35e-05	0.00050679	4.80959	ZFAND4	ZFAND4	up
	529	ENSG00000167766	0.561738	1.37e-05	0.000511744	2.22382	ZNF83	ZNF83	up
	530	ENSG00000254004	0.685577	1.37e-05	0.000511855	2.72918	ZNF260	ZNF260	up
	531	ENSG00000206828	1.62492	1.37e-05	0.000513208	6.80595	RNVU1-30	RNVU1-30	up
	533	ENSG00000110768	0.314752	1.4e-05	0.000519498	1.26901	GTF2H1	GTF2H1	up
	534	ENSG00000111647	0.367571	1.41e-05	0.000521123	1.47077	UHRF1BP1L	UHRF1BP1L	up
	535	ENSG00000133773	0.429626	1.41e-05	0.000521123	1.71428	CCDC59	CCDC59	up
	537	ENSG00000278530	1.42877	1.43e-05	0.000526142	5.59436	CHMP1B2P	CHMP1B2P	up
	539	ENSG00000234782	0.752943	1.48e-05	0.000544088	2.96212	TPT1P9	TPT1P9	up
	540	ENSG00000242616	0.385418	1.49e-05	0.000545764	1.53338	GNG10	GNG10	up
	541	ENSG00000138785	0.328678	1.49e-05	0.000547857	1.31672	INTS12	INTS12	up
	543	ENSG00000086300	0.356996	1.52e-05	0.000552993	1.42282	SNX10	SNX10	up
	544	ENSG00000189403	0.191974	1.52e-05	0.000552993	0.791486	HMGB1	HMGB1	unchanged
	545	ENSG00000227470	2.05437	1.51e-05	0.000552993	9.05429	RPL39P16	RPL39P16	up
	546	ENSG00000185641	0.488518	1.54e-05	0.000560963	1.93053			up
	548	ENSG00000230207	0.376132	1.62e-05	0.000586593	1.49142	RPL4P5	RPL4P5	up
	549	ENSG00000269858	1.5413	1.62e-05	0.000586593	6.21031	EGLN2	EGLN2	up
	551	ENSG00000185267	1.79437	1.69e-05	0.000606772	7.68502	CDNF	CDNF	up
	552	ENSG00000198695	0.492799	1.69e-05	0.000606772	1.93625	MT-ND6	ND6	up
	553	ENSG00000286408	0.620304	1.69e-05	0.000607368	2.4239			up
	555	ENSG00000272518	2.241	1.76e-05	0.000627115	8.77929			up
	556	ENSG00000176542	0.377196	1.76e-05	0.00062847	1.48922	USF3	USF3	up
	557	ENSG00000224689	1.85811	1.77e-05	0.000628585	8.03449	ZNF812P	ZNF812P	up
	558	ENSG00000233571	2.04237	1.77e-05	0.000630505	9.0634			up
	559	ENSG00000243777	0.602707	1.82e-05	0.000643523	2.3193		RPS6P17	up
	560	ENSG00000274605	0.413842	1.82e-05	0.000643523	1.62499	PCCA-DT	PCCA-DT	up
	561	ENSG00000230170	0.857407	1.83e-05	0.000644981	3.28143	HNRNPA1P28	HNRNPA1P28	up
	564	ENSG00000156467	0.321366	1.88e-05	0.000659517	1.27601	UQCRB	UQCRB	up
	565	ENSG00000005436	0.423364	1.93e-05	0.000675846	1.6607	GCFC2	GCFC2	up
	566	ENSG00000106804	1.14997	1.97e-05	0.000691701	4.29519	C5	C5	up
	569	ENSG00000075407	0.572487	2.07e-05	0.000722227	2.2157	ZNF37A	ZNF37A	up
	571	ENSG00000204118	1.83217	2.12e-05	0.000733858	7.76526	NAP1L6P	NAP1L6P	up
	572	ENSG00000242474	1.75976	2.12e-05	0.000733858	6.21076			up
	573	ENSG00000105610	1.80641	2.14e-05	0.000740319	7.64557	KLF1	KLF1	up
	574	ENSG00000109171	0.30339	2.16e-05	0.000745675	1.19595	SLAIN2	SLAIN2	up
	576	ENSG00000198301	0.315533	2.24e-05	0.000770101	1.23844	SDAD1	SDAD1	up
	577	ENSG00000147679	0.288381	2.25e-05	0.000771677	1.13647	UTP23	UTP23	up
	580	ENSG00000242882	0.829303	2.31e-05	0.000790758	3.08738	RPL5P11	RPL5P11	up
	584	ENSG00000214182	0.255124	2.4e-05	0.000814837	1.00823	PTMAP5	PTMAP5	up
	585	ENSG00000152380	0.9642	2.47e-05	0.0008384	3.6136	FAM151B	FAM151B	up
	586	ENSG00000225087	1.71417	2.54e-05	0.000858638	6.96647			up
	587	ENSG00000273045	1.60388	2.56e-05	0.000866167	6.39757	C2orf15	C2orf15	up
	588	ENSG00000204427	1.53017	2.59e-05	0.000873275	5.93987	ABHD16A	ABHD16A	up
	589	ENSG00000267871	1.65186	2.64e-05	0.000889664	6.64442	ZNF460-AS1	ZNF460-AS1	up
	590	ENSG00000223509	1.60715	2.66e-05	0.000892544	6.0087			up
	591	ENSG00000255008	1.55998	2.69e-05	0.000900836	6.11725	LINC02739	LINC02739	up
	592	ENSG00000050628	0.322814	2.69e-05	0.000902148	1.25055	PTGER3	PTGER3	up
	593	ENSG00000237668	0.884118	2.71e-05	0.000906633	3.31906	RPS15AP38	RPS15AP38	up
	595	ENSG00000168259	0.245275	2.77e-05	0.000923619	0.964733	DNAJC7	DNAJC7	unchanged
	596	ENSG00000289499	1.62559	2.78e-05	0.000926221	6.48412			up
	598	ENSG00000248092	0.339516	2.8e-05	0.000928404	1.30973	NNT-AS1	NNT-AS1	up
	599	ENSG00000120742	0.227125	2.82e-05	0.000933798	0.897093	SERP1	SERP1	unchanged
	600	ENSG00000144395	0.890834	2.86e-05	0.000942764	3.39229	CCDC150	CCDC150	up
	601	ENSG00000183304	1.81202	2.86e-05	0.000942764	6.32972	FAM9A	FAM9A	up
	602	ENSG00000051825	0.464071	2.94e-05	0.000967057	1.75935	MPHOSPH9	MPHOSPH9	up
	604	ENSG00000235552	0.560301	3.01e-05	0.000987263	2.11405	RPL6P27	RPL6P27	up
	606	ENSG00000213881	0.722219	3.04e-05	0.000994421	2.67627	NPM1P6	NPM1P6	up
	607	ENSG00000228474	0.254893	3.06e-05	0.000997654	0.998018	OST4	OST4	unchanged
	608	ENSG00000238058	1.97287	3.06e-05	0.000997654	8.3608			up
	610	ENSG00000127914	0.345336	3.11e-05	0.00101179	1.32227	AKAP9	AKAP9	up
	611	ENSG00000138592	0.607206	3.14e-05	0.00101693	2.28145	USP8	USP8	up
	612	ENSG00000166262	0.542331	3.14e-05	0.00101693	2.03155	FAM227B	FAM227B	up
	614	ENSG00000274825	1.97974	3.24e-05	0.00104571	8.37046			up
	615	ENSG00000066777	0.478635	3.25e-05	0.00104742	1.80283	ARFGEF1	ARFGEF1	up
	616	ENSG00000263843	1.80499	3.3e-05	0.00106075	7.31447	MIF4GD-DT	MIF4GD-DT	up
	617	ENSG00000106554	0.303277	3.33e-05	0.00106921	1.16407	CHCHD3	CHCHD3	up
	619	ENSG00000137561	2.0018	3.4e-05	0.0010897	8.50295	TTPA	TTPA	up
	620	ENSG00000288009	1.89376	3.42e-05	0.00109241	7.82541		LOC101929004	up
	622	ENSG00000263465	0.315472	3.47e-05	0.00110694	1.2058	SRSF8	SRSF8	up
	624	ENSG00000273382	1.10562	3.51e-05	0.00111535	4.11179	TMEM167B-DT	TMEM167B-DT	up
	626	ENSG00000114757	1.15756	3.6e-05	0.00113887	4.22008	PEX5L	PEX5L	up
	627	ENSG00000272501	1.03055	3.62e-05	0.00114565	3.83552			up
	628	ENSG00000108788	0.247373	3.76e-05	0.00118767	0.955248	MLX	MLX	unchanged
	629	ENSG00000287390	1.95412	3.77e-05	0.00118852	8.06497			up
	630	ENSG00000254547	1.45705	3.8e-05	0.00119597	5.38579			up
	631	ENSG00000196584	0.421552	3.83e-05	0.0012027	1.57762	XRCC2	XRCC2	up
	635	ENSG00000197860	0.605403	4.11e-05	0.00128427	2.23188	SGTB	SGTB	up
	637	ENSG00000258636	1.31663	4.14e-05	0.0012872	4.96087	LRFN5-DT	LRFN5-DT	up
	638	ENSG00000258733	2.33557	4.13e-05	0.0012872	9.7834	LINC02328	LINC02328	up
	639	ENSG00000082153	0.24816	4.16e-05	0.00128977	0.95269	BZW1	BZW1	unchanged
	640	ENSG00000174780	0.313013	4.17e-05	0.0012914	1.18351	SRP72	SRP72	up
	642	ENSG00000133863	0.439536	4.24e-05	0.00130904	1.63096	TEX15	TEX15	up
	643	ENSG00000261121	2.04874	4.25e-05	0.00131164	8.58958	LINC02473	LINC02473	up
	644	ENSG00000213432	0.938608	4.27e-05	0.00131382	3.48516	RPL17P34	RPL17P34	up
	645	ENSG00000243504	0.701151	4.29e-05	0.00131798	2.55548	RPS23P1	RPS23P1	up
	647	ENSG00000131969	2.25154	4.33e-05	0.00132763	9.20577	ABHD12B	ABHD12B	up
	648	ENSG00000225224	0.483396	4.38e-05	0.0013409	1.78927	RPS27AP12	RPS27AP12	up
	649	ENSG00000182050	1.47041	4.48e-05	0.00136649	5.09584	MGAT4C	MGAT4C	up
	650	ENSG00000234072	1.56262	4.48e-05	0.00136649	4.84986			up
	652	ENSG00000113522	0.529834	4.68e-05	0.00142158	1.93572	RAD50	RAD50	up
	653	ENSG00000270800	0.707609	4.74e-05	0.00143904	2.51802	RPS10-NUDT3	RPS10-NUDT3	up
	654	ENSG00000137154	0.330658	4.76e-05	0.00144333	1.23532	RPS6	RPS6	up
	655	ENSG00000222030	1.46831	4.8e-05	0.00145212	5.23224	LINC01793	LINC01793	up
	656	ENSG00000244265	1.42664	4.8e-05	0.00145212	5.01029	SIAH2-AS1	SIAH2-AS1	up
	659	ENSG00000286819	1.75062	4.97e-05	0.00149422	6.85448			up
	660	ENSG00000210082	0.667264	5.02e-05	0.00150782	2.42709	MT-RNR2	MT-RNR2	up
	662	ENSG00000240423	2.20377	5.18e-05	0.00155101	8.80454	LINC00636	LINC00636	up
	663	ENSG00000243071	2.05635	5.22e-05	0.00156202	8.75151		RPL21P98	up
	665	ENSG00000277597	1.28435	5.27e-05	0.00157253	4.80245			up
	666	ENSG00000189180	0.505353	5.34e-05	0.00159064	1.82894	ZNF33A	ZNF33A	up
	667	ENSG00000105185	0.266387	5.42e-05	0.0016111	1.00052	PDCD5	PDCD5	up
	668	ENSG00000267519	0.729156	5.47e-05	0.00162432	2.60065	MIR23AHG	MIR23AHG	up
	670	ENSG00000219626	1.02925	5.56e-05	0.00164462	3.74567	FAM228B	FAM228B	up
	671	ENSG00000241511	0.660938	5.57e-05	0.00164462	2.35184	RPS15AP24	RPS15AP24	up
	672	ENSG00000212907	0.539319	5.6e-05	0.00165099	1.95193	MT-ND4L	ND4L	up
	674	ENSG00000157259	0.345555	5.65e-05	0.00166296	1.27109	GATAD1	GATAD1	up
	675	ENSG00000183935	1.6928	5.67e-05	0.00166524	5.3986	HTR7P1	HTR7P1	up
	676	ENSG00000165338	0.845893	5.77e-05	0.00169218	3.04934	HECTD2	HECTD2	up
	678	ENSG00000243592	1.58442	5.81e-05	0.00169952	6.05715	RPL17P22	RPL17P22	up
	679	ENSG00000224157	1.81881	5.9e-05	0.00172235	7.11346	HCG14	HCG14	up
	681	ENSG00000288945	2.76905	5.96e-05	0.00173591	13.2085			up
	683	ENSG00000290008	1.68287	6.04e-05	0.00175454	6.38205	NA	NA	up
	685	ENSG00000215533	1.8735	6.06e-05	0.00175471	7.38156	LINC00189	LINC00189	up
	686	ENSG00000110315	0.332217	6.08e-05	0.00175643	1.22029	RNF141	RNF141	up
	688	ENSG00000163577	0.539355	6.15e-05	0.00177292	1.93404	EIF5A2	EIF5A2	up
	689	ENSG00000173988	1.93839	6.2e-05	0.00178542	7.64171	LRRC63	LRRC63	up
	691	ENSG00000261094	1.94474	6.25e-05	0.00179419	7.71705			up
	692	ENSG00000197472	0.63708	6.3e-05	0.00180449	2.27848	ZNF695	ZNF695	up
	695	ENSG00000197020	0.390786	6.41e-05	0.00182782	1.41588	ZNF100	ZNF100	up
	696	ENSG00000288879	1.44534	6.43e-05	0.00183113	4.44087			up
	699	ENSG00000232594	2.11661	6.57e-05	0.001864	7.17134			up
	702	ENSG00000146070	1.88215	6.92e-05	0.00195297	7.33578	PLA2G7	PLA2G7	up
	703	ENSG00000106610	0.470308	6.96e-05	0.00196346	1.68017	STAG3L4	STAG3L4	up
	704	ENSG00000134072	1.59425	6.98e-05	0.00196543	5.86517	CAMK1	CAMK1	up
	705	ENSG00000198042	0.257099	7.02e-05	0.00197489	0.952247	MAK16	MAK16	unchanged
	706	ENSG00000212127	2.11853	7.08e-05	0.0019878	8.45048	TAS2R14	TAS2R14	up
	708	ENSG00000285763	1.88029	7.21e-05	0.0020178	6.18198			up
	710	ENSG00000198925	1.55126	7.27e-05	0.00203097	5.59689	ATG9A	ATG9A	up
	712	ENSG00000152944	0.408532	7.34e-05	0.00204286	1.46372	MED21	MED21	up
	714	ENSG00000102317	0.243644	7.36e-05	0.00204315	0.902377	RBM3	RBM3	unchanged
	717	ENSG00000110675	0.617098	7.41e-05	0.00205335	2.17399	ELMOD1	ELMOD1	up
	718	ENSG00000255642	0.836037	7.44e-05	0.00205509	2.94515	PABPC1P4	PABPC1P4	up
	720	ENSG00000122033	0.504768	7.53e-05	0.00207013	1.78919	MTIF3	MTIF3	up
	721	ENSG00000147874	0.376574	7.53e-05	0.00207013	1.35344	HAUS6	HAUS6	up
	724	ENSG00000078237	0.566695	7.66e-05	0.00209685	1.99128	TIGAR	TIGAR	up
	725	ENSG00000232176	0.469115	7.69e-05	0.00210395	1.66452		RPS6P10	up
	726	ENSG00000111319	1.20086	7.76e-05	0.00210997	4.21819	SCNN1A	SCNN1A	up
	727	ENSG00000153006	0.345818	7.75e-05	0.00210997	1.24731	SREK1IP1	SREK1IP1	up
	728	ENSG00000153044	0.321669	7.74e-05	0.00210997	1.17481	CENPH	CENPH	up
	729	ENSG00000233937	1.78888	7.74e-05	0.00210997	5.76051	CTC-338M12.4	CTC-338M12.4	up
	733	ENSG00000275318	1.90389	7.97e-05	0.0021554	7.34708		LOC100419515	up
	736	ENSG00000187735	0.235968	8.24e-05	0.00221896	0.867299	TCEA1	TCEA1	unchanged
	737	ENSG00000136014	1.83041	8.25e-05	0.00221959	7.0083	USP44	USP44	up
	738	ENSG00000247556	0.398301	8.27e-05	0.00222285	1.41829	OIP5-AS1	OIP5-AS1	up
	739	ENSG00000115904	0.472232	8.35e-05	0.00223919	1.66215	SOS1	SOS1	up
	740	ENSG00000146859	1.75347	8.48e-05	0.00227205	6.56284	TMEM140	TMEM140	up
	741	ENSG00000289379	1.86772	8.57e-05	0.00229427	7.12852			up
	745	ENSG00000171817	1.75914	8.86e-05	0.00235067	6.55609	ZNF540	ZNF540	up
	747	ENSG00000272055	0.837719	8.85e-05	0.00235067	2.9201	RNU6-6P	RNU6-6P	up
	749	ENSG00000152078	0.696727	8.95e-05	0.00236844	2.41894	TLCD4	TLCD4	up
	750	ENSG00000184117	0.456724	8.96e-05	0.00236844	1.61132	NIPSNAP1	NIPSNAP1	up
	751	ENSG00000262202	1.85983	9.05e-05	0.00238787	6.99684			up
	752	ENSG00000166295	0.336195	9.09e-05	0.00239558	1.20108	ANAPC16	ANAPC16	up
	753	ENSG00000236330	1.01799	9.17e-05	0.00241477	3.53851	RPL5P9	RPL5P9	up
	754	ENSG00000009307	0.31128	9.19e-05	0.00241593	1.11819	CSDE1	CSDE1	up
	755	ENSG00000119979	0.365818	9.41e-05	0.00247063	1.29513	DENND10	DENND10	up
	756	ENSG00000151575	0.735141	9.44e-05	0.00247463	2.53293	TEX9	TEX9	up
	757	ENSG00000036549	0.305373	9.46e-05	0.00247643	1.09418	ZZZ3	ZZZ3	up
	758	ENSG00000264569	1.61519	9.47e-05	0.00247643	5.09313	DCXR-DT	DCXR-DT	up
	759	ENSG00000119729	0.535566	9.6e-05	0.00250419	1.85782	RHOQ	RHOQ	up
	761	ENSG00000287769	1.70704	9.61e-05	0.00250419	5.41996			up
	763	ENSG00000210117	0.883467	9.74e-05	0.0025265	3.05175	MT-TW	MT-TW	up
	764	ENSG00000225806	1.80164	9.72e-05	0.0025265	6.7391			up
	766	ENSG00000214727	1.68036	9.81e-05	0.00253594	5.24851	RPL5P35	RPL5P35	up
	767	ENSG00000220105	0.760067	9.81e-05	0.00253594	2.53844		RPS5P6	up
	768	ENSG00000253712	1.49213	9.89e-05	0.00255424	4.94712	LINC02886	LINC02886	up
	771	ENSG00000145824	0.636216	9.99e-05	0.00256967	2.19197	CXCL14	CXCL14	up
	772	ENSG00000272145	1.67394	0.00010021	0.00257353	6.06547	NFYC-AS1	NFYC-AS1	up
	774	ENSG00000241352	0.481341	0.000101563	0.00260154	1.66119		RPS6P1	up
	775	ENSG00000162244	0.331886	0.000102901	0.00263241	1.17625	RPL29	RPL29	up
	778	ENSG00000127928	0.961178	0.000104111	0.0026497	3.3253	GNGT1	GNGT1	up
	779	ENSG00000138663	0.302282	0.000104014	0.0026497	1.07827	COPS4	COPS4	up
	780	ENSG00000171405	1.73128	0.00010579	0.00268898	6.30867	XAGE5	XAGE5	up
	781	ENSG00000225616	0.506122	0.000106673	0.00270448	1.74697		RPL27P4	up
	782	ENSG00000247134	0.487849	0.00010662	0.00270448	1.68772			up
	784	ENSG00000289532	1.98031	0.000107326	0.00271488	7.58437			up
	786	ENSG00000231304	1.78223	0.000108484	0.0027364	6.55642	SGO1-AS1	SGO1-AS1	up
	787	ENSG00000229638	0.84133	0.000109381	0.00275552	2.88693	RPL4P4	RPL4P4	up
	788	ENSG00000173486	0.341338	0.000109711	0.00275681	1.20378	FKBP2	FKBP2	up
	789	ENSG00000185869	0.566234	0.000109696	0.00275681	1.93876	ZNF829	ZNF829	up
	790	ENSG00000144161	0.387409	0.0001101	0.00276309	1.35425	ZC3H8	ZC3H8	up
	791	ENSG00000260418	1.97782	0.00011079	0.0027769	7.45497			up
	792	ENSG00000176746	1.98882	0.00011115	0.0027824	7.56418	MAGEB6	MAGEB6	up
	793	ENSG00000221887	0.500484	0.000111318	0.00278309	1.71865	HMSD	HMSD	up
	795	ENSG00000260947	1.87555	0.000111631	0.00278388	6.99533			up
	797	ENSG00000078674	0.265246	0.000112872	0.00280426	0.949162	PCM1	PCM1	unchanged
	802	ENSG00000234350	1.75832	0.000115237	0.00284675	6.39		ERICH2-DT	up
	803	ENSG00000273284	1.78833	0.0001153	0.00284675	6.13298			up
	807	ENSG00000167136	0.682944	0.000117406	0.00288436	2.31529	ENDOG	ENDOG	up
	809	ENSG00000289985	1.68583	0.000118824	0.002912	6.02209	NA	NA	up
	812	ENSG00000289294	0.366318	0.000121667	0.00297065	1.27432			up
	813	ENSG00000134744	0.382336	0.0001219	0.00297267	1.32531	TUT4	TUT4	up
	815	ENSG00000229022	1.14438	0.00012242	0.00297804	3.8231		RPL6P3	up
	816	ENSG00000005020	0.390693	0.000122713	0.00297889	1.35157	SKAP2	SKAP2	up
	818	ENSG00000242208	1.01055	0.000123131	0.00298435	3.29724	RPL5P29	RPL5P29	up
	819	ENSG00000240036	0.639108	0.000125356	0.00303457	2.15273			up
	820	ENSG00000163535	0.373565	0.000126276	0.00305311	1.29579	SGO2	SGO2	up
	823	ENSG00000008311	0.53267	0.000128278	0.0030902	1.80689	AASS	AASS	up
	824	ENSG00000100196	0.599409	0.0001286	0.0030942	2.02445	KDELR3	KDELR3	up
	826	ENSG00000186665	0.249122	0.000131225	0.00314972	0.884514	C17orf58	C17orf58	unchanged
	828	ENSG00000138326	0.582953	0.000132793	0.00317966	1.96763	RPS24	RPS24	up
	829	ENSG00000242697	0.420312	0.000133598	0.00319507	1.43372	RPL5P12	RPL5P12	up
	831	ENSG00000167037	0.806804	0.000136251	0.00325067	2.6666	SGSM1	SGSM1	up
	832	ENSG00000169213	0.420903	0.000136956	0.00326356	1.43922	RAB3B	RAB3B	up
	833	ENSG00000235264	1.14606	0.000137507	0.00327277	3.5663	RPL5P28	RPL5P28	up
	834	ENSG00000112078	0.479012	0.000137726	0.00327405	1.62353	KCTD20	KCTD20	up
	836	ENSG00000228253	0.670608	0.000140158	0.00332389	2.24323	MT-ATP8	ATP8	up
	837	ENSG00000064652	0.507272	0.000140387	0.00332533	1.71116	SNX24	SNX24	up
	838	ENSG00000289311	1.68326	0.000140873	0.00333288	5.49829			up
	839	ENSG00000214429	1.83606	0.000141881	0.00335273	6.59055	CYCSP6	CYCSP6	up
	840	ENSG00000134748	0.329265	0.00014276	0.00336947	1.14253	PRPF38A	PRPF38A	up
	843	ENSG00000203650	1.63802	0.000145402	0.00341962	4.96167	LINC01285	LINC01285	up
	844	ENSG00000165813	0.586912	0.000145681	0.00342213	1.95602	CCDC186	CCDC186	up
	845	ENSG00000197415	1.64148	0.000146647	0.00344073	4.98384	VEPH1	VEPH1	up
	846	ENSG00000142541	0.311079	0.000148392	0.00347756	1.0789	RPL13A	RPL13A	up
	847	ENSG00000288949	1.99227	0.000148727	0.00348131	7.31632			up
	848	ENSG00000129204	3.20852	0.00014903	0.00348427	0.361597	USP6	USP6	unchanged
	849	ENSG00000011198	0.467808	0.000149747	0.00349692	1.57817	ABHD5	ABHD5	up
	853	ENSG00000186684	0.641941	0.000151082	0.00351155	2.11897	CYP27C1	CYP27C1	up
	855	ENSG00000135537	0.553913	0.000152968	0.00354707	1.83659	AFG1L	AFG1L	up
	856	ENSG00000237489	1.92299	0.000154535	0.00357923	5.94021	C10orf143	C10orf143	up
	860	ENSG00000213139	2.20417	0.000157938	0.00364103	6.89342	CRYGS	CRYGS	up
	862	ENSG00000172795	0.371259	0.000159623	0.00367133	1.26488	DCP2	DCP2	up
	863	ENSG00000145425	0.347808	0.000160775	0.00368945	1.18898	RPS3A	RPS3A	up
	864	ENSG00000168724	0.394039	0.000160783	0.00368945	1.33247	DNAJC21	DNAJC21	up
	865	ENSG00000160336	0.568961	0.000161235	0.00369129	1.87843	ZNF761	ZNF761	up
	866	ENSG00000248489	0.815048	0.000161138	0.00369129	2.6492	CHD1-DT	LOC100289230	up
	867	ENSG00000119547	0.674551	0.000162666	0.00371546	2.22542	ONECUT2	ONECUT2	up
	868	ENSG00000138778	0.421839	0.000162554	0.00371546	1.4235	CENPE	CENPE	up
	869	ENSG00000115267	1.872	0.000163877	0.0037345	6.74366	IFIH1	IFIH1	up
	870	ENSG00000248334	2.00356	0.000163838	0.0037345	7.35571	WHAMMP2	WHAMMP2	up
	873	ENSG00000248278	1.98455	0.00016521	0.00375195	7.24671	SUMO2P17	LOC105371814	up
	874	ENSG00000047410	0.380996	0.000166119	0.00376019	1.28966	TPR	TPR	up
	878	ENSG00000145782	0.282191	0.000166792	0.00376631	0.979143	ATG12	ATG12	unchanged
	879	ENSG00000259523	1.87822	0.000167884	0.00378666	6.71988			up
	883	ENSG00000277581	1.66222	0.000169467	0.00380837	5.72831			up
	885	ENSG00000176049	2.55781	0.000170002	0.00381234	9.73159	JAKMIP2	JAKMIP2	up
	887	ENSG00000101882	0.391046	0.000173223	0.00386748	1.31642	NKAP	NKAP	up
	888	ENSG00000230699	1.8212	0.000173144	0.00386748	6.40154			up
	891	ENSG00000172238	1.73758	0.00017398	0.0038713	5.07661	ATOH1	ATOH1	up
	892	ENSG00000170088	0.486545	0.000174695	0.00388104	1.61634	TMEM192	TMEM192	up
	893	ENSG00000196104	0.919315	0.000174809	0.00388104	2.96292	SPOCK3	SPOCK3	up
	895	ENSG00000250302	1.30693	0.000175329	0.00388747	4.15148	LINC01618	LINC01618	up
	896	ENSG00000166803	0.394384	0.000176026	0.00389062	1.32716	PCLAF	PCLAF	up
	897	ENSG00000229404	1.93008	0.000175887	0.00389062	6.90438	LINC00858	LINC00858	up
	898	ENSG00000144152	1.18183	0.00017741	0.00390913	3.81039	FBLN7	FBLN7	up
	901	ENSG00000187994	0.605247	0.000179644	0.00395296	1.99013	RINL	RINL	up
	903	ENSG00000078725	1.72429	0.000182392	0.00400216	6.01319	BRINP1	BRINP1	up
	904	ENSG00000234545	0.26983	0.000182485	0.00400216	0.931685	FAM133B	FAM133B	unchanged
	906	ENSG00000272461	2.30971	0.000183402	0.00401338	8.37667			up
	908	ENSG00000198839	0.408016	0.00018718	0.00408704	1.36251	ZNF277	ZNF277	up
	909	ENSG00000289174	1.97084	0.000187578	0.00409123	7.03149			up
	910	ENSG00000234911	1.78869	0.000187871	0.0040931	6.23053	TEX21P	TEX21P	up
	911	ENSG00000226933	1.80663	0.000188479	0.00410186	5.339	NRBF2P2	NRBF2P2	up
	912	ENSG00000060339	0.254967	0.000190169	0.0041341	0.882212	CCAR1	CCAR1	unchanged
	913	ENSG00000259969	1.71798	0.000190948	0.00414648	5.13734			up
	914	ENSG00000078304	0.256007	0.000191532	0.00415462	0.88593	PPP2R5C	PPP2R5C	unchanged
	915	ENSG00000112419	0.671532	0.000191828	0.00415648	2.18552	PHACTR2	PHACTR2	up
	917	ENSG00000245213	1.57407	0.00019302	0.00417319	4.55734		GALNT7-DT	up
	919	ENSG00000171943	0.585938	0.000197901	0.00427328	1.8992	SRGAP2C	SRGAP2C	up
	920	ENSG00000237169	1.59587	0.000198881	0.00428589	4.52479	RPL12P27	RPL12P27	up
	921	ENSG00000270959	1.99451	0.000199177	0.00428759	7.11767	LPP-AS2	LPP-AS2	up
	922	ENSG00000174950	1.97494	0.000199899	0.00429383	7.08673	CD164L2	CD164L2	up
	923	ENSG00000268696	2.03672	0.000199807	0.00429383	6.1357	ZNF723	ZNF723	up
	928	ENSG00000226435	0.778264	0.000204103	0.0043605	2.48131	ANKRD18DP	ANKRD18DP	up
	929	ENSG00000115392	0.364542	0.000207126	0.00442033	1.21651	FANCL	FANCL	up
	931	ENSG00000186854	0.488996	0.00020911	0.00445308	1.60016	TRABD2A	TRABD2A	up
	935	ENSG00000224546	0.936563	0.000214782	0.0045543	2.96044	EIF4BP3	EIF4BP3	up
	938	ENSG00000072401	0.53979	0.000218553	0.00461451	1.75069	UBE2D1	UBE2D1	up
	940	ENSG00000112305	0.356617	0.000222981	0.004703	1.18566	SMAP1	SMAP1	up
	941	ENSG00000111911	0.517709	0.000226291	0.0047659	1.67556	HINT3	HINT3	up
	945	ENSG00000224081	1.36478	0.00022755	0.00477669	4.3615	SLC44A3-AS1	SLC44A3-AS1	up
	946	ENSG00000164114	0.408388	0.000230041	0.00482114	1.34191	MAP9	MAP9	up
	948	ENSG00000268364	1.39924	0.000234002	0.0048938	4.54113	SMC5-DT	SMC5-DT	up
	949	ENSG00000105821	0.43072	0.000236114	0.00493276	1.39984	DNAJC2	DNAJC2	up
	950	ENSG00000227354	0.602888	0.000238212	0.00497136	1.92213	RBM26-AS1	RBM26-AS1	up
	951	ENSG00000120925	0.40832	0.000240797	0.00502001	1.33502	RNF170	RNF170	up
	952	ENSG00000279035	1.92213	0.000243256	0.00506595	6.66031			up
	953	ENSG00000288018	1.71225	0.000246825	0.0051349	4.77796			up
	954	ENSG00000160049	0.424674	0.000249244	0.00517435	1.38184	DFFA	DFFA	up
	955	ENSG00000214389	0.514336	0.000249083	0.00517435	1.64435	RPS3AP26	RPS3AP26	up
	956	ENSG00000229191	1.77293	0.000251641	0.00521701	6.10758			up
	957	ENSG00000271991	1.96495	0.000251825	0.00521701	6.83442	TTC32-DT	TTC32-DT	up
	961	ENSG00000225742	1.62435	0.000256126	0.00528403	4.53031	LINC02036	LINC02036	up
	963	ENSG00000087470	0.304375	0.000258114	0.00530847	1.01403	DNM1L	DNM1L	up
	965	ENSG00000004799	1.37431	0.000258768	0.00531642	4.30375	PDK4	PDK4	up
	966	ENSG00000163041	0.375578	0.000259302	0.00532187	1.23068	H3-3A	H3-3A	up
	967	ENSG00000254759	0.904767	0.000261044	0.00535208	2.82636	NAP1L1P1	NAP1L1P1	up
	968	ENSG00000267107	1.89238	0.000262324	0.00537276	6.48682	PCAT19	PCAT19	up
	969	ENSG00000180481	1.56872	0.000264814	0.00541817	4.78376	GLIPR1L2	GLIPR1L2	up
	970	ENSG00000163029	0.328961	0.000268608	0.00549013	1.08455	SMC6	SMC6	up
	971	ENSG00000160321	0.546144	0.00027016	0.00551617	1.73071	ZNF208	ZNF208	up
	973	ENSG00000173674	0.295458	0.000273145	0.00556564	0.982641	EIF1AX	EIF1AX	unchanged
	974	ENSG00000153064	2.18264	0.000273722	0.00557168	7.7442	BANK1	BANK1	up
	975	ENSG00000286208	2.11477	0.000275981	0.0056119	6.37752			up
	976	ENSG00000173295	1.3552	0.000280035	0.0056885	3.97873	FAM86B3P	FAM86B3P	up
	979	ENSG00000105971	0.450149	0.00028301	0.00573421	1.44153	CAV2	CAV2	up
	981	ENSG00000010072	0.366295	0.000283975	0.00573914	1.19081	SPRTN	SPRTN	up
	982	ENSG00000165730	0.778419	0.000285039	0.00575477	2.41408	STOX1	STOX1	up
	983	ENSG00000112144	0.462957	0.000286686	0.00578214	1.47777	CILK1	CILK1	up
	985	ENSG00000151239	0.411686	0.000289072	0.00581842	1.32499	TWF1	TWF1	up
	986	ENSG00000166415	0.377312	0.000292823	0.00588794	1.22175	WDR72	WDR72	up
	987	ENSG00000164323	0.461237	0.000293845	0.00590251	1.47125	CFAP97	CFAP97	up
	988	ENSG00000179528	1.87548	0.000303185	0.00608396	6.32993	LBX2	LBX2	up
	989	ENSG00000259343	0.994655	0.00030394	0.00609293	3.06272	TMC3-AS1	TMC3-AS1	up
	990	ENSG00000111727	0.955728	0.000309953	0.0062072	2.94367	HCFC2	HCFC2	up
	992	ENSG00000166503	0.355343	0.00031069	0.00620941	1.15306	HDGFL3	HDGFL3	up
	993	ENSG00000172954	0.471739	0.000314447	0.00627818	1.49169	LCLAT1	LCLAT1	up
	994	ENSG00000133318	0.265344	0.00031774	0.00633754	0.879796	RTN3	RTN3	unchanged
	995	ENSG00000238103	1.16661	0.000319944	0.00637509	3.66085	RPL9P7	RPL9P7	up
	996	ENSG00000066279	0.431017	0.000321315	0.00639343	1.3709	ASPM	ASPM	up
	998	ENSG00000232931	1.27111	0.000322109	0.00639894	3.97148	LINC00342	LINC00342	up
	1001	ENSG00000269825	1.45915	0.000328266	0.00650169	4.2891		LOC122539214	up
	1002	ENSG00000130812	1.91539	0.000329733	0.00652423	6.4057	ANGPTL6	ANGPTL6	up
	1003	ENSG00000258891	1.76026	0.00033008	0.00652458	5.71763			up
	1006	ENSG00000279207	1.96013	0.00033125	0.0065341	5.62092			up
	1009	ENSG00000106460	0.450703	0.000337039	0.00661793	1.42147	TMEM106B	TMEM106B	up
	1010	ENSG00000289447	1.87452	0.000337139	0.00661793	6.19863			up
	1012	ENSG00000285822	0.613456	0.000341225	0.00668491	1.89644			up
	1013	ENSG00000254480	1.1762	0.000342976	0.00671257	3.51188	LINC02749	LINC02749	up
	1015	ENSG00000289222	1.68666	0.000346346	0.00676517	4.74178			up
	1016	ENSG00000239322	1.83127	0.00034796	0.00679002	6.00743	ATP6V1B1-AS1	ATP6V1B1-AS1	up
	1017	ENSG00000215838	2.16574	0.000349603	0.00680868	7.34031		LOC440700	up
	1018	ENSG00000256442	1.8753	0.000349439	0.00680868	6.18754		LOC105369728	up
	1019	ENSG00000257267	0.493022	0.000350685	0.00682305	1.54218	ZNF271P	ZNF271P	up
	1020	ENSG00000164197	2.18375	0.000352982	0.006861	7.43651	RNF180	RNF180	up
	1021	ENSG00000164675	1.81542	0.000354848	0.00689051	5.17195	IQUB	IQUB	up
	1022	ENSG00000240291	1.87202	0.000355288	0.00689231	5.25556			up
	1023	ENSG00000270388	2.55065	0.00035655	0.00691003	0.682628	MTCO3P22	MTCO3P22	unchanged
	1024	ENSG00000152348	0.345421	0.00035716	0.00691447	1.10956	ATG10	ATG10	up
	1025	ENSG00000241170	1.04297	0.000357477	0.00691447	3.12342			up
	1026	ENSG00000213468	0.472897	0.000358042	0.00691866	1.47686	FIRRE	FIRRE	up
	1028	ENSG00000263080	1.76297	0.00035877	0.00692538	5.67369		LOC105371083	up
	1029	ENSG00000101935	0.527845	0.000360013	0.00692972	1.63502	AMMECR1	AMMECR1	up
	1030	ENSG00000280128	1.03712	0.000359759	0.00692972	3.13772			up
	1034	ENSG00000277112	2.48887	0.000362466	0.00694995	8.3946	ANKRD20A21P	ANKRD20A21P	up
	1035	ENSG00000238317	2.0649	0.000365335	0.0069982	6.96749	SNORD11	SNORD11	up
	1036	ENSG00000124249	1.87177	0.000367099	0.00702519	6.14663	KCNK15	KCNK15	up
	1037	ENSG00000132639	0.988379	0.000371046	0.00708022	2.93555	SNAP25	SNAP25	up
	1039	ENSG00000289421	1.35394	0.000370358	0.00708022	3.82452			up
	1040	ENSG00000227954	2.12521	0.000375411	0.00715663	7.19068	TARID	TARID	up
	1043	ENSG00000283740	0.929131	0.000377738	0.00718391	2.71069	TAF11L11	TAF11L11	up
	1045	ENSG00000289253	1.92944	0.0003849	0.00730241	6.35725			up
	1046	ENSG00000247151	1.90169	0.000390056	0.00739316	6.22415	CSTF3-DT	CSTF3-DT	up
	1048	ENSG00000113749	1.85059	0.000394788	0.00746858	6.00258	HRH2	HRH2	up
	1049	ENSG00000287166	2.28451	0.000395585	0.00747653	7.63741			up
	1051	ENSG00000043093	0.506005	0.00039972	0.00753706	1.55837	DCUN1D1	DCUN1D1	up
	1054	ENSG00000151725	0.251971	0.000401313	0.00754879	0.82386	CENPU	CENPU	unchanged
	1055	ENSG00000163808	0.414224	0.000402244	0.00755913	1.29452	KIF15	KIF15	up
	1057	ENSG00000286707	1.89523	0.000405011	0.00759807	6.87713			up
	1059	ENSG00000157077	0.359378	0.000406088	0.00760254	1.13459	ZFYVE9	ZFYVE9	up
	1060	ENSG00000253485	1.74466	0.000407684	0.00761261	5.02793	PCDHGA5	PCDHGA5	up
	1061	ENSG00000257511	0.606229	0.000407777	0.00761261	1.84011		LOC100420981	up
	1066	ENSG00000172969	1.6073	0.000416547	0.00774715	4.97405	FRG2C	FRG2C	up
	1067	ENSG00000137807	0.205581	0.000418421	0.0077747	0.682275	KIF23	KIF23	unchanged
	1069	ENSG00000210176	0.793558	0.000419326	0.00777694	2.36925	MT-TH	MT-TH	up
	1071	ENSG00000104112	1.9928	0.000421738	0.00780707	6.53835	SCG3	SCG3	up
	1076	ENSG00000099940	0.322426	0.00043967	0.00810121	1.02495	SNAP29	SNAP29	up
	1077	ENSG00000224321	1.21178	0.000443407	0.00816247	3.61173	RPL12P14	RPL12P14	up
	1078	ENSG00000075643	0.415902	0.000445581	0.00819489	1.28444	MOCOS	MOCOS	up
	1079	ENSG00000108298	0.377139	0.000446254	0.00819967	1.17773	RPL19	RPL19	up
	1080	ENSG00000122481	0.595592	0.000447526	0.00820026	1.79241	RWDD3	RWDD3	up
	1083	ENSG00000279259	1.60234	0.000448293	0.00820669	4.18545			up
	1084	ENSG00000277969	0.348042	0.000452764	0.0082809	1.09223			up
	1086	ENSG00000072657	1.37507	0.000455276	0.00831152	4.01841	TRHDE	TRHDE	up
	1089	ENSG00000204899	0.395568	0.00046107	0.0083941	1.22915	MZT1	MZT1	up
	1090	ENSG00000287048	2.18279	0.000462545	0.00841323	7.20285			up
	1092	ENSG00000260572	1.78452	0.000466182	0.00846385	5.58123	PPM1L-DT	PPM1L-DT	up
	1093	ENSG00000231503	0.476433	0.000468003	0.00848913	1.44778	PTMAP4	PTMAP4	up
	1094	ENSG00000280193	2.36923	0.000469315	0.00850515	8.05955			up
	1095	ENSG00000119906	0.345661	0.000472035	0.00854663	1.08292	SLF2	SLF2	up
	1097	ENSG00000066654	0.382648	0.000473471	0.00855701	1.18914	THUMPD1	THUMPD1	up
	1098	ENSG00000102445	1.77567	0.000474817	0.00855793	5.57286	RUBCNL	RUBCNL	up
	1099	ENSG00000135002	0.493982	0.000474483	0.00855793	1.49939	RFK	RFK	up
	1100	ENSG00000138336	0.537639	0.000474559	0.00855793	1.61927	TET1	TET1	up
	1102	ENSG00000264235	1.75986	0.000477554	0.00859164	5.47058	MYL12-AS1	MYL12-AS1	up
	1103	ENSG00000165325	1.77426	0.000481227	0.00864392	5.04436	DEUP1	DEUP1	up
	1104	ENSG00000185834	0.657239	0.000481332	0.00864392	1.95503	RPL12P4	RPL12P4	up
	1105	ENSG00000165490	0.49528	0.000481876	0.00864587	1.49937	DDIAS	DDIAS	up
	1106	ENSG00000100558	1.83137	0.000484033	0.0086767	5.76793	PLEK2	PLEK2	up
	1110	ENSG00000077616	0.788778	0.000491655	0.00878159	2.31454	NAALAD2	NAALAD2	up
	1112	ENSG00000129128	0.296747	0.000495326	0.00883124	0.939625	SPCS3	SPCS3	unchanged
	1114	ENSG00000137500	0.397091	0.000496915	0.00884366	1.22144	CCDC90B	CCDC90B	up
	1115	ENSG00000233381	1.98298	0.000499126	0.00887503	5.45784	AK4P3	AK4P3	up
	1116	ENSG00000251192	0.97804	0.000500398	0.00888968	2.85714	ZNF674	ZNF674	up
	1118	ENSG00000147003	1.45643	0.00050242	0.00890963	4.35109	CLTRN	CLTRN	up
	1120	ENSG00000152578	1.85571	0.000503862	0.0089113	5.84257	GRIA4	GRIA4	up
	1121	ENSG00000275180	1.20644	0.000503499	0.0089113	3.5443			up
	1122	ENSG00000130818	0.461852	0.000504418	0.00891319	1.40253	ZNF426	ZNF426	up
	1123	ENSG00000225200	1.27787	0.000504964	0.00891488	3.84579		RPS8P1	up
	1125	ENSG00000169062	0.292581	0.000510856	0.00900287	0.925923	UPF3A	UPF3A	unchanged
	1126	ENSG00000196705	0.683553	0.000511594	0.00900788	2.0231	ZNF431	ZNF431	up
	1127	ENSG00000107863	0.437862	0.000516109	0.00907013	1.3268	ARHGAP21	ARHGAP21	up
	1128	ENSG00000147419	0.185359	0.000515714	0.00907013	0.609144	CCDC25	CCDC25	unchanged
	1130	ENSG00000165584	1.20175	0.000517615	0.00908162	3.18887	SSX3	SSX3	up
	1131	ENSG00000006007	0.311461	0.000519786	0.00911165	0.978194	GDE1	GDE1	unchanged
	1132	ENSG00000151292	0.573932	0.00052271	0.00915482	1.70821	CSNK1G3	CSNK1G3	up
	1133	ENSG00000111837	1.87072	0.000523914	0.00916027	4.96426	MAK	MAK	up
	1135	ENSG00000151917	0.687046	0.000525376	0.00917718	2.00001	BEND6	BEND6	up
	1137	ENSG00000196418	0.476251	0.000528786	0.00921704	1.43377	ZNF124	ZNF124	up
	1138	ENSG00000253394	2.42368	0.000529052	0.00921704	7.99183	LINC00534	LINC00534	up
	1140	ENSG00000233672	1.82669	0.000534868	0.00930921	4.88738	RNASEH2B-AS1	RNASEH2B-AS1	up
	1143	ENSG00000285407	0.686852	0.000536229	0.00931634	2.01599			up
	1144	ENSG00000290114	2.25226	0.000536659	0.00931634	7.47731	NA	NA	up
	1145	ENSG00000165525	0.327863	0.000538716	0.00931988	1.02071	NEMF	NEMF	up
	1147	ENSG00000198000	0.380192	0.000544232	0.00940711	1.16569	NOL8	NOL8	up
	1149	ENSG00000169519	0.577738	0.000545581	0.009414	1.70727	METTL15	METTL15	up
	1150	ENSG00000225335	1.94544	0.000549021	0.00946511	6.13425			up
	1155	ENSG00000249156	1.39394	0.000555177	0.00952982	3.17928	TAF11L12	TAF11L12	up
	1157	ENSG00000076258	2.05027	0.000558838	0.00956388	6.53529	FMO4	FMO4	up
	1161	ENSG00000260711	2.39003	0.000561229	0.00958392	7.97072			up
	1162	ENSG00000185842	0.632238	0.000564069	0.00962413	1.85189	DNAH14	DNAH14	up
	1163	ENSG00000198420	0.470676	0.000576092	0.00982082	1.40666	TCAF1	TCAF1	up
	1165	ENSG00000165633	0.731823	0.000578616	0.00985314	2.10509	VSTM4	VSTM4	up
	1166	ENSG00000244675	2.23857	0.000581245	0.00988316	6.03898			up
	1167	ENSG00000155545	0.491107	0.000585976	0.00995507	1.45586	MIER3	MIER3	up
	1168	ENSG00000203593	1.93333	0.000592922	0.0100644	5.99163			up
	1169	ENSG00000286214	1.26739	0.000593759	0.01007	3.59116	COPG2IT1	COPG2IT1	up
	1172	ENSG00000075292	0.368209	0.000598724	0.0101282	1.12236	ZNF638	ZNF638	up
	1173	ENSG00000140830	0.459509	0.000599491	0.0101326	1.37213	TXNL4B	TXNL4B	up
	1177	ENSG00000240898	0.407884	0.000613057	0.0103267	1.21921		RPL21P125	up
	1179	ENSG00000215146	0.680315	0.000618492	0.010399	1.97087		LOC441666	up
	1181	ENSG00000276368	1.55997	0.00061972	0.0104035	4.64389	H2AC14	H2AC14	up
	1182	ENSG00000118482	0.504694	0.000620731	0.0104102	1.48912	PHF3	PHF3	up
	1183	ENSG00000119820	0.521113	0.000621168	0.0104102	1.5333	YIPF4	YIPF4	up
	1186	ENSG00000242970	0.865838	0.000629581	0.0105245	2.48048			up
	1187	ENSG00000281398	0.648563	0.000630324	0.0105281	1.87457	SNHG4	SNHG4	up
	1188	ENSG00000197619	0.822596	0.000633608	0.010574	2.33615	ZNF615	ZNF615	up
	1190	ENSG00000269054	1.95053	0.000634409	0.0105746	6.02322	ZNF497-AS1	ZNF497-AS1	up
	1192	ENSG00000174501	0.624272	0.000639876	0.0106428	1.80313	ANKRD36C	ANKRD36C	up
	1193	ENSG00000231154	1.71391	0.000642117	0.0106711	5.08946	MORF4L2-AS1	MORF4L2-AS1	up
	1198	ENSG00000240401	1.90452	0.000653134	0.0108089	4.9142			up
	1201	ENSG00000214922	1.26983	0.000661389	0.0109182	3.53881	HLA-F-AS1	HLA-F-AS1	up
	1202	ENSG00000249898	1.05555	0.000662142	0.0109215	2.85916	MCPH1-AS1	MCPH1-AS1	up
	1203	ENSG00000248837	1.53009	0.000663557	0.0109357	3.77702		LOC105374524	up
	1204	ENSG00000206432	2.32228	0.000670819	0.0110462	7.35002	TMEM200C	TMEM200C	up
	1206	ENSG00000151773	1.34294	0.000674624	0.0110813	3.84742	CCDC122	CCDC122	up
	1207	ENSG00000280399	2.34418	0.000674301	0.0110813	7.31437			up
	1212	ENSG00000183474	0.496818	0.000683919	0.0111876	1.45059	GTF2H2C	GTF2H2C	up
	1213	ENSG00000141446	0.57974	0.000684842	0.0111935	1.67587	ESCO1	ESCO1	up
	1215	ENSG00000114933	0.777571	0.000689023	0.0112433	2.20158	INO80D	INO80D	up
	1220	ENSG00000288866	1.79871	0.00070041	0.0113822	4.48814			up
	1222	ENSG00000181904	0.481714	0.00070293	0.0114045	1.40951	C5orf24	C5orf24	up
	1223	ENSG00000150672	2.11348	0.000704023	0.011406	5.63148	DLG2	DLG2	up
	1224	ENSG00000164151	0.539653	0.000704175	0.011406	1.56056	ICE1	ICE1	up
	1227	ENSG00000216854	1.24816	0.000720312	0.0116389	3.52987	RPL17P26	RPL17P26	up
	1228	ENSG00000141429	0.569619	0.000722002	0.0116567	1.63977	GALNT1	GALNT1	up
	1230	ENSG00000224415	0.552248	0.000725096	0.0116893	1.58536			up
	1231	ENSG00000119950	0.406931	0.000728921	0.0117397	1.20712	MXI1	MXI1	up
	1232	ENSG00000165511	1.9828	0.000734058	0.0117946	6.02653	ZNF22-AS1	ZNF22-AS1	up
	1233	ENSG00000227855	1.95676	0.000734024	0.0117946	5.90853	DPY19L2P3	DPY19L2P3	up
	1234	ENSG00000233101	2.02928	0.000734111	0.0117946	5.31099	HOXB-AS3	HOXB-AS3	up
	1236	ENSG00000203711	1.78027	0.000740128	0.011872	4.42073	LINC02901	LINC02901	up
	1238	ENSG00000104213	0.836171	0.000745307	0.0119165	2.33961	PDGFRL	PDGFRL	up
	1240	ENSG00000188322	0.408882	0.000744928	0.0119165	1.2069	SBK1	SBK1	up
	1242	ENSG00000204620	1.51407	0.000746784	0.0119238	4.18227			up
	1243	ENSG00000204852	0.487064	0.000747577	0.0119238	1.41353	TCTN1	TCTN1	up
	1245	ENSG00000134717	0.22614	0.000748874	0.0119254	0.710604	BTF3L4	BTF3L4	unchanged
	1247	ENSG00000125384	1.67821	0.000753885	0.011986	4.8795	PTGER2	PTGER2	up
	1248	ENSG00000185561	0.710561	0.000766591	0.0121782	1.99724	TLCD2	TLCD2	up
	1249	ENSG00000169744	0.278918	0.000769291	0.0122113	0.854358	LDB2	LDB2	unchanged
	1253	ENSG00000287923	2.24402	0.000772892	0.0122319	7.02561			up
	1254	ENSG00000107949	0.238737	0.000774294	0.0122417	0.744539	BCCIP	BCCIP	unchanged
	1255	ENSG00000104047	0.46268	0.000791826	0.012509	1.34156	DTWD1	DTWD1	up
	1256	ENSG00000234405	1.60268	0.000792965	0.012517	4.15542			up
	1258	ENSG00000242477	0.640345	0.000798751	0.0125883	1.79376		RPL10AP9	up
	1259	ENSG00000105810	0.376838	0.000800735	0.0126057	1.11721	CDK6	CDK6	up
	1260	ENSG00000278743	1.2223	0.000801131	0.0126057	3.4171			up
	1263	ENSG00000264204	2.06759	0.000804983	0.0126363	6.22785	AGAP7P	AGAP7P	up
	1264	ENSG00000251867	2.00404	0.000807343	0.0126536	5.04767			up
	1265	ENSG00000259172	2.13501	0.000807362	0.0126536	6.50536	SNRPA1-DT	SNRPA1-DT	up
	1268	ENSG00000139496	0.544401	0.000815493	0.0127508	1.55124	NUP58	NUP58	up
	1269	ENSG00000249383	2.23943	0.000818949	0.0127947	6.9412	LINC02071	LINC02071	up
	1272	ENSG00000224965	1.98429	0.000825175	0.0128654	5.92211	LINC02586	LINC02586	up
	1274	ENSG00000111371	0.316604	0.000828767	0.0128973	0.966816	SLC38A1	SLC38A1	unchanged
	1275	ENSG00000147604	0.257101	0.000834955	0.0129834	0.788333	RPL7	RPL7	unchanged
	1276	ENSG00000198821	1.51471	0.000836749	0.0129931	3.62003	CD247	CD247	up
	1279	ENSG00000259577	2.18287	0.0008382	0.0129931	6.72852	CERNA1	CERNA1	up
	1280	ENSG00000106305	0.498771	0.000839049	0.0129961	1.42603	AIMP2	AIMP2	up
	1282	ENSG00000133302	0.383255	0.000844695	0.0130631	1.12441	SLF1	SLF1	up
	1283	ENSG00000213638	1.35153	0.000848902	0.0131077	3.69963	ADAT3	ADAT3	up
	1284	ENSG00000240405	1.75536	0.000848777	0.0131077	5.02772	SAMMSON	SAMMSON	up
	1285	ENSG00000021574	0.423163	0.000851423	0.0131216	1.22848	SPAST	SPAST	up
	1287	ENSG00000258682	1.93127	0.000851787	0.0131216	5.69815			up
	1288	ENSG00000261046	2.68898	0.000855176	0.0131636	0.522201	C2orf69P1	C2orf69P1	unchanged
	1289	ENSG00000123739	0.424649	0.000856369	0.0131717	1.22758	PLA2G12A	PLA2G12A	up
	1290	ENSG00000124900	1.58241	0.000857431	0.0131778	3.66377	TRIM51	TRIM51	up
	1291	ENSG00000145817	0.449883	0.000859239	0.0131852	1.28999	YIPF5	YIPF5	up
	1295	ENSG00000272894	2.10924	0.000867225	0.0132769	6.36019	MIOS-DT	MIOS-DT	up
	1298	ENSG00000185947	0.686266	0.000875083	0.0133663	1.9056	ZNF267	ZNF267	up
	1299	ENSG00000205274	1.68149	0.000880297	0.0134355	4.13032	TRBV20OR9-2	TRBV20OR9-2	up
	1301	ENSG00000113851	0.347677	0.000883427	0.0134548	1.02709	CRBN	CRBN	up
	1304	ENSG00000138756	1.05224	0.000884772	0.0134548	2.87007	BMP2K	BMP2K	up
	1306	ENSG00000197841	0.609836	0.000895048	0.0135771	1.69251	ZNF181	ZNF181	up
	1307	ENSG00000226757	2.05104	0.000894453	0.0135771	6.05864	PP12613	PP12613	up
	1309	ENSG00000235652	1.33618	0.000901377	0.0136418	3.63748	FBXO30-DT	EPM2A-DT	up
	1311	ENSG00000272800	1.89162	0.000902636	0.0136504	5.50862			up
	1313	ENSG00000177788	1.30796	0.000906295	0.013664	3.49699		RAB4A-AS1	up
	1314	ENSG00000198134	0.500097	0.000905595	0.013664	1.41	PTMAP9	PTMAP9	up
	1315	ENSG00000279227	2.07281	0.00090577	0.013664	6.1776			up
	1316	ENSG00000196972	1.84862	0.000909201	0.0136974	4.94437	SMIM10L2B	SMIM10L2B	up
	1317	ENSG00000081138	1.40137	0.000912044	0.0137298	3.62955	CDH7	CDH7	up
	1319	ENSG00000260815	1.45024	0.000913923	0.0137373	3.80746	PPIAP47	PPIAP47	up
	1320	ENSG00000186676	0.714685	0.000914997	0.013743	1.96516	EEF1GP1	EEF1GP1	up
	1325	ENSG00000128609	0.319158	0.000935333	0.0139868	0.947121	NDUFA5	NDUFA5	unchanged
	1329	ENSG00000119899	0.464012	0.000949624	0.0141665	1.31948	SLC17A5	SLC17A5	up
	1331	ENSG00000234493	0.485453	0.000958299	0.0142744	1.37278	RHOXF1P1	RHOXF1P1	up
	1333	ENSG00000145087	2.10488	0.000967381	0.0143845	6.23981	STXBP5L	STXBP5L	up
	1334	ENSG00000197291	1.54611	0.000967865	0.0143845	3.90215	RAMP2-AS1	RAMP2-AS1	up
	1336	ENSG00000226310	2.52325	0.000986217	0.0146321	0.689065			unchanged
	1339	ENSG00000272192	2.28967	0.000995234	0.014736	6.86127	PDE7A-DT	PDE7A-DT	up
	1340	ENSG00000244585	0.774683	0.00100169	0.0148205	2.06832	RPL12P33	RPL12P33	up
	1344	ENSG00000198759	1.92796	0.00101487	0.0149708	5.50932	EGFL6	EGFL6	up
	1345	ENSG00000186976	2.17401	0.00102038	0.0150307	6.42914	EFCAB6	EFCAB6	up
	1348	ENSG00000120049	1.80294	0.00102657	0.0150985	5.05365	KCNIP2	KCNIP2	up
	1351	ENSG00000198673	1.21507	0.00103501	0.0151888	3.22491	TAFA2	TAFA2	up
	1353	ENSG00000119397	0.298789	0.00103703	0.0152033	0.885394	CNTRL	CNTRL	unchanged
	1355	ENSG00000169604	0.447691	0.00103778	0.0152033	1.26454	ANTXR1	ANTXR1	up
	1356	ENSG00000166164	0.320667	0.00104102	0.0152206	0.941375	BRD7	BRD7	unchanged
	1357	ENSG00000063515	2.16808	0.0010442	0.015256	6.38368	GSC2	GSC2	up
	1359	ENSG00000139946	0.397898	0.00105338	0.0153561	1.13096	PELI2	PELI2	up
	1360	ENSG00000228201	1.97367	0.00105311	0.0153561	5.64752			up
	1361	ENSG00000290018	1.571	0.00105674	0.0153937	4.3662	NA	NA	up
	1362	ENSG00000184194	1.65191	0.00105785	0.0153986	4.38786	GPR173	GPR173	up
	1363	ENSG00000137876	0.310786	0.00105939	0.0154097	0.914253	RSL24D1	RSL24D1	unchanged
	1365	ENSG00000120675	1.89379	0.0010657	0.0154732	5.34277	DNAJC15	DNAJC15	up
	1373	ENSG00000272173	1.96237	0.00107968	0.0155927	5.55099			up
	1376	ENSG00000100528	0.319966	0.00109488	0.0157755	0.93356	CNIH1	CNIH1	unchanged
	1378	ENSG00000267940	2.33697	0.00109743	0.0157892	6.91302			up
	1380	ENSG00000172380	0.361836	0.00110592	0.0158957	1.04083	GNG12	GNG12	up
	1384	ENSG00000165732	0.330877	0.00112548	0.0161227	0.959783	DDX21	DDX21	unchanged
	1390	ENSG00000240616	0.440191	0.00113228	0.0161506	1.23311	RPS6P25	RPS6P25	up
	1391	ENSG00000218739	0.324484	0.00113454	0.0161706	0.945002	CEBPZOS	CEBPZOS	unchanged
	1393	ENSG00000186522	0.417872	0.0011371	0.0161839	1.17934	SEPTIN10	SEPTIN10	up
	1396	ENSG00000241622	1.96914	0.00114745	0.0162963	5.53462	RARRES2P1	RARRES2P1	up
	1397	ENSG00000188177	0.443399	0.00115181	0.0163346	1.24029	ZC3H6	ZC3H6	up
	1398	ENSG00000255947	1.90993	0.0011515	0.0163346	5.29127			up
	1400	ENSG00000128294	0.51964	0.00115763	0.0163847	1.4327	TPST2	TPST2	up
	1402	ENSG00000111640	0.257863	0.00116099	0.0164008	0.766667	GAPDH	GAPDH	unchanged
	1403	ENSG00000120370	0.497337	0.00116392	0.0164008	1.36954	GORAB	GORAB	up
	1404	ENSG00000142556	0.428243	0.00116367	0.0164008	1.19774	ZNF614	ZNF614	up
	1406	ENSG00000182923	0.540049	0.001162	0.0164008	1.47542	CEP63	CEP63	up
	1407	ENSG00000232022	1.2405	0.00116358	0.0164008	3.2465	FAAHP1	FAAHP1	up
	1408	ENSG00000120952	1.628	0.00117249	0.0165097	4.3282	PRAMEF2	PRAMEF2	up
	1409	ENSG00000104221	1.28841	0.00117844	0.0165627	3.14604	BRF2	BRF2	up
	1410	ENSG00000197479	1.91529	0.00117807	0.0165627	4.77743	PCDHB11	PCDHB11	up
	1412	ENSG00000284306	1.61089	0.00118203	0.0165969	4.26737	SSU72P2	SSU72P2	up
	1413	ENSG00000162441	0.345452	0.00118662	0.0166496	0.991824	LZIC	LZIC	unchanged
	1415	ENSG00000188825	2.03674	0.00119115	0.0166896	5.05952	LINC00910	LINC00910	up
	1417	ENSG00000285761	2.1384	0.00120111	0.0168058	6.14354			up
	1419	ENSG00000140104	0.972585	0.00120602	0.0168503	2.52701	CLBA1	CLBA1	up
	1420	ENSG00000274750	1.75538	0.00120845	0.0168723	4.87976	H3C6	H3C6	up
	1421	ENSG00000233006	1.75054	0.00121268	0.0169195	3.97735	MIR3936HG	MIR3936HG	up
	1422	ENSG00000048545	1.66908	0.00121449	0.0169328	3.71044	GUCA1A	GUCA1A	up
	1425	ENSG00000267742	0.65552	0.0012374	0.0172159	1.73199	SINHCAFP2	SINHCAFP2	up
	1426	ENSG00000179152	0.552366	0.00124149	0.0172607	1.49663	TCAIM	TCAIM	up
	1428	ENSG00000123352	0.311199	0.00125077	0.0173654	0.897855	SPATS2	SPATS2	unchanged
	1429	ENSG00000225159	0.513508	0.00125182	0.0173678	1.39915	NPM1P39	NPM1P39	up
	1430	ENSG00000248079	1.9781	0.0012589	0.0174539	5.44995	DPH6-DT	DPH6-DT	up
	1433	ENSG00000213965	2.03424	0.00126518	0.0175042	5.68757	NUDT19	NUDT19	up
	1435	ENSG00000134899	1.42775	0.00126868	0.0175171	3.67868	ERCC5	ERCC5	up
	1436	ENSG00000256053	0.363517	0.00126836	0.0175171	1.02544	COA8	COA8	up
	1437	ENSG00000210100	0.88604	0.00127537	0.0175838	2.30494	MT-TI	MT-TI	up
	1438	ENSG00000267219	2.01395	0.00127449	0.0175838	5.60291			up
	1441	ENSG00000153250	0.345799	0.00128082	0.0176221	0.984249	RBMS1	RBMS1	unchanged
	1442	ENSG00000243312	1.15938	0.00128352	0.017647	2.99959		RPL6P13	up
	1443	ENSG00000285130	1.87945	0.00128519	0.0176578	5.12494			up
	1444	ENSG00000265590	1.26046	0.00128668	0.0176661	3.25964	CFAP298-TCP10L	CFAP298-TCP10L	up
	1447	ENSG00000164458	2.15593	0.00130143	0.0178315	6.09759	TBXT	TBXT	up
	1448	ENSG00000255559	2.14996	0.0013043	0.0178584	6.1155	ZNF252P-AS1	ZNF252P-AS1	up
	1453	ENSG00000056097	0.290903	0.00132347	0.0180462	0.843329	ZFR	ZFR	unchanged
	1455	ENSG00000138119	1.3766	0.00132825	0.0180865	3.40635	MYOF	MYOF	up
	1456	ENSG00000275880	2.09418	0.00132813	0.0180865	5.01686			up
	1458	ENSG00000101134	1.99032	0.00133165	0.0181079	4.69966	DOK5	DOK5	up
	1459	ENSG00000149948	0.493817	0.0013328	0.0181111	1.34447	HMGA2	HMGA2	up
	1460	ENSG00000121621	0.377446	0.00133775	0.0181596	1.06045	KIF18A	KIF18A	up
	1464	ENSG00000289046	1.4103	0.00134705	0.0182422	3.29574			up
	1465	ENSG00000145740	0.317806	0.00134985	0.0182676	0.909063	SLC30A5	SLC30A5	unchanged
	1466	ENSG00000063176	1.58268	0.00136392	0.0184329	3.83567	SPHK2	SPHK2	up
	1467	ENSG00000198707	0.402456	0.0013639	0.0184329	1.11897	CEP290	CEP290	up
	1469	ENSG00000171160	1.55764	0.00137519	0.0185587	3.95586	MORN4	MORN4	up
	1471	ENSG00000134874	0.51963	0.00139558	0.0188095	1.39984	DZIP1	DZIP1	up
	1475	ENSG00000138660	0.367752	0.00142303	0.0191016	1.02888	AP1AR	AP1AR	up
	1477	ENSG00000177694	1.5796	0.00142152	0.0191016	3.80731	NAALADL2	NAALADL2	up
	1478	ENSG00000083535	0.782533	0.00142453	0.0191088	2.02014	PIBF1	PIBF1	up
	1480	ENSG00000133519	2.33177	0.00143007	0.0191463	0.747732	ZDHHC8P1	ZDHHC8P1	unchanged
	1482	ENSG00000225661	1.47261	0.00143045	0.0191463	3.71976	RPL14P5	RPL14P5	up
	1483	ENSG00000134285	0.337375	0.00143254	0.0191514	0.953315	FKBP11	FKBP11	unchanged
	1484	ENSG00000290085	1.79763	0.00144438	0.0192966	4.19528	NA	NA	up
	1486	ENSG00000099822	2.03978	0.0014553	0.0193831	5.54503	HCN2	HCN2	up
	1487	ENSG00000109881	0.359843	0.0014562	0.0193831	1.00863	CCDC34	CCDC34	up
	1488	ENSG00000143776	0.52918	0.00145235	0.0193831	1.4158	CDC42BPA	CDC42BPA	up
	1490	ENSG00000203411	1.2776	0.00145328	0.0193831	3.21756	Metazoa_SRP	Metazoa_SRP	up
	1491	ENSG00000227279	1.99988	0.00146205	0.0194411	5.4421			up
	1493	ENSG00000176994	0.535806	0.00146839	0.0194992	1.42397	SMCR8	SMCR8	up
	1494	ENSG00000289314	2.22802	0.00147187	0.0195324	6.26161			up
	1496	ENSG00000269964	2.51135	0.00147795	0.0195868	0.673589	MEI4	MEI4	unchanged
	1497	ENSG00000146677	0.718183	0.00148389	0.0196524	1.85867	RPL32P18	RPL32P18	up
	1498	ENSG00000047617	1.70582	0.00148614	0.0196612	3.702	ANO2	ANO2	up
	1499	ENSG00000117600	1.78036	0.00148654	0.0196612	4.63903	PLPPR4	PLPPR4	up
	1500	ENSG00000094975	0.462206	0.00148855	0.0196747	1.25166	SUCO	SUCO	up
	1502	ENSG00000174718	0.571438	0.00149391	0.0197192	1.51103	RESF1	RESF1	up
	1503	ENSG00000273373	1.57172	0.0014962	0.0197363	3.7022			up
	1509	ENSG00000065548	0.237645	0.0015216	0.0199915	0.695752	ZC3H15	ZC3H15	unchanged
	1513	ENSG00000210194	1.00765	0.00153143	0.0200675	2.53467	MT-TE	MT-TE	up
	1515	ENSG00000170381	0.477387	0.00154233	0.0201836	1.27772	SEMA3E	SEMA3E	up
	1516	ENSG00000100129	0.361751	0.00155375	0.0203197	1.00581	EIF3L	EIF3L	up
	1518	ENSG00000271826	2.25364	0.00155774	0.020345	0.884285	PLS3-AS1	PLS3-AS1	unchanged
	1519	ENSG00000146833	0.657347	0.00155913	0.0203498	1.68463	TRIM4	TRIM4	up
	1523	ENSG00000226221	0.427122	0.00157196	0.0204634	1.15774	RPL26P19	RPL26P19	up
	1525	ENSG00000099260	2.18914	0.0015776	0.0205098	5.9557	PALMD	PALMD	up
	1526	ENSG00000250999	1.9157	0.00158123	0.0205435	5.03872			up
	1528	ENSG00000229920	2.12136	0.00158346	0.0205496	4.91436	RPS4XP5	RPS4XP5	up
	1529	ENSG00000138378	1.96115	0.00158674	0.0205747	5.22455	STAT4	STAT4	up
	1530	ENSG00000251468	2.95842	0.00159151	0.0206231	0.407133		LOC100422204	unchanged
	1532	ENSG00000145491	1.92806	0.00159931	0.0206835	5.07742	ROPN1L	ROPN1L	up
	1533	ENSG00000249483	0.952588	0.00159781	0.0206835	2.38719			up
	1536	ENSG00000289212	1.47887	0.00160992	0.0207801	3.5336			up
	1538	ENSG00000164627	2.11184	0.00162429	0.0209384	4.95909	KIF6	KIF6	up
	1539	ENSG00000118816	0.300592	0.00164512	0.0211931	0.861995	CCNI	CCNI	unchanged
	1540	ENSG00000185664	1.48661	0.0016483	0.0212203	3.60668	PMEL	PMEL	up
	1544	ENSG00000250514	2.09483	0.00164985	0.0212215	5.61219	LINC02125	LINC02125	up
	1545	ENSG00000289161	2.01815	0.00165181	0.0212215	5.31711		LOC100310756	up
	1551	ENSG00000287059	3.34689	0.00166332	0.0212745	0.30744			unchanged
	1552	ENSG00000104081	1.40546	0.00166974	0.0212984	3.41488	BMF	BMF	up
	1554	ENSG00000163006	0.47955	0.00167062	0.0212984	1.2749	CCDC138	CCDC138	up
	1555	ENSG00000243844	0.931294	0.00166978	0.0212984	2.31345	RPL17P33	RPL17P33	up
	1556	ENSG00000273247	0.871487	0.00167155	0.0212984	2.19607	RAB33B-AS1	RAB33B-AS1	up
	1557	ENSG00000124795	0.33411	0.00167982	0.0213625	0.927288	DEK	DEK	unchanged
	1558	ENSG00000137710	0.280025	0.00167935	0.0213625	0.796124	RDX	RDX	unchanged
	1559	ENSG00000151743	1.0257	0.00167903	0.0213625	2.55201	AMN1	AMN1	up
	1560	ENSG00000179841	1.26834	0.00168284	0.0213871	3.15199	AKAP5	AKAP5	up
	1561	ENSG00000196338	2.43466	0.00168578	0.0214108	0.632422	NLGN3	NLGN3	unchanged
	1562	ENSG00000213270	1.30728	0.00168929	0.0214417	3.17013	RPL6P25	RPL6P25	up
	1563	ENSG00000250565	0.449242	0.00169214	0.0214641	1.20176	ATP6V1E2	ATP6V1E2	up
	1569	ENSG00000143494	0.495723	0.00171935	0.0217258	1.30793	VASH2	VASH2	up
	1571	ENSG00000197385	2.31874	0.00172259	0.0217451	6.31369	ZNF860	ZNF860	up
	1572	ENSG00000089234	0.356092	0.001726	0.0217675	0.979826	BRAP	BRAP	unchanged
	1575	ENSG00000136108	0.255542	0.00174267	0.0219366	0.73181	CKAP2	CKAP2	unchanged
	1580	ENSG00000289244	1.85507	0.00177563	0.0222808	4.71341			up
	1581	ENSG00000157500	0.343946	0.00177788	0.0222949	0.947945	APPL1	APPL1	unchanged
	1583	ENSG00000285813	2.31368	0.00179228	0.0224471	0.845688			unchanged
	1585	ENSG00000105976	0.468827	0.00179419	0.0224475	1.23767	MET	MET	up
	1586	ENSG00000269821	0.668207	0.00179571	0.0224475	1.69167	KCNQ1OT1	KCNQ1OT1	up
	1590	ENSG00000145604	0.289973	0.00180234	0.0224866	0.81471	SKP2	SKP2	unchanged
	1593	ENSG00000234996	1.0848	0.00180742	0.0224946	2.54572	ACTG1P25	ACTG1P25	up
	1596	ENSG00000137601	0.595695	0.00181305	0.0225319	1.52772	NEK1	NEK1	up
	1597	ENSG00000085224	0.414589	0.00181825	0.0225727	1.11236	ATRX	ATRX	up
	1598	ENSG00000255026	2.43747	0.00182115	0.0225945	0.67145			unchanged
	1599	ENSG00000250337	1.04273	0.00182376	0.0226128	2.54971	PURPL	PURPL	up
	1600	ENSG00000272892	1.39061	0.00182582	0.0226242	3.34899			up
	1601	ENSG00000270061	2.41683	0.00182725	0.0226277	0.650727			unchanged
	1602	ENSG00000281344	0.812024	0.00182989	0.0226463	2.01945	HELLPAR	HELLPAR	up
	1603	ENSG00000001629	0.434113	0.00183488	0.0226939	1.15565	ANKIB1	ANKIB1	up
	1604	ENSG00000135040	0.33737	0.00183749	0.0227121	0.92826	NAA35	NAA35	unchanged
	1606	ENSG00000228203	1.52933	0.00184377	0.0227467	3.56315	GRASLND	GRASLND	up
	1607	ENSG00000230364	1.24321	0.00184285	0.0227467	3.06335	RPL4P3	RPL4P3	up
	1608	ENSG00000259673	0.468203	0.00184489	0.0227467	1.23199	IQCH-AS1	IQCH-AS1	up
	1610	ENSG00000216624	1.01764	0.00185085	0.0227919	2.39499	GAPDHP72	GAPDHP72	up
	1613	ENSG00000143971	0.418401	0.00185799	0.0228195	1.11818	ETAA1	ETAA1	up
	1614	ENSG00000152818	0.320525	0.00185521	0.0228195	0.887507	UTRN	UTRN	unchanged
	1615	ENSG00000184635	0.388423	0.00185667	0.0228195	1.04778	ZNF93	ZNF93	up
	1617	ENSG00000144642	1.20253	0.00186705	0.0228777	2.92947	RBMS3	RBMS3	up
	1618	ENSG00000273763	0.629153	0.00186603	0.0228777	1.59518			up
	1619	ENSG00000109475	0.298452	0.00186844	0.0228806	0.832418	RPL34	RPL34	unchanged
	1621	ENSG00000114446	0.279623	0.00187533	0.0229367	0.785995	IFT57	IFT57	unchanged
	1623	ENSG00000113356	0.587811	0.00188495	0.0229975	1.50423	POLR3G	POLR3G	up
	1627	ENSG00000176853	0.362287	0.0018975	0.0231222	0.984057	FAM91A1	FAM91A1	unchanged
	1628	ENSG00000247402	2.56173	0.00191192	0.0232836	0.59064			unchanged
	1630	ENSG00000118276	1.16507	0.001926	0.0233977	2.8348	B4GALT6	B4GALT6	up
	1633	ENSG00000224765	2.27667	0.0019305	0.0234235	0.849286			unchanged
	1634	ENSG00000253636	2.19137	0.0019297	0.0234235	5.00658			up
	1636	ENSG00000070367	0.299786	0.00193883	0.0234959	0.832283	EXOC5	EXOC5	unchanged
	1639	ENSG00000222000	1.64443	0.00194177	0.0235005	3.34164			up
	1640	ENSG00000143184	2.38681	0.00195113	0.0235617	0.665871	XCL1	XCL1	unchanged
	1641	ENSG00000153201	0.403771	0.00195213	0.0235617	1.07814	RANBP2	RANBP2	up
	1642	ENSG00000176273	0.652106	0.00195258	0.0235617	1.63903	SLC35G1	SLC35G1	up
	1643	ENSG00000180329	0.36789	0.0019491	0.0235617	0.994611	CCDC43	CCDC43	unchanged
	1650	ENSG00000170264	0.573451	0.00201936	0.0242641	1.45597	FAM161A	FAM161A	up
	1652	ENSG00000235092	2.21947	0.00202769	0.0243392	0.873239	ID2-AS1	ID2-AS1	unchanged
	1653	ENSG00000287038	1.93835	0.00203254	0.0243781	4.82895			up
	1654	ENSG00000272758	1.17738	0.0020415	0.0244561	2.70202	WDR5B-DT	WDR5B-DT	up
	1657	ENSG00000151690	0.470628	0.00205057	0.0245351	1.22208	MFSD6	MFSD6	up
	1658	ENSG00000239198	0.802086	0.00205465	0.0245542	1.93999	RPL5P22	RPL5P22	up
	1659	ENSG00000265148	1.97817	0.00205427	0.0245542	4.96431	TSPOAP1-AS1	TSPOAP1-AS1	up
	1660	ENSG00000228486	1.76852	0.00207575	0.0247915	3.78919	C2orf92	C2orf92	up
	1661	ENSG00000196458	0.855005	0.00208026	0.0248252	2.06663	ZNF605	ZNF605	up
	1662	ENSG00000269421	3.02898	0.00208108	0.0248252	0.394556			unchanged
	1663	ENSG00000110013	0.309194	0.00208253	0.0248276	0.848928	SIAE	SIAE	unchanged
	1665	ENSG00000184381	1.77987	0.00209207	0.0249113	3.66677	PLA2G6	PLA2G6	up
	1667	ENSG00000289943	2.45726	0.00210273	0.0250082	0.597541	NA	NA	unchanged
	1671	ENSG00000197956	1.78808	0.0021423	0.0254178	4.30853	S100A6	S100A6	up
	1673	ENSG00000223546	1.14505	0.00214674	0.0254406	2.71601	LINC00630	LINC00630	up
	1674	ENSG00000224208	0.980424	0.00214766	0.0254406	2.28923	ZCRB1P1	ZCRB1P1	up
	1675	ENSG00000134538	1.7108	0.00215693	0.0254867	3.93126	SLCO1B1	SLCO1B1	up
	1678	ENSG00000225345	2.47691	0.00215619	0.0254867	0.603835	SNX18P3	SNX18P3	unchanged
	1679	ENSG00000060138	0.280691	0.00216689	0.0255871	0.776752	YBX3	YBX3	unchanged
	1682	ENSG00000137573	2.26745	0.00217171	0.0255983	0.80928	SULF1	SULF1	unchanged
	1683	ENSG00000046651	0.36646	0.00217807	0.025658	0.978914	OFD1	OFD1	unchanged
	1685	ENSG00000131171	0.238441	0.00219076	0.0257769	0.672088	SH3BGRL	SH3BGRL	unchanged
	1689	ENSG00000102763	0.634295	0.00220583	0.0258927	1.56716	VWA8	VWA8	up
	1690	ENSG00000267289	1.96621	0.00220961	0.0259217	4.30767	PIN1-DT	PIN1-DT	up
	1692	ENSG00000165061	1.61982	0.00221693	0.0259769	3.75313	ZMAT4	ZMAT4	up
	1696	ENSG00000162757	1.82058	0.00222649	0.0260273	4.35904	C1orf74	C1orf74	up
	1700	ENSG00000256463	1.87119	0.00224626	0.0262111	3.87305	SALL3	SALL3	up
	1703	ENSG00000251000	1.8413	0.00226078	0.0263195	3.77098	GGCTP1	GGCTP1	up
	1705	ENSG00000198056	0.321232	0.00226659	0.0263563	0.868904	PRIM1	PRIM1	unchanged
	1706	ENSG00000276115	1.76645	0.00227508	0.0264395	4.02577			up
	1709	ENSG00000171970	1.19999	0.00228494	0.0265074	2.73799	ZNF57	ZNF57	up
	1712	ENSG00000280187	0.585851	0.00229417	0.0265679	1.45477			up
	1715	ENSG00000255647	1.10902	0.00230612	0.0266595	2.58801		LOC731157	up
	1716	ENSG00000166451	0.243963	0.00230908	0.0266738	0.681513	CENPN	CENPN	unchanged
	1717	ENSG00000229525	2.35927	0.00231004	0.0266738	0.637236			unchanged
	1718	ENSG00000168301	0.668132	0.00231261	0.0266878	1.63659	KCTD6	KCTD6	up
	1719	ENSG00000260409	2.40191	0.00232568	0.0268232	0.630886			unchanged
	1721	ENSG00000261758	2.64929	0.00233439	0.0268767	0.463597	STAG1-DT	STAG1-DT	unchanged
	1722	ENSG00000279307	1.34877	0.00233379	0.0268767	3.08464	NDUFAF2P1	NDUFAF2P1	up
	1724	ENSG00000272438	2.16269	0.00234404	0.0269565	5.43485			up
	1725	ENSG00000162572	2.11622	0.00234705	0.0269755	5.28771	SCNN1D	SCNN1D	up
	1728	ENSG00000141293	2.04306	0.00235242	0.0270054	4.30437	SKAP1	SKAP1	up
	1729	ENSG00000236992	0.981488	0.00235511	0.0270054	2.28802	RPL12P12	RPL12P12	up
	1730	ENSG00000180532	1.52639	0.00235729	0.0270139	3.75687	ZSCAN4	ZSCAN4	up
	1731	ENSG00000226327	1.22365	0.00235858	0.0270139	2.79595	RPSAP49	RPSAP49	up
	1733	ENSG00000170571	0.550004	0.00236541	0.027061	1.37315	EMB	EMB	up
	1734	ENSG00000220744	0.856623	0.00237875	0.0271979	2.00486	RPL5P18	RPL5P18	up
	1736	ENSG00000289225	1.3265	0.00238427	0.0272295	3.10087			up
	1738	ENSG00000008952	0.222431	0.00239486	0.0272897	0.626266	SEC62	SEC62	unchanged
	1739	ENSG00000067900	0.345333	0.00239504	0.0272897	0.920463	ROCK1	ROCK1	unchanged
	1740	ENSG00000196872	1.11982	0.00239431	0.0272897	2.54621	CRACDL	CRACDL	up
	1741	ENSG00000225470	1.15502	0.00239669	0.0272928	2.70302	JPX	JPX	up
	1742	ENSG00000171928	0.568869	0.0024062	0.0273697	1.41063	TVP23B	TVP23B	up
	1743	ENSG00000265763	1.35389	0.00240568	0.0273697	3.09671	ZNF488	ZNF488	up
	1744	ENSG00000243859	0.589555	0.00240933	0.0273895	1.45418	RPL5P17	RPL5P17	up
	1750	ENSG00000101222	2.07826	0.00244339	0.0276815	5.07362	SPEF1	SPEF1	up
	1752	ENSG00000263412	0.402248	0.00245118	0.0277381	1.04593	NFE2L1-DT	NFE2L1-DT	up
	1753	ENSG00000107625	0.363765	0.00245684	0.0277546	0.958274	DDX50	DDX50	unchanged
	1754	ENSG00000185252	0.452135	0.00245449	0.0277546	1.15238	ZNF74	ZNF74	up
	1755	ENSG00000255384	2.27053	0.00245666	0.0277546	0.726047			unchanged
	1756	ENSG00000270504	2.03057	0.00246323	0.027811	4.90541			up
	1757	ENSG00000114942	0.395431	0.00246891	0.0278434	1.02982	EEF1B2	EEF1B2	up
	1758	ENSG00000234093	0.76299	0.00246834	0.0278434	1.8111	RPS15AP11	RPS15AP11	up
	1759	ENSG00000165288	0.49944	0.00247081	0.0278489	1.25644	BRWD3	BRWD3	up
	1760	ENSG00000255883	1.84637	0.00247485	0.0278786	3.81708	FUNDC2P1	FUNDC2P1	up
	1764	ENSG00000130921	0.273039	0.00248239	0.0279031	0.747563	MTRFR	MTRFR	unchanged
	1765	ENSG00000277170	1.37619	0.00248394	0.0279031	2.92862			up
	1766	ENSG00000146910	0.440178	0.00250578	0.0281312	1.12639	CNPY1	CNPY1	up
	1767	ENSG00000179523	0.622889	0.0025097	0.0281592	1.51925	EIF3J-DT	EIF3J-DT	up
	1768	ENSG00000224281	1.05627	0.00252492	0.028314	2.37172	SLC25A5-AS1	SLC25A5-AS1	up
	1770	ENSG00000267470	1.74071	0.00253356	0.0283787	3.62425	ZNF571-AS1	ZNF571-AS1	up
	1772	ENSG00000138385	0.212166	0.00254158	0.0284365	0.595823	SSB	SSB	unchanged
	1773	ENSG00000123612	1.32852	0.00254555	0.0284647	3.08539	ACVR1C	ACVR1C	up
	1774	ENSG00000255112	0.474363	0.00255136	0.0285016	1.19917	CHMP1B	CHMP1B	up
	1775	ENSG00000255213	1.00182	0.00255172	0.0285016	2.27445	NPM1P35	NPM1P35	up
	1777	ENSG00000153814	1.16737	0.00256738	0.0286327	2.70216	JAZF1	JAZF1	up
	1778	ENSG00000160229	1.06599	0.00257146	0.0286327	2.46592	ZNF66	ZNF66	up
	1780	ENSG00000268081	1.68948	0.00256814	0.0286327	3.62643			up
	1781	ENSG00000289393	0.49333	0.00257212	0.0286327	1.23722			up
	1782	ENSG00000229291	2.18643	0.00257724	0.0286709	0.930556	LINC02768	LINC02768	unchanged
	1783	ENSG00000237499	1.95839	0.00257844	0.0286709	4.25468	WAKMAR2	WAKMAR2	up
	1786	ENSG00000111679	1.38224	0.00259645	0.0288226	3.05346	PTPN6	PTPN6	up
	1788	ENSG00000259943	0.534999	0.0026155	0.0290016	1.32394	ZMPSTE24-DT	ZMPSTE24-DT	up
	1790	ENSG00000183569	1.65951	0.00263105	0.0291415	3.8801	SERHL2	SERHL2	up
	1791	ENSG00000253973	1.98179	0.00264298	0.0292573	4.66589	NRIP3-DT	NRIP3-DT	up
	1792	ENSG00000231028	2.38188	0.0026488	0.0293053	0.631402	LINC00271	AHI1-DT	unchanged
	1793	ENSG00000169564	0.414474	0.00265065	0.0293094	1.06739	PCBP1	PCBP1	up
	1794	ENSG00000230590	0.563	0.00265334	0.0293229	1.37968	FTX	FTX	up
	1795	ENSG00000229361	2.19613	0.00266374	0.0294214	0.934133	UBTFL7	UBTFL7	unchanged
	1797	ENSG00000163170	0.23421	0.00269854	0.0297726	0.646524	BOLA3	BOLA3	unchanged
	1799	ENSG00000100478	0.886104	0.00270693	0.0298154	2.05084	AP4S1	AP4S1	up
	1802	ENSG00000106245	0.250979	0.00271715	0.0298614	0.68642	BUD31	BUD31	unchanged
	1803	ENSG00000111879	0.529469	0.00271495	0.0298614	1.30655	FAM184A	FAM184A	up
	1804	ENSG00000144792	1.78942	0.00271681	0.0298614	3.50351	ZNF660	ZNF660	up
	1805	ENSG00000287574	2.09392	0.00271865	0.0298614	4.9774			up
	1807	ENSG00000101972	0.413608	0.00273571	0.029999	1.05737	STAG2	STAG2	up
	1809	ENSG00000152484	0.484309	0.00274416	0.030075	1.20875	USP12	USP12	up
	1811	ENSG00000233594	1.01837	0.0027578	0.0301912	2.27287	BTF3P5	BTF3P5	up
	1813	ENSG00000268584	1.2126	0.00277094	0.0303074	2.70078			up
	1815	ENSG00000262185	2.6813	0.00278419	0.0304129	0.535372	LINC02861	LINC02861	unchanged
	1817	ENSG00000196072	0.31055	0.00280704	0.0306287	0.828717	BLOC1S2	BLOC1S2	unchanged
	1818	ENSG00000199990	2.07409	0.00281175	0.0306632	4.19968	VTRNA1-1	VTRNA1-1	up
	1820	ENSG00000228013	2.38096	0.00282121	0.0307326	0.617194	IL6R-AS1	IL6R-AS1	unchanged
	1821	ENSG00000226279	1.31281	0.00282467	0.0307478	2.82015	RPL12P10	RPL12P10	up
	1822	ENSG00000289602	1.72182	0.0028257	0.0307478	3.27365			up
	1824	ENSG00000228649	0.483193	0.00284184	0.0308894	1.20144	SNHG26	SNHG26	up
	1826	ENSG00000124713	2.09468	0.00284949	0.0309387	4.93939	GNMT	GNMT	up
	1827	ENSG00000068976	2.28615	0.00286248	0.0310549	0.704397	PYGM	PYGM	unchanged
	1828	ENSG00000082438	1.13106	0.00286332	0.0310549	2.55157	COBLL1	COBLL1	up
	1831	ENSG00000170017	0.452821	0.00287594	0.0311406	1.13355	ALCAM	ALCAM	up
	1832	ENSG00000142408	1.4696	0.0028812	0.0311635	3.06718	CACNG8	CACNG8	up
	1833	ENSG00000288871	1.40702	0.00287985	0.0311635	3.09921			up
	1834	ENSG00000174695	0.357035	0.00289013	0.0312431	0.922933	TMEM167A	TMEM167A	unchanged
	1838	ENSG00000260643	2.56925	0.0029107	0.0313969	0.490601			unchanged
	1842	ENSG00000223583	1.0313	0.00293161	0.0315538	2.28853		RPL17P9	up
	1846	ENSG00000233360	2.32139	0.00295802	0.0317691	0.642881	PDXP-DT	PDXP-DT	unchanged
	1847	ENSG00000164031	0.6488	0.00297304	0.0319131	1.53463	DNAJB14	DNAJB14	up
	1851	ENSG00000227388	2.29373	0.00299926	0.0321385	0.876671			unchanged
	1853	ENSG00000289293	2.75748	0.00300438	0.032145	0.445327			unchanged
	1854	ENSG00000286366	2.13122	0.00300935	0.0321809	0.893622			unchanged
	1855	ENSG00000185477	1.38735	0.00301233	0.0321954	3.03177	GPRIN3	GPRIN3	up
	1856	ENSG00000081154	0.435861	0.00302669	0.0322818	1.08714	PCNP	PCNP	up
	1857	ENSG00000128340	2.03512	0.00302266	0.0322818	4.05914	RAC2	RAC2	up
	1859	ENSG00000277806	1.94765	0.00302629	0.0322818	4.15486			up
	1860	ENSG00000064102	0.304139	0.00303049	0.0323025	0.802429	INTS13	INTS13	unchanged
	1862	ENSG00000174145	2.52264	0.00304385	0.03241	0.52943	NWD2	NWD2	unchanged
	1863	ENSG00000009413	0.599628	0.0030496	0.0324538	1.4266	REV3L	REV3L	up
	1864	ENSG00000155975	0.533536	0.0030639	0.0325885	1.29275	VPS37A	VPS37A	up
	1865	ENSG00000166266	0.485581	0.00308168	0.03276	1.19215	CUL5	CUL5	up
	1866	ENSG00000225792	2.27278	0.00308823	0.032812	0.667063		SNX10-AS1	unchanged
	1868	ENSG00000228623	1.18112	0.00309799	0.0328715	2.63452	ZNF883	ZNF883	up
	1869	ENSG00000255717	0.404806	0.0030988	0.0328715	1.02114	SNHG1	SNHG1	up
	1870	ENSG00000258890	0.514887	0.00310308	0.0328993	1.25474	CEP95	CEP95	up
	1871	ENSG00000095596	0.973486	0.00310955	0.0329502	2.13193	CYP26A1	CYP26A1	up
	1872	ENSG00000148303	0.423458	0.003119	0.0329975	1.06081	RPL7A	RPL7A	up
	1874	ENSG00000282988	2.02821	0.00311692	0.0329975	4.60991			up
	1877	ENSG00000224094	0.769822	0.00312411	0.0330022	1.76601	RPS24P8	RPS24P8	up
	1878	ENSG00000072736	0.532915	0.0031322	0.0330659	1.28701	NFATC3	NFATC3	up
	1884	ENSG00000165650	0.424817	0.00315319	0.0331822	1.06258	PDZD8	PDZD8	up
	1886	ENSG00000103599	1.05711	0.00316541	0.0332604	2.34495	IQCH	IQCH	up
	1887	ENSG00000135913	0.707791	0.00316566	0.0332604	1.63705	USP37	USP37	up
	1888	ENSG00000148935	1.81181	0.00318368	0.033432	3.95442	GAS2	GAS2	up
	1891	ENSG00000122378	0.223487	0.00320168	0.0335322	0.608806	PRXL2A	PRXL2A	unchanged
	1892	ENSG00000214535	0.552994	0.00320131	0.0335322	1.32481	RPS15AP1	RPS15AP1	up
	1893	ENSG00000236976	1.23764	0.00320007	0.0335322	2.62681		RPL6P20	up
	1896	ENSG00000104361	2.62643	0.00322573	0.0337307	0.451045	NIPAL2	NIPAL2	unchanged
	1899	ENSG00000213885	0.720833	0.00324182	0.0338454	1.6516	RPL13AP7	RPL13AP7	up
	1900	ENSG00000011523	0.461017	0.00325919	0.0340088	1.1331	CEP68	CEP68	up
	1901	ENSG00000145912	0.221636	0.00326976	0.0340711	0.602207	NHP2	NHP2	unchanged
	1906	ENSG00000237125	1.3101	0.00328516	0.0341719	2.80882	HAND2-AS1	HAND2-AS1	up
	1910	ENSG00000225506	2.28008	0.00331167	0.034404	0.761258	CYP4A22-AS1	CYP4A22-AS1	unchanged
	1913	ENSG00000128463	0.440982	0.0033263	0.0344732	1.08818	EMC4	EMC4	up
	1914	ENSG00000115750	0.426758	0.00333541	0.0345495	1.05808	TAF1B	TAF1B	up
	1916	ENSG00000189229	0.809737	0.00334451	0.0345716	1.82498			up
	1917	ENSG00000255085	1.19564	0.00334372	0.0345716	2.59554			up
	1921	ENSG00000175455	0.46857	0.00338451	0.0349304	1.14496	CCDC14	CCDC14	up
	1923	ENSG00000289268	0.486172	0.00339515	0.0350038	1.1764			up
	1924	ENSG00000237190	0.271896	0.00340057	0.0350233	0.718737	CDKN2AIPNL	CDKN2AIPNL	unchanged
	1925	ENSG00000272948	1.37143	0.00339904	0.0350233	2.96141			up
	1926	ENSG00000248730	1.37759	0.00340405	0.0350408	2.98915	EGFLAM-AS4	EGFLAM-AS4	up
	1928	ENSG00000242114	0.512597	0.00342019	0.0351705	1.22388	MTFP1	MTFP1	up
	1929	ENSG00000135776	0.394021	0.00343111	0.0352462	0.986043	ABCB10	ABCB10	unchanged
	1930	ENSG00000274528	2.3943	0.00343288	0.0352462	0.726311			unchanged
	1931	ENSG00000279696	2.80744	0.00342963	0.0352462	0.400532			unchanged
	1932	ENSG00000157538	0.332108	0.00344741	0.0353769	0.851505	VPS26C	VPS26C	unchanged
	1934	ENSG00000240399	2.10942	0.00345653	0.0354339	0.950832			unchanged
	1936	ENSG00000183718	1.39062	0.00346311	0.0354464	2.94778	TRIM52	TRIM52	up
	1937	ENSG00000214760	1.53507	0.00346272	0.0354464	3.38084	RPL21P1	RPL21P1	up
	1939	ENSG00000232593	0.717057	0.00348016	0.0355841	1.63242	KANTR	KANTR	up
	1940	ENSG00000241464	1.65937	0.00348667	0.0356139	3.27924	RPL39P38	RPL39P38	up
	1941	ENSG00000272341	1.99174	0.00348577	0.0356139	4.3101			up
	1943	ENSG00000182916	2.3065	0.00349984	0.0357117	0.626259	TCEAL7	TCEAL7	unchanged
	1945	ENSG00000163462	1.70592	0.00351128	0.0357916	3.53476	TRIM46	TRIM46	up
	1946	ENSG00000110092	0.655062	0.00351459	0.0358069	1.5097	CCND1	CCND1	up
	1948	ENSG00000078795	1.8368	0.003524	0.0358475	3.36755	PKD2L2	PKD2L2	up
	1950	ENSG00000166428	1.98299	0.00352779	0.0358493	4.29773	PLD4	PLD4	up
	1951	ENSG00000259736	2.07051	0.00352628	0.0358493	0.997613	CRTC3-AS1	CRTC3-AS1	unchanged
	1952	ENSG00000274652	2.58001	0.00353237	0.0358775	0.485884			unchanged
	1954	ENSG00000105894	2.06892	0.0035811	0.0363352	4.5408	PTN	PTN	up
	1955	ENSG00000152291	0.332512	0.00358669	0.0363547	0.849361	TGOLN2	TGOLN2	unchanged
	1956	ENSG00000243431	1.14449	0.00358558	0.0363547	2.38667	RPL5P30	RPL5P30	up
	1957	ENSG00000278175	1.03315	0.00359148	0.0363846	2.20943	GLIDR	GLIDR	up
	1958	ENSG00000113494	1.79951	0.00360101	0.0364226	3.82429	PRLR	PRLR	up
	1960	ENSG00000158764	2.18152	0.00360257	0.0364226	0.749417	ITLN2	ITLN2	unchanged
	1961	ENSG00000175324	0.33249	0.00359803	0.0364226	0.846743	LSM1	LSM1	unchanged
	1969	ENSG00000175110	0.496858	0.00365642	0.0368299	1.19023	MRPS22	MRPS22	up
	1974	ENSG00000235613	1.88842	0.00367876	0.0369622	3.56603	NSRP1P1	NSRP1P1	up
	1975	ENSG00000214194	0.383176	0.00371329	0.0372758	0.955319	SMIM30	SMIM30	unchanged
	1976	ENSG00000153936	0.404845	0.00373286	0.0373399	0.998019	HS2ST1	HS2ST1	unchanged
	1978	ENSG00000213713	2.61968	0.00372824	0.0373399	0.481468	PIGCP1	PIGCP1	unchanged
	1979	ENSG00000226491	2.00743	0.00372262	0.0373399	4.26646	FTOP1	FTOP1	up
	1980	ENSG00000234062	2.18701	0.0037301	0.0373399	0.722043			unchanged
	1981	ENSG00000271933	2.42952	0.00373074	0.0373399	0.525014			unchanged
	1982	ENSG00000272425	3.35394	0.00373285	0.0373399	0.292857			unchanged
	1984	ENSG00000115364	0.423196	0.00374517	0.0374253	1.03603	MRPL19	MRPL19	up
	1985	ENSG00000153317	0.326658	0.0037513	0.0374487	0.831584	ASAP1	ASAP1	unchanged
	1986	ENSG00000206557	0.403009	0.00374991	0.0374487	0.993613	TRIM71	TRIM71	unchanged
	1987	ENSG00000229278	2.0326	0.00376373	0.0375162	4.3542			up
	1988	ENSG00000255121	1.97056	0.00376243	0.0375162	3.62263	CENATAC-DT	CENATAC-DT	up
	1989	ENSG00000274925	1.64548	0.00376361	0.0375162	3.32125	ZKSCAN2-DT	ZKSCAN2-DT	up
	1990	ENSG00000091436	0.555374	0.00378346	0.0376568	1.29556	MAP3K20	MAP3K20	up
	1991	ENSG00000122484	0.637918	0.00378675	0.0376568	1.45812	RPAP2	RPAP2	up
	1992	ENSG00000133104	0.257607	0.00378724	0.0376568	0.677377	SPART	SPART	unchanged
	1994	ENSG00000272807	2.50568	0.00378734	0.0376568	0.514401			unchanged
	1995	ENSG00000065615	0.507695	0.00379128	0.0376595	1.20326	CYB5R4	CYB5R4	up
	1998	ENSG00000272844	1.8993	0.00379644	0.0376718	3.93768			up
	1999	ENSG00000148950	0.490218	0.00380184	0.0377065	1.16786	IMMP1L	IMMP1L	up
	2001	ENSG00000178928	1.50858	0.0038167	0.037816	2.70085	TPRX1	TPRX1	up
	2006	ENSG00000213316	2.15619	0.00383221	0.0378751	0.951908	LTC4S	LTC4S	unchanged
	2009	ENSG00000182621	0.48166	0.00384341	0.0379291	1.14965	PLCB1	PLCB1	up
	2010	ENSG00000289115	2.30335	0.00384561	0.0379318	0.631821			unchanged
	2013	ENSG00000106780	0.691395	0.00389599	0.0383335	1.55182	MEGF9	MEGF9	up
	2018	ENSG00000182389	0.820989	0.00390918	0.0384061	1.79589	CACNB4	CACNB4	up
	2021	ENSG00000125355	2.05923	0.0039435	0.0386814	1.02096	TMEM255A	TMEM255A	up
	2022	ENSG00000126562	1.60655	0.00394543	0.0386814	2.88108	WNK4	WNK4	up
	2023	ENSG00000259663	0.931816	0.00394696	0.0386814	1.98192	ISL1-DT	ISL1-DT	up
	2024	ENSG00000283064	2.45966	0.0039555	0.038746	0.534674			unchanged
	2025	ENSG00000101624	0.776518	0.00395836	0.0387548	1.70861	CEP76	CEP76	up
	2026	ENSG00000272097	2.21109	0.00397607	0.0389089	0.703851	TMEM14B-DT	TMEM14B-DT	unchanged
	2027	ENSG00000124098	0.369678	0.00398004	0.0389286	0.917758	FAM210B	FAM210B	unchanged
	2029	ENSG00000239149	1.89249	0.00398728	0.0389622	3.83926	SNORA59A	SNORA59B	up
	2030	ENSG00000267530	2.11899	0.00399397	0.0390071	0.826623	LINC01836	LINC01836	unchanged
	2031	ENSG00000217027	0.861471	0.00400077	0.0390543	1.85137	TPT1P4	TPT1P4	up
	2032	ENSG00000171827	0.795034	0.00400379	0.0390646	1.73568	ZNF570	ZNF570	up
	2033	ENSG00000281912	2.16132	0.00401085	0.0391141	0.761287	LINC01144	LINC01144	unchanged
	2034	ENSG00000212664	1.08868	0.00401447	0.0391228	2.30314		RPL17P39	up
	2035	ENSG00000281468	2.32235	0.00401568	0.0391228	0.609065			unchanged
	2036	ENSG00000169083	0.47437	0.00402081	0.0391535	1.12547	AR	AR	up
	2037	ENSG00000243406	1.98732	0.00402279	0.0391536	4.1083	MRPS31P5	MRPS31P5	up
	2039	ENSG00000224842	1.22875	0.00404094	0.0392917	2.49462			up
	2043	ENSG00000102547	1.14074	0.00407926	0.0395672	2.36817	CAB39L	CAB39L	up
	2047	ENSG00000136628	0.316784	0.00412122	0.0399156	0.801819	EPRS1	EPRS1	unchanged
	2049	ENSG00000261335	2.16203	0.00413539	0.0400138	0.73137		LOC105274304	unchanged
	2050	ENSG00000074603	0.355515	0.00413747	0.0400144	0.883661	DPP8	DPP8	unchanged
	2051	ENSG00000271860	1.25356	0.00414118	0.0400307	2.49184		LOC101927314	up
	2052	ENSG00000116539	0.444329	0.0041498	0.0400807	1.06321	ASH1L	ASH1L	up
	2058	ENSG00000126070	0.430216	0.00420971	0.0405191	1.03307	AGO3	AGO3	up
	2059	ENSG00000231925	0.882513	0.00420845	0.0405191	1.87468	TAPBP	TAPBP	up
	2060	ENSG00000287705	1.4812	0.00421009	0.0405191	2.84466			up
	2061	ENSG00000164902	0.305451	0.00421772	0.0405728	0.777386	PHAX	PHAX	unchanged
	2062	ENSG00000224358	2.38396	0.00422274	0.0406014	0.546591	TMCO1-AS1	TMCO1-AS1	unchanged
	2063	ENSG00000278794	0.934444	0.00422864	0.0406384	1.97207	Metazoa_SRP	Metazoa_SRP	up
	2068	ENSG00000259723	2.63456	0.00428367	0.0410677	0.459938			unchanged
	2072	ENSG00000196352	0.352804	0.00430625	0.0412045	0.872742	CD55	CD55	unchanged
	2073	ENSG00000277767	2.02177	0.00430875	0.0412085	1.06508			up
	2075	ENSG00000112851	0.328045	0.0043307	0.0413786	0.819596	ERBIN	ERBIN	unchanged
	2076	ENSG00000224505	1.4763	0.004344	0.0414856	2.8141			up
	2079	ENSG00000071189	0.302453	0.00436141	0.0415081	0.763877	SNX13	SNX13	unchanged
	2081	ENSG00000136160	2.00508	0.00436396	0.0415081	4.02156	EDNRB	EDNRB	up
	2082	ENSG00000173588	0.735499	0.00435746	0.0415081	1.59965	CEP83	CEP83	up
	2084	ENSG00000250182	0.718009	0.00436078	0.0415081	1.57193	EEF1A1P13	EEF1A1P13	up
	2085	ENSG00000288750	1.24447	0.0043644	0.0415081	2.52247			up
	2088	ENSG00000135414	0.444541	0.00442086	0.041977	1.05534	GDF11	GDF11	up
	2089	ENSG00000255836	0.872501	0.00442648	0.0420102	1.83262		LOC100419928	up
	2092	ENSG00000259469	2.72492	0.00447716	0.0424303	0.435071			unchanged
	2093	ENSG00000261064	1.97469	0.00448157	0.0424518	3.39017	LINC02256	LINC02256	up
	2094	ENSG00000111728	1.43095	0.00448592	0.0424727	2.85796	ST8SIA1	ST8SIA1	up
	2095	ENSG00000138083	0.526778	0.00450607	0.0426342	1.20848	SIX3	SIX3	up
	2096	ENSG00000267383	0.887734	0.00450943	0.0426342	1.87251			up
	2097	ENSG00000289183	1.73543	0.00450873	0.0426342	3.25244			up
	2100	ENSG00000289152	2.45954	0.00452657	0.0427351	0.505531			unchanged
	2102	ENSG00000119900	0.392219	0.00455795	0.042955	0.946345	OGFRL1	OGFRL1	unchanged
	2103	ENSG00000122025	1.73192	0.00455852	0.042955	3.1744	FLT3	FLT3	up
	2108	ENSG00000187231	0.603937	0.00458847	0.0431552	1.3512	SESTD1	SESTD1	up
	2109	ENSG00000106052	0.333322	0.00460371	0.0432369	0.825282	TAX1BP1	TAX1BP1	unchanged
	2111	ENSG00000248578	1.17497	0.00460264	0.0432369	2.34387	NPM1P21	NPM1P21	up
	2112	ENSG00000288774	1.85661	0.00462348	0.043402	3.57714			up
	2113	ENSG00000207751	1.64801	0.00463763	0.0435143	2.6596			up
	2114	ENSG00000138443	0.344609	0.00464448	0.0435579	0.848531	ABI2	ABI2	unchanged
	2115	ENSG00000104231	0.402542	0.00464711	0.043562	0.965069	ZFAND1	ZFAND1	unchanged
	2119	ENSG00000196415	2.05575	0.00469476	0.0439255	0.863136	PRTN3	PRTN3	unchanged
	2121	ENSG00000109084	0.198979	0.00470337	0.0439445	0.526341	TMEM97	TMEM97	unchanged
	2122	ENSG00000250049	2.12537	0.00470343	0.0439445	0.765519			unchanged
	2123	ENSG00000137992	0.758541	0.00470847	0.0439501	1.62563	DBT	DBT	up
	2124	ENSG00000233622	1.63577	0.00470692	0.0439501	3.13374	CYP2T1P	CYP2T1P	up
	2127	ENSG00000286152	2.98705	0.00473527	0.044138	0.389595			unchanged
	2129	ENSG00000182774	0.284043	0.00476382	0.0443	0.714168	RPS17	RPS17	unchanged
	2131	ENSG00000251363	0.519765	0.00475705	0.0443	1.18569	LINC02315	LINC02315	up
	2132	ENSG00000288573	2.50376	0.00476109	0.0443	0.471855			unchanged
	2134	ENSG00000240063	2.46715	0.0047905	0.0445063	0.505452			unchanged
	2135	ENSG00000182327	2.66867	0.00479291	0.0445078	0.409067	GLTPD2	GLTPD2	unchanged
	2136	ENSG00000257159	3.13791	0.00479868	0.0445406	0.29362			unchanged
	2138	ENSG00000231093	1.54532	0.00480209	0.0445444	2.85439	TRMT1P1	TRMT1P1	up
	2139	ENSG00000196236	0.347468	0.00482931	0.0447411	0.847962	XPNPEP3	XPNPEP3	unchanged
	2140	ENSG00000286813	2.38833	0.0048286	0.0447411	0.539055			unchanged
	2141	ENSG00000170085	0.644993	0.0048426	0.0448433	1.41148	SIMC1	SIMC1	up
	2142	ENSG00000267011	1.88556	0.00484936	0.0448849	3.49997			up
	2143	ENSG00000182902	1.13831	0.0048568	0.0449328	2.28111	SLC25A18	SLC25A18	up
	2144	ENSG00000264334	0.722781	0.00486301	0.0449692	1.55108			up
	2149	ENSG00000185177	3.2766	0.00491488	0.045338	0.301361	ZNF479	ZNF479	unchanged
	2150	ENSG00000226674	1.50421	0.00491503	0.045338	2.94271	TEX41	TEX41	up
	2151	ENSG00000237037	0.991538	0.0049189	0.045338	1.988	NDUFA6-DT	NDUFA6-DT	up
	2152	ENSG00000104218	0.466746	0.0049237	0.045351	1.08135	CSPP1	CSPP1	up
	2153	ENSG00000175161	0.753981	0.00492488	0.045351	1.59674	CADM2	CADM2	up
	2154	ENSG00000119862	0.511238	0.00492978	0.0453751	1.16461	LGALSL	LGALSL	up
	2156	ENSG00000234432	1.63735	0.00493707	0.0454	3.0384		LINC02983	up
	2157	ENSG00000283020	1.48205	0.00494437	0.045446	2.8877	DUX4L37	DUX4L37	up
	2158	ENSG00000169018	0.463129	0.00494991	0.0454759	1.07435	FEM1B	FEM1B	up
	2161	ENSG00000185634	1.7345	0.00496493	0.0455529	3.28628	SHC4	SHC4	up
	2165	ENSG00000287146	2.58539	0.00501244	0.0459014	0.454696			unchanged
	2167	ENSG00000164975	0.299943	0.00502609	0.045984	0.744553	SNAPC3	SNAPC3	unchanged
	2168	ENSG00000242951	0.814134	0.00503061	0.0460041	1.69946			up
	2174	ENSG00000198677	0.493563	0.00507005	0.0462368	1.12675	TTC37	TTC37	up
	2181	ENSG00000196715	0.378793	0.00510398	0.0464104	0.9063	VKORC1L1	VKORC1L1	unchanged
	2182	ENSG00000257242	3.05243	0.00511033	0.0464332	0.361032	LINC01619	LINC01619	unchanged
	2184	ENSG00000170759	0.316426	0.00512816	0.0465313	0.780374	KIF5B	KIF5B	unchanged
	2185	ENSG00000272142	2.09655	0.00512572	0.0465313	0.76891	LYRM4-AS1	LYRM4-AS1	unchanged
	2186	ENSG00000164744	2.22937	0.00515407	0.046745	0.624538	SUN3	SUN3	unchanged
	2190	ENSG00000245888	1.48534	0.00517826	0.0468786	2.74286	NSMCE1-DT	NSMCE1-DT	up
	2192	ENSG00000169856	1.81864	0.00522824	0.0472879	2.9873	ONECUT1	ONECUT1	up
	2197	ENSG00000221949	1.91899	0.00524367	0.0473522	3.44372	LINC01465	LINC01465	up
	2198	ENSG00000248746	1.97688	0.00524404	0.0473522	3.21072	ACTN3	ACTN3	up
	2199	ENSG00000136560	0.635864	0.00525822	0.0473646	1.37633	TANK	TANK	up
	2203	ENSG00000170802	0.683542	0.00526815	0.0474047	1.45905	FOXN2	FOXN2	up
	2205	ENSG00000067715	0.915077	0.00529145	0.0475694	1.85385	SYT1	SYT1	up
	2206	ENSG00000161610	1.99911	0.00529296	0.0475694	0.929896	HCRT	HCRT	unchanged
	2210	ENSG00000197969	0.406852	0.0053083	0.047621	0.955943	VPS13A	VPS13A	unchanged
	2212	ENSG00000228175	2.20619	0.00532614	0.0477379	0.647299	GEMIN8P4	GEMIN8P4	unchanged
	2218	ENSG00000259803	0.608994	0.0053756	0.0480507	1.31723	SLC22A31	SLC22A31	up
	2219	ENSG00000168958	0.481103	0.00538047	0.0480516	1.09353	MFF	MFF	up
	2224	ENSG00000143458	0.627563	0.00540077	0.0481455	1.35546	GABPB2	GABPB2	up
	2230	ENSG00000188725	0.758217	0.00546596	0.0485956	1.51965	SMIM15	SMIM15	up
	2231	ENSG00000135049	0.290849	0.0054701	0.0486106	0.720378	AGTPBP1	AGTPBP1	unchanged
	2232	ENSG00000175471	1.70163	0.00547309	0.0486154	2.78977	MCTP1	MCTP1	up
	2233	ENSG00000185942	0.891146	0.00549078	0.0487507	1.80526	NKAIN3	NKAIN3	up
	2238	ENSG00000091317	0.509627	0.00555355	0.0491978	1.14107	CMTM6	CMTM6	up
	2239	ENSG00000271133	1.34988	0.00556304	0.0492599	2.5418	ITGB8-AS1	ITGB8-AS1	up
	2240	ENSG00000105877	1.53948	0.00556935	0.0492726	2.88553	DNAH11	DNAH11	up
	2241	ENSG00000233189	1.20225	0.00556945	0.0492726	2.2372	RPL12P29	RPL12P29	up
	2244	ENSG00000288552	0.798358	0.00564738	0.0498953	1.61295			up

## Sheet: 2S1B
Category Term Count % PValue Genes List Total Pop Hits Pop Total Fold Enrichment Bonferroni Benjamini FDR
GOTERM_BP_DIRECT GO:0051301~cell division 15 6.666666666666667 1.701452946727817E-5 USP37, USP16, SYCP2, HMGA2, HAUS6, SMC4, ASPM, CENPE, SGO2, CDK6, KIF2A, TPR, CNTRL, NEK1, LRRCC1 184 383 19416 4.132705187876036 0.019309944313924743 0.019498650769500782 0.019498650769500782
GOTERM_BP_DIRECT GO:0000082~G1/S transition of mitotic cell cycle 7 3.111111111111111 1.166795877757729E-4 TRIM71, USP37, CDK6, CUL5, BCL2, BCAT1, CUL4B 184 81 19416 9.119162640901772 0.12516729841356056 0.06685740379551787 0.06685740379551787
GOTERM_BP_DIRECT GO:0090316~positive regulation of intracellular protein transport 4 1.7777777777777777 0.0014408883668391053 PCM1, ICE1, TPR, CEP290 184 24 19416 17.586956521739133 0.8084198177375077 0.41281451709940364 0.41281451709940364
GOTERM_BP_DIRECT GO:0071539~protein localization to centrosome 4 1.7777777777777777 0.0014408883668391053 PCM1, CCDC14, CEP83, CEP78 184 24 19416 17.586956521739133 0.8084198177375077 0.41281451709940364 0.41281451709940364
GOTERM_BP_DIRECT GO:0006355~regulation of DNA-templated transcription 19 8.444444444444445 0.004147431138632854 ZNF100, ZNF570, ZNF480, ATRX, POU6F2, HMGA2, ZNF66, ASH1L, CCAR1, ZNF33B, ZNF33A, ZNF91, ZNF37A, ZNF716, ZNF208, ZNF569, ZNF426, ZNF675, ZNF431 184 957 19416 2.0949979555676705 0.991458679869631 0.9505912169746502 0.9505912169746502
GOTERM_BP_DIRECT GO:0060271~cilium assembly 8 3.5555555555555554 0.007186259102099859 OFD1, PCM1, ONECUT2, NEK1, CEP83, DZIP1, CEP290, CILK1 184 236 19416 3.5770081061164336 0.999742679074505 1.0 1.0
GOTERM_BP_DIRECT GO:0007018~microtubule-based movement 5 2.2222222222222223 0.007229456986757022 CENPE, KIF18A, KIF2A, KIF15, KTN1 184 81 19416 6.513687600644122 0.999755195519448 1.0 1.0
GOTERM_BP_DIRECT GO:0072520~seminiferous tubule development 3 1.3333333333333335 0.010948666092985225 AR, KIF18A, ATRX 184 17 19416 18.621483375959077 0.9999966827162168 1.0 1.0
GOTERM_BP_DIRECT GO:0045724~positive regulation of cilium assembly 3 1.3333333333333335 0.018033048203352775 CCDC88A, MNS1, DZIP1 184 22 19416 14.389328063241106 0.9999999991229687 1.0 1.0
GOTERM_BP_DIRECT GO:0140706~protein-containing complex localization to centriolar satellite 2 0.8888888888888888 0.01876207881486001 PCM1, DZIP1 184 2 19416 105.52173913043478 0.9999999996255663 1.0 1.0
GOTERM_BP_DIRECT GO:0050900~leukocyte migration 3 1.3333333333333335 0.02475630060600496 YES1, ROCK1, SOS1 184 26 19416 12.175585284280936 0.999999999999666 1.0 1.0
GOTERM_BP_DIRECT GO:0007264~small GTPase-mediated signal transduction 5 2.2222222222222223 0.027685462415625386 CCDC88A, USO1, CHML, SOS1, RHOQ 184 121 19416 4.360402443406396 0.9999999999999893 1.0 1.0
GOTERM_BP_DIRECT GO:0007140~male meiotic nuclear division 3 1.3333333333333335 0.030364017751089552 KIF18A, SYCP2, TEX15 184 29 19416 10.916041979010494 0.9999999999999996 1.0 1.0
GOTERM_BP_DIRECT GO:0071108~protein K48-linked deubiquitination 3 1.3333333333333335 0.0323348054399671 USP8, USP37, MINDY2 184 30 19416 10.552173913043479 1.0 1.0 1.0
GOTERM_BP_DIRECT GO:0006357~regulation of transcription by RNA polymerase II 25 11.11111111111111 0.033822685269754175 PHF3, USP16, ZNF570, ONECUT2, ZNF66, RPAP2, ZNF829, ZNF605, ZNF208, SIX3, MXI1, ZNF569, ZNF426, ZNF883, ZNF100, ZNF480, POU6F2, ZNF33B, ZNF33A, ZNF91, ZNF37A, ZNF716, SOS1, ZNF510, BRWD3 184 1721 19416 1.5328550135159031 1.0 1.0 1.0
GOTERM_BP_DIRECT GO:0048808~male genitalia morphogenesis 2 0.8888888888888888 0.03717402967430166 AR, SYCP2 184 4 19416 52.76086956521739 1.0 1.0 1.0
GOTERM_BP_DIRECT GO:0031297~replication fork processing 3 1.3333333333333335 0.04744043607997325 MMS22L, BOD1L1, ATRX 184 37 19416 8.555816686251468 1.0 1.0 1.0
GOTERM_BP_DIRECT GO:0033077~T cell differentiation in thymus 3 1.3333333333333335 0.05214637010420853 CDK6, BCL2, NKAP 184 39 19416 8.117056856187292 1.0 1.0 1.0
GOTERM_BP_DIRECT GO:0051661~maintenance of centrosome location 2 0.8888888888888888 0.05524235124109594 ASPM, AKAP9 184 6 19416 35.173913043478265 1.0 1.0 1.0
GOTERM_BP_DIRECT GO:1903566~positive regulation of protein localization to cilium 2 0.8888888888888888 0.05524235124109594 CCDC88A, DZIP1 184 6 19416 35.173913043478265 1.0 1.0 1.0
GOTERM_BP_DIRECT GO:0007010~cytoskeleton organization 5 2.2222222222222223 0.05940571367565647 ARHGAP21, DST, PALLD, CDC42BPA, BRWD3 184 155 19416 3.4039270687237027 1.0 1.0 1.0
GOTERM_BP_DIRECT GO:0006275~regulation of DNA replication 3 1.3333333333333335 0.06458962982788528 USP37, INO80D, ESCO1 184 44 19416 7.194664031620553 1.0 1.0 1.0
GOTERM_BP_DIRECT GO:0090307~mitotic spindle assembly 3 1.3333333333333335 0.0698189419167245 KIF2A, MAP9, KIF15 184 46 19416 6.881852551984877 1.0 1.0 1.0
GOTERM_BP_DIRECT GO:0140058~neuron projection arborization 2 0.8888888888888888 0.07297342222180242 ROCK1, VPS13A 184 8 19416 26.380434782608695 1.0 1.0 1.0
GOTERM_BP_DIRECT GO:0006511~ubiquitin-dependent protein catabolic process 6 2.666666666666667 0.07322008333835744 ANKIB1, CUL5, UBE2R2, TTC3, CUL4B, CCAR1 184 236 19416 2.682756079587325 1.0 1.0 1.0
GOTERM_BP_DIRECT GO:0006974~DNA damage response 7 3.111111111111111 0.07563001370997481 SLF1, USP16, BOD1L1, BCL2, XIAP, SMC6, CUL4B 184 312 19416 2.36747491638796 1.0 1.0 1.0
GOTERM_BP_DIRECT GO:0000724~double-strand break repair via homologous recombination 4 1.7777777777777777 0.07703111079614253 MMS22L, SLF1, REV3L, SMC6 184 105 19416 4.019875776397515 1.0 1.0 1.0
GOTERM_BP_DIRECT GO:0031122~cytoplasmic microtubule organization 3 1.3333333333333335 0.07791089465963051 CCDC88A, PCM1, TRDN 184 49 19416 6.4605146406388645 1.0 1.0 1.0
GOTERM_BP_DIRECT GO:0000209~protein polyubiquitination 5 2.2222222222222223 0.08026255637888519 TRIM71, ANKIB1, UBE2R2, BCL2, CUL4B 184 172 19416 3.0674924165824065 1.0 1.0 1.0
GOTERM_BP_DIRECT GO:0035264~multicellular organism growth 4 1.7777777777777777 0.08048506291781078 AR, ATRX, VPS13A, SOS1 184 107 19416 3.9447379114181227 1.0 1.0 1.0
GOTERM_BP_DIRECT GO:1903140~regulation of establishment of endothelial barrier 2 0.8888888888888888 0.08171444982584154 ROCK1, PLCB1 184 9 19416 23.44927536231884 1.0 1.0 1.0
GOTERM_BP_DIRECT GO:0016579~protein deubiquitination 4 1.7777777777777777 0.08578986823399154 USP8, USP37, USP16, USP6 184 110 19416 3.837154150197628 1.0 1.0 1.0
GOTERM_BP_DIRECT GO:0031334~positive regulation of protein-containing complex assembly 3 1.3333333333333335 0.08628031178066609 SLF1, ICE1, TRABD2A 184 52 19416 6.087792642140468 1.0 1.0 1.0
GOTERM_BP_DIRECT GO:2000177~regulation of neural precursor cell proliferation 2 0.8888888888888888 0.09037350355073616 TRIM71, SIX3 184 10 19416 21.104347826086954 1.0 1.0 1.0
GOTERM_BP_DIRECT GO:0016925~protein sumoylation 3 1.3333333333333335 0.09200331566207896 RANBP2, SLF1, SMC6 184 54 19416 5.86231884057971 1.0 1.0 1.0
GOTERM_BP_DIRECT GO:2000672~negative regulation of motor neuron apoptotic process 2 0.8888888888888888 0.09895134797192746 ROCK1, BCL2 184 11 19416 19.18577075098814 1.0 1.0 1.0

## Sheet: 2S1C
Category Term Count % PValue Genes List Total Pop Hits Pop Total Fold Enrichment Bonferroni Benjamini FDR
INTERPRO IPR050169:Krueppel_C2H2_ZnF 15 6.666666666666667 3.556922411743599E-6 ZNF100, ZNF570, ZNF480, ZNF66, ZNF33B, ZNF33A, ZNF91, ZNF37A, ZNF716, ZNF605, ZNF208, ZNF569, ZNF426, ZNF675, ZNF431 197 331 20667 4.754167497354579 0.0023270764727220117 9.942013690945758E-4 9.911656397232945E-4
INTERPRO IPR036051:KRAB_dom_sf 17 7.555555555555555 4.14448131970044E-6 ZNF100, ZNF570, ZNF480, ZNF66, ZNF33B, ZNF33A, ZNF829, ZNF91, ZNF37A, ZNF716, ZNF605, ZNF208, ZNF569, ZNF426, ZNF675, ZNF510, ZNF431 197 434 20667 4.109324194718005 0.0027109595841042777 9.942013690945758E-4 9.911656397232945E-4
INTERPRO IPR001909:KRAB 17 7.555555555555555 4.5535940569217204E-6 ZNF100, ZNF570, ZNF480, ZNF66, ZNF33B, ZNF33A, ZNF829, ZNF91, ZNF37A, ZNF716, ZNF605, ZNF208, ZNF569, ZNF426, ZNF675, ZNF510, ZNF431 197 437 20667 4.0811137311387045 0.0029781673331175096 9.942013690945758E-4 9.911656397232945E-4
INTERPRO IPR036236:Znf_C2H2_sf 21 9.333333333333334 7.432978510378067E-5 ZNF100, ZNF570, ZNF480, ZNF66, ZNF33B, ZNF33A, ZNF829, ZNF91, ZNF37A, ZNF716, ZNF638, ZNF605, DNAJC21, ZNF208, ZNF569, ZNF426, DZIP1, ZNF675, ZNF510, ZNF883, ZNF431 197 797 20667 2.764217337859613 0.047521570796241974 0.012171502310744084 0.012134337418192193
INTERPRO IPR013087:Znf_C2H2_type 21 9.333333333333334 1.2649751828470472E-4 ZNF100, ZNF570, ZNF480, ZNF66, ZNF33B, ZNF33A, ZNF829, ZNF91, ZNF37A, ZNF716, ZNF638, ZNF605, DNAJC21, ZNF208, ZNF569, ZNF426, DZIP1, ZNF675, ZNF510, ZNF883, ZNF431 197 829 20667 2.657516547978422 0.0795210213480173 0.016571174895296317 0.016520575887982437
INTERPRO IPR050185:Ub_carboxyl-term_hydrolase 4 1.7777777777777777 0.0034026443139776198 USP8, USP37, USP16, USP6 197 32 20667 13.113578680203045 0.8927435346764943 0.3714553376092235 0.3703211228378976
INTERPRO IPR001752:Kinesin_motor_dom 4 1.7777777777777777 0.008897150326965805 CENPE, KIF18A, KIF2A, KIF15 197 45 20667 9.325211505922166 0.9971307738896413 0.8325190663089431 0.8299770233583815
INTERPRO IPR002110:Ankyrin_rpt 8 3.5555555555555554 0.014177770608518433 ANKRD36C, ANKRD26, SLF1, GABPB2, ANKIB1, ANKRD12, ANKRD20A8P, UACA 197 268 20667 3.1316008788544583 0.999913286343046 1.0 0.9984709480122325
INTERPRO IPR036770:Ankyrin_rpt-contain_sf 8 3.5555555555555554 0.01587947014705883 ANKRD36C, ANKRD26, SLF1, GABPB2, ANKIB1, ANKRD12, ANKRD20A8P, UACA 197 274 20667 3.0630256771277184 0.9999720339513515 1.0 0.9984709480122325
INTERPRO IPR000719:Prot_kinase_dom 11 4.888888888888889 0.021319592163884574 MAP3K2, CSNK1G3, SBK1, YES1, CDK6, ACVR1C, ROCK1, RYK, NEK1, CDC42BPA, CILK1 197 500 20667 2.307989847715736 0.9999992590553701 1.0 0.9984709480122325
INTERPRO IPR039497:CC144C-like_CC_dom 3 1.3333333333333335 0.03071810579808186 ANKRD36C, ANKRD26, ANKRD20A8P 197 29 20667 10.852616838788729 0.9999999986670443 1.0 0.9984709480122325
INTERPRO IPR008271:Ser/Thr_kinase_AS 8 3.5555555555555554 0.03137705061475556 CSNK1G3, SBK1, CDK6, ACVR1C, ROCK1, NEK1, CDC42BPA, CILK1 197 316 20667 2.6559146694082116 0.9999999991461842 1.0 0.9984709480122325
INTERPRO IPR017441:Protein_kinase_ATP_BS 9 4.0 0.03346071564394393 MAP3K2, CSNK1G3, YES1, CDK6, ACVR1C, ROCK1, NEK1, CDC42BPA, CILK1 197 391 20667 2.414776636763732 0.9999999997916569 1.0 0.9984709480122325
INTERPRO IPR018200:USP_CS 4 1.7777777777777777 0.03447539397474426 USP8, USP37, USP16, USP6 197 75 20667 5.595126903553299 0.9999999998952892 1.0 0.9984709480122325
INTERPRO IPR011009:Kinase-like_dom_sf 11 4.888888888888889 0.035474664813131024 MAP3K2, CSNK1G3, SBK1, YES1, CDK6, ACVR1C, ROCK1, RYK, NEK1, CDC42BPA, CILK1 197 545 20667 2.11742187863829 0.9999999999468585 1.0 0.9984709480122325
INTERPRO IPR001394:Peptidase_C19_UCH 4 1.7777777777777777 0.03929252726383391 USP8, USP37, USP16, USP6 197 79 20667 5.311829338816423 0.9999999999960444 1.0 0.9984709480122325
INTERPRO IPR027640:Kinesin-like_fam 3 1.3333333333333335 0.04116254376069686 CENPE, KIF18A, KIF2A 197 34 20667 9.256643774260974 0.999999999998896 1.0 0.9984709480122325
INTERPRO IPR028889:USP_dom 4 1.7777777777777777 0.04182257616699777 USP8, USP37, USP16, USP6 197 81 20667 5.180673058845647 0.9999999999992968 1.0 0.9984709480122325
INTERPRO IPR036872:CH_dom_sf 4 1.7777777777777777 0.04443271561319274 ASPM, CCDC88A, DST, CEP95 197 83 20667 5.055837563451777 0.9999999999998822 1.0 0.9984709480122325
INTERPRO IPR036961:Kinesin_motor_dom_sf 4 1.7777777777777777 0.04576758657441866 CENPE, KIF18A, KIF2A, KIF15 197 84 20667 4.995649021029732 0.9999999999999528 1.0 0.9984709480122325
INTERPRO IPR050657:Ankyrin_repeat_domain 3 1.3333333333333335 0.050334995364239216 ANKRD36C, ANKRD26, ANKRD20A8P 197 38 20667 8.282260219075608 0.999999999999998 1.0 0.9984709480122325
INTERPRO IPR027417:P-loop_NTPase 15 6.666666666666667 0.053699554154987415 RAB3B, RFC1, ATRX, SMC6, ARHGAP5, SMC4, KIF15, ASPM, CENPE, KIF18A, ABCB10, CACNB4, KIF2A, GNAQ, RHOQ 197 915 20667 1.7198135974036783 0.9999999999999998 1.0 0.9984709480122325
INTERPRO IPR017956:AT_hook_DNA-bd_motif 2 0.8888888888888888 0.05557669714714598 HMGA2, ASH1L 197 6 20667 34.96954314720812 1.0 1.0 0.9984709480122325
INTERPRO IPR019821:Kinesin_motor_CS 3 1.3333333333333335 0.05764779796834424 CENPE, KIF18A, KIF2A 197 41 20667 7.676241178655441 1.0 1.0 0.9984709480122325
INTERPRO IPR016157:Cullin_CS 2 0.8888888888888888 0.06453594245764546 CUL5, CUL4B 197 7 20667 29.973894126178386 1.0 1.0 0.9984709480122325
INTERPRO IPR000225:Armadillo 3 1.3333333333333335 0.06792661057466248 ARMC1, USO1, KPNA3 197 45 20667 6.993908629441625 1.0 1.0 0.9984709480122325
INTERPRO IPR000504:RRM_dom 6 2.666666666666667 0.07263858314752875 RBMX2, ZNF638, RBM41, RBMS1, NOL8, PABPC1 197 234 20667 2.689964857477548 1.0 1.0 0.9984709480122325
INTERPRO IPR019559:Cullin_neddylation_domain 2 0.8888888888888888 0.07341062567737203 CUL5, CUL4B 197 8 20667 26.22715736040609 1.0 1.0 0.9984709480122325
INTERPRO IPR045093:Cullin 2 0.8888888888888888 0.07341062567737203 CUL5, CUL4B 197 8 20667 26.22715736040609 1.0 1.0 0.9984709480122325
INTERPRO IPR050839:Rho-assoc_Ser/Thr_Kinase 2 0.8888888888888888 0.08220154088856355 ROCK1, CDC42BPA 197 9 20667 23.313028764805413 1.0 1.0 0.9984709480122325
INTERPRO IPR016158:Cullin_homology 2 0.8888888888888888 0.08220154088856355 CUL5, CUL4B 197 9 20667 23.313028764805413 1.0 1.0 0.9984709480122325
INTERPRO IPR036317:Cullin_homology_sf 2 0.8888888888888888 0.08220154088856355 CUL5, CUL4B 197 9 20667 23.313028764805413 1.0 1.0 0.9984709480122325
INTERPRO IPR050576:Cilia_flagella_integrity 2 0.8888888888888888 0.0909094747649391 CNTRL, LRRCC1 197 10 20667 20.98172588832487 1.0 1.0 0.9984709480122325
INTERPRO IPR001373:Cullin_N 2 0.8888888888888888 0.0909094747649391 CUL5, CUL4B 197 10 20667 20.98172588832487 1.0 1.0 0.9984709480122325
INTERPRO IPR022755:Znf_C2H2_jaz 2 0.8888888888888888 0.0909094747649391 ZNF638, DNAJC21 197 10 20667 20.98172588832487 1.0 1.0 0.9984709480122325

## Sheet: 2S1D
												Plot data	Fig. S3D
	Name	baseMean	log2FoldChange	lfcSE	stat	pvalue	padj	geneID	type				Type	Freq
	L1PA10	8.98746	5.61629	1.71647	3.272	0.00106791	0.010312	L1PA10	L1:LINE			1	ERVK:LTR	1
	LTR25	14.3887	5.40797	1.45181	3.72498	0.000195327	0.00259323	LTR25	ERV1:LTR			2	ERVL-MaLR:LTR	1
	MER87:ERV1:LTR	16.427	3.37179	1.18233	2.85182	0.004347	0.0290471	MER87	ERV1:LTR			3	TcMar-Tigger:DNA	1
	L1PA2	37.2869	3.25878	0.683708	4.76633	1.87613e-06	5.11625e-05	L1PA2	L1:LINE			4	hAT-Charlie:DNA	2
	L1PA3	35.617	3.16536	0.827213	3.82653	0.00012996	0.00178309	L1PA3	L1:LINE			5	ERVL:LTR	3
	LTR60B:ERV1:LTR	11.4804	3.14426	1.13438	2.77179	0.0055749	0.0362908	LTR60B	ERV1:LTR			6	Alu:SINE	6
	LTR9C:ERV1:LTR	17.3535	3.05604	0.978549	3.12303	0.00178998	0.0151772	LTR9C	ERV1:LTR			7	ERV1:LTR	8
	ERV3-16A3_LTR:ERVL:LTR	86.1461	2.91191	0.84875	3.43082	0.000601756	0.0065997	ERV3-16A3_LTR	ERVL:LTR			8	L1:LINE	24
	L1M3de:L1:LINE	194.884	2.84081	0.595437	4.77097	1.83341e-06	5.11625e-05	L1M3de	L1:LINE
	MER70-int:ERVL:LTR	19.082	2.80687	0.884545	3.17323	0.00150752	0.013828	MER70-int	ERVL:LTR
	LTR76:ERV1:LTR	39.4817	2.49117	0.921446	2.70354	0.00686042	0.0432635	LTR76	ERV1:LTR
	HERV9NC-int:ERV1:LTR	46.2787	2.45742	0.637163	3.85682	0.000114872	0.00160981	HERV9NC-int	ERV1:LTR
	MLT2A1:ERVL:LTR	626.369	2.44705	0.317287	7.71241	1.23468e-14	2.49158e-12	MLT2A1	ERVL:LTR
	L1M3d:L1:LINE	42.4419	2.01723	0.656314	3.07358	0.00211506	0.0174926	L1M3d	L1:LINE
	LTR70:ERV1:LTR	312.539	1.93764	0.299681	6.46566	1.00856e-10	8.48029e-09	LTR70	ERV1:LTR
	L1PA12:L1:LINE	288.06	1.73003	0.38019	4.55044	5.35331e-06	0.000125616	L1PA12	L1:LINE
	MER11A:ERVK:LTR	318.686	1.60976	0.529397	3.04074	0.00235997	0.0187473	MER11A	ERVK:LTR
	FLAM_C:Alu:SINE	49408	1.59536	0.347044	4.59698	4.28652e-06	0.00010549	FLAM_C	Alu:SINE
	Tigger5:TcMar-Tigger:DNA	182.442	1.55299	0.446109	3.48118	0.000499204	0.00565951	Tigger5	TcMar-Tigger:DNA
	L1PA6:L1:LINE	2956.76	1.519	0.178954	8.48826	2.09761e-17	7.05497e-15	L1PA6	L1:LINE
	MLT1E3:ERVL-MaLR:LTR	310.244	1.48192	0.361773	4.09627	4.19868e-05	0.000694503	MLT1E3	ERVL-MaLR:LTR
	L1PB1:L1:LINE	4689.36	1.44286	0.18202	7.92696	2.24571e-15	5.6648e-13	L1PB1	L1:LINE
	L1PA2:L1:LINE	20468.9	1.43734	0.191339	7.51201	5.82282e-14	7.34403e-12	L1PA2	L1:LINE
	AluYg6:Alu:SINE	786.52	1.40691	0.283666	4.95973	7.05909e-07	2.09489e-05	AluYg6	Alu:SINE
	HAL1ME:L1:LINE	2546.69	1.40636	0.229771	6.1207	9.31677e-10	5.87539e-08	HAL1ME	L1:LINE
	L1PA11:L1:LINE	1064.53	1.38989	0.273275	5.08606	3.6558e-07	1.30524e-05	L1PA11	L1:LINE
	MER52D:ERV1:LTR	116.017	1.38172	0.45038	3.06789	0.00215577	0.0176843	MER52D	ERV1:LTR
	L1MB2:L1:LINE	3952.78	1.31581	0.173325	7.59159	3.16e-14	4.55491e-12	L1MB2	L1:LINE
	AluYb8:Alu:SINE	9608.38	1.31444	0.211163	6.22474	4.8235e-10	3.47636e-08	AluYb8	Alu:SINE
	AluYh3a3:Alu:SINE	618.167	1.30509	0.310283	4.20613	2.59784e-05	0.000459862	AluYh3a3	Alu:SINE
	L1P3:L1:LINE	317.583	1.30036	0.322458	4.03264	5.51527e-05	0.000843167	L1P3	L1:LINE
	L1PA3:L1:LINE	13119.1	1.2754	0.181218	7.03792	1.95126e-12	2.18758e-10	L1PA3	L1:LINE
	AluYi6:Alu:SINE	1802.3	1.23959	0.265157	4.67491	2.94086e-06	7.60853e-05	AluYi6	Alu:SINE
	AluYa5:Alu:SINE	12492.4	1.15014	0.223114	5.15492	2.53741e-07	9.48241e-06	AluYa5	Alu:SINE
	MER1B:hAT-Charlie:DNA	749.639	1.11822	0.268888	4.15869	3.20083e-05	0.000550354	MER1B	hAT-Charlie:DNA
	L1PA16:L1:LINE	2809.9	1.09922	0.158417	6.93873	3.9563e-12	3.9919e-10	L1PA16	L1:LINE
	L1PREC2:L1:LINE	971.674	1.09425	0.20869	5.24343	1.57623e-07	6.62672e-06	L1PREC2	L1:LINE
	Charlie2b:hAT-Charlie:DNA	3263.86	1.08138	0.244133	4.42945	9.44738e-06	0.000207947	Charlie2b	hAT-Charlie:DNA
	L1PA5:L1:LINE	4240.43	1.07344	0.174019	6.16853	6.89298e-10	4.63668e-08	L1PA5	L1:LINE
	L1M4b:L1:LINE	809.129	1.02902	0.189763	5.42264	5.87252e-08	2.57625e-06	L1M4b	L1:LINE
	L1MA3:L1:LINE	1926.28	1.02895	0.184177	5.58673	2.3138e-08	1.11173e-06	L1MA3	L1:LINE
	L1MEg1:L1:LINE	190.989	1.0276	0.338204	3.03842	0.00237825	0.0187473	L1MEg1	L1:LINE
	L1P2:L1:LINE	922.462	1.02212	0.256138	3.9905	6.59347e-05	0.000992957	L1P2	L1:LINE
	L1PA4:L1:LINE	5125.26	1.02173	0.180211	5.66963	1.43108e-08	7.21981e-07	L1PA4	L1:LINE
	L1PA14:L1:LINE	519.695	1.00441	0.30504	3.29273	0.000992211	0.00991229	L1PA14	L1:LINE
	L1HS:L1:LINE	5370.48	1.00352	0.18129	5.53544	3.10446e-08	1.42382e-06	L1HS	L1:LINE
	L1MDa:L1:LINE	797.388	0.959711	0.31422	3.05427	0.00225613	0.0180669	L1MDa	L1:LINE
	L1PB3:L1:LINE	354.288	0.942079	0.335065	2.81163	0.0049291	0.0327201	L1PB3	L1:LINE
	L1MA4:L1:LINE	1190.71	0.898601	0.180205	4.98655	6.14671e-07	1.93814e-05	L1MA4	L1:LINE
	L1P1:L1:LINE	1027.28	0.884462	0.200541	4.41038	1.03191e-05	0.000221531	L1P1	L1:LINE
	L1PA13:L1:LINE	1457.31	0.853595	0.211511	4.0357	5.44392e-05	0.000843167	L1PA13	L1:LINE
	MLT2A2:ERVL:LTR	538.186	0.851492	0.234415	3.63242	0.000280779	0.00358615	MLT2A2	ERVL:LTR
	L1MB4:L1:LINE	1621.25	0.807448	0.176184	4.58297	4.5842e-06	0.00011013	L1MB4	L1:LINE
	L1PA15:L1:LINE	1676.03	0.801561	0.179486	4.46587	7.97453e-06	0.00018287	L1PA15	L1:LINE
	L1MD1:L1:LINE	3143.52	0.756318	0.178312	4.24155	2.21977e-05	0.000399955	L1MD1	L1:LINE
	L1MC2:L1:LINE	1147.08	0.704968	0.223842	3.1494	0.00163609	0.0143549	L1MC2	L1:LINE
	L1MA4A:L1:LINE	936.801	0.693785	0.218844	3.17023	0.00152321	0.0138461	L1MA4A	L1:LINE
	L1M1:L1:LINE	1835.93	0.6738	0.194196	3.46969	0.00052105	0.00584155	L1M1	L1:LINE
	L1MA8:L1:LINE	1208.55	0.62749	0.210254	2.98444	0.00284097	0.0210775	L1MA8	L1:LINE
	L1MA9:L1:LINE	2203.61	0.56626	0.189324	2.99096	0.00278104	0.0209927	L1MA9	L1:LINE
	LTR12C:ERV1:LTR	1311.49	0.531561	0.192386	2.76299	0.00572745	0.0370449	LTR12C	ERV1:LTR
	L1MA6:L1:LINE	1048.31	0.488235	0.174644	2.79561	0.00518025	0.0341626	L1MA6	L1:LINE
	L1MEf:L1:LINE	1651.63	0.487487	0.168133	2.89942	0.00373859	0.0256615	L1MEf	L1:LINE
	L2b:L2:LINE	9270.95	-0.410723	0.150787	-2.72386	0.00645247	0.0409468	L2b	L2:LINE
	L2c:L2:LINE	14445.8	-0.508306	0.162502	-3.12801	0.00175997	0.0151772	L2c	L2:LINE
	L1MC5a:L1:LINE	2726.45	-0.551488	0.198034	-2.78482	0.0053557	0.0350903	L1MC5a	L1:LINE
	MLT1J2:ERVL-MaLR:LTR	463.605	-0.56655	0.213348	-2.65552	0.00791865	0.0493205	MLT1J2	ERVL-MaLR:LTR
	MLT1B:ERVL-MaLR:LTR	1505.26	-0.56736	0.210682	-2.69297	0.00708181	0.0443823	MLT1B	ERVL-MaLR:LTR
	L2a:L2:LINE	18102.3	-0.578164	0.170453	-3.39193	0.000694033	0.00733683	L2a	L2:LINE
	MIRb:MIR:SINE	20631.3	-0.579706	0.159965	-3.62396	0.000290125	0.00365921	MIRb	MIR:SINE
	MER3:hAT-Charlie:DNA	1791.06	-0.601354	0.207251	-2.90157	0.00371298	0.0256603	MER3	hAT-Charlie:DNA
	AluJr4:Alu:SINE	5148.32	-0.60283	0.183905	-3.27794	0.00104568	0.0103016	AluJr4	Alu:SINE
	HERVH-int:ERV1:LTR	1245.09	-0.623983	0.208831	-2.98797	0.00280834	0.0209927	HERVH-int	ERV1:LTR
	L1MD:L1:LINE	2074.8	-0.646476	0.179822	-3.59508	0.000324292	0.00403964	L1MD	L1:LINE
	MER21C:ERVL:LTR	1014.9	-0.654894	0.226485	-2.89156	0.00383335	0.0261341	MER21C	ERVL:LTR
	FRAM:Alu:SINE	1388.09	-0.675137	0.176506	-3.825	0.000130772	0.00178309	FRAM	Alu:SINE
	L3b:CR1:LINE	1282.44	-0.685024	0.216818	-3.15944	0.00158072	0.0141151	L3b	CR1:LINE
	MLT1L:ERVL-MaLR:LTR	1077.66	-0.697983	0.241763	-2.88705	0.00388867	0.0263334	MLT1L	ERVL-MaLR:LTR
	MER112:hAT-Charlie:DNA	984.549	-0.702605	0.204518	-3.43541	0.000591649	0.00656015	MER112	hAT-Charlie:DNA
	LTR5_Hs:ERVK:LTR	5785.46	-0.711968	0.219845	-3.2385	0.00120158	0.0113308	LTR5_Hs	ERVK:LTR
	Tigger3a:TcMar-Tigger:DNA	779.009	-0.722115	0.248173	-2.90972	0.00361752	0.0251729	Tigger3a	TcMar-Tigger:DNA
	MLT1D:ERVL-MaLR:LTR	2784.31	-0.739385	0.18734	-3.94675	7.92184e-05	0.00117546	MLT1D	ERVL-MaLR:LTR
	LTR16D1:ERVL:LTR	1833.48	-0.74522	0.235871	-3.15943	0.00158078	0.0141151	LTR16D1	ERVL:LTR
	L1ME3B:L1:LINE	1805.6	-0.782313	0.178014	-4.39467	1.10943e-05	0.000228451	L1ME3B	L1:LINE
	Charlie1b:hAT-Charlie:DNA	399.437	-0.830773	0.279367	-2.97377	0.00294166	0.0215082	Charlie1b	hAT-Charlie:DNA
	Charlie8:hAT-Charlie:DNA	471.816	-0.838518	0.271036	-3.09375	0.00197641	0.0166183	Charlie8	hAT-Charlie:DNA
	L1M4c:L1:LINE	3071.67	-0.853297	0.193781	-4.40342	1.06559e-05	0.000223995	L1M4c	L1:LINE
	MARNA:TcMar-Mariner:DNA	2290.71	-0.859295	0.242135	-3.54883	0.000386946	0.00464796	MARNA	TcMar-Mariner:DNA
	MER113:hAT-Charlie:DNA	280.635	-0.866919	0.260948	-3.32219	0.000893138	0.00901176	MER113	hAT-Charlie:DNA
	MLT1J:ERVL-MaLR:LTR	1993.27	-0.872112	0.203873	-4.27772	1.88816e-05	0.000359463	MLT1J	ERVL-MaLR:LTR
	MER103C:hAT-Charlie:DNA	737.291	-0.877224	0.259781	-3.37678	0.000733392	0.00749648	MER103C	hAT-Charlie:DNA
	L1ME3D:L1:LINE	1167.09	-0.879982	0.279666	-3.14655	0.00165212	0.0143706	L1ME3D	L1:LINE
	MER21A:ERVL:LTR	404.925	-0.884448	0.283089	-3.12427	0.00178247	0.0151772	MER21A	ERVL:LTR
	LTR16C:ERVL:LTR	421.803	-0.886225	0.278281	-3.18463	0.00144937	0.0134166	LTR16C	ERVL:LTR
	MIR1_Amn:MIR:SINE	2513.09	-0.886281	0.213497	-4.15127	3.30642e-05	0.000556029	MIR1_Amn	MIR:SINE
	LTR16A:ERVL:LTR	429.594	-0.895377	0.275019	-3.25569	0.00113117	0.0107675	LTR16A	ERVL:LTR
	Charlie15b:hAT-Charlie:DNA	833.247	-0.90727	0.260376	-3.48446	0.000493124	0.00565412	Charlie15b	hAT-Charlie:DNA
	CR1_Mam:CR1:LINE	256.993	-0.915466	0.279906	-3.27062	0.00107311	0.010312	CR1_Mam	CR1:LINE
	SVA_D:SVA:Retroposon	1380.53	-0.922677	0.184813	-4.9925	5.96024e-07	1.93814e-05	SVA_D	SVA:Retroposon
	MER102b:hAT-Charlie:DNA	489.899	-0.928637	0.259433	-3.57948	0.000344277	0.00423629	MER102b	hAT-Charlie:DNA
	LTR13:ERVK:LTR	762.41	-0.947087	0.307597	-3.07899	0.00207705	0.0173202	LTR13	ERVK:LTR
	MER102a:hAT-Charlie:DNA	661.891	-0.976396	0.25259	-3.86553	0.000110848	0.00157529	MER102a	hAT-Charlie:DNA
	LTR3:ERVK:LTR	407.083	-0.976897	0.332098	-2.94159	0.00326535	0.023367	LTR3	ERVK:LTR
	Charlie22a:hAT-Charlie:DNA	236.983	-0.994156	0.341028	-2.91517	0.0035549	0.0250049	Charlie22a	hAT-Charlie:DNA
	MER49:ERV1:LTR	360.846	-1.00334	0.339533	-2.95507	0.00312594	0.0225291	MER49	ERV1:LTR
	MER117:hAT-Charlie:DNA	822.572	-1.0189	0.206455	-4.93521	8.00641e-07	2.30813e-05	MER117	hAT-Charlie:DNA
	MER51A:ERV1:LTR	722.419	-1.08625	0.278056	-3.90659	9.3608e-05	0.00134929	MER51A	ERV1:LTR
	Zaphod2:hAT-Tip100:DNA	319.514	-1.09628	0.32305	-3.39354	0.000689953	0.00733683	Zaphod2	hAT-Tip100:DNA
	LTR16E1:ERVL:LTR	243.691	-1.1894	0.312259	-3.809	0.000139529	0.00187713	LTR16E1	ERVL:LTR
	MER90a:ERV1:LTR	197.015	-1.19889	0.339357	-3.53283	0.000411134	0.00482365	MER90a	ERV1:LTR
	7SK:RNA:RNA	150.606	-1.20132	0.366665	-3.27635	0.0010516	0.0103016	7SK	RNA:RNA
	LTR89:ERVL:LTR	183.326	-1.20744	0.404105	-2.98793	0.00280873	0.0209927	LTR89	ERVL:LTR
	MER110A:ERV1:LTR	116.536	-1.21485	0.378011	-3.21381	0.00130987	0.0122375	MER110A	ERV1:LTR
	Helitron2Na_Mam:Helitron:RC?	1018.35	-1.22277	0.259786	-4.70683	2.51599e-06	6.68062e-05	Helitron2Na_Mam	Helitron:RC_Unknown
	MER4E:ERV1:LTR	194.196	-1.25221	0.365665	-3.42448	0.000615973	0.00668298	MER4E	ERV1:LTR
	MER11B:ERVK:LTR	493.458	-1.28341	0.22495	-5.70533	1.16118e-08	6.1665e-07	MER11B	ERVK:LTR
	MamRep1879:hAT-Tip100:DNA	108.176	-1.28999	0.43324	-2.97753	0.0029058	0.0214011	MamRep1879	hAT-Tip100:DNA
	LTR26:ERV1:LTR	100.966	-1.31163	0.447872	-2.92859	0.00340509	0.0241953	LTR26	ERV1:LTR
	MER102c:hAT-Charlie:DNA	523.845	-1.33032	0.311881	-4.26549	1.99462e-05	0.000365922	MER102c	hAT-Charlie:DNA
	LTR12F:ERV1:LTR	215.074	-1.33475	0.378476	-3.52665	0.000420845	0.00488083	LTR12F	ERV1:LTR
	L1MB5:L1:LINE	4093.23	-1.33988	0.176328	-7.5988	2.9888e-14	4.55491e-12	L1MB5	L1:LINE
	LTR7B:ERV1:LTR	690.587	-1.36171	0.31818	-4.27969	1.8715e-05	0.000359463	LTR7B	ERV1:LTR
	Tigger3d:TcMar-Tigger:DNA	236.964	-1.37364	0.336501	-4.08214	4.46231e-05	0.000726204	Tigger3d	TcMar-Tigger:DNA
	MER9a3:ERVK:LTR	257.584	-1.37792	0.387372	-3.5571	0.000374977	0.00455846	MER9a3	ERVK:LTR
	LTR42:ERVL:LTR	131.218	-1.46388	0.48572	-3.01383	0.00257975	0.020178	LTR42	ERVL:LTR
	MER113A:hAT-Charlie:DNA	208.987	-1.48317	0.470763	-3.15056	0.00162957	0.0143549	MER113A	hAT-Charlie:DNA
	LTR35:ERV1:LTR	126.344	-1.48945	0.401683	-3.70802	0.000208884	0.0027372	LTR35	ERV1:LTR
	LTR104_Mam:Gypsy:LTR	1215.13	-1.50053	0.247356	-6.06626	1.30924e-09	7.77075e-08	LTR104_Mam	Gypsy:LTR
	LTR46:ERV1:LTR	184.459	-1.50709	0.303544	-4.96499	6.87057e-07	2.09489e-05	LTR46	ERV1:LTR
	UCON80_AMi:UCON80_AMi:Unknown	99.2376	-1.51053	0.415174	-3.63832	0.000274424	0.00354992	UCON80_AMi	UCON80_AMi:Unknown
	LTR85a:Gypsy:LTR	174.745	-1.53309	0.379227	-4.04266	5.28486e-05	0.000834327	LTR85a	Gypsy:LTR
	MLT2B4:ERVL:LTR	1047.72	-1.54756	0.243631	-6.35207	2.12442e-10	1.64888e-08	MLT2B4	ERVL:LTR
	HERV35I-int:ERV1:LTR	72.1218	-1.63503	0.546638	-2.99107	0.00278005	0.0209927	HERV35I-int	ERV1:LTR
	MamGypLTR2c:Gypsy:LTR	80.2762	-1.63916	0.418318	-3.91847	8.91141e-05	0.00130313	MamGypLTR2c	Gypsy:LTR
	X6A_LINE:CR1:LINE	228.58	-1.6495	0.378347	-4.35974	1.30214e-05	0.00025762	X6A_LINE	CR1:LINE
	LTR1B:ERV1:LTR	100.312	-1.65384	0.552428	-2.99377	0.00275551	0.0209927	LTR1B	ERV1:LTR
	MER65-int:ERV1:LTR	700.988	-1.66744	0.252157	-6.6127	3.77362e-11	3.46144e-09	MER65-int	ERV1:LTR
	MER47C:TcMar-Tigger:DNA	389.057	-1.66919	0.412927	-4.04234	5.29206e-05	0.000834327	MER47C	TcMar-Tigger:DNA
	Tigger11a:TcMar-Tigger:DNA	372.378	-1.68764	0.332137	-5.08116	3.75144e-07	1.30524e-05	Tigger11a	TcMar-Tigger:DNA
	MER76:ERVL:LTR	253.822	-1.6901	0.406522	-4.15746	3.21812e-05	0.000550354	MER76	ERVL:LTR
	Charlie30a:hAT-Charlie:DNA	119.145	-1.70828	0.503867	-3.39034	0.000698054	0.00733683	Charlie30a	hAT-Charlie:DNA
	GSATII:centr:Satellite	211.538	-1.75449	0.396163	-4.4287	9.48026e-06	0.000207947	GSATII	centr:Satellite
	MER51-int:ERV1:LTR	150.948	-1.80551	0.412138	-4.38083	1.18229e-05	0.000238585	MER51-int	ERV1:LTR
	LTR24B:ERV1:LTR	65.5272	-1.89344	0.661586	-2.86196	0.00421028	0.0283211	LTR24B	ERV1:LTR
	MER94B:hAT-Blackjack:DNA	44.3392	-1.92876	0.630387	-3.05964	0.00221604	0.0180321	MER94B	hAT-Blackjack:DNA
	LTR7Y:ERV1:LTR	1212.74	-2.00203	0.208353	-9.60886	7.336e-22	7.40202e-19	LTR7Y	ERV1:LTR
	LTR10G:ERV1:LTR	40.0482	-2.04316	0.701161	-2.91397	0.00356859	0.0250049	LTR10G	ERV1:LTR
	LTR40A1:ERVL:LTR	129.115	-2.0537	0.439911	-4.66845	3.03484e-06	7.65539e-05	LTR40A1	ERVL:LTR
	LTR19A:ERV1:LTR	213.41	-2.06193	0.397985	-5.18091	2.20802e-07	8.91158e-06	LTR19A	ERV1:LTR
	AluJo	50.5441	-2.08352	0.617159	-3.37598	0.000735532	0.00749648	AluJo	Alu:SINE
	L1PBb:L1:LINE	49.8213	-2.185	0.79348	-2.75369	0.00589283	0.0378718	L1PBb	L1:LINE
	LTR2	50.2221	-2.2915	0.536439	-4.27168	1.94007e-05	0.000362506	LTR2	ERV1:LTR
	REP522	38.821	-2.39759	0.677259	-3.54014	0.000399915	0.00474723	REP522	telo:Satellite
	BLACKJACK:hAT-Blackjack:DNA	519.858	-2.41067	0.254794	-9.46124	3.04315e-21	1.53527e-18	BLACKJACK	hAT-Blackjack:DNA
	FordPrefect:hAT-Tip100:DNA	134.626	-2.43563	0.484926	-5.02268	5.09542e-07	1.71376e-05	FordPrefect	hAT-Tip100:DNA
	Zaphod3:hAT-Tip100:DNA	120.397	-2.47424	0.478597	-5.16978	2.34375e-07	9.09554e-06	Zaphod3	hAT-Tip100:DNA
	MST-int:ERVL-MaLR:LTR	162.121	-2.52232	0.421777	-5.98023	2.22823e-09	1.24905e-07	MST-int	ERVL-MaLR:LTR
	UCON88:UCON88:Unknown	13.2023	-2.67304	1.00866	-2.65008	0.00804734	0.0498145	UCON88	UCON88:Unknown
	LTR81:Gypsy:LTR	21.5694	-2.7086	0.886348	-3.05591	0.00224375	0.0180669	LTR81	Gypsy:LTR
	FLAM_C	26.5703	-2.85458	0.845075	-3.3779	0.000730413	0.00749648	FLAM_C	Alu:SINE
	MER57E2:ERV1:LTR	12.6465	-4.34675	1.58736	-2.73835	0.00617486	0.0394332	MER57E2	ERV1:LTR
	MER72B:ERV1:LTR	13.3493	-4.77434	1.5876	-3.00727	0.00263606	0.0204599	MER72B	ERV1:LTR
	(CATTC)n:Satellite:Satellite	57.7563	-5.55867	1.877	-2.96147	0.00306179	0.0222255	(CATTC)n	Satellite:Satellite
