# Supplementary material for: The domesticated transposon protein L1TD1 associates with its ancestor L1 ORF1p to promote LINE-1 retrotransposition
Source: eLife. 2025 Mar 20;13:RP96850. doi: 10.7554/eLife.96850 (PMC11925450; doi:10.7554/eLife.96850)
Supplement: Figure 2—source data 1. [file elife-96850-fig2-data1.xlsx]

## Sheet: 2B
		gene_id	lfcSE	pvalue	padj	log2FC_shrunk	group_RIP	gene_name_DB	highlight
	9	ENSG00000104442	0.324903	2.10012734430393e-35	5.57252007638837e-33	3.90711	up	ARMC1	ARMC1
	14	ENSG00000240563	0.451895	5.58812571306797e-30	9.23251503227379e-28	4.85409	up	L1TD1	L1TD1
	16	ENSG00000213463	0.453344	1.01867498182161e-11	2.13265577503647e-10	2.90509	up	SYNJ2BP	SYNJ2BP
	20	ENSG00000230797	0.807055	0.000782534	0.00404867	2.265	up	YY2	YY2
	27	ENSG00000060339	0.179934	1.16172725694395e-58	2.55915606624119e-55	2.87636	up	CCAR1
	28	ENSG00000078674	0.188377	1.03982900460351e-54	1.47254641751923e-51	2.90176	up	PCM1
	29	ENSG00000060982	0.229441	1.31720647179356e-51	1.6321834693612e-48	3.41122	up	BCAT1
	30	ENSG00000107341	0.226648	1.45531043918768e-48	1.44264923836675e-45	3.26657	up	UBE2R2
	31	ENSG00000146757	0.251913	1.60987358840769e-46	1.182124213473e-43	3.53749	up	ZNF92
	43	ENSG00000203668	0.253049	1.72539272303105e-45	1.22170129024334e-42	3.51392	up	CHML
	53	ENSG00000131016	0.298713	2.59201790728811e-45	1.77204644930669e-42	4.10357	up	AKAP12
	54	ENSG00000182670	0.269482	5.90219204551531e-45	3.90056198314622e-42	3.7072	up	TTC3
	55	ENSG00000133739	0.283897	4.3189310111117e-44	2.76216536213873e-41	3.85835	up	LRRCC1
	59	ENSG00000068489	0.260146	1.35040134608985e-39	6.22629234594824e-37	3.35431	up	PRR11
	60	ENSG00000101745	0.294158	1.47748436923658e-37	5.52690662348762e-35	3.66684	up	ANKRD12
	62	ENSG00000151914	0.284953	1.71181366094068e-37	6.28489215589074e-35	3.55723	up	DST
	64	ENSG00000101773	0.264937	2.48556958785649e-37	8.95980048160778e-35	3.30901	up	RBBP8
	65	ENSG00000035928	0.270557	9.04988675478598e-37	3.04106872543029e-34	3.34964	up	RFC1
	70	ENSG00000277998	0.338669	1.13685888753265e-36	3.7565607173704e-34	4.14703	up	EIF3EP3
	74	ENSG00000171634	0.281515	3.96744129346809e-36	1.24854747752855e-33	3.44624	up	BPTF
	79	ENSG00000104408	0.208212	4.20778215355623e-36	1.30349201525634e-33	2.57708	up	EIF3E
	82	ENSG00000198162	0.307761	6.36324525705437e-36	1.94088769948246e-33	3.74046	up	MAN1A2
	85	ENSG00000133863	0.30518	1.28108377446597e-35	3.62839527322319e-33	3.69826	up	TEX15
	86	ENSG00000113810	0.205299	1.5364326241901e-34	3.85586243129024e-32	2.48336	up	SMC4
	88	ENSG00000107890	0.331143	3.08173032573774e-34	7.45102261439956e-32	3.90729	up	ANKRD26
	89	ENSG00000023287	0.315724	4.53944460152393e-34	1.0588121019978e-31	3.72608	up	RB1CC1
	91	ENSG00000033867	0.23423	5.00062031545431e-34	1.15281742295578e-31	2.7973	up	SLC4A7
	93	ENSG00000150776	0.243299	9.56438656869056e-34	2.15481281944158e-31	2.89239	up	NKAPD1
	104	ENSG00000109790	0.252793	1.01337998247604e-33	2.25744623961461e-31	3.00118	up	KLHL5
	108	ENSG00000148019	0.236158	2.52607491935946e-33	5.50351223639787e-31	2.79222	up	CEP78
	112	ENSG00000178691	0.190634	3.14804389965261e-33	6.71108799510888e-31	2.26352	up	SUZ12
	114	ENSG00000138182	0.24413	1.27058504096242e-31	2.42217490597317e-29	2.80403	up	KIF20B
	118	ENSG00000138778	0.298307	3.18670934677031e-31	5.84997217676557e-29	3.37245	up	CENPE
	120	ENSG00000078177	0.280172	1.04516104771715e-30	1.85012169036073e-28	3.15003	up	N4BP2
	122	ENSG00000122483	0.249845	1.44466041320882e-30	2.51244187300685e-28	2.81687	up	CCDC18
	132	ENSG00000163029	0.234756	3.34380339642139e-30	5.6181564523263e-28	2.63445	up	SMC6
	137	ENSG00000153207	0.224716	6.46346421727419e-30	1.05036591452195e-27	2.51465	up	AHCTF1
	138	ENSG00000100697	0.230957	5.81862234660141e-29	8.73939444270602e-27	2.53802	up	DICER1
	139	ENSG00000156256	0.201248	1.04498486133902e-28	1.5122532745188e-26	2.20902	up	USP16
	141	ENSG00000137831	0.270456	1.14403310621528e-28	1.64359422926262e-26	2.93646	up	UACA
	142	ENSG00000038219	0.31448	1.78612571972499e-28	2.54760636829264e-26	3.37665	up	BOD1L1
	143	ENSG00000145734	0.30642	2.65350713501849e-28	3.73109450062954e-26	3.28422	up	BDP1
	146	ENSG00000165525	0.232016	3.33697801966815e-28	4.65907931112259e-26	2.51242	up	NEMF
	149	ENSG00000066279	0.303208	3.39232776874585e-28	4.6984532995342e-26	3.24598	up	ASPM
	150	ENSG00000160551	0.236517	3.49338695063374e-28	4.74382806049757e-26	2.55868	up	TAOK1
	157	ENSG00000188322	0.290358	6.07543392440286e-28	8.08399684464505e-26	3.10002	up	SBK1
	160	ENSG00000106536	0.345454	6.28865650530362e-28	8.23951765029905e-26	3.65063	up	POU6F2
	164	ENSG00000126777	0.302946	1.83769979463141e-27	2.32065198269824e-25	3.19662	up	KTN1
	165	ENSG00000138758	0.198651	1.95256665284794e-27	2.4194741537102e-25	2.12901	up	SEPTIN11
	168	ENSG00000105810	0.264096	2.41337115173745e-27	2.9175302716065e-25	2.80051	up	CDK6
	170	ENSG00000133226	0.207781	2.74541066141555e-27	3.29881889534695e-25	2.21816	up	SRRM1
	175	ENSG00000168803	0.272955	6.98163771021868e-27	8.23916364540449e-25	2.86388	up	ADAL
	176	ENSG00000153250	0.243545	9.68381329426678e-27	1.12936048454196e-24	2.5597	up	RBMS1
	178	ENSG00000139116	0.245215	1.31322151115225e-26	1.48776741029169e-24	2.56985	up	KIF21A
	184	ENSG00000101882	0.278263	1.67289289818307e-26	1.88447582951009e-24	2.89379	up	NKAP
	185	ENSG00000147905	0.232732	2.26359027093544e-26	2.52123262424528e-24	2.43208	up	ZCCHC7
	188	ENSG00000067900	0.244549	3.22628286487546e-26	3.47631978690331e-24	2.54228	up	ROCK1
	191	ENSG00000101966	0.315937	3.83224933556142e-26	4.10692839604545e-24	3.24201	up	XIAP
	192	ENSG00000137807	0.145973	5.11103125244507e-26	5.38996306441362e-24	1.52955	up	KIF23
	196	ENSG00000154001	0.200469	9.12463512213451e-26	9.47146680269313e-24	2.07718	up	PPP2R5E
	206	ENSG00000129116	0.266917	1.00585769859632e-25	1.03865285064431e-23	2.73764	up	PALLD
	213	ENSG00000085224	0.294712	1.88086790373844e-25	1.90255546222032e-23	2.99011	up	ATRX
	217	ENSG00000144674	0.406663	1.01308039437774e-24	9.75016111598696e-23	3.97015	up	GOLGA4
	222	ENSG00000119397	0.215363	1.66981139893166e-24	1.55425731432954e-22	2.16758	up	CNTRL
	224	ENSG00000070756	0.223592	2.08924540385709e-24	1.90881932612307e-22	2.24426	up	PABPC1
	227	ENSG00000138674	0.184334	2.55863764090917e-24	2.28502476885879e-22	1.85567	up	SEC31A
	229	ENSG00000160321	0.392184	3.21851487513235e-24	2.8486730318917e-22	3.79767	up	ZNF208
	230	ENSG00000122779	0.194086	3.78316163415321e-24	3.30418337263091e-22	1.94435	up	TRIM24
	237	ENSG00000146247	0.264506	5.03628883640915e-24	4.36023853583615e-22	2.61566	up	PHIP
	240	ENSG00000188342	0.127811	5.19859584010079e-24	4.48118961416688e-22	1.28505	up	GTF2F2
	242	ENSG00000048991	0.27728	8.09494040530184e-24	6.74328943174429e-22	2.72546	up	R3HDM1
	248	ENSG00000107854	0.270595	8.54474651110445e-24	7.05867268038154e-22	2.65959	up	TNKS2
	249	ENSG00000142937	0.303531	9.07986632712205e-24	7.43873676865792e-22	2.96582	up	RPS8
	252	ENSG00000033178	0.252282	1.52809092274561e-23	1.22161010622397e-21	2.47319	up	UBA6
	254	ENSG00000164114	0.285816	1.6792574116786e-23	1.33706656401365e-21	2.78596	up	MAP9
	258	ENSG00000198604	0.254852	2.34648383633761e-23	1.84608684679482e-21	2.48646	up	BAZ1A
	262	ENSG00000139218	0.19532	3.26618197332185e-23	2.54942219697162e-21	1.91532	up	SCAF11
	264	ENSG00000122299	0.237799	5.02545282573934e-23	3.86180727608946e-21	2.30665	up	ZC3H7A
	265	ENSG00000113649	0.217315	6.49506511398676e-23	4.91492980724815e-21	2.11021	up	TCERG1
	269	ENSG00000171316	0.265532	7.06198090902158e-23	5.30344066296447e-21	2.55725	up	CHD7
	272	ENSG00000139618	0.36885	7.29487545010643e-23	5.4576679499551e-21	3.48143	up	BRCA2
	275	ENSG00000138587	0.242063	1.14397010549471e-22	8.43135736488403e-21	2.3293	up	MNS1
	276	ENSG00000169083	0.340854	1.77311096869348e-22	1.29241537004842e-20	3.20672	up	AR
	277	ENSG00000075292	0.261038	2.5593226353937e-22	1.84513202070238e-20	2.48302	up	ZNF638
	280	ENSG00000153201	0.286135	2.66885673265217e-22	1.91712875295514e-20	2.7092	up	RANBP2
	283	ENSG00000240376	0.304135	2.89673287508094e-22	2.07330779716082e-20	2.86957	up	RPS8P8
	286	ENSG00000065526	0.292817	4.63538763688949e-22	3.28218554603468e-20	2.75292	up	SPEN
	287	ENSG00000148672	0.178998	5.17400166695603e-22	3.62472639749365e-20	1.70878	up	GLUD1
	288	ENSG00000137710	0.198004	6.84814723556867e-22	4.74725059763582e-20	1.88067	up	RDX
	290	ENSG00000148773	0.324367	7.46330795450593e-22	5.15566353679563e-20	3.01378	up	MKI67
	291	ENSG00000046651	0.2584	7.81495841681012e-22	5.37983908234991e-20	2.43091	up	OFD1
	294	ENSG00000102786	0.248241	9.74589727631287e-22	6.66283308276479e-20	2.33202	up	INTS6
	295	ENSG00000133302	0.271433	1.06814533181792e-21	7.27733654591824e-20	2.53967	up	SLF1
	296	ENSG00000158290	0.370508	1.62202708418512e-21	1.09382003302905e-19	3.38713	up	CUL4B
	297	ENSG00000100852	0.554303	1.8291216150367e-21	1.22929373354975e-19	4.82603	up	ARHGAP5
	304	ENSG00000123066	0.270494	2.15914015193007e-21	1.44618623824884e-19	2.51044	up	MED13L
	306	ENSG00000123104	0.324233	2.24728776972042e-21	1.50015916910697e-19	2.97022	up	ITPR2
	309	ENSG00000136485	0.149363	3.06303724815129e-21	1.99762422637656e-19	1.40316	up	DCAF7
	310	ENSG00000106443	0.197912	3.11969311948881e-21	2.02127567931324e-19	1.84884	up	PHF14
	315	ENSG00000134597	0.250532	5.13061152733383e-21	3.29189333789387e-19	2.31139	up	RBMX2
	317	ENSG00000134318	0.270592	5.19105269923653e-21	3.31992938113108e-19	2.48755	up	ROCK2
	321	ENSG00000197969	0.287934	7.6611928379135e-21	4.82193045093565e-19	2.62859	up	VPS13A
	325	ENSG00000089682	0.366802	9.33721627082901e-21	5.83973658629199e-19	3.29271	up	RBM41
	329	ENSG00000116005	0.319508	1.21109832231931e-20	7.48013561940895e-19	2.88452	up	PCYOX1
	330	ENSG00000154380	0.212568	1.44241905965442e-20	8.79920008514108e-19	1.94841	up	ENAH
	333	ENSG00000115355	0.311526	2.11955712853472e-20	1.27727476080028e-18	2.79843	up	CCDC88A
	337	ENSG00000135776	0.278128	2.24888150680768e-20	1.34701887474227e-18	2.51227	up	ABCB10
	338	ENSG00000198707	0.283079	2.32682587527037e-20	1.38533482892223e-18	2.5541	up	CEP290
	339	ENSG00000129534	0.262424	3.17998894572384e-20	1.87081486165938e-18	2.36626	up	MIS18BP1
	340	ENSG00000186687	0.247742	3.32614129646895e-20	1.95100820543767e-18	2.23865	up	LYRM7
	342	ENSG00000120694	0.282144	3.35682439494619e-20	1.96319765351632e-18	2.53479	up	HSPH1
	344	ENSG00000058272	0.299232	3.39077057629364e-20	1.97721816016464e-18	2.67855	up	PPP1R12A
	346	ENSG00000128915	0.177623	3.73337167896173e-20	2.16426394465191e-18	1.61747	up	ICE2
	349	ENSG00000174485	0.258525	4.15831049507044e-20	2.39658906614147e-18	2.32462	up	DENND4A
	352	ENSG00000104320	0.207349	4.61764641436947e-20	2.64593808703148e-18	1.87719	up	NBN
	354	ENSG00000280079	0.536221	5.14636742806465e-20	2.92354958821805e-18	4.54308	up	NA
	355	ENSG00000168724	0.279192	5.90491168837347e-20	3.33356840371614e-18	2.49204	up	DNAJC21
	357	ENSG00000101974	0.289708	7.40540031018947e-20	4.14744255790442e-18	2.57295	up	ATP11C
	358	ENSG00000108510	0.285718	8.07706424236853e-20	4.51086973716052e-18	2.53724	up	MED13
	359	ENSG00000170522	0.193945	8.85375751348145e-20	4.91693547513398e-18	1.7453	up	ELOVL6
	360	ENSG00000162688	0.287187	1.0065591086221e-19	5.57431309707872e-18	2.54238	up	AGL
	365	ENSG00000168772	0.310524	1.01406812453504e-19	5.60025477354643e-18	2.74205	up	CXXC4
	366	ENSG00000111642	0.279316	1.04164665045903e-19	5.73657958111131e-18	2.47442	up	CHD4
	367	ENSG00000114739	0.242836	1.24456453048156e-19	6.76020174830887e-18	2.16057	up	ACVR2B
	369	ENSG00000164323	0.326263	1.37787293761632e-19	7.46385488010415e-18	2.85886	up	CFAP97
	372	ENSG00000162623	0.299105	1.40729617185257e-19	7.60246700358286e-18	2.63456	up	TYW3
	375	ENSG00000111371	0.223696	1.51046786263566e-19	8.11559236981428e-18	1.99168	up	SLC38A1
	376	ENSG00000198420	0.328288	2.00448274065414e-19	1.06830308645723e-17	2.8657	up	TCAF1
	379	ENSG00000134982	0.326125	2.83601169430003e-19	1.4993804760318e-17	2.83509	up	APC
	380	ENSG00000131149	0.17165	3.17613831959247e-19	1.67473718947448e-17	1.52381	up	GSE1
	382	ENSG00000073712	0.196129	3.53448776064142e-19	1.84893810930018e-17	1.73356	up	FERMT2
	384	ENSG00000080345	0.246001	3.70443918997713e-19	1.93134692296384e-17	2.15944	up	RIF1
	385	ENSG00000118412	0.376357	4.40025723100457e-19	2.28375654088735e-17	3.21903	up	CASP8AP2
	389	ENSG00000206557	0.281839	5.17307702890001e-19	2.67087044726489e-17	2.4516	up	TRIM71
	392	ENSG00000106052	0.23607	5.41728218662136e-19	2.78968926316766e-17	2.0652	up	TAX1BP1
	396	ENSG00000087470	0.214999	5.94943795876323e-19	3.03222511492133e-17	1.88461	up	DNM1L
	398	ENSG00000156052	0.324325	8.68164092842595e-19	4.39087278181053e-17	2.78059	up	GNAQ
	401	ENSG00000025796	0.193767	1.23322435770589e-18	6.17421871613054e-17	1.68709	up	SEC63
	405	ENSG00000065613	0.298535	1.48005751991683e-18	7.37276894217868e-17	2.55383	up	SLK
	406	ENSG00000127914	0.244276	1.77939874853707e-18	8.7975959073556e-17	2.10284	up	AKAP9
	411	ENSG00000163808	0.29591	2.06351194021299e-18	1.01015278337439e-16	2.52024	up	KIF15
	414	ENSG00000164163	0.183125	2.1945821103628e-18	1.07166957931165e-16	1.58511	up	ABCE1
	416	ENSG00000102753	0.277584	2.31679454506121e-18	1.11758561193147e-16	2.36941	up	KPNA3
	418	ENSG00000136770	0.224338	2.83783665461734e-18	1.35900844237786e-16	1.925	up	DNAJC1
	424	ENSG00000177425	0.205042	2.92942947319384e-18	1.39612665229666e-16	1.76361	up	PAWR
	426	ENSG00000151012	0.203631	3.10534693193522e-18	1.47288536537195e-16	1.75015	up	SLC7A11
	428	ENSG00000104218	0.330835	4.16596006260861e-18	1.94797934436977e-16	2.77422	up	CSPP1
	431	ENSG00000148143	0.313707	5.00685237264959e-18	2.33018439296128e-16	2.63319	up	ZNF462
	432	ENSG00000166164	0.226675	5.14453457997106e-18	2.38307342482491e-16	1.92955	up	BRD7
	433	ENSG00000100592	0.366989	5.52230319392546e-18	2.54025946920571e-16	3.04322	up	DAAM1
	435	ENSG00000198836	0.249674	5.76550632214336e-18	2.64599371163922e-16	2.1151	up	OPA1
	436	ENSG00000044459	0.220639	6.63519678222637e-18	3.03809264213441e-16	1.87346	up	CNTLN
	437	ENSG00000009954	0.27771	6.91887826824103e-18	3.15341794358958e-16	2.33527	up	BAZ1B
	438	ENSG00000164151	0.383246	6.98846677150337e-18	3.17782894981252e-16	3.15621	up	ICE1
	440	ENSG00000138768	0.301426	8.06128871018243e-18	3.65727940430382e-16	2.52036	up	USO1
	441	ENSG00000183337	0.278448	8.1853568126201e-18	3.70508867961201e-16	2.33537	up	BCOR
	447	ENSG00000122257	0.228262	9.17973679801022e-18	4.1363059490307e-16	1.92804	up	RBBP6
	450	ENSG00000075407	0.404138	9.34707295486671e-18	4.20215574610402e-16	3.30189	up	ZNF37A
	451	ENSG00000077097	0.230783	1.24051195800814e-17	5.50210068891935e-16	1.93989	up	TOP2B
	452	ENSG00000173145	0.214026	1.3064475490491e-17	5.75591757943276e-16	1.80315	up	NOC3L
	453	ENSG00000009413	0.423021	1.31343061308324e-17	5.76107861393546e-16	3.42471	up	REV3L
	454	ENSG00000047410	0.268752	1.31339483681616e-17	5.76107861393546e-16	2.24511	up	TPR
	455	ENSG00000067208	0.327459	1.33155954644886e-17	5.82770409887309e-16	2.70471	up	EVI5
	458	ENSG00000065328	0.169886	1.33792527199459e-17	5.84266661730502e-16	1.43771	up	MCM10
	459	ENSG00000155506	0.265065	1.35412278677725e-17	5.90040403750456e-16	2.21411	up	LARP1
	460	ENSG00000197372	0.324139	1.43927047416995e-17	6.2303441967016e-16	2.67986	up	ZNF675
	462	ENSG00000163714	0.209311	1.55146923915046e-17	6.70140068309302e-16	1.75961	up	U2SURP
	463	ENSG00000132842	0.280114	1.57698871025201e-17	6.79682134118614e-16	2.32883	up	AP3B1
	472	ENSG00000111670	0.254307	1.67356122436306e-17	7.18182355719092e-16	2.12234	up	GNPTAB
	473	ENSG00000198887	0.230023	1.69396820410277e-17	7.25369624504135e-16	1.92657	up	SMC5
	476	ENSG00000229089	0.394407	2.9045600173216e-17	1.22003828185208e-15	3.18671	up	ANKRD20A8P
	478	ENSG00000188994	0.356968	2.92656084877591e-17	1.22668066359051e-15	2.899	up	ZNF292
	484	ENSG00000171988	0.439077	3.16340347289606e-17	1.3175974212949e-15	3.4944	up	JMJD1C
	485	ENSG00000165288	0.354592	3.30673184254905e-17	1.37153275126312e-15	2.87878	up	BRWD3
	488	ENSG00000198301	0.22305	3.71352663987024e-17	1.5211648587204e-15	1.84952	up	SDAD1
	490	ENSG00000008311	0.376079	3.94888467500083e-17	1.61423891889828e-15	3.03149	up	AASS
	491	ENSG00000005483	0.292172	4.45122580340349e-17	1.80840169627618e-15	2.39014	up	KMT2E
	492	ENSG00000174197	0.315478	4.71425013333987e-17	1.90744332946115e-15	2.56681	up	MGA
	497	ENSG00000163939	0.232721	4.80459203216039e-17	1.9400375077314e-15	1.91946	up	PBRM1
	498	ENSG00000112851	0.232046	4.95975225963111e-17	1.99861886787493e-15	1.9141	up	ERBIN
	500	ENSG00000169855	0.20084	5.99125313589947e-17	2.3899916433067e-15	1.65709	up	ROBO1
	501	ENSG00000136824	0.3028	6.01816267655312e-17	2.39590548645265e-15	2.46162	up	SMC2
	502	ENSG00000164134	0.22942	7.03712653050002e-17	2.79036141187387e-15	1.88371	up	NAA15
	505	ENSG00000200913	0.555105	7.13050395963746e-17	2.82174394219106e-15	4.29032	up	SNORD46
	506	ENSG00000169213	0.297757	7.73391575624348e-17	3.0544345375156e-15	2.41439	up	RAB3B
	507	ENSG00000116539	0.313668	8.75366665542891e-17	3.43663752694126e-15	2.53263	up	ASH1L
	509	ENSG00000173473	0.196637	1.0622784957201e-16	4.16220028777604e-15	1.61168	up	SMARCC1
	511	ENSG00000136108	0.180663	1.1700216742137e-16	4.57531552523883e-15	1.48178	up	CKAP2
	515	ENSG00000055609	0.34062	1.21787689517861e-16	4.74373817756602e-15	2.71922	up	KMT2C
	517	ENSG00000100503	0.294056	1.31993005733006e-16	5.12112197977022e-15	2.36867	up	NIN
	519	ENSG00000170017	0.320644	1.59799061054695e-16	6.15179841644734e-15	2.56214	up	ALCAM
	521	ENSG00000122786	0.16672	1.97084480780127e-16	7.55782769041936e-15	1.35908	up	CALD1
	524	ENSG00000107863	0.315498	2.04715904788506e-16	7.82022645151622e-15	2.51349	up	ARHGAP21
	526	ENSG00000231074	0.307496	2.16389764491e-16	8.23444044299151e-15	2.45484	up	HCG18
	527	ENSG00000056097	0.206074	2.48774996868784e-16	9.41262039679486e-15	1.66654	up	ZFR
	528	ENSG00000101935	0.372051	2.63888248774062e-16	9.94647988630143e-15	2.92315	up	AMMECR1
	529	ENSG00000163535	0.264031	2.67086225173962e-16	1.00479155603396e-14	2.11556	up	SGO2
	532	ENSG00000136628	0.22395	2.889153029168e-16	1.08485507492964e-14	1.8028	up	EPRS1
	533	ENSG00000153015	0.185184	2.89760548931341e-16	1.08597214425572e-14	1.49815	up	CWC27
	534	ENSG00000054654	0.318495	3.10618460002838e-16	1.15757924586772e-14	2.52098	up	SYNE2
	535	ENSG00000153317	0.229446	3.22448666754402e-16	1.19941224522942e-14	1.84355	up	ASAP1
	536	ENSG00000233668	0.420451	3.24485346448263e-16	1.20472780499686e-14	3.25901	up	RPS8P9
	541	ENSG00000197555	0.452594	3.30320307029436e-16	1.22409914152628e-14	3.46689	up	SIPA1L1
	546	ENSG00000066933	0.297798	3.44113241764554e-16	1.27283379313881e-14	2.36173	up	MYO9A
	551	ENSG00000111647	0.260358	4.10372291966429e-16	1.50388929030063e-14	2.07484	up	BLTP3B
	552	ENSG00000096401	0.202896	4.69979021556334e-16	1.70655752406152e-14	1.62606	up	CDC5L
	558	ENSG00000133103	0.284214	5.39125259408017e-16	1.93987248512221e-14	2.24506	up	COG6
	565	ENSG00000138398	0.206761	5.50589860669015e-16	1.97753524956955e-14	1.65226	up	PPIG
	567	ENSG00000076108	0.2245	6.94865519679131e-16	2.46447295047557e-14	1.78292	up	BAZ2A
	568	ENSG00000151718	0.287569	9.38062227051742e-16	3.29168525903147e-14	2.25184	up	WWC2
	570	ENSG00000070961	0.275417	9.88933413314813e-16	3.45795306038439e-14	2.15898	up	ATP2B1
	571	ENSG00000197020	0.270985	1.02297783941521e-15	3.57069694440951e-14	2.12855	up	ZNF100
	573	ENSG00000176853	0.255387	1.03549712265244e-15	3.6017133252118e-14	2.0087	up	FAM91A1
	575	ENSG00000111615	0.171606	1.10016395198875e-15	3.81993879371787e-14	1.36304	up	KRR1
	579	ENSG00000163104	0.35674	1.18430229338012e-15	4.09772727199901e-14	2.74683	up	SMARCAD1
	583	ENSG00000198000	0.268777	1.3064076672065e-15	4.504493636528e-14	2.10099	up	NOL8
	587	ENSG00000114062	0.216628	1.40114480936525e-15	4.79777150094567e-14	1.70448	up	UBE3A
	588	ENSG00000032219	0.277552	1.56734955498368e-15	5.32093703375109e-14	2.15864	up	ARID4A
	592	ENSG00000126653	0.225146	1.6647579813375e-15	5.62274135229936e-14	1.76494	up	NSRP1
	595	ENSG00000029363	0.22649	1.68934344270029e-15	5.69607535628842e-14	1.77466	up	BCLAF1
	600	ENSG00000070018	0.297706	1.99736478579362e-15	6.68914767620679e-14	2.29806	up	LRP6
	602	ENSG00000073614	0.221233	2.1737483657823e-15	7.2431487563025e-14	1.72758	up	KDM5A
	603	ENSG00000092148	0.266704	2.73607467669069e-15	9.04090275667827e-14	2.06015	up	HECTD1
	606	ENSG00000068796	0.266274	2.96925020539513e-15	9.77879644055878e-14	2.0556	up	KIF2A
	607	ENSG00000196628	0.271155	3.05412344696946e-15	1.00416337412299e-13	2.091	up	TCF4
	608	ENSG00000119707	0.239606	3.58917441924727e-15	1.1742404626402e-13	1.85137	up	RBM25
	612	ENSG00000091136	0.278786	3.62272949474353e-15	1.1832658148729e-13	2.14067	up	LAMB1
	613	ENSG00000163785	0.349173	3.67323285376429e-15	1.19778806840018e-13	2.64597	up	RYK
	616	ENSG00000166233	0.221893	4.11246791400032e-15	1.33225145200932e-13	1.71528	up	ARIH1
	625	ENSG00000109670	0.267923	4.17904626356694e-15	1.35161127604369e-13	2.05671	up	FBXW7
	636	ENSG00000136731	0.198087	4.87239654818048e-15	1.56818399292575e-13	1.53192	up	UGGT1
	640	ENSG00000132466	0.21499	6.23287262027347e-15	1.97716692111267e-13	1.65221	up	ANKRD17
	641	ENSG00000253729	0.192306	9.20325702184363e-15	2.86892725967094e-13	1.47297	up	PRKDC
	642	ENSG00000167232	0.411819	1.04440366294805e-14	3.23536672212626e-13	3.02631	up	ZNF91
	645	ENSG00000168916	0.459057	1.11012249369535e-14	3.43358635881498e-13	3.32887	up	ZNF608
	646	ENSG00000147874	0.266269	1.12973488066693e-14	3.48880432151132e-13	2.01202	up	HAUS6
	648	ENSG00000123124	0.285118	1.25360787940295e-14	3.85271677892353e-13	2.14348	up	WWP1
	650	ENSG00000224078	0.215887	1.25534905638283e-14	3.85271677892353e-13	1.64079	up	NA
	654	ENSG00000198464	0.351439	1.31909333379043e-14	4.0358556227977e-13	2.60816	up	ZNF480
	655	ENSG00000117620	0.32672	1.3754194884803e-14	4.19524104286315e-13	2.43483	up	SLC35A3
	657	ENSG00000065243	0.243447	1.53533014624605e-14	4.6543509907453e-13	1.83638	up	PKN2
	660	ENSG00000116044	0.181249	1.55038928496004e-14	4.68567347006368e-13	1.37799	up	NFE2L2
	661	ENSG00000023228	0.172734	1.61972509236169e-14	4.88034493634694e-13	1.31381	up	NDUFS1
	663	ENSG00000163629	0.30676	1.65868582338365e-14	4.98259168703096e-13	2.28526	up	PTPN13
	664	ENSG00000215271	0.378773	1.75647381918819e-14	5.26835853846068e-13	2.77524	up	HOMEZ
	665	ENSG00000138336	0.380107	1.89757278915369e-14	5.67440092273923e-13	2.78482	up	TET1
	668	ENSG00000143776	0.373866	2.00381053314547e-14	5.98306440212984e-13	2.74089	up	CDC42BPA
	669	ENSG00000165732	0.233848	2.0104735593518e-14	5.98493225040673e-13	1.75855	up	DDX21
	670	ENSG00000196504	0.188584	2.21769144219452e-14	6.58202852289648e-13	1.42425	up	PRPF40A
	671	ENSG00000182621	0.339671	2.26558851195688e-14	6.7141342059876e-13	2.50382	up	PLCB1
	675	ENSG00000196693	0.334668	2.28648427154157e-14	6.76594584590794e-13	2.46939	up	ZNF33B
	677	ENSG00000101596	0.311618	2.33864823298238e-14	6.90999103831724e-13	2.30762	up	SMCHD1
	678	ENSG00000121621	0.266691	2.8019754436684e-14	8.22992076239551e-13	1.98481	up	KIF18A
	681	ENSG00000105849	0.184126	2.85163751913064e-14	8.35104364169632e-13	1.38542	up	POLR1F
	683	ENSG00000001629	0.308191	2.87296901599291e-14	8.40110379219401e-13	2.27573	up	ANKIB1
	688	ENSG00000134900	0.220292	3.02843372688238e-14	8.81670001015713e-13	1.64816	up	TPP2
	690	ENSG00000123636	0.35522	3.20645397071813e-14	9.30763637239497e-13	2.59167	up	BAZ2B
	691	ENSG00000138592	0.43215	3.38229314146545e-14	9.74670695097295e-13	3.08991	up	USP8
	695	ENSG00000242615	0.404308	3.9380586156983e-14	1.13153550891065e-12	2.94504	up	NA
	697	ENSG00000163608	0.236622	4.11817832796089e-14	1.18157747511075e-12	1.75734	up	NEPRO
	703	ENSG00000111981	0.223219	4.47223035897134e-14	1.27577610211462e-12	1.65879	up	ULBP1
	704	ENSG00000134987	0.250936	4.58266774585882e-14	1.30352899181344e-12	1.85589	up	WDR36
	705	ENSG00000135837	0.368514	4.81837454272095e-14	1.35887757729709e-12	2.66505	up	CEP350
	707	ENSG00000129003	0.292201	5.22048595783435e-14	1.47018969602307e-12	2.14099	up	VPS13C
	708	ENSG00000166266	0.343887	5.28552379163059e-14	1.48639425096267e-12	2.49522	up	CUL5
	711	ENSG00000198900	0.211246	5.37367651023198e-14	1.50690962506166e-12	1.56704	up	TOP1
	712	ENSG00000048828	0.257426	5.50046315112695e-14	1.54028506263055e-12	1.89563	up	FAM120A
	715	ENSG00000178966	0.256609	5.93238978170836e-14	1.65422728287131e-12	1.88816	up	RMI1
	716	ENSG00000119900	0.279217	6.22691684790096e-14	1.73391648070905e-12	2.04443	up	OGFRL1
	719	ENSG00000173273	0.332352	6.46717306591947e-14	1.79326116370517e-12	2.40676	up	TNKS
	724	ENSG00000164190	0.348389	6.7279758633606e-14	1.86297275791882e-12	2.51315	up	NIPBL
	725	ENSG00000135968	0.2587	7.31992516224799e-14	2.01842609550388e-12	1.89616	up	GCC2
	729	ENSG00000185515	0.228383	8.06588841562933e-14	2.20902531879112e-12	1.67865	up	BRCC3
	730	ENSG00000091656	0.409043	8.67214223729547e-14	2.37150195857407e-12	2.89895	up	ZFHX4
	732	ENSG00000182158	0.290238	9.57253904959266e-14	2.60336295195095e-12	2.10587	up	CREB3L2
	735	ENSG00000115904	0.334453	9.63351600392789e-14	2.61635737388869e-12	2.40685	up	SOS1
	736	ENSG00000049618	0.279142	9.84954307278377e-14	2.66771913881162e-12	2.02673	up	ARID1B
	737	ENSG00000113658	0.26817	1.01443403489262e-13	2.73634954772532e-12	1.95047	up	SMAD5
	740	ENSG00000165934	0.218148	1.02100367387863e-13	2.75032864651055e-12	1.59851	up	CPSF2
	743	ENSG00000078403	0.200431	1.02990974987714e-13	2.77055504763422e-12	1.47189	up	MLLT10
	744	ENSG00000118482	0.356837	1.12037326256011e-13	3.00169193290766e-12	2.54806	up	PHF3
	748	ENSG00000117500	0.249165	1.13301170920555e-13	3.02329611664998e-12	1.81499	up	TMED5
	750	ENSG00000109171	0.214507	1.1765901279147e-13	3.13535966075765e-12	1.56878	up	SLAIN2
	752	ENSG00000280128	0.743448	1.42434897525085e-13	3.77528646835872e-12	4.72296	up	NA
	753	ENSG00000175455	0.329971	1.45286355830186e-13	3.84059638758569e-12	2.35939	up	CCDC14
	755	ENSG00000189180	0.356621	1.4636319807252e-13	3.85877229386406e-12	2.53564	up	ZNF33A
	756	ENSG00000275764	0.679466	1.48805791882035e-13	3.91795966779976e-12	4.45347	up	NA
	759	ENSG00000140836	0.337594	1.55022352233226e-13	4.07082537135887e-12	2.40482	up	ZFHX3
	760	ENSG00000145012	0.421752	1.56717811669007e-13	4.10990388115044e-12	2.95158	up	LPP
	762	ENSG00000170242	0.25227	1.62698239000983e-13	4.24987521269234e-12	1.8244	up	USP47
	764	ENSG00000139734	0.247297	1.86111720736105e-13	4.8550670727816e-12	1.78511	up	DIAPH3
	766	ENSG00000103657	0.302907	1.99518982855864e-13	5.19115925734955e-12	2.16164	up	HERC1
	768	ENSG00000065150	0.216932	2.05206167861621e-13	5.32515377490118e-12	1.57009	up	IPO5
	769	ENSG00000166503	0.25117	2.09661571000572e-13	5.42656697997043e-12	1.80822	up	HDGFL3
	770	ENSG00000113163	0.259353	2.32651002641855e-13	6.00590986767892e-12	1.86081	up	CERT1
	772	ENSG00000055332	0.248971	2.40000399168926e-13	6.18757856166856e-12	1.78884	up	EIF2AK2
	773	ENSG00000199480	0.613022	2.49328352880418e-13	6.41971938208723e-12	4.00679	up	NA
	776	ENSG00000101849	0.212486	2.75321955336261e-13	7.07063871307864e-12	1.53033	up	TBL1X
	781	ENSG00000117523	0.336946	2.90180650947475e-13	7.44258937346008e-12	2.37435	up	PRRC2C
	782	ENSG00000187555	0.134656	2.99389664325849e-13	7.64957364257253e-12	0.976627	up	USP7
	783	ENSG00000165813	0.420896	3.15901626022531e-13	8.01929018888949e-12	2.905	up	CCDC186
	784	ENSG00000075151	0.303107	3.17479963746861e-13	8.04905084558218e-12	2.14531	up	EIF4G3
	786	ENSG00000135049	0.206929	3.19592063175021e-13	8.09225063155552e-12	1.48748	up	AGTPBP1
	788	ENSG00000118873	0.277597	3.51610914620847e-13	8.89163009346034e-12	1.97181	up	RAB3GAP2
	790	ENSG00000163605	0.309503	3.74460100593132e-13	9.4453510869713e-12	2.18149	up	PPP4R2
	794	ENSG00000062650	0.239381	3.81459491417615e-13	9.59748207721526e-12	1.70767	up	WAPL
	796	ENSG00000111530	0.206985	3.83954161947767e-13	9.63579141110939e-12	1.48285	up	CAND1
	803	ENSG00000115816	0.251516	4.07167017047603e-13	1.01668681108133e-11	1.78866	up	CEBPZ
	804	ENSG00000187742	0.192356	4.50100935266951e-13	1.12106798273902e-11	1.37653	up	SECISBP2
	805	ENSG00000197312	0.373482	5.32292554985708e-13	1.31422567810045e-11	2.58328	up	DDI2
	806	ENSG00000178202	0.259362	5.3629884841963e-13	1.32247026974721e-11	1.83292	up	POGLUT3
	808	ENSG00000253352	0.283305	5.42291595469181e-13	1.33558672941267e-11	1.99358	up	TUG1
	809	ENSG00000163125	0.243988	5.70491009381047e-13	1.40329463424177e-11	1.72624	up	RPRD2
	811	ENSG00000158636	0.363344	6.30328090200452e-13	1.54664414805868e-11	2.50779	up	EMSY
	815	ENSG00000169967	0.372096	6.64020568144076e-13	1.62730182744431e-11	2.56418	up	MAP3K2
	817	ENSG00000144028	0.224539	6.66939699478365e-13	1.63042496693688e-11	1.58807	up	SNRNP200
	818	ENSG00000112739	0.238537	7.80997876586868e-13	1.89988514125291e-11	1.67878	up	PRPF4B
	819	ENSG00000177853	0.332777	8.23407825497868e-13	1.99814976111637e-11	2.30375	up	ZNF518A
	820	ENSG00000148690	0.191286	8.30314851666691e-13	2.01244770771929e-11	1.3531	up	FRA10AC1
	821	ENSG00000234493	0.340089	8.47010610240463e-13	2.05040688139529e-11	2.35067	up	RHOXF1P1
	823	ENSG00000119314	0.214488	8.60970220259626e-13	2.08165799839846e-11	1.5114	up	PTBP3
	825	ENSG00000104517	0.292867	8.81585153755055e-13	2.12890465996927e-11	2.03813	up	UBR5
	826	ENSG00000135315	0.437098	9.58274175469295e-13	2.30847433813539e-11	2.94969	up	CEP162
	830	ENSG00000134852	0.357652	1.10007463747287e-12	2.64364603182267e-11	2.44809	up	CLOCK
	831	ENSG00000174718	0.405602	1.13133174885116e-12	2.71547012744831e-11	2.74241	up	RESF1
	833	ENSG00000124383	0.181382	1.18649348401278e-12	2.83414696554666e-11	1.27586	up	MPHOSPH10
	835	ENSG00000138095	0.179756	1.19816880791316e-12	2.85859143028716e-11	1.26435	up	LRPPRC
	837	ENSG00000143514	0.238694	1.3015674864514e-12	3.0978243681135e-11	1.66416	up	TP53BP2
	838	ENSG00000196914	0.261917	1.41001500201209e-12	3.3478990934002e-11	1.81533	up	ARHGEF12
	841	ENSG00000184785	0.3209	1.5260577309577e-12	3.61476948315021e-11	2.19939	up	SMIM10
	846	ENSG00000136813	0.248104	1.53599621235101e-12	3.63396908187005e-11	1.72074	up	ECPAS
	847	ENSG00000083857	0.291819	1.5663638758608e-12	3.69259574349777e-11	2.0067	up	FAT1
	851	ENSG00000093000	0.249194	1.68237705566404e-12	3.9379938023135e-11	1.72491	up	NUP50
	852	ENSG00000174501	0.444643	1.68150432108365e-12	3.9379938023135e-11	2.95728	up	ANKRD36C
	853	ENSG00000119950	0.286843	1.79559696130901e-12	4.17975537883578e-11	1.9716	up	MXI1
	854	ENSG00000186660	0.301733	1.79620275535564e-12	4.17975537883578e-11	2.0668	up	ZFP91
	855	ENSG00000205339	0.231638	1.83875580359955e-12	4.27375997211778e-11	1.60513	up	IPO7
	859	ENSG00000163558	0.311802	1.87105550629868e-12	4.34374080420114e-11	2.13025	up	PRKCI
	860	ENSG00000053254	0.340229	1.93115251944816e-12	4.47801518720224e-11	2.30911	up	FOXN3
	861	ENSG00000109685	0.226901	2.05771925231631e-12	4.74928310784904e-11	1.56944	up	NSD2
	864	ENSG00000066654	0.26947	2.07311272785568e-12	4.77844205104147e-11	1.85254	up	THUMPD1
	869	ENSG00000141446	0.410057	2.07517331077711e-12	4.77844205104147e-11	2.7394	up	ESCO1
	871	ENSG00000184007	0.259799	2.19284516826477e-12	5.03186901690015e-11	1.78609	up	PTP4A2
	872	ENSG00000039560	0.381625	2.40564852738388e-12	5.48842206028915e-11	2.55764	up	RAI14
	876	ENSG00000110066	0.222141	2.43918968586821e-12	5.55216701630575e-11	1.53276	up	KMT5B
	877	ENSG00000144283	0.256961	2.49820910092456e-12	5.67998780217091e-11	1.76211	up	PKP4
	878	ENSG00000092439	0.319411	2.86022560646216e-12	6.47338274814141e-11	2.16051	up	TRPM7
	883	ENSG00000149084	0.290966	2.95598795789232e-12	6.68248771415884e-11	1.97867	up	HSD17B12
	884	ENSG00000177189	0.21013	2.97066984854718e-12	6.70802966028433e-11	1.44638	up	RPS6KA3
	888	ENSG00000055211	0.238791	3.13923893901806e-12	7.04853354529696e-11	1.6355	up	GINM1
	890	ENSG00000164346	0.285777	3.18181017466927e-12	7.13156076243266e-11	1.94187	up	NSA2
	891	ENSG00000171943	0.413415	3.45064374749493e-12	7.70410618669308e-11	2.73678	up	SRGAP2C
	892	ENSG00000152104	0.436027	3.61464278737826e-12	8.05212448343387e-11	2.86304	up	PTPN14
	896	ENSG00000215146	0.477548	3.64417298403832e-12	8.10879613709806e-11	3.10603	up	LOC441666
	899	ENSG00000129292	0.273794	3.65643450578192e-12	8.12695857753726e-11	1.85873	up	PHF20L1
	903	ENSG00000135541	0.29954	4.33774622113935e-12	9.59823176119517e-11	2.01796	up	AHI1
	910	ENSG00000074603	0.251353	4.45734554335726e-12	9.82995914823149e-11	1.70592	up	DPP8
	912	ENSG00000198042	0.179722	4.64923794115749e-12	1.02077288395779e-10	1.23092	up	MAK16
	913	ENSG00000156802	0.286663	5.15700028976198e-12	1.12354601917386e-10	1.92745	up	ATAD2
	916	ENSG00000121774	0.187057	5.31917996986872e-12	1.1563384000287e-10	1.27587	up	KHDRBS1
	918	ENSG00000155313	0.279798	5.3506417062872e-12	1.16190386055695e-10	1.88508	up	USP25
	919	ENSG00000117724	0.246433	6.14342848512088e-12	1.32969009984723e-10	1.66255	up	CENPF
	924	ENSG00000144724	0.264121	6.54274972351162e-12	1.41303437928476e-10	1.77125	up	PTPRG
	927	ENSG00000187109	0.336843	6.66793538678352e-12	1.43850366679402e-10	2.233	up	NAP1L1
	929	ENSG00000163510	0.293803	7.50194300369504e-12	1.60967015142054e-10	1.95878	up	CWC22
	930	ENSG00000092140	0.260537	7.92107876652122e-12	1.69410256337702e-10	1.74432	up	G2E3
	931	ENSG00000180329	0.260301	8.30078831368111e-12	1.77149008726633e-10	1.74171	up	CCDC43
	932	ENSG00000135090	0.280761	8.50036412667419e-12	1.81213138898325e-10	1.86899	up	TAOK3
	933	ENSG00000125885	0.228676	8.58295780133785e-12	1.82777359150724e-10	1.53596	up	MCM8
	935	ENSG00000070367	0.211018	8.79852359557261e-12	1.87166876401097e-10	1.4207	up	EXOC5
	936	ENSG00000111879	0.376934	8.85643536406755e-12	1.88196878379425e-10	2.46145	up	FAM184A
	937	ENSG00000096696	0.377923	8.94854105405538e-12	1.89747352874547e-10	2.46442	up	DSP
	939	ENSG00000139354	0.31153	9.24074042648231e-12	1.95733888563502e-10	2.06051	up	GAS2L3
	941	ENSG00000075568	0.342823	9.42143944362124e-12	1.99135883165495e-10	2.25124	up	TMEM131
	947	ENSG00000086300	0.256286	9.44918665784104e-12	1.99509664194203e-10	1.71047	up	SNX10
	949	ENSG00000198408	0.20109	9.48491371952336e-12	1.99838362809001e-10	1.35296	up	OGA
	950	ENSG00000169607	0.311006	1.03183468047298e-11	2.15565378030108e-10	2.05263	up	CKAP2L
	951	ENSG00000179981	0.320453	1.05023671681969e-11	2.19178875238601e-10	2.11116	up	TSHZ1
	954	ENSG00000168280	0.269908	1.10825428077114e-11	2.31043631656874e-10	1.79164	up	KIF5C
	955	ENSG00000115464	0.375674	1.12829626299555e-11	2.34482198219598e-10	2.44243	up	USP34
	956	ENSG00000198554	0.322919	1.15417019764823e-11	2.39608150142135e-10	2.12072	up	WDHD1
	959	ENSG00000039123	0.205044	1.18613241927709e-11	2.45985997328321e-10	1.37238	up	MTREX
	960	ENSG00000134744	0.270216	1.23707898434674e-11	2.55748987942216e-10	1.79027	up	TUT4
	962	ENSG00000206560	0.29839	1.28059355398976e-11	2.6446924793126e-10	1.9637	up	ANKRD28
	965	ENSG00000091009	0.323196	1.37318092272226e-11	2.83000883304485e-10	2.11607	up	RBM27
	969	ENSG00000114857	0.294388	1.4593789628351e-11	2.99613685833625e-10	1.9364	up	NKTR
	970	ENSG00000119927	0.327908	1.47876047504185e-11	3.02558360971927e-10	2.14356	up	GPAM
	971	ENSG00000138083	0.372428	1.53834544657495e-11	3.14425121894793e-10	2.40751	up	SIX3
	972	ENSG00000136874	0.319504	1.68635956139776e-11	3.44323014050174e-10	2.08436	up	STX17
	973	ENSG00000183943	0.354867	1.74272784619069e-11	3.55466278586179e-10	2.29578	up	PRKX
	976	ENSG00000152818	0.227759	1.74759509622698e-11	3.55727108601604e-10	1.50675	up	UTRN
	977	ENSG00000146463	0.356859	1.8452558465382e-11	3.74836500137976e-10	2.30417	up	ZMYM4
	978	ENSG00000067248	0.218756	1.8569131014089e-11	3.76818415031042e-10	1.4472	up	DHX29
	979	ENSG00000206418	0.541271	1.87887407301156e-11	3.80885044698643e-10	3.33133	up	RAB12
	983	ENSG00000143494	0.347583	1.88705559728191e-11	3.82152852622177e-10	2.25145	up	VASH2
	984	ENSG00000143970	0.28448	1.96566243886494e-11	3.96451917730787e-10	1.86058	up	ASXL2
	985	ENSG00000104067	0.297645	1.97212579765033e-11	3.97351281140401e-10	1.94164	up	TJP1
	987	ENSG00000073792	0.26873	1.99010829014777e-11	4.00161125359733e-10	1.76174	up	IGF2BP2
	988	ENSG00000065361	0.216462	2.02427427203918e-11	4.06618659751254e-10	1.42988	up	ERBB3
	990	ENSG00000102038	0.237776	2.06550548581161e-11	4.14480888276326e-10	1.56458	up	SMARCA1
	992	ENSG00000116991	0.259884	2.15008059507115e-11	4.30580786645259e-10	1.70313	up	SIPA1L2
	993	ENSG00000101752	0.386617	2.19144218725218e-11	4.37979161335299e-10	2.46899	up	MIB1
	995	ENSG00000085760	0.180425	2.28534926586094e-11	4.56287356948227e-10	1.1941	up	MTIF2
	997	ENSG00000120800	0.265856	2.31374329345728e-11	4.61027884784764e-10	1.74054	up	UTP20
	1003	ENSG00000092201	0.217168	2.38017498144336e-11	4.73313432117312e-10	1.42925	up	SUPT16H
	1004	ENSG00000135040	0.238849	2.59633000716164e-11	5.13208760937055e-10	1.56465	up	NAA35
	1005	ENSG00000185561	0.502786	2.61994080050025e-11	5.17360023015119e-10	3.11174	up	TLCD2
	1008	ENSG00000124098	0.261669	2.73014575412267e-11	5.38585768370507e-10	1.706	up	FAM210B
	1011	ENSG00000113318	0.370688	2.88237952962007e-11	5.66925164228645e-10	2.3639	up	MSH3
	1012	ENSG00000164754	0.161414	3.02647074922835e-11	5.93499595194868e-10	1.0638	up	RAD21
	1019	ENSG00000184661	0.322753	3.093061957898e-11	6.05958956297289e-10	2.07451	up	CDCA2
	1020	ENSG00000090889	0.234044	3.36186991907627e-11	6.54096496718412e-10	1.52414	up	KIF4A
	1024	ENSG00000133104	0.181986	3.37654500566009e-11	6.56307659629578e-10	1.19402	up	SPART
	1025	ENSG00000130818	0.3255	3.56321078131989e-11	6.8988493115672e-10	2.08693	up	ZNF426
	1026	ENSG00000129317	0.310093	3.72269493169442e-11	7.2005999722706e-10	1.99212	up	PUS7L
	1027	ENSG00000112159	0.299227	3.90983665385558e-11	7.55520677381489e-10	1.92085	up	MDN1
	1031	ENSG00000100523	0.390886	4.1262936877433e-11	7.95999763177582e-10	2.45528	up	DDHD1
	1035	ENSG00000090621	0.264413	4.51925136948289e-11	8.6904633997447e-10	1.70372	up	PABPC4
	1037	ENSG00000186522	0.295799	4.73960490102357e-11	9.0828926407063e-10	1.89395	up	SEPTIN10
	1038	ENSG00000114302	0.315567	4.99673106939182e-11	9.55305594809666e-10	2.00982	up	PRKAR2A
	1041	ENSG00000234545	0.189439	5.20455811976709e-11	9.9408062892584e-10	1.23013	up	FAM133B
	1042	ENSG00000154174	0.338208	5.37834622185975e-11	1.02431404605755e-09	2.14119	up	TOMM70
	1044	ENSG00000116962	0.291555	5.57788368434538e-11	1.06129675552621e-09	1.86068	up	NID1
	1045	ENSG00000151690	0.33518	5.88341762813891e-11	1.11692376181803e-09	2.11992	up	MFSD6
	1049	ENSG00000258890	0.365026	5.88714481539312e-11	1.11692376181803e-09	2.29336	up	CEP95
	1052	ENSG00000005020	0.277166	6.14430890078759e-11	1.16126852494771e-09	1.76954	up	SKAP2
	1062	ENSG00000139746	0.393387	6.66586669796371e-11	1.25624974480826e-09	2.4496	up	RBM26
	1064	ENSG00000086758	0.214078	7.4877333249115e-11	1.39785123257717e-09	1.37365	up	HUWE1
	1065	ENSG00000178105	0.294608	7.64717358749453e-11	1.42493292806078e-09	1.86553	up	DDX10
	1066	ENSG00000143702	0.331731	7.79866892777847e-11	1.45179727851771e-09	2.08709	up	CEP170
	1071	ENSG00000014123	0.311625	8.08509354072641e-11	1.50370604632685e-09	1.96494	up	UFL1
	1075	ENSG00000143971	0.296055	8.40458834525444e-11	1.55582977155009e-09	1.87135	up	ETAA1
	1076	ENSG00000039650	0.320657	8.97486338194405e-11	1.65521526893416e-09	2.01273	up	PNKP
	1077	ENSG00000134748	0.232374	9.07134323386942e-11	1.67145400515516e-09	1.48111	up	PRPF38A
	1084	ENSG00000174953	0.278968	9.10015043252436e-11	1.67520503691019e-09	1.76435	up	DHX36
	1085	ENSG00000078618	0.221081	1.01794800598976e-10	1.86179309656392e-09	1.40703	up	NRDC
	1086	ENSG00000118200	0.427242	1.03007106834488e-10	1.88222940101435e-09	2.61497	up	CAMSAP2
	1087	ENSG00000146263	0.325323	1.05148889630553e-10	1.91959657994046e-09	2.03456	up	MMS22L
	1088	ENSG00000164292	0.289922	1.05416929308864e-10	1.92095224308597e-09	1.82453	up	RHOBTB3
	1089	ENSG00000185551	0.275306	1.05412598568052e-10	1.92095224308597e-09	1.73576	up	NR2F2
	1091	ENSG00000107290	0.376523	1.06561578602906e-10	1.94002741724629e-09	2.32904	up	SETX
	1093	ENSG00000066777	0.341146	1.14959660744242e-10	2.08908362412038e-09	2.11989	up	ARFGEF1
	1094	ENSG00000123106	0.307249	1.17168394457048e-10	2.12532533257588e-09	1.92319	up	CCDC91
	1095	ENSG00000215301	0.180607	1.1837964400924e-10	2.1453334754362e-09	1.15148	up	DDX3X
	1100	ENSG00000023516	0.393091	1.19507137298113e-10	2.1618143285332e-09	2.41315	up	AKAP11
	1103	ENSG00000123684	0.377422	1.25924819518659e-10	2.26962315616086e-09	2.32479	up	LPGAT1
	1107	ENSG00000068784	0.288852	1.30607527498668e-10	2.34761998203862e-09	1.80876	up	SRBD1
	1110	ENSG00000102189	0.264148	1.41386951742881e-10	2.53219304901027e-09	1.65816	up	EEA1
	1111	ENSG00000187240	0.342082	1.5238076720336e-10	2.72171269421065e-09	2.11315	up	DYNC2H1
	1115	ENSG00000163781	0.258449	1.52958682329371e-10	2.72957590986688e-09	1.6206	up	TOPBP1
	1116	ENSG00000101557	0.187656	1.5933666682318e-10	2.8331917098084e-09	1.18717	up	USP14
	1120	ENSG00000272886	0.296243	1.65019770440694e-10	2.93161466734515e-09	1.84271	up	DCP1A
	1121	ENSG00000017797	0.215204	1.75776065254276e-10	3.11155024083149e-09	1.35351	up	RALBP1
	1122	ENSG00000187231	0.429113	1.76530305502385e-10	3.12211403826073e-09	2.58723	up	SESTD1
	1125	ENSG00000170381	0.351514	1.77359107877009e-10	3.13397653544525e-09	2.14936	up	SEMA3E
	1129	ENSG00000066027	0.27713	1.85307302658421e-10	3.26569118444965e-09	1.72512	up	PPP2R5A
	1130	ENSG00000116830	0.208919	2.03807498626458e-10	3.57899687136241e-09	1.31023	up	TTF2
	1131	ENSG00000131504	0.205184	2.06892176793501e-10	3.62995070540528e-09	1.28693	up	DIAPH1
	1132	ENSG00000174231	0.23483	2.16371061870791e-10	3.79290245150336e-09	1.46553	up	PRPF8
	1133	ENSG00000064726	0.250039	2.20265496747451e-10	3.85775948632063e-09	1.55615	up	BTBD1
	1134	ENSG00000159147	0.225918	2.25121937138402e-10	3.93933585675724e-09	1.41054	up	DONSON
	1137	ENSG00000180263	0.393243	2.28449720283463e-10	3.99404246414457e-09	2.37607	up	FGD6
	1138	ENSG00000110318	0.541126	2.31162659737497e-10	4.03080993135937e-09	3.14528	up	CEP126
	1139	ENSG00000071794	0.405984	2.3321308175084e-10	4.06298994621455e-09	2.44389	up	HLTF
	1140	ENSG00000112144	0.327555	2.34802232248882e-10	4.08708433412322e-09	2.00837	up	CILK1
	1143	ENSG00000103342	0.187407	2.45571098096139e-10	4.27078297443338e-09	1.17305	up	GSPT1
	1145	ENSG00000227437	0.597156	2.57208809513966e-10	4.46143644569019e-09	3.42794	up	RPS8P4
	1146	ENSG00000004487	0.198968	2.78039561446059e-10	4.81433392596468e-09	1.23989	up	KDM1A
	1147	ENSG00000166012	0.306319	2.92489647397795e-10	5.06012194529554e-09	1.8751	up	TAF1D
	1148	ENSG00000013375	0.235487	3.00727654421362e-10	5.19810503623185e-09	1.45821	up	PGM3
	1150	ENSG00000138767	0.313797	3.03501889346263e-10	5.24148820398869e-09	1.9151	up	CNOT6L
	1151	ENSG00000187079	0.412289	3.20052832252817e-10	5.51771082803856e-09	2.46109	up	TEAD1
	1152	ENSG00000198730	0.21199	3.20785036876689e-10	5.52552922773001e-09	1.31411	up	CTR9
	1155	ENSG00000198521	0.404107	3.31208370914306e-10	5.70011906401652e-09	2.41685	up	ZNF43
	1156	ENSG00000038427	0.357135	3.40601822628982e-10	5.84256583939129e-09	2.15628	up	VCAN
	1157	ENSG00000204789	0.52571	3.40664083039258e-10	5.84256583939129e-09	3.04641	up	NA
	1158	ENSG00000115306	0.24602	3.52821109697509e-10	6.04583519521419e-09	1.51266	up	SPTBN1
	1160	ENSG00000087301	0.373625	3.5325187694619e-10	6.04798938889048e-09	2.23827	up	TXNDC16
	1161	ENSG00000052126	0.274798	3.57247759570078e-10	6.10585696658308e-09	1.68394	up	PLEKHA5
	1162	ENSG00000117477	0.245012	3.60025115673782e-10	6.14802579099777e-09	1.51071	up	CCDC181
	1164	ENSG00000196247	0.445193	3.70562364143147e-10	6.32252102538901e-09	2.62785	up	ZNF107
	1165	ENSG00000196199	0.239239	3.72509296798736e-10	6.34481900200322e-09	1.47208	up	MPHOSPH8
	1166	ENSG00000147202	0.350076	3.80680710305064e-10	6.47843413090832e-09	2.10702	up	DIAPH2
	1168	ENSG00000012048	0.243331	3.8165718145925e-10	6.48832722175133e-09	1.49553	up	BRCA1
	1169	ENSG00000122482	0.37341	3.84719920627647e-10	6.53035714585936e-09	2.23951	up	ZNF644
	1171	ENSG00000198087	0.349089	3.91124391785047e-10	6.63338938539806e-09	2.1037	up	CD2AP
	1173	ENSG00000177565	0.264221	4.09455795440024e-10	6.93242579025953e-09	1.61551	up	TBL1XR1
	1175	ENSG00000101972	0.292655	4.28948666243518e-10	7.25007353533163e-09	1.77889	up	STAG2
	1176	ENSG00000165733	0.243384	4.38795099441129e-10	7.40387373746367e-09	1.49029	up	BMS1
	1177	ENSG00000114331	0.271475	4.4270548062822e-10	7.46350243106725e-09	1.65491	up	ACAP2
	1179	ENSG00000058056	0.257969	4.54450151812972e-10	7.65499465577229e-09	1.57614	up	USP13
	1180	ENSG00000076770	0.354769	4.60675361677061e-10	7.74669187498678e-09	2.13239	up	MBNL3
	1181	ENSG00000089048	0.291195	4.63858485606666e-10	7.79360875901506e-09	1.76676	up	ESF1
	1182	ENSG00000175029	0.301102	4.65706346980164e-10	7.81803051247141e-09	1.8211	up	CTBP2
	1184	ENSG00000145349	0.285363	4.66470388840525e-10	7.82423175055181e-09	1.73318	up	CAMK2D
	1185	ENSG00000125827	0.247252	4.7634753118153e-10	7.97640722399072e-09	1.50997	up	TMX4
	1189	ENSG00000181827	0.336917	5.06955453320091e-10	8.48177115402879e-09	2.02136	up	RFX7
	1190	ENSG00000005100	0.184706	5.26336509707577e-10	8.77640676321482e-09	1.13504	up	DHX33
	1192	ENSG00000085719	0.292111	5.31812873533962e-10	8.86027061402045e-09	1.76591	up	CPNE3
	1195	ENSG00000018510	0.223634	5.45020080461226e-10	9.06507392216802e-09	1.36599	up	AGPS
	1198	ENSG00000180370	0.240195	5.5072749995055e-10	9.13700704102058e-09	1.46344	up	PAK2
	1200	ENSG00000162614	0.436189	5.63062090851775e-10	9.31825460202612e-09	2.55328	up	NEXN
	1201	ENSG00000196323	0.322653	5.64368752770408e-10	9.33189027506672e-09	1.93693	up	ZBTB44
	1202	ENSG00000121879	0.344203	5.92666599791186e-10	9.78368693377191e-09	2.0517	up	PIK3CA
	1204	ENSG00000163006	0.33934	6.0158982381355e-10	9.92272865800952e-09	2.02744	up	CCDC138
	1208	ENSG00000155545	0.345777	6.11043024132774e-10	1.00621126923937e-08	2.06544	up	MIER3
	1210	ENSG00000090989	0.284185	6.33589958422931e-10	1.03986378441167e-08	1.71203	up	EXOC1
	1211	ENSG00000165209	0.416722	6.42392559533284e-10	1.05256817233941e-08	2.43971	up	STRBP
	1213	ENSG00000083312	0.271045	6.48622714413969e-10	1.061898756067e-08	1.63663	up	TNPO1
	1214	ENSG00000112531	0.265256	6.54530592545875e-10	1.06980408308446e-08	1.60275	up	QKI
	1215	ENSG00000155903	0.302817	6.59803624460872e-10	1.07576206073694e-08	1.81554	up	RASA2
	1218	ENSG00000156650	0.334568	6.59492404041418e-10	1.07576206073694e-08	1.99497	up	KAT6B
	1220	ENSG00000073711	0.375801	6.66195963081413e-10	1.08440075238523e-08	2.22289	up	PPP2R3A
	1226	ENSG00000060749	0.47742	6.78915081664025e-10	1.10329265648123e-08	2.75018	up	QSER1
	1229	ENSG00000050628	0.222829	7.42070228638277e-10	1.19904517954217e-08	1.35229	up	PTGER3
	1230	ENSG00000115020	0.352165	7.52661427796209e-10	1.21319231442989e-08	2.08633	up	PIKFYVE
	1231	ENSG00000164985	0.245885	7.52621702135017e-10	1.21319231442989e-08	1.48469	up	PSIP1
	1234	ENSG00000123983	0.258918	7.59851379086324e-10	1.22343572611187e-08	1.55988	up	ACSL3
	1236	ENSG00000121892	0.294637	7.82001919744141e-10	1.25639951870724e-08	1.76298	up	PDS5A
	1238	ENSG00000185869	0.398115	8.03743371934772e-10	1.28924078414068e-08	2.33346	up	ZNF829
	1239	ENSG00000186472	0.422587	8.58072715052306e-10	1.37526693649575e-08	2.45383	up	PCLO
	1241	ENSG00000083099	0.226916	8.60320333279439e-10	1.37665140658581e-08	1.3699	up	LYRM2
	1243	ENSG00000118193	0.402683	8.75340821602069e-10	1.39842926100585e-08	2.35026	up	KIF14
	1244	ENSG00000152942	0.281609	8.91100455753114e-10	1.42131598035086e-08	1.6832	up	RAD17
	1247	ENSG00000016391	0.203646	8.98129420554078e-10	1.43137571478337e-08	1.23096	up	CHDH
	1255	ENSG00000182568	0.27589	9.34559010931669e-10	1.4858513994171e-08	1.64821	up	SATB1
	1256	ENSG00000114346	0.232927	9.92804782880752e-10	1.56839423309911e-08	1.39914	up	ECT2
	1257	ENSG00000143442	0.277282	1.00273286215723e-09	1.58281701633195e-08	1.65287	up	POGZ
	1258	ENSG00000099337	0.360541	1.02998801624178e-09	1.62454593556162e-08	2.11641	up	KCNK6
	1260	ENSG00000100320	0.295776	1.03322695684506e-09	1.62835911338714e-08	1.75738	up	RBFOX2
	1264	ENSG00000141367	0.23707	1.04677219468595e-09	1.64708774062252e-08	1.42117	up	CLTC
	1265	ENSG00000137812	0.478327	1.0704517603914e-09	1.6790171361962e-08	2.72221	up	KNL1
	1269	ENSG00000174373	0.463055	1.07323854001483e-09	1.68205749362325e-08	2.65561	up	RALGAPA1
	1270	ENSG00000103994	0.227834	1.12504716156917e-09	1.75769779552958e-08	1.36504	up	ZNF106
	1271	ENSG00000116560	0.152671	1.13692714856725e-09	1.77485965728301e-08	0.922739	up	SFPQ
	1273	ENSG00000176105	0.387047	1.14227712852038e-09	1.78180852478717e-08	2.25276	up	YES1
	1274	ENSG00000119547	0.475598	1.14964461373581e-09	1.79048343377268e-08	2.7093	up	ONECUT2
	1277	ENSG00000140534	0.313118	1.20074713909388e-09	1.86860382885991e-08	1.84571	up	TICRR
	1279	ENSG00000156970	0.194062	1.25245844731068e-09	1.94449813440733e-08	1.1645	up	BUB1B
	1280	ENSG00000073417	0.216832	1.27621096764893e-09	1.97827667276057e-08	1.29622	up	PDE8A
	1284	ENSG00000147548	0.285079	1.29586905977219e-09	2.00599249232407e-08	1.68632	up	NSD3
	1285	ENSG00000198862	0.415868	1.30301294298618e-09	2.01300761383472e-08	2.39063	up	LTN1
	1286	ENSG00000124541	0.166284	1.31249864074566e-09	2.02502708571389e-08	1.00009	up	RRP36
	1288	ENSG00000138829	0.317304	1.32350542704927e-09	2.04042135277441e-08	1.86281	up	FBN2
	1290	ENSG00000068366	0.382558	1.35054664878129e-09	2.07887716294549e-08	2.2186	up	ACSL4
	1291	ENSG00000138688	0.450016	1.40929268729408e-09	2.16594083862732e-08	2.55999	up	BLTP1
	1296	ENSG00000074181	0.294481	1.44139679450039e-09	2.21356567372307e-08	1.73212	up	NOTCH3
	1300	ENSG00000248092	0.240102	1.58959847213871e-09	2.43174223060356e-08	1.42323	up	NA
	1301	ENSG00000110090	0.27324	1.65809709160372e-09	2.5287256106258e-08	1.60874	up	CPT1A
	1302	ENSG00000141429	0.402461	1.66195994399554e-09	2.53266855108805e-08	2.30956	up	GALNT1
	1303	ENSG00000006468	0.424989	1.70016199111415e-09	2.58769787614857e-08	2.43011	up	ETV1
	1304	ENSG00000164902	0.215267	1.70068109180953e-09	2.58769787614857e-08	1.2783	up	PHAX
	1305	ENSG00000006634	0.197651	1.73197960472642e-09	2.6332996658977e-08	1.17582	up	DBF4
	1313	ENSG00000021776	0.285899	1.74385303789396e-09	2.64932033174602e-08	1.6773	up	AQR
	1314	ENSG00000186854	0.345459	1.94832210545561e-09	2.9419218631198e-08	1.99898	up	TRABD2A
	1316	ENSG00000122484	0.450442	1.99702896264327e-09	3.01088184132057e-08	2.54223	up	RPAP2
	1318	ENSG00000138246	0.372626	1.99942095258065e-09	3.01219755363708e-08	2.1391	up	DNAJC13
	1319	ENSG00000145362	0.408187	2.05645341141437e-09	3.09341770369508e-08	2.31794	up	ANK2
	1320	ENSG00000128923	0.433864	2.11830541794917e-09	3.18404270024718e-08	2.45452	up	MINDY2
	1321	ENSG00000196418	0.33323	2.12250388891062e-09	3.18793652284409e-08	1.93043	up	ZNF124
	1322	ENSG00000151806	0.282313	2.13763989927038e-09	3.20823986698975e-08	1.64935	up	GUF1
	1323	ENSG00000197860	0.427066	2.1568671873503e-09	3.23464817370704e-08	2.42135	up	SGTB
	1326	ENSG00000261236	0.218346	2.18715891103498e-09	3.27759732200904e-08	1.28681	up	BOP1
	1327	ENSG00000170088	0.344261	2.34728435089259e-09	3.50959725043715e-08	1.98212	up	TMEM192
	1329	ENSG00000127328	0.245434	2.39521449448874e-09	3.57856236380813e-08	1.43768	up	RAB3IP
	1331	ENSG00000089916	0.280469	2.41070118841638e-09	3.59357607229648e-08	1.63422	up	GPATCH2L
	1332	ENSG00000168538	0.308585	2.46689254670169e-09	3.67457638098481e-08	1.78608	up	TRAPPC11
	1333	ENSG00000139083	0.370086	2.51513409360654e-09	3.74362226275099e-08	2.11297	up	ETV6
	1336	ENSG00000152409	0.369289	2.53768636466846e-09	3.77420784536983e-08	2.10472	up	JMY
	1337	ENSG00000129680	0.303509	2.7154122802784e-09	4.02962304407183e-08	1.75415	up	MAP7D3
	1338	ENSG00000171940	0.300964	2.72980141040174e-09	4.04794635472138e-08	1.73835	up	ZNF217
	1341	ENSG00000147421	0.345498	2.75202919569258e-09	4.07785731194328e-08	1.97919	up	HMBOX1
	1342	ENSG00000082701	0.327807	2.88260350558635e-09	4.26178203592505e-08	1.8827	up	GSK3B
	1344	ENSG00000213468	0.332316	2.8937346379226e-09	4.27505088907998e-08	1.90901	up	FIRRE
	1349	ENSG00000166025	0.290121	2.89775967555126e-09	4.276682715534e-08	1.67765	up	AMOTL1
	1351	ENSG00000144224	0.228708	2.93657946762941e-09	4.31583576910458e-08	1.3353	up	UBXN4
	1352	ENSG00000119969	0.178064	3.00918105728021e-09	4.41598990685696e-08	1.0458	up	HELLS
	1356	ENSG00000037757	0.359191	3.01243621696297e-09	4.41749707378017e-08	2.05018	up	MRI1
	1359	ENSG00000116698	0.226695	3.35732572296482e-09	4.90510978507741e-08	1.31889	up	SMG7
	1364	ENSG00000092421	0.268314	3.40187975271921e-09	4.96288947589485e-08	1.55032	up	SEMA6A
	1368	ENSG00000118689	0.266964	3.53156280840503e-09	5.13319385919634e-08	1.54082	up	FOXO3
	1370	ENSG00000127946	0.274185	3.70645893922506e-09	5.37341143735663e-08	1.57961	up	HIP1
	1371	ENSG00000091039	0.344005	3.79411577835306e-09	5.48666920484802e-08	1.95405	up	OSBPL8
	1374	ENSG00000100578	0.403351	3.79412058904803e-09	5.48666920484802e-08	2.26122	up	KIAA0586
	1375	ENSG00000164168	0.39624	3.88713897529857e-09	5.60890955780709e-08	2.22983	up	TMEM184C
	1376	ENSG00000112305	0.252404	3.90896691273679e-09	5.63630385541233e-08	1.45708	up	SMAP1
	1385	ENSG00000122591	0.264082	3.91356557328932e-09	5.63883365232806e-08	1.52097	up	HYCC1
	1387	ENSG00000181192	0.213341	4.38777674349893e-09	6.28101528639782e-08	1.23409	up	DHTKD1
	1388	ENSG00000250565	0.317873	4.44896255420422e-09	6.35941828404131e-08	1.80813	up	ATP6V1E2
	1393	ENSG00000133703	0.214526	4.47858979283418e-09	6.39715570840997e-08	1.24031	up	KRAS
	1394	ENSG00000198722	0.286001	4.83563435060767e-09	6.88236084961577e-08	1.6301	up	UNC13B
	1396	ENSG00000110013	0.221423	4.84482766534047e-09	6.89049880150934e-08	1.27569	up	SIAE
	1399	ENSG00000100815	0.25516	4.94819581415683e-09	7.02743053090783e-08	1.46333	up	TRIP11
	1401	ENSG00000095002	0.225401	5.03557406896024e-09	7.13618952760584e-08	1.29689	up	MSH2
	1403	ENSG00000149311	0.277583	5.22847190412208e-09	7.39897815639717e-08	1.58286	up	ATM
	1404	ENSG00000186871	0.413496	5.32073865088402e-09	7.51881429026561e-08	2.29019	up	ERCC6L
	1405	ENSG00000051825	0.328319	5.49245660831699e-09	7.75594335587554e-08	1.85238	up	MPHOSPH9
	1407	ENSG00000101639	0.383344	5.50316330821469e-09	7.7655313700117e-08	2.13464	up	CEP192
	1408	ENSG00000133657	0.30029	5.678452814289e-09	8.00149292793842e-08	1.70095	up	ATP13A3
	1410	ENSG00000198677	0.348994	5.6944839516463e-09	8.01838343929968e-08	1.95809	up	SKIC3
	1412	ENSG00000178074	0.298567	5.74708035838928e-09	8.08096561598765e-08	1.69198	up	C2orf69
	1413	ENSG00000149948	0.348328	5.79920280865414e-09	8.14270502014001e-08	1.95446	up	HMGA2
	1414	ENSG00000140443	0.276216	5.91965065895936e-09	8.30594437116265e-08	1.56895	up	IGF1R
	1415	ENSG00000112414	0.34275	6.07070822960133e-09	8.50976682086347e-08	1.92273	up	ADGRG6
	1421	ENSG00000164944	0.315427	6.07349947116e-09	8.50976682086347e-08	1.77794	up	VIRMA
	1423	ENSG00000167325	0.22405	6.75298814104132e-09	9.4218679017794e-08	1.27837	up	RRM1
	1424	ENSG00000112893	0.283492	7.04495979459942e-09	9.8154162254201e-08	1.59974	up	MAN2A1
	1425	ENSG00000079387	0.359079	7.11683962814027e-09	9.90859989238125e-08	1.99598	up	SENP1
	1426	ENSG00000078747	0.345189	7.12452479846927e-09	9.91233885294399e-08	1.92522	up	ITCH
	1427	ENSG00000011454	0.347941	7.13041863355141e-09	9.91358203567954e-08	1.93874	up	RABGAP1
	1428	ENSG00000185630	0.413406	7.19790046301905e-09	1.00003906503024e-07	2.26933	up	PBX1
	1430	ENSG00000112419	0.473855	7.25203206726376e-09	1.00685425606142e-07	2.56558	up	PHACTR2
	1431	ENSG00000166450	0.491321	7.44281992998541e-09	1.03189753798525e-07	2.63992	up	PRTG
	1432	ENSG00000118058	0.309921	7.46409119895403e-09	1.03352182807286e-07	1.73798	up	KMT2A
	1433	ENSG00000141646	0.233088	7.46496145364844e-09	1.03352182807286e-07	1.32384	up	SMAD4
	1434	ENSG00000198642	0.214152	7.47916012561651e-09	1.03476502896352e-07	1.22025	up	KLHL9
	1435	ENSG00000114416	0.229566	7.58949304389944e-09	1.04929769238738e-07	1.30452	up	FXR1
	1437	ENSG00000197579	0.354243	7.87188408624896e-09	1.08758169960956e-07	1.96628	up	TOPORS
	1438	ENSG00000115750	0.302454	8.1145911868713e-09	1.1195538265199e-07	1.6951	up	TAF1B
	1439	ENSG00000183495	0.267071	8.25187298534274e-09	1.13770259949517e-07	1.50453	up	EP400
	1440	ENSG00000152484	0.34133	8.30368386685155e-09	1.14405028731201e-07	1.89948	up	USP12
	1442	ENSG00000153339	0.367126	8.34649763938802e-09	1.14915043193407e-07	2.02827	up	TRAPPC8
	1443	ENSG00000102554	0.387886	8.45379976142346e-09	1.16230952891804e-07	2.13029	up	KLF5
	1447	ENSG00000115524	0.232475	8.78669670022682e-09	1.20724219527857e-07	1.31468	up	SF3B1
	1448	ENSG00000171517	0.294792	9.31739957771632e-09	1.27661896356464e-07	1.6486	up	LPAR3
	1449	ENSG00000024526	0.259145	9.3245388960066e-09	1.27671483530543e-07	1.45745	up	DEPDC1
	1451	ENSG00000121749	0.269277	9.41537828788228e-09	1.28826287050072e-07	1.51114	up	TBC1D15
	1452	ENSG00000074054	0.311631	9.48879209721482e-09	1.29651820895507e-07	1.73375	up	CLASP1
	1455	ENSG00000106299	0.318076	9.60899627316093e-09	1.31203829278022e-07	1.76779	up	WASL
	1456	ENSG00000138594	0.303334	9.73104635882447e-09	1.32596374646085e-07	1.69062	up	TMOD3
	1457	ENSG00000188042	0.286248	9.89030035903494e-09	1.34673828927353e-07	1.6005	up	ARL4C
	1461	ENSG00000236824	1.09143	9.92065519749639e-09	1.3499444745749e-07	4.75917	up	BCYRN1
	1462	ENSG00000277443	0.292372	1.02691637990729e-08	1.39354169391115e-07	1.62978	up	MARCKS
	1463	ENSG00000138190	0.235037	1.03745082710877e-08	1.40687415172766e-07	1.32257	up	EXOC6
	1464	ENSG00000198919	0.380782	1.0403325368904e-08	1.40981769490014e-07	2.08463	up	DZIP3
	1471	ENSG00000116678	0.453747	1.04157326248388e-08	1.41053493866157e-07	2.44099	up	LEPR
	1474	ENSG00000135414	0.312946	1.09481288821141e-08	1.47557853988303e-07	1.73617	up	GDF11
	1475	ENSG00000136861	0.265399	1.12093189324169e-08	1.50770662926796e-07	1.48204	up	CDK5RAP2
	1477	ENSG00000148498	0.315834	1.13694860916102e-08	1.52821309323568e-07	1.74699	up	PARD3
	1480	ENSG00000135862	0.247326	1.16040617038702e-08	1.55763119391287e-07	1.38391	up	LAMC1
	1485	ENSG00000141027	0.194308	1.19851333365671e-08	1.60552198331607e-07	1.09462	up	NCOR1
	1486	ENSG00000137492	0.319655	1.30255817598598e-08	1.73902480788539e-07	1.76056	up	THAP12
	1489	ENSG00000183530	0.364927	1.30820557395765e-08	1.74538921327621e-07	1.99019	up	PRR14L
	1493	ENSG00000112146	0.222301	1.36801706847346e-08	1.82151151105137e-07	1.24268	up	FBXO9
	1494	ENSG00000138160	0.250664	1.44539982823742e-08	1.91939028765138e-07	1.39306	up	KIF11
	1497	ENSG00000123607	0.293599	1.44988808298808e-08	1.92406165551015e-07	1.62098	up	TTC21B
	1498	ENSG00000075539	0.364453	1.46511177307822e-08	1.94036780314287e-07	1.97712	up	FRYL
	1499	ENSG00000154305	0.336734	1.46785407497967e-08	1.94270192860794e-07	1.84198	up	MIA3
	1502	ENSG00000115977	0.323346	1.50332058783375e-08	1.9883144746092e-07	1.77103	up	AAK1
	1504	ENSG00000137770	0.230214	1.548296683737e-08	2.04371038959852e-07	1.28046	up	CTDSPL2
	1509	ENSG00000163349	0.29703	1.59896405969075e-08	2.10778334091947e-07	1.63239	up	HIPK1
	1510	ENSG00000147044	0.321199	1.66822753725585e-08	2.19180113675511e-07	1.75359	up	CASK
	1514	ENSG00000133639	0.270583	1.67412724325497e-08	2.19809580958761e-07	1.49163	up	BTG1
	1515	ENSG00000115159	0.336565	1.74994025110151e-08	2.29156640808048e-07	1.82677	up	GPD2
	1516	ENSG00000196705	0.483053	1.76324695788473e-08	2.30746760310381e-07	2.54017	up	ZNF431
	1518	ENSG00000176208	0.491955	1.79484714891194e-08	2.3472717397314e-07	2.57537	up	ATAD5
	1520	ENSG00000165434	0.353575	1.8226701189186e-08	2.38051764016338e-07	1.91326	up	PGM2L1
	1521	ENSG00000105176	0.222655	1.83238822733353e-08	2.39006111809964e-07	1.23315	up	URI1
	1522	ENSG00000113194	0.241991	1.83952767118155e-08	2.39779589801744e-07	1.33667	up	FAF2
	1523	ENSG00000171262	0.244245	1.853068807239e-08	2.41385953826021e-07	1.34826	up	FAM98B
	1524	ENSG00000137601	0.421645	1.85567629764521e-08	2.41566896107117e-07	2.24676	up	NEK1
	1526	ENSG00000215105	0.724465	1.8618829478485e-08	2.4221582233625e-07	3.48681	up	NA
	1527	ENSG00000134874	0.366874	1.88598433800138e-08	2.45029655866417e-07	1.97972	up	DZIP1
	1528	ENSG00000249395	0.353457	1.924300171183e-08	2.49843976384245e-07	1.91173	up	CASC9
	1529	ENSG00000150938	0.356239	1.92593226488781e-08	2.49892232222944e-07	1.91993	up	CRIM1
	1530	ENSG00000100811	0.186585	1.93423892043275e-08	2.50805891671025e-07	1.03674	up	YY1
	1531	ENSG00000148516	0.356652	1.94079434093744e-08	2.5149142878056e-07	1.92502	up	ZEB1
	1534	ENSG00000139946	0.284763	1.97686764861607e-08	2.55998549976892e-07	1.55799	up	PELI2
	1535	ENSG00000130224	0.423045	2.02630886728148e-08	2.61887872247213e-07	2.25003	up	LRCH2
	1536	ENSG00000138180	0.290796	2.02801813054457e-08	2.61938029030466e-07	1.58886	up	CEP55
	1540	ENSG00000119729	0.378443	2.05223891177637e-08	2.64893806411968e-07	2.03204	up	RHOQ
	1541	ENSG00000132953	0.264346	2.07721458509985e-08	2.6742114522201e-07	1.45023	up	XPO4
	1544	ENSG00000054267	0.30079	2.13619471222627e-08	2.74835797304336e-07	1.63781	up	ARID4B
	1545	ENSG00000072571	0.238886	2.20194087454446e-08	2.82744040017607e-07	1.3129	up	HMMR
	1546	ENSG00000025293	0.254915	2.20431324746125e-08	2.8274830218725e-07	1.39768	up	PHF20
	1547	ENSG00000151466	0.310723	2.20482636528543e-08	2.8274830218725e-07	1.68879	up	SCLT1
	1549	ENSG00000266074	0.349212	2.24750842565351e-08	2.88035565914716e-07	1.87737	up	BAHCC1
	1552	ENSG00000131747	0.242901	2.27245001404043e-08	2.90668348247519e-07	1.33272	up	TOP2A
	1553	ENSG00000134086	0.285636	2.31102533661486e-08	2.95221574250814e-07	1.55559	up	VHL
	1554	ENSG00000177119	0.27094	2.32946607799052e-08	2.97385669428462e-07	1.47871	up	ANO6
	1556	ENSG00000151835	0.431846	2.37292598235093e-08	3.02738935174322e-07	2.27855	up	SACS
	1562	ENSG00000183684	0.243715	2.4327008395909e-08	3.09767031764477e-07	1.33412	up	ALYREF
	1565	ENSG00000115415	0.227587	2.53550303589388e-08	3.21823836041179e-07	1.24706	up	STAT1
	1566	ENSG00000138658	0.404505	2.5686836750108e-08	3.25410367672615e-07	2.14301	up	ZGRF1
	1570	ENSG00000135829	0.220961	2.6131183815003e-08	3.30828129193007e-07	1.21117	up	DHX9
	1571	ENSG00000141404	0.715669	2.72478447877288e-08	3.44086478192045e-07	3.43557	up	GNAL
	1572	ENSG00000173960	0.279368	2.72848544972558e-08	3.4433451639885e-07	1.51603	up	UBXN2A
	1578	ENSG00000091409	0.290653	2.76759778378714e-08	3.49048305733866e-07	1.57178	up	ITGA6
	1580	ENSG00000126001	0.311429	2.94718098227865e-08	3.70283968026975e-07	1.67446	up	CEP250
	1584	ENSG00000133710	0.696765	3.04897308728376e-08	3.82588230560049e-07	3.32895	up	SPINK5
	1585	ENSG00000048649	0.268966	3.125542224175e-08	3.9120580894251e-07	1.4552	up	RSF1
	1586	ENSG00000121274	0.286292	3.13460001606602e-08	3.92091986867665e-07	1.54437	up	TENT4B
	1588	ENSG00000107485	0.398988	3.15139611215168e-08	3.9394438410794e-07	2.10162	up	GATA3
	1589	ENSG00000174799	0.331753	3.1797217141433e-08	3.96984651792223e-07	1.77368	up	CEP135
	1590	ENSG00000196437	0.460475	3.20335249211222e-08	3.9968323793969e-07	2.39219	up	ZNF569
	1592	ENSG00000153560	0.267271	3.20943297047764e-08	4.00190050771633e-07	1.44487	up	UBP1
	1593	ENSG00000005436	0.299182	3.32219218994191e-08	4.13210679785372e-07	1.60787	up	GCFC2
	1594	ENSG00000137497	0.291662	3.3202635847213e-08	4.13210679785372e-07	1.56843	up	NUMA1
	1595	ENSG00000164684	0.35123	3.31904342600067e-08	4.13210679785372e-07	1.86578	up	ZNF704
	1596	ENSG00000108424	0.312417	3.35885657214063e-08	4.17509030716365e-07	1.67345	up	KPNB1
	1598	ENSG00000073050	0.289272	3.39838510879294e-08	4.22157789266472e-07	1.55458	up	XRCC1
	1600	ENSG00000119471	0.265459	3.51271181265981e-08	4.35813669573175e-07	1.43183	up	HSDL2
	1605	ENSG00000153827	0.308699	3.58631313667838e-08	4.4438902654866e-07	1.65086	up	TRIP12
	1607	ENSG00000163428	0.30646	3.73756881753548e-08	4.61688718856439e-07	1.63855	up	LRRC58
	1608	ENSG00000111142	0.216902	3.89429700074504e-08	4.80450107882832e-07	1.17447	up	METAP2
	1609	ENSG00000143469	0.523772	3.94839984634062e-08	4.86821986029534e-07	2.65722	up	SYT14
	1610	ENSG00000014138	0.294956	3.99818839474283e-08	4.92654338807777e-07	1.57579	up	POLA2
	1612	ENSG00000205189	0.256647	4.00292898173567e-08	4.92932111750878e-07	1.37987	up	ZBTB10
	1615	ENSG00000289353	0.432535	4.07267659429292e-08	5.00898797509004e-07	2.2507	up	NA
	1619	ENSG00000117139	0.336245	4.16218702336218e-08	5.10956779722467e-07	1.78026	up	KDM5B
	1620	ENSG00000169554	0.382469	4.35854326848309e-08	5.33739832247966e-07	2.00286	up	ZEB2
	1622	ENSG00000180530	0.556722	4.39984031943652e-08	5.38464408476225e-07	2.76939	up	NRIP1
	1623	ENSG00000125257	0.293747	4.44320815868974e-08	5.43101386893852e-07	1.56353	up	ABCC4
	1625	ENSG00000006459	0.346463	4.44998977247851e-08	5.43595177012686e-07	1.82408	up	KDM7A
	1632	ENSG00000104093	0.348163	4.60480470522169e-08	5.61814511296771e-07	1.829	up	DMXL2
	1634	ENSG00000137941	0.46225	4.72016736427615e-08	5.7341935149595e-07	2.36693	up	TTLL7
	1635	ENSG00000112320	0.33465	4.93275557250326e-08	5.97780024330377e-07	1.76226	up	SOBP
	1637	ENSG00000196950	0.296099	4.93049401072785e-08	5.97780024330377e-07	1.57133	up	SLC39A10
	1646	ENSG00000152457	0.350632	4.9512094924005e-08	5.99649843593966e-07	1.8417	up	DCLRE1C
	1650	ENSG00000188158	0.363395	5.20237759126412e-08	6.26456132684235e-07	1.8942	up	NHS
	1651	ENSG00000165392	0.381459	5.27759333074541e-08	6.34142820456719e-07	1.98266	up	WRN
	1653	ENSG00000174738	0.382527	5.33408509941734e-08	6.40542526838572e-07	1.98755	up	NR1D2
	1654	ENSG00000153936	0.286338	5.4867209997708e-08	6.58074594927137e-07	1.51729	up	HS2ST1
	1655	ENSG00000139697	0.254217	5.54341306912005e-08	6.64472234028864e-07	1.35349	up	SBNO1
	1657	ENSG00000082516	0.33443	5.585015647761e-08	6.69054502915465e-07	1.75393	up	GEMIN5
	1658	ENSG00000087502	0.209169	5.66861986969403e-08	6.782501963582e-07	1.12029	up	ERGIC2
	1660	ENSG00000048405	0.403608	5.70243617185127e-08	6.81884798209429e-07	2.08351	up	ZNF800
	1661	ENSG00000146872	0.235573	5.78319329489337e-08	6.90708375087687e-07	1.25598	up	TLK2
	1662	ENSG00000125772	0.283399	5.85263250621822e-08	6.9858092756341e-07	1.4975	up	GPCPD1
	1666	ENSG00000082805	0.366338	5.86453512631401e-08	6.99580465790022e-07	1.90448	up	ERC1
	1670	ENSG00000168172	0.361267	5.94335740582972e-08	7.07280935942257e-07	1.88046	up	HOOK3
	1671	ENSG00000133812	0.300905	6.04479408954973e-08	7.17629267182113e-07	1.58395	up	SBF2
	1672	ENSG00000111581	0.27653	6.06898440532226e-08	7.20069927109031e-07	1.46199	up	NUP107
	1680	ENSG00000054523	0.315036	6.15283820259416e-08	7.29582357683205e-07	1.65278	up	KIF1B
	1681	ENSG00000102595	0.208636	6.47549080310433e-08	7.64185003942539e-07	1.11155	up	UGGT2
	1686	ENSG00000163807	0.216039	6.50011273097861e-08	7.6663435457693e-07	1.15118	up	KIAA1143
	1687	ENSG00000157500	0.243827	6.82995338761591e-08	8.03147425046697e-07	1.29124	up	APPL1
	1690	ENSG00000270816	0.352593	6.87368960452205e-08	8.07811322461495e-07	1.83161	up	LINC00221
	1691	ENSG00000117528	0.259252	7.04869744781395e-08	8.26908139647097e-07	1.36842	up	ABCD3
	1693	ENSG00000170558	0.302304	7.06277286345311e-08	8.28069395569612e-07	1.58331	up	CDH2
	1696	ENSG00000090686	0.242219	7.29032672143423e-08	8.53739028819581e-07	1.27986	up	USP48
	1703	ENSG00000112062	0.311904	7.59583448955937e-08	8.879423030071e-07	1.62616	up	MAPK14
	1705	ENSG00000163602	0.432176	7.86447446415528e-08	9.15567062397784e-07	2.1909	up	RYBP
	1708	ENSG00000157214	0.243684	7.93076148060495e-08	9.22201038794568e-07	1.28535	up	STEAP2
	1710	ENSG00000154928	0.362989	8.04547549681393e-08	9.33896939109092e-07	1.86633	up	EPHB1
	1712	ENSG00000148835	0.242917	8.21160285775284e-08	9.52065720805893e-07	1.28045	up	TAF5
	1713	ENSG00000186812	0.355242	8.23144164724589e-08	9.53250946835847e-07	1.83321	up	ZNF397
	1714	ENSG00000128641	0.365044	8.44509519247845e-08	9.77422400969514e-07	1.8752	up	MYO1B
	1715	ENSG00000178295	0.388491	8.57025078012742e-08	9.91329007974366e-07	1.98865	up	GEN1
	1717	ENSG00000181555	0.448155	8.58245695934566e-08	9.92162050588846e-07	2.25623	up	SETD2
	1719	ENSG00000153187	0.184037	8.6196646736028e-08	9.95302689684619e-07	0.974805	up	HNRNPU
	1720	ENSG00000031691	0.273698	8.75155095374687e-08	1.00935572547403e-06	1.4318	up	CENPQ
	1726	ENSG00000103550	0.255872	8.76529744588807e-08	1.01035341373359e-06	1.34117	up	KNOP1
	1727	ENSG00000197498	0.130504	9.28415761603756e-08	1.06644095536246e-06	0.693192	up	RPF2
	1730	ENSG00000151292	0.406023	9.30062884099101e-08	1.06771434511574e-06	2.06209	up	CSNK1G3
	1731	ENSG00000135913	0.503238	9.41303013665321e-08	1.07874413577622e-06	2.48907	up	USP37
	1732	ENSG00000131019	0.305417	9.46014677964252e-08	1.08351744686997e-06	1.5846	up	ULBP3
	1738	ENSG00000065060	0.304222	9.55441899390231e-08	1.09368308875928e-06	1.57651	up	BLTP3A
	1739	ENSG00000151849	0.257198	1.00909503819317e-07	1.15111152055338e-06	1.34161	up	CENPJ
	1740	ENSG00000157259	0.243983	1.00974812562729e-07	1.15119415403603e-06	1.27549	up	GATAD1
	1741	ENSG00000185129	0.39407	1.01955539536599e-07	1.16170719934058e-06	1.99961	up	PURA
	1745	ENSG00000152952	0.31343	1.03726275705754e-07	1.18120456182785e-06	1.61656	up	PLOD2
	1746	ENSG00000172831	0.304841	1.09930565056966e-07	1.24898761193089e-06	1.57325	up	CES2
	1748	ENSG00000100644	0.23216	1.10104880921254e-07	1.25025164326734e-06	1.21139	up	HIF1A
	1749	ENSG00000138448	0.285556	1.12082221534266e-07	1.27124835477022e-06	1.47632	up	ITGAV
	1750	ENSG00000151917	0.49114	1.13042991067172e-07	1.28141243047327e-06	2.42512	up	BEND6
	1751	ENSG00000060237	0.284851	1.16576158206909e-07	1.32070795006295e-06	1.47105	up	WNK1
	1753	ENSG00000140386	0.315497	1.17640024836886e-07	1.3319995045209e-06	1.62125	up	SCAPER
	1755	ENSG00000107105	0.280872	1.18598829098523e-07	1.34123813021772e-06	1.45232	up	ELAVL2
	1756	ENSG00000196584	0.296692	1.18758250743786e-07	1.3415960565506e-06	1.5297	up	XRCC2
	1758	ENSG00000134371	0.2041	1.19054434892864e-07	1.34417609691681e-06	1.06681	up	CDC73
	1759	ENSG00000077232	0.270431	1.20443817519132e-07	1.35831577140746e-06	1.39902	up	DNAJC10
	1767	ENSG00000083720	0.204731	1.20608084557259e-07	1.3593950451576e-06	1.0692	up	OXCT1
	1769	ENSG00000171490	0.177426	1.29918247701882e-07	1.45770185565224e-06	0.927407	up	RSL1D1
	1770	ENSG00000204186	0.586525	1.3223208485158e-07	1.48198604537446e-06	2.79918	up	ZDBF2
	1773	ENSG00000115760	0.403133	1.32746024768102e-07	1.48690547291096e-06	2.02158	up	BIRC6
	1774	ENSG00000084093	0.347257	1.36814656124591e-07	1.52988571479196e-06	1.76294	up	REST
	1775	ENSG00000157181	0.403244	1.37194917476886e-07	1.53327307434991e-06	2.02494	up	ODR4
	1777	ENSG00000104447	0.369544	1.41510270606942e-07	1.58060992960746e-06	1.86326	up	TRPS1
	1778	ENSG00000135250	0.20078	1.42666068733196e-07	1.59172621198894e-06	1.04295	up	SRPK2
	1779	ENSG00000118620	0.310546	1.44214051905667e-07	1.60809212209323e-06	1.58661	up	ZNF430
	1783	ENSG00000005700	0.342582	1.45317980108117e-07	1.61949087893397e-06	1.73677	up	IBTK
	1785	ENSG00000057019	0.333769	1.50595088324536e-07	1.67453629900295e-06	1.69402	up	DCBLD2
	1787	ENSG00000135341	0.264551	1.53557648109994e-07	1.70556522769117e-06	1.35871	up	MAP3K7
	1788	ENSG00000204178	0.340247	1.54097864225545e-07	1.70964983555437e-06	1.71998	up	MACO1
	1789	ENSG00000132300	0.190504	1.55384855792728e-07	1.7229642902386e-06	0.988089	up	PTCD3
	1790	ENSG00000197299	0.477133	1.61721384926702e-07	1.79222368784616e-06	2.33507	up	BLM
	1792	ENSG00000066422	0.36763	1.62522504956479e-07	1.80009563311014e-06	1.84638	up	ZBTB11
	1793	ENSG00000069956	0.224171	1.64796480782961e-07	1.82324499330524e-06	1.15506	up	MAPK6
	1795	ENSG00000130396	0.360233	1.65349603968066e-07	1.82834425447344e-06	1.80851	up	AFDN
	1797	ENSG00000083642	0.295651	1.70730907377741e-07	1.88574427279727e-06	1.50387	up	PDS5B
	1799	ENSG00000170871	0.350399	1.73068069529858e-07	1.90943102198051e-06	1.76544	up	KIAA0232
	1800	ENSG00000174780	0.221416	1.76216277331977e-07	1.94200328759521e-06	1.13872	up	SRP72
	1802	ENSG00000068097	0.315505	1.76490332539671e-07	1.94394296273974e-06	1.5965	up	HEATR6
	1803	ENSG00000127870	0.311637	1.79020946129453e-07	1.96962779021228e-06	1.57939	up	RNF6
	1805	ENSG00000064102	0.215166	1.79915680993549e-07	1.97837398301614e-06	1.1069	up	INTS13
	1808	ENSG00000067334	0.184827	1.84681149035419e-07	2.02852546303391e-06	0.953401	up	DNTTIP2
	1810	ENSG00000174720	0.282525	1.87545992975253e-07	2.05657458889788e-06	1.43602	up	LARP7
	1811	ENSG00000156103	0.527468	1.88833396774136e-07	2.06840382565969e-06	2.52622	up	MMP16
	1813	ENSG00000113356	0.413933	1.94345426234229e-07	2.12760487052447e-06	2.04687	up	POLR3G
	1816	ENSG00000101040	0.26425	1.98113703091212e-07	2.16646567980495e-06	1.34431	up	ZMYND8
	1818	ENSG00000153561	0.147708	2.00236313698923e-07	2.18526036635035e-06	0.762768	up	RMND5A
	1819	ENSG00000153006	0.243885	2.00780031502681e-07	2.18958465598029e-06	1.24474	up	SREK1IP1
	1825	ENSG00000047346	0.572352	2.01475551505204e-07	2.19596167352511e-06	2.70183	up	ATOSA
	1827	ENSG00000155970	0.453172	2.12137863034309e-07	2.30457275206478e-06	2.20997	up	MICU3
	1829	ENSG00000145703	0.297152	2.15577811004355e-07	2.33937913572651e-06	1.49734	up	IQGAP2
	1830	ENSG00000136379	0.265298	2.1658268216308e-07	2.34698235357082e-06	1.34464	up	ABHD17C
	1831	ENSG00000154727	0.268326	2.16633597651297e-07	2.34698235357082e-06	1.36161	up	GABPA
	1832	ENSG00000120594	0.350916	2.19610745249293e-07	2.37793699361687e-06	1.74528	up	PLXDC2
	1833	ENSG00000188177	0.314034	2.20859497691969e-07	2.39015305744595e-06	1.57834	up	ZC3H6
	1837	ENSG00000254635	0.394167	2.21162788895125e-07	2.39212954317225e-06	1.94742	up	NA
	1838	ENSG00000152192	0.314999	2.31388696093694e-07	2.4972848605082e-06	1.58042	up	POU4F1
	1841	ENSG00000101489	0.277861	2.31897172104781e-07	2.50141095437943e-06	1.40244	up	CELF4
	1843	ENSG00000198589	0.313445	2.37828221214647e-07	2.56120712319478e-06	1.57063	up	LRBA
	1844	ENSG00000165650	0.301099	2.39788562585535e-07	2.57951602920283e-06	1.51177	up	PDZD8
	1845	ENSG00000188938	0.228856	2.41374747203095e-07	2.59517122453826e-06	1.1629	up	FAM120AOS
	1848	ENSG00000237268	0.709718	2.42496448023762e-07	2.60581819973936e-06	3.16491	up	NA
	1850	ENSG00000281131	0.403079	2.45596131869188e-07	2.63484248400353e-06	2.00736	up	SCHLAP1
	1851	ENSG00000278053	0.245447	2.49260670062158e-07	2.67126597008235e-06	1.2425	up	DDX52
	1852	ENSG00000163811	0.163903	2.49702056200983e-07	2.67455049499767e-06	0.83815	up	WDR43
	1854	ENSG00000234420	0.516226	2.52052626521916e-07	2.69826964007749e-06	2.46032	up	ZNF37BP
	1855	ENSG00000128059	0.28104	2.58403589801034e-07	2.76327377097912e-06	1.41225	up	PPAT
	1857	ENSG00000143195	0.415622	2.59693249372911e-07	2.77556785017107e-06	2.02645	up	ILDR2
	1858	ENSG00000083635	0.208436	2.61414471972238e-07	2.79095493878384e-06	1.05856	up	NUFIP1
	1860	ENSG00000071189	0.214209	2.62041720209775e-07	2.79614593373466e-06	1.08731	up	SNX13
	1862	ENSG00000290018	1.10992	2.6326866645298e-07	2.8062175167187e-06	4.28345	up	NA
	1863	ENSG00000168259	0.17303	2.67739183288796e-07	2.85080399993753e-06	0.881982	up	DNAJC7
	1864	ENSG00000141424	0.298304	2.68696401154061e-07	2.85946046660247e-06	1.49233	up	SLC39A6
	1865	ENSG00000126773	0.463373	2.69142707063234e-07	2.86267344969725e-06	2.23474	up	PCNX4
	1866	ENSG00000138433	0.225977	2.74986744468504e-07	2.92326391197456e-06	1.14309	up	CIR1
	1869	ENSG00000196172	0.46056	2.76275928475558e-07	2.93539472559293e-06	2.22188	up	ZNF681
	1870	ENSG00000138078	0.350918	2.81208196195569e-07	2.98300358361335e-06	1.73366	up	PREPL
	1872	ENSG00000112701	0.324959	2.87348818544869e-07	3.04651212645485e-06	1.61354	up	SENP6
	1875	ENSG00000104643	0.360908	2.89587257423387e-07	3.06532673020612e-06	1.77764	up	MTMR9
	1876	ENSG00000133706	0.224151	2.95755707079548e-07	3.12728141256486e-06	1.13085	up	LARS1
	1878	ENSG00000100888	0.249736	3.01411880784111e-07	3.18539016440607e-06	1.25389	up	CHD8
	1880	ENSG00000204842	0.260477	3.09893428282117e-07	3.27153733180046e-06	1.30381	up	ATXN2
	1882	ENSG00000100077	0.451488	3.15588315037907e-07	3.32811379464975e-06	2.16934	up	GRK3
	1883	ENSG00000138081	0.320102	3.19629983627975e-07	3.36715412083327e-06	1.58443	up	FBXO11
	1884	ENSG00000065882	0.266176	3.21207031446142e-07	3.38197058175847e-06	1.33008	up	TBC1D1
	1885	ENSG00000165156	0.35572	3.23247081925825e-07	3.40164365512814e-06	1.74792	up	ZHX1
	1886	ENSG00000157077	0.257272	3.23846244289949e-07	3.4061409227016e-06	1.28741	up	ZFYVE9
	1890	ENSG00000196458	0.592306	3.24131864940834e-07	3.40733740949999e-06	2.75361	up	ZNF605
	1892	ENSG00000182923	0.380887	3.33384627181219e-07	3.49718709973273e-06	1.86214	up	CEP63
	1895	ENSG00000171467	0.349776	3.40435524052042e-07	3.56737563417325e-06	1.71373	up	ZNF318
	1896	ENSG00000170448	0.281996	3.46771219434158e-07	3.62801382401141e-06	1.40138	up	NFXL1
	1897	ENSG00000168461	0.3396	3.50632639608225e-07	3.66647822408896e-06	1.66929	up	RAB31
	1898	ENSG00000133858	0.452897	3.55624725426732e-07	3.71671892794433e-06	2.16626	up	ZFC3H1
	1899	ENSG00000119285	0.39385	3.57384966322019e-07	3.73314770405709e-06	1.91281	up	HEATR1
	1900	ENSG00000105821	0.304499	3.58359457997807e-07	3.74135577370433e-06	1.50588	up	DNAJC2
	1901	ENSG00000155561	0.249893	3.58900000822051e-07	3.74502706120946e-06	1.24704	up	NUP205
	1903	ENSG00000050344	0.338835	3.63767585661706e-07	3.79382227949973e-06	1.66158	up	NFE2L3
	1905	ENSG00000115419	0.354325	3.65715673335913e-07	3.81013081427105e-06	1.73477	up	GLS
	1912	ENSG00000198648	0.333523	3.67670378540354e-07	3.82741272310994e-06	1.6393	up	STK39
	1913	ENSG00000198265	0.340918	3.91053593945593e-07	4.05493125186471e-06	1.66803	up	HELZ
	1914	ENSG00000189079	0.283829	3.94234606183501e-07	4.08577903930689e-06	1.40338	up	ARID2
	1917	ENSG00000078043	0.305608	4.00896872181693e-07	4.14832013980911e-06	1.50549	up	PIAS2
	1918	ENSG00000173588	0.519262	4.01114618797796e-07	4.14840815455665e-06	2.43151	up	CEP83
	1920	ENSG00000152495	0.426313	4.04947462332906e-07	4.18586464453191e-06	2.04526	up	CAMK4
	1921	ENSG00000169744	0.199401	4.12105568108636e-07	4.25541926735511e-06	0.996834	up	LDB2
	1922	ENSG00000166747	0.232102	4.12444044746868e-07	4.25669736134899e-06	1.1548	up	AP1G1
	1924	ENSG00000107581	0.264302	4.151267664471e-07	4.28215570841843e-06	1.30851	up	EIF3A
	1925	ENSG00000096717	0.245187	4.22617345202278e-07	4.35489162472992e-06	1.21636	up	SIRT1
	1926	ENSG00000230453	0.384457	4.24231486628284e-07	4.36925374228175e-06	1.85879	up	ANKRD18B
	1928	ENSG00000223572	0.459401	4.26597131597524e-07	4.39133682816849e-06	2.18297	up	CKMT1A
	1929	ENSG00000158528	0.38209	4.27381808477082e-07	4.39485048488933e-06	1.84694	up	PPP1R9A
	1930	ENSG00000114127	0.319309	4.36251742806836e-07	4.48373616012874e-06	1.56124	up	XRN1
	1931	ENSG00000119138	0.381955	4.37026379270948e-07	4.4893704639512e-06	1.84062	up	KLF9
	1932	ENSG00000109881	0.254277	4.38515289045232e-07	4.50233253268294e-06	1.25881	up	CCDC34
	1935	ENSG00000146587	0.577365	4.40776670129365e-07	4.52320821013706e-06	2.64754	up	RBAK
	1936	ENSG00000128245	0.188511	4.49913075475111e-07	4.60980704618581e-06	0.940531	up	YWHAH
	1939	ENSG00000133059	0.268398	4.5090205956766e-07	4.61755383935352e-06	1.32476	up	DSTYK
	1940	ENSG00000148700	0.340366	4.54043197110239e-07	4.6425272954655e-06	1.65652	up	ADD3
	1941	ENSG00000188227	0.550845	4.54554771751857e-07	4.64536232203727e-06	2.54747	up	ZNF793
	1942	ENSG00000157654	0.345093	4.55229108191686e-07	4.64985692890694e-06	1.67639	up	PALM2AKAP2
	1943	ENSG00000100354	0.211669	4.57270076047145e-07	4.66829893290973e-06	1.05243	up	TNRC6B
	1945	ENSG00000102893	0.226502	4.59227835404098e-07	4.6858729103045e-06	1.1235	up	PHKB
	1948	ENSG00000125676	0.347116	4.6203893167542e-07	4.70892573943022e-06	1.68526	up	THOC2
	1949	ENSG00000255642	0.542198	4.65712901463145e-07	4.73984804127736e-06	2.5412	up	NA
	1950	ENSG00000196284	0.308752	4.67676648070477e-07	4.75739211115714e-06	1.51153	up	SUPT3H
	1951	ENSG00000130816	0.205098	4.71145374838154e-07	4.79021959053397e-06	1.01944	up	DNMT1
	1953	ENSG00000120137	0.384021	4.73477316872828e-07	4.81146144762721e-06	1.84873	up	PANK3
	1955	ENSG00000149548	0.482663	4.74659750051019e-07	4.81836244924593e-06	2.264	up	CCDC15
	1956	ENSG00000267383	0.626265	4.79108132279172e-07	4.85872011793702e-06	2.82074	up	NA
	1959	ENSG00000197323	0.292342	4.79953146028181e-07	4.86480116214454e-06	1.4324	up	TRIM33
	1962	ENSG00000180229	0.445724	4.85840967352974e-07	4.91443011160207e-06	2.11658	up	HERC2P3
	1963	ENSG00000141867	0.247486	4.87948003318133e-07	4.93071208653685e-06	1.22108	up	BRD4
	1964	ENSG00000116649	0.224363	4.91654055765548e-07	4.96563082506763e-06	1.1106	up	SRM
	1965	ENSG00000180071	0.449448	4.93419577110106e-07	4.98092491638745e-06	2.12327	up	ANKRD18A
	1966	ENSG00000064393	0.285303	4.95535620956616e-07	4.99918341006552e-06	1.39879	up	HIPK2
	1968	ENSG00000171827	0.56306	4.95732602854273e-07	4.99918341006552e-06	2.58067	up	ZNF570
	1971	ENSG00000108256	0.416424	5.02604186367373e-07	5.06332855636155e-06	1.98294	up	NUFIP2
	1973	ENSG00000232931	0.899503	5.13594678092749e-07	5.16617356056156e-06	3.68272	up	NA
	1974	ENSG00000146433	0.294592	5.21915389785664e-07	5.24454866593542e-06	1.43868	up	TMEM181
	1975	ENSG00000133789	0.259549	5.25622395652316e-07	5.27912341246344e-06	1.27485	up	SWAP70
	1976	ENSG00000083093	0.274332	5.2878099408278e-07	5.30547165419292e-06	1.34419	up	PALB2
	1979	ENSG00000166037	0.354093	5.28520781264215e-07	5.30547165419292e-06	1.7091	up	CEP57
	1980	ENSG00000104824	0.226704	5.41836796474902e-07	5.42822452092542e-06	1.1175	up	HNRNPL
	1981	ENSG00000116747	0.278277	5.43213165784063e-07	5.43926476001759e-06	1.36136	up	RO60
	1982	ENSG00000168779	0.454247	5.45395682415892e-07	5.45836183724254e-06	2.14139	up	SHOX2
	1985	ENSG00000157212	0.388238	5.49054377713855e-07	5.48943625444019e-06	1.85405	up	PAXIP1
	1986	ENSG00000080608	0.210622	5.53855878891375e-07	5.53186229466015e-06	1.03989	up	PUM3
	1988	ENSG00000143799	0.250717	5.54512331927302e-07	5.53563015749783e-06	1.23054	up	PARP1
	1989	ENSG00000155906	0.194426	5.58857442932961e-07	5.5733941969763e-06	0.961769	up	RMND1
	1990	ENSG00000104332	0.347052	5.64030539566507e-07	5.62215660002291e-06	1.67243	up	SFRP1
	1991	ENSG00000164830	0.217397	5.69003437479551e-07	5.66887545299979e-06	1.07127	up	OXR1
	1994	ENSG00000198728	0.359366	5.71803623687674e-07	5.69391192527967e-06	1.72538	up	LDB1
	2002	ENSG00000062194	0.270545	5.80695348325128e-07	5.77375425069909e-06	1.32145	up	GPBP1
	2003	ENSG00000012983	0.307806	6.06090880718227e-07	6.00217672383595e-06	1.49068	up	MAP4K5
	2007	ENSG00000092853	0.242265	6.10139064631186e-07	6.03924967317918e-06	1.18631	up	CLSPN
	2016	ENSG00000064652	0.359341	6.28813605498067e-07	6.2085948917354e-06	1.72077	up	SNX24
	2017	ENSG00000135597	0.215501	6.61286738124758e-07	6.50330896332414e-06	1.05539	up	REPS1
	2018	ENSG00000086712	0.288275	6.63613097246313e-07	6.5229515448713e-06	1.39648	up	TXLNG
	2020	ENSG00000156531	0.199419	6.66186195948855e-07	6.54499877149752e-06	0.979206	up	PHF6
	2023	ENSG00000124789	0.404559	6.75033190959522e-07	6.62535051681361e-06	1.90883	up	NUP153
	2024	ENSG00000198380	0.348609	6.78325007831565e-07	6.64778626063698e-06	1.66537	up	GFPT1
	2025	ENSG00000260196	0.577109	6.8606095473225e-07	6.7202788974909e-06	2.59162	up	NA
	2026	ENSG00000196396	0.238895	6.98845081293262e-07	6.84212473171368e-06	1.16424	up	PTPN1
	2028	ENSG00000155621	0.252969	7.00285761899353e-07	6.85220127694612e-06	1.23082	up	C9orf85
	2030	ENSG00000058091	0.441734	7.03331882894148e-07	6.87586681965453e-06	2.0672	up	CDK14
	2032	ENSG00000122376	0.296841	7.24775363814665e-07	7.07852037585692e-06	1.43154	up	SHLD2
	2034	ENSG00000110048	0.263428	7.39139234078994e-07	7.21170002699318e-06	1.27571	up	OSBP
	2036	ENSG00000141905	0.383026	7.56192156080916e-07	7.37082875440523e-06	1.81003	up	NFIC
	2037	ENSG00000145824	0.448863	7.68514499271904e-07	7.48357979497287e-06	2.09008	up	CXCL14
	2041	ENSG00000138376	0.287766	7.68972964776817e-07	7.48422260702926e-06	1.38581	up	BARD1
	2042	ENSG00000130779	0.388738	7.78095373718989e-07	7.55831400262258e-06	1.8294	up	CLIP1
	2043	ENSG00000121060	0.21488	7.80593346618002e-07	7.57886566603746e-06	1.04573	up	TRIM25
	2044	ENSG00000139629	0.302513	7.8170143415575e-07	7.58590926753397e-06	1.45219	up	GALNT6
	2045	ENSG00000176953	0.255824	7.89499715717629e-07	7.65783824061532e-06	1.23765	up	NFATC2IP
	2047	ENSG00000007168	0.190107	7.93651297550161e-07	7.69434260402421e-06	0.927921	up	PAFAH1B1
	2049	ENSG00000127980	0.431673	8.08203811619925e-07	7.8277717484986e-06	2.01043	up	PEX1
	2050	ENSG00000036549	0.213406	8.31922664988303e-07	8.04963336069209e-06	1.03745	up	ZZZ3
	2052	ENSG00000064042	0.316825	8.53039272719529e-07	8.24993005899384e-06	1.51258	up	LIMCH1
	2053	ENSG00000140396	0.31019	8.75798184627142e-07	8.46178109572013e-06	1.47976	up	NCOA2
	2054	ENSG00000173674	0.208696	8.86875606137283e-07	8.56463505468961e-06	1.0119	up	EIF1AX
	2056	ENSG00000106624	0.315193	8.94173421478678e-07	8.63090664763207e-06	1.49912	up	AEBP1
	2058	ENSG00000125844	0.209906	9.09166297716603e-07	8.76549431299386e-06	1.01597	up	RRBP1
	2060	ENSG00000182903	0.37786	9.11717570495777e-07	8.78314506931451e-06	1.77624	up	ZNF721
	2063	ENSG00000137821	0.356775	9.25797649187933e-07	8.91012824893202e-06	1.68304	up	LRRC49
	2066	ENSG00000114251	0.57071	9.34956595865562e-07	8.98519121164839e-06	2.53253	up	WNT5A
	2067	ENSG00000135655	0.3848	9.55074035380612e-07	9.16519739857503e-06	1.80115	up	USP15
	2069	ENSG00000257511	0.424303	9.57363944264214e-07	9.18272741121543e-06	1.97338	up	LOC100420981
	2070	ENSG00000213079	0.319805	9.66038410762918e-07	9.25697319080987e-06	1.51788	up	SCAF8
	2071	ENSG00000169379	0.241196	9.77334826559882e-07	9.36069578327354e-06	1.16035	up	ARL13B
	2072	ENSG00000101868	0.364979	9.78592121085649e-07	9.36821216448289e-06	1.71437	up	POLA1
	2074	ENSG00000197081	0.245321	9.94456746151803e-07	9.51549201216489e-06	1.17737	up	IGF2R
	2075	ENSG00000133640	0.420557	1.00814314240794e-06	9.6341460581169e-06	1.95304	up	LRRIQ1
	2081	ENSG00000172954	0.335268	1.00831499397723e-06	9.6341460581169e-06	1.58256	up	LCLAT1
	2082	ENSG00000147419	0.131256	1.05671531667405e-06	1.00674857608745e-05	0.637167	up	CCDC25
	2083	ENSG00000112249	0.430453	1.0616870661101e-06	1.01099941271368e-05	1.98571	up	ASCC3
	2084	ENSG00000104164	0.322524	1.07279971722481e-06	1.02109107987033e-05	1.52379	up	BLOC1S6
	2087	ENSG00000107560	0.37363	1.07910726111985e-06	1.02660175426882e-05	1.73517	up	RAB11FIP2
	2088	ENSG00000122203	0.373165	1.10343606084247e-06	1.04823782186214e-05	1.74298	up	KIAA1191
	2092	ENSG00000143458	0.445115	1.10642847676053e-06	1.05057715422673e-05	2.04224	up	GABPB2
	2094	ENSG00000148468	0.260205	1.14131320269417e-06	1.0816288506986e-05	1.23844	up	FAM171A1
	2098	ENSG00000184260	0.403534	1.15929585487105e-06	1.09762175829386e-05	1.86837	up	H2AC20
	2099	ENSG00000179295	0.305364	1.20233873228644e-06	1.13620437113017e-05	1.44034	up	PTPN11
	2102	ENSG00000166415	0.266904	1.20554874172368e-06	1.13869506209689e-05	1.26742	up	WDR72
	2104	ENSG00000172915	0.531766	1.23817021621151e-06	1.16783837804992e-05	2.36563	up	NBEA
	2107	ENSG00000115825	0.448778	1.2689859895823e-06	1.19576598048758e-05	2.04535	up	PRKD3
	2110	ENSG00000186897	0.222797	1.3433511291631e-06	1.26403794431835e-05	1.05897	up	C1QL4
	2112	ENSG00000184445	0.240145	1.39108153197634e-06	1.30708921578023e-05	1.13784	up	KNTC1
	2113	ENSG00000153147	0.27195	1.42254343177171e-06	1.33538570446524e-05	1.28122	up	SMARCA5
	2114	ENSG00000180336	0.479675	1.42350821869497e-06	1.335658965634e-05	2.15159	up	MEIOC
	2119	ENSG00000106034	0.634288	1.42690547072486e-06	1.33821323853316e-05	2.76383	up	CPED1
	2123	ENSG00000168769	0.536154	1.48874317746019e-06	1.39291280020414e-05	2.36898	up	TET2
	2126	ENSG00000169018	0.327661	1.55286599490205e-06	1.45017057065134e-05	1.52254	up	FEM1B
	2127	ENSG00000113360	0.381031	1.5853506572111e-06	1.47841778597683e-05	1.74826	up	DROSHA
	2130	ENSG00000197256	0.338811	1.59706780890249e-06	1.48864439959101e-05	1.56909	up	KANK2
	2132	ENSG00000169118	0.407631	1.64070623090765e-06	1.52716627859038e-05	1.85508	up	CSNK1G1
	2135	ENSG00000072310	0.272298	1.6728992077109e-06	1.55567071726436e-05	1.27368	up	SREBF1
	2136	ENSG00000186918	0.445198	1.68465965211068e-06	1.56440572659234e-05	2.00045	up	ZNF395
	2137	ENSG00000138709	0.264173	1.68929344545612e-06	1.5679743375287e-05	1.23704	up	LARP1B
	2138	ENSG00000146281	0.256783	1.69852514904727e-06	1.57580531609785e-05	1.20377	up	PM20D2
	2139	ENSG00000100485	0.474195	1.70223284119119e-06	1.57850646910461e-05	2.12091	up	SOS2
	2142	ENSG00000171681	0.291747	1.71140428158881e-06	1.58626934487049e-05	1.3592	up	ATF7IP
	2146	ENSG00000115808	0.332786	1.72669976144328e-06	1.59820492392038e-05	1.53781	up	STRN
	2150	ENSG00000185070	0.402076	1.73846465613824e-06	1.60609507328037e-05	1.82279	up	FLRT2
	2151	ENSG00000118985	0.584528	1.82650448119884e-06	1.68429199275573e-05	2.53234	up	ELL2
	2152	ENSG00000043093	0.357063	1.85129712828897e-06	1.70636061671117e-05	1.63821	up	DCUN1D1
	2153	ENSG00000144228	0.479021	1.87775912616162e-06	1.72994667450187e-05	2.13328	up	SPOPL
	2154	ENSG00000128487	0.365896	1.87974647248932e-06	1.73084125777744e-05	1.67557	up	SPECC1
	2155	ENSG00000197771	0.22937	1.88047617736941e-06	1.73084125777744e-05	1.07457	up	MCMBP
	2156	ENSG00000160360	0.372209	1.88279267221968e-06	1.73216925844211e-05	1.6962	up	GPSM1
	2157	ENSG00000156017	0.389532	1.8869266502551e-06	1.73448895984205e-05	1.77159	up	CARNMT1
	2158	ENSG00000168710	0.199329	1.88706379823429e-06	1.73448895984205e-05	0.937734	up	AHCYL1
	2160	ENSG00000082212	0.249786	1.89388577482802e-06	1.73995270489992e-05	1.16729	up	ME2
	2161	ENSG00000137145	0.311452	1.91512162549936e-06	1.7578333957014e-05	1.43852	up	DENND4C
	2163	ENSG00000147010	0.376688	1.92722543889271e-06	1.76812455120254e-05	1.71533	up	SH3KBP1
	2164	ENSG00000104290	0.316164	1.94987155226455e-06	1.78642113656178e-05	1.45897	up	FZD3
	2166	ENSG00000162409	0.394618	1.94953469779642e-06	1.78642113656178e-05	1.78915	up	PRKAA2
	2167	ENSG00000132424	0.248446	1.97587385837992e-06	1.80857225836751e-05	1.15881	up	PNISR
	2169	ENSG00000100393	0.382405	1.9789902116446e-06	1.81058882953696e-05	1.73659	up	EP300
	2170	ENSG00000101361	0.241064	2.05184650607546e-06	1.87551446885441e-05	1.12392	up	NOP56
	2171	ENSG00000066084	0.276691	2.0927518563464e-06	1.91202296331445e-05	1.28128	up	DIP2B
	2172	ENSG00000170759	0.223809	2.09573386987906e-06	1.91386548614566e-05	1.04513	up	KIF5B
	2174	ENSG00000116984	0.410491	2.11667786748902e-06	1.93121285783881e-05	1.84855	up	MTR
	2175	ENSG00000110756	0.312206	2.15256480854398e-06	1.96305197305395e-05	1.4333	up	HPS5
	2179	ENSG00000230091	0.502969	2.16216295369278e-06	1.97089851585807e-05	2.26435	up	NA
	2180	ENSG00000166949	0.239231	2.197779370553e-06	1.9996867278836e-05	1.11142	up	SMAD3
	2181	ENSG00000126804	0.341398	2.20352749483271e-06	2.00399706938318e-05	1.55757	up	ZBTB1
	2182	ENSG00000113645	0.215436	2.2072832621624e-06	2.00649234092764e-05	1.00402	up	WWC1
	2183	ENSG00000076650	0.348854	2.21264586552233e-06	2.01044532217441e-05	1.59078	up	GPATCH1
	2185	ENSG00000064012	0.73111	2.23402146042456e-06	2.02893767633428e-05	2.95066	up	CASP8
	2187	ENSG00000065548	0.168099	2.29756739180824e-06	2.08474009656706e-05	0.787265	up	ZC3H15
	2188	ENSG00000174498	0.217597	2.31074488611985e-06	2.09477952044866e-05	1.01311	up	IGDCC3
	2191	ENSG00000196712	0.322702	2.31603305504025e-06	2.09861386422432e-05	1.47493	up	NF1
	2192	ENSG00000122218	0.153629	2.43026280118869e-06	2.19910498842387e-05	0.718757	up	COPA
	2193	ENSG00000150712	0.280507	2.43821273288805e-06	2.20529222820431e-05	1.28965	up	MTMR12
	2194	ENSG00000105926	0.343807	2.45570072734911e-06	2.22009679071699e-05	1.5621	up	PALS2
	2196	ENSG00000052795	0.315434	2.46609287541696e-06	2.22746047143584e-05	1.44037	up	FNIP2
	2197	ENSG00000107625	0.25701	2.49168967997584e-06	2.24955553712208e-05	1.18558	up	DDX50
	2198	ENSG00000162607	0.1953	2.51948119765122e-06	2.27361102524502e-05	0.90816	up	USP1
	2202	ENSG00000109920	0.311061	2.52106933855878e-06	2.2740091313133e-05	1.42044	up	FNBP4
	2203	ENSG00000113282	0.232555	2.60928435551834e-06	2.34930388885134e-05	1.07445	up	CLINT1
	2204	ENSG00000166200	0.282061	2.62845284681098e-06	2.36548824969925e-05	1.29285	up	COPS2
	2207	ENSG00000134313	0.336686	2.63890380005588e-06	2.37381609527713e-05	1.52636	up	KIDINS220
	2208	ENSG00000100105	0.262566	2.67895743989901e-06	2.40657046685264e-05	1.20482	up	PATZ1
	2209	ENSG00000111860	0.591556	2.69078565692168e-06	2.41610128777759e-05	2.5074	up	CEP85L
	2212	ENSG00000129810	0.29381	2.70398174328959e-06	2.42575303359545e-05	1.34152	up	SGO1
	2213	ENSG00000197121	0.403156	2.75287296442267e-06	2.46738062353724e-05	1.79538	up	PGAP1
	2215	ENSG00000177200	0.286172	2.75575801537099e-06	2.4688503575574e-05	1.30752	up	CHD9
	2218	ENSG00000278845	0.182142	2.81431040566917e-06	2.51903016265449e-05	0.844371	up	MRPL45
	2219	ENSG00000130340	0.266088	2.89747522743852e-06	2.58996140032444e-05	1.21699	up	SNX9
	2220	ENSG00000100629	0.365262	2.91413463949652e-06	2.60251436521072e-05	1.63565	up	CEP128
	2221	ENSG00000152270	0.448503	2.91414399816796e-06	2.60251436521072e-05	1.97554	up	PDE3B
	2222	ENSG00000178567	0.275355	2.94849536996128e-06	2.63200671791321e-05	1.25776	up	EPM2AIP1
	2223	ENSG00000147251	0.51461	3.00380536318808e-06	2.68017304818033e-05	2.19823	up	DOCK11
	2225	ENSG00000154153	0.367333	3.01312963506122e-06	2.68728331735149e-05	1.64442	up	RETREG1
	2227	ENSG00000164070	0.359641	3.04026242411326e-06	2.7090446211447e-05	1.61322	up	HSPA4L
	2228	ENSG00000128829	0.30282	3.07494947347759e-06	2.7374920638153e-05	1.37279	up	EIF2AK4
	2229	ENSG00000078304	0.180784	3.08501288022619e-06	2.7452183735801e-05	0.834803	up	PPP2R5C
	2230	ENSG00000280088	0.643755	3.08686013896089e-06	2.74562983916728e-05	2.64826	up	NA
	2233	ENSG00000164221	0.34171	3.13141716427902e-06	2.78401240802672e-05	1.53524	up	CCDC112
	2236	ENSG00000156735	0.346572	3.16933079148386e-06	2.81393427102369e-05	1.5567	up	BAG4
	2237	ENSG00000088930	0.245605	3.22505897955759e-06	2.85957152632865e-05	1.12204	up	XRN2
	2239	ENSG00000198399	0.336199	3.24088976028889e-06	2.87232366506426e-05	1.51027	up	ITSN2
	2240	ENSG00000101343	0.352685	3.28061154995215e-06	2.90493097763963e-05	1.57736	up	CRNKL1
	2243	ENSG00000178913	0.153537	3.28741950634494e-06	2.90965978271405e-05	0.709002	up	TAF7
	2244	ENSG00000141858	0.219961	3.35919097033256e-06	2.96920731956368e-05	1.00606	up	SAMD1
	2245	ENSG00000055130	0.196251	3.37735712044891e-06	2.98393414750535e-05	0.900774	up	CUL1
	2247	ENSG00000138593	0.387656	3.37900706908926e-06	2.98406210030128e-05	1.72075	up	SECISBP2L
	2248	ENSG00000152601	0.361168	3.41262088876824e-06	3.01106460795367e-05	1.61262	up	MBNL1
	2249	ENSG00000115414	0.323164	3.41702249827429e-06	3.01360711969689e-05	1.452	up	FN1
	2252	ENSG00000134138	0.282894	3.43727753493003e-06	3.03012291718643e-05	1.28089	up	MEIS2
	2253	ENSG00000135801	0.34807	3.4809138109206e-06	3.0645025406444e-05	1.55609	up	TAF5L
	2254	ENSG00000136492	0.355278	3.50586361555249e-06	3.08509773821322e-05	1.58508	up	BRIP1
	2259	ENSG00000241316	0.656812	3.51595056026966e-06	3.09260141117597e-05	2.769	up	SUCLG2-DT
	2265	ENSG00000116127	0.46614	3.56963225475811e-06	3.13286981331714e-05	2.02281	up	ALMS1
	2266	ENSG00000132670	0.182549	3.64077649856616e-06	3.1868448062063e-05	0.836462	up	PTPRA
	2268	ENSG00000112394	0.334868	3.66114100520106e-06	3.20325602688068e-05	1.49675	up	SLC16A10
	2269	ENSG00000069248	0.23968	3.71592052365962e-06	3.24831747363649e-05	1.08922	up	NUP133
	2271	ENSG00000173542	0.322682	3.72970687732839e-06	3.2589320647824e-05	1.44531	up	MOB1B
	2275	ENSG00000165660	0.36052	3.86735780816604e-06	3.37623231636724e-05	1.58975	up	ABRAXAS2
	2276	ENSG00000130939	0.240264	3.95234540897676e-06	3.44436044300541e-05	1.08942	up	UBE4B
	2277	ENSG00000198920	0.471475	3.96476535463032e-06	3.45366598949476e-05	2.0449	up	KIAA0753
	2278	ENSG00000118513	0.528584	3.97008028543287e-06	3.45677697580114e-05	2.23675	up	MYB
	2279	ENSG00000104321	0.408143	3.97432970840018e-06	3.45895789283327e-05	1.78856	up	TRPA1
	2283	ENSG00000182827	0.255087	3.98815548536736e-06	3.46946777766096e-05	1.15171	up	ACBD3
	2284	ENSG00000185658	0.282499	4.09949314857686e-06	3.5600767044978e-05	1.26915	up	BRWD1
	2285	ENSG00000143190	0.324542	4.11613839307508e-06	3.57296671546e-05	1.44761	up	POU2F1
	2287	ENSG00000136193	0.184544	4.17535138057516e-06	3.62277971427935e-05	0.840081	up	SCRN1
	2288	ENSG00000177469	0.238778	4.23424345589999e-06	3.66906078481963e-05	1.07825	up	CAVIN1
	2291	ENSG00000261824	0.31812	4.23302574198745e-06	3.66906078481963e-05	1.41881	up	LINC00662
	2293	ENSG00000006125	0.213015	4.28561756443557e-06	3.7087147024225e-05	0.965254	up	AP2B1
	2294	ENSG00000090470	0.24024	4.30688606018448e-06	3.72386929913727e-05	1.08413	up	PDCD7
	2295	ENSG00000160007	0.268667	4.31375434568086e-06	3.72737859074757e-05	1.20637	up	ARHGAP35
	2297	ENSG00000197008	0.408767	4.31470486521016e-06	3.72737859074757e-05	1.78733	up	ZNF138
	2300	ENSG00000068878	0.290474	4.35271960351418e-06	3.7569446608303e-05	1.2992	up	PSME4
	2301	ENSG00000136111	0.367785	4.37601525331077e-06	3.77212514835389e-05	1.61942	up	TBC1D4
	2302	ENSG00000186814	0.435928	4.38826086423961e-06	3.78103693587199e-05	1.89029	up	ZSCAN30
	2303	ENSG00000109805	0.249984	4.4413685998595e-06	3.82513353000931e-05	1.12516	up	NCAPG
	2304	ENSG00000112742	0.36243	4.46707484962993e-06	3.84560251709783e-05	1.59621	up	TTK
	2305	ENSG00000136100	0.290393	4.51505088590896e-06	3.88521696458468e-05	1.29754	up	VPS36
	2308	ENSG00000147526	0.330747	4.52839202317899e-06	3.89500651850528e-05	1.46554	up	TACC1
	2309	ENSG00000102158	0.321252	4.56036487930358e-06	3.9174087563723e-05	1.4258	up	MAGT1
	2313	ENSG00000106346	0.335316	4.5701642950327e-06	3.92412634531478e-05	1.48353	up	USP42
	2314	ENSG00000130177	0.293468	4.80619575635043e-06	4.11965573131879e-05	1.30619	up	CDC16
	2315	ENSG00000107771	0.441816	4.82701294353266e-06	4.13571126268273e-05	1.90543	up	CCSER2
	2320	ENSG00000058729	0.229414	4.85657220057907e-06	4.15923976020218e-05	1.03151	up	RIOK2
	2321	ENSG00000100030	0.308506	5.03275043771078e-06	4.30083233526094e-05	1.3654	up	MAPK1
	2323	ENSG00000107338	0.367157	5.04684001147541e-06	4.31101465176697e-05	1.59814	up	SHB
	2327	ENSG00000145332	0.410635	5.106373860632e-06	4.35811313649979e-05	1.77886	up	KLHL8
	2329	ENSG00000168491	0.604186	5.19199925689708e-06	4.42357444208172e-05	2.48292	up	CCDC110
	2330	ENSG00000096654	0.418522	5.24955898916028e-06	4.46877443190604e-05	1.80366	up	ZNF184
	2332	ENSG00000126787	0.332993	5.28872128878204e-06	4.50017975413703e-05	1.4643	up	DLGAP5
	2334	ENSG00000091436	0.393005	5.37325475372057e-06	4.56818819670943e-05	1.705	up	MAP3K20
	2336	ENSG00000165699	0.322871	5.38207870145572e-06	4.57176916602661e-05	1.42108	up	TSC1
	2341	ENSG00000055917	0.342443	5.41590686913187e-06	4.59614765341696e-05	1.5016	up	PUM2
	2344	ENSG00000145555	0.252114	5.49699253456339e-06	4.65541964930602e-05	1.12296	up	MYO10
	2349	ENSG00000111731	0.385397	5.66052833797363e-06	4.78778305583043e-05	1.67032	up	C2CD5
	2350	ENSG00000140598	0.276083	5.80888016077835e-06	4.90280366400986e-05	1.22123	up	EFL1
	2351	ENSG00000186416	0.328391	5.8377176205039e-06	4.92504636357917e-05	1.44013	up	NKRF
	2353	ENSG00000010292	0.173504	5.86266138658367e-06	4.94358278348779e-05	0.778779	up	NCAPD2
	2355	ENSG00000197102	0.324346	5.86716951959385e-06	4.94358278348779e-05	1.42053	up	DYNC1H1
	2357	ENSG00000113441	0.417082	5.93981188497089e-06	5.00053972107995e-05	1.78971	up	LNPEP
	2363	ENSG00000139324	0.474644	6.0599122438873e-06	5.09515776706147e-05	2.00419	up	TMTC3
	2367	ENSG00000110011	0.235217	6.17573201262338e-06	5.18155153966446e-05	1.04543	up	DNAJC4
	2368	ENSG00000125864	0.511003	6.36656306726493e-06	5.3326353769157e-05	2.13947	up	BFSP1
	2372	ENSG00000247556	0.281588	6.4283030705202e-06	5.38207502855294e-05	1.2395	up	OIP5-AS1
	2373	ENSG00000153113	0.435658	6.6707126874211e-06	5.57561339548106e-05	1.85297	up	CAST
	2374	ENSG00000063046	0.210783	6.67641896905292e-06	5.57803128868282e-05	0.93623	up	EIF4B
	2375	ENSG00000124784	0.188269	6.70281567851463e-06	5.59772635392717e-05	0.838235	up	RIOK1
	2376	ENSG00000185942	0.626958	6.7275159301043e-06	5.61598866653675e-05	2.52947	up	NKAIN3
	2384	ENSG00000090905	0.297741	6.79299860634423e-06	5.6682655879369e-05	1.30298	up	TNRC6A
	2385	ENSG00000131773	0.371533	7.05778038925446e-06	5.86944437908385e-05	1.59669	up	KHDRBS3
	2387	ENSG00000156011	0.358201	7.06620181432942e-06	5.8739839484652e-05	1.54583	up	PSD3
	2389	ENSG00000126870	0.309343	7.17756690902421e-06	5.96156018174755e-05	1.34674	up	DYNC2I1
	2394	ENSG00000103042	0.394056	7.25843667090213e-06	6.02368210285917e-05	1.68814	up	SLC38A7
	2398	ENSG00000145375	0.481878	7.39095225685514e-06	6.12084458832122e-05	2.01536	up	SPATA5
	2399	ENSG00000275110	1.42586	7.56073225439388e-06	6.25100407321156e-05	3.5739	up	NA
	2400	ENSG00000046604	0.276215	7.59861405758314e-06	6.27970497314061e-05	1.20712	up	DSG2
	2403	ENSG00000008294	0.315551	7.64699977012856e-06	6.31659623977474e-05	1.36955	up	SPAG9
	2404	ENSG00000166483	0.335174	7.675035755122e-06	6.33230374036824e-05	1.44772	up	WEE1
	2405	ENSG00000147862	0.436401	7.70547978758695e-06	6.35477713264138e-05	1.84252	up	NFIB
	2406	ENSG00000079246	0.166607	7.72740383841905e-06	6.37020825365888e-05	0.738667	up	XRCC5
	2408	ENSG00000114861	0.304591	7.75964275243432e-06	6.39412623481974e-05	1.32295	up	FOXP1
	2409	ENSG00000243199	0.306304	7.79010880070775e-06	6.41389938051627e-05	1.33251	up	RPL6P10
	2410	ENSG00000170264	0.404573	7.83371514988527e-06	6.44712480538088e-05	1.72126	up	FAM161A
	2411	ENSG00000042317	0.470171	7.8408943526268e-06	6.45035566121074e-05	1.96724	up	SPATA7
	2412	ENSG00000163848	0.316325	7.86595596264415e-06	6.46828879781763e-05	1.36981	up	ZNF148
	2413	ENSG00000079785	0.15163	8.00468078052067e-06	6.57963520541471e-05	0.672121	up	DDX1
	2414	ENSG00000050405	0.348301	8.01032050187735e-06	6.58154224078824e-05	1.49777	up	LIMA1
	2416	ENSG00000181904	0.340714	8.02587328647092e-06	6.59158922028055e-05	1.46775	up	C5orf24
	2417	ENSG00000070214	0.24097	8.07132064833737e-06	6.62342728368943e-05	1.05566	up	SLC44A1
	2419	ENSG00000081026	0.717252	8.12600655784578e-06	6.66003332020878e-05	2.76855	up	MAGI3
	2421	ENSG00000230629	0.327685	8.1251165749509e-06	6.66003332020878e-05	1.41489	up	RPS23P8
	2422	ENSG00000128596	0.508039	8.2070728415588e-06	6.72091805686678e-05	2.07998	up	CCDC136
	2423	ENSG00000109787	0.357444	8.22169618727017e-06	6.73011348508747e-05	1.53061	up	KLF3
	2427	ENSG00000167258	0.332463	8.23501270215045e-06	6.73823201951444e-05	1.43184	up	CDK12
	2428	ENSG00000147133	0.349913	8.41806490851941e-06	6.87666068711602e-05	1.49807	up	TAF1
	2429	ENSG00000138032	0.255713	8.43239847116204e-06	6.88553262311609e-05	1.11545	up	PPM1B
	2430	ENSG00000126858	0.349026	8.50873476162192e-06	6.94500516195621e-05	1.4952	up	RHOT1
	2432	ENSG00000184486	0.370052	8.55707302502611e-06	6.98158558823736e-05	1.57827	up	POU3F2
	2433	ENSG00000163681	0.355646	8.63624512809671e-06	7.04038634496897e-05	1.52088	up	SLMAP
	2435	ENSG00000051341	0.450538	8.69601955966272e-06	7.08620155322125e-05	1.88754	up	POLQ
	2438	ENSG00000159459	0.389807	8.73758186251485e-06	7.11422168403365e-05	1.6526	up	UBR1
	2441	ENSG00000183354	0.640282	8.92567579677161e-06	7.2584269215256e-05	2.52168	up	KIAA2026
	2442	ENSG00000122691	0.555879	9.05271554931492e-06	7.35007530035364e-05	2.24047	up	TWIST1
	2444	ENSG00000138443	0.24334	9.05320482369796e-06	7.35007530035364e-05	1.06041	up	ABI2
	2445	ENSG00000145715	0.387559	9.10277394967809e-06	7.38427153544672e-05	1.6411	up	RASA1
	2447	ENSG00000153721	0.378974	9.10894948467219e-06	7.38625899726425e-05	1.6046	up	CNKSR3
	2451	ENSG00000145833	0.171321	9.17529960898595e-06	7.43397997743177e-05	0.752899	up	DDX46
	2452	ENSG00000165669	0.222625	9.3878297027256e-06	7.59376220670084e-05	0.970632	up	FAM204A
	2453	ENSG00000105976	0.337109	9.42999449358537e-06	7.62475819044957e-05	1.43997	up	MET
	2454	ENSG00000088325	0.205175	9.45270756454855e-06	7.64000734507703e-05	0.896678	up	TPX2
	2457	ENSG00000108055	0.224063	9.494206658886e-06	7.67042140257024e-05	0.976729	up	SMC3
	2458	ENSG00000103995	0.429275	9.81367141484026e-06	7.91743223375538e-05	1.79128	up	CEP152
	2460	ENSG00000181450	0.543034	9.81592274315078e-06	7.91743223375538e-05	2.20579	up	ZNF678
	2462	ENSG00000158941	0.256759	9.83489745700045e-06	7.92628768221508e-05	1.112	up	CCAR2
	2463	ENSG00000101350	0.442115	9.87318328122341e-06	7.95067959925002e-05	1.8424	up	KIF3B
	2467	ENSG00000148154	0.362618	1.00045683407689e-05	8.05321039074645e-05	1.53779	up	UGCG
	2470	ENSG00000071537	0.359693	1.0169589931643e-05	8.17277219232887e-05	1.52437	up	SEL1L
	2471	ENSG00000148180	0.17941	1.02717236456071e-05	8.24482562744158e-05	0.782553	up	GSN
	2472	ENSG00000112406	0.424017	1.03308896947522e-05	8.28560756829116e-05	1.76722	up	HECA
	2474	ENSG00000120071	0.353085	1.03291944496963e-05	8.28560756829116e-05	1.495	up	KANSL1
	2475	ENSG00000151779	0.371918	1.04125133289569e-05	8.34432050363381e-05	1.56793	up	NBAS
	2477	ENSG00000011347	0.545843	1.04311329389166e-05	8.35586430896807e-05	2.20149	up	SYT7
	2479	ENSG00000169604	0.316604	1.05214502029291e-05	8.42140782088305e-05	1.35263	up	ANTXR1
	2480	ENSG00000185104	0.257159	1.0713812936871e-05	8.56845725237613e-05	1.10837	up	FAF1
	2481	ENSG00000099204	0.324597	1.07577261628889e-05	8.60010802038044e-05	1.38145	up	ABLIM1
	2482	ENSG00000160584	0.487857	1.08225120661425e-05	8.64841290702708e-05	2.00073	up	SIK3
	2483	ENSG00000153922	0.434722	1.08389260910395e-05	8.65775288989894e-05	1.80434	up	CHD1
	2484	ENSG00000155189	0.268603	1.08429337363155e-05	8.65775288989894e-05	1.15545	up	AGPAT5
	2485	ENSG00000090612	0.531165	1.09803693454808e-05	8.76396145907818e-05	2.14887	up	ZNF268
	2486	ENSG00000072364	0.42646	1.10159519043213e-05	8.78882343883597e-05	1.77374	up	AFF4
	2489	ENSG00000085449	0.341847	1.10691145408242e-05	8.82768563501128e-05	1.44808	up	WDFY1
	2490	ENSG00000172795	0.261615	1.11619370081861e-05	8.89098284950977e-05	1.12544	up	DCP2
	2493	ENSG00000114439	0.310678	1.12106630456126e-05	8.92620905792434e-05	1.32382	up	BBX
	2495	ENSG00000198839	0.289453	1.15679405248527e-05	9.19959842943162e-05	1.23649	up	ZNF277
	2498	ENSG00000206530	0.711891	1.17721889627305e-05	9.35452578657693e-05	2.72701	up	CFAP44
	2500	ENSG00000138757	0.223776	1.18044901855679e-05	9.36892803919409e-05	0.96504	up	G3BP2
	2501	ENSG00000151233	0.376896	1.19764382143042e-05	9.49779456147177e-05	1.57931	up	GXYLT1
	2502	ENSG00000165632	0.379148	1.20571854684053e-05	9.55800716099976e-05	1.58594	up	TAF3
	2503	ENSG00000286707	0.80373	1.21003391315032e-05	9.58838223905601e-05	3.14661	up	NA
	2505	ENSG00000179456	0.377109	1.21059659180366e-05	9.58900840155789e-05	1.58262	up	ZBTB18
	2506	ENSG00000138385	0.149763	1.21961781563016e-05	9.65275162182975e-05	0.650481	up	SSB
	2512	ENSG00000163946	0.264759	1.2301636777541e-05	9.73233243222376e-05	1.13268	up	TASOR
	2516	ENSG00000079482	0.741356	1.25442991623928e-05	9.90060808891721e-05	2.70845	up	OPHN1
	2517	ENSG00000100281	0.241877	1.27490150199714e-05	0.000100462	1.03647	up	HMGXB4
	2522	ENSG00000159217	0.199624	1.2787119039516e-05	0.000100722	0.860314	up	IGF2BP1
	2523	ENSG00000118217	0.262622	1.29622794975332e-05	0.000101899	1.12049	up	ATF6
	2526	ENSG00000115232	0.538219	1.29773635338122e-05	0.000101958	2.15208	up	ITGA4
	2527	ENSG00000005073	0.320204	1.30081124192574e-05	0.000102098	1.35154	up	HOXA11
	2533	ENSG00000154217	0.359237	1.30144685705141e-05	0.000102107	1.4995	up	PITPNC1
	2534	ENSG00000114933	0.547952	1.34216378380208e-05	0.000105052	2.18934	up	INO80D
	2535	ENSG00000119041	0.264273	1.34784963082443e-05	0.000105456	1.1254	up	GTF3C3
	2537	ENSG00000102531	0.454504	1.35379876597062e-05	0.000105879	1.85803	up	FNDC3A
	2540	ENSG00000175216	0.301255	1.36253567839065e-05	0.000106479	1.27334	up	CKAP5
	2541	ENSG00000121210	0.380498	1.37914617545547e-05	0.000107649	1.57478	up	TMEM131L
	2543	ENSG00000173230	0.515514	1.38582084524374e-05	0.000108128	2.06892	up	GOLGB1
	2544	ENSG00000289811	0.461076	1.39417444940677e-05	0.000108694	1.86344	up	FAM95A
	2545	ENSG00000077235	0.323164	1.40527841474425e-05	0.000109517	1.35759	up	GTF3C1
	2546	ENSG00000102678	0.704056	1.40943544407781e-05	0.000109787	2.65946	up	FGF9
	2547	ENSG00000198346	0.553062	1.40985074844153e-05	0.000109787	2.19176	up	ZNF813
	2549	ENSG00000123352	0.219766	1.41404449809593e-05	0.00011007	0.940013	up	SPATS2
	2551	ENSG00000123200	0.378099	1.41638864476e-05	0.000110166	1.5693	up	ZC3H13
	2553	ENSG00000229676	0.668956	1.42687065091841e-05	0.000110894	2.56214	up	ZNF492
	2556	ENSG00000163607	0.271697	1.43288815632273e-05	0.000111275	1.15177	up	GTPBP8
	2558	ENSG00000011332	0.376538	1.45706648692912e-05	0.00011302	1.56335	up	DPF1
	2559	ENSG00000138468	0.393897	1.47103519321354e-05	0.000114014	1.62743	up	SENP7
	2560	ENSG00000137574	0.246653	1.47755131046521e-05	0.000114474	1.04845	up	TGS1
	2562	ENSG00000149308	0.406431	1.48404614031377e-05	0.000114932	1.67304	up	NPAT
	2563	ENSG00000114999	0.355165	1.49933642155278e-05	0.000116026	1.47811	up	TTL
	2567	ENSG00000148842	0.375693	1.50724553550348e-05	0.000116592	1.55725	up	CNNM2
	2568	ENSG00000069329	0.142609	1.52869152164879e-05	0.000118067	0.612684	up	VPS35
	2569	ENSG00000085832	0.330269	1.53339546490786e-05	0.000118384	1.38025	up	EPS15
	2570	ENSG00000169519	0.408367	1.53479386981845e-05	0.000118446	1.67958	up	METTL15
	2573	ENSG00000124177	0.37589	1.53683067955933e-05	0.000118511	1.55367	up	CHD6
	2576	ENSG00000188647	0.337688	1.54781154406561e-05	0.000119265	1.40894	up	PTAR1
	2579	ENSG00000163960	0.210046	1.57198644413451e-05	0.000120987	0.89454	up	UBXN7
	2582	ENSG00000072415	0.461131	1.58952660807773e-05	0.000122194	1.86595	up	PALS1
	2583	ENSG00000170471	0.365915	1.65179501639082e-05	0.000126834	1.51253	up	RALGAPB
	2584	ENSG00000058668	0.260913	1.65329959449712e-05	0.0001269	1.1002	up	ATP2B4
	2586	ENSG00000198315	0.444211	1.66316841122171e-05	0.000127608	1.80346	up	ZKSCAN8
	2589	ENSG00000143437	0.280608	1.67725142270772e-05	0.00012856	1.17783	up	ARNT
	2590	ENSG00000254726	0.439201	1.68702148730023e-05	0.000129188	1.78356	up	MEX3A
	2593	ENSG00000109654	0.372993	1.68797403632033e-05	0.000129211	1.53765	up	TRIM2
	2596	ENSG00000006715	0.254863	1.69524169883522e-05	0.000129618	1.07439	up	VPS41
	2598	ENSG00000128585	0.350945	1.70380851603986e-05	0.000130163	1.4532	up	MKLN1
	2600	ENSG00000140575	0.285483	1.70739530346824e-05	0.000130296	1.19638	up	IQGAP1
	2602	ENSG00000005810	0.431371	1.74350851763236e-05	0.000132938	1.74932	up	MYCBP2
	2604	ENSG00000125686	0.364821	1.7447051044841e-05	0.000132938	1.50315	up	MED1
	2605	ENSG00000134352	0.551917	1.75527182844509e-05	0.000133641	2.16018	up	IL6ST
	2606	ENSG00000153815	0.406971	1.76488120029882e-05	0.000134321	1.65615	up	CMIP
	2607	ENSG00000164237	0.297026	1.76662801919379e-05	0.000134402	1.24072	up	CMBL
	2609	ENSG00000177311	0.41554	1.77081078812565e-05	0.000134669	1.68824	up	ZBTB38
	2610	ENSG00000145147	0.347569	1.78190835193915e-05	0.000135409	1.43493	up	SLIT2
	2612	ENSG00000011405	0.434659	1.79835087838316e-05	0.000136606	1.76033	up	PIK3C2A
	2613	ENSG00000125249	0.393032	1.82601605918402e-05	0.000138601	1.60769	up	RAP2A
	2615	ENSG00000021574	0.298536	1.82935112236152e-05	0.000138801	1.24488	up	SPAST
	2616	ENSG00000180233	0.803831	1.83272758592172e-05	0.000138907	2.8386	up	ZNRF2
	2617	ENSG00000216775	0.327511	1.83285476688037e-05	0.000138907	1.35869	up	LOC730101
	2618	ENSG00000138646	0.344678	1.84186912433062e-05	0.000139537	1.42259	up	HERC5
	2619	ENSG00000130559	0.260715	1.84376581912245e-05	0.000139574	1.09201	up	CAMSAP1
	2620	ENSG00000131127	0.372029	1.84327032661518e-05	0.000139574	1.52838	up	ZNF141
	2621	ENSG00000061676	0.308353	1.84569719457424e-05	0.000139667	1.28185	up	NCKAP1
	2622	ENSG00000111885	0.441664	1.84998012625868e-05	0.000139938	1.77773	up	MAN1A1
	2623	ENSG00000166783	0.386244	1.85959309070502e-05	0.000140611	1.57837	up	MARF1
	2628	ENSG00000111832	0.201731	1.86338261611959e-05	0.000140844	0.852618	up	RWDD1
	2632	ENSG00000080298	0.489503	1.88518636651527e-05	0.000142221	1.94911	up	RFX3
	2633	ENSG00000185728	0.272254	1.92876508723473e-05	0.000145288	1.13706	up	YTHDF3
	2634	ENSG00000071054	0.317407	1.93073728382956e-05	0.000145381	1.31371	up	MAP4K4
	2637	ENSG00000119042	0.428129	1.93329836086659e-05	0.000145519	1.72971	up	SATB2
	2638	ENSG00000152413	0.406732	1.95157365198061e-05	0.000146727	1.65117	up	HOMER1
	2640	ENSG00000171206	0.37658	1.95550784334332e-05	0.000146967	1.54041	up	TRIM8
	2641	ENSG00000120063	0.301924	1.98519521700619e-05	0.000149085	1.25149	up	GNA13
	2645	ENSG00000171492	0.237193	1.98707602550264e-05	0.000149113	0.993625	up	LRRC8D
	2646	ENSG00000188738	0.746535	2.02593592974399e-05	0.000151857	2.76106	up	FSIP2
	2647	ENSG00000077684	0.297409	2.03490143050727e-05	0.000152471	1.23246	up	JADE1
	2648	ENSG00000124535	0.278446	2.03673212790689e-05	0.000152551	1.15748	up	WRNIP1
	2651	ENSG00000086200	0.28764	2.04308315692624e-05	0.00015296	1.19411	up	IPO11
	2652	ENSG00000171791	0.510592	2.05684484385435e-05	0.000153825	2.02373	up	BCL2
	2654	ENSG00000123213	0.276231	2.08359366750868e-05	0.000155767	1.14812	up	NLN
	2656	ENSG00000154479	0.640358	2.09495995487887e-05	0.000156498	2.47984	up	CFAP210
	2659	ENSG00000196119	1.17056	2.11117069890357e-05	0.000157591	3.84325	up	OR8A1
	2661	ENSG00000164164	0.467242	2.13458215688716e-05	0.000159158	1.85589	up	OTUD4
	2662	ENSG00000182141	0.698726	2.14875213211244e-05	0.000160095	2.58873	up	ZNF708
	2663	ENSG00000112874	0.321549	2.15243617230106e-05	0.000160309	1.32095	up	NUDT12
	2666	ENSG00000269821	0.464708	2.15366475741186e-05	0.00016034	1.85712	up	KCNQ1OT1
	2669	ENSG00000134644	0.269662	2.18816640153514e-05	0.000162664	1.11847	up	PUM1
	2670	ENSG00000084676	0.329634	2.20258570133193e-05	0.000163614	1.35095	up	NCOA1
	2672	ENSG00000171723	0.337217	2.20341607273006e-05	0.000163614	1.38204	up	GPHN
	2674	ENSG00000258636	0.929948	2.2205810282287e-05	0.000164765	3.19318	up	NA
	2676	ENSG00000152582	0.628807	2.24521236172644e-05	0.000166468	2.37027	up	SPEF2
	2677	ENSG00000157764	0.332592	2.27895082603902e-05	0.000168843	1.36053	up	BRAF
	2678	ENSG00000106462	0.163693	2.28499404111918e-05	0.000169165	0.687401	up	EZH2
	2679	ENSG00000106609	0.306643	2.2842583965291e-05	0.000169165	1.26114	up	TMEM248
	2680	ENSG00000064419	0.272895	2.29026661461541e-05	0.00016945	1.12835	up	TNPO3
	2686	ENSG00000187720	0.332266	2.29056116095836e-05	0.00016945	1.34971	up	THSD4
	2687	ENSG00000170004	0.227557	2.33078732927173e-05	0.000172041	0.9471	up	CHD3
	2688	ENSG00000148840	0.374393	2.36756513146962e-05	0.000174691	1.5144	up	PPRC1
	2689	ENSG00000120802	0.28644	2.39543633365142e-05	0.000176681	1.17893	up	TMPO
	2690	ENSG00000247199	0.741753	2.40545109524454e-05	0.000177354	2.71183	up	FBXO38-DT
	2691	ENSG00000114573	0.246995	2.40929903885955e-05	0.000177572	1.02335	up	ATP6V1A
	2692	ENSG00000187257	0.309855	2.42396083613095e-05	0.000178586	1.26969	up	RSBN1L
	2693	ENSG00000104375	0.321933	2.43211006211737e-05	0.00017912	1.31626	up	STK3
	2695	ENSG00000116406	0.360869	2.44252796795176e-05	0.00017982	1.46372	up	EDEM3
	2696	ENSG00000117000	0.351202	2.45801372778398e-05	0.000180719	1.42465	up	RLF
	2700	ENSG00000165490	0.351639	2.45837706555161e-05	0.000180719	1.42771	up	DDIAS
	2701	ENSG00000244754	0.222042	2.47970707852626e-05	0.000182084	0.921793	up	N4BP2L2
	2702	ENSG00000127603	0.385467	2.49173392356908e-05	0.000182832	1.5518	up	MACF1
	2703	ENSG00000182150	0.499351	2.49085363425874e-05	0.000182832	1.95298	up	ERCC6L2
	2707	ENSG00000172175	0.414203	2.49650248236933e-05	0.000183114	1.65448	up	MALT1
	2709	ENSG00000164118	0.311891	2.53537302113571e-05	0.00018569	1.27368	up	CEP44
	2710	ENSG00000213885	0.522993	2.6039685482359e-05	0.000190573	2.01413	up	NA
	2711	ENSG00000142556	0.297927	2.60799504648617e-05	0.000190797	1.22124	up	ZNF614
	2713	ENSG00000151748	0.40502	2.61676165346053e-05	0.000191368	1.61868	up	SAV1
	2714	ENSG00000204256	0.229985	2.63450618635714e-05	0.000192524	0.950549	up	BRD2
	2715	ENSG00000136937	0.299041	2.6513326273618e-05	0.000193682	1.22158	up	NCBP1
	2716	ENSG00000197603	0.713708	2.65324256278328e-05	0.00019375	2.58792	up	CPLANE1
	2717	ENSG00000118922	0.547579	2.65534674838404e-05	0.000193832	2.1039	up	KLF12
	2723	ENSG00000006453	0.291941	2.66240655395923e-05	0.000194276	1.19435	up	BAIAP2L1
	2724	ENSG00000147654	0.20601	2.71915113532359e-05	0.000198029	0.85314	up	EBAG9
	2726	ENSG00000101654	0.306844	2.72538632811152e-05	0.000198361	1.24973	up	RNMT
	2732	ENSG00000162402	0.384036	2.73413595166027e-05	0.000198852	1.53879	up	USP24
	2734	ENSG00000213390	0.257595	2.77657394730817e-05	0.000201495	1.05761	up	ARHGAP19
	2738	ENSG00000018408	0.310882	2.85238171788337e-05	0.000206845	1.26109	up	WWTR1
	2739	ENSG00000134909	0.427555	2.89575671537424e-05	0.000209683	1.68439	up	ARHGAP32
	2741	ENSG00000156140	0.504631	2.8980503815706e-05	0.000209773	1.95446	up	ADAMTS3
	2745	ENSG00000075945	0.38948	2.94606159605635e-05	0.000213092	1.55203	up	KIFAP3
	2749	ENSG00000175073	0.416254	2.98345753889795e-05	0.000215483	1.64671	up	VCPIP1
	2750	ENSG00000011258	0.405286	3.10639386601454e-05	0.000224036	1.60218	up	MBTD1
	2755	ENSG00000134324	0.339077	3.11276782713149e-05	0.000224414	1.36233	up	LPIN1
	2756	ENSG00000137942	0.449235	3.14982284663608e-05	0.000226673	1.75998	up	FNBP1L
	2758	ENSG00000250568	0.650487	3.15672846745637e-05	0.000227087	2.45547	up	NA
	2760	ENSG00000198682	0.503264	3.20081481605945e-05	0.000230092	1.93989	up	PAPSS2
	2761	ENSG00000110060	0.301267	3.20775161346252e-05	0.000230423	1.21825	up	PUS3
	2763	ENSG00000085276	0.324479	3.22132147150468e-05	0.000231314	1.30445	up	MECOM
	2768	ENSG00000171763	0.372535	3.24473200228657e-05	0.000232827	1.4805	up	SPATA5L1
	2770	ENSG00000101115	0.275237	3.31965757414901e-05	0.000237773	1.11571	up	SALL4
	2772	ENSG00000055208	0.395725	3.36333285305435e-05	0.00024064	1.56454	up	TAB2
	2773	ENSG00000113569	0.255109	3.36733247658922e-05	0.00024084	1.03631	up	NUP155
	2775	ENSG00000089902	0.418604	3.38898599345156e-05	0.000242214	1.64296	up	RCOR1
	2777	ENSG00000047315	0.251711	3.3935432561296e-05	0.000242452	1.02308	up	POLR2B
	2782	ENSG00000109606	0.218177	3.43825062963335e-05	0.000245469	0.890264	up	DHX15
	2783	ENSG00000131626	0.389859	3.50895993215458e-05	0.000250067	1.53729	up	PPFIA1
	2784	ENSG00000151461	0.265017	3.52868421753683e-05	0.000251382	1.07218	up	UPF2
	2786	ENSG00000094975	0.325958	3.5997105785507e-05	0.00025635	1.30397	up	SUCO
	2792	ENSG00000170049	0.452661	3.67168330674914e-05	0.000261288	1.76152	up	KCNAB3
	2795	ENSG00000128872	0.328273	3.73841428609258e-05	0.000265465	1.30909	up	TMOD2
	2796	ENSG00000154822	0.314048	3.76822268847436e-05	0.000267294	1.2496	up	PLCL2
	2797	ENSG00000165417	0.305468	3.80132845478124e-05	0.000269546	1.22231	up	GTF2A1
	2799	ENSG00000125484	0.377397	3.80699399047486e-05	0.000269851	1.48733	up	GTF3C4
	2802	ENSG00000103642	0.193692	3.86093855134401e-05	0.00027348	0.787918	up	LACTB
	2806	ENSG00000162437	0.37877	3.93584228297215e-05	0.000278487	1.48928	up	RAVER2
	2807	ENSG00000101210	0.279151	4.02622087936563e-05	0.000284476	1.11811	up	EEF1A2
	2813	ENSG00000153989	0.352199	4.05950049044511e-05	0.000286623	1.39178	up	NUS1
	2814	ENSG00000124214	0.22806	4.14941142006654e-05	0.00029245	0.919777	up	STAU1
	2816	ENSG00000116918	0.193134	4.16311269731305e-05	0.000293312	0.782502	up	TSNAX
	2817	ENSG00000196922	0.351722	4.19712202732248e-05	0.000295498	1.38941	up	ZNF252P
	2818	ENSG00000075213	0.691922	4.20481367852705e-05	0.000295934	2.47046	up	SEMA3A
	2819	ENSG00000164099	0.423598	4.2082360193638e-05	0.00029607	1.6392	up	PRSS12
	2821	ENSG00000269973	0.727741	4.21735878175925e-05	0.000296606	2.55253	up	NA
	2822	ENSG00000173276	0.433351	4.23477929521265e-05	0.00029762	1.67339	up	ZBTB21
	2823	ENSG00000173114	0.910684	4.2389911889956e-05	0.000297811	3.28273	up	LRRN3
	2824	ENSG00000157895	0.267861	4.24376006725872e-05	0.00029804	1.07256	up	C12orf43
	2826	ENSG00000124795	0.236233	4.26037011617747e-05	0.000299101	0.950076	up	DEK
	2827	ENSG00000005339	0.290396	4.26924798960789e-05	0.000299512	1.15667	up	CREBBP
	2829	ENSG00000111912	0.374731	4.28072825962437e-05	0.000300211	1.46848	up	NCOA7
	2830	ENSG00000114166	0.467135	4.34665181564254e-05	0.000304619	1.78524	up	KAT2B
	2832	ENSG00000145725	0.438384	4.40156556164998e-05	0.000308358	1.68959	up	PPIP5K2
	2833	ENSG00000163328	0.350914	4.46901837748091e-05	0.000312863	1.3798	up	GPR155
	2834	ENSG00000199994	2.03785	4.48632784358678e-05	0.000313964	2.72322	up	RNA5SP145
	2836	ENSG00000081377	0.294734	4.49619411702555e-05	0.000314543	1.17025	up	CDC14B
	2838	ENSG00000139505	0.342753	4.50617571434202e-05	0.000315019	1.34733	up	MTMR6
	2841	ENSG00000144369	0.321197	4.54969956005255e-05	0.000317838	1.27014	up	FAM171B
	2843	ENSG00000205269	0.404082	4.59724442211409e-05	0.00032082	1.56722	up	TMEM170B
	2845	ENSG00000162702	0.385219	4.62018848724305e-05	0.000322194	1.49969	up	ZNF281
	2846	ENSG00000117411	0.234514	4.67372531952563e-05	0.000325699	0.938185	up	B4GALT2
	2848	ENSG00000130821	0.163092	4.68935428940381e-05	0.000326673	0.658139	up	SLC6A8
	2851	ENSG00000277806	1.40267	4.71240741656979e-05	0.000328048	3.90131	up	NA
	2853	ENSG00000107929	0.288632	4.77679981996067e-05	0.000332065	1.14329	up	LARP4B
	2855	ENSG00000219626	0.720209	4.82709054619597e-05	0.000335443	2.55447	up	FAM228B
	2858	ENSG00000156876	0.356054	4.84638335121946e-05	0.000336548	1.39133	up	SASS6
	2859	ENSG00000110693	0.510744	4.89185166745313e-05	0.000339349	1.91258	up	SOX6
	2863	ENSG00000170248	0.236841	4.89962322828256e-05	0.000339769	0.944721	up	PDCD6IP
	2864	ENSG00000182389	0.578206	4.9982213520791e-05	0.000346122	2.13198	up	CACNB4
	2866	ENSG00000175931	0.316182	5.03723679930453e-05	0.000348702	1.24229	up	UBE2O
	2869	ENSG00000177485	0.609384	5.09586615010095e-05	0.000352514	2.21728	up	ZBTB33
	2870	ENSG00000051382	0.362443	5.1225116923345e-05	0.000353884	1.40815	up	PIK3CB
	2871	ENSG00000129083	0.318422	5.12280016138309e-05	0.000353884	1.24932	up	COPB1
	2872	ENSG00000129422	0.364411	5.14797193141321e-05	0.000355499	1.41607	up	MTUS1
	2873	ENSG00000166501	0.641766	5.19580737620939e-05	0.000358677	2.25913	up	PRKCB
	2874	ENSG00000089154	0.213831	5.20757031959998e-05	0.000359133	0.852303	up	GCN1
	2876	ENSG00000116731	0.436277	5.20768660201301e-05	0.000359133	1.66577	up	PRDM2
	2878	ENSG00000123094	0.534497	5.2227926174065e-05	0.000360039	1.98492	up	RASSF8
	2879	ENSG00000166004	0.397914	5.26010204703185e-05	0.000362359	1.53328	up	CEP295
	2881	ENSG00000074047	0.313968	5.26547979938451e-05	0.000362603	1.23032	up	GLI2
	2882	ENSG00000143674	0.404761	5.308691661041e-05	0.000365325	1.55539	up	MAP3K21
	2883	ENSG00000130338	0.271403	5.32023912457393e-05	0.000365888	1.07292	up	TULP4
	2887	ENSG00000136636	0.275205	5.32056572826818e-05	0.000365888	1.08635	up	KCTD3
	2889	ENSG00000119953	0.247927	5.37053097583897e-05	0.000368812	0.982728	up	SMNDC1
	2892	ENSG00000167986	0.211747	5.38997214825737e-05	0.000369891	0.842912	up	DDB1
	2893	ENSG00000198743	0.419485	5.39853294190059e-05	0.000370094	1.60605	up	SLC5A3
	2894	ENSG00000274422	1.41372	5.419725571762e-05	0.000371419	3.45666	up	NA
	2900	ENSG00000111145	0.539013	5.45836521491822e-05	0.000373938	1.99385	up	ELK3
	2902	ENSG00000131503	0.421155	5.62756214440146e-05	0.000384731	1.59627	up	ANKHD1
	2903	ENSG00000114450	0.278389	5.66132261633063e-05	0.000386773	1.09414	up	GNB4
	2905	ENSG00000090863	0.180291	5.68863738216686e-05	0.000388505	0.718234	up	GLG1
	2906	ENSG00000232593	0.504086	5.78598078375624e-05	0.000394881	1.88333	up	KANTR
	2908	ENSG00000116514	0.496974	5.79150881180661e-05	0.000395122	1.84536	up	RNF19B
	2909	ENSG00000149212	0.565775	5.80096357414799e-05	0.000395495	2.05793	up	SESN3
	2910	ENSG00000005801	0.293104	5.81384599191464e-05	0.000396237	1.14729	up	ZNF195
	2913	ENSG00000080200	0.685809	5.82601447108884e-05	0.00039693	2.39122	up	CRYBG3
	2915	ENSG00000111300	0.29501	5.8741514338625e-05	0.000399797	1.15337	up	NAA25
	2920	ENSG00000127947	0.38956	5.90407004546034e-05	0.000401558	1.49322	up	PTPN12
	2922	ENSG00000112992	0.225071	5.96156388678666e-05	0.000404774	0.888651	up	NNT
	2929	ENSG00000080802	0.440268	6.05145229070582e-05	0.000410596	1.66575	up	CNOT4
	2930	ENSG00000137642	0.343849	6.16729772794601e-05	0.000417313	1.32627	up	SORL1
	2931	ENSG00000153914	0.291319	6.16548926316345e-05	0.000417313	1.13621	up	SREK1
	2932	ENSG00000048392	0.294041	6.17907519954264e-05	0.000417862	1.14747	up	RRM2B
	2934	ENSG00000122417	0.603862	6.17961857694641e-05	0.000417862	2.18699	up	ODF2L
	2937	ENSG00000153132	0.279288	6.20370261661932e-05	0.000419205	1.09011	up	CLGN
	2938	ENSG00000152926	0.905496	6.25963684740485e-05	0.000422552	2.99884	up	ZNF117
	2945	ENSG00000114867	0.223548	6.31098202285778e-05	0.000425728	0.880376	up	EIF4G1
	2948	ENSG00000133026	0.277228	6.45530805917711e-05	0.00043443	1.08156	up	MYH10
	2949	ENSG00000278311	0.254598	6.47455793544213e-05	0.000435429	0.99634	up	GGNBP2
	2950	ENSG00000272293	0.763095	6.47755334579442e-05	0.000435483	2.69938	up	NA
	2952	ENSG00000113141	0.225434	6.48348521875813e-05	0.000435734	0.886122	up	IK
	2953	ENSG00000073169	0.264414	6.52692984684179e-05	0.000438208	1.03005	up	SELENOO
	2955	ENSG00000180398	0.231944	6.52557911512511e-05	0.000438208	0.910685	up	MCFD2
	2958	ENSG00000166855	0.209762	6.63561602758865e-05	0.000445184	0.825172	up	CLPX
	2959	ENSG00000047365	0.705516	6.78232797896093e-05	0.000454586	2.46162	up	ARAP2
	2960	ENSG00000170561	0.346126	6.79642194148114e-05	0.000455376	1.32744	up	IRX2
	2962	ENSG00000071205	0.300884	6.82979909984894e-05	0.000457458	1.16448	up	ARHGAP10
	2963	ENSG00000131711	0.295237	6.85464431669638e-05	0.000458812	1.14362	up	MAP1B
	2965	ENSG00000171914	0.351851	6.86460482311851e-05	0.000459324	1.34437	up	TLN2
	2972	ENSG00000131437	0.403164	6.89714552850712e-05	0.00046119	1.52539	up	KIF3A
	2973	ENSG00000197006	0.235601	7.00633507398486e-05	0.000467388	0.920505	up	METTL9
	2975	ENSG00000151553	0.682463	7.01916453472611e-05	0.000468086	2.35105	up	FHIP2A
	2978	ENSG00000133835	0.236562	7.07957777480991e-05	0.000471797	0.923413	up	HSD17B4
	2979	ENSG00000164187	0.37757	7.21818255770375e-05	0.00048055	1.43085	up	LMBRD2
	2981	ENSG00000164659	0.36811	7.28267446901905e-05	0.00048468	1.39889	up	ELAPOR2
	2985	ENSG00000132688	0.252363	7.37562068662301e-05	0.000490537	0.980776	up	NES
	2988	ENSG00000114742	0.341082	7.46021471126114e-05	0.000495498	1.30294	up	WDR48
	2992	ENSG00000091527	0.281729	7.59484799026106e-05	0.000503765	1.08733	up	CDV3
	2995	ENSG00000163625	0.493805	7.80431449363402e-05	0.00051714	1.80939	up	WDFY3
	2996	ENSG00000157827	0.467125	7.85400383191558e-05	0.000519911	1.72329	up	FMNL2
	2998	ENSG00000176624	0.370974	7.87137076304548e-05	0.000520887	1.40221	up	MEX3C
	3003	ENSG00000163788	0.473363	7.92173421832708e-05	0.000523696	1.74027	up	SNRK
	3004	ENSG00000116001	0.275082	8.07185718354161e-05	0.000532909	1.05951	up	TIA1
	3006	ENSG00000198865	0.420028	8.07460652685916e-05	0.000532913	1.56403	up	CCDC152
	3008	ENSG00000196586	0.355775	8.15029857568838e-05	0.000537647	1.34639	up	MYO6
	3009	ENSG00000157540	0.408861	8.15866177863695e-05	0.000537839	1.52835	up	DYRK1A
	3011	ENSG00000179387	0.30416	8.23445978097659e-05	0.00054256	1.1631	up	ELMOD2
	3012	ENSG00000178104	0.403715	8.33095121414379e-05	0.000548553	1.51106	up	PDE4DIP
	3015	ENSG00000236287	0.312954	8.34846381103533e-05	0.000549524	1.1944	up	ZBED5
	3017	ENSG00000146833	0.494168	8.44076078928072e-05	0.000555047	1.77396	up	TRIM4
	3020	ENSG00000138685	0.417287	8.47793595174775e-05	0.000557122	1.55141	up	FGF2
	3021	ENSG00000165997	0.395262	8.69478643265726e-05	0.000570804	1.47904	up	ARL5B
	3022	ENSG00000107731	0.373806	8.70772111174355e-05	0.000571458	1.40015	up	UNC5B
	3023	ENSG00000108021	0.442401	8.71050851181588e-05	0.000571458	1.63466	up	TASOR2
	3027	ENSG00000091844	0.571453	8.72526616299157e-05	0.000572237	2.04348	up	RGS17
	3028	ENSG00000124831	0.27163	8.88390430362818e-05	0.000581871	1.04021	up	LRRFIP1
	3030	ENSG00000074695	0.286649	8.96787530253242e-05	0.000587177	1.09418	up	LMAN1
	3034	ENSG00000147364	0.303939	9.01049172838543e-05	0.000589578	1.15477	up	FBXO25
	3035	ENSG00000158195	0.222077	9.11931336939828e-05	0.000595911	0.855412	up	WASF2
	3036	ENSG00000182263	0.544002	9.12724402157315e-05	0.000596233	1.95029	up	FIGN
	3039	ENSG00000136381	0.254962	9.13557937578707e-05	0.000596581	0.977407	up	IREB2
	3040	ENSG00000247746	0.959687	9.19146965196452e-05	0.000599638	2.95786	up	USP51
	3046	ENSG00000121741	0.378842	9.2005126396544e-05	0.000600031	1.41704	up	ZMYM2
	3049	ENSG00000048028	0.304503	9.41179590477564e-05	0.000612601	1.15509	up	USP28
	3051	ENSG00000136603	0.363586	9.53552106869538e-05	0.000620242	1.36266	up	SKIL
	3053	ENSG00000081386	0.868521	9.60565242521087e-05	0.000624194	2.82416	up	ZNF510
	3055	ENSG00000186439	0.902624	9.67932923640182e-05	0.00062857	2.86952	up	TRDN
	3056	ENSG00000091542	0.254917	9.75306885308114e-05	0.000632944	0.973831	up	ALKBH5
	3057	ENSG00000131375	0.424435	9.78423691482653e-05	0.000634759	1.56378	up	CAPN7
	3058	ENSG00000139800	0.533521	9.84173488602298e-05	0.00063828	1.90067	up	ZIC5
	3059	ENSG00000121957	0.347778	9.86061778462309e-05	0.000639296	1.30542	up	GPSM2
	3062	ENSG00000197063	0.296731	9.89574701599468e-05	0.000641363	1.12493	up	MAFG
	3063	ENSG00000175745	0.354943	9.94348208406413e-05	0.000643826	1.32818	up	NR2F1
	3065	ENSG00000197343	0.316894	9.95504445864045e-05	0.000644364	1.19572	up	ZNF655
	3066	ENSG00000150527	0.368036	0.000100035	0.000647077	1.37325	up	MIA2
	3068	ENSG00000261115	0.525771	0.000100779	0.000651675	1.87789	up	TMEM178B
	3069	ENSG00000148110	0.330683	0.000101165	0.000653747	1.24245	up	MFSD14B
	3070	ENSG00000071564	0.27114	0.000101603	0.000656365	1.0297	up	TCF3
	3071	ENSG00000101266	0.156733	0.000101714	0.00065687	0.604449	up	CSNK2A1
	3073	ENSG00000095951	0.617809	0.000102401	0.000661087	2.13186	up	HIVEP1
	3074	ENSG00000103356	0.244905	0.000103595	0.000668363	0.933004	up	EARS2
	3076	ENSG00000047188	0.481847	0.000103985	0.000670658	1.74145	up	YTHDC2
	3079	ENSG00000102580	0.262822	0.000104896	0.000676097	0.997692	up	DNAJC3
	3080	ENSG00000117593	0.262131	0.000105921	0.000681814	0.994694	up	DARS2
	3082	ENSG00000175087	0.523941	0.000105888	0.000681814	1.8702	up	PDIK1L
	3083	ENSG00000268205	0.381436	0.000106073	0.000682348	1.4169	up	NA
	3084	ENSG00000179455	0.671435	0.000106301	0.000683594	2.2932	up	MKRN3
	3086	ENSG00000044115	0.194663	0.000106649	0.00068561	0.745364	up	CTNNA1
	3089	ENSG00000147649	0.235182	0.000107784	0.000692457	0.894963	up	MTDH
	3091	ENSG00000146414	0.463291	0.0001084	0.00069574	1.67653	up	SHPRH
	3092	ENSG00000155858	0.352124	0.000108889	0.0006982	1.30877	up	LSM11
	3095	ENSG00000180357	0.242021	0.000108883	0.0006982	0.91907	up	ZNF609
	3100	ENSG00000120278	0.376798	0.000109389	0.000700497	1.39712	up	PLEKHG1
	3103	ENSG00000164252	0.245949	0.000110281	0.0007053	0.933517	up	AGGF1
	3104	ENSG00000067715	0.64905	0.000111399	0.000711743	2.21919	up	SYT1
	3105	ENSG00000170468	0.336094	0.000111432	0.000711743	1.25225	up	RIOX1
	3107	ENSG00000109381	0.312591	0.0001115	0.000711948	1.17231	up	ELF2
	3109	ENSG00000113657	0.307991	0.000111852	0.000713734	1.15326	up	DPYSL3
	3111	ENSG00000088888	0.328471	0.000112688	0.000718607	1.2265	up	MAVS
	3113	ENSG00000260400	0.580139	0.000113205	0.00072144	2.02593	up	NA
	3114	ENSG00000215457	0.761072	0.000113695	0.000724099	2.5809	up	RPS8P3
	3119	ENSG00000148396	0.353599	0.000114757	0.000730624	1.31114	up	SEC16A
	3120	ENSG00000198752	0.352937	0.000116496	0.000740511	1.30624	up	CDC42BPB
	3123	ENSG00000166033	0.580897	0.000116665	0.000741348	1.97234	up	HTRA1
	3125	ENSG00000153707	0.453627	0.000117657	0.000746934	1.63315	up	PTPRD
	3126	ENSG00000151090	0.386276	0.000117735	0.000746986	1.41756	up	THRB
	3127	ENSG00000119912	0.389855	0.000117875	0.000747595	1.43209	up	IDE
	3128	ENSG00000159267	0.399792	0.000117972	0.000747973	1.46062	up	HLCS
	3129	ENSG00000187239	0.28748	0.000118242	0.000749443	1.07896	up	FNBP1
	3130	ENSG00000067177	0.373198	0.000118321	0.000749707	1.3688	up	PHKA1
	3131	ENSG00000197442	0.499197	0.000118429	0.000749977	1.77538	up	MAP3K5
	3133	ENSG00000237289	0.471133	0.000118439	0.000749977	1.70703	up	CKMT1B
	3137	ENSG00000196074	0.755727	0.000119319	0.000755066	2.58322	up	SYCP2
	3140	ENSG00000109794	0.572035	0.000119934	0.000757989	1.96737	up	FAM149A
	3141	ENSG00000118971	0.304177	0.00012047	0.00076073	1.13663	up	CCND2
	3142	ENSG00000118407	0.400198	0.000121087	0.000764303	1.46955	up	FILIP1
	3144	ENSG00000142731	0.27531	0.000121944	0.000769467	1.03301	up	PLK4
	3146	ENSG00000187140	0.575233	0.000122998	0.000775626	1.97477	up	FOXD3
	3148	ENSG00000008086	0.552218	0.000123453	0.000777999	1.93072	up	CDKL5
	3150	ENSG00000197044	0.554624	0.000125245	0.000788792	1.93875	up	ZNF441
	3152	ENSG00000144895	0.245387	0.000125691	0.000791097	0.923525	up	EIF2A
	3153	ENSG00000172986	0.496651	0.000125981	0.000792419	1.74645	up	GXYLT2
	3154	ENSG00000139132	0.680515	0.000126261	0.000793571	2.26947	up	FGD4
	3157	ENSG00000140015	0.777866	0.000126257	0.000793571	2.44921	up	KCNH5
	3159	ENSG00000171365	0.355081	0.000126524	0.000794572	1.30948	up	CLCN5
	3162	ENSG00000061936	0.302256	0.000127224	0.000798461	1.12507	up	SFSWAP
	3167	ENSG00000065883	0.42164	0.000127973	0.000802404	1.52814	up	CDK13
	3168	ENSG00000197930	0.297319	0.000129411	0.000810138	1.10685	up	ERO1A
	3170	ENSG00000203326	0.587416	0.000129506	0.00081022	2.03332	up	ZNF525
	3171	ENSG00000196233	0.348876	0.000129616	0.000810653	1.28604	up	LCOR
	3174	ENSG00000118263	0.351618	0.000129819	0.00081141	1.29402	up	KLF7
	3175	ENSG00000196455	0.370521	0.000131609	0.000822081	1.35905	up	PIK3R4
	3176	ENSG00000085511	0.389871	0.000132376	0.000826608	1.42184	up	MAP3K4
	3179	ENSG00000259956	0.187175	0.000133307	0.000832163	0.706951	up	RBM15B
	3180	ENSG00000119596	0.42535	0.000135512	0.000845125	1.53408	up	YLPM1
	3181	ENSG00000106723	0.380735	0.000135733	0.000846242	1.38936	up	SPIN1
	3183	ENSG00000148843	0.24388	0.000135799	0.000846384	0.913327	up	PDCD11
	3184	ENSG00000096063	0.284535	0.00013694	0.000852959	1.05802	up	SRPK1
	3185	ENSG00000158417	0.325955	0.000137003	0.000853085	1.20253	up	EIF5B
	3187	ENSG00000220804	0.4485	0.000137246	0.000854332	1.6097	up	NA
	3188	ENSG00000115548	0.287409	0.000138015	0.000858575	1.06678	up	KDM3A
	3194	ENSG00000126261	0.167781	0.000138318	0.000860194	0.633764	up	UBA2
	3195	ENSG00000127526	0.18591	0.000142371	0.000883737	0.699434	up	SLC35E1
	3196	ENSG00000289871	1.67905	0.000142511	0.000884325	4.26646	up	NA
	3197	ENSG00000108582	0.30973	0.000142603	0.000884346	1.1424	up	CPD
	3200	ENSG00000165355	0.479876	0.000142578	0.000884346	1.7013	up	FBXO33
	3201	ENSG00000131724	0.236859	0.000145029	0.000898543	0.884228	up	IL13RA1
	3202	ENSG00000180008	0.256649	0.000145575	0.000901648	0.95521	up	SOCS4
	3203	ENSG00000163527	0.302999	0.000146235	0.000905451	1.11773	up	STT3B
	3205	ENSG00000088367	0.37456	0.000146467	0.000906603	1.36202	up	EPB41L1
	3207	ENSG00000017260	0.217951	0.000147187	0.000910494	0.815077	up	ATP2C1
	3208	ENSG00000144677	0.272979	0.000148826	0.000920059	1.0108	up	CTDSPL
	3209	ENSG00000076003	0.276534	0.000149919	0.000926525	1.02351	up	MCM6
	3211	ENSG00000240673	1.02809	0.000151458	0.000935744	3.10311	up	NA
	3212	ENSG00000118246	0.267722	0.000151749	0.000936956	0.991892	up	FASTKD2
	3216	ENSG00000075391	0.457873	0.000152518	0.000941413	1.63154	up	RASAL2
	3220	ENSG00000196141	0.36146	0.000155336	0.000957318	1.31367	up	SPATS2L
	3221	ENSG00000197472	0.44883	0.000157545	0.000970029	1.59823	up	ZNF695
	3223	ENSG00000049759	0.247517	0.00015792	0.000971859	0.91659	up	NEDD4L
	3226	ENSG00000169359	0.390209	0.000158058	0.000972282	1.40634	up	SLC33A1
	3228	ENSG00000143157	0.250456	0.000159846	0.000982366	0.926681	up	POGK
	3229	ENSG00000133019	0.442693	0.000160507	0.000985813	1.5727	up	CHRM3
	3230	ENSG00000057935	0.193674	0.000160629	0.000985951	0.722074	up	MTA3
	3232	ENSG00000198142	0.301874	0.00016061	0.000985951	1.10684	up	SOWAHC
	3233	ENSG00000106771	0.306941	0.000162287	0.000995514	1.12384	up	TMEM245
	3236	ENSG00000172340	0.303488	0.000162413	0.000995976	1.11167	up	SUCLG2
	3238	ENSG00000175727	0.312234	0.000162693	0.000996774	1.14212	up	MLXIP
	3239	ENSG00000109111	0.289833	0.000163571	0.00100153	1.06335	up	SUPT6H
	3240	ENSG00000198160	0.342727	0.000163641	0.00100165	1.24633	up	MIER1
	3243	ENSG00000143207	0.2774	0.000163891	0.00100287	1.0203	up	COP1
	3246	ENSG00000145390	0.317565	0.00016496	0.00100848	1.15944	up	USP53
	3247	ENSG00000272599	0.473049	0.00016574	0.00101231	1.66955	up	NA
	3249	ENSG00000163001	0.191556	0.000165817	0.00101247	0.713355	up	CFAP36
	3250	ENSG00000164463	0.617854	0.000166435	0.00101562	2.08668	up	CREBRF
	3251	ENSG00000133687	0.485735	0.000166818	0.00101764	1.6988	up	TMTC1
	3252	ENSG00000157107	0.42756	0.000167566	0.00102189	1.52259	up	FCHO2
	3253	ENSG00000274652	1.93321	0.000168177	0.0010253	3.48129	up	NA
	3255	ENSG00000099821	0.23969	0.000168528	0.00102713	0.885239	up	POLRMT
	3257	ENSG00000176542	0.26448	0.000170031	0.00103565	0.97387	up	USF3
	3258	ENSG00000004864	0.283225	0.000171052	0.00104091	1.03823	up	SLC25A13
	3262	ENSG00000185621	0.663279	0.000171043	0.00104091	2.19493	up	LMLN
	3263	ENSG00000146242	0.263068	0.000172587	0.00104896	0.966074	up	TPBG
	3265	ENSG00000226419	0.263373	0.000172568	0.00104896	0.968281	up	SLC16A1-AS1
	3266	ENSG00000124782	0.45434	0.000173373	0.00105277	1.60177	up	RREB1
	3267	ENSG00000278730	0.40534	0.000174775	0.00106096	1.44322	up	NA
	3268	ENSG00000196177	0.333095	0.000174896	0.00106137	1.20199	up	ACADSB
	3269	ENSG00000174106	0.459092	0.000176361	0.00106993	1.61257	up	LEMD3
	3270	ENSG00000106004	0.669154	0.000176847	0.00107255	2.18744	up	HOXA5
	3271	ENSG00000198431	0.216368	0.000177694	0.00107736	0.799172	up	TXNRD1
	3273	ENSG00000004700	0.414066	0.000177939	0.00107819	1.47302	up	RECQL
	3275	ENSG00000108219	0.311317	0.00017824	0.00107968	1.13208	up	TSPAN14
	3277	ENSG00000169718	0.217154	0.000178823	0.00108255	0.801627	up	DUS1L
	3278	ENSG00000102081	0.488286	0.000180666	0.00109304	1.70037	up	FMR1
	3279	ENSG00000176444	0.391494	0.000180969	0.00109454	1.40047	up	CLK2
	3281	ENSG00000077254	0.258386	0.000181668	0.00109843	0.946876	up	USP33
	3283	ENSG00000171109	0.298005	0.000182531	0.00110297	1.08474	up	MFN1
	3285	ENSG00000242265	0.29263	0.000182946	0.00110481	1.06603	up	PEG10
	3286	ENSG00000138381	0.354861	0.000183791	0.00110923	1.27619	up	ASNSD1
	3287	ENSG00000123908	0.338606	0.000184542	0.00111325	1.22172	up	AGO2
	3291	ENSG00000163507	0.402156	0.000184569	0.00111325	1.43244	up	CIP2A
	3292	ENSG00000055483	0.245387	0.000186495	0.0011235	0.898883	up	USP36
	3294	ENSG00000117020	0.507977	0.000187021	0.00112633	1.75634	up	AKT3
	3295	ENSG00000174705	0.304345	0.00018785	0.0011309	1.10284	up	SH3PXD2B
	3296	ENSG00000137776	0.254724	0.000189055	0.00113754	0.931712	up	SLTM
	3297	ENSG00000127311	0.669511	0.000189155	0.0011378	2.17935	up	HELB
	3300	ENSG00000114948	0.350001	0.00018967	0.00114055	1.2573	up	ADAM23
	3301	ENSG00000163312	0.403638	0.00019235	0.00115561	1.43331	up	HELQ
	3302	ENSG00000135316	0.223483	0.000192591	0.00115671	0.820213	up	SYNCRIP
	3303	ENSG00000174371	0.276879	0.000193387	0.00116114	1.00791	up	EXO1
	3304	ENSG00000108091	0.357732	0.00019384	0.00116351	1.281	up	CCDC6
	3306	ENSG00000135945	0.462709	0.000194375	0.00116637	1.61657	up	REV1
	3308	ENSG00000074590	0.52954	0.000194601	0.00116702	1.8109	up	NUAK1
	3310	ENSG00000110435	0.149874	0.000195727	0.00117306	0.554449	up	PDHX
	3311	ENSG00000157741	0.63503	0.0001963	0.00117596	2.09346	up	UBN2
	3312	ENSG00000154429	0.388319	0.000197017	0.00117972	1.3792	up	CCSAP
	3314	ENSG00000137073	0.24448	0.000198477	0.00118811	0.893112	up	UBAP2
	3317	ENSG00000185947	0.482819	0.000200238	0.00119793	1.67742	up	ZNF267
	3318	ENSG00000119778	0.4492	0.000201388	0.00120372	1.56801	up	ATAD2B
	3321	ENSG00000121931	0.433119	0.000202809	0.0012114	1.51737	up	LRIF1
	3322	ENSG00000117114	0.338549	0.000203611	0.00121553	1.21401	up	ADGRL2
	3324	ENSG00000178951	0.456635	0.000203789	0.00121623	1.58732	up	ZBTB7A
	3325	ENSG00000113594	0.494763	0.000204538	0.00121997	1.69685	up	LIFR
	3327	ENSG00000144161	0.273441	0.000205086	0.00122287	0.99213	up	ZC3H8
	3328	ENSG00000138735	0.449532	0.000206361	0.00122971	1.56889	up	PDE5A
	3329	ENSG00000163596	0.664288	0.000206419	0.00122971	2.17483	up	ICA1L
	3330	ENSG00000009307	0.220026	0.000207222	0.00123412	0.804008	up	CSDE1
	3331	ENSG00000116641	0.50591	0.00020856	0.00124172	1.735	up	DOCK7
	3332	ENSG00000149658	0.296228	0.000208768	0.00124258	1.06809	up	YTHDF1
	3333	ENSG00000165097	0.405342	0.000208988	0.00124352	1.42603	up	KDM1B
	3334	ENSG00000070061	0.267208	0.000210442	0.00125179	0.968473	up	ELP1
	3339	ENSG00000160208	0.258055	0.000211347	0.0012568	0.936368	up	RRP1B
	3340	ENSG00000167522	0.215563	0.000215641	0.00128041	0.785815	up	ANKRD11
	3341	ENSG00000173852	0.343305	0.000215882	0.00128146	1.22276	up	DPY19L1
	3343	ENSG00000117650	0.259664	0.000216408	0.0012842	0.940404	up	NEK2
	3344	ENSG00000230002	0.518822	0.000216973	0.00128678	1.7652	up	ALMS1-IT1
	3345	ENSG00000149554	0.270985	0.00021942	0.00130091	0.978591	up	CHEK1
	3347	ENSG00000215421	0.842786	0.000219813	0.00130284	2.52273	up	ZNF407
	3350	ENSG00000213160	0.271938	0.000220948	0.00130879	0.981297	up	KLHL23
	3351	ENSG00000107938	0.487484	0.000226653	0.00134098	1.66059	up	EDRF1
	3354	ENSG00000152284	0.331252	0.000226611	0.00134098	1.17957	up	TCF7L1
	3355	ENSG00000139496	0.384239	0.000229156	0.00135458	1.35381	up	NUP58
	3356	ENSG00000289250	1.61671	0.000230618	0.00136281	3.2206	up	NA
	3357	ENSG00000117597	0.343768	0.000231725	0.00136895	1.22065	up	UTP25
	3358	ENSG00000173930	0.726802	0.000232179	0.00137122	2.41553	up	SLCO4C1
	3362	ENSG00000148737	0.341436	0.000232249	0.00137123	1.20711	up	TCF7L2
	3363	ENSG00000119772	0.277633	0.000236532	0.00139485	0.996259	up	DNMT3A
	3364	ENSG00000171016	0.500666	0.000237055	0.00139752	1.70979	up	PYGO1
	3365	ENSG00000100796	0.257747	0.000238432	0.00140522	0.927554	up	PPP4R3A
	3371	ENSG00000116199	0.389449	0.000240124	0.00141435	1.36534	up	FAM20B
	3372	ENSG00000159086	0.438516	0.000246156	0.00144773	1.51488	up	PAXBP1
	3376	ENSG00000065457	0.363723	0.000246268	0.00144796	1.28081	up	ADAT1
	3381	ENSG00000157193	0.4253	0.000248352	0.00145848	1.47215	up	LRP8
	3384	ENSG00000130725	0.204832	0.00025352	0.00148662	0.739426	up	UBE2M
	3385	ENSG00000166326	0.359685	0.000257546	0.0015089	1.26218	up	TRIM44
	3386	ENSG00000165588	0.143581	0.000257904	0.00151055	0.521104	up	OTX2
	3387	ENSG00000183049	0.290015	0.000258493	0.00151355	1.03151	up	CAMK1D
	3388	ENSG00000112200	0.323627	0.000258867	0.00151529	1.14481	up	ZNF451
	3389	ENSG00000137571	0.367349	0.000259341	0.00151762	1.28593	up	SLCO5A1
	3392	ENSG00000127616	0.214846	0.000260924	0.00152598	0.773002	up	SMARCA4
	3395	ENSG00000235961	0.282902	0.000261644	0.00152929	1.00584	up	PNMA6A
	3398	ENSG00000157106	0.432693	0.000263237	0.00153724	1.49063	up	SMG1
	3399	ENSG00000164880	0.293628	0.00026536	0.00154827	1.04131	up	INTS1
	3402	ENSG00000178445	0.442519	0.000268028	0.00156338	1.46814	up	GLDC
	3403	ENSG00000110422	0.410027	0.000270809	0.00157791	1.41511	up	HIPK3
	3404	ENSG00000186193	0.338859	0.000270837	0.00157791	1.19079	up	SAPCD2
	3407	ENSG00000150893	0.602557	0.000270973	0.00157823	1.95893	up	FREM2
	3408	ENSG00000080503	0.361281	0.000272863	0.00158785	1.25931	up	SMARCA2
	3409	ENSG00000116062	0.286843	0.000272961	0.00158795	1.01764	up	MSH6
	3410	ENSG00000201822	1.29882	0.000275078	0.00159979	3.2516	up	RNA5SP149
	3411	ENSG00000167969	0.266174	0.0002756	0.00160236	0.94646	up	ECI1
	3412	ENSG00000104998	0.394816	0.000277345	0.00161111	1.36815	up	IL27RA
	3413	ENSG00000138434	0.36479	0.00027735	0.00161111	1.2732	up	ITPRID2
	3415	ENSG00000261351	0.459675	0.000277217	0.00161111	1.56518	up	NA
	3416	ENSG00000060138	0.198765	0.000278967	0.00161908	0.713317	up	YBX3
	3418	ENSG00000152133	0.434587	0.000278914	0.00161908	1.49127	up	GPATCH11
	3419	ENSG00000173744	0.373827	0.000281803	0.00163459	1.29972	up	AGFG1
	3421	ENSG00000273247	0.613851	0.000284159	0.00164777	2.00457	up	NA
	3422	ENSG00000146918	0.234442	0.000285718	0.00165584	0.835703	up	NCAPG2
	3425	ENSG00000136040	0.550697	0.000286278	0.00165861	1.80556	up	PLXNC1
	3427	ENSG00000146676	0.288789	0.000288607	0.00167064	1.02051	up	PURB
	3429	ENSG00000175054	0.509711	0.000290346	0.00167972	1.70819	up	ATR
	3433	ENSG00000187605	0.463221	0.000291212	0.00168375	1.57164	up	TET3
	3435	ENSG00000141279	0.299755	0.000295184	0.00170515	1.05504	up	NPEPPS
	3437	ENSG00000182050	0.785549	0.00029932	0.0017276	2.50473	up	MGAT4C
	3438	ENSG00000128512	0.652815	0.000300522	0.00173353	2.06591	up	DOCK4
	3440	ENSG00000140262	0.405432	0.000301125	0.0017365	1.39322	up	TCF12
	3441	ENSG00000147027	0.438801	0.000302498	0.00174341	1.49508	up	TMEM47
	3442	ENSG00000138185	0.592638	0.00030288	0.0017451	1.94254	up	ENTPD1
	3443	ENSG00000130449	0.651075	0.000303669	0.00174864	2.07204	up	ZSWIM6
	3444	ENSG00000152558	0.192496	0.000303582	0.00174864	0.687337	up	TMEM123
	3449	ENSG00000150907	0.504876	0.00030379	0.00174882	1.6688	up	FOXO1
	3451	ENSG00000181090	0.258071	0.000307891	0.00176986	0.911523	up	EHMT1
	3453	ENSG00000168807	0.367325	0.000308789	0.0017738	1.27048	up	SNTB2
	3454	ENSG00000103502	0.221588	0.00030928	0.00177579	0.786611	up	CDIPT
	3460	ENSG00000280623	0.467011	0.00030951	0.00177659	1.60397	up	NA
	3461	ENSG00000288945	1.89285	0.000315083	0.00180544	3.69895	up	NA
	3463	ENSG00000171488	0.424057	0.000316205	0.00181135	1.44335	up	LRRC8C
	3466	ENSG00000064313	0.338968	0.000317813	0.00181857	1.17669	up	TAF2
	3467	ENSG00000175066	0.386362	0.000318126	0.00181973	1.32856	up	GK5
	3469	ENSG00000120733	0.397659	0.000318241	0.00181986	1.36178	up	KDM3B
	3470	ENSG00000155008	0.373348	0.000320127	0.00182959	1.28648	up	APOOL
	3475	ENSG00000109572	0.370857	0.000320229	0.00182964	1.27883	up	CLCN3
	3481	ENSG00000010322	0.276305	0.000324109	0.00184915	0.968745	up	NISCH
	3482	ENSG00000107651	0.294802	0.000332757	0.00189521	1.02857	up	SEC23IP
	3483	ENSG00000154240	0.560996	0.00033445	0.00190431	1.8273	up	CEP112
	3485	ENSG00000075218	0.321582	0.000336437	0.0019146	1.1162	up	GTSE1
	3486	ENSG00000139154	0.323367	0.000337245	0.00191857	1.12258	up	AEBP2
	3487	ENSG00000177034	0.419588	0.000337505	0.0019195	1.4267	up	MTX3
	3489	ENSG00000248347	0.845998	0.000338178	0.00192277	2.46415	up	NA
	3490	ENSG00000064607	0.210994	0.000341859	0.00194259	0.744696	up	SUGP2
	3491	ENSG00000065183	0.299299	0.000342353	0.00194484	1.04213	up	WDR3
	3492	ENSG00000176463	0.379009	0.000346461	0.00196761	1.29029	up	SLCO3A1
	3493	ENSG00000139351	0.814425	0.000346774	0.00196883	2.42633	up	SYCP3
	3496	ENSG00000185115	0.279267	0.000347667	0.00197333	0.974257	up	NSMCE3
	3498	ENSG00000140367	0.275345	0.000348974	0.00197905	0.960418	up	UBE2Q2
	3501	ENSG00000172939	0.343061	0.000353145	0.00200156	1.18135	up	OXSR1
	3504	ENSG00000110651	0.235199	0.000357914	0.00202685	0.824685	up	CD81
	3505	ENSG00000137177	0.462664	0.000359206	0.00203243	1.54257	up	KIF13A
	3506	ENSG00000140525	0.165633	0.000359341	0.00203261	0.585825	up	FANCI
	3507	ENSG00000108061	0.232624	0.000360585	0.00203901	0.816985	up	SHOC2
	3508	ENSG00000143476	0.240401	0.000360679	0.00203901	0.842275	up	DTL
	3512	ENSG00000160218	0.587505	0.000361042	0.00203965	1.87716	up	TRAPPC10
	3514	ENSG00000155111	0.450117	0.000364551	0.00205797	1.50778	up	CDK19
	3516	ENSG00000170606	0.24951	0.00036624	0.00206633	0.871898	up	HSPA4
	3518	ENSG00000108395	0.356411	0.000367153	0.00206971	1.22011	up	TRIM37
	3519	ENSG00000140265	0.321917	0.000368166	0.00207483	1.10934	up	ZSCAN29
	3520	ENSG00000197016	0.657245	0.000369701	0.00208289	2.06811	up	ZNF470
	3527	ENSG00000171208	0.326605	0.000370423	0.00208636	1.12484	up	NETO2
	3528	ENSG00000164105	0.277152	0.000381207	0.00214285	0.95913	up	SAP30
	3529	ENSG00000137825	0.376747	0.000381779	0.00214545	1.27751	up	ITPKA
	3530	ENSG00000101126	0.256627	0.000382195	0.00214718	0.892814	up	ADNP
	3531	ENSG00000162636	0.629456	0.0003825	0.00214829	1.99463	up	EEIG2
	3532	ENSG00000099810	0.344009	0.000382908	0.00214996	1.17796	up	MTAP
	3533	ENSG00000100285	0.326193	0.000384595	0.00215883	1.1198	up	NEFH
	3534	ENSG00000152217	0.501205	0.000385311	0.00216224	1.64877	up	SETBP1
	3537	ENSG00000073350	0.354012	0.000385742	0.00216357	1.20845	up	LLGL2
	3538	ENSG00000089737	0.185847	0.000389015	0.00218015	0.652142	up	DDX24
	3539	ENSG00000188786	0.446465	0.000389053	0.00218015	1.49221	up	MTF1
	3544	ENSG00000095139	0.249258	0.000389778	0.0021836	0.866883	up	ARCN1
	3545	ENSG00000189057	0.619818	0.000395615	0.00221254	1.96471	up	FAM111B
	3547	ENSG00000244462	0.225543	0.000395517	0.00221254	0.786473	up	RBM12
	3548	ENSG00000123737	0.180942	0.000396965	0.00221884	0.634292	up	EXOSC9
	3550	ENSG00000164631	0.415268	0.000397831	0.00222305	1.39317	up	ZNF12
	3554	ENSG00000095203	0.37693	0.00039856	0.00222588	1.26996	up	EPB41L4B
	3555	ENSG00000146085	0.317373	0.000403902	0.00225266	1.08796	up	MMUT
	3558	ENSG00000282826	0.297443	0.000403925	0.00225266	1.02362	up	FRG1CP
	3561	ENSG00000235552	0.395091	0.000407144	0.0022687	1.333	up	RPL6P27
	3562	ENSG00000185900	0.315892	0.000412743	0.00229796	1.08106	up	POMK
	3567	ENSG00000273284	1.30879	0.000413219	0.00229997	3.18739	up	NA
	3572	ENSG00000159658	0.38572	0.000420933	0.00233962	1.30005	up	EFCAB14
	3574	ENSG00000146278	0.28058	0.000426864	0.00236926	0.964578	up	PNRC1
	3578	ENSG00000118816	0.212623	0.000428657	0.00237788	0.738205	up	CCNI
	3580	ENSG00000072501	0.332102	0.000432594	0.00239637	1.12902	up	SMC1A
	3582	ENSG00000122033	0.356934	0.00043349	0.00239963	1.20778	up	MTIF3
	3584	ENSG00000225465	0.683717	0.000433545	0.00239963	2.10203	up	NA
	3585	ENSG00000137203	0.463243	0.000434797	0.00240521	1.52783	up	TFAP2A
	3586	ENSG00000167393	0.248302	0.000435216	0.00240686	0.856059	up	PPP2R3B
	3588	ENSG00000152492	0.218814	0.000435436	0.00240741	0.758002	up	CCDC50
	3590	ENSG00000221914	0.220748	0.000441954	0.00244208	0.763796	up	PPP2R2A
	3592	ENSG00000166439	0.80256	0.000443641	0.00245003	2.30188	up	RNF169
	3594	ENSG00000196367	0.235729	0.000447202	0.00246833	0.813513	up	TRRAP
	3595	ENSG00000070882	0.446505	0.000448682	0.00247461	1.47249	up	OSBPL3
	3596	ENSG00000092020	0.181045	0.000448716	0.00247461	0.628717	up	PPP2R3C
	3597	ENSG00000104356	0.363703	0.000449053	0.00247579	1.22561	up	POP1
	3601	ENSG00000078687	0.447368	0.000449632	0.00247829	1.46975	up	TNRC6C
	3602	ENSG00000164983	0.311709	0.0004532	0.00249518	1.05998	up	TMEM65
	3603	ENSG00000091986	0.498397	0.000455894	0.00250932	1.62881	up	CCDC80
	3604	ENSG00000151422	0.595541	0.000456319	0.00251096	1.88061	up	FER
	3606	ENSG00000108406	0.290342	0.000457936	0.00251916	0.990216	up	DHX40
	3608	ENSG00000077147	0.287742	0.000458886	0.00252298	0.98246	up	TM9SF3
	3609	ENSG00000254759	0.622241	0.000460096	0.00252823	1.97147	up	NAP1L1P1
	3612	ENSG00000138802	0.352658	0.000461041	0.00253273	1.1886	up	SEC24B
	3614	ENSG00000248360	0.998009	0.00046362	0.00254483	2.793	up	LINC00504
	3617	ENSG00000204389	0.344064	0.000463947	0.00254516	1.16194	up	HSPA1A
	3618	ENSG00000055044	0.246332	0.00046746	0.00256231	0.845599	up	NOP58
	3620	ENSG00000243943	0.355022	0.000468313	0.00256627	1.19276	up	ZNF512
	3621	ENSG00000196109	0.71416	0.000473208	0.00259166	2.15923	up	ZNF676
	3622	ENSG00000058063	0.403382	0.00047397	0.00259441	1.33979	up	ATP11B
	3626	ENSG00000106799	0.334052	0.000473899	0.00259441	1.12747	up	TGFBR1
	3627	ENSG00000153157	0.701779	0.000481792	0.00263431	2.09253	up	SYCP2L
	3628	ENSG00000188419	0.440775	0.00048277	0.00263893	1.44935	up	CHM
	3631	ENSG00000176393	0.264281	0.000483615	0.00264245	0.902382	up	RNPEP
	3633	ENSG00000108100	0.329752	0.000485541	0.00265115	1.11137	up	CCNY
	3634	ENSG00000128607	0.395218	0.00048827	0.00266458	1.3129	up	KLHDC10
	3639	ENSG00000133131	0.438784	0.000489098	0.00266837	1.43932	up	MORC4
	3644	ENSG00000260916	0.325836	0.00049157	0.00267875	1.09489	up	CCPG1
	3645	ENSG00000120254	0.278547	0.000496068	0.00269897	0.946302	up	MTHFD1L
	3647	ENSG00000125962	0.416736	0.000497145	0.00270408	1.37152	up	ARMCX5
	3651	ENSG00000067704	0.330942	0.00050049	0.00272004	1.1132	up	IARS2
	3652	ENSG00000154310	0.475545	0.000504294	0.00273846	1.54385	up	TNIK
	3654	ENSG00000116574	0.441381	0.000505574	0.00274466	1.44895	up	RHOU
	3655	ENSG00000132305	0.182308	0.000508082	0.00275677	0.627119	up	IMMT
	3657	ENSG00000076382	0.233513	0.000509966	0.00276624	0.797671	up	SPAG5
	3658	ENSG00000271122	0.368907	0.000513037	0.00278137	1.22893	up	HERPUD2-AS1
	3662	ENSG00000197563	0.410012	0.000516024	0.0027968	1.35214	up	PIGN
	3663	ENSG00000196653	0.505743	0.000517467	0.00280162	1.62303	up	ZNF502
	3664	ENSG00000144746	0.165836	0.000519756	0.00281318	0.570649	up	ARL6IP5
	3665	ENSG00000136574	0.336153	0.000520708	0.00281756	1.12663	up	GATA4
	3671	ENSG00000198961	0.335474	0.000522612	0.00282709	1.12308	up	PJA2
	3672	ENSG00000224094	0.543918	0.000532261	0.00287458	1.72807	up	NA
	3673	ENSG00000135999	0.276699	0.000532419	0.00287466	0.935819	up	EPC2
	3675	ENSG00000173575	0.303936	0.000532628	0.002875	1.02257	up	CHD2
	3677	ENSG00000038382	0.503966	0.000536544	0.00289456	1.60568	up	TRIO
	3679	ENSG00000120526	0.28625	0.000537501	0.00289815	0.966046	up	NUDCD1
	3682	ENSG00000136098	0.340586	0.000539383	0.00290671	1.13555	up	NEK3
	3684	ENSG00000285458	0.454669	0.000541855	0.00291766	1.50892	up	C4orf36
	3686	ENSG00000114030	0.251677	0.000542405	0.00291904	0.853562	up	KPNA1
	3687	ENSG00000138162	0.311181	0.000543908	0.00292553	1.03997	up	TACC2
	3688	ENSG00000130935	0.184524	0.000544746	0.00292845	0.63114	up	NOL11
	3689	ENSG00000171105	0.331275	0.000544641	0.00292845	1.1049	up	INSR
	3692	ENSG00000156273	0.615157	0.000546306	0.00293525	1.9009	up	BACH1
	3693	ENSG00000100603	0.237722	0.000549648	0.0029516	0.80687	up	SNW1
	3697	ENSG00000141428	0.2524	0.000550707	0.00295649	0.854766	up	C18orf21
	3698	ENSG00000160336	0.39999	0.000558874	0.00299709	1.31864	up	ZNF761
	3699	ENSG00000163249	0.634779	0.000560795	0.00300658	1.94815	up	CCNYL1
	3701	ENSG00000254087	0.328309	0.000561505	0.00300957	1.09447	up	LYN
	3703	ENSG00000082068	0.277108	0.000565052	0.00302695	0.932337	up	WDR70
	3704	ENSG00000164236	0.592999	0.000566465	0.00303288	1.82885	up	ANKRD33B
	3705	ENSG00000070269	0.458139	0.000566814	0.00303392	1.47957	up	TMEM260
	3709	ENSG00000251602	0.424796	0.000568689	0.00304314	1.39047	up	MTA1-DT
	3710	ENSG00000015133	0.283029	0.000576816	0.0030833	0.949234	up	CCDC88C
	3711	ENSG00000160049	0.299913	0.000577116	0.00308407	1.0041	up	DFFA
	3712	ENSG00000134709	0.616077	0.000577914	0.0030875	1.89907	up	HOOK1
	3713	ENSG00000163655	0.165774	0.000580567	0.0031	0.565409	up	GMPS
	3714	ENSG00000287530	0.315649	0.000580478	0.0031	1.0586	up	NA
	3715	ENSG00000119004	0.462535	0.000581063	0.00310182	1.492	up	CYP20A1
	3717	ENSG00000197056	0.510671	0.000582369	0.00310796	1.62745	up	ZMYM1
	3718	ENSG00000186432	0.314493	0.000583972	0.00311483	1.04859	up	KPNA4
	3721	ENSG00000157985	0.339107	0.00058482	0.00311852	1.12382	up	AGAP1
	3722	ENSG00000198947	0.369299	0.000592723	0.00315811	1.21537	up	DMD
	3723	ENSG00000085982	0.433529	0.00059346	0.00316055	1.40209	up	USP40
	3724	ENSG00000138346	0.32999	0.000593499	0.00316055	1.09684	up	DNA2
	3726	ENSG00000289094	1.16163	0.000593672	0.00316062	3.00821	up	NA
	3728	ENSG00000155380	0.306445	0.000596353	0.00317319	1.02128	up	SLC16A1
	3729	ENSG00000162434	0.372172	0.000599403	0.00318771	1.22281	up	JAK1
	3730	ENSG00000197050	0.449956	0.000599933	0.00318967	1.44677	up	ZNF420
	3731	ENSG00000028310	0.258853	0.000600309	0.00319081	0.868931	up	BRD9
	3734	ENSG00000163728	0.642801	0.000604738	0.00321263	1.95591	up	TTC14
	3735	ENSG00000172292	0.451876	0.00060672	0.00322143	1.45383	up	CERS6
	3741	ENSG00000121058	0.336636	0.000612211	0.00324972	1.1139	up	COIL
	3743	ENSG00000091073	0.444173	0.000627234	0.00332412	1.4254	up	DTX2
	3745	ENSG00000124486	0.290689	0.000627889	0.00332581	0.967847	up	USP9X
	3750	ENSG00000112984	0.254272	0.000636916	0.00337093	0.85074	up	KIF20A
	3751	ENSG00000218891	0.509632	0.000647365	0.00342258	1.59228	up	ZNF579
	3752	ENSG00000151276	0.384838	0.000649908	0.00343511	1.2518	up	MAGI1
	3754	ENSG00000101421	0.266422	0.000650488	0.00343725	0.886921	up	CHMP4B
	3759	ENSG00000076984	0.428626	0.000651209	0.00343923	1.38183	up	MAP2K7
	3761	ENSG00000136021	0.397741	0.000656587	0.00346302	1.29003	up	SCYL2
	3763	ENSG00000241058	0.295952	0.000663467	0.00349745	0.979396	up	NSUN6
	3765	ENSG00000183850	0.404148	0.000671844	0.00353972	1.31019	up	ZNF730
	3768	ENSG00000147679	0.203474	0.000673233	0.00354515	0.683253	up	UTP23
	3771	ENSG00000125285	0.303118	0.000677103	0.0035627	0.999886	up	SOX21
	3772	ENSG00000023909	0.374338	0.000680077	0.0035755	1.21784	up	GCLM
	3773	ENSG00000136044	0.298271	0.000681374	0.00358137	0.984633	up	APPL2
	3774	ENSG00000101333	0.542499	0.000681837	0.00358285	1.69023	up	PLCB4
	3776	ENSG00000033030	0.248187	0.000682807	0.003587	0.826456	up	ZCCHC8
	3778	ENSG00000089234	0.252724	0.000688102	0.0036129	0.840924	up	BRAP
	3779	ENSG00000158234	0.193123	0.000692925	0.0036363	0.647946	up	FAIM
	3781	ENSG00000185760	0.415192	0.000694219	0.00364212	1.33563	up	KCNQ5
	3782	ENSG00000164031	0.459599	0.000697238	0.00365603	1.46194	up	DNAJB14
	3785	ENSG00000083520	0.358029	0.00069817	0.00365898	1.1664	up	DIS3
	3786	ENSG00000231752	0.933871	0.000699567	0.00366436	2.472	up	EMBP1
	3787	ENSG00000116903	0.743789	0.000700075	0.00366606	2.15087	up	EXOC8
	3788	ENSG00000100941	0.223787	0.000701995	0.00367417	0.746588	up	PNN
	3789	ENSG00000164609	0.278179	0.000701988	0.00367417	0.920039	up	SLU7
	3791	ENSG00000139117	0.610687	0.000704792	0.00368783	1.85078	up	CPNE8
	3793	ENSG00000147316	0.362107	0.000705995	0.00369218	1.17751	up	MCPH1
	3796	ENSG00000178695	0.40929	0.000707344	0.00369729	1.31372	up	KCTD12
	3797	ENSG00000198826	0.270827	0.000713874	0.00372847	0.895601	up	ARHGAP11A
	3798	ENSG00000186684	0.443435	0.000716998	0.0037438	1.42277	up	CYP27C1
	3799	ENSG00000271992	0.731305	0.000718691	0.00375165	2.11132	up	NA
	3800	ENSG00000156304	0.299323	0.000719876	0.00375684	0.984247	up	SCAF4
	3802	ENSG00000132932	0.445584	0.000722487	0.00376896	1.40979	up	ATP8A2
	3804	ENSG00000204217	0.472829	0.000722957	0.00376896	1.49285	up	BMPR2
	3805	ENSG00000167766	0.395501	0.000725768	0.00378262	1.27718	up	ZNF83
	3809	ENSG00000177731	0.306982	0.000726195	0.00378385	1.00787	up	FLII
	3810	ENSG00000168264	0.271182	0.000731416	0.00380705	0.894113	up	IRF2BP2
	3811	ENSG00000172888	0.437514	0.000738321	0.00384198	1.39358	up	ZNF621
	3812	ENSG00000169084	0.264	0.000740262	0.00385107	0.871264	up	DHRSX
	3813	ENSG00000289194	0.391736	0.000741083	0.00385433	1.25814	up	NA
	3814	ENSG00000106086	0.491942	0.000742894	0.00386274	1.54336	up	PLEKHA8
	3817	ENSG00000105486	0.226847	0.000743842	0.00386665	0.75259	up	LIG1
	3819	ENSG00000070814	0.243024	0.000746751	0.00387872	0.804354	up	TCOF1
	3821	ENSG00000112983	0.295894	0.000752241	0.00390519	0.9697	up	BRD8
	3823	ENSG00000068137	0.368639	0.000753349	0.0039089	1.1877	up	PLEKHH3
	3824	ENSG00000169891	0.70688	0.000759999	0.00394134	2.00975	up	REPS2
	3826	ENSG00000265992	0.280661	0.00076146	0.00394788	0.919811	up	ESRG
	3830	ENSG00000110768	0.2227	0.000773468	0.00400804	0.737338	up	GTF2H1
	3831	ENSG00000257923	0.330875	0.000778347	0.00402912	1.07371	up	CUX1
	3832	ENSG00000144152	0.83928	0.000780988	0.00404173	2.36234	up	FBLN7
	3834	ENSG00000134294	0.250133	0.000783944	0.00405385	0.823767	up	SLC38A2
	3841	ENSG00000183808	0.344134	0.000802942	0.00414509	1.1119	up	RBM12B
	3842	ENSG00000105939	0.268848	0.00080617	0.00416011	0.881086	up	ZC3HAV1
	3844	ENSG00000160229	0.742358	0.000811471	0.00418528	2.15753	up	ZNF66
	3847	ENSG00000110514	0.312955	0.000814293	0.00419656	1.01451	up	MADD
	3849	ENSG00000083896	0.195564	0.000818014	0.00421265	0.64657	up	YTHDC1
	3850	ENSG00000257103	0.167001	0.000818053	0.00421265	0.55404	up	LSM14A
	3851	ENSG00000100731	0.308651	0.000819566	0.00421854	1.00263	up	PCNX1
	3853	ENSG00000083799	0.493897	0.00081988	0.00421877	1.53236	up	CYLD
	3856	ENSG00000172354	0.200565	0.000828293	0.00425875	0.661982	up	GNB2
	3859	ENSG00000170265	0.331471	0.000829635	0.00426233	1.06859	up	ZNF282
	3860	ENSG00000136891	0.342117	0.000830706	0.00426673	1.10261	up	TEX10
	3861	ENSG00000178075	0.499731	0.000831003	0.00426715	1.54773	up	GRAMD1C
	3863	ENSG00000108312	0.282011	0.000839657	0.00430712	0.91806	up	UBTF
	3864	ENSG00000168116	0.306503	0.000839423	0.00430712	0.994262	up	KIAA1586
	3865	ENSG00000196739	0.384572	0.000839592	0.00430712	1.22723	up	COL27A1
	3867	ENSG00000036257	0.4179	0.000844797	0.00433125	1.32293	up	CUL3
	3869	ENSG00000111880	0.378312	0.000849322	0.0043522	1.2069	up	RNGTT
	3872	ENSG00000204569	0.252409	0.000858869	0.00439771	0.824087	up	PPP1R10
	3873	ENSG00000133704	0.418544	0.000863415	0.00441984	1.32161	up	IPO8
	3875	ENSG00000168268	0.173043	0.000866813	0.00443495	0.570931	up	NT5DC2
	3876	ENSG00000015171	0.487038	0.000867356	0.00443658	1.50781	up	ZMYND11
	3879	ENSG00000069869	0.580738	0.000873725	0.0044657	1.74475	up	NEDD4
	3881	ENSG00000151846	1.77538	0.000880023	0.00449558	3.30619	up	PABPC3
	3883	ENSG00000112118	0.178003	0.000884529	0.00451627	0.585885	up	MCM3
	3884	ENSG00000138002	0.403892	0.000885039	0.00451771	1.27441	up	IFT172
	3892	ENSG00000235651	1.22248	0.000899957	0.00458441	3.19876	up	G3BP1P1
	3893	ENSG00000146373	0.788858	0.000900822	0.00458647	2.20638	up	RNF217
	3894	ENSG00000150760	0.423784	0.000900703	0.00458647	1.323	up	DOCK1
	3896	ENSG00000278530	0.900799	0.000902739	0.00459387	2.51147	up	CHMP1B2P
	3897	ENSG00000102763	0.453415	0.000904904	0.0046037	1.4133	up	VWA8
	3898	ENSG00000123612	0.941483	0.000907562	0.00461604	2.4765	up	ACVR1C
	3899	ENSG00000087269	0.30649	0.000912189	0.00463748	0.987229	up	NOP14
	3900	ENSG00000165730	0.54926	0.000912246	0.00463748	1.67384	up	STOX1
	3901	ENSG00000174891	0.167369	0.000915969	0.00465522	0.550115	up	RSRC1
	3906	ENSG00000152332	0.517791	0.000927612	0.00470836	1.58296	up	UHMK1
	3909	ENSG00000059588	0.416104	0.000930049	0.0047171	1.3081	up	TARBP1
	3912	ENSG00000131023	0.430183	0.000935524	0.00474123	1.34663	up	LATS1
	3913	ENSG00000120008	0.368297	0.000936554	0.00474524	1.1645	up	WDR11
	3916	ENSG00000087095	0.667144	0.000942111	0.00476974	1.93382	up	NLK
	3917	ENSG00000079102	0.490413	0.000943852	0.00477733	1.49048	up	RUNX1T1
	3919	ENSG00000139990	0.468314	0.000951975	0.00481599	1.44636	up	DCAF5
	3921	ENSG00000198429	0.840862	0.000957346	0.00484069	2.31722	up	ZNF69
	3923	ENSG00000198718	0.515656	0.000958221	0.00484333	1.56614	up	TOGARAM1
	3931	ENSG00000143643	0.41081	0.000973269	0.00490868	1.28462	up	TTC13
	3932	ENSG00000174442	0.275899	0.000976971	0.0049261	0.88837	up	ZWILCH
	3933	ENSG00000081913	0.557683	0.000977221	0.00492611	1.66482	up	PHLPP1
	3935	ENSG00000181163	0.177142	0.000985823	0.00496695	0.577874	up	NPM1
	3938	ENSG00000147459	0.506846	0.000993374	0.00500118	1.54358	up	DOCK5
	3939	ENSG00000131944	0.411231	0.000994586	0.00500601	1.28715	up	FAAP24
	3940	ENSG00000113971	0.6003	0.000996983	0.005016	1.77494	up	NPHP3
	3944	ENSG00000116754	0.187156	0.00100087	0.00503124	0.609076	up	SRSF11
	3945	ENSG00000118257	0.360487	0.00100193	0.00503528	1.13835	up	NRP2
	3946	ENSG00000055163	0.254218	0.00100308	0.00503978	0.818591	up	CYFIP2
	3947	ENSG00000116191	0.345189	0.00101251	0.00508463	1.09431	up	RALGPS2
	3950	ENSG00000143126	0.362885	0.00102498	0.00514464	1.14251	up	CELSR2
	3951	ENSG00000155760	0.36228	0.00102679	0.00515108	1.13922	up	FZD7
	3952	ENSG00000260317	1.11236	0.00102676	0.00515108	2.92554	up	NA
	3954	ENSG00000080007	0.36327	0.00102907	0.0051599	1.13672	up	DDX43
	3956	ENSG00000172244	0.303636	0.00103141	0.00517	0.968888	up	C5orf34
	3957	ENSG00000115109	0.380844	0.00103342	0.00517782	1.19425	up	EPB41L5
	3961	ENSG00000086232	0.199273	0.00104002	0.00520562	0.645149	up	EIF2AK1
	3963	ENSG00000102241	0.298838	0.00104723	0.00523905	0.95201	up	HTATSF1
	3966	ENSG00000096872	0.269233	0.0010517	0.00525743	0.859093	up	IFT74
	3968	ENSG00000124228	0.215529	0.00106658	0.0053278	0.694879	up	DDX27
	3969	ENSG00000137845	0.338082	0.00106654	0.0053278	1.06687	up	ADAM10
	3970	ENSG00000066697	0.285069	0.00106933	0.00534019	0.909194	up	MSANTD3
	3973	ENSG00000163624	0.365354	0.00107216	0.00534801	1.1437	up	CDS1
	3975	ENSG00000184743	0.172423	0.00107213	0.00534801	0.558652	up	ATL3
	3976	ENSG00000107959	0.249438	0.00107738	0.00537226	0.799418	up	PITRM1
	3979	ENSG00000101144	0.348868	0.00108502	0.00540629	1.09771	up	BMP7
	3981	ENSG00000110274	0.322865	0.00108995	0.00542812	1.02006	up	CEP164
	3982	ENSG00000076242	0.197592	0.00109085	0.00543124	0.637317	up	MLH1
	3983	ENSG00000289357	0.486838	0.00109642	0.00545759	1.47378	up	NA
	3989	ENSG00000140450	0.51925	0.00111381	0.00553582	1.55806	up	ARRDC4
	3990	ENSG00000197619	0.582508	0.00111445	0.00553762	1.72556	up	ZNF615
	3993	ENSG00000245573	0.54282	0.00111977	0.00555986	1.62289	up	BDNF-AS
	3995	ENSG00000147174	1.94727	0.00112067	0.00556216	2.50427	up	GCNA
	3996	ENSG00000157404	0.519181	0.00112135	0.00556216	1.5538	up	KIT
	3998	ENSG00000197763	0.385354	0.0011243	0.00557539	1.19877	up	TXNRD3
	4001	ENSG00000198146	0.376537	0.00113135	0.00560612	1.17389	up	ZNF770
	4002	ENSG00000123836	0.507625	0.0011384	0.00563823	1.53031	up	PFKFB2
	4003	ENSG00000164294	0.261836	0.00113829	0.00563823	0.834222	up	GPX8
	4004	ENSG00000165891	0.40568	0.00113973	0.00564342	1.25673	up	E2F7
	4007	ENSG00000099139	0.640643	0.00114677	0.00567405	1.84171	up	PCSK5
	4011	ENSG00000204138	0.308509	0.00115549	0.00571005	0.973507	up	PHACTR4
	4012	ENSG00000237854	0.301159	0.00115534	0.00571005	0.951631	up	NA
	4013	ENSG00000213096	0.606506	0.00115702	0.0057162	1.77075	up	ZNF254
	4015	ENSG00000170011	0.290052	0.00115885	0.0057224	0.918409	up	MYRIP
	4016	ENSG00000136051	0.431608	0.00116197	0.00573633	1.32455	up	WASHC4
	4017	ENSG00000121989	0.372023	0.00116365	0.00574323	1.15796	up	ACVR2A
	4027	ENSG00000151503	0.302616	0.00119033	0.00586033	0.952654	up	NCAPD3
	4028	ENSG00000131263	0.306328	0.00119312	0.00587257	0.963985	up	RLIM
	4030	ENSG00000260032	0.227548	0.00119518	0.00588015	0.725445	up	NORAD
	4031	ENSG00000122729	0.278089	0.00119792	0.00589181	0.878933	up	ACO1
	4033	ENSG00000174579	0.343938	0.00120446	0.00592107	1.0726	up	MSL2
	4036	ENSG00000177707	0.502451	0.00121461	0.00596649	1.50712	up	NECTIN3
	4038	ENSG00000043355	0.431331	0.00121908	0.0059855	1.31564	up	ZIC2
	4039	ENSG00000136643	0.466766	0.00122227	0.00599969	1.41566	up	RPS6KC1
	4040	ENSG00000230383	1.04119	0.00122457	0.0060095	2.57791	up	RPL6P19
	4041	ENSG00000236111	0.476764	0.00122859	0.00602773	1.46363	up	RPL6P1
	4043	ENSG00000142599	0.337469	0.00123195	0.00604121	1.05149	up	RERE
	4044	ENSG00000233757	0.505143	0.00123326	0.00604615	1.50845	up	LOC344065
	4045	ENSG00000198626	0.336694	0.00123579	0.00605706	1.03983	up	RYR2
	4048	ENSG00000070950	0.333847	0.00124781	0.00611104	1.04054	up	RAD18
	4050	ENSG00000011114	0.558462	0.00125255	0.0061316	1.63955	up	BTBD7
	4051	ENSG00000039319	0.525405	0.00125583	0.00614618	1.56273	up	ZFYVE16
	4053	ENSG00000136451	0.301597	0.00125712	0.00614941	0.945368	up	VEZF1
	4054	ENSG00000134897	0.434547	0.00125889	0.00615656	1.32312	up	BIVM
	4055	ENSG00000104299	0.278045	0.00126239	0.00617063	0.875506	up	INTS9
	4058	ENSG00000169679	0.20286	0.00126422	0.00617654	0.645681	up	BUB1
	4059	ENSG00000128881	0.512507	0.00126646	0.00618596	1.52453	up	TTBK2
	4063	ENSG00000115504	0.34806	0.00127771	0.00623476	1.07912	up	EHBP1
	4068	ENSG00000114107	0.254739	0.00128912	0.0062827	0.80325	up	CEP70
	4070	ENSG00000213371	0.717622	0.00129644	0.0063153	2.02006	up	NAP1L1P3
	4071	ENSG00000007264	0.351266	0.00129699	0.00631639	1.08599	up	MATK
	4072	ENSG00000187837	0.309797	0.00129833	0.00632138	0.965958	up	H1-2
	4075	ENSG00000117713	0.270123	0.00130158	0.00633253	0.848487	up	ARID1A
	4076	ENSG00000157625	0.639644	0.00130357	0.00634067	1.82303	up	TAB3
	4077	ENSG00000135679	0.217583	0.00130648	0.00635327	0.689342	up	MDM2
	4080	ENSG00000035403	0.330633	0.00131345	0.00638245	1.02673	up	VCL
	4081	ENSG00000196497	0.511153	0.00131674	0.00639688	1.52087	up	IPO4
	4084	ENSG00000047457	0.504303	0.00132862	0.00644985	1.49923	up	CP
	4086	ENSG00000134602	0.225895	0.0013375	0.0064898	0.713054	up	STK26
	4087	ENSG00000168298	0.421228	0.00133924	0.00649662	1.27768	up	H1-4
	4089	ENSG00000166130	0.343361	0.00134443	0.00651865	1.06131	up	IKBIP
	4090	ENSG00000134569	0.418547	0.0013459	0.00652415	1.27045	up	LRP4
	4094	ENSG00000176022	0.250615	0.00136489	0.00660973	0.78669	up	B3GALT6
	4095	ENSG00000285822	0.436076	0.00137083	0.00663689	1.3161	up	NA
	4096	ENSG00000177084	0.285271	0.00137833	0.00667156	0.889172	up	POLE
[truncated: 7,627 more rows]

## Sheet: 2C L1TD1
L1TD1 combined
KO	dKO
165.88	1
174.416	1
143.933	1
154.868	1
101.93	1
108.55	1
Paired t test of L1TD1 combined
Table Analyzed	L1TD1 combined
Column B	dKO
vs.	vs.
Column A	KO
Paired t test
P value	<0.0001
P value summary	****
Significantly different (P < 0.05)?	Yes
One- or two-tailed P value?	One-tailed
t, df	t=11.46, df=5
Number of pairs	6
How big is the difference?
Mean of differences (B - A)	-140.6
SD of differences	30.05
SEM of differences	12.27
95% confidence interval	-172.1 to -109.1
R squared (partial eta squared)	0.9633
How effective was the pairing?
Correlation coefficient (r)	Vertical line
P value (one tailed)
P value summary
Was the pairing significantly effective?

## Sheet: 2C ARMC1
ARMC1 combined
KO	DKO
53.73	1
32.305	1
54.5989	1
248.646	1
546.838	1
197.32	1
Paired t test of ARMC1 combined
Table Analyzed	ARMC1 combined
Column B	DKO
vs.	vs.
Column A	KO
Paired t test
P value	0.033
P value summary	*
Significantly different (P < 0.05)?	Yes
One- or two-tailed P value?	One-tailed
t, df	t=2.345, df=5
Number of pairs	6
How big is the difference?
Mean of differences (B - A)	-187.9
SD of differences	196.3
SEM of differences	80.12
95% confidence interval	-393.9 to 18.06
R squared (partial eta squared)	0.5238
How effective was the pairing?
Correlation coefficient (r)	Vertical line
P value (one tailed)
P value summary
Was the pairing significantly effective?

## Sheet: 2C YY2
YY2 combined
DNMT1 KO	DNMT1 L1TD1 dKO
8.12624	1
8.76229	1
12.6786	1
6.18876	1
6.83883	1
5.94122	1
Paired t test of YY2 combined
Table Analyzed	YY2 combined
Column B	DNMT1 L1TD1 dKO
vs.	vs.
Column A	DNMT1 KO
Paired t test
P value	0.0005
P value summary	***
Significantly different (P < 0.05)?	Yes
One- or two-tailed P value?	One-tailed
t, df	t=6.940, df=5
Number of pairs	6
How big is the difference?
Mean of differences (B - A)	-7.089
SD of differences	2.502
SEM of differences	1.022
95% confidence interval	-9.715 to -4.463
R squared (partial eta squared)	0.9059
How effective was the pairing?
Correlation coefficient (r)	Vertical line
P value (one tailed)
P value summary
Was the pairing significantly effective?

## Sheet: 2C-GAPHD
GAPDH combined
KO	DKO
1.24654	1
1.99195	1
1.8731	1
1.71338	1
0.387778	1
1.23541	1
Paired t test of GAPDH combined
Table Analyzed	GAPDH combined
Column B	DKO
vs.	vs.
Column A	KO
Paired t test
P value	0.0758
P value summary	ns
Significantly different (P < 0.05)?	No
One- or two-tailed P value?	One-tailed
t, df	t=1.691, df=5
Number of pairs	6
How big is the difference?
Mean of differences (B - A)	-0.408
SD of differences	0.5911
SEM of differences	0.2413
95% confidence interval	-1.028 to 0.2123
R squared (partial eta squared)	0.3637
How effective was the pairing?
Correlation coefficient (r)	Vertical line
P value (one tailed)
P value summary
Was the pairing significantly effective?

## Sheet: 2D
		geneID	log2FoldChange	lfcSE	pvalue	padj	L1	ERV	highlight	type	group
	1	L1PA10	5.61629	1.71647	0.00106791	0.010312	L1PA10		L1PA10	L1	highlight
	3	MER87:ERV1:LTR	3.37179	1.18233	0.004347	0.0290471		MER87:ERV1:LTR	MER87:ERV1:LTR	ERV	highlight
	4	L1PA2	3.25878	0.683708	1.87612609333709e-06	5.11624656264086e-05	L1PA2		L1PA2	L1	highlight
	5	L1PA3	3.16536	0.827213	0.00012996	0.00178309	L1PA3		L1PA3	L1	highlight
	6	LTR60B:ERV1:LTR	3.14426	1.13438	0.0055749	0.0362908		LTR60B:ERV1:LTR	LTR60B:ERV1:LTR	ERV	highlight
	7	LTR9C:ERV1:LTR	3.05604	0.978549	0.00178998	0.0151772		LTR9C:ERV1:LTR	LTR9C:ERV1:LTR	ERV	highlight
	8	ERV3-16A3_LTR:ERVL:LTR	2.91191	0.84875	0.000601756	0.0065997		ERV3-16A3_LTR:ERVL:LTR	ERV3-16A3_LTR:ERVL:LTR	ERV	highlight
	9	L1M3de:L1:LINE	2.84081	0.595437	1.83341270603781e-06	5.11624656264086e-05	L1M3de:L1:LINE		L1M3de:L1:LINE	L1	highlight
	10	MER70-int:ERVL:LTR	2.80687	0.884545	0.00150752	0.013828		MER70-int:ERVL:LTR	MER70-int:ERVL:LTR	ERV	highlight
	11	LTR76:ERV1:LTR	2.49117	0.921446	0.00686042	0.0432635		LTR76:ERV1:LTR	LTR76:ERV1:LTR	ERV	highlight
	12	HERV9NC-int:ERV1:LTR	2.45742	0.637163	0.000114872	0.00160981		HERV9NC-int:ERV1:LTR	HERV9NC-int:ERV1:LTR	ERV	highlight
	13	MLT2A1:ERVL:LTR	2.44705	0.317287	1.23467724742118e-14	2.49157868529594e-12		MLT2A1:ERVL:LTR	MLT2A1:ERVL:LTR	ERV	highlight
	14	L1M3d:L1:LINE	2.01723	0.656314	0.00211506	0.0174926	L1M3d:L1:LINE		L1M3d:L1:LINE	L1	highlight
	15	LTR70:ERV1:LTR	1.93764	0.299681	1.00855722252599e-10	8.48028531273936e-09		LTR70:ERV1:LTR	LTR70:ERV1:LTR	ERV	highlight
	16	L1PA12:L1:LINE	1.73003	0.38019	5.35330670495506e-06	0.000125616	L1PA12:L1:LINE		L1PA12:L1:LINE	L1	highlight
	17	MER11A:ERVK:LTR	1.60976	0.529397	0.00235997	0.0187473		MER11A:ERVK:LTR	MER11A:ERVK:LTR	ERV	highlight
	20	L1PA6:L1:LINE	1.519	0.178954	2.0976133527488e-17	7.05497290974514e-15	L1PA6:L1:LINE		L1PA6:L1:LINE	L1	highlight
	21	MLT1E3:ERVL-MaLR:LTR	1.48192	0.361773	4.19867989673683e-05	0.000694503		MLT1E3:ERVL-MaLR:LTR	MLT1E3:ERVL-MaLR:LTR	ERV	highlight
	22	L1PB1:L1:LINE	1.44286	0.18202	2.24571038409254e-15	5.66480444387344e-13	L1PB1:L1:LINE		L1PB1:L1:LINE	L1	highlight
	23	L1PA2:L1:LINE	1.43734	0.191339	5.82282160461064e-14	7.34403374881517e-12	L1PA2:L1:LINE		L1PA2:L1:LINE	L1	highlight
	25	HAL1ME:L1:LINE	1.40636	0.229771	9.3167740699956e-10	5.87539064789098e-08	HAL1ME:L1:LINE		HAL1ME:L1:LINE	L1	highlight
	26	L1PA11:L1:LINE	1.38989	0.273275	3.65579714049678e-07	1.30524127967207e-05	L1PA11:L1:LINE		L1PA11:L1:LINE	L1	highlight
	27	MER52D:ERV1:LTR	1.38172	0.45038	0.00215577	0.0176843		MER52D:ERV1:LTR	MER52D:ERV1:LTR	ERV	highlight
	28	L1MB2:L1:LINE	1.31581	0.173325	3.15999847021616e-14	4.55491208064015e-12	L1MB2:L1:LINE		L1MB2:L1:LINE	L1	highlight
	31	L1P3:L1:LINE	1.30036	0.322458	5.51526673868603e-05	0.000843167	L1P3:L1:LINE		L1P3:L1:LINE	L1	highlight
	32	L1PA3:L1:LINE	1.2754	0.181218	1.95125649694103e-12	2.18757533934834e-10	L1PA3:L1:LINE		L1PA3:L1:LINE	L1	highlight
	52	MLT2A2:ERVL:LTR	0.851492	0.234415	0.000280779	0.00358615		MLT2A2:ERVL:LTR	MLT2A2:ERVL:LTR	ERV	highlight
	61	LTR12C:ERV1:LTR	0.531561	0.192386	0.00572745	0.0370449		LTR12C:ERV1:LTR	LTR12C:ERV1:LTR	ERV	highlight
	47	L1MDa:L1:LINE	0.959711	0.31422	0.00225613	0.0180669					unchanged
	48	L1PB3:L1:LINE	0.942079	0.335065	0.0049291	0.0327201					unchanged
	49	L1MA4:L1:LINE	0.898601	0.180205	6.14671188061219e-07	1.93813508985553e-05					unchanged
	50	L1P1:L1:LINE	0.884462	0.200541	1.03190961347978e-05	0.000221531					unchanged
	51	L1PA13:L1:LINE	0.853595	0.211511	5.44392159974965e-05	0.000843167					unchanged
	53	L1MB4:L1:LINE	0.807448	0.176184	4.5842002684732e-06	0.00011013					unchanged
	54	L1PA15:L1:LINE	0.801561	0.179486	7.97452825034215e-06	0.00018287					unchanged
	55	L1MD1:L1:LINE	0.756318	0.178312	2.21976765499444e-05	0.000399955					unchanged
	56	L1MC2:L1:LINE	0.704968	0.223842	0.00163609	0.0143549					unchanged
	57	L1MA4A:L1:LINE	0.693785	0.218844	0.00152321	0.0138461					unchanged
	58	L1M1:L1:LINE	0.6738	0.194196	0.00052105	0.00584155					unchanged
	59	L1MA8:L1:LINE	0.62749	0.210254	0.00284097	0.0210775					unchanged
	60	L1MA9:L1:LINE	0.56626	0.189324	0.00278104	0.0209927					unchanged
	62	L1MA6:L1:LINE	0.488235	0.174644	0.00518025	0.0341626					unchanged
	63	L1MEf:L1:LINE	0.487487	0.168133	0.00373859	0.0256615					unchanged
	2	LTR25	5.40797	1.45181	0.000195327	0.00259323					up
	18	FLAM_C:Alu:SINE	1.59536	0.347044	4.28651906115927e-06	0.00010549					up
	19	Tigger5:TcMar-Tigger:DNA	1.55299	0.446109	0.000499204	0.00565951					up
	24	AluYg6:Alu:SINE	1.40691	0.283666	7.05908962938436e-07	2.09488865766142e-05					up
	29	AluYb8:Alu:SINE	1.31444	0.211163	4.82349928565205e-10	3.47636484230208e-08					up
	30	AluYh3a3:Alu:SINE	1.30509	0.310283	2.59783565205821e-05	0.000459862					up
	33	AluYi6:Alu:SINE	1.23959	0.265157	2.94085966860568e-06	7.60853180929008e-05					up
	34	AluYa5:Alu:SINE	1.15014	0.223114	2.5374129025555e-07	9.48240599510557e-06					up
	35	MER1B:hAT-Charlie:DNA	1.11822	0.268888	3.20083351076211e-05	0.000550354					up
	36	L1PA16:L1:LINE	1.09922	0.158417	3.9562959483642e-12	3.99190261189948e-10					up
	37	L1PREC2:L1:LINE	1.09425	0.20869	1.57622583425366e-07	6.6267161115081e-06					up
	38	Charlie2b:hAT-Charlie:DNA	1.08138	0.244133	9.44737889264351e-06	0.000207947					up
	39	L1PA5:L1:LINE	1.07344	0.174019	6.89298336144875e-10	4.63668014113453e-08					up
	40	L1M4b:L1:LINE	1.02902	0.189763	5.87252449548401e-08	2.57625096345364e-06					up
	41	L1MA3:L1:LINE	1.02895	0.184177	2.31380240270797e-08	1.11172696396778e-06					up
	42	L1MEg1:L1:LINE	1.0276	0.338204	0.00237825	0.0187473					up
	43	L1P2:L1:LINE	1.02212	0.256138	6.59346771731354e-05	0.000992957					up
	44	L1PA4:L1:LINE	1.02173	0.180211	1.43108307425098e-08	7.2198141095962e-07					up
	45	L1PA14:L1:LINE	1.00441	0.30504	0.000992211	0.00991229					up
	46	L1HS:L1:LINE	1.00352	0.18129	3.1044634914102e-08	1.42381984674222e-06					up

## Sheet: 2E
RIP triplicates L1 ORF1p
KO	DKO
11.6549	1.24396
9.86007	0.701187
6.70828	1.05485
Paired t test of RIP triplicates L1 ORF1p
Table Analyzed	RIP triplicates L1 ORF1p
Column B	DKO
vs.	vs.
Column A	KO
Paired t test
P value	0.0137
P value summary	*
Significantly different (P < 0.05)?	Yes
One- or two-tailed P value?	One-tailed
t, df	t=5.905, df=2
Number of pairs	3
How big is the difference?
Mean of differences (B - A)	-8.408
SD of differences	2.466
SEM of differences	1.424
95% confidence interval	-14.53 to -2.282
R squared (partial eta squared)	0.9458
How effective was the pairing?
Correlation coefficient (r)	0.1921
P value (one tailed)	0.4385
P value summary	ns
Was the pairing significantly effective?	No
