# Supplementary material for: The domesticated transposon protein L1TD1 associates with its ancestor L1 ORF1p to promote LINE-1 retrotransposition
Source: eLife. 2025 Mar 20;13:RP96850. doi: 10.7554/eLife.96850 (PMC11925450; doi:10.7554/eLife.96850)
Supplement: Figure 3—figure supplement 1—source data 1. [file elife-96850-fig3-figsupp1-data1.xlsx]

## Sheet: 3S1A
	ID	Description	GeneRatio	BgRatio	pvalue	p.adjust	qvalue	geneID	Count	BgNo	inputNo	totalNo	Bg/total
	GO:0009064	glutamine family amino acid metabolic process	15/703	15/92	3.8993406466256e-07	0.00194772065298949	0.00175183009261032	ASS1/CPS1/DGLUCY/ASRGL1/GCLC/PYCR2/GGT1/PFAS/ALDH5A1/GLUD1/ALDH18A1/GFPT2/DDAH1/SLC7A11/ARG2	15	92	703	20973	92/20973
	GO:0045216	cell-cell junction organization	23/703	23/223	1.89921659273125e-06	0.00221174198186218	0.00198929767211165	UGT8/CLDN11/CD9/ANK2/LIMS1/PLEC/CSK/TBX5/CDH6/DCHS1/PKP2/CXADR/EPHA2/CTNNA1/CTNND1/CTNNB1/CDH2/CAV1/MYO1C/F2RL1/GJA1/CLDN3/CLDN6	23	223	703	20973	223/20973
	GO:1901605	alpha-amino acid metabolic process	23/703	23/225	2.21395593779998e-06	0.00221174198186218	0.00198929767211165	GLDC/MCCC2/MCCC1/ASS1/CPS1/ACADSB/MRI1/DGLUCY/ASRGL1/GCLC/PYCR2/GGT1/PFAS/ALDH5A1/GLUD1/IVD/ALDH18A1/GFPT2/SHMT1/DDAH1/SLC7A11/PCBD1/ARG2	23	225	703	20973	225/20973
	GO:0045104	intermediate filament cytoskeleton organization	15/703	15/100	1.17657363773137e-06	0.00221174198186218	0.00198929767211165	PRPH/PLEC/FAM83H/PKP2/TOR1A/EPPK1/KRT18/KRT8/PPL/KRT13/KRT19/INA/KRT33A/KRT33B/KRT86	15	100	703	20973	100/20973
	GO:0045103	intermediate filament-based process	15/703	15/101	1.33962786852632e-06	0.00221174198186218	0.00198929767211165	PRPH/PLEC/FAM83H/PKP2/TOR1A/EPPK1/KRT18/KRT8/PPL/KRT13/KRT19/INA/KRT33A/KRT33B/KRT86	15	101	703	20973	101/20973
	GO:0006739	NADP metabolic process	9/703	9/37	2.71960383045291e-06	0.00226407018885205	0.0020363630084865	NQO1/G6PD/NUDT12/TALDO1/NADK/PGAM1/IDH2/SHPK/TP53	9	37	703	20973	37/20973
	GO:0007043	cell-cell junction assembly	18/703	18/165	1.13298775999286e-05	0.00808467694452048	0.00727156655586395	UGT8/CLDN11/CD9/ANK2/TBX5/CDH6/DCHS1/PKP2/EPHA2/CTNNA1/CTNND1/CTNNB1/CDH2/CAV1/MYO1C/GJA1/CLDN3/CLDN6	18	165	703	20973	165/20973
	GO:0006520	cellular amino acid metabolic process	26/703	26/320	3.20468599478087e-05	0.01878857139211	0.0168989247566568	GLDC/MCCC2/HPDL/MCCC1/ASS1/CPS1/FN3K/ACADSB/MRI1/FARSB/DGLUCY/ASRGL1/GCLC/PYCR2/GGT1/PFAS/ALDH5A1/GLUD1/IVD/ALDH18A1/GFPT2/SHMT1/DDAH1/SLC7A11/PCBD1/ARG2	26	320	703	20973	320/20973
	GO:0043281	regulation of cysteine-type endopeptidase activity involved in apoptotic process	21/703	21/230	3.38532817875856e-05	0.01878857139211	0.0168989247566568	KLF4/MGMT/SFN/F3/PML/CD44/MAPT/IGBP1/PRDX3/SERPINB9/ANP32B/ARRB2/UACA/PAX2/DIABLO/THBS1/CCN1/S100A9/ATP2A3/FAS/CCN2	21	230	703	20973	230/20973
	GO:0007229	integrin-mediated signaling pathway	14/703	14/119	4.5600941013236e-05	0.0224995825230983	0.0202367036949757	FERMT1/NRP1/DOCK1/LIMS1/ILK/NME2/ITGA1/THY1/ITGA2/NEDD9/CTNNA1/PLPP3/CCN2/CD63	14	119	703	20973	119/20973
	GO:0045109	intermediate filament organization	11/703	11/77	4.95486301809972e-05	0.0224995825230983	0.0202367036949757	PRPH/PLEC/PKP2/EPPK1/KRT8/KRT13/KRT19/INA/KRT33A/KRT33B/KRT86	11	77	703	20973	77/20973
	GO:0062197	cellular response to chemical stress	28/703	28/370	5.73644539405509e-05	0.0238779539527543	0.0214764464401992	ANXA1/NQO1/MGMT/PML/MAPT/PLEKHA1/SERPINB6/PRDX3/NUDT2/MAPK1/PLEC/G6PD/TXN/PPIA/SIGMAR1/PYCR2/PAX2/MYLK/MICU1/DIABLO/KDM6B/SLC7A11/CTNNB1/TP53/CAV1/DHRS2/FAS/UCP1	28	370	703	20973	370/20973
	GO:0006098	pentose-phosphate shunt	5/703	5/15	9.46902994024782e-05	0.034564897788649	0.0310885588244991	G6PD/TALDO1/PGAM1/SHPK/TP53	5	15	703	20973	15/20973
	GO:0044282	small molecule catabolic process	29/703	29/402	9.93521178940188e-05	0.034564897788649	0.0310885588244991	GLDC/MCCC2/PFKFB2/DECR1/MCCC1/INPP5A/ACADSB/PFKM/ASRGL1/SORD/NUDT1/EHHADH/MLYCD/ALDH5A1/GLUD1/IVD/SHMT1/DDAH1/TP53/TYSND1/CRAT/APOE/INPP5K/ENTPD7/ALDH2/ACADVL/ACADL/TKTL1/ARG2	29	402	703	20973	402/20973
	GO:0001822	kidney development	25/703	25/324	0.000103798491857805	0.034564897788649	0.0310885588244991	ALDH1A2/HPGD/ASS1/NRP1/LAMB2/IFT27/AMER1/ID3/FREM2/ILK/BAG6/DCHS1/PAX2/SGPL1/SDC4/LRP4/PROM1/CRLF1/LZTS2/CTNNB1/PODXL/SDC1/LIN28A/ARG2/EPCAM	25	324	703	20973	324/20973
	GO:0006066	alcohol metabolic process	28/703	28/388	0.000129432159122784	0.0404071021761442	0.0363431878378976	ALDH1A2/ABCA1/AKR1C1/INPP5A/CES1/ABCA2/PMVK/SORD/G6PD/THTPA/MINPP1/LIMA1/ITPKA/ERLIN1/IDH2/SREBF1/VLDLR/ALDH3A2/PLPP3/PCBD1/APOE/CLN6/DGAT1/INPP5K/ALDH2/ACADVL/ACADL/TKTL1	28	388	703	20973	388/20973
	GO:0009112	nucleobase metabolic process	7/703	7/36	0.000164893904508463	0.0443324395195343	0.0398737372887356	CPS1/TYMP/APRT/MAPK1/HPRT1/UMPS/SHMT1	7	36	703	20973	36/20973
	GO:0001655	urogenital system development	27/703	27/374	0.000168631902076307	0.0443324395195343	0.0398737372887356	ANXA1/ALDH1A2/HPGD/ASS1/NRP1/FOXA1/LAMB2/IFT27/AMER1/ID3/FREM2/ILK/BAG6/DCHS1/PAX2/SGPL1/SDC4/LRP4/PROM1/CRLF1/LZTS2/CTNNB1/PODXL/SDC1/LIN28A/ARG2/EPCAM	27	374	703	20973	374/20973
	GO:0072001	renal system development	25/703	25/333	0.000159424114666828	0.0443324395195343	0.0398737372887356	ALDH1A2/HPGD/ASS1/NRP1/LAMB2/IFT27/AMER1/ID3/FREM2/ILK/BAG6/DCHS1/PAX2/SGPL1/SDC4/LRP4/PROM1/CRLF1/LZTS2/CTNNB1/PODXL/SDC1/LIN28A/ARG2/EPCAM	25	333	703	20973	333/20973
	GO:0006536	glutamate metabolic process	7/703	7/37	0.000197542370180764	0.0448510972296779	0.0403402313842823	DGLUCY/GCLC/GGT1/ALDH5A1/GLUD1/ALDH18A1/SLC7A11	7	37	703	20973	37/20973
	GO:0034329	cell junction assembly	31/703	31/459	0.000190736810137059	0.0448510972296779	0.0403402313842823	UGT8/CLDN11/CD9/NRP1/ANK2/LIMS1/PLEC/TBX5/CDH6/DCHS1/PKP2/EPHA2/THY1/FARP1/SDC4/SPTBN2/THBS1/ITGA2/LRP4/CTNNA1/CTNND1/OBSL1/CTNNB1/LRRN1/LIMCH1/CDH2/CAV1/MYO1C/GJA1/CLDN3/CLDN6	31	459	703	20973	459/20973
	GO:0072521	purine-containing compound metabolic process	30/703	30/439	0.000196752164086085	0.0448510972296779	0.0403402313842823	MCCC2/AK4/FAR2/PFKFB2/PGK1/PMVK/STAT3/PGM2/APRT/PRTFDC1/PFKM/NUDT2/IMPDH1/HPRT1/NUDT1/NME2/PANK1/PGAM1/MFN1/PFAS/MLYCD/ADCY7/EPHA2/SLC25A16/ACSL6/ENO3/SHMT1/ENPP1/DGAT1/ENTPD7	30	439	703	20973	439/20973
	GO:0006740	NADPH regeneration	5/703	5/18	0.000248486407766043	0.0477380617996686	0.0429368416334199	G6PD/TALDO1/PGAM1/SHPK/TP53	5	18	703	20973	18/20973
	GO:2000116	regulation of cysteine-type endopeptidase activity	21/703	21/264	0.00024000425875162	0.0477380617996686	0.0429368416334199	KLF4/MGMT/SFN/F3/PML/CD44/MAPT/IGBP1/PRDX3/SERPINB9/ANP32B/ARRB2/UACA/PAX2/DIABLO/THBS1/CCN1/S100A9/ATP2A3/FAS/CCN2	21	264	703	20973	264/20973
	GO:0002064	epithelial cell development	19/703	19/226	0.000232758153639083	0.0477380617996686	0.0429368416334199	MYD88/SFN/FOXA1/MSN/LAMB2/PLEC/IFT74/FNDC3A/EPHA2/TMOD1/COL18A1/EXPH5/PODXL/CDH2/SDC1/F2RL1/GJA1/CLDN3/SPINT2	19	226	703	20973	226/20973
	GO:0016482	cytosolic transport	17/703	17/189	0.000220998227383024	0.0477380617996686	0.0429368416334199	DENND10/CES1/VTI1A/MSN/SNX12/CORO7/MAPK1/TBC1D17/HEATR5A/VAMP3/KIF1C/TMEM87A/RHOBTB3/STX8/WDR81/ANKFY1/HOOK1	17	189	703	20973	189/20973
	GO:0070542	response to fatty acid	9/703	9/64	0.000268783374916569	0.0479490342038665	0.0431265956445081	GLDC/AKR1C1/ASS1/CPS1/ID3/SCD/SREBF1/CCN2/UCP1	9	64	703	20973	64/20973
	GO:0042060	wound healing	32/703	32/489	0.000266051130464998	0.0479490342038665	0.0431265956445081	ANXA1/FERMT1/CD9/F3/PDPN/CD44/VAV2/PLEC/ILK/CHMP1A/PPIA/JMJD1C/MYLK/SRSF6/TOR1A/TFPI2/SDC4/THBS1/ITGA2/EPPK1/CCN1/HGFAC/TNFRSF12A/SLC7A11/PLPP3/CAV1/APOE/SDC1/F2RL1/PPL/CLDN3/GNAS	32	489	703	20973	489/20973
	GO:0022604	regulation of cell morphogenesis	24/703	24/328	0.000312868397075599	0.0538888842549177	0.0484690496812579	ANXA1/PARVA/CDKL5/PDZD8/PDPN/NRP1/DOCK1/CD44/MSN/ARHGAP18/LIMS1/ILK/DNMBP/RHOBTB3/ITPKA/DVL2/SPARC/NEDD9/PAFAH1B1/OBSL1/MYH10/C1QBP/CLDN3/ARPIN	24	328	703	20973	328/20973
	GO:0048333	mesodermal cell differentiation	7/703	7/40	0.000327875108900012	0.054591205631852	0.0491007356065	KLF4/HMGA2/PAX2/KDM6B/ITGA2/BMPR1A/GJA1	7	40	703	20973	40/20973
	GO:0098901	regulation of cardiac muscle cell action potential	6/703	6/29	0.000340928687877594	0.0549335095467285	0.0494086125589668	ANK2/CALM1/PKP2/CXADR/DSC2/CAV1	6	29	703	20973	29/20973
	GO:1903034	regulation of response to wounding	16/703	16/179	0.000359304549917902	0.0556552475249617	0.0500577622752303	ANXA1/KLF4/FERMT1/CD9/F3/INPP5F/MYLK/SRSF6/THBS1/EPPK1/TNFRSF12A/PLPP3/CAV1/APOE/F2RL1/CLDN3	16	179	703	20973	179/20973
	GO:0061041	regulation of wound healing	14/703	14/145	0.000378608370833135	0.0556552475249617	0.0500577622752303	ANXA1/FERMT1/CD9/F3/MYLK/SRSF6/THBS1/EPPK1/TNFRSF12A/PLPP3/CAV1/APOE/F2RL1/CLDN3	14	145	703	20973	145/20973
	GO:1903321	negative regulation of protein modification by small protein conjugation or removal	12/703	12/112	0.000378834517687427	0.0556552475249617	0.0500577622752303	RPL37/TRIM21/ARRB1/GCLC/MAGEA2/FBXO5/PPIA/ARRB2/BUB1B/CTNNB1/CAV1/NXN	12	112	703	20973	112/20973
	GO:0051972	regulation of telomerase activity	8/703	8/54	0.000407642569209402	0.0574161740207304	0.0516415848944687	KLF4/MAPK1/PARP4/WRAP53/SMG6/CTNNB1/TP53/AURKB	8	54	703	20973	54/20973
	GO:0046112	nucleobase biosynthetic process	5/703	5/20	0.000425304992746151	0.0574161740207304	0.0516415848944687	CPS1/APRT/HPRT1/UMPS/SHMT1	5	20	703	20973	20/20973
	GO:0019693	ribose phosphate metabolic process	28/703	28/417	0.00042047529398884	0.0574161740207304	0.0516415848944687	MCCC2/AK4/FAR2/PFKFB2/PGK1/PMVK/STAT3/APRT/PFKM/NUDT2/IMPDH1/HPRT1/G6PD/UMPS/NME2/PANK1/PGAM1/MFN1/PFAS/MLYCD/ADCY7/EPHA2/SLC25A16/ACSL6/ENO3/ENPP1/DGAT1/ENTPD7	28	417	703	20973	417/20973
	GO:0010770	positive regulation of cell morphogenesis involved in differentiation	10/703	10/83	0.000450029174351556	0.0576383519457954	0.0518414174394721	CDKL5/NRP1/DOCK1/LIMS1/ILK/ITPKA/NEDD9/PAFAH1B1/OBSL1/C1QBP	10	83	703	20973	83/20973
	GO:0072527	pyrimidine-containing compound metabolic process	10/703	10/83	0.000450029174351556	0.0576383519457954	0.0518414174394721	CPS1/TYMP/MAPK1/THTPA/DCTPP1/UMPS/NME2/SHMT1/ENTPD7/TKTL1	10	83	703	20973	83/20973
	GO:0042451	purine nucleoside biosynthetic process	4/703	4/12	0.000499638299405937	0.059421269179349	0.0534450190943494	PGM2/APRT/PRTFDC1/HPRT1	4	12	703	20973	12/20973
	GO:0042455	ribonucleoside biosynthetic process	4/703	4/12	0.000499638299405937	0.059421269179349	0.0534450190943494	PGM2/APRT/PRTFDC1/HPRT1	4	12	703	20973	12/20973
	GO:0046129	purine ribonucleoside biosynthetic process	4/703	4/12	0.000499638299405937	0.059421269179349	0.0534450190943494	PGM2/APRT/PRTFDC1/HPRT1	4	12	703	20973	12/20973
	GO:0009168	purine ribonucleoside monophosphate biosynthetic process	5/703	5/21	0.000542915460608679	0.0602636161275634	0.0542026476228735	APRT/NUDT2/IMPDH1/HPRT1/PFAS	5	21	703	20973	21/20973
	GO:0051402	neuron apoptotic process	20/703	20/261	0.000540091536311623	0.0602636161275634	0.0542026476228735	GABRA5/NQO1/CASP7/NRP1/GCLC/STAMBP/G6PD/SIGMAR1/ITGA1/ARRB2/TRIM2/DIABLO/CNTFR/MAP2K4/CRLF1/PCDHGC3/CTNNB1/TP53/APOE/FAS	20	261	703	20973	261/20973
	GO:0043648	dicarboxylic acid metabolic process	11/703	11/100	0.000524231088187456	0.0602636161275634	0.0542026476228735	ASS1/DGLUCY/GCLC/GGT1/SLC25A32/ALDH5A1/GLUD1/ALDH18A1/SHMT1/IDH2/SLC7A11	11	100	703	20973	100/20973
	GO:0045022	early endosome to late endosome transport	7/703	7/44	0.000600151009664733	0.0608099793581106	0.0546940607766537	DENND10/MSN/SNX12/MAPK1/STX8/WDR81/HOOK1	7	44	703	20973	44/20973
	GO:0043094	cellular metabolic compound salvage	6/703	6/32	0.000597129495803056	0.0608099793581106	0.0546940607766537	NAPRT/PGM2/APRT/PRTFDC1/MRI1/HPRT1	6	32	703	20973	32/20973
	GO:0048736	appendage development	16/703	16/188	0.000617750960947336	0.0608099793581106	0.0546940607766537	ALDH1A2/FREM2/TBX5/SALL4/ZNF219/FBXW4/COL2A1/ROR2/SLC39A1/BMPR1A/LRP4/SLC7A11/CTNNB1/CRABP2/GJA1/IFT80	16	188	703	20973	188/20973
	GO:0060173	limb development	16/703	16/188	0.000617750960947336	0.0608099793581106	0.0546940607766537	ALDH1A2/FREM2/TBX5/SALL4/ZNF219/FBXW4/COL2A1/ROR2/SLC39A1/BMPR1A/LRP4/SLC7A11/CTNNB1/CRABP2/GJA1/IFT80	16	188	703	20973	188/20973
	GO:0031532	actin cytoskeleton reorganization	12/703	12/117	0.000564931754235706	0.0608099793581106	0.0546940607766537	ANXA1/PARVA/NRP1/ARHGDIA/HCLS1/PLEC/TNIK/CXADR/BAIAP2L1/NEDD9/MINK1/CLDN3	12	117	703	20973	117/20973
	GO:0010769	regulation of cell morphogenesis involved in differentiation	11/703	11/102	0.000620882672124853	0.0608099793581106	0.0546940607766537	CDKL5/PDPN/NRP1/DOCK1/LIMS1/ILK/ITPKA/NEDD9/PAFAH1B1/OBSL1/C1QBP	11	102	703	20973	102/20973
	GO:0009259	ribonucleotide metabolic process	27/703	27/407	0.000635998653346589	0.0610925629512733	0.0549482237344785	MCCC2/AK4/FAR2/PFKFB2/PGK1/PMVK/STAT3/APRT/PFKM/NUDT2/IMPDH1/HPRT1/UMPS/NME2/PANK1/PGAM1/MFN1/PFAS/MLYCD/ADCY7/EPHA2/SLC25A16/ACSL6/ENO3/ENPP1/DGAT1/ENTPD7	27	407	703	20973	407/20973
	GO:1904950	negative regulation of establishment of protein localization	13/703	13/136	0.000665705160593448	0.0627395712672504	0.056429585410384	YOD1/FERMT1/BAG3/SERGEF/MAPT/SNX12/TXN/CSK/SRCIN1/SREBF1/APOE/DERL2/INPP5K	13	136	703	20973	136/20973
	GO:0070486	leukocyte aggregation	4/703	4/13	0.000702626942955745	0.0646967882155393	0.0581899567154358	CD44/MSN/JAM2/S100A9	4	13	703	20973	13/20973
	GO:0009150	purine ribonucleotide metabolic process	26/703	26/389	0.00071237704741835	0.0646967882155393	0.0581899567154358	MCCC2/AK4/FAR2/PFKFB2/PGK1/PMVK/STAT3/APRT/PFKM/NUDT2/IMPDH1/HPRT1/NME2/PANK1/PGAM1/MFN1/PFAS/MLYCD/ADCY7/EPHA2/SLC25A16/ACSL6/ENO3/ENPP1/DGAT1/ENTPD7	26	389	703	20973	389/20973
	GO:0032386	regulation of intracellular transport	24/703	24/349	0.000758993032182695	0.0676994677812957	0.0608906440104462	YOD1/FERMT1/SFN/INPP5F/BAG3/DENND10/TRIM58/MSN/ABCA2/UBL5/HCLS1/SNX12/MAPK1/TXN/ANP32B/UBE2L3/KIF20B/YWHAE/SREBF1/NOLC1/AKAP5/MYO1C/DERL2/INPP5K	24	349	703	20973	349/20973
	GO:1901607	alpha-amino acid biosynthetic process	9/703	9/74	0.000801726420559737	0.0690452322533773	0.0621010592186743	ASS1/CPS1/MRI1/PYCR2/GGT1/GLUD1/ALDH18A1/SHMT1/PCBD1	9	74	703	20973	74/20973
	GO:0009124	nucleoside monophosphate biosynthetic process	7/703	7/46	0.00079113125270373	0.0690452322533773	0.0621010592186743	APRT/NUDT2/IMPDH1/HPRT1/UMPS/PFAS/SHMT1	7	46	703	20973	46/20973
	GO:0010823	negative regulation of mitochondrion organization	8/703	8/60	0.000840622701576248	0.0695445971308884	0.0625502008439243	LMNA/MAPT/GCLC/ARRB2/OMA1/GHITM/CLU/TP53	8	60	703	20973	60/20973
	GO:0050687	negative regulation of defense response to virus	6/703	6/34	0.000837232364873026	0.0695445971308884	0.0625502008439243	TSPAN6/TRIM38/ILRUN/UFD1/MICB/C1QBP	6	34	703	20973	34/20973
	GO:0009127	purine nucleoside monophosphate biosynthetic process	5/703	5/23	0.000849293378375214	0.0695445971308884	0.0625502008439243	APRT/NUDT2/IMPDH1/HPRT1/PFAS	5	23	703	20973	23/20973
	GO:0086065	cell communication involved in cardiac conduction	8/703	8/61	0.000939577968466356	0.072481370951526	0.0651916108152601	ANK2/CALM1/TBX5/PKP2/CXADR/DSC2/CAV1/GJA1	8	61	703	20973	61/20973
	GO:0098927	vesicle-mediated transport between endosomal compartments	7/703	7/47	0.000903087466397979	0.072481370951526	0.0651916108152601	DENND10/MSN/SNX12/MAPK1/STX8/WDR81/HOOK1	7	47	703	20973	47/20973
	GO:0000052	citrulline metabolic process	4/703	4/14	0.000957711808368511	0.072481370951526	0.0651916108152601	ASS1/CPS1/ALDH18A1/DDAH1	4	14	703	20973	14/20973
	GO:0043101	purine-containing compound salvage	4/703	4/14	0.000957711808368511	0.072481370951526	0.0651916108152601	PGM2/APRT/PRTFDC1/HPRT1	4	14	703	20973	14/20973
	GO:1990542	mitochondrial transmembrane transport	10/703	10/91	0.00093623393073366	0.072481370951526	0.0651916108152601	ABCB7/GRPEL2/SLC25A22/PSEN2/TIMM21/SLC25A32/CCDC51/MICU1/MICU2/UCP1	10	91	703	20973	91/20973
	GO:0009156	ribonucleoside monophosphate biosynthetic process	6/703	6/35	0.000982159478134671	0.073222187959443	0.0658579207019446	APRT/NUDT2/IMPDH1/HPRT1/UMPS/PFAS	6	35	703	20973	35/20973
	GO:0046039	GTP metabolic process	5/703	5/24	0.00104346894415774	0.0766489320009987	0.0689400225025578	AK4/IMPDH1/NME2/MFN1/ENTPD7	5	24	703	20973	24/20973
	GO:0006979	response to oxidative stress	30/703	30/487	0.0010837477327596	0.0780039556131325	0.0701587656196933	ANXA1/NQO1/MGMT/PML/MAPT/PLEKHA1/NAPRT/PRDX3/NUDT2/GCLC/MAPK1/G6PD/TXN/NUDT1/PPIA/SIGMAR1/PYCR2/PAX2/TOR1A/DIABLO/KDM6B/SCARA3/MICB/SLC7A11/CTNNB1/TP53/APOE/DHRS2/SDC1/UCP1	30	487	703	20973	487/20973
	GO:0032355	response to estradiol	12/703	12/126	0.00109314852711097	0.0780039556131325	0.0701587656196933	ANXA1/NQO1/ALDH1A2/HPGD/ASS1/FOXA1/STAT3/LCOR/ITGA2/CTNNB1/CCN2/CCND1	12	126	703	20973	126/20973
	GO:0001570	vasculogenesis	9/703	9/80	0.00140862417164079	0.0790609461295629	0.0711094500987249	AMOT/TBX5/TGFBR3/ZMIZ1/HIF1AN/SGPL1/EPHA2/CTNNB1/CAV1	9	80	703	20973	80/20973
	GO:0008652	cellular amino acid biosynthetic process	9/703	9/80	0.00140862417164079	0.0790609461295629	0.0711094500987249	ASS1/CPS1/MRI1/PYCR2/GGT1/GLUD1/ALDH18A1/SHMT1/PCBD1	9	80	703	20973	80/20973
	GO:0032387	negative regulation of intracellular transport	8/703	8/63	0.00116541867477199	0.0790609461295629	0.0711094500987249	YOD1/FERMT1/BAG3/ABCA2/SNX12/TXN/DERL2/INPP5K	8	63	703	20973	63/20973
	GO:0006767	water-soluble vitamin metabolic process	8/703	8/65	0.00143255012043004	0.0790609461295629	0.0711094500987249	MCCC1/GCLC/THTPA/PNPO/SLC25A32/ALPL/SHMT1/TKTL1	8	65	703	20973	65/20973
	GO:0010761	fibroblast migration	7/703	7/50	0.00131524950906464	0.0790609461295629	0.0711094500987249	ARHGAP4/PML/PLEC/ILK/SGPL1/SDC4/THBS1	7	50	703	20973	50/20973
	GO:0071398	cellular response to fatty acid	6/703	6/36	0.00114561259285991	0.0790609461295629	0.0711094500987249	AKR1C1/ASS1/CPS1/ID3/SREBF1/UCP1	6	36	703	20973	36/20973
	GO:0006167	AMP biosynthetic process	4/703	4/15	0.00127153781162888	0.0790609461295629	0.0711094500987249	APRT/NUDT2/HPRT1/PFAS	4	15	703	20973	15/20973
	GO:0006177	GMP biosynthetic process	4/703	4/15	0.00127153781162888	0.0790609461295629	0.0711094500987249	APRT/IMPDH1/HPRT1/PFAS	4	15	703	20973	15/20973
	GO:0006206	pyrimidine nucleobase metabolic process	4/703	4/15	0.00127153781162888	0.0790609461295629	0.0711094500987249	CPS1/TYMP/MAPK1/UMPS	4	15	703	20973	15/20973
	GO:0046394	carboxylic acid biosynthetic process	23/703	23/340	0.00120478758944359	0.0790609461295629	0.0711094500987249	ANXA1/ALDH1A2/ASS1/CPS1/CES1/RBP1/MRI1/GSTM2/CBR1/MIF/PYCR2/GGT1/MLYCD/GLUD1/ALDH18A1/SCD/ERLIN1/SHMT1/PCBD1/GATM/ACADVL/CRABP2/ACADL	23	340	703	20973	340/20973
	GO:0016053	organic acid biosynthetic process	23/703	23/342	0.00130142817636044	0.0790609461295629	0.0711094500987249	ANXA1/ALDH1A2/ASS1/CPS1/CES1/RBP1/MRI1/GSTM2/CBR1/MIF/PYCR2/GGT1/MLYCD/GLUD1/ALDH18A1/SCD/ERLIN1/SHMT1/PCBD1/GATM/ACADVL/CRABP2/ACADL	23	342	703	20973	342/20973
	GO:0034599	cellular response to oxidative stress	22/703	22/320	0.00124066115985936	0.0790609461295629	0.0711094500987249	ANXA1/NQO1/MGMT/PML/MAPT/PLEKHA1/PRDX3/NUDT2/MAPK1/G6PD/TXN/PPIA/SIGMAR1/PYCR2/PAX2/DIABLO/KDM6B/SLC7A11/CTNNB1/TP53/DHRS2/UCP1	22	320	703	20973	320/20973
	GO:1903828	negative regulation of protein localization	17/703	17/220	0.00125013737593794	0.0790609461295629	0.0711094500987249	YOD1/FERMT1/BAG3/SERGEF/MAPT/SNX12/ILRUN/TXN/CSK/SRCIN1/MAP1A/CTNNA1/SREBF1/LZTS2/APOE/DERL2/INPP5K	17	220	703	20973	220/20973
	GO:0048863	stem cell differentiation	17/703	17/222	0.00137908431445013	0.0790609461295629	0.0711094500987249	ALDH1A2/NRP1/FOXA1/STAT3/LBH/MAPK1/TBX5/HMGA2/OCIAD1/PAX2/BMPR1A/NOLC1/CTNNB1/TP53/CDH2/LIN28A/EPCAM	17	222	703	20973	222/20973
	GO:0060401	cytosolic calcium ion transport	16/703	16/204	0.00147200560361348	0.0790609461295629	0.0711094500987249	ITPR2/PML/ANK2/GSTM2/CALM1/PSEN2/IBTK/MICU1/MICU2/THY1/JPH1/YWHAE/RASA3/ATP2A3/CAV1/CCN2	16	204	703	20973	204/20973
	GO:0030178	negative regulation of Wnt signaling pathway	15/703	15/182	0.00125037214725421	0.0790609461295629	0.0711094500987249	FERMT1/AMER1/PTPRU/ROR2/LRP4/LZTS2/CTNND1/MCC/CTNNB1/CDH2/CAV1/APOE/NXN/TMEM88/IFT80	15	182	703	20973	182/20973
	GO:0090090	negative regulation of canonical Wnt signaling pathway	13/703	13/146	0.0012884762478708	0.0790609461295629	0.0711094500987249	FERMT1/AMER1/PTPRU/ROR2/LRP4/LZTS2/CTNND1/MCC/CTNNB1/CDH2/CAV1/APOE/TMEM88	13	146	703	20973	146/20973
	GO:0072073	kidney epithelium development	13/703	13/148	0.00145837332144881	0.0790609461295629	0.0711094500987249	LAMB2/ILK/DCHS1/PAX2/SDC4/PROM1/CRLF1/LZTS2/CTNNB1/PODXL/SDC1/ARG2/EPCAM	13	148	703	20973	148/20973
	GO:0051224	negative regulation of protein transport	12/703	12/130	0.0014339997860197	0.0790609461295629	0.0711094500987249	YOD1/FERMT1/BAG3/SERGEF/SNX12/TXN/CSK/SRCIN1/SREBF1/APOE/DERL2/INPP5K	12	130	703	20973	130/20973
	GO:0120162	positive regulation of cold-induced thermogenesis	11/703	11/110	0.00116822244699717	0.0790609461295629	0.0711094500987249	DECR1/OMA1/KDM6B/SCD/ALPL/GATM/CAV1/GJA1/ACADL/UCP1/GNAS	11	110	703	20973	110/20973
	GO:0034109	homotypic cell-cell adhesion	11/703	11/112	0.00135416590999773	0.0790609461295629	0.0711094500987249	CD9/PDPN/ILK/PPIA/PTPRU/PKP2/CXADR/DSC2/SLC7A11/PLPP3/GNAS	11	112	703	20973	112/20973
	GO:0034446	substrate adhesion-dependent cell spreading	11/703	11/113	0.00145585958896457	0.0790609461295629	0.0711094500987249	PARVA/PDPN/NRP1/DOCK1/LAMB2/LIMS1/ILK/VAMP3/SRCIN1/NEDD9/C1QBP	11	113	703	20973	113/20973
	GO:0045807	positive regulation of endocytosis	11/703	11/113	0.00145585958896457	0.0790609461295629	0.0711094500987249	ARRB1/ARRB2/TOR1A/ITGA2/ATAD1/ANKFY1/CLU/APOE/F2RL1/CD63/H1-1	11	113	703	20973	113/20973
	GO:0090181	regulation of cholesterol metabolic process	6/703	6/38	0.00153421548118992	0.0798271492556628	0.0717985929135807	CES1/ERLIN1/SREBF1/APOE/ACADVL/ACADL	6	38	703	20973	38/20973
	GO:0046033	AMP metabolic process	5/703	5/26	0.00152793216040078	0.0798271492556628	0.0717985929135807	AK4/APRT/NUDT2/HPRT1/PFAS	5	26	703	20973	26/20973
	GO:0051156	glucose 6-phosphate metabolic process	5/703	5/26	0.00152793216040078	0.0798271492556628	0.0717985929135807	G6PD/TALDO1/PGAM1/SHPK/TP53	5	26	703	20973	26/20973
	GO:0009163	nucleoside biosynthetic process	4/703	4/16	0.00165073674521343	0.0824543004234108	0.0741615203007465	PGM2/APRT/PRTFDC1/HPRT1	4	16	703	20973	16/20973
	GO:0032488	Cdc42 protein signal transduction	4/703	4/16	0.00165073674521343	0.0824543004234108	0.0741615203007465	ABCA1/NRP1/SHTN1/APOE	4	16	703	20973	16/20973
	GO:0034404	nucleobase-containing small molecule biosynthetic process	4/703	4/16	0.00165073674521343	0.0824543004234108	0.0741615203007465	PGM2/APRT/PRTFDC1/HPRT1	4	16	703	20973	16/20973
	GO:0048813	dendrite morphogenesis	13/703	13/150	0.00164646084333419	0.0824543004234108	0.0741615203007465	CDKL5/NRP1/HPRT1/TNIK/FARP1/SRCIN1/ITPKA/SARM1/LRP4/VLDLR/PAFAH1B1/MINK1/OBSL1	13	150	703	20973	150/20973
	GO:0009123	nucleoside monophosphate metabolic process	9/703	9/82	0.00167798626516426	0.0829855583613415	0.0746393473655141	AK4/TYMP/APRT/NUDT2/IMPDH1/HPRT1/UMPS/PFAS/SHMT1	9	82	703	20973	82/20973
	GO:0086064	cell communication by electrical coupling involved in cardiac conduction	5/703	5/27	0.00182407047017034	0.0873093583338757	0.0785282843620424	CALM1/TBX5/PKP2/CAV1/GJA1	5	27	703	20973	27/20973
	GO:0043523	regulation of neuron apoptotic process	17/703	17/228	0.00183533185686826	0.0873093583338757	0.0785282843620424	GABRA5/NQO1/NRP1/GCLC/STAMBP/G6PD/SIGMAR1/ITGA1/ARRB2/TRIM2/CNTFR/MAP2K4/CRLF1/PCDHGC3/CTNNB1/TP53/APOE	17	228	703	20973	228/20973
	GO:0035637	multicellular organismal signaling	14/703	14/170	0.00180539301585395	0.0873093583338757	0.0785282843620424	ANK2/TYMP/CALM1/PLEC/TBX5/PKP2/CXADR/YWHAE/ITGA2/PAFAH1B1/DSC2/ATP2A3/CAV1/GJA1	14	170	703	20973	170/20973
	GO:0010927	cellular component assembly involved in morphogenesis	11/703	11/116	0.00179908861813902	0.0873093583338757	0.0785282843620424	UGT8/CD9/ANK2/ABCA2/PLEC/PHLDB1/TMOD1/PAFAH1B1/OBSL1/CSRP2/KRT19	11	116	703	20973	116/20973
	GO:0006163	purine nucleotide metabolic process	26/703	26/416	0.00185515626822346	0.0874198637714736	0.0786276757971971	MCCC2/AK4/FAR2/PFKFB2/PGK1/PMVK/STAT3/APRT/PFKM/NUDT2/IMPDH1/HPRT1/NME2/PANK1/PGAM1/MFN1/PFAS/MLYCD/ADCY7/EPHA2/SLC25A16/ACSL6/ENO3/ENPP1/DGAT1/ENTPD7	26	416	703	20973	416/20973
	GO:0007015	actin filament organization	29/703	29/484	0.00196994674235508	0.0894534907096695	0.0804567722140814	NRP1/SHTN1/ARHGAP18/HCLS1/ARRB1/CORO7/DIAPH2/PLEC/CGNL1/AIF1L/ADD3/CALD1/RHOBTB3/BAIAP2L1/TMOD1/SHROOM2/LIMA1/SDC4/SPTBN2/NEDD9/CTNNA1/MPRIP/LIMCH1/MYO1C/INPP5K/CCN2/F2RL1/RFLNB/ARPIN	29	484	703	20973	484/20973
	GO:0035107	appendage morphogenesis	13/703	13/153	0.00196590606456917	0.0894534907096695	0.0804567722140814	ALDH1A2/FREM2/TBX5/SALL4/ZNF219/FBXW4/COL2A1/ROR2/BMPR1A/LRP4/CTNNB1/CRABP2/GJA1	13	153	703	20973	153/20973
	GO:0035108	limb morphogenesis	13/703	13/153	0.00196590606456917	0.0894534907096695	0.0804567722140814	ALDH1A2/FREM2/TBX5/SALL4/ZNF219/FBXW4/COL2A1/ROR2/BMPR1A/LRP4/CTNNB1/CRABP2/GJA1	13	153	703	20973	153/20973
	GO:0001657	ureteric bud development	10/703	10/100	0.00192847314621376	0.0894534907096695	0.0804567722140814	ILK/DCHS1/PAX2/SDC4/CRLF1/LZTS2/CTNNB1/SDC1/ARG2/EPCAM	10	100	703	20973	100/20973
	GO:0032506	cytokinetic process	6/703	6/40	0.00201570928034351	0.0898970344224627	0.0808557068468617	PLEC/CHMP1A/CNTROB/KIF20B/CEP55/AURKB	6	40	703	20973	40/20973
	GO:0072524	pyridine-containing compound metabolic process	6/703	6/40	0.00201570928034351	0.0898970344224627	0.0808557068468617	NAPRT/NUDT12/NADK/PNPO/ALPL/SARM1	6	40	703	20973	40/20973
	GO:0072163	mesonephric epithelium development	10/703	10/101	0.0020776621702117	0.0910344082474335	0.0818786901427841	ILK/DCHS1/PAX2/SDC4/CRLF1/LZTS2/CTNNB1/SDC1/ARG2/EPCAM	10	101	703	20973	101/20973
	GO:0072164	mesonephric tubule development	10/703	10/101	0.0020776621702117	0.0910344082474335	0.0818786901427841	ILK/DCHS1/PAX2/SDC4/CRLF1/LZTS2/CTNNB1/SDC1/ARG2/EPCAM	10	101	703	20973	101/20973
	GO:0042278	purine nucleoside metabolic process	5/703	5/28	0.00216012639326406	0.0938246202987302	0.0843882786860504	PGM2/APRT/PRTFDC1/HPRT1/NUDT1	5	28	703	20973	28/20973
	GO:0006766	vitamin metabolic process	11/703	11/119	0.00220558096556824	0.0938559563051259	0.0844164630968395	ALDH1A2/MCCC1/RBP1/GCLC/THTPA/CBR1/PNPO/SLC25A32/ALPL/SHMT1/TKTL1	11	119	703	20973	119/20973
	GO:0015918	sterol transport	10/703	10/102	0.00223600776782983	0.0938559563051259	0.0844164630968395	ABCA1/AKR1C1/CES1/ABCA2/LIMA1/GRAMD1A/GRAMD1B/CLU/CAV1/APOE	10	102	703	20973	102/20973
	GO:0061337	cardiac conduction	10/703	10/102	0.00223600776782983	0.0938559563051259	0.0844164630968395	ANK2/CALM1/TBX5/PKP2/CXADR/YWHAE/DSC2/ATP2A3/CAV1/GJA1	10	102	703	20973	102/20973
	GO:0061640	cytoskeleton-dependent cytokinesis	10/703	10/102	0.00223600776782983	0.0938559563051259	0.0844164630968395	PLEC/STAMBP/CHMP1A/CNTROB/KIF20B/CEP55/LZTS2/AURKB/MYH10/TTC19	10	102	703	20973	102/20973
	GO:0043627	response to estrogen	8/703	8/70	0.00231543345995842	0.096379917770769	0.0866865790096712	SRA1/SERPINB9/PELP1/CTNNA1/CAV1/CCND1/KRT19/SLC34A2	8	70	703	20973	70/20973
	GO:0030048	actin filament-based movement	12/703	12/138	0.00238017443475374	0.0982559611702062	0.0883739407353543	PARVA/PDPN/ANK2/SHTN1/PKP2/MYL6B/DSC2/LIMCH1/CAV1/MYH10/MYO1C/GJA1	12	138	703	20973	138/20973
	GO:0043154	negative regulation of cysteine-type endopeptidase activity involved in apoptotic process	9/703	9/88	0.00274108788601494	0.103256133081937	0.0928712240648458	KLF4/SFN/CD44/IGBP1/PRDX3/SERPINB9/ARRB2/PAX2/THBS1	9	88	703	20973	88/20973
	GO:0000281	mitotic cytokinesis	8/703	8/72	0.00276940403057252	0.103256133081937	0.0928712240648458	STAMBP/CHMP1A/CNTROB/KIF20B/CEP55/LZTS2/MYH10/TTC19	8	72	703	20973	72/20973
	GO:0071260	cellular response to mechanical stimulus	8/703	8/72	0.00276940403057252	0.103256133081937	0.0928712240648458	MYD88/TNFRSF10A/BAG3/GCLC/PLEC/ITGA2/MAP2K4/FAS	8	72	703	20973	72/20973
	GO:1900026	positive regulation of substrate adhesion-dependent cell spreading	6/703	6/42	0.00260336797598934	0.103256133081937	0.0928712240648458	NRP1/DOCK1/LIMS1/ILK/NEDD9/C1QBP	6	42	703	20973	42/20973
	GO:0010875	positive regulation of cholesterol efflux	5/703	5/29	0.00253912591521957	0.103256133081937	0.0928712240648458	ABCA1/ABCA3/CES1/CAV1/APOE	5	29	703	20973	29/20973
	GO:0003334	keratinocyte development	4/703	4/18	0.00263141664910509	0.103256133081937	0.0928712240648458	SFN/PLEC/IFT74/EXPH5	4	18	703	20973	18/20973
	GO:0016264	gap junction assembly	4/703	4/18	0.00263141664910509	0.103256133081937	0.0928712240648458	TBX5/CTNNA1/CAV1/GJA1	4	18	703	20973	18/20973
	GO:0031589	cell-substrate adhesion	25/703	25/406	0.00273638041564459	0.103256133081937	0.0928712240648458	PARVA/FERMT1/PDPN/NRP1/DOCK1/CD44/LAMB2/LIMS1/ILK/VAMP3/ITGA1/THY1/SRCIN1/SDC4/THBS1/ITGA2/NEDD9/CCN1/MINK1/CTNNB1/LIMCH1/TTYH1/C1QBP/CCN2/CD63	25	406	703	20973	406/20973
	GO:0007219	Notch signaling pathway	15/703	15/196	0.00258794622807573	0.103256133081937	0.0928712240648458	TSPAN14/MAGEA1/FOXA1/STAT3/ARRB1/IFT74/NIBAN2/PSEN2/SUSD5/CDH6/ZMIZ1/HIF1AN/EPN2/LLGL1/KRT19	15	196	703	20973	196/20973
	GO:0061572	actin filament bundle organization	14/703	14/177	0.00262524913745294	0.103256133081937	0.0928712240648458	NRP1/SHTN1/ARRB1/CGNL1/AIF1L/CALD1/BAIAP2L1/LIMA1/SDC4/NEDD9/LIMCH1/INPP5K/CCN2/RFLNB	14	177	703	20973	177/20973
	GO:0106106	cold-induced thermogenesis	13/703	13/159	0.00275866335032378	0.103256133081937	0.0928712240648458	DECR1/PLCL2/OMA1/KDM6B/SCD/ALPL/GATM/CAV1/DHRS7B/GJA1/ACADL/UCP1/GNAS	13	159	703	20973	159/20973
	GO:0120161	regulation of cold-induced thermogenesis	13/703	13/159	0.00275866335032378	0.103256133081937	0.0928712240648458	DECR1/PLCL2/OMA1/KDM6B/SCD/ALPL/GATM/CAV1/DHRS7B/GJA1/ACADL/UCP1/GNAS	13	159	703	20973	159/20973
	GO:0001823	mesonephros development	10/703	10/105	0.00277003440099692	0.103256133081937	0.0928712240648458	ILK/DCHS1/PAX2/SDC4/CRLF1/LZTS2/CTNNB1/SDC1/ARG2/EPCAM	10	105	703	20973	105/20973
	GO:0055081	anion homeostasis	6/703	6/43	0.00294129222046208	0.108658180128471	0.0977299642354593	CPS1/XPR1/ENPP1/SLC7A11/SLC12A7/SLC34A2	6	43	703	20973	43/20973
	GO:0033157	regulation of intracellular protein transport	17/703	17/239	0.00300196773928508	0.108658180128471	0.0977299642354593	YOD1/FERMT1/SFN/BAG3/UBL5/HCLS1/TXN/ANP32B/UBE2L3/KIF20B/YWHAE/SREBF1/NOLC1/AKAP5/MYO1C/DERL2/INPP5K	17	239	703	20973	239/20973
	GO:0001659	temperature homeostasis	15/703	15/199	0.00299137561936868	0.108658180128471	0.0977299642354593	DECR1/PLCL2/STAT3/OMA1/KDM6B/SCD/ALPL/GATM/CAV1/DHRS7B/ACADVL/GJA1/ACADL/UCP1/GNAS	15	199	703	20973	199/20973
	GO:0070252	actin-mediated cell contraction	10/703	10/106	0.00296909968960898	0.108658180128471	0.0977299642354593	PARVA/PDPN/ANK2/SHTN1/PKP2/MYL6B/DSC2/LIMCH1/CAV1/GJA1	10	106	703	20973	106/20973
	GO:1902652	secondary alcohol metabolic process	13/703	13/161	0.00307470245653706	0.110490206981314	0.0993777363460823	ABCA1/CES1/PMVK/G6PD/LIMA1/ERLIN1/IDH2/SREBF1/VLDLR/APOE/CLN6/ACADVL/ACADL	13	161	703	20973	161/20973
	GO:0046827	positive regulation of protein export from nucleus	4/703	4/19	0.00324566794911068	0.113371408432223	0.101969163097566	SFN/BAG3/ANP32B/YWHAE	4	19	703	20973	19/20973
	GO:2000641	regulation of early endosome to late endosome transport	4/703	4/19	0.00324566794911068	0.113371408432223	0.101969163097566	DENND10/MSN/SNX12/MAPK1	4	19	703	20973	19/20973
	GO:0010639	negative regulation of organelle organization	24/703	24/389	0.00321127833576685	0.113371408432223	0.101969163097566	LMNA/MAPT/TUBB4A/GCLC/FBXO5/CGNL1/ADD3/ARRB2/BUB1B/OMA1/TMOD1/LIMA1/MID1/TOM1L2/SPTBN2/GHITM/BUB1/CLU/SMG6/SMCR8/TP53/AURKB/INPP5K/ARPIN	24	389	703	20973	389/20973
	GO:0046395	carboxylic acid catabolic process	18/703	18/261	0.00320242457836856	0.113371408432223	0.101969163097566	GLDC/MCCC2/DECR1/MCCC1/ACADSB/ASRGL1/EHHADH/MLYCD/ALDH5A1/GLUD1/IVD/SHMT1/DDAH1/TYSND1/CRAT/ACADVL/ACADL/ARG2	18	261	703	20973	261/20973
	GO:0009167	purine ribonucleoside monophosphate metabolic process	6/703	6/44	0.00331094609585113	0.114848442699836	0.103297645738981	AK4/APRT/NUDT2/IMPDH1/HPRT1/PFAS	6	44	703	20973	44/20973
	GO:0070997	neuron death	26/703	26/435	0.00339302025494605	0.116883697747969	0.105128206519853	GABRA5/NQO1/CASP7/DPYSL4/INPP5A/NRP1/MAPT/GCLC/STAMBP/G6PD/SIGMAR1/ITGA1/ARRB2/TRIM2/DIABLO/CNTFR/SARM1/MAP2K4/CRLF1/PCDHGC3/CLU/SLC7A11/CTNNB1/TP53/APOE/FAS	26	435	703	20973	435/20973
	GO:0001836	release of cytochrome c from mitochondria	7/703	7/59	0.00346708173685066	0.118616940243624	0.10668712943676	SFN/LMNA/GGCT/ARRB2/GHITM/CLU/TP53	7	59	703	20973	59/20973
	GO:1901657	glycosyl compound metabolic process	9/703	9/92	0.00370519440951395	0.119285824417665	0.107288741080995	AKR1C1/TYMP/PGM2/APRT/PRTFDC1/HPRT1/NUDT1/UMPS/FUCA2	9	92	703	20973	92/20973
	GO:1902475	L-alpha-amino acid transmembrane transport	8/703	8/76	0.00388345460346525	0.119285824417665	0.107288741080995	PRAF2/SLC38A5/SLC7A3/SLC25A22/SLC43A2/SLC7A11/SLC43A1/SLC7A6	8	76	703	20973	76/20973
	GO:1900024	regulation of substrate adhesion-dependent cell spreading	7/703	7/60	0.0038139725528303	0.119285824417665	0.107288741080995	PDPN/NRP1/DOCK1/LIMS1/ILK/NEDD9/C1QBP	7	60	703	20973	60/20973
	GO:0014075	response to amine	6/703	6/45	0.00371410260069148	0.119285824417665	0.107288741080995	GLDC/NQO1/ASS1/CPS1/HPRT1/ITGA2	6	45	703	20973	45/20973
	GO:0090317	negative regulation of intracellular protein transport	6/703	6/45	0.00371410260069148	0.119285824417665	0.107288741080995	YOD1/FERMT1/BAG3/TXN/DERL2/INPP5K	6	45	703	20973	45/20973
	GO:0010758	regulation of macrophage chemotaxis	5/703	5/32	0.00396425362429076	0.119285824417665	0.107288741080995	DDT/MAPK1/MIF/THBS1/RARRES2	5	32	703	20973	32/20973
	GO:0070723	response to cholesterol	5/703	5/32	0.00396425362429076	0.119285824417665	0.107288741080995	CES1/ABCA2/PMVK/GRAMD1A/GRAMD1B	5	32	703	20973	32/20973
	GO:0006007	glucose catabolic process	4/703	4/20	0.0039507586882018	0.119285824417665	0.107288741080995	PFKFB2/PFKM/TP53/TKTL1	4	20	703	20973	20/20973
	GO:0009084	glutamine family amino acid biosynthetic process	4/703	4/20	0.0039507586882018	0.119285824417665	0.107288741080995	ASS1/PYCR2/GLUD1/ALDH18A1	4	20	703	20973	20/20973
	GO:0090201	negative regulation of release of cytochrome c from mitochondria	4/703	4/20	0.0039507586882018	0.119285824417665	0.107288741080995	LMNA/ARRB2/GHITM/CLU	4	20	703	20973	20/20973
	GO:1901659	glycosyl compound biosynthetic process	4/703	4/20	0.0039507586882018	0.119285824417665	0.107288741080995	PGM2/APRT/PRTFDC1/HPRT1	4	20	703	20973	20/20973
	GO:0000050	urea cycle	3/703	3/10	0.00377214912421674	0.119285824417665	0.107288741080995	ASS1/CPS1/ARG2	3	10	703	20973	10/20973
	GO:0002138	retinoic acid biosynthetic process	3/703	3/10	0.00377214912421674	0.119285824417665	0.107288741080995	ALDH1A2/RBP1/CRABP2	3	10	703	20973	10/20973
	GO:0006551	leucine metabolic process	3/703	3/10	0.00377214912421674	0.119285824417665	0.107288741080995	MCCC2/MCCC1/IVD	3	10	703	20973	10/20973
	GO:0030643	cellular phosphate ion homeostasis	3/703	3/10	0.00377214912421674	0.119285824417665	0.107288741080995	XPR1/ENPP1/SLC34A2	3	10	703	20973	10/20973
	GO:0033327	Leydig cell differentiation	3/703	3/10	0.00377214912421674	0.119285824417665	0.107288741080995	PLEKHA1/SGPL1/CCND1	3	10	703	20973	10/20973
	GO:0072502	cellular trivalent inorganic anion homeostasis	3/703	3/10	0.00377214912421674	0.119285824417665	0.107288741080995	XPR1/ENPP1/SLC34A2	3	10	703	20973	10/20973
	GO:0097049	motor neuron apoptotic process	3/703	3/10	0.00377214912421674	0.119285824417665	0.107288741080995	MAP2K4/CRLF1/FAS	3	10	703	20973	10/20973
	GO:0016054	organic acid catabolic process	18/703	18/265	0.00375831533408669	0.119285824417665	0.107288741080995	GLDC/MCCC2/DECR1/MCCC1/ACADSB/ASRGL1/EHHADH/MLYCD/ALDH5A1/GLUD1/IVD/SHMT1/DDAH1/TYSND1/CRAT/ACADVL/ACADL/ARG2	18	265	703	20973	265/20973
	GO:1901606	alpha-amino acid catabolic process	10/703	10/110	0.00388227858575188	0.119285824417665	0.107288741080995	GLDC/MCCC2/MCCC1/ACADSB/ASRGL1/GLUD1/IVD/SHMT1/DDAH1/ARG2	10	110	703	20973	110/20973
	GO:0006081	cellular aldehyde metabolic process	8/703	8/77	0.00420956090148655	0.121307080816507	0.109106711116348	ALDH1A2/AKR1C1/TALDO1/PNPO/ALPL/IDH2/ALDH3A2/ALDH2	8	77	703	20973	77/20973
	GO:0007062	sister chromatid cohesion	7/703	7/61	0.00418657925821082	0.121307080816507	0.109106711116348	MCMBP/CDCA5/BUB1B/SLF2/BUB1/HASPIN/CTNNB1	7	61	703	20973	61/20973
	GO:0009161	ribonucleoside monophosphate metabolic process	7/703	7/61	0.00418657925821082	0.121307080816507	0.109106711116348	AK4/APRT/NUDT2/IMPDH1/HPRT1/UMPS/PFAS	7	61	703	20973	61/20973
	GO:0090303	positive regulation of wound healing	7/703	7/61	0.00418657925821082	0.121307080816507	0.109106711116348	ANXA1/FERMT1/F3/MYLK/THBS1/PLPP3/CLDN3	7	61	703	20973	61/20973
	GO:0009126	purine nucleoside monophosphate metabolic process	6/703	6/46	0.00415254830288964	0.121307080816507	0.109106711116348	AK4/APRT/NUDT2/IMPDH1/HPRT1/PFAS	6	46	703	20973	46/20973
	GO:0097305	response to alcohol	18/703	18/268	0.00422571212453897	0.121307080816507	0.109106711116348	NQO1/MGMT/HPGD/ITPR2/CES1/ABCA2/PMVK/G6PD/TGFBR3/ADCY7/GRAMD1A/GRAMD1B/CTNNA1/SREBF1/CTNNB1/CLDN3/CCND1/UCP1	18	268	703	20973	268/20973
	GO:0051651	maintenance of location in cell	16/703	16/226	0.00410441595135821	0.121307080816507	0.109106711116348	SYNE1/ITPR2/PML/ANK2/GSTM2/CALM1/TXN/IBTK/THY1/JPH1/FTH1/RASA3/PAFAH1B1/S100A9/CAV1/APOE	16	226	703	20973	226/20973
	GO:0009063	cellular amino acid catabolic process	11/703	11/129	0.00412726904137973	0.121307080816507	0.109106711116348	GLDC/MCCC2/MCCC1/ACADSB/ASRGL1/ALDH5A1/GLUD1/IVD/SHMT1/DDAH1/ARG2	11	129	703	20973	129/20973
	GO:0030326	embryonic limb morphogenesis	11/703	11/130	0.00437622670363991	0.124200297640235	0.11170894480344	ALDH1A2/FREM2/TBX5/SALL4/FBXW4/ROR2/BMPR1A/LRP4/CTNNB1/CRABP2/GJA1	11	130	703	20973	130/20973
	GO:0035113	embryonic appendage morphogenesis	11/703	11/130	0.00437622670363991	0.124200297640235	0.11170894480344	ALDH1A2/FREM2/TBX5/SALL4/FBXW4/ROR2/BMPR1A/LRP4/CTNNB1/CRABP2/GJA1	11	130	703	20973	130/20973
	GO:0015807	L-amino acid transport	8/703	8/78	0.0045563469207707	0.127144988096367	0.114357475200525	PRAF2/SLC38A5/SLC7A3/SLC25A22/SLC43A2/SLC7A11/SLC43A1/SLC7A6	8	78	703	20973	78/20973
	GO:0071711	basement membrane organization	5/703	5/33	0.00454548434165466	0.127144988096367	0.114357475200525	FERMT1/LAMB2/PHLDB1/CAV1/SPINT2	5	33	703	20973	33/20973
	GO:0042063	gliogenesis	21/703	21/334	0.00454310357024154	0.127144988096367	0.114357475200525	ANXA1/RNF10/CD9/MAPT/LAMB2/ABCA2/STAT3/MAPK1/PLEC/ILK/CSK/ZMIZ1/PAX2/ROR2/PAFAH1B1/CLU/S100A9/CTNNB1/CDH2/LIN28A/NDN	21	334	703	20973	334/20973
	GO:2000117	negative regulation of cysteine-type endopeptidase activity	9/703	9/97	0.00526298271454038	0.130147196295233	0.117057738536021	KLF4/SFN/CD44/IGBP1/PRDX3/SERPINB9/ARRB2/PAX2/THBS1	9	97	703	20973	97/20973
	GO:0003151	outflow tract morphogenesis	8/703	8/80	0.00531532092977529	0.130147196295233	0.117057738536021	PARVA/NRP1/ILK/TGFBR3/NPY1R/DVL2/BMPR1A/CTNNB1	8	80	703	20973	80/20973
	GO:0086001	cardiac muscle cell action potential	8/703	8/80	0.00531532092977529	0.130147196295233	0.117057738536021	ANK2/CALM1/PKP2/CXADR/YWHAE/DSC2/CAV1/GJA1	8	80	703	20973	80/20973
	GO:1905521	regulation of macrophage migration	6/703	6/48	0.00514249633392902	0.130147196295233	0.117057738536021	CD9/DDT/MAPK1/MIF/THBS1/RARRES2	6	48	703	20973	48/20973
	GO:0010644	cell communication by electrical coupling	5/703	5/34	0.00518483813075493	0.130147196295233	0.117057738536021	CALM1/TBX5/PKP2/CAV1/GJA1	5	34	703	20973	34/20973
	GO:0032366	intracellular sterol transport	5/703	5/34	0.00518483813075493	0.130147196295233	0.117057738536021	ABCA1/CES1/ABCA2/GRAMD1A/GRAMD1B	5	34	703	20973	34/20973
	GO:0034405	response to fluid shear stress	5/703	5/34	0.00518483813075493	0.130147196295233	0.117057738536021	KLF4/ABCA1/ASS1/PLEC/TFPI2	5	34	703	20973	34/20973
	GO:0046825	regulation of protein export from nucleus	5/703	5/34	0.00518483813075493	0.130147196295233	0.117057738536021	SFN/BAG3/TXN/ANP32B/YWHAE	5	34	703	20973	34/20973
	GO:0055094	response to lipoprotein particle	5/703	5/34	0.00518483813075493	0.130147196295233	0.117057738536021	MYD88/ABCA1/CD9/CES1/APOE	5	34	703	20973	34/20973
	GO:0071498	cellular response to fluid shear stress	4/703	4/21	0.00475260415351784	0.130147196295233	0.117057738536021	KLF4/ASS1/PLEC/TFPI2	4	21	703	20973	21/20973
	GO:0006002	fructose 6-phosphate metabolic process	3/703	3/11	0.00505840075381407	0.130147196295233	0.117057738536021	PFKM/TALDO1/GFPT2	3	11	703	20973	11/20973
	GO:0007494	midgut development	3/703	3/11	0.00505840075381407	0.130147196295233	0.117057738536021	ALDH1A2/ASS1/CPS1	3	11	703	20973	11/20973
	GO:0016102	diterpenoid biosynthetic process	3/703	3/11	0.00505840075381407	0.130147196295233	0.117057738536021	ALDH1A2/RBP1/CRABP2	3	11	703	20973	11/20973
	GO:0033539	fatty acid beta-oxidation using acyl-CoA dehydrogenase	3/703	3/11	0.00505840075381407	0.130147196295233	0.117057738536021	IVD/ACADVL/ACADL	3	11	703	20973	11/20973
	GO:0035404	histone-serine phosphorylation	3/703	3/11	0.00505840075381407	0.130147196295233	0.117057738536021	RPS6KA5/HMGA2/AURKB	3	11	703	20973	11/20973
	GO:0039532	negative regulation of viral-induced cytoplasmic pattern recognition receptor signaling pathway	3/703	3/11	0.00505840075381407	0.130147196295233	0.117057738536021	TSPAN6/UFD1/C1QBP	3	11	703	20973	11/20973
	GO:1901844	regulation of cell communication by electrical coupling involved in cardiac conduction	3/703	3/11	0.00505840075381407	0.130147196295233	0.117057738536021	CALM1/TBX5/CAV1	3	11	703	20973	11/20973
	GO:2000392	regulation of lamellipodium morphogenesis	3/703	3/11	0.00505840075381407	0.130147196295233	0.117057738536021	PDPN/CD44/ARPIN	3	11	703	20973	11/20973
	GO:0051056	regulation of small GTPase mediated signal transduction	21/703	21/338	0.00519529325170155	0.130147196295233	0.117057738536021	ARHGAP4/ABCA1/NRP1/ARHGDIA/VAV2/AMOT/ARHGAP18/ARRB1/DENND1A/STAMBP/CGNL1/DNMBP/ARHGEF40/ARHGAP19/RASA3/ABR/APOE/SIPA1L2/PLEKHG1/RAP1GAP2/F2RL1	21	338	703	20973	338/20973
	GO:0052126	movement in host environment	16/703	16/230	0.00485653301974413	0.130147196295233	0.117057738536021	TRIM38/TRIM21/NRP1/CD55/ANPEP/FUCA2/CHMP1A/PPIA/BSG/XPR1/CXADR/EPHA2/ITGA2/EFNB3/CAV1/CLDN6	16	230	703	20973	230/20973
	GO:0030100	regulation of endocytosis	16/703	16/232	0.00527268322471202	0.130147196295233	0.117057738536021	SH3GL3/ABCA2/SNX12/ARRB1/DNAJC6/ARRB2/TOR1A/ITGA2/ATAD1/ANKFY1/CLU/CAV1/APOE/F2RL1/CD63/H1-1	16	232	703	20973	232/20973
	GO:0001764	neuron migration	13/703	13/171	0.00512710264760499	0.130147196295233	0.117057738536021	CDKL5/NRP1/TUBGCP2/SHTN1/STAT3/ZMIZ1/KIF20B/YWHAE/PAFAH1B1/CTNNB1/GJA1/CELSR1/NDN	13	171	703	20973	171/20973
	GO:0016125	sterol metabolic process	13/703	13/171	0.00512710264760499	0.130147196295233	0.117057738536021	ABCA1/CES1/CYB5R2/PMVK/G6PD/LIMA1/ERLIN1/SREBF1/VLDLR/APOE/CLN6/ACADVL/ACADL	13	171	703	20973	171/20973
	GO:0008203	cholesterol metabolic process	12/703	12/151	0.00495446897660564	0.130147196295233	0.117057738536021	ABCA1/CES1/PMVK/G6PD/LIMA1/ERLIN1/SREBF1/VLDLR/APOE/CLN6/ACADVL/ACADL	12	151	703	20973	151/20973
	GO:0030879	mammary gland development	12/703	12/152	0.00522020665225128	0.130147196295233	0.117057738536021	MGMT/PML/APRT/LBH/MAPK1/UMPS/EPHA2/HOXB9/ITGA2/CAV1/GJA1/CCND1	12	152	703	20973	152/20973
	GO:0046209	nitric oxide metabolic process	9/703	9/98	0.00562773307968818	0.130815369912891	0.117658711087555	KLF4/NQO1/ASS1/CPS1/MTARC1/DDAH1/CLU/CAV1/ARG2	9	98	703	20973	98/20973
	GO:0006893	Golgi to plasma membrane transport	7/703	7/64	0.00547052344999175	0.130815369912891	0.117658711087555	CSK/VAMP3/STXBP6/STEAP2/KRT18/RABEP1/LLGL1	7	64	703	20973	64/20973
	GO:1905517	macrophage migration	7/703	7/64	0.00547052344999175	0.130815369912891	0.117658711087555	CD9/DDT/MAPK1/MIF/ROR2/THBS1/RARRES2	7	64	703	20973	64/20973
	GO:0002089	lens morphogenesis in camera-type eye	4/703	4/22	0.00565688086109801	0.130815369912891	0.117658711087555	EPHA2/SHROOM2/NECTIN3/CTNNB1	4	22	703	20973	22/20973
	GO:0007063	regulation of sister chromatid cohesion	4/703	4/22	0.00565688086109801	0.130815369912891	0.117658711087555	CDCA5/SLF2/BUB1/CTNNB1	4	22	703	20973	22/20973
	GO:0032288	myelin assembly	4/703	4/22	0.00565688086109801	0.130815369912891	0.117658711087555	UGT8/CD9/ANK2/ABCA2	4	22	703	20973	22/20973
	GO:2000178	negative regulation of neural precursor cell proliferation	4/703	4/22	0.00565688086109801	0.130815369912891	0.117658711087555	ILK/CTNNA1/TP53/SPINT2	4	22	703	20973	22/20973
	GO:0052548	regulation of endopeptidase activity	28/703	28/497	0.00544899092744138	0.130815369912891	0.117658711087555	KLF4/MGMT/SFN/F3/PML/CD44/MAPT/AKIRIN2/ABCA2/STAT3/SERPINB6/IGBP1/PRDX3/SERPINB9/PEBP1/ANP32B/ARRB2/UACA/PAX2/DIABLO/TFPI2/THBS1/CCN1/S100A9/ATP2A3/FAS/CCN2/SPINT2	28	497	703	20973	497/20973
	GO:0006631	fatty acid metabolic process	25/703	25/429	0.00552628004039653	0.130815369912891	0.117658711087555	ANXA1/DECR1/HPGD/AKR1C1/CES1/PTGR1/ACADSB/GSTM2/CBR1/MIF/EHHADH/GGT1/MLYCD/IVD/SGPL1/ACSL6/SCD/ERLIN1/SREBF1/ALDH3A2/TYSND1/CAV1/CRAT/ACADVL/ACADL	25	429	703	20973	429/20973
	GO:0050878	regulation of body fluid levels	25/703	25/429	0.00552628004039653	0.130815369912891	0.117658711087555	CD9/SFN/F3/PDPN/VAV2/APRT/PLEC/ILK/UMPS/PPIA/HRNR/JMJD1C/TFPI2/THBS1/ITGA2/HGFAC/SLC7A11/CAV1/APOE/INPP5K/ZNF385A/F2RL1/GJA1/CCND1/GNAS	25	429	703	20973	429/20973
	GO:1990845	adaptive thermogenesis	13/703	13/173	0.00564613593241827	0.130815369912891	0.117658711087555	DECR1/PLCL2/OMA1/KDM6B/SCD/ALPL/GATM/CAV1/DHRS7B/GJA1/ACADL/UCP1/GNAS	13	173	703	20973	173/20973
	GO:0006892	post-Golgi vesicle-mediated transport	10/703	10/116	0.00565365730793106	0.130815369912891	0.117658711087555	VTI1A/CORO7/CSK/VAMP3/STXBP6/STEAP2/ANKFY1/KRT18/RABEP1/LLGL1	10	116	703	20973	116/20973
	GO:0120009	intermembrane lipid transfer	6/703	6/49	0.00569760207861642	0.131149872731286	0.117959571533034	ABCA1/ABCA3/PITPNC1/GRAMD1A/GRAMD1B/APOE	6	49	703	20973	49/20973
	GO:0006635	fatty acid beta-oxidation	8/703	8/81	0.00572921041426961	0.131272504675581	0.118069869860467	DECR1/EHHADH/MLYCD/IVD/TYSND1/CRAT/ACADVL/ACADL	8	81	703	20973	81/20973
	GO:0007272	ensheathment of neurons	12/703	12/154	0.00578568072179648	0.131361250933516	0.118149690529318	UGT8/CLDN11/RNF10/CD9/ANK2/TYMP/ABCA2/PLEC/ILK/JAM2/CLU/CTNNB1	12	154	703	20973	154/20973
	GO:0008366	axon ensheathment	12/703	12/154	0.00578568072179648	0.131361250933516	0.118149690529318	UGT8/CLDN11/RNF10/CD9/ANK2/TYMP/ABCA2/PLEC/ILK/JAM2/CLU/CTNNB1	12	154	703	20973	154/20973
	GO:0072522	purine-containing compound biosynthetic process	15/703	15/214	0.00585980889824118	0.132442287089207	0.119122002275272	AK4/PGM2/APRT/PRTFDC1/NUDT2/IMPDH1/HPRT1/NME2/PANK1/PFAS/MLYCD/ADCY7/SLC25A16/ACSL6/SHMT1	15	214	703	20973	214/20973
	GO:1990778	protein localization to cell periphery	22/703	22/364	0.0059071217590756	0.132910239579201	0.119542890790586	TSPAN14/ANK2/TSPAN33/ABCA2/CSK/VAMP3/BSG/TNIK/DCHS1/PKP2/STX8/EPHA2/SLC9A3R2/NECTIN3/KRT18/RABEP1/CDH2/CAV1/AKAP5/INPP5K/TMEM88/IFT80	22	364	703	20973	364/20973
	GO:0009116	nucleoside metabolic process	7/703	7/65	0.00595786505873196	0.133450833938862	0.120029115273392	TYMP/PGM2/APRT/PRTFDC1/HPRT1/NUDT1/UMPS	7	65	703	20973	65/20973
	GO:2001057	reactive nitrogen species metabolic process	9/703	9/99	0.0060117014936159	0.134055575717015	0.120573035595642	KLF4/NQO1/ASS1/CPS1/MTARC1/DDAH1/CLU/CAV1/ARG2	9	99	703	20973	99/20973
	GO:0008593	regulation of Notch signaling pathway	9/703	9/100	0.00641553726423809	0.135440942681629	0.121819070305082	TSPAN14/MAGEA1/STAT3/ARRB1/NIBAN2/ZMIZ1/HIF1AN/EPN2/LLGL1	9	100	703	20973	100/20973
	GO:0031397	negative regulation of protein ubiquitination	9/703	9/100	0.00641553726423809	0.135440942681629	0.121819070305082	RPL37/ARRB1/GCLC/FBXO5/PPIA/ARRB2/BUB1B/CAV1/NXN	9	100	703	20973	100/20973
	GO:0000002	mitochondrial genome maintenance	5/703	5/36	0.00664974779543871	0.135440942681629	0.121819070305082	TYMP/MGME1/TOP3A/TP53/TWNK	5	36	703	20973	36/20973
	GO:0000096	sulfur amino acid metabolic process	5/703	5/36	0.00664974779543871	0.135440942681629	0.121819070305082	CPS1/MRI1/GCLC/GGT1/SLC7A11	5	36	703	20973	36/20973
	GO:0086019	cell-cell signaling involved in cardiac conduction	5/703	5/36	0.00664974779543871	0.135440942681629	0.121819070305082	ANK2/TBX5/PKP2/CXADR/GJA1	5	36	703	20973	36/20973
	GO:0009083	branched-chain amino acid catabolic process	4/703	4/23	0.00666900454167123	0.135440942681629	0.121819070305082	MCCC2/MCCC1/ACADSB/IVD	4	23	703	20973	23/20973
	GO:0046128	purine ribonucleoside metabolic process	4/703	4/23	0.00666900454167123	0.135440942681629	0.121819070305082	PGM2/APRT/PRTFDC1/HPRT1	4	23	703	20973	23/20973
	GO:0006047	UDP-N-acetylglucosamine metabolic process	3/703	3/12	0.00657798823861677	0.135440942681629	0.121819070305082	GNE/UAP1L1/GFPT2	3	12	703	20973	12/20973
	GO:0006188	IMP biosynthetic process	3/703	3/12	0.00657798823861677	0.135440942681629	0.121819070305082	APRT/HPRT1/PFAS	3	12	703	20973	12/20973
	GO:0009113	purine nucleobase biosynthetic process	3/703	3/12	0.00657798823861677	0.135440942681629	0.121819070305082	APRT/HPRT1/SHMT1	3	12	703	20973	12/20973
	GO:0018202	peptidyl-histidine modification	3/703	3/12	0.00657798823861677	0.135440942681629	0.121819070305082	DPH6/NME2/HIF1AN	3	12	703	20973	12/20973
	GO:0019627	urea metabolic process	3/703	3/12	0.00657798823861677	0.135440942681629	0.121819070305082	ASS1/CPS1/ARG2	3	12	703	20973	12/20973
	GO:0070601	centromeric sister chromatid cohesion	3/703	3/12	0.00657798823861677	0.135440942681629	0.121819070305082	BUB1B/BUB1/CTNNB1	3	12	703	20973	12/20973
	GO:0071941	nitrogen cycle metabolic process	3/703	3/12	0.00657798823861677	0.135440942681629	0.121819070305082	ASS1/CPS1/ARG2	3	12	703	20973	12/20973
	GO:0006790	sulfur compound metabolic process	22/703	22/366	0.00628679622788527	0.135440942681629	0.121819070305082	FAR2/GLRX3/MCCC1/CPS1/PMVK/MRI1/GSTM2/GCLC/OPLAH/ABCB7/G6PD/THTPA/B3GALT6/GGT1/MLYCD/B4GALT4/ACSL6/B4GAT1/ENPP1/SLC7A11/DGAT1/TKTL1	22	366	703	20973	366/20973
	GO:0034504	protein localization to nucleus	20/703	20/322	0.00630821640014377	0.135440942681629	0.121819070305082	FERMT1/SYNE1/BAG3/LMNA/PML/STAT3/HCLS1/NXT2/ILRUN/SNUPN/TXN/WRAP53/TOR1A/TOR1AIP2/YWHAE/CTNNA1/LZTS2/NOLC1/TP53/RGPD1	20	322	703	20973	322/20973
	GO:0051146	striated muscle cell differentiation	19/703	19/302	0.00669748004852098	0.135440942681629	0.121819070305082	CD9/LMNA/PLEC/G6PD/NIBAN2/TBX5/ARRB2/CXADR/TMOD1/JAM2/KDM6B/BMPR1A/MYORG/OBSL1/PLD3/CSRP2/CDH2/SDC1/KRT19	19	302	703	20973	302/20973
	GO:0005996	monosaccharide metabolic process	18/703	18/278	0.00614207503369844	0.135440942681629	0.121819070305082	PFKFB2/PGK1/GDPGP1/PGM2/PFKM/MPI/GCLC/SORD/G6PD/FUCA2/SLC39A14/NPY1R/MLYCD/OMA1/ENPP1/TP53/INPP5K/TKTL1	18	278	703	20973	278/20973
	GO:0007599	hemostasis	17/703	17/259	0.00667931732970991	0.135440942681629	0.121819070305082	CD9/F3/PDPN/VAV2/ILK/PPIA/JMJD1C/TFPI2/THBS1/ITGA2/HGFAC/SLC7A11/CAV1/APOE/ZNF385A/F2RL1/GNAS	17	259	703	20973	259/20973
	GO:0019318	hexose metabolic process	17/703	17/259	0.00667931732970991	0.135440942681629	0.121819070305082	PFKFB2/PGK1/GDPGP1/PGM2/PFKM/MPI/SORD/G6PD/FUCA2/SLC39A14/NPY1R/MLYCD/OMA1/ENPP1/TP53/INPP5K/TKTL1	17	259	703	20973	259/20973
	GO:0030324	lung development	14/703	14/195	0.00620422295626047	0.135440942681629	0.121819070305082	ALDH1A2/ABCA3/PDPN/FOXA1/MAPK1/TBX5/BAG6/SRSF6/BMPR1A/SREBF1/SLC7A11/CTNNB1/CCN2/CELSR1	14	195	703	20973	195/20973
	GO:0055001	muscle cell development	14/703	14/196	0.00648239808919776	0.135440942681629	0.121819070305082	LMNA/ANK2/PLEC/G6PD/NIBAN2/TBX5/CXADR/TMOD1/BMPR1A/MYORG/OBSL1/CSRP2/SDC1/KRT19	14	196	703	20973	196/20973
	GO:0030216	keratinocyte differentiation	13/703	13/176	0.00650253848857709	0.135440942681629	0.121819070305082	ANXA1/SFN/PLEC/IFT74/NME2/HRNR/EPHA2/SRSF6/EXPH5/KRT8/MACROH2A2/PPL/KRT86	13	176	703	20973	176/20973
	GO:0031667	response to nutrient levels	27/703	27/482	0.0067533067499689	0.136019222645543	0.122339190190438	NQO1/MGMT/ALDH1A2/WDR45/ASS1/CPS1/BCHE/GCLC/MAPK1/PLEC/SORD/G6PD/TTC5/XPR1/PAX2/OMA1/RMI1/ALPL/ITGA2/SREBF1/DSC2/TP53/MYBBP1A/APOE/FAS/CCND1/UCP1	27	482	703	20973	482/20973
	GO:0090102	cochlea development	6/703	6/51	0.00693706908247337	0.138602640267818	0.124662782501037	GABRA5/IFT27/DCHS1/PAX2/DVL2/PAFAH1B1	6	51	703	20973	51/20973
	GO:0006006	glucose metabolic process	15/703	15/218	0.00691613676993768	0.138602640267818	0.124662782501037	PFKFB2/PGK1/GDPGP1/PGM2/PFKM/SORD/G6PD/SLC39A14/NPY1R/MLYCD/OMA1/ENPP1/TP53/INPP5K/TKTL1	15	218	703	20973	218/20973
	GO:0001707	mesoderm formation	8/703	8/84	0.00711883243867147	0.141105428695095	0.126913854838136	KLF4/HMGA2/PAX2/EPHA2/KDM6B/ITGA2/BMPR1A/GJA1	8	84	703	20973	84/20973
	GO:1901292	nucleoside phosphate catabolic process	8/703	8/84	0.00711883243867147	0.141105428695095	0.126913854838136	TYMP/HPRT1/DCTPP1/NUDT12/MLYCD/SARM1/ENPP1/ENTPD7	8	84	703	20973	84/20973
	GO:0008630	intrinsic apoptotic signaling pathway in response to DNA damage	10/703	10/120	0.00714770004920878	0.141117635358885	0.126924833825767	MAEL/SFN/PML/CD44/MIF/BAG6/EPHA2/CLU/TP53/ZNF385A	10	120	703	20973	120/20973
	GO:0003007	heart morphogenesis	17/703	17/261	0.00719130504343546	0.14141956177937	0.1271963942204	PARVA/ALDH1A2/NRP1/ILK/TBX5/TGFBR3/NPY1R/DCHS1/ZMIZ1/PKP2/COL2A1/DVL2/BMPR1A/CCN1/CTNNB1/TP53/GJA1	17	261	703	20973	261/20973
	GO:0036314	response to sterol	5/703	5/37	0.00748109744233321	0.142418736342602	0.128095077542853	CES1/ABCA2/PMVK/GRAMD1A/GRAMD1B	5	37	703	20973	37/20973
	GO:0045454	cell redox homeostasis	5/703	5/37	0.00748109744233321	0.142418736342602	0.128095077542853	NQO1/GLRX3/PRDX3/GCLC/TXN	5	37	703	20973	37/20973
	GO:0048799	animal organ maturation	5/703	5/37	0.00748109744233321	0.142418736342602	0.128095077542853	ALDH1A2/DCHS1/PAX2/RFLNB/IFT80	5	37	703	20973	37/20973
	GO:0071402	cellular response to lipoprotein particle stimulus	5/703	5/37	0.00748109744233321	0.142418736342602	0.128095077542853	MYD88/ABCA1/CD9/CES1/APOE	5	37	703	20973	37/20973
	GO:1901021	positive regulation of calcium ion transmembrane transporter activity	5/703	5/37	0.00748109744233321	0.142418736342602	0.128095077542853	ANK2/CRACR2A/GSTM2/CALM1/HSPA2	5	37	703	20973	37/20973
	GO:0009636	response to toxic substance	18/703	18/283	0.00733699898317645	0.142418736342602	0.128095077542853	NQO1/MT2A/MGMT/ASS1/CPS1/CES1/PRDX3/GSTM2/TXN/MTARC1/SLC22A5/TXNDC17/S100A9/SLC7A11/APOE/DHRS2/NXN/SDC1	18	283	703	20973	283/20973
	GO:0060541	respiratory system development	15/703	15/220	0.00749872425587674	0.142418736342602	0.128095077542853	ALDH1A2/ABCA3/ASS1/PDPN/FOXA1/MAPK1/TBX5/BAG6/SRSF6/BMPR1A/SREBF1/SLC7A11/CTNNB1/CCN2/CELSR1	15	220	703	20973	220/20973
	GO:0030323	respiratory tube development	14/703	14/199	0.00737718366990379	0.142418736342602	0.128095077542853	ALDH1A2/ABCA3/PDPN/FOXA1/MAPK1/TBX5/BAG6/SRSF6/BMPR1A/SREBF1/SLC7A11/CTNNB1/CCN2/CELSR1	14	199	703	20973	199/20973
	GO:0031099	regeneration	14/703	14/199	0.00737718366990379	0.142418736342602	0.128095077542853	ANXA3/ANXA1/KLF4/CD9/INPP5F/LAMB2/TGFBR3/PTPRU/THY1/CTNNA1/EPPK1/RTN4RL2/GJA1/CCND1	14	199	703	20973	199/20973
	GO:0016126	sterol biosynthetic process	7/703	7/68	0.00761485070226596	0.143183808286587	0.128783202943396	CES1/CYB5R2/PMVK/G6PD/ERLIN1/SREBF1/APOE	7	68	703	20973	68/20973
	GO:0006220	pyrimidine nucleotide metabolic process	6/703	6/52	0.00762500360445086	0.143183808286587	0.128783202943396	TYMP/DCTPP1/UMPS/NME2/SHMT1/ENTPD7	6	52	703	20973	52/20973
	GO:0042771	intrinsic apoptotic signaling pathway in response to DNA damage by p53 class mediator	6/703	6/52	0.00762500360445086	0.143183808286587	0.128783202943396	PML/CD44/MIF/BAG6/TP53/ZNF385A	6	52	703	20973	52/20973
	GO:1902410	mitotic cytokinetic process	4/703	4/24	0.00779411166117393	0.145267118461059	0.13065698574191	CHMP1A/CNTROB/KIF20B/CEP55	4	24	703	20973	24/20973
	GO:2000637	positive regulation of miRNA-mediated gene silencing	4/703	4/24	0.00779411166117393	0.145267118461059	0.13065698574191	STAT3/TIAL1/TP53/LIN28A	4	24	703	20973	24/20973
	GO:0051235	maintenance of location	21/703	21/351	0.00786946428665242	0.14612629781349	0.131429753768079	ABCA1/SYNE1/ITPR2/PML/CES1/ANK2/GSTM2/CALM1/TXN/IBTK/THY1/JPH1/FTH1/RASA3/SREBF1/PAFAH1B1/ENPP1/S100A9/CAV1/APOE/DGAT1	21	351	703	20973	351/20973
	GO:0017038	protein import	15/703	15/222	0.00811986082455596	0.150217425254285	0.135109419100214	FERMT1/BAG3/LMNA/PML/STAT3/HCLS1/NXT2/SNUPN/GRPEL2/TIMM21/NOLC1/CLU/TP53/APOE/RGPD1	15	222	703	20973	222/20973
	GO:0048332	mesoderm morphogenesis	8/703	8/86	0.00817725223308458	0.150401733405916	0.135275190596165	KLF4/HMGA2/PAX2/EPHA2/KDM6B/ITGA2/BMPR1A/GJA1	8	86	703	20973	86/20973
	GO:0006534	cysteine metabolic process	3/703	3/13	0.00834059662731506	0.150401733405916	0.135275190596165	GCLC/GGT1/SLC7A11	3	13	703	20973	13/20973
	GO:0009143	nucleoside triphosphate catabolic process	3/703	3/13	0.00834059662731506	0.150401733405916	0.135275190596165	DCTPP1/ENPP1/ENTPD7	3	13	703	20973	13/20973
	GO:0033700	phospholipid efflux	3/703	3/13	0.00834059662731506	0.150401733405916	0.135275190596165	ABCA1/ABCA3/APOE	3	13	703	20973	13/20973
	GO:0034616	response to laminar fluid shear stress	3/703	3/13	0.00834059662731506	0.150401733405916	0.135275190596165	KLF4/ABCA1/ASS1	3	13	703	20973	13/20973
	GO:0072182	regulation of nephron tubule epithelial cell differentiation	3/703	3/13	0.00834059662731506	0.150401733405916	0.135275190596165	PAX2/PROM1/CTNNB1	3	13	703	20973	13/20973
	GO:0098911	regulation of ventricular cardiac muscle cell action potential	3/703	3/13	0.00834059662731506	0.150401733405916	0.135275190596165	PKP2/DSC2/CAV1	3	13	703	20973	13/20973
	GO:0030258	lipid modification	16/703	16/244	0.00841847138380033	0.151259944467923	0.136047087717	DECR1/INPP5F/INPP5A/ABCA2/AGK/EHHADH/MLYCD/IVD/CERK/PLPP3/TYSND1/CRAT/APOE/INPP5K/ACADVL/ACADL	16	244	703	20973	244/20973
	GO:0032970	regulation of actin filament-based process	24/703	24/422	0.00861916705376097	0.154310894027011	0.138791190286557	ABRACL/PDPN/NRP1/ANK2/ARHGDIA/ARHGAP18/HCLS1/CGNL1/ADD3/RHOBTB3/PKP2/BAIAP2L1/TMOD1/LIMA1/SDC4/SPTBN2/DSC2/LIMCH1/CAV1/INPP5K/CCN2/F2RL1/CELSR1/ARPIN	24	422	703	20973	422/20973
	GO:0030301	cholesterol transport	8/703	8/87	0.00874869058269832	0.155514980286755	0.139874176463594	ABCA1/AKR1C1/CES1/ABCA2/LIMA1/CLU/CAV1/APOE	8	87	703	20973	87/20973
	GO:0046390	ribose phosphate biosynthetic process	14/703	14/203	0.00872005018694861	0.155514980286755	0.139874176463594	AK4/APRT/NUDT2/IMPDH1/HPRT1/G6PD/UMPS/NME2/PANK1/PFAS/MLYCD/ADCY7/SLC25A16/ACSL6	14	203	703	20973	203/20973
	GO:0010952	positive regulation of peptidase activity	15/703	15/224	0.00878128276359266	0.155540806397679	0.139897405132562	F3/PML/MAPT/AKIRIN2/STAT3/ANP32B/UACA/DIABLO/CCN1/S100A9/ATP2A3/CAV1/FAS/CCN2/CLDN3	15	224	703	20973	224/20973
	GO:0003181	atrioventricular valve morphogenesis	4/703	4/25	0.00903704418000836	0.157282354282724	0.141463798130481	TBX5/DCHS1/BMPR1A/CCN1	4	25	703	20973	25/20973
	GO:0034755	iron ion transmembrane transport	4/703	4/25	0.00903704418000836	0.157282354282724	0.141463798130481	ABCB7/SLC39A14/STEAP2/TTYH1	4	25	703	20973	25/20973
	GO:0060148	positive regulation of post-transcriptional gene silencing	4/703	4/25	0.00903704418000836	0.157282354282724	0.141463798130481	STAT3/TIAL1/TP53/LIN28A	4	25	703	20973	25/20973
	GO:1900370	positive regulation of post-transcriptional gene silencing by RNA	4/703	4/25	0.00903704418000836	0.157282354282724	0.141463798130481	STAT3/TIAL1/TP53/LIN28A	4	25	703	20973	25/20973
	GO:0010811	positive regulation of cell-substrate adhesion	10/703	10/124	0.00893026154215133	0.157282354282724	0.141463798130481	FERMT1/NRP1/DOCK1/LIMS1/ILK/THY1/SDC4/NEDD9/CCN1/C1QBP	10	124	703	20973	124/20973
	GO:0006692	prostanoid metabolic process	6/703	6/54	0.0091461017786749	0.157533718567176	0.141689881638419	ANXA1/HPGD/AKR1C1/PTGR1/CBR1/MIF	6	54	703	20973	54/20973
	GO:0006693	prostaglandin metabolic process	6/703	6/54	0.0091461017786749	0.157533718567176	0.141689881638419	ANXA1/HPGD/AKR1C1/PTGR1/CBR1/MIF	6	54	703	20973	54/20973
	GO:0044409	entry into host	14/703	14/204	0.00908419546498406	0.157533718567176	0.141689881638419	TRIM38/TRIM21/NRP1/CD55/ANPEP/FUCA2/BSG/XPR1/CXADR/EPHA2/ITGA2/EFNB3/CAV1/CLDN6	14	204	703	20973	204/20973
	GO:1903320	regulation of protein modification by small protein conjugation or removal	17/703	17/268	0.00923773201223457	0.158565193818253	0.14261761703099	RPL37/TRIM21/AMER1/ARRB1/UBE2S/GCLC/MAGEA2/FBXO5/UBE2L3/PPIA/MTA1/ARRB2/ZMIZ1/BUB1B/CTNNB1/CAV1/NXN	17	268	703	20973	268/20973
	GO:0051973	positive regulation of telomerase activity	5/703	5/39	0.00935561163564378	0.160038630548084	0.143942863954317	KLF4/MAPK1/WRAP53/CTNNB1/AURKB	5	39	703	20973	39/20973
	GO:1904427	positive regulation of calcium ion transmembrane transport	7/703	7/71	0.00958963673247731	0.163482032350594	0.147039948173929	ANK2/CRACR2A/GSTM2/CALM1/G6PD/THY1/HSPA2	7	71	703	20973	71/20973
	GO:0006913	nucleocytoplasmic transport	20/703	20/336	0.00985359587908227	0.166843089545817	0.15006296953407	FERMT1/SFN/BAG3/LMNA/PML/STAT3/HCLS1/NXT2/NXF2/SNUPN/TXN/ANP32B/YWHAE/LZTS2/ALKBH5/NCBP3/NOLC1/SMG6/TP53/RGPD1	20	336	703	20973	336/20973
	GO:0051169	nuclear transport	20/703	20/336	0.00985359587908227	0.166843089545817	0.15006296953407	FERMT1/SFN/BAG3/LMNA/PML/STAT3/HCLS1/NXT2/NXF2/SNUPN/TXN/ANP32B/YWHAE/LZTS2/ALKBH5/NCBP3/NOLC1/SMG6/TP53/RGPD1	20	336	703	20973	336/20973
	GO:0009165	nucleotide biosynthetic process	17/703	17/270	0.0099007095763446	0.167074474100815	0.150271082759028	AK4/NAPRT/APRT/NUDT2/IMPDH1/HPRT1/UMPS/NME2/NUDT12/NADK/PANK1/PFAS/MLYCD/ADCY7/SLC25A16/ACSL6/SHMT1	17	270	703	20973	270/20973
	GO:0097191	extrinsic apoptotic signaling pathway	16/703	16/249	0.0101071100382209	0.169707015634404	0.152638858379988	TNFRSF10A/BAG3/LMNA/PML/NRP1/GCLC/ITPRIP/COL2A1/DIABLO/ITM2C/THBS1/CTNNA1/KRT18/TNFRSF12A/CAV1/FAS	16	249	703	20973	249/20973
	GO:0051099	positive regulation of binding	13/703	13/186	0.0101246627946051	0.169707015634404	0.152638858379988	KLF4/PLCL2/TRIM21/NRP1/CTBP2/CALM1/EIF3E/TXN/NIBAN2/ITGA2/CTNNB1/CAV1/APOE	13	186	703	20973	186/20973
	GO:0060411	cardiac septum morphogenesis	7/703	7/72	0.010324123331144	0.169802858451111	0.152725061876474	PARVA/NRP1/TBX5/TGFBR3/BMPR1A/CCN1/TP53	7	72	703	20973	72/20973
	GO:0051894	positive regulation of focal adhesion assembly	4/703	4/26	0.0104023372744825	0.169802858451111	0.152725061876474	NRP1/LIMS1/THY1/SDC4	4	26	703	20973	26/20973
	GO:0072567	chemokine (C-X-C motif) ligand 2 production	4/703	4/26	0.0104023372744825	0.169802858451111	0.152725061876474	MYD88/KLF4/MIF/F2RL1	4	26	703	20973	26/20973
	GO:2000341	regulation of chemokine (C-X-C motif) ligand 2 production	4/703	4/26	0.0104023372744825	0.169802858451111	0.152725061876474	MYD88/KLF4/MIF/F2RL1	4	26	703	20973	26/20973
	GO:0055062	phosphate ion homeostasis	3/703	3/14	0.0103541106688459	0.169802858451111	0.152725061876474	XPR1/ENPP1/SLC34A2	3	14	703	20973	14/20973
	GO:0072350	tricarboxylic acid metabolic process	3/703	3/14	0.0103541106688459	0.169802858451111	0.152725061876474	ASS1/GLUD1/IDH2	3	14	703	20973	14/20973
	GO:0072506	trivalent inorganic anion homeostasis	3/703	3/14	0.0103541106688459	0.169802858451111	0.152725061876474	XPR1/ENPP1/SLC34A2	3	14	703	20973	14/20973
	GO:0010975	regulation of neuron projection development	25/703	25/452	0.0103596410263055	0.169802858451111	0.152725061876474	KLF4/CDKL5/ARHGAP4/INPP5F/NRP1/MAPT/SHTN1/CAMK2G/TNIK/THY1/ROR2/SRCIN1/ITPKA/ITM2C/SARM1/LRP4/EFNB3/VLDLR/PAFAH1B1/OBSL1/S100A9/RTN4RL2/CDH2/APOE/CRABP2	25	452	703	20973	452/20973
	GO:1901293	nucleoside phosphate biosynthetic process	17/703	17/272	0.0106010179679221	0.172482360748439	0.155135075217183	AK4/NAPRT/APRT/NUDT2/IMPDH1/HPRT1/UMPS/NME2/NUDT12/NADK/PANK1/PFAS/MLYCD/ADCY7/SLC25A16/ACSL6/SHMT1	17	272	703	20973	272/20973
	GO:0002088	lens development in camera-type eye	8/703	8/90	0.0106424396715793	0.172594110907592	0.155235586186946	NHS/EPHA2/TMOD1/SHROOM2/NECTIN3/SLC7A11/CTNNB1/GJA1	8	90	703	20973	90/20973
	GO:0002931	response to ischemia	6/703	6/56	0.0108723726893307	0.173506394834527	0.156056117834416	NQO1/ABRAXAS2/MLYCD/MAP2K3/TP53/CAV1	6	56	703	20973	56/20973
	GO:0010874	regulation of cholesterol efflux	6/703	6/56	0.0108723726893307	0.173506394834527	0.156056117834416	ABCA1/ABCA3/CES1/ABCA2/CAV1/APOE	6	56	703	20973	56/20973
	GO:0009913	epidermal cell differentiation	16/703	16/251	0.0108533364501022	0.173506394834527	0.156056117834416	ANXA1/KLF4/SFN/PLEC/IFT74/NME2/HRNR/EPHA2/SRSF6/PAFAH1B1/EXPH5/CTNNB1/KRT8/MACROH2A2/PPL/KRT86	16	251	703	20973	251/20973
	GO:0051701	biological process involved in interaction with host	16/703	16/251	0.0108533364501022	0.173506394834527	0.156056117834416	TRIM38/TRIM21/NRP1/CD55/ANPEP/FUCA2/CHMP1A/PPIA/BSG/XPR1/CXADR/EPHA2/ITGA2/EFNB3/CAV1/CLDN6	16	251	703	20973	251/20973
	GO:0043280	positive regulation of cysteine-type endopeptidase activity involved in apoptotic process	11/703	11/147	0.0107395899620961	0.173506394834527	0.156056117834416	F3/PML/MAPT/ANP32B/UACA/DIABLO/CCN1/S100A9/ATP2A3/FAS/CCN2	11	147	703	20973	147/20973
	GO:0044403	biological process involved in symbiotic interaction	21/703	21/363	0.0112434275684997	0.177724432609671	0.159849929588131	MYD88/TRIM38/TRIM21/NRP1/CD55/ANPEP/FUCA2/CHMP1A/PPIA/HMGA2/BSG/XPR1/CXADR/EPHA2/ITGA2/EFNB3/CAV1/APOE/INPP5K/F2RL1/CLDN6	21	363	703	20973	363/20973
	GO:0007596	blood coagulation	16/703	16/252	0.011242410472486	0.177724432609671	0.159849929588131	CD9/F3/PDPN/VAV2/ILK/PPIA/JMJD1C/TFPI2/THBS1/ITGA2/HGFAC/SLC7A11/CAV1/APOE/F2RL1/GNAS	16	252	703	20973	252/20973
	GO:0046434	organophosphate catabolic process	12/703	12/168	0.0112280899810023	0.177724432609671	0.159849929588131	INPP5F/INPP5A/TYMP/PGM2/HPRT1/DCTPP1/NUDT12/MLYCD/SARM1/ENPP1/INPP5K/ENTPD7	12	168	703	20973	168/20973
	GO:0035329	hippo signaling	5/703	5/41	0.0115303845321082	0.181685396649466	0.163412522606801	AMOT/TIAL1/TEAD3/DCHS1/MAP2K3	5	41	703	20973	41/20973
	GO:0003279	cardiac septum development	9/703	9/110	0.0116921499468788	0.182446464629788	0.164097046739357	PARVA/NRP1/ANK2/TBX5/TGFBR3/SALL4/BMPR1A/CCN1/TP53	9	110	703	20973	110/20973
	GO:0009166	nucleotide catabolic process	7/703	7/74	0.0119145365952612	0.182446464629788	0.164097046739357	TYMP/HPRT1/DCTPP1/NUDT12/MLYCD/SARM1/ENTPD7	7	74	703	20973	74/20973
	GO:0018208	peptidyl-proline modification	6/703	6/57	0.0118166756859631	0.182446464629788	0.164097046739357	PIN4/FKBP7/PPIA/P4HA2/P4HA1/P3H2	6	57	703	20973	57/20973
	GO:0051438	regulation of ubiquitin-protein transferase activity	6/703	6/57	0.0118166756859631	0.182446464629788	0.164097046739357	RPL37/UBE2S/MAGEA2/FBXO5/UBE2L3/BUB1B	6	57	703	20973	57/20973
	GO:0006541	glutamine metabolic process	4/703	4/27	0.0118942097621889	0.182446464629788	0.164097046739357	CPS1/PFAS/GLUD1/GFPT2	4	27	703	20973	27/20973
	GO:0009081	branched-chain amino acid metabolic process	4/703	4/27	0.0118942097621889	0.182446464629788	0.164097046739357	MCCC2/MCCC1/ACADSB/IVD	4	27	703	20973	27/20973
	GO:0018126	protein hydroxylation	4/703	4/27	0.0118942097621889	0.182446464629788	0.164097046739357	HIF1AN/P4HA2/P4HA1/P3H2	4	27	703	20973	27/20973
	GO:0032042	mitochondrial DNA metabolic process	4/703	4/27	0.0118942097621889	0.182446464629788	0.164097046739357	MGME1/TOP3A/TP53/TWNK	4	27	703	20973	27/20973
	GO:0043691	reverse cholesterol transport	4/703	4/27	0.0118942097621889	0.182446464629788	0.164097046739357	ABCA1/CES1/CLU/APOE	4	27	703	20973	27/20973
	GO:0006575	cellular modified amino acid metabolic process	14/703	14/211	0.0119804685482623	0.182446464629788	0.164097046739357	ASS1/FOLH1/GSTM2/GCLC/OPLAH/G6PD/GGT1/SLC25A32/SHMT1/SLC7A11/CKMT1B/GATM/CRAT/ACADL	14	211	703	20973	211/20973
	GO:0007369	gastrulation	14/703	14/211	0.0119804685482623	0.182446464629788	0.164097046739357	KLF4/AMOT/HSBP1/HMGA2/PHLDB1/PAX2/EPHA2/KDM6B/DVL2/ITGA2/BMPR1A/CTNNB1/TP53/GJA1	14	211	703	20973	211/20973
	GO:0006809	nitric oxide biosynthetic process	8/703	8/92	0.0120631957563495	0.183147911255215	0.164727945890576	KLF4/NQO1/ASS1/MTARC1/DDAH1/CLU/CAV1/ARG2	8	92	703	20973	92/20973
	GO:0015849	organic acid transport	20/703	20/343	0.0121482711057418	0.183880649009637	0.165386989088695	ANXA1/PRAF2/SLC38A5/SLC6A11/AKR1C1/SLC7A3/RBP1/MIF/SLC25A22/SLC25A32/SLC43A2/SV2A/SLC25A11/THBS1/SLC7A11/APOE/CRABP2/SLC43A1/GJA1/SLC7A6	20	343	703	20973	343/20973
	GO:0019217	regulation of fatty acid metabolic process	8/703	8/93	0.0128236489245817	0.184373604471374	0.165830365920409	ANXA1/MLYCD/ERLIN1/SREBF1/TYSND1/CAV1/ACADVL/ACADL	8	93	703	20973	93/20973
	GO:0055006	cardiac cell development	8/703	8/93	0.0128236489245817	0.184373604471374	0.165830365920409	LMNA/PLEC/G6PD/TBX5/TGFBR3/CXADR/BMPR1A/OBSL1	8	93	703	20973	93/20973
	GO:0042733	embryonic digit morphogenesis	6/703	6/58	0.0128172835666321	0.184373604471374	0.165830365920409	FREM2/ROR2/BMPR1A/LRP4/CTNNB1/GJA1	6	58	703	20973	58/20973
	GO:0048260	positive regulation of receptor-mediated endocytosis	6/703	6/58	0.0128172835666321	0.184373604471374	0.165830365920409	ARRB1/ARRB2/ATAD1/CLU/CD63/H1-1	6	58	703	20973	58/20973
	GO:0009069	serine family amino acid metabolic process	5/703	5/42	0.012736738120773	0.184373604471374	0.165830365920409	GLDC/GCLC/GGT1/SHMT1/SLC7A11	5	42	703	20973	42/20973
	GO:0044319	wound healing, spreading of cells	5/703	5/42	0.012736738120773	0.184373604471374	0.165830365920409	FERMT1/PDPN/CD44/TOR1A/CCN1	5	42	703	20973	42/20973
	GO:0086091	regulation of heart rate by cardiac conduction	5/703	5/42	0.012736738120773	0.184373604471374	0.165830365920409	ANK2/PKP2/YWHAE/DSC2/CAV1	5	42	703	20973	42/20973
	GO:0090505	epiboly involved in wound healing	5/703	5/42	0.012736738120773	0.184373604471374	0.165830365920409	FERMT1/PDPN/CD44/TOR1A/CCN1	5	42	703	20973	42/20973
	GO:1903115	regulation of actin filament-based movement	5/703	5/42	0.012736738120773	0.184373604471374	0.165830365920409	PDPN/ANK2/PKP2/DSC2/CAV1	5	42	703	20973	42/20973
	GO:0010649	regulation of cell communication by electrical coupling	3/703	3/15	0.0126247538831502	0.184373604471374	0.165830365920409	CALM1/TBX5/CAV1	3	15	703	20973	15/20973
	GO:0019511	peptidyl-proline hydroxylation	3/703	3/15	0.0126247538831502	0.184373604471374	0.165830365920409	P4HA2/P4HA1/P3H2	3	15	703	20973	15/20973
	GO:0036444	calcium import into the mitochondrion	3/703	3/15	0.0126247538831502	0.184373604471374	0.165830365920409	PSEN2/MICU1/MICU2	3	15	703	20973	15/20973
	GO:0072160	nephron tubule epithelial cell differentiation	3/703	3/15	0.0126247538831502	0.184373604471374	0.165830365920409	PAX2/PROM1/CTNNB1	3	15	703	20973	15/20973
	GO:0086069	bundle of His cell to Purkinje myocyte communication	3/703	3/15	0.0126247538831502	0.184373604471374	0.165830365920409	TBX5/PKP2/DSC2	3	15	703	20973	15/20973
	GO:0072593	reactive oxygen species metabolic process	16/703	16/255	0.0124758957739397	0.184373604471374	0.165830365920409	NQO1/AKR1C1/MAPT/PRDX3/ABCB7/G6PD/CBR1/PAX2/SH3PXD2A/THBS1/CCN1/TP53/CCN2/F2RL1/ARG2/UCP1	16	255	703	20973	255/20973
	GO:0030705	cytoskeleton-dependent intracellular transport	14/703	14/212	0.0124469740781843	0.184373604471374	0.165830365920409	BAG3/CCDC186/MAPT/TRIM58/F8A1/IFT27/HSBP1/IFT74/KIF1C/MAP1A/SPG7/PAFAH1B1/MYO1C/HOOK1	14	212	703	20973	212/20973
	GO:0007568	aging	12/703	12/171	0.0127889320280247	0.184373604471374	0.165830365920409	NQO1/ASS1/GCLC/NUDT1/DNMBP/PAX2/CTNNA1/CISD2/SREBF1/AURKB/CCN2/KRT33B	12	171	703	20973	171/20973
	GO:0051928	positive regulation of calcium ion transport	10/703	10/131	0.0128452481193269	0.184373604471374	0.165830365920409	ANK2/CRACR2A/GSTM2/CALM1/G6PD/ARRB2/MYLK/THY1/CAV1/HSPA2	10	131	703	20973	131/20973
	GO:0050817	coagulation	16/703	16/257	0.0133554717193276	0.190601660680118	0.171432039994256	CD9/F3/PDPN/VAV2/ILK/PPIA/JMJD1C/TFPI2/THBS1/ITGA2/HGFAC/SLC7A11/CAV1/APOE/F2RL1/GNAS	16	257	703	20973	257/20973
	GO:0007156	homophilic cell adhesion via plasma membrane adhesion molecules	12/703	12/172	0.013344480956023	0.190601660680118	0.171432039994256	BSG/CDH6/DCHS1/NECTIN3/PCDHGC3/OBSL1/DSC2/PCDH11X/CDH2/PCDH18/NEXN/CELSR1	12	172	703	20973	172/20973
	GO:0003171	atrioventricular valve development	4/703	4/28	0.0135165569903431	0.191241807931767	0.17200780491076	TBX5/DCHS1/BMPR1A/CCN1	4	28	703	20973	28/20973
	GO:0046037	GMP metabolic process	4/703	4/28	0.0135165569903431	0.191241807931767	0.17200780491076	APRT/IMPDH1/HPRT1/PFAS	4	28	703	20973	28/20973
	GO:0042552	myelination	11/703	11/152	0.0135534734750442	0.191241807931767	0.17200780491076	UGT8/RNF10/CD9/ANK2/TYMP/ABCA2/PLEC/ILK/JAM2/CLU/CTNNB1	11	152	703	20973	152/20973
	GO:0098876	vesicle-mediated transport to the plasma membrane	11/703	11/152	0.0135534734750442	0.191241807931767	0.17200780491076	INPP5F/SNX12/DENND1A/CSK/VAMP3/STXBP6/STEAP2/KRT18/RABEP1/AKAP5/LLGL1	11	152	703	20973	152/20973
	GO:1903036	positive regulation of response to wounding	7/703	7/76	0.0136746087841422	0.192407523596593	0.17305627958701	ANXA1/FERMT1/F3/MYLK/THBS1/PLPP3/CLDN3	7	76	703	20973	76/20973
	GO:0002062	chondrocyte differentiation	9/703	9/113	0.0137749422069064	0.19327482113342	0.173836349317198	HMGA2/SLC39A14/ZNF219/COL2A1/BMPR1A/CTNNB1/CCN2/RFLNB/IFT80	9	113	703	20973	113/20973
	GO:2001238	positive regulation of extrinsic apoptotic signaling pathway	6/703	6/59	0.0138757969813244	0.194144554402564	0.174618609807732	PML/ITM2C/THBS1/CTNNA1/TNFRSF12A/CAV1	6	59	703	20973	59/20973
	GO:0051017	actin filament bundle assembly	12/703	12/173	0.0139182706472234	0.194194865594639	0.174663860988972	NRP1/ARRB1/CGNL1/AIF1L/CALD1/BAIAP2L1/LIMA1/SDC4/NEDD9/LIMCH1/INPP5K/CCN2	12	173	703	20973	173/20973
	GO:0044331	cell-cell adhesion mediated by cadherin	5/703	5/43	0.0140256125813402	0.194605374566095	0.175033083325029	FOXA1/PTPRU/CTNND1/CDH2/EPCAM	5	43	703	20973	43/20973
	GO:0090504	epiboly	5/703	5/43	0.0140256125813402	0.194605374566095	0.175033083325029	FERMT1/PDPN/CD44/TOR1A/CCN1	5	43	703	20973	43/20973
	GO:0009132	nucleoside diphosphate metabolic process	10/703	10/133	0.0141705066500837	0.196071137720687	0.176351428437257	AK4/PFKFB2/PGK1/STAT3/PFKM/UMPS/NME2/PGAM1/ENO3/ENTPD7	10	133	703	20973	133/20973
	GO:0031960	response to corticosteroid	12/703	12/174	0.0145106650809129	0.200223127290497	0.180085834734912	ANXA3/ANXA1/ABCA3/ASS1/CPS1/BCHE/UBE2L3/PTPRU/ALPL/SDC1/CCN2/CCND1	12	174	703	20973	174/20973
	GO:0008361	regulation of cell size	13/703	13/195	0.014580922828972	0.200638318266433	0.180459268186321	CDKL5/ARHGAP4/NRP1/MAPT/MSN/VAV2/SHTN1/CCDC51/PAFAH1B1/SLC12A7/APOE/RAP1GAP2/CRABP2	13	195	703	20973	195/20973
	GO:1901214	regulation of neuron death	22/703	22/396	0.01481163655482	0.202389195555391	0.182034052290271	GABRA5/NQO1/INPP5A/NRP1/MAPT/GCLC/STAMBP/G6PD/SIGMAR1/ITGA1/ARRB2/TRIM2/CNTFR/SARM1/MAP2K4/CRLF1/PCDHGC3/CLU/SLC7A11/CTNNB1/TP53/APOE	22	396	703	20973	396/20973
	GO:0048762	mesenchymal cell differentiation	16/703	16/260	0.0147648099444617	0.202389195555391	0.182034052290271	ALDH1A2/PDPN/NRP1/FOXA1/AMER1/MAPK1/TBX5/HMGA2/TGFBR3/PHLDB1/PAX2/BMPR1A/NOLC1/CTNNB1/CDH2/RFLNB	16	260	703	20973	260/20973
	GO:0045446	endothelial cell differentiation	10/703	10/134	0.0148702371909567	0.202389195555391	0.182034052290271	MYD88/PDPN/NRP1/MSN/FOXJ2/KDM6B/COL18A1/CTNNB1/F2RL1/CLDN3	10	134	703	20973	134/20973
	GO:2000278	regulation of DNA biosynthetic process	10/703	10/134	0.0148702371909567	0.202389195555391	0.182034052290271	KLF4/MAPK1/PARP4/NIBAN2/WRAP53/ARRB2/SMG6/CTNNB1/TP53/AURKB	10	134	703	20973	134/20973
	GO:0031102	neuron projection regeneration	6/703	6/60	0.0149937774733793	0.202433986058071	0.182074338021358	KLF4/INPP5F/LAMB2/THY1/CTNNA1/RTN4RL2	6	60	703	20973	60/20973
	GO:0043388	positive regulation of DNA binding	6/703	6/60	0.0149937774733793	0.202433986058071	0.182074338021358	KLF4/CALM1/TXN/NIBAN2/ITGA2/CTNNB1	6	60	703	20973	60/20973
	GO:0030575	nuclear body organization	3/703	3/16	0.0151572193765202	0.202433986058071	0.182074338021358	PML/FAM118B/WRAP53	3	16	703	20973	16/20973
	GO:0042249	establishment of planar polarity of embryonic epithelium	3/703	3/16	0.0151572193765202	0.202433986058071	0.182074338021358	DVL2/PAFAH1B1/CELSR1	3	16	703	20973	16/20973
	GO:0071391	cellular response to estrogen stimulus	3/703	3/16	0.0151572193765202	0.202433986058071	0.182074338021358	SRA1/SERPINB9/PELP1	3	16	703	20973	16/20973
	GO:2001044	regulation of integrin-mediated signaling pathway	3/703	3/16	0.0151572193765202	0.202433986058071	0.182074338021358	LIMS1/CTNNA1/CD63	3	16	703	20973	16/20973
	GO:0009260	ribonucleotide biosynthetic process	13/703	13/196	0.0151562278651309	0.202433986058071	0.182074338021358	AK4/APRT/NUDT2/IMPDH1/HPRT1/UMPS/NME2/PANK1/PFAS/MLYCD/ADCY7/SLC25A16/ACSL6	13	196	703	20973	196/20973
	GO:1903649	regulation of cytoplasmic transport	4/703	4/29	0.0152729459623628	0.203435640218673	0.182975251557514	DENND10/MSN/SNX12/MAPK1	4	29	703	20973	29/20973
	GO:0034614	cellular response to reactive oxygen species	11/703	11/155	0.0154904924801916	0.205784600900417	0.18508796726052	ANXA1/NQO1/MAPT/PLEKHA1/PRDX3/MAPK1/TXN/SIGMAR1/PAX2/KDM6B/UCP1	11	155	703	20973	155/20973
	GO:0009743	response to carbohydrate	15/703	15/240	0.0157387229143054	0.206521910007325	0.185751122050738	NQO1/PFKFB2/CCDC186/GCLC/SLC39A14/PAX2/RMI1/MAP2K3/THBS1/SARM1/ITGA2/SREBF1/TWNK/CCN2/LIN28A	15	240	703	20973	240/20973
	GO:0010001	glial cell differentiation	15/703	15/240	0.0157387229143054	0.206521910007325	0.185751122050738	MAPT/LAMB2/ABCA2/STAT3/MAPK1/PLEC/ILK/CSK/PAX2/ROR2/CLU/S100A9/CTNNB1/CDH2/LIN28A	15	240	703	20973	240/20973
	GO:0046718	viral entry into host cell	13/703	13/197	0.0157487010020285	0.206521910007325	0.185751122050738	TRIM38/TRIM21/NRP1/CD55/ANPEP/BSG/XPR1/CXADR/EPHA2/ITGA2/EFNB3/CAV1/CLDN6	13	197	703	20973	197/20973
	GO:0046661	male sex differentiation	12/703	12/176	0.015752722264823	0.206521910007325	0.185751122050738	PLEKHA1/NUDT1/RHOBTB3/FNDC3A/SGPL1/ROR2/BMPR1A/CTNNA1/CTNNB1/SDC1/GJA1/CCND1	12	176	703	20973	176/20973
	GO:0010565	regulation of cellular ketone metabolic process	10/703	10/135	0.0155954034188337	0.206521910007325	0.185751122050738	ANXA1/CES1/MLYCD/ERLIN1/SREBF1/SLC7A11/TYSND1/CAV1/ACADVL/ACADL	10	135	703	20973	135/20973
	GO:0009185	ribonucleoside diphosphate metabolic process	9/703	9/116	0.0161203441377631	0.209378703315114	0.188320595489996	AK4/PFKFB2/PGK1/STAT3/PFKM/UMPS/PGAM1/ENO3/ENTPD7	9	116	703	20973	116/20973
	GO:0006695	cholesterol biosynthetic process	6/703	6/61	0.0161727445513977	0.209378703315114	0.188320595489996	CES1/PMVK/G6PD/ERLIN1/SREBF1/APOE	6	61	703	20973	61/20973
	GO:1902653	secondary alcohol biosynthetic process	6/703	6/61	0.0161727445513977	0.209378703315114	0.188320595489996	CES1/PMVK/G6PD/ERLIN1/SREBF1/APOE	6	61	703	20973	61/20973
	GO:0032535	regulation of cellular component size	21/703	21/376	0.0161145406640175	0.209378703315114	0.188320595489996	CDKL5/ARHGAP4/NRP1/MAPT/MSN/VAV2/SHTN1/ARHGAP18/HCLS1/ADD3/CCDC51/BAIAP2L1/TMOD1/LIMA1/SPTBN2/PAFAH1B1/SLC12A7/APOE/RAP1GAP2/F2RL1/CRABP2	21	376	703	20973	376/20973
	GO:0051384	response to glucocorticoid	11/703	11/156	0.0161802161120388	0.209378703315114	0.188320595489996	ANXA3/ANXA1/ABCA3/ASS1/CPS1/BCHE/UBE2L3/PTPRU/ALPL/SDC1/CCND1	11	156	703	20973	156/20973
	GO:0048017	inositol lipid-mediated signaling	13/703	13/198	0.0163586516309407	0.211140736166793	0.18990541319422	INPP5F/PLCL2/PLEKHA1/HCLS1/STAMBP/PLCH1/ROR2/PLCB4/CEP55/PLD2/C1QBP/CA8/F2RL1	13	198	703	20973	198/20973
	GO:0051924	regulation of calcium ion transport	17/703	17/286	0.0166687098210328	0.214588158649637	0.193006113717222	PML/ANK2/CRACR2A/GSTM2/CALM1/G6PD/PSEN2/CAMK2G/ARRB2/MYLK/THY1/JPH1/YWHAE/CTNNB1/CAV1/INPP5K/HSPA2	17	286	703	20973	286/20973
	GO:0045773	positive regulation of axon extension	5/703	5/45	0.0168599359181745	0.216015600352083	0.194289991528938	CDKL5/NRP1/MAPT/SHTN1/PAFAH1B1	5	45	703	20973	45/20973
	GO:0072659	protein localization to plasma membrane	18/703	18/309	0.0169093292768097	0.216015600352083	0.194289991528938	TSPAN14/ANK2/TSPAN33/CSK/VAMP3/BSG/TNIK/DCHS1/PKP2/STX8/EPHA2/SLC9A3R2/NECTIN3/KRT18/CDH2/AKAP5/INPP5K/TMEM88	18	309	703	20973	309/20973
	GO:0050768	negative regulation of neurogenesis	11/703	11/157	0.0168926828532574	0.216015600352083	0.194289991528938	RNF10/ARHGAP4/NRP1/THY1/BMPR1A/LRP4/EFNB3/CTNNA1/CTNNB1/TP53/LIN28A	11	157	703	20973	157/20973
	GO:0002021	response to dietary excess	4/703	4/30	0.0171666124932908	0.217632561939055	0.195744328403327	OMA1/RMI1/APOE/UCP1	4	30	703	20973	30/20973
	GO:0002092	positive regulation of receptor internalization	4/703	4/30	0.0171666124932908	0.217632561939055	0.195744328403327	ARRB1/ARRB2/ATAD1/CD63	4	30	703	20973	30/20973
	GO:0019674	NAD metabolic process	4/703	4/30	0.0171666124932908	0.217632561939055	0.195744328403327	NQO1/PFKM/NADK/TP53	4	30	703	20973	30/20973
	GO:0007626	locomotory behavior	13/703	13/200	0.0176322202352795	0.222969468544863	0.200544479584737	INPP5F/PAK6/ABCA2/HPRT1/MTA1/NPY1R/ARRB2/TMOD1/EFNB3/PAFAH1B1/APOE/CLN6/ZNF385A	13	200	703	20973	200/20973
	GO:0006750	glutathione biosynthetic process	3/703	3/17	0.0179547928296015	0.223095000457362	0.200657386218223	GCLC/GGT1/SLC7A11	3	17	703	20973	17/20973
	GO:0042532	negative regulation of tyrosine phosphorylation of STAT protein	3/703	3/17	0.0179547928296015	0.223095000457362	0.200657386218223	PARP14/INPP5F/CAV1	3	17	703	20973	17/20973
	GO:0045869	negative regulation of single stranded viral RNA replication via double stranded DNA intermediate	3/703	3/17	0.0179547928296015	0.223095000457362	0.200657386218223	RESF1/HMGA2/INPP5K	3	17	703	20973	17/20973
	GO:0070365	hepatocyte differentiation	3/703	3/17	0.0179547928296015	0.223095000457362	0.200657386218223	ANXA1/CPS1/ITGA2	3	17	703	20973	17/20973
	GO:0072673	lamellipodium morphogenesis	3/703	3/17	0.0179547928296015	0.223095000457362	0.200657386218223	PDPN/CD44/ARPIN	3	17	703	20973	17/20973
	GO:1902166	negative regulation of intrinsic apoptotic signaling pathway in response to DNA damage by p53 class mediator	3/703	3/17	0.0179547928296015	0.223095000457362	0.200657386218223	CD44/MIF/ZNF385A	3	17	703	20973	17/20973
	GO:0099173	postsynapse organization	12/703	12/179	0.017764412438841	0.223095000457362	0.200657386218223	CDKL5/NRP1/FARP1/SRCIN1/ITPKA/SPTBN2/LRP4/PAFAH1B1/SLC7A11/CDH2/APOE/INA	12	179	703	20973	179/20973
	GO:0007044	cell-substrate junction assembly	8/703	8/99	0.018140720020188	0.224289347774354	0.201731612939454	NRP1/LIMS1/PLEC/THY1/SDC4/THBS1/ITGA2/LIMCH1	8	99	703	20973	99/20973
	GO:0097306	cellular response to alcohol	8/703	8/99	0.018140720020188	0.224289347774354	0.201731612939454	ITPR2/CES1/ADCY7/GRAMD1A/GRAMD1B/CTNNA1/CTNNB1/UCP1	8	99	703	20973	99/20973
	GO:0061005	cell differentiation involved in kidney development	6/703	6/63	0.0187194897886449	0.230873707393287	0.207653755472219	LAMB2/AMER1/PAX2/PROM1/CTNNB1/PODXL	6	63	703	20973	63/20973
	GO:0098742	cell-cell adhesion via plasma-membrane adhesion molecules	17/703	17/290	0.0188207391662072	0.23155071954484	0.208262677628655	CLDN11/KLF4/BSG/CDH6/DCHS1/CXADR/NECTIN3/PCDHGC3/OBSL1/DSC2/PCDH11X/CDH2/PCDH18/NEXN/CLDN3/CELSR1/CLDN6	17	290	703	20973	290/20973
	GO:0006734	NADH metabolic process	4/703	4/31	0.0192004601990799	0.232922560307692	0.209496546524046	NQO1/PFKM/NUDT12/TP53	4	31	703	20973	31/20973
	GO:0008299	isoprenoid biosynthetic process	4/703	4/31	0.0192004601990799	0.232922560307692	0.209496546524046	ALDH1A2/RBP1/PMVK/CRABP2	4	31	703	20973	31/20973
	GO:0032682	negative regulation of chemokine production	4/703	4/31	0.0192004601990799	0.232922560307692	0.209496546524046	KLF4/EPHA2/F2RL1/ARG2	4	31	703	20973	31/20973
	GO:0150117	positive regulation of cell-substrate junction organization	4/703	4/31	0.0192004601990799	0.232922560307692	0.209496546524046	NRP1/LIMS1/THY1/SDC4	4	31	703	20973	31/20973
	GO:0008016	regulation of heart contraction	14/703	14/224	0.0192120310003542	0.232922560307692	0.209496546524046	GLRX3/ANK2/GSTM2/CALM1/TBX5/PKP2/CXADR/YWHAE/SREBF1/DSC2/ATP2A3/CAV1/CCN2/GJA1	14	224	703	20973	224/20973
	GO:0000910	cytokinesis	12/703	12/181	0.0192088081603284	0.232922560307692	0.209496546524046	CALM1/PLEC/STAMBP/CHMP1A/CNTROB/KIF20B/CEP55/LZTS2/AURKB/MYH10/CENPV/TTC19	12	181	703	20973	181/20973
	GO:0016055	Wnt signaling pathway	25/703	25/479	0.0199111716982893	0.240278241866856	0.216112435864864	KLF4/FERMT1/AMER1/ILK/TNIK/PTPRU/FBXW4/ROR2/DVL2/LRP4/DAAM1/LZTS2/CTNND1/MCC/CTNNB1/PLPP3/CDH2/CAV1/APOE/NXN/SDC1/TMEM88/CCND1/CELSR1/IFT80	25	479	703	20973	479/20973
	GO:0009152	purine ribonucleotide biosynthetic process	12/703	12/182	0.0199630571320812	0.240278241866856	0.216112435864864	AK4/APRT/NUDT2/IMPDH1/HPRT1/NME2/PANK1/PFAS/MLYCD/ADCY7/SLC25A16/ACSL6	12	182	703	20973	182/20973
	GO:1901136	carbohydrate derivative catabolic process	12/703	12/182	0.0199630571320812	0.240278241866856	0.216112435864864	CD44/TYMP/PGM2/HPRT1/NUDT1/DCTPP1/FUCA2/MLYCD/FBXO17/CEMIP2/MANBA/ENTPD7	12	182	703	20973	182/20973
	GO:0055117	regulation of cardiac muscle contraction	7/703	7/82	0.020062011034836	0.240311139374115	0.216142024729724	ANK2/GSTM2/CALM1/PKP2/DSC2/CAV1/CCN2	7	82	703	20973	82/20973
	GO:0048246	macrophage chemotaxis	5/703	5/47	0.0200502766415372	0.240311139374115	0.216142024729724	DDT/MAPK1/MIF/THBS1/RARRES2	5	47	703	20973	47/20973
	GO:0006672	ceramide metabolic process	9/703	9/121	0.0206603112196097	0.244168006949246	0.219610990708473	UGT8/ABCA2/AGK/B4GALT4/SGPL1/CERK/CCN1/PLPP3/CLN6	9	121	703	20973	121/20973
	GO:1901890	positive regulation of cell junction assembly	9/703	9/121	0.0206603112196097	0.244168006949246	0.219610990708473	NRP1/LIMS1/TBX5/EPHA2/THY1/SDC4/LRRN1/CAV1/CLDN3	9	121	703	20973	121/20973
	GO:0006390	mitochondrial transcription	3/703	3/18	0.0210194680657009	0.244168006949246	0.219610990708473	TFAM/MTERF2/TWNK	3	18	703	20973	18/20973
	GO:0009226	nucleotide-sugar biosynthetic process	3/703	3/18	0.0210194680657009	0.244168006949246	0.219610990708473	MPI/UAP1L1/GFPT2	3	18	703	20973	18/20973
	GO:0016114	terpenoid biosynthetic process	3/703	3/18	0.0210194680657009	0.244168006949246	0.219610990708473	ALDH1A2/RBP1/CRABP2	3	18	703	20973	18/20973
	GO:0030002	cellular anion homeostasis	3/703	3/18	0.0210194680657009	0.244168006949246	0.219610990708473	XPR1/ENPP1/SLC34A2	3	18	703	20973	18/20973
	GO:0035372	protein localization to microtubule	3/703	3/18	0.0210194680657009	0.244168006949246	0.219610990708473	MID1/MAP1A/KIF20B	3	18	703	20973	18/20973
	GO:0048532	anatomical structure arrangement	3/703	3/18	0.0210194680657009	0.244168006949246	0.219610990708473	NRP1/PAX2/BMPR1A	3	18	703	20973	18/20973
	GO:2000696	regulation of epithelial cell differentiation involved in kidney development	3/703	3/18	0.0210194680657009	0.244168006949246	0.219610990708473	PAX2/PROM1/CTNNB1	3	18	703	20973	18/20973
	GO:0198738	cell-cell signaling by wnt	25/703	25/481	0.0208289637290719	0.244168006949246	0.219610990708473	KLF4/FERMT1/AMER1/ILK/TNIK/PTPRU/FBXW4/ROR2/DVL2/LRP4/DAAM1/LZTS2/CTNND1/MCC/CTNNB1/PLPP3/CDH2/CAV1/APOE/NXN/SDC1/TMEM88/CCND1/CELSR1/IFT80	25	481	703	20973	481/20973
	GO:0006865	amino acid transport	11/703	11/162	0.0208110462887882	0.244168006949246	0.219610990708473	PRAF2/SLC38A5/SLC6A11/SLC7A3/SLC25A22/SLC43A2/SV2A/SLC7A11/SLC43A1/GJA1/SLC7A6	11	162	703	20973	162/20973
	GO:0051961	negative regulation of nervous system development	11/703	11/162	0.0208110462887882	0.244168006949246	0.219610990708473	RNF10/ARHGAP4/NRP1/THY1/BMPR1A/LRP4/EFNB3/CTNNA1/CTNNB1/TP53/LIN28A	11	162	703	20973	162/20973
	GO:0090398	cellular senescence	10/703	10/141	0.0205095738231405	0.244168006949246	0.219610990708473	PML/MAGEA2/FBXO5/HMGA2/MAP2K3/BMPR1A/MAP2K4/HMGA1/TP53/ARG2	10	141	703	20973	141/20973
	GO:0010950	positive regulation of endopeptidase activity	13/703	13/205	0.0211435148351119	0.245039110444046	0.220394483615234	F3/PML/MAPT/AKIRIN2/STAT3/ANP32B/UACA/DIABLO/CCN1/S100A9/ATP2A3/FAS/CCN2	13	205	703	20973	205/20973
	GO:0006165	nucleoside diphosphate phosphorylation	8/703	8/102	0.0213209456406098	0.24603322669582	0.221288617362154	AK4/PFKFB2/PGK1/STAT3/PFKM/NME2/PGAM1/ENO3	8	102	703	20973	102/20973
	GO:0010165	response to X-ray	4/703	4/32	0.0213770611383355	0.24603322669582	0.221288617362154	ANXA1/HMGA2/TP53/CCND1	4	32	703	20973	32/20973
	GO:1902230	negative regulation of intrinsic apoptotic signaling pathway in response to DNA damage	4/703	4/32	0.0213770611383355	0.24603322669582	0.221288617362154	CD44/MIF/CLU/ZNF385A	4	32	703	20973	32/20973
	GO:0002011	morphogenesis of an epithelial sheet	6/703	6/65	0.0215272461527842	0.247192171340591	0.22233100200867	FERMT1/PDPN/CD44/TOR1A/DVL2/CCN1	6	65	703	20973	65/20973
	GO:0051261	protein depolymerization	9/703	9/122	0.021668588320957	0.247294951460628	0.222423445094349	SH3GL3/DNAJC6/ADD3/TMOD1/LIMA1/MID1/MAP1A/SPTBN2/F2RL1	9	122	703	20973	122/20973
	GO:0021762	substantia nigra development	5/703	5/48	0.0217837394680033	0.247294951460628	0.222423445094349	CALM1/G6PD/GLUD1/YWHAE/INA	5	48	703	20973	48/20973
	GO:0042398	cellular modified amino acid biosynthetic process	5/703	5/48	0.0217837394680033	0.247294951460628	0.222423445094349	GCLC/GGT1/SLC7A11/CKMT1B/GATM	5	48	703	20973	48/20973
	GO:0045839	negative regulation of mitotic nuclear division	5/703	5/48	0.0217837394680033	0.247294951460628	0.222423445094349	FBXO5/BUB1B/TOM1L2/BUB1/AURKB	5	48	703	20973	48/20973
	GO:0035051	cardiocyte differentiation	11/703	11/163	0.0216688612827304	0.247294951460628	0.222423445094349	LMNA/MAPK1/PLEC/G6PD/TBX5/TGFBR3/ARRB2/CXADR/KDM6B/BMPR1A/OBSL1	11	163	703	20973	163/20973
	GO:0042692	muscle cell differentiation	22/703	22/412	0.0221579424451993	0.250404802067354	0.225220524782355	CD9/SYNE1/LMNA/ANK2/PLEC/G6PD/NIBAN2/TBX5/ARRB2/CXADR/TMOD1/JAM2/KDM6B/BMPR1A/MYORG/OBSL1/PLD3/CTNNB1/CSRP2/CDH2/SDC1/KRT19	22	412	703	20973	412/20973
	GO:2001233	regulation of apoptotic signaling pathway	22/703	22/412	0.0221579424451993	0.250404802067354	0.225220524782355	LMNA/PML/NRP1/CD44/GCLC/MIF/PPIA/ARRB2/ITPRIP/COL2A1/ITM2C/THBS1/GHITM/CTNNA1/CLU/S100A9/TNFRSF12A/CTNNB1/TP53/CAV1/FAS/ZNF385A	22	412	703	20973	412/20973
	GO:0046939	nucleotide phosphorylation	8/703	8/103	0.0224635253360091	0.250458279136977	0.225268623435355	AK4/PFKFB2/PGK1/STAT3/PFKM/NME2/PGAM1/ENO3	8	103	703	20973	103/20973
	GO:1990830	cellular response to leukemia inhibitory factor	8/703	8/103	0.0224635253360091	0.250458279136977	0.225268623435355	GLDC/KLF4/PML/CTBP2/GFPT2/SHMT1/NCL/INA	8	103	703	20973	103/20973
	GO:0001704	formation of primary germ layer	10/703	10/143	0.0223743587292939	0.250458279136977	0.225268623435355	KLF4/HSBP1/HMGA2/PAX2/EPHA2/KDM6B/ITGA2/BMPR1A/CTNNB1/GJA1	10	143	703	20973	143/20973
	GO:0006997	nucleus organization	10/703	10/143	0.0223743587292939	0.250458279136977	0.225268623435355	SYNE1/LMNA/PML/PLEC/CHMP1A/FAM118B/WRAP53/TOR1A/NOLC1/PAFAH1B1	10	143	703	20973	143/20973
	GO:0010977	negative regulation of neuron projection development	10/703	10/143	0.0223743587292939	0.250458279136977	0.225268623435355	ARHGAP4/INPP5F/NRP1/THY1/ITM2C/LRP4/EFNB3/PAFAH1B1/RTN4RL2/APOE	10	143	703	20973	143/20973
	GO:0071621	granulocyte chemotaxis	10/703	10/143	0.0223743587292939	0.250458279136977	0.225268623435355	ANXA1/MAPK1/PPIA/BSG/ITGA1/CXADR/THBS1/S100A9/RARRES2/C1QBP	10	143	703	20973	143/20973
	GO:1905039	carboxylic acid transmembrane transport	11/703	11/164	0.0225523530975144	0.25088864971511	0.225655709811725	PRAF2/SLC38A5/SLC7A3/SLC25A22/SLC25A32/SLC43A2/SLC25A11/THBS1/SLC7A11/SLC43A1/SLC7A6	11	164	703	20973	164/20973
	GO:0030858	positive regulation of epithelial cell differentiation	6/703	6/66	0.0230322813607997	0.254527091586713	0.22892821809011	SFN/NME2/PAX2/PROM1/CTNNB1/MACROH2A2	6	66	703	20973	66/20973
	GO:0050732	negative regulation of peptidyl-tyrosine phosphorylation	6/703	6/66	0.0230322813607997	0.254527091586713	0.22892821809011	PARP14/INPP5F/IBTK/THY1/SRCIN1/CAV1	6	66	703	20973	66/20973
	GO:0098900	regulation of action potential	6/703	6/66	0.0230322813607997	0.254527091586713	0.22892821809011	ANK2/CALM1/PKP2/CXADR/DSC2/CAV1	6	66	703	20973	66/20973
	GO:1990823	response to leukemia inhibitory factor	8/703	8/104	0.0236485942005736	0.255118095689006	0.229459782393062	GLDC/KLF4/PML/CTBP2/GFPT2/SHMT1/NCL/INA	8	104	703	20973	104/20973
	GO:0030261	chromosome condensation	5/703	5/49	0.0236117096258881	0.255118095689006	0.229459782393062	CHMP1A/CDCA5/HMGA2/H1-6/H1-1	5	49	703	20973	49/20973
	GO:0090199	regulation of release of cytochrome c from mitochondria	5/703	5/49	0.0236117096258881	0.255118095689006	0.229459782393062	LMNA/ARRB2/GHITM/CLU/TP53	5	49	703	20973	49/20973
	GO:0008156	negative regulation of DNA replication	4/703	4/33	0.0236986579378777	0.255118095689006	0.229459782393062	SLFN11/S100A11/FBXO5/TP53	4	33	703	20973	33/20973
	GO:0046320	regulation of fatty acid oxidation	4/703	4/33	0.0236986579378777	0.255118095689006	0.229459782393062	MLYCD/TYSND1/ACADVL/ACADL	4	33	703	20973	33/20973
	GO:0072337	modified amino acid transport	4/703	4/33	0.0236986579378777	0.255118095689006	0.229459782393062	SLC22A5/SLC25A32/SLC7A11/GJA1	4	33	703	20973	33/20973
	GO:0072525	pyridine-containing compound biosynthetic process	4/703	4/33	0.0236986579378777	0.255118095689006	0.229459782393062	NAPRT/NUDT12/NADK/PNPO	4	33	703	20973	33/20973
	GO:1904951	positive regulation of establishment of protein localization	19/703	19/344	0.023618289426314	0.255118095689006	0.229459782393062	PFKFB2/SFN/BAG3/UBL5/HCLS1/PFKM/ANP32B/UBE2L3/PPIA/WRAP53/GLUD1/MYRIP/KIF20B/YWHAE/EXPH5/AKAP5/MYH10/MYO1C/F2RL1	19	344	703	20973	344/20973
	GO:0007163	establishment or maintenance of cell polarity	14/703	14/230	0.0234936189546646	0.255118095689006	0.229459782393062	PARVA/FERMT1/LMNA/MSN/SHTN1/AMOT/ILK/RHOBTB3/KIF20B/CTNNA1/PAFAH1B1/LLGL1/GJA1/SPINT2	14	230	703	20973	230/20973
	GO:0050770	regulation of axonogenesis	11/703	11/165	0.0234619263133474	0.255118095689006	0.229459782393062	CDKL5/ARHGAP4/NRP1/MAPT/SHTN1/THY1/LRP4/EFNB3/PAFAH1B1/CDH2/CRABP2	11	165	703	20973	165/20973
	GO:1903825	organic acid transmembrane transport	11/703	11/165	0.0234619263133474	0.255118095689006	0.229459782393062	PRAF2/SLC38A5/SLC7A3/SLC25A22/SLC25A32/SLC43A2/SLC25A11/THBS1/SLC7A11/SLC43A1/SLC7A6	11	165	703	20973	165/20973
	GO:2000377	regulation of reactive oxygen species metabolic process	11/703	11/165	0.0234619263133474	0.255118095689006	0.229459782393062	AKR1C1/MAPT/ABCB7/G6PD/CBR1/PAX2/THBS1/TP53/F2RL1/ARG2/UCP1	11	165	703	20973	165/20973
	GO:0010759	positive regulation of macrophage chemotaxis	3/703	3/19	0.0243520555875615	0.255388458407611	0.229702953581726	MAPK1/THBS1/RARRES2	3	19	703	20973	19/20973
	GO:0019184	nonribosomal peptide biosynthetic process	3/703	3/19	0.0243520555875615	0.255388458407611	0.229702953581726	GCLC/GGT1/SLC7A11	3	19	703	20973	19/20973
	GO:0030903	notochord development	3/703	3/19	0.0243520555875615	0.255388458407611	0.229702953581726	ID3/COL2A1/EPHA2	3	19	703	20973	19/20973
	GO:0043173	nucleotide salvage	3/703	3/19	0.0243520555875615	0.255388458407611	0.229702953581726	NAPRT/APRT/HPRT1	3	19	703	20973	19/20973
	GO:0046040	IMP metabolic process	3/703	3/19	0.0243520555875615	0.255388458407611	0.229702953581726	APRT/HPRT1/PFAS	3	19	703	20973	19/20973
	GO:0055093	response to hyperoxia	3/703	3/19	0.0243520555875615	0.255388458407611	0.229702953581726	PDPN/CAV1/FAS	3	19	703	20973	19/20973
	GO:0060977	coronary vasculature morphogenesis	3/703	3/19	0.0243520555875615	0.255388458407611	0.229702953581726	NRP1/TBX5/TGFBR3	3	19	703	20973	19/20973
	GO:0072189	ureter development	3/703	3/19	0.0243520555875615	0.255388458407611	0.229702953581726	ALDH1A2/PAX2/LZTS2	3	19	703	20973	19/20973
	GO:1902165	regulation of intrinsic apoptotic signaling pathway in response to DNA damage by p53 class mediator	3/703	3/19	0.0243520555875615	0.255388458407611	0.229702953581726	CD44/MIF/ZNF385A	3	19	703	20973	19/20973
	GO:0051348	negative regulation of transferase activity	17/703	17/299	0.0244395761999676	0.255388458407611	0.229702953581726	SFN/RPL37/MAPT/PRDX3/PLEC/CSK/FBXO5/PPIA/IBTK/BUB1B/THY1/SRCIN1/SMCR8/TP53/CAV1/APOE/INPP5K	17	299	703	20973	299/20973
	GO:0002832	negative regulation of response to biotic stimulus	13/703	13/209	0.0243092541114855	0.255388458407611	0.229702953581726	TSPAN6/PARP14/TRIM38/TRIM21/STAT2/SERPINB9/ILRUN/UFD1/HLA-B/ARRB2/MICB/C1QBP/ARG2	13	209	703	20973	209/20973
	GO:0021915	neural tube development	11/703	11/166	0.0243979809460569	0.255388458407611	0.229702953581726	ALDH1A2/FOXA1/DCHS1/SALL4/PAX2/EPHA2/SDC4/DVL2/KIF20B/CELSR1/SPINT2	11	166	703	20973	166/20973
	GO:0098754	detoxification	11/703	11/166	0.0243979809460569	0.255388458407611	0.229702953581726	NQO1/MT2A/PRDX3/GSTM2/TXN/MTARC1/SLC22A5/TXNDC17/S100A9/APOE/NXN	11	166	703	20973	166/20973
	GO:2001056	positive regulation of cysteine-type endopeptidase activity	11/703	11/166	0.0243979809460569	0.255388458407611	0.229702953581726	F3/PML/MAPT/ANP32B/UACA/DIABLO/CCN1/S100A9/ATP2A3/FAS/CCN2	11	166	703	20973	166/20973
	GO:0030193	regulation of blood coagulation	6/703	6/67	0.0246063923633611	0.256594843121062	0.230788007047193	CD9/F3/THBS1/CAV1/APOE/F2RL1	6	67	703	20973	67/20973
	GO:0048259	regulation of receptor-mediated endocytosis	9/703	9/125	0.0249048083330862	0.257555937109246	0.231652439720196	SH3GL3/ABCA2/ARRB1/DNAJC6/ARRB2/ATAD1/CLU/CD63/H1-1	9	125	703	20973	125/20973
	GO:0042147	retrograde transport, endosome to Golgi	8/703	8/105	0.0248768690819605	0.257555937109246	0.231652439720196	VTI1A/SNX12/TBC1D17/HEATR5A/VAMP3/TMEM87A/RHOBTB3/ANKFY1	8	105	703	20973	105/20973
	GO:0150115	cell-substrate junction organization	8/703	8/105	0.0248768690819605	0.257555937109246	0.231652439720196	NRP1/LIMS1/PLEC/THY1/SDC4/THBS1/ITGA2/LIMCH1	8	105	703	20973	105/20973
	GO:0008544	epidermis development	21/703	21/393	0.024828102677198	0.257555937109246	0.231652439720196	ANXA1/KLF4/FERMT1/SFN/PLEC/IFT74/NME2/HRNR/EPHA2/SRSF6/LRP4/PAFAH1B1/EXPH5/CTNNB1/KRT8/ALDH3A2/MACROH2A2/CCN2/CRABP2/PPL/KRT86	21	393	703	20973	393/20973
	GO:0022406	membrane docking	7/703	7/86	0.0253261499462773	0.261372146656312	0.235084836821904	PDZD8/MSN/CTBP2/CALM1/PSEN2/VAMP3/STX8	7	86	703	20973	86/20973
	GO:0018198	peptidyl-cysteine modification	5/703	5/50	0.0255357667386726	0.262450935925246	0.236055127660071	PRDX3/ZDHHC6/TXN/ZDHHC18/S100A9	5	50	703	20973	50/20973
	GO:0032365	intracellular lipid transport	5/703	5/50	0.0255357667386726	0.262450935925246	0.236055127660071	ABCA1/CES1/ABCA2/GRAMD1A/GRAMD1B	5	50	703	20973	50/20973
	GO:0051893	regulation of focal adhesion assembly	6/703	6/68	0.0262507351047574	0.265370552041505	0.238681105550423	NRP1/LIMS1/THY1/SDC4/THBS1/LIMCH1	6	68	703	20973	68/20973
	GO:0090109	regulation of cell-substrate junction assembly	6/703	6/68	0.0262507351047574	0.265370552041505	0.238681105550423	NRP1/LIMS1/THY1/SDC4/THBS1/LIMCH1	6	68	703	20973	68/20973
	GO:0098930	axonal transport	6/703	6/68	0.0262507351047574	0.265370552041505	0.238681105550423	MAPT/HSBP1/KIF1C/MAP1A/SPG7/PAFAH1B1	6	68	703	20973	68/20973
	GO:0009225	nucleotide-sugar metabolic process	4/703	4/34	0.0261671672454941	0.265370552041505	0.238681105550423	GNE/MPI/UAP1L1/GFPT2	4	34	703	20973	34/20973
	GO:0019362	pyridine nucleotide metabolic process	4/703	4/34	0.0261671672454941	0.265370552041505	0.238681105550423	NAPRT/NUDT12/NADK/SARM1	4	34	703	20973	34/20973
	GO:0035115	embryonic forelimb morphogenesis	4/703	4/34	0.0261671672454941	0.265370552041505	0.238681105550423	ALDH1A2/TBX5/CTNNB1/CRABP2	4	34	703	20973	34/20973
	GO:0046496	nicotinamide nucleotide metabolic process	4/703	4/34	0.0261671672454941	0.265370552041505	0.238681105550423	NAPRT/NUDT12/NADK/SARM1	4	34	703	20973	34/20973
	GO:0055088	lipid homeostasis	12/703	12/189	0.0258737023603168	0.265370552041505	0.238681105550423	ABCA1/ABCA3/AKR1C1/CES1/RBP1/ABCA2/TLCD4/LIMA1/GRAMD1B/CAV1/APOE/DGAT1	12	189	703	20973	189/20973
	GO:0006606	protein import into nucleus	11/703	11/168	0.0263511098723897	0.265370552041505	0.238681105550423	FERMT1/BAG3/LMNA/PML/STAT3/HCLS1/NXT2/SNUPN/NOLC1/TP53/RGPD1	11	168	703	20973	168/20973
	GO:0016525	negative regulation of angiogenesis	11/703	11/168	0.0263511098723897	0.265370552041505	0.238681105550423	KLF4/PGK1/PML/AMOT/NIBAN2/FOXJ2/EPHA2/SPARC/THBS1/CTNNB1/EPN2	11	168	703	20973	168/20973
	GO:0034113	heterotypic cell-cell adhesion	7/703	7/87	0.0267766776405904	0.268035079789076	0.241077650395612	KLF4/PARVA/CD44/PKP2/CXADR/THY1/DSC2	7	87	703	20973	87/20973
	GO:0055013	cardiac muscle cell development	7/703	7/87	0.0267766776405904	0.268035079789076	0.241077650395612	LMNA/PLEC/G6PD/TBX5/CXADR/BMPR1A/OBSL1	7	87	703	20973	87/20973
	GO:0010810	regulation of cell-substrate adhesion	14/703	14/234	0.0267194755851561	0.268035079789076	0.241077650395612	FERMT1/PDPN/NRP1/DOCK1/LIMS1/ILK/THY1/SDC4/THBS1/NEDD9/CCN1/MINK1/LIMCH1/C1QBP	14	234	703	20973	234/20973
	GO:0042632	cholesterol homeostasis	8/703	8/107	0.027465813137173	0.270721309543596	0.243493714584493	ABCA1/AKR1C1/CES1/ABCA2/LIMA1/GRAMD1B/CAV1/APOE	8	107	703	20973	107/20973
	GO:0046822	regulation of nucleocytoplasmic transport	8/703	8/107	0.027465813137173	0.270721309543596	0.243493714584493	FERMT1/SFN/BAG3/HCLS1/TXN/ANP32B/YWHAE/NOLC1	8	107	703	20973	107/20973
	GO:0048814	regulation of dendrite morphogenesis	6/703	6/69	0.0279664055504495	0.270721309543596	0.243493714584493	CDKL5/TNIK/ITPKA/SARM1/PAFAH1B1/OBSL1	6	69	703	20973	69/20973
	GO:1900046	regulation of hemostasis	6/703	6/69	0.0279664055504495	0.270721309543596	0.243493714584493	CD9/F3/THBS1/CAV1/APOE/F2RL1	6	69	703	20973	69/20973
	GO:0008038	neuron recognition	5/703	5/51	0.0275573643099986	0.270721309543596	0.243493714584493	NRP1/BSG/EFNB3/NEXN/NDN	5	51	703	20973	51/20973
	GO:0060324	face development	5/703	5/51	0.0275573643099986	0.270721309543596	0.243493714584493	ALDH1A2/PLEKHA1/MAPK1/SGPL1/CRISPLD1	5	51	703	20973	51/20973
	GO:0001502	cartilage condensation	3/703	3/20	0.0279522844521544	0.270721309543596	0.243493714584493	COL2A1/ROR2/CCN2	3	20	703	20973	20/20973
	GO:0045091	regulation of single stranded viral RNA replication via double stranded DNA intermediate	3/703	3/20	0.0279522844521544	0.270721309543596	0.243493714584493	RESF1/HMGA2/INPP5K	3	20	703	20973	20/20973
	GO:0071397	cellular response to cholesterol	3/703	3/20	0.0279522844521544	0.270721309543596	0.243493714584493	CES1/GRAMD1A/GRAMD1B	3	20	703	20973	20/20973
	GO:2000251	positive regulation of actin cytoskeleton reorganization	3/703	3/20	0.0279522844521544	0.270721309543596	0.243493714584493	NRP1/HCLS1/BAIAP2L1	3	20	703	20973	20/20973
	GO:0051222	positive regulation of protein transport	18/703	18/327	0.027874891195275	0.270721309543596	0.243493714584493	PFKFB2/SFN/BAG3/UBL5/HCLS1/PFKM/ANP32B/UBE2L3/PPIA/GLUD1/MYRIP/KIF20B/YWHAE/EXPH5/AKAP5/MYH10/MYO1C/F2RL1	18	327	703	20973	327/20973
	GO:0060070	canonical Wnt signaling pathway	18/703	18/327	0.027874891195275	0.270721309543596	0.243493714584493	KLF4/FERMT1/AMER1/ILK/PTPRU/ROR2/DVL2/LRP4/LZTS2/CTNND1/MCC/CTNNB1/PLPP3/CDH2/CAV1/APOE/SDC1/TMEM88	18	327	703	20973	327/20973
	GO:0016358	dendrite development	15/703	15/257	0.0271333347127088	0.270721309543596	0.243493714584493	CDKL5/NRP1/HPRT1/TNIK/FARP1/SRCIN1/ITPKA/MAP1A/SARM1/LRP4/VLDLR/PAFAH1B1/MINK1/OBSL1/APOE	15	257	703	20973	257/20973
	GO:0031396	regulation of protein ubiquitination	14/703	14/235	0.0275747053457211	0.270721309543596	0.243493714584493	RPL37/AMER1/ARRB1/UBE2S/GCLC/MAGEA2/FBXO5/UBE2L3/PPIA/MTA1/ARRB2/BUB1B/CAV1/NXN	14	235	703	20973	235/20973
	GO:0072330	monocarboxylic acid biosynthetic process	14/703	14/235	0.0275747053457211	0.270721309543596	0.243493714584493	ANXA1/ALDH1A2/CES1/RBP1/GSTM2/CBR1/MIF/MLYCD/SCD/ERLIN1/GATM/ACADVL/CRABP2/ACADL	14	235	703	20973	235/20973
	GO:0000302	response to reactive oxygen species	13/703	13/213	0.0278125522426057	0.270721309543596	0.243493714584493	ANXA1/NQO1/MAPT/PLEKHA1/PRDX3/MAPK1/TXN/SIGMAR1/PAX2/KDM6B/APOE/SDC1/UCP1	13	213	703	20973	213/20973
	GO:0031032	actomyosin structure organization	13/703	13/213	0.0278125522426057	0.270721309543596	0.243493714584493	NRP1/ARRB1/PLEC/CGNL1/TMOD1/SDC4/OBSL1/LIMCH1/CSRP2/MYH10/INPP5K/CCN2/KRT19	13	213	703	20973	213/20973
	GO:0006919	activation of cysteine-type endopeptidase activity involved in apoptotic process	7/703	7/88	0.0282827342766098	0.271007889090592	0.243751471606058	F3/PML/MAPT/ANP32B/DIABLO/S100A9/ATP2A3	7	88	703	20973	88/20973
	GO:0006970	response to osmotic stress	7/703	7/88	0.0282827342766098	0.271007889090592	0.243751471606058	SERPINB6/SORD/MYLK/MICU1/ITGA2/NOLC1/TP53	7	88	703	20973	88/20973
	GO:0033627	cell adhesion mediated by integrin	7/703	7/88	0.0282827342766098	0.271007889090592	0.243751471606058	FERMT1/IFT74/ITGA1/EPHA2/ITGA2/PODXL/PLPP3	7	88	703	20973	88/20973
	GO:0006816	calcium ion transport	24/703	24/471	0.0284300568335275	0.271007889090592	0.243751471606058	ITPR2/PML/ANK2/CRACR2A/GSTM2/CALM1/G6PD/PSEN2/CAMK2G/ARRB2/IBTK/MYLK/MICU1/MICU2/THY1/JPH1/YWHAE/RASA3/CTNNB1/ATP2A3/CAV1/INPP5K/CCN2/HSPA2	24	471	703	20973	471/20973
	GO:0046942	carboxylic acid transport	17/703	17/304	0.0280641214296621	0.271007889090592	0.243751471606058	ANXA1/PRAF2/SLC38A5/SLC6A11/AKR1C1/SLC7A3/CES1/MIF/SLC25A22/SLC25A32/SLC43A2/SV2A/SLC25A11/SLC7A11/SLC43A1/GJA1/SLC7A6	17	304	703	20973	304/20973
	GO:0010821	regulation of mitochondrion organization	11/703	11/170	0.0284148371765514	0.271007889090592	0.243751471606058	LMNA/MAPT/GCLC/STAT2/ZDHHC6/ARRB2/OMA1/GHITM/SREBF1/CLU/TP53	11	170	703	20973	170/20973
	GO:0097530	granulocyte migration	11/703	11/170	0.0284148371765514	0.271007889090592	0.243751471606058	MYD88/ANXA1/MAPK1/PPIA/BSG/ITGA1/CXADR/THBS1/S100A9/RARRES2/C1QBP	11	170	703	20973	170/20973
	GO:2000181	negative regulation of blood vessel morphogenesis	11/703	11/170	0.0284148371765514	0.271007889090592	0.243751471606058	KLF4/PGK1/PML/AMOT/NIBAN2/FOXJ2/EPHA2/SPARC/THBS1/CTNNB1/EPN2	11	170	703	20973	170/20973
	GO:0009062	fatty acid catabolic process	8/703	8/108	0.0288278224354325	0.271688628424501	0.244363746086248	DECR1/EHHADH/MLYCD/IVD/TYSND1/CRAT/ACADVL/ACADL	8	108	703	20973	108/20973
	GO:0055092	sterol homeostasis	8/703	8/108	0.0288278224354325	0.271688628424501	0.244363746086248	ABCA1/AKR1C1/CES1/ABCA2/LIMA1/GRAMD1B/CAV1/APOE	8	108	703	20973	108/20973
	GO:0019320	hexose catabolic process	4/703	4/35	0.0287841843645438	0.271688628424501	0.244363746086248	PFKFB2/PFKM/TP53/TKTL1	4	35	703	20973	35/20973
	GO:2001234	negative regulation of apoptotic signaling pathway	15/703	15/259	0.0287961164753164	0.271688628424501	0.244363746086248	LMNA/NRP1/CD44/GCLC/MIF/PPIA/ARRB2/ITPRIP/COL2A1/THBS1/GHITM/CTNNA1/CLU/CTNNB1/ZNF385A	15	259	703	20973	259/20973
	GO:0034284	response to monosaccharide	13/703	13/214	0.0287432717289238	0.271688628424501	0.244363746086248	PFKFB2/CCDC186/GCLC/SLC39A14/PAX2/RMI1/THBS1/SARM1/ITGA2/SREBF1/TWNK/CCN2/LIN28A	13	214	703	20973	214/20973
	GO:0035264	multicellular organism growth	10/703	10/149	0.0287034084391597	0.271688628424501	0.244363746086248	WDR11/PLEKHA1/STAT3/PLEC/NPY1R/SGPL1/RMI1/SPTBN2/TP53/RAI1	10	149	703	20973	149/20973
	GO:0000959	mitochondrial RNA metabolic process	5/703	5/52	0.0296778282148441	0.27708551763205	0.249217847163708	TFAM/MTERF2/SUPV3L1/ELAC2/TWNK	5	52	703	20973	52/20973
	GO:0007595	lactation	5/703	5/52	0.0296778282148441	0.27708551763205	0.249217847163708	APRT/UMPS/CAV1/GJA1/CCND1	5	52	703	20973	52/20973
	GO:0035850	epithelial cell differentiation involved in kidney development	5/703	5/52	0.0296778282148441	0.27708551763205	0.249217847163708	LAMB2/PAX2/PROM1/CTNNB1/PODXL	5	52	703	20973	52/20973
	GO:1902895	positive regulation of miRNA transcription	5/703	5/52	0.0296778282148441	0.27708551763205	0.249217847163708	KLF4/STAT3/BMPR1A/SREBF1/TP53	5	52	703	20973	52/20973
	GO:1901343	negative regulation of vasculature development	11/703	11/171	0.0294891181555125	0.27708551763205	0.249217847163708	KLF4/PGK1/PML/AMOT/NIBAN2/FOXJ2/EPHA2/SPARC/THBS1/CTNNB1/EPN2	11	171	703	20973	171/20973
	GO:0045861	negative regulation of proteolysis	21/703	21/401	0.030005329206397	0.279620558555883	0.251497928226439	KLF4/SFN/PML/TRIM21/CD44/F8A1/SERPINB6/SNX12/IGBP1/PRDX3/SERPINB9/PEBP1/EIF3H/BAG6/ARRB2/PAX2/TFPI2/MAP1A/THBS1/TP53/SPINT2	21	401	703	20973	401/20973
	GO:0003333	amino acid transmembrane transport	8/703	8/109	0.0302357164523478	0.28124283739195	0.252957047571538	PRAF2/SLC38A5/SLC7A3/SLC25A22/SLC43A2/SLC7A11/SLC43A1/SLC7A6	8	109	703	20973	109/20973
	GO:0009410	response to xenobiotic stimulus	23/703	23/450	0.0305204401468144	0.282454489225133	0.254046838420077	NQO1/MGMT/SLC6A11/ABCA3/AS3MT/AKR1C1/ASS1/CPS1/BCHE/ABCA2/GSTM2/GCLC/SORD/PARP4/CBR1/UMPS/PFAS/THBS1/ITGA2/SREBF1/CTNNB1/TP53/CCND1	23	450	703	20973	450/20973
	GO:0060047	heart contraction	15/703	15/261	0.0305329669049321	0.282454489225133	0.254046838420077	GLRX3/ANK2/GSTM2/CALM1/TBX5/PKP2/CXADR/YWHAE/MAP2K3/SREBF1/DSC2/ATP2A3/CAV1/CCN2/GJA1	15	261	703	20973	261/20973
	GO:0051170	import into nucleus	11/703	11/172	0.0305921679020615	0.282454489225133	0.254046838420077	FERMT1/BAG3/LMNA/PML/STAT3/HCLS1/NXT2/SNUPN/NOLC1/TP53/RGPD1	11	172	703	20973	172/20973
	GO:2001236	regulation of extrinsic apoptotic signaling pathway	11/703	11/172	0.0305921679020615	0.282454489225133	0.254046838420077	LMNA/PML/NRP1/GCLC/ITPRIP/COL2A1/ITM2C/THBS1/CTNNA1/TNFRSF12A/CAV1	11	172	703	20973	172/20973
	GO:0048015	phosphatidylinositol-mediated signaling	12/703	12/194	0.0308154763304702	0.283991336292802	0.255429118233534	INPP5F/PLCL2/PLEKHA1/HCLS1/STAMBP/PLCH1/ROR2/PLCB4/CEP55/C1QBP/CA8/F2RL1	12	194	703	20973	194/20973
	GO:0071496	cellular response to external stimulus	18/703	18/331	0.03090907805501	0.284329364428683	0.255733149440308	MYD88/TNFRSF10A/WDR45/BAG3/GCLC/MAPK1/PLEC/NUDT1/DCTPP1/TTC5/XPR1/ITGA2/MAP2K4/SREBF1/DSC2/TP53/MYBBP1A/FAS	18	331	703	20973	331/20973
	GO:0055007	cardiac muscle cell differentiation	9/703	9/130	0.0310369968991441	0.284458347727018	0.255849160339058	LMNA/PLEC/G6PD/TBX5/ARRB2/CXADR/KDM6B/BMPR1A/OBSL1	9	130	703	20973	130/20973
	GO:1990748	cellular detoxification	9/703	9/130	0.0310369968991441	0.284458347727018	0.255849160339058	NQO1/PRDX3/GSTM2/TXN/MTARC1/TXNDC17/S100A9/APOE/NXN	9	130	703	20973	130/20973
	GO:0043583	ear development	14/703	14/239	0.0311980823711104	0.285411028285158	0.256706025756505	GABRA5/HMX3/IFT27/MAPK1/FREM2/ANP32B/DCHS1/PAX2/COL2A1/ROR2/SHROOM2/SDC4/DVL2/PAFAH1B1	14	239	703	20973	239/20973
	GO:0048041	focal adhesion assembly	7/703	7/90	0.0314646317048106	0.285541731545767	0.256823583633599	NRP1/LIMS1/THY1/SDC4/THBS1/ITGA2/LIMCH1	7	90	703	20973	90/20973
	GO:0032922	circadian regulation of gene expression	6/703	6/71	0.0316158044302258	0.285541731545767	0.256823583633599	PML/ID3/NUDT12/MTA1/MYBBP1A/RAI1	6	71	703	20973	71/20973
	GO:0055002	striated muscle cell development	6/703	6/71	0.0316158044302258	0.285541731545767	0.256823583633599	PLEC/TMOD1/OBSL1/CSRP2/SDC1/KRT19	6	71	703	20973	71/20973
	GO:0031103	axon regeneration	5/703	5/53	0.0318983555961037	0.285541731545767	0.256823583633599	KLF4/INPP5F/LAMB2/CTNNA1/RTN4RL2	5	53	703	20973	53/20973
	GO:0034332	adherens junction organization	5/703	5/53	0.0318983555961037	0.285541731545767	0.256823583633599	PLEC/CSK/CDH6/DCHS1/CTNNB1	5	53	703	20973	53/20973
	GO:0086004	regulation of cardiac muscle cell contraction	4/703	4/36	0.031550988935682	0.285541731545767	0.256823583633599	ANK2/PKP2/DSC2/CAV1	4	36	703	20973	36/20973
	GO:0006244	pyrimidine nucleotide catabolic process	3/703	3/21	0.0318188978352605	0.285541731545767	0.256823583633599	TYMP/DCTPP1/ENTPD7	3	21	703	20973	21/20973
	GO:0006851	mitochondrial calcium ion transmembrane transport	3/703	3/21	0.0318188978352605	0.285541731545767	0.256823583633599	PSEN2/MICU1/MICU2	3	21	703	20973	21/20973
	GO:0008090	retrograde axonal transport	3/703	3/21	0.0318188978352605	0.285541731545767	0.256823583633599	KIF1C/MAP1A/PAFAH1B1	3	21	703	20973	21/20973
	GO:0015936	coenzyme A metabolic process	3/703	3/21	0.0318188978352605	0.285541731545767	0.256823583633599	MCCC2/PANK1/SLC25A16	3	21	703	20973	21/20973
	GO:0045717	negative regulation of fatty acid biosynthetic process	3/703	3/21	0.0318188978352605	0.285541731545767	0.256823583633599	ERLIN1/ACADVL/ACADL	3	21	703	20973	21/20973
	GO:0051271	negative regulation of cellular component movement	21/703	21/403	0.0314183715746825	0.285541731545767	0.256823583633599	KLF4/ARHGAP4/CD9/DDT/STAT3/MIF/TBX5/TGFBR3/PTPRU/THY1/THBS1/BMPR1A/CTNNA1/EPPK1/MCC/LIMCH1/APOE/GJA1/CLDN3/SPINT2/ARPIN	21	403	703	20973	403/20973
	GO:0030282	bone mineralization	9/703	9/131	0.0323790111533929	0.28880921555571	0.259762442862182	MINPP1/ROR2/ALPL/BMPR1A/ENPP1/CCN1/RFLNB/GJA1/IFT80	9	131	703	20973	131/20973
	GO:0048675	axon extension	9/703	9/131	0.0323790111533929	0.28880921555571	0.259762442862182	CDKL5/ARHGAP4/NRP1/MAPT/LAMB2/SHTN1/PAFAH1B1/APOE/NDN	9	131	703	20973	131/20973
	GO:1901879	regulation of protein depolymerization	7/703	7/91	0.033141983261	0.295034819805462	0.265361911580994	ADD3/TMOD1/LIMA1/MID1/MAP1A/SPTBN2/F2RL1	7	91	703	20973	91/20973
	GO:0016072	rRNA metabolic process	16/703	16/287	0.0331951088549889	0.295034819805462	0.265361911580994	ERI2/PIN4/MAPT/UTP11/TBL3/WDR18/RRP12/TSR1/PELP1/GEMIN4/SNU13/NOLC1/TP53/MRM3/MACROH2A2/NCL	16	287	703	20973	287/20973
	GO:0050818	regulation of coagulation	6/703	6/72	0.0335514118028697	0.297320808351549	0.26741798852419	CD9/F3/THBS1/CAV1/APOE/F2RL1	6	72	703	20973	72/20973
	GO:0007266	Rho protein signal transduction	10/703	10/153	0.0335713585405953	0.297320808351549	0.26741798852419	ARHGAP4/ABCA1/PDPN/NRP1/ARHGDIA/SHTN1/ARRB1/APOE/F2RL1/CELSR1	10	153	703	20973	153/20973
	GO:0042542	response to hydrogen peroxide	9/703	9/132	0.0337607178535494	0.29838893405022	0.268378688272765	ANXA1/NQO1/PLEKHA1/PRDX3/TXN/SIGMAR1/PAX2/KDM6B/SDC1	9	132	703	20973	132/20973
	GO:0060964	regulation of miRNA-mediated gene silencing	5/703	5/54	0.0342200141489026	0.29838893405022	0.268378688272765	MAEL/STAT3/TIAL1/TP53/LIN28A	5	54	703	20973	54/20973
	GO:0009065	glutamine family amino acid catabolic process	4/703	4/37	0.0344685515409364	0.29838893405022	0.268378688272765	ASRGL1/GLUD1/DDAH1/ARG2	4	37	703	20973	37/20973
	GO:0017004	cytochrome complex assembly	4/703	4/37	0.0344685515409364	0.29838893405022	0.268378688272765	TIMM21/COA6/COX15/TTC19	4	37	703	20973	37/20973
	GO:0042558	pteridine-containing compound metabolic process	4/703	4/37	0.0344685515409364	0.29838893405022	0.268378688272765	FOLH1/SLC25A32/SHMT1/PCBD1	4	37	703	20973	37/20973
	GO:0043516	regulation of DNA damage response, signal transduction by p53 class mediator	4/703	4/37	0.0344685515409364	0.29838893405022	0.268378688272765	CD44/MIF/TP53/ZNF385A	4	37	703	20973	37/20973
	GO:0051788	response to misfolded protein	4/703	4/37	0.0344685515409364	0.29838893405022	0.268378688272765	UFD1/BAG6/TOR1A/CLU	4	37	703	20973	37/20973
	GO:0070536	protein K63-linked deubiquitination	4/703	4/37	0.0344685515409364	0.29838893405022	0.268378688272765	YOD1/ABRAXAS2/STAMBP/UIMC1	4	37	703	20973	37/20973
	GO:0072528	pyrimidine-containing compound biosynthetic process	4/703	4/37	0.0344685515409364	0.29838893405022	0.268378688272765	CPS1/UMPS/NME2/SHMT1	4	37	703	20973	37/20973
	GO:0086005	ventricular cardiac muscle cell action potential	4/703	4/37	0.0344685515409364	0.29838893405022	0.268378688272765	ANK2/PKP2/DSC2/CAV1	4	37	703	20973	37/20973
	GO:1902253	regulation of intrinsic apoptotic signaling pathway by p53 class mediator	4/703	4/37	0.0344685515409364	0.29838893405022	0.268378688272765	CD44/MIF/TP53/ZNF385A	4	37	703	20973	37/20973
	GO:0050730	regulation of peptidyl-tyrosine phosphorylation	16/703	16/288	0.0341054377900882	0.29838893405022	0.268378688272765	PARP14/INPP5F/NRP1/CD44/HCLS1/MIF/ARRB2/IBTK/THY1/SRCIN1/DVL2/LRP4/NEDD9/CRLF1/TP53/CAV1	16	288	703	20973	288/20973
	GO:0043491	protein kinase B signaling	14/703	14/242	0.0341348795953721	0.29838893405022	0.268378688272765	F3/INPP5F/PLEKHA1/HCLS1/TXN/ILK/ARRB2/PAX2/EPHA2/THBS1/MYORG/INPP5K/C1QBP/LIN28A	14	242	703	20973	242/20973
	GO:0009141	nucleoside triphosphate metabolic process	8/703	8/112	0.0347407832443552	0.299706757004411	0.269563972160545	AK4/NUDT2/IMPDH1/DCTPP1/NME2/MFN1/ENPP1/ENTPD7	8	112	703	20973	112/20973
	GO:0019395	fatty acid oxidation	8/703	8/112	0.0347407832443552	0.299706757004411	0.269563972160545	DECR1/EHHADH/MLYCD/IVD/TYSND1/CRAT/ACADVL/ACADL	8	112	703	20973	112/20973
	GO:0072332	intrinsic apoptotic signaling pathway by p53 class mediator	7/703	7/92	0.0348778834084418	0.300370737284771	0.27016117311657	PML/CD44/MIF/BAG6/TP53/MYBBP1A/ZNF385A	7	92	703	20973	92/20973
	GO:0045995	regulation of embryonic development	6/703	6/73	0.0355621024416068	0.303839195245633	0.273280793489987	AMOT/NIBAN2/BAG6/PHLDB1/PAFAH1B1/CTNNB1	6	73	703	20973	73/20973
	GO:0150116	regulation of cell-substrate junction organization	6/703	6/73	0.0355621024416068	0.303839195245633	0.273280793489987	NRP1/LIMS1/THY1/SDC4/THBS1/LIMCH1	6	73	703	20973	73/20973
	GO:0006144	purine nucleobase metabolic process	3/703	3/22	0.0359497426206545	0.303839195245633	0.273280793489987	APRT/HPRT1/SHMT1	3	22	703	20973	22/20973
	GO:0033762	response to glucagon	3/703	3/22	0.0359497426206545	0.303839195245633	0.273280793489987	ASS1/CPS1/SREBF1	3	22	703	20973	22/20973
	GO:0039692	single stranded viral RNA replication via double stranded DNA intermediate	3/703	3/22	0.0359497426206545	0.303839195245633	0.273280793489987	RESF1/HMGA2/INPP5K	3	22	703	20973	22/20973
	GO:0051444	negative regulation of ubiquitin-protein transferase activity	3/703	3/22	0.0359497426206545	0.303839195245633	0.273280793489987	RPL37/FBXO5/BUB1B	3	22	703	20973	22/20973
	GO:0061318	renal filtration cell differentiation	3/703	3/22	0.0359497426206545	0.303839195245633	0.273280793489987	LAMB2/PROM1/PODXL	3	22	703	20973	22/20973
	GO:0071404	cellular response to low-density lipoprotein particle stimulus	3/703	3/22	0.0359497426206545	0.303839195245633	0.273280793489987	ABCA1/CD9/CES1	3	22	703	20973	22/20973
	GO:0071636	positive regulation of transforming growth factor beta production	3/703	3/22	0.0359497426206545	0.303839195245633	0.273280793489987	FERMT1/THBS1/BMPR1A	3	22	703	20973	22/20973
	GO:0072112	glomerular visceral epithelial cell differentiation	3/703	3/22	0.0359497426206545	0.303839195245633	0.273280793489987	LAMB2/PROM1/PODXL	3	22	703	20973	22/20973
	GO:0045860	positive regulation of protein kinase activity	22/703	22/433	0.0357364342407208	0.303839195245633	0.273280793489987	TNFRSF10A/CACUL1/CALM1/TXN/CSK/MIF/PPIA/CKS1B/HMGA2/ROR2/SRCIN1/SDC4/DVL2/MAP2K3/THBS1/BMPR1A/NEDD9/VLDLR/CLU/CCN1/CCND2/CCND1	22	433	703	20973	433/20973
	GO:0097529	myeloid leukocyte migration	15/703	15/267	0.0362047414107668	0.305007242732215	0.274331365466749	MYD88/ANXA1/CD9/DDT/MAPK1/MIF/PPIA/BSG/ITGA1/CXADR/ROR2/THBS1/S100A9/RARRES2/C1QBP	15	267	703	20973	267/20973
	GO:0033135	regulation of peptidyl-serine phosphorylation	10/703	10/155	0.0362100690570978	0.305007242732215	0.274331365466749	INPP5F/PLCL2/CD44/HCLS1/TXN/MIF/ARRB2/TNKS1BP1/CAV1/INPP5K	10	155	703	20973	155/20973
	GO:0042476	odontogenesis	9/703	9/134	0.0366450772813451	0.306836872044184	0.275976981167394	ID3/BSG/ALPL/BMPR1A/LRP4/CTNNA1/CTNNB1/ZNF22/SDC1	9	134	703	20973	134/20973
	GO:0051591	response to cAMP	7/703	7/93	0.0366729955175932	0.306836872044184	0.275976981167394	ASS1/ITPR2/CPS1/BSG/SREBF1/SDC1/INPP5K	7	93	703	20973	93/20973
	GO:0070301	cellular response to hydrogen peroxide	7/703	7/93	0.0366729955175932	0.306836872044184	0.275976981167394	ANXA1/NQO1/PLEKHA1/TXN/SIGMAR1/PAX2/KDM6B	7	93	703	20973	93/20973
	GO:0051784	negative regulation of nuclear division	5/703	5/55	0.0366437417746895	0.306836872044184	0.275976981167394	FBXO5/BUB1B/TOM1L2/BUB1/AURKB	5	55	703	20973	55/20973
	GO:0016042	lipid catabolic process	19/703	19/362	0.0369267937062792	0.308443703282382	0.277422206545326	IAH1/DECR1/INPP5F/CPS1/CES1/EHHADH/MLYCD/PLCH1/IVD/SGPL1/PLCB4/PAFAH1B1/TYSND1/PLD2/CRAT/RARRES2/APOE/ACADVL/ACADL	19	362	703	20973	362/20973
	GO:0009119	ribonucleoside metabolic process	4/703	4/38	0.0375375411147267	0.3125000297801	0.281070571013428	PGM2/APRT/PRTFDC1/HPRT1	4	38	703	20973	38/20973
	GO:0048384	retinoic acid receptor signaling pathway	4/703	4/38	0.0375375411147267	0.3125000297801	0.281070571013428	ALDH1A2/PRAME/PML/CTBP2	4	38	703	20973	38/20973
	GO:0098869	cellular oxidant detoxification	8/703	8/115	0.0396797370793303	0.318209081595105	0.286205439175577	NQO1/PRDX3/GSTM2/TXN/TXNDC17/S100A9/APOE/NXN	8	115	703	20973	115/20973
	GO:0046031	ADP metabolic process	7/703	7/94	0.0385279446970496	0.318209081595105	0.286205439175577	AK4/PFKFB2/PGK1/STAT3/PFKM/PGAM1/ENO3	7	94	703	20973	94/20973
	GO:0006749	glutathione metabolic process	6/703	6/75	0.0398117706664006	0.318209081595105	0.286205439175577	GSTM2/GCLC/OPLAH/G6PD/GGT1/SLC7A11	6	75	703	20973	75/20973
	GO:0007004	telomere maintenance via telomerase	6/703	6/75	0.0398117706664006	0.318209081595105	0.286205439175577	MAPK1/WRAP53/SMG6/CTNNB1/TNKS1BP1/AURKB	6	75	703	20973	75/20973
	GO:0006278	RNA-templated DNA biosynthetic process	6/703	6/76	0.0420520988277371	0.318209081595105	0.286205439175577	MAPK1/WRAP53/SMG6/CTNNB1/TNKS1BP1/AURKB	6	76	703	20973	76/20973
	GO:0030834	regulation of actin filament depolymerization	5/703	5/56	0.0391703465869795	0.318209081595105	0.286205439175577	ADD3/TMOD1/LIMA1/SPTBN2/F2RL1	5	56	703	20973	56/20973
	GO:0060147	regulation of post-transcriptional gene silencing	5/703	5/56	0.0391703465869795	0.318209081595105	0.286205439175577	MAEL/STAT3/TIAL1/TP53/LIN28A	5	56	703	20973	56/20973
	GO:0086002	cardiac muscle cell action potential involved in contraction	5/703	5/56	0.0391703465869795	0.318209081595105	0.286205439175577	ANK2/PKP2/DSC2/CAV1/GJA1	5	56	703	20973	56/20973
	GO:1900368	regulation of post-transcriptional gene silencing by RNA	5/703	5/56	0.0391703465869795	0.318209081595105	0.286205439175577	MAEL/STAT3/TIAL1/TP53/LIN28A	5	56	703	20973	56/20973
	GO:0001954	positive regulation of cell-matrix adhesion	5/703	5/57	0.0418005072505388	0.318209081595105	0.286205439175577	FERMT1/NRP1/LIMS1/THY1/SDC4	5	57	703	20973	57/20973
	GO:0046164	alcohol catabolic process	5/703	5/57	0.0418005072505388	0.318209081595105	0.286205439175577	INPP5A/SORD/APOE/INPP5K/ALDH2	5	57	703	20973	57/20973
	GO:0001941	postsynaptic membrane organization	4/703	4/39	0.0407583330551933	0.318209081595105	0.286205439175577	LRP4/SLC7A11/CDH2/APOE	4	39	703	20973	39/20973
	GO:0006515	protein quality control for misfolded or incompletely synthesized proteins	4/703	4/39	0.0407583330551933	0.318209081595105	0.286205439175577	UFD1/BAG6/OMA1/TOR1A	4	39	703	20973	39/20973
	GO:0045746	negative regulation of Notch signaling pathway	4/703	4/39	0.0407583330551933	0.318209081595105	0.286205439175577	MAGEA1/ARRB1/NIBAN2/HIF1AN	4	39	703	20973	39/20973
	GO:0046365	monosaccharide catabolic process	4/703	4/39	0.0407583330551933	0.318209081595105	0.286205439175577	PFKFB2/PFKM/TP53/TKTL1	4	39	703	20973	39/20973
	GO:0050775	positive regulation of dendrite morphogenesis	4/703	4/39	0.0407583330551933	0.318209081595105	0.286205439175577	CDKL5/ITPKA/PAFAH1B1/OBSL1	4	39	703	20973	39/20973
	GO:0061099	negative regulation of protein tyrosine kinase activity	4/703	4/39	0.0407583330551933	0.318209081595105	0.286205439175577	IBTK/THY1/SRCIN1/CAV1	4	39	703	20973	39/20973
	GO:0006662	glycerol ether metabolic process	3/703	3/23	0.040341853332502	0.318209081595105	0.286205439175577	TXN/PAFAH1B1/DHRS7B	3	23	703	20973	23/20973
	GO:0009129	pyrimidine nucleoside monophosphate metabolic process	3/703	3/23	0.040341853332502	0.318209081595105	0.286205439175577	TYMP/UMPS/SHMT1	3	23	703	20973	23/20973
	GO:0033630	positive regulation of cell adhesion mediated by integrin	3/703	3/23	0.040341853332502	0.318209081595105	0.286205439175577	FERMT1/IFT74/PODXL	3	23	703	20973	23/20973
	GO:0036303	lymph vessel morphogenesis	3/703	3/23	0.040341853332502	0.318209081595105	0.286205439175577	LGALS8/PDPN/EPHA2	3	23	703	20973	23/20973
	GO:0045540	regulation of cholesterol biosynthetic process	3/703	3/23	0.040341853332502	0.318209081595105	0.286205439175577	ERLIN1/SREBF1/APOE	3	23	703	20973	23/20973
	GO:0061484	hematopoietic stem cell homeostasis	3/703	3/23	0.040341853332502	0.318209081595105	0.286205439175577	OCIAD2/OCIAD1/CRISPLD1	3	23	703	20973	23/20973
	GO:0072311	glomerular epithelial cell differentiation	3/703	3/23	0.040341853332502	0.318209081595105	0.286205439175577	LAMB2/PROM1/PODXL	3	23	703	20973	23/20973
	GO:0098743	cell aggregation	3/703	3/23	0.040341853332502	0.318209081595105	0.286205439175577	COL2A1/ROR2/CCN2	3	23	703	20973	23/20973
	GO:0106118	regulation of sterol biosynthetic process	3/703	3/23	0.040341853332502	0.318209081595105	0.286205439175577	ERLIN1/SREBF1/APOE	3	23	703	20973	23/20973
	GO:0018108	peptidyl-tyrosine phosphorylation	21/703	21/413	0.0392432374375613	0.318209081595105	0.286205439175577	PARP14/INPP5F/NRP1/CD44/HCLS1/CSK/MIF/ARRB2/IBTK/EPHA2/THY1/ROR2/SRCIN1/DVL2/MAP2K3/LRP4/MAP2K4/NEDD9/CRLF1/TP53/CAV1	21	413	703	20973	413/20973
	GO:0018212	peptidyl-tyrosine modification	21/703	21/416	0.0418486364047997	0.318209081595105	0.286205439175577	PARP14/INPP5F/NRP1/CD44/HCLS1/CSK/MIF/ARRB2/IBTK/EPHA2/THY1/ROR2/SRCIN1/DVL2/MAP2K3/LRP4/MAP2K4/NEDD9/CRLF1/TP53/CAV1	21	416	703	20973	416/20973
	GO:0019058	viral life cycle	20/703	20/390	0.0403663887061354	0.318209081595105	0.286205439175577	TRIM38/TRIM21/NRP1/CTBP2/RESF1/CD55/ANPEP/CHMP1A/PPIA/HMGA2/BSG/XPR1/CXADR/EPHA2/ITGA2/EFNB3/CAV1/APOE/INPP5K/CLDN6	20	390	703	20973	390/20973
	GO:0003162	atrioventricular node development	2/703	2/10	0.0422367609804914	0.318209081595105	0.286205439175577	TBX5/BMPR1A	2	10	703	20973	10/20973
	GO:0003183	mitral valve morphogenesis	2/703	2/10	0.0422367609804914	0.318209081595105	0.286205439175577	DCHS1/BMPR1A	2	10	703	20973	10/20973
	GO:0006183	GTP biosynthetic process	2/703	2/10	0.0422367609804914	0.318209081595105	0.286205439175577	IMPDH1/NME2	2	10	703	20973	10/20973
	GO:0006930	substrate-dependent cell migration, cell extension	2/703	2/10	0.0422367609804914	0.318209081595105	0.286205439175577	NRP1/SHTN1	2	10	703	20973	10/20973
	GO:0018401	peptidyl-proline hydroxylation to 4-hydroxy-L-proline	2/703	2/10	0.0422367609804914	0.318209081595105	0.286205439175577	P4HA2/P4HA1	2	10	703	20973	10/20973
	GO:0021562	vestibulocochlear nerve development	2/703	2/10	0.0422367609804914	0.318209081595105	0.286205439175577	NRP1/PAX2	2	10	703	20973	10/20973
	GO:0030214	hyaluronan catabolic process	2/703	2/10	0.0422367609804914	0.318209081595105	0.286205439175577	CD44/CEMIP2	2	10	703	20973	10/20973
	GO:0032261	purine nucleotide salvage	2/703	2/10	0.0422367609804914	0.318209081595105	0.286205439175577	APRT/HPRT1	2	10	703	20973	10/20973
	GO:0042939	tripeptide transport	2/703	2/10	0.0422367609804914	0.318209081595105	0.286205439175577	SLC7A11/GJA1	2	10	703	20973	10/20973
	GO:0051342	regulation of cyclic-nucleotide phosphodiesterase activity	2/703	2/10	0.0422367609804914	0.318209081595105	0.286205439175577	CALM1/SLC39A14	2	10	703	20973	10/20973
	GO:0060371	regulation of atrial cardiac muscle cell membrane depolarization	2/703	2/10	0.0422367609804914	0.318209081595105	0.286205439175577	TBX5/GJA1	2	10	703	20973	10/20973
	GO:0060439	trachea morphogenesis	2/703	2/10	0.0422367609804914	0.318209081595105	0.286205439175577	MAPK1/CTNNB1	2	10	703	20973	10/20973
	GO:0060742	epithelial cell differentiation involved in prostate gland development	2/703	2/10	0.0422367609804914	0.318209081595105	0.286205439175577	FOXA1/CTNNB1	2	10	703	20973	10/20973
	GO:0060926	cardiac pacemaker cell development	2/703	2/10	0.0422367609804914	0.318209081595105	0.286205439175577	TBX5/BMPR1A	2	10	703	20973	10/20973
	GO:0070874	negative regulation of glycogen metabolic process	2/703	2/10	0.0422367609804914	0.318209081595105	0.286205439175577	ENPP1/INPP5K	2	10	703	20973	10/20973
	GO:0072319	vesicle uncoating	2/703	2/10	0.0422367609804914	0.318209081595105	0.286205439175577	SH3GL3/DNAJC6	2	10	703	20973	10/20973
	GO:1900122	positive regulation of receptor binding	2/703	2/10	0.0422367609804914	0.318209081595105	0.286205439175577	PLCL2/NRP1	2	10	703	20973	10/20973
	GO:1901401	regulation of tetrapyrrole metabolic process	2/703	2/10	0.0422367609804914	0.318209081595105	0.286205439175577	ABCB7/ABCB10	2	10	703	20973	10/20973
	GO:1903596	regulation of gap junction assembly	2/703	2/10	0.0422367609804914	0.318209081595105	0.286205439175577	TBX5/CAV1	2	10	703	20973	10/20973
	GO:1903748	negative regulation of establishment of protein localization to mitochondrion	2/703	2/10	0.0422367609804914	0.318209081595105	0.286205439175577	BAG3/MAPT	2	10	703	20973	10/20973
	GO:1904153	negative regulation of retrograde protein transport, ER to cytosol	2/703	2/10	0.0422367609804914	0.318209081595105	0.286205439175577	YOD1/DERL2	2	10	703	20973	10/20973
	GO:0060326	cell chemotaxis	19/703	19/367	0.0414490497795006	0.318209081595105	0.286205439175577	ANXA1/PARVA/DDT/NRP1/MAPK1/PLEC/MIF/PPIA/BSG/ITGA1/ARRB2/CXADR/EPHA2/HOXB9/THBS1/S100A9/RARRES2/C1QBP/F2RL1	19	367	703	20973	367/20973
	GO:0071214	cellular response to abiotic stimulus	18/703	18/341	0.0395623249670658	0.318209081595105	0.286205439175577	MYD88/TNFRSF10A/MGMT/BAG3/SERPINB6/GCLC/PLEC/CAMKMT/HMGA2/MYLK/MICU1/ITGA2/MAP2K4/TNKS1BP1/TP53/FAS/AURKB/GJA1	18	341	703	20973	341/20973
	GO:0104004	cellular response to environmental stimulus	18/703	18/341	0.0395623249670658	0.318209081595105	0.286205439175577	MYD88/TNFRSF10A/MGMT/BAG3/SERPINB6/GCLC/PLEC/CAMKMT/HMGA2/MYLK/MICU1/ITGA2/MAP2K4/TNKS1BP1/TP53/FAS/AURKB/GJA1	18	341	703	20973	341/20973
	GO:0060485	mesenchyme development	17/703	17/318	0.0403412126194498	0.318209081595105	0.286205439175577	ALDH1A2/PDPN/NRP1/FOXA1/AMER1/MAPK1/TBX5/HMGA2/TGFBR3/PHLDB1/DCHS1/PAX2/BMPR1A/NOLC1/CTNNB1/CDH2/RFLNB	17	318	703	20973	318/20973
	GO:0007160	cell-matrix adhesion	15/703	15/270	0.0393100707598831	0.318209081595105	0.286205439175577	FERMT1/NRP1/CD44/LIMS1/ILK/ITGA1/THY1/SDC4/THBS1/ITGA2/MINK1/CTNNB1/LIMCH1/CCN2/CD63	15	270	703	20973	270/20973
	GO:0003015	heart process	15/703	15/271	0.0403863898860189	0.318209081595105	0.286205439175577	GLRX3/ANK2/GSTM2/CALM1/TBX5/PKP2/CXADR/YWHAE/MAP2K3/SREBF1/DSC2/ATP2A3/CAV1/CCN2/GJA1	15	271	703	20973	271/20973
	GO:0061448	connective tissue development	15/703	15/272	0.0414836227739897	0.318209081595105	0.286205439175577	CD44/FOXA1/AMER1/HMGA2/SLC39A14/ZNF219/COL2A1/ROR2/BMPR1A/CCN1/CTNNB1/DHRS7B/CCN2/RFLNB/IFT80	15	272	703	20973	272/20973
	GO:0051648	vesicle localization	12/703	12/202	0.040079701965745	0.318209081595105	0.286205439175577	WDR11/CCDC186/F8A1/KIF1C/SHROOM2/TOR1A/SDC4/PAFAH1B1/CTNNB1/CDH2/SDC1/MYO1C	12	202	703	20973	202/20973
	GO:0006164	purine nucleotide biosynthetic process	12/703	12/203	0.0413612737665712	0.318209081595105	0.286205439175577	AK4/APRT/NUDT2/IMPDH1/HPRT1/NME2/PANK1/PFAS/MLYCD/ADCY7/SLC25A16/ACSL6	12	203	703	20973	203/20973
	GO:0009749	response to glucose	12/703	12/203	0.0413612737665712	0.318209081595105	0.286205439175577	PFKFB2/CCDC186/GCLC/SLC39A14/PAX2/RMI1/THBS1/SARM1/SREBF1/TWNK/CCN2/LIN28A	12	203	703	20973	203/20973
	GO:1902904	negative regulation of supramolecular fiber organization	11/703	11/181	0.0418711558780818	0.318209081595105	0.286205439175577	TUBB4A/CGNL1/ADD3/TMOD1/LIMA1/MID1/SPTBN2/CLU/APOE/INPP5K/ARPIN	11	181	703	20973	181/20973
	GO:0003158	endothelium development	10/703	10/157	0.038989411754952	0.318209081595105	0.286205439175577	MYD88/PDPN/NRP1/MSN/FOXJ2/KDM6B/COL18A1/CTNNB1/F2RL1/CLDN3	10	157	703	20973	157/20973
	GO:0043524	negative regulation of neuron apoptotic process	10/703	10/157	0.038989411754952	0.318209081595105	0.286205439175577	GABRA5/NRP1/GCLC/STAMBP/ARRB2/CNTFR/MAP2K4/CRLF1/PCDHGC3/APOE	10	157	703	20973	157/20973
	GO:2000106	regulation of leukocyte apoptotic process	7/703	7/96	0.0424196592250657	0.319105719622294	0.287011898498066	ANXA1/HCLS1/MIF/SLC7A11/TP53/AURKB/ARG2	7	96	703	20973	96/20973
	GO:0071897	DNA biosynthetic process	12/703	12/204	0.0426711894297682	0.320515174739387	0.288279598711913	KLF4/MAPK1/PARP4/NIBAN2/WRAP53/ARRB2/SMG6/CTNNB1/TNKS1BP1/TP53/AURKB/CCN2	12	204	703	20973	204/20973
	GO:1903829	positive regulation of protein localization	24/703	24/491	0.0427588022939729	0.320691017204797	0.288437755951756	PFKFB2/SFN/BAG3/MAPT/MSN/UBL5/HCLS1/PFKM/ANP32B/UBE2L3/PPIA/WRAP53/GLUD1/EPHA2/MYRIP/MAP1A/KIF20B/YWHAE/LRP4/EXPH5/AKAP5/MYH10/MYO1C/F2RL1	24	491	703	20973	491/20973
	GO:0061387	regulation of extent of cell growth	8/703	8/117	0.0432202044025447	0.323665548711711	0.29111312615807	CDKL5/ARHGAP4/NRP1/MAPT/SHTN1/PAFAH1B1/APOE/CRABP2	8	117	703	20973	117/20973
	GO:0033865	nucleoside bisphosphate metabolic process	9/703	9/139	0.0445816244396949	0.32428960449788	0.291674417996302	MCCC2/FAR2/PMVK/PANK1/MLYCD/SLC25A16/ACSL6/ENPP1/DGAT1	9	139	703	20973	139/20973
	GO:0033875	ribonucleoside bisphosphate metabolic process	9/703	9/139	0.0445816244396949	0.32428960449788	0.291674417996302	MCCC2/FAR2/PMVK/PANK1/MLYCD/SLC25A16/ACSL6/ENPP1/DGAT1	9	139	703	20973	139/20973
	GO:0034032	purine nucleoside bisphosphate metabolic process	9/703	9/139	0.0445816244396949	0.32428960449788	0.291674417996302	MCCC2/FAR2/PMVK/PANK1/MLYCD/SLC25A16/ACSL6/ENPP1/DGAT1	9	139	703	20973	139/20973
	GO:0061180	mammary gland epithelium development	6/703	6/77	0.0443702102577649	0.32428960449788	0.291674417996302	MGMT/PML/LBH/MAPK1/EPHA2/CCND1	6	77	703	20973	77/20973
	GO:0140056	organelle localization by membrane tethering	6/703	6/77	0.0443702102577649	0.32428960449788	0.291674417996302	PDZD8/CTBP2/CALM1/PSEN2/VAMP3/STX8	6	77	703	20973	77/20973
	GO:1902893	regulation of miRNA transcription	6/703	6/77	0.0443702102577649	0.32428960449788	0.291674417996302	KLF4/STAT3/ZNF512B/BMPR1A/SREBF1/TP53	6	77	703	20973	77/20973
	GO:2000379	positive regulation of reactive oxygen species metabolic process	6/703	6/77	0.0443702102577649	0.32428960449788	0.291674417996302	AKR1C1/MAPT/CBR1/THBS1/TP53/F2RL1	6	77	703	20973	77/20973
	GO:0030857	negative regulation of epithelial cell differentiation	5/703	5/58	0.044534773635813	0.32428960449788	0.291674417996302	FOXJ2/SRSF6/CTNNB1/CAV1/CCND1	5	58	703	20973	58/20973
	GO:0060425	lung morphogenesis	5/703	5/58	0.044534773635813	0.32428960449788	0.291674417996302	FOXA1/MAPK1/SRSF6/CTNNB1/CELSR1	5	58	703	20973	58/20973
	GO:0060966	regulation of gene silencing by RNA	5/703	5/58	0.044534773635813	0.32428960449788	0.291674417996302	MAEL/STAT3/TIAL1/TP53/LIN28A	5	58	703	20973	58/20973
	GO:0032094	response to food	4/703	4/40	0.0441310179374401	0.32428960449788	0.291674417996302	CPS1/PLEC/G6PD/SREBF1	4	40	703	20973	40/20973
	GO:0045841	negative regulation of mitotic metaphase/anaphase transition	4/703	4/40	0.0441310179374401	0.32428960449788	0.291674417996302	FBXO5/BUB1B/BUB1/AURKB	4	40	703	20973	40/20973
	GO:1902229	regulation of intrinsic apoptotic signaling pathway in response to DNA damage	4/703	4/40	0.0441310179374401	0.32428960449788	0.291674417996302	CD44/MIF/CLU/ZNF385A	4	40	703	20973	40/20973
	GO:0001710	mesodermal cell fate commitment	3/703	3/24	0.0449915307141203	0.32428960449788	0.291674417996302	KLF4/PAX2/BMPR1A	3	24	703	20973	24/20973
	GO:0003283	atrial septum development	3/703	3/24	0.0449915307141203	0.32428960449788	0.291674417996302	ANK2/TBX5/CCN1	3	24	703	20973	24/20973
	GO:0009147	pyrimidine nucleoside triphosphate metabolic process	3/703	3/24	0.0449915307141203	0.32428960449788	0.291674417996302	DCTPP1/NME2/ENTPD7	3	24	703	20973	24/20973
	GO:0010881	regulation of cardiac muscle contraction by regulation of the release of sequestered calcium ion	3/703	3/24	0.0449915307141203	0.32428960449788	0.291674417996302	ANK2/GSTM2/CALM1	3	24	703	20973	24/20973
	GO:0040019	positive regulation of embryonic development	3/703	3/24	0.0449915307141203	0.32428960449788	0.291674417996302	AMOT/NIBAN2/PAFAH1B1	3	24	703	20973	24/20973
	GO:0051457	maintenance of protein location in nucleus	3/703	3/24	0.0449915307141203	0.32428960449788	0.291674417996302	SYNE1/PML/TXN	3	24	703	20973	24/20973
	GO:0071712	ER-associated misfolded protein catabolic process	3/703	3/24	0.0449915307141203	0.32428960449788	0.291674417996302	UFD1/BAG6/TOR1A	3	24	703	20973	24/20973
	GO:2000679	positive regulation of transcription regulatory region DNA binding	3/703	3/24	0.0449915307141203	0.32428960449788	0.291674417996302	KLF4/NIBAN2/CTNNB1	3	24	703	20973	24/20973
	GO:0051403	stress-activated MAPK cascade	15/703	15/275	0.0449025922688785	0.32428960449788	0.291674417996302	MYD88/CRACR2A/IGBP1/MAPK1/PPIA/TNIK/ROR2/MID1/MAP2K3/MAP2K4/PAFAH1B1/MINK1/FAS/CCN2/F2RL1	15	275	703	20973	275/20973
	GO:0010721	negative regulation of cell development	12/703	12/205	0.0440096976947211	0.32428960449788	0.291674417996302	RNF10/ARHGAP4/NRP1/THY1/BMPR1A/LRP4/EFNB3/CTNNA1/CTNNB1/TP53/RFLNB/LIN28A	12	205	703	20973	205/20973
	GO:0048839	inner ear development	12/703	12/205	0.0440096976947211	0.32428960449788	0.291674417996302	GABRA5/HMX3/IFT27/FREM2/ANP32B/DCHS1/PAX2/COL2A1/ROR2/SDC4/DVL2/PAFAH1B1	12	205	703	20973	205/20973
	GO:0031214	biomineral tissue development	11/703	11/183	0.0447220438131699	0.32428960449788	0.291674417996302	FBXO5/FAM83H/MINPP1/ROR2/ALPL/BMPR1A/ENPP1/CCN1/RFLNB/GJA1/IFT80	11	183	703	20973	183/20973
	GO:0019827	stem cell population maintenance	10/703	10/160	0.0434283681735823	0.32428960449788	0.291674417996302	KLF4/STAT3/LBH/HMGA2/SALL4/PAX2/BMPR1A/CTNNB1/CDH2/LIN28A	10	160	703	20973	160/20973
	GO:0050673	epithelial cell proliferation	23/703	23/469	0.0451796273222186	0.325176136130377	0.292471787367251	ALDH1A2/FERMT1/SFN/F3/NRP1/STAT3/MAPK1/IFT74/NME2/TGFBR3/PAX2/EPHA2/SRSF6/SPARC/THBS1/BMPR1A/EPPK1/MCC/CTNNB1/CAV1/APOE/CCND1/IFT80	23	469	703	20973	469/20973
	GO:0016197	endosomal transport	14/703	14/252	0.0453641917926811	0.326034730941643	0.293244029642049	ABCA1/INPP5F/DENND10/VTI1A/SNX12/TBC1D17/DENND1A/HEATR5A/CHMP1A/VAMP3/TMEM87A/RHOBTB3/ANKFY1/AKAP5	14	252	703	20973	252/20973
	GO:0048638	regulation of developmental growth	18/703	18/347	0.0455330429248608	0.326778088232299	0.293912624324419	CDKL5/ARHGAP4/MAEL/NRP1/MAPT/SHTN1/STAT3/G6PD/TBX5/TGFBR3/NPY1R/SGPL1/BMPR1A/EPPK1/PAFAH1B1/APOE/RAI1/CRABP2	18	347	703	20973	347/20973
	GO:0051650	establishment of vesicle localization	11/703	11/184	0.0461962105805413	0.331061796054238	0.297765501408669	WDR11/CCDC186/F8A1/KIF1C/SHROOM2/TOR1A/SDC4/PAFAH1B1/CTNNB1/SDC1/MYO1C	11	184	703	20973	184/20973
	GO:0048545	response to steroid hormone	19/703	19/372	0.0463609296861097	0.331766251836845	0.298399107073317	ANXA3/ANXA1/ABCA3/ASS1/CPS1/FOXA1/BCHE/ABCA2/LBH/UBE2L3/ZMIZ1/PTPRU/ALPL/THBS1/SREBF1/CAV1/SDC1/CCN2/CCND1	19	372	703	20973	372/20973
	GO:0061614	miRNA transcription	6/703	6/78	0.0467666099034209	0.332337682351803	0.298913066387966	KLF4/STAT3/ZNF512B/BMPR1A/SREBF1/TP53	6	78	703	20973	78/20973
	GO:0043588	skin development	17/703	17/324	0.0466442486069865	0.332337682351803	0.298913066387966	ANXA1/FERMT1/SFN/PLEC/IFT74/NME2/HRNR/EPHA2/SRSF6/ITGA2/LRP4/EXPH5/CTNNB1/KRT8/MACROH2A2/PPL/KRT86	17	324	703	20973	324/20973
	GO:0009746	response to hexose	12/703	12/207	0.0467734515902537	0.332337682351803	0.298913066387966	PFKFB2/CCDC186/GCLC/SLC39A14/PAX2/RMI1/THBS1/SARM1/SREBF1/TWNK/CCN2/LIN28A	12	207	703	20973	207/20973
	GO:0051216	cartilage development	12/703	12/207	0.0467734515902537	0.332337682351803	0.298913066387966	CD44/HMGA2/SLC39A14/ZNF219/COL2A1/ROR2/BMPR1A/CCN1/CTNNB1/CCN2/RFLNB/IFT80	12	207	703	20973	207/20973
	GO:0098727	maintenance of cell number	10/703	10/162	0.0465714905008106	0.332337682351803	0.298913066387966	KLF4/STAT3/LBH/HMGA2/SALL4/PAX2/BMPR1A/CTNNB1/CDH2/LIN28A	10	162	703	20973	162/20973
	GO:0072009	nephron epithelium development	8/703	8/119	0.0469631010543582	0.333211207054715	0.299698736991628	LAMB2/ILK/DCHS1/PAX2/PROM1/LZTS2/CTNNB1/PODXL	8	119	703	20973	119/20973
	GO:0045931	positive regulation of mitotic cell cycle	9/703	9/141	0.048054678509379	0.334536606033377	0.300890834950836	ANXA1/FOXA1/KLHL18/FBXO5/CDCA5/PAFAH1B1/CCND2/CCND1/HSPA2	9	141	703	20973	141/20973
	GO:0045471	response to ethanol	9/703	9/142	0.0498565369369657	0.334536606033377	0.300890834950836	NQO1/MGMT/HPGD/ITPR2/G6PD/ADCY7/SREBF1/CLDN3/CCND1	9	142	703	20973	142/20973
	GO:0019751	polyol metabolic process	8/703	8/120	0.0489114454755618	0.334536606033377	0.300890834950836	INPP5A/ABCA2/SORD/MINPP1/ITPKA/PLPP3/PCBD1/INPP5K	8	120	703	20973	120/20973
	GO:0034440	lipid oxidation	8/703	8/120	0.0489114454755618	0.334536606033377	0.300890834950836	DECR1/EHHADH/MLYCD/IVD/TYSND1/CRAT/ACADVL/ACADL	8	120	703	20973	120/20973
	GO:0019915	lipid storage	7/703	7/99	0.0487193638042582	0.334536606033377	0.300890834950836	ABCA1/CES1/SREBF1/ENPP1/CAV1/APOE/DGAT1	7	99	703	20973	99/20973
	GO:1901019	regulation of calcium ion transmembrane transporter activity	7/703	7/99	0.0487193638042582	0.334536606033377	0.300890834950836	ANK2/CRACR2A/GSTM2/CALM1/JPH1/YWHAE/HSPA2	7	99	703	20973	99/20973
	GO:0033344	cholesterol efflux	6/703	6/79	0.0492417340193369	0.334536606033377	0.300890834950836	ABCA1/ABCA3/CES1/ABCA2/CAV1/APOE	6	79	703	20973	79/20973
	GO:0043113	receptor clustering	5/703	5/60	0.0503171850702251	0.334536606033377	0.300890834950836	THY1/LRP4/SLC7A11/CDH2/APOE	5	60	703	20973	60/20973
	GO:0044380	protein localization to cytoskeleton	5/703	5/60	0.0503171850702251	0.334536606033377	0.300890834950836	FAM83H/MID1/MAP1A/KIF20B/KIAA0753	5	60	703	20973	60/20973
	GO:1903747	regulation of establishment of protein localization to mitochondrion	5/703	5/60	0.0503171850702251	0.334536606033377	0.300890834950836	BAG3/MAPT/UBL5/UBE2L3/SREBF1	5	60	703	20973	60/20973
	GO:0006040	amino sugar metabolic process	4/703	4/41	0.0476554107380165	0.334536606033377	0.300890834950836	GNE/FN3K/UAP1L1/GFPT2	4	41	703	20973	41/20973
	GO:0035136	forelimb morphogenesis	4/703	4/41	0.0476554107380165	0.334536606033377	0.300890834950836	ALDH1A2/TBX5/CTNNB1/CRABP2	4	41	703	20973	41/20973
	GO:0060306	regulation of membrane repolarization	4/703	4/41	0.0476554107380165	0.334536606033377	0.300890834950836	ANK2/YWHAE/CAV1/GJA1	4	41	703	20973	41/20973
	GO:0070841	inclusion body assembly	4/703	4/41	0.0476554107380165	0.334536606033377	0.300890834950836	BAG3/MAPT/CLU/HSPA2	4	41	703	20973	41/20973
	GO:0003148	outflow tract septum morphogenesis	3/703	3/25	0.0498944152414992	0.334536606033377	0.300890834950836	PARVA/NRP1/BMPR1A	3	25	703	20973	25/20973
	GO:0016338	calcium-independent cell-cell adhesion via plasma membrane cell-adhesion molecules	3/703	3/25	0.0498944152414992	0.334536606033377	0.300890834950836	CLDN11/CLDN3/CLDN6	3	25	703	20973	25/20973
	GO:0033233	regulation of protein sumoylation	3/703	3/25	0.0498944152414992	0.334536606033377	0.300890834950836	MAGEA2/ZMIZ1/CTNNB1	3	25	703	20973	25/20973
	GO:0036315	cellular response to sterol	3/703	3/25	0.0498944152414992	0.334536606033377	0.300890834950836	CES1/GRAMD1A/GRAMD1B	3	25	703	20973	25/20973
	GO:0061436	establishment of skin barrier	3/703	3/25	0.0498944152414992	0.334536606033377	0.300890834950836	SFN/PLEC/HRNR	3	25	703	20973	25/20973
	GO:1904666	regulation of ubiquitin protein ligase activity	3/703	3/25	0.0498944152414992	0.334536606033377	0.300890834950836	RPL37/UBE2S/FBXO5	3	25	703	20973	25/20973
	GO:0016311	dephosphorylation	23/703	23/474	0.0497731601560135	0.334536606033377	0.300890834950836	PFKFB2/DUSP23/INPP5F/INPP5A/IGBP1/CALM1/PPP6R2/LRRC40/THTPA/DNAJC6/PPIA/ITGA1/CAMK2G/PTPRU/MINPP1/YWHAE/ALPL/ITGA2/SMG6/PLPP3/INPP5K/PDP2/ALPG	23	474	703	20973	474/20973
	GO:0043434	response to peptide hormone	21/703	21/424	0.0494114149511608	0.334536606033377	0.300890834950836	ANXA1/ASS1/CPS1/STAT3/APRT/GCLC/STAT2/CSK/TGFBR3/SLC39A14/BSG/BAIAP2L1/SRSF6/SREBF1/ENPP1/CAV1/RARRES2/MYO1C/INPP5K/AGTRAP/CCN2	21	424	703	20973	424/20973
	GO:0003174	mitral valve development	2/703	2/11	0.0504986188086419	0.334536606033377	0.300890834950836	DCHS1/BMPR1A	2	11	703	20973	11/20973
	GO:0003263	cardioblast proliferation	2/703	2/11	0.0504986188086419	0.334536606033377	0.300890834950836	TBX5/CTNNB1	2	11	703	20973	11/20973
	GO:0003264	regulation of cardioblast proliferation	2/703	2/11	0.0504986188086419	0.334536606033377	0.300890834950836	TBX5/CTNNB1	2	11	703	20973	11/20973
	GO:0006560	proline metabolic process	2/703	2/11	0.0504986188086419	0.334536606033377	0.300890834950836	PYCR2/ALDH18A1	2	11	703	20973	11/20973
	GO:0006971	hypotonic response	2/703	2/11	0.0504986188086419	0.334536606033377	0.300890834950836	MYLK/ITGA2	2	11	703	20973	11/20973
	GO:0010760	negative regulation of macrophage chemotaxis	2/703	2/11	0.0504986188086419	0.334536606033377	0.300890834950836	DDT/MIF	2	11	703	20973	11/20973
	GO:0021604	cranial nerve structural organization	2/703	2/11	0.0504986188086419	0.334536606033377	0.300890834950836	NRP1/PAX2	2	11	703	20973	11/20973
	GO:0033234	negative regulation of protein sumoylation	2/703	2/11	0.0504986188086419	0.334536606033377	0.300890834950836	MAGEA2/CTNNB1	2	11	703	20973	11/20973
	GO:0035973	aggrephagy	2/703	2/11	0.0504986188086419	0.334536606033377	0.300890834950836	BAG3/WDR81	2	11	703	20973	11/20973
	GO:0042762	regulation of sulfur metabolic process	2/703	2/11	0.0504986188086419	0.334536606033377	0.300890834950836	ABCB7/SLC7A11	2	11	703	20973	11/20973
	GO:0045144	meiotic sister chromatid segregation	2/703	2/11	0.0504986188086419	0.334536606033377	0.300890834950836	BUB1B/BUB1	2	11	703	20973	11/20973
	GO:0046051	UTP metabolic process	2/703	2/11	0.0504986188086419	0.334536606033377	0.300890834950836	NME2/ENTPD7	2	11	703	20973	11/20973
	GO:0051177	meiotic sister chromatid cohesion	2/703	2/11	0.0504986188086419	0.334536606033377	0.300890834950836	BUB1B/BUB1	2	11	703	20973	11/20973
	GO:0051561	positive regulation of mitochondrial calcium ion concentration	2/703	2/11	0.0504986188086419	0.334536606033377	0.300890834950836	MICU1/MICU2	2	11	703	20973	11/20973
	GO:0060272	embryonic skeletal joint morphogenesis	2/703	2/11	0.0504986188086419	0.334536606033377	0.300890834950836	COL2A1/CTNNB1	2	11	703	20973	11/20973
	GO:0060315	negative regulation of ryanodine-sensitive calcium-release channel activity	2/703	2/11	0.0504986188086419	0.334536606033377	0.300890834950836	GSTM2/CALM1	2	11	703	20973	11/20973
	GO:0060920	cardiac pacemaker cell differentiation	2/703	2/11	0.0504986188086419	0.334536606033377	0.300890834950836	TBX5/BMPR1A	2	11	703	20973	11/20973
	GO:0070862	negative regulation of protein exit from endoplasmic reticulum	2/703	2/11	0.0504986188086419	0.334536606033377	0.300890834950836	YOD1/DERL2	2	11	703	20973	11/20973
	GO:0099188	postsynaptic cytoskeleton organization	2/703	2/11	0.0504986188086419	0.334536606033377	0.300890834950836	FARP1/INA	2	11	703	20973	11/20973
	GO:1902946	protein localization to early endosome	2/703	2/11	0.0504986188086419	0.334536606033377	0.300890834950836	NRP1/MSN	2	11	703	20973	11/20973
	GO:1904672	regulation of somatic stem cell population maintenance	2/703	2/11	0.0504986188086419	0.334536606033377	0.300890834950836	LBH/PAX2	2	11	703	20973	11/20973
	GO:1905050	positive regulation of metallopeptidase activity	2/703	2/11	0.0504986188086419	0.334536606033377	0.300890834950836	STAT3/CLDN3	2	11	703	20973	11/20973
	GO:1990034	calcium ion export across plasma membrane	2/703	2/11	0.0504986188086419	0.334536606033377	0.300890834950836	CALM1/YWHAE	2	11	703	20973	11/20973
	GO:2000644	regulation of receptor catabolic process	2/703	2/11	0.0504986188086419	0.334536606033377	0.300890834950836	ABCA2/APOE	2	11	703	20973	11/20973
	GO:1901888	regulation of cell junction assembly	13/703	13/231	0.0482211207622318	0.334536606033377	0.300890834950836	NRP1/LIMS1/TBX5/EPHA2/THY1/FARP1/SDC4/THBS1/LRRN1/LIMCH1/CAV1/MYO1C/CLDN3	13	231	703	20973	231/20973
	GO:0006839	mitochondrial transport	12/703	12/208	0.0481991587929619	0.334536606033377	0.300890834950836	BAG3/UBL5/GCLC/UBE2L3/AGK/GRPEL2/TIMM21/ABCB10/SLC25A16/SPG7/SREBF1/TP53	12	208	703	20973	208/20973
	GO:0110148	biomineralization	11/703	11/185	0.0477032090961107	0.334536606033377	0.300890834950836	FBXO5/FAM83H/MINPP1/ROR2/ALPL/BMPR1A/ENPP1/CCN1/RFLNB/GJA1/IFT80	11	185	703	20973	185/20973
	GO:0010970	transport along microtubule	10/703	10/163	0.0481991133255217	0.334536606033377	0.300890834950836	BAG3/MAPT/TRIM58/IFT27/HSBP1/IFT74/KIF1C/MAP1A/SPG7/PAFAH1B1	10	163	703	20973	163/20973
	GO:0008637	apoptotic mitochondrial changes	8/703	8/121	0.0509115257768682	0.336151223579742	0.302343063534764	SFN/LMNA/GCLC/GGCT/ARRB2/GHITM/CLU/TP53	8	121	703	20973	121/20973
	GO:0071887	leukocyte apoptotic process	8/703	8/121	0.0509115257768682	0.336151223579742	0.302343063534764	ANXA1/HCLS1/MIF/SLC7A11/TP53/FAS/AURKB/ARG2	8	121	703	20973	121/20973
	GO:0001843	neural tube closure	7/703	7/100	0.0509442394894624	0.336151223579742	0.302343063534764	SALL4/PAX2/SDC4/DVL2/KIF20B/CELSR1/SPINT2	7	100	703	20973	100/20973
	GO:0010463	mesenchymal cell proliferation	4/703	4/42	0.0513310604872	0.336481164217275	0.302639820637339	LMNA/DCHS1/BMPR1A/CTNNB1	4	42	703	20973	42/20973
	GO:0044275	cellular carbohydrate catabolic process	4/703	4/42	0.0513310604872	0.336481164217275	0.302639820637339	PFKM/SORD/PGAM1/TP53	4	42	703	20973	42/20973
	GO:1902100	negative regulation of metaphase/anaphase transition of cell cycle	4/703	4/42	0.0513310604872	0.336481164217275	0.302639820637339	FBXO5/BUB1B/BUB1/AURKB	4	42	703	20973	42/20973
	GO:0050731	positive regulation of peptidyl-tyrosine phosphorylation	12/703	12/210	0.0511393312982294	0.336481164217275	0.302639820637339	PARP14/NRP1/CD44/HCLS1/MIF/ARRB2/SRCIN1/DVL2/LRP4/NEDD9/CRLF1/TP53	12	210	703	20973	210/20973
	GO:0051896	regulation of protein kinase B signaling	12/703	12/210	0.0511393312982294	0.336481164217275	0.302639820637339	F3/INPP5F/PLEKHA1/HCLS1/TXN/ARRB2/EPHA2/THBS1/MYORG/INPP5K/C1QBP/LIN28A	12	210	703	20973	210/20973
	GO:1903169	regulation of calcium ion transmembrane transport	10/703	10/165	0.0515678784019759	0.337590501465098	0.303637587114069	ANK2/CRACR2A/GSTM2/CALM1/G6PD/PSEN2/THY1/JPH1/YWHAE/HSPA2	10	165	703	20973	165/20973
	GO:0002685	regulation of leukocyte migration	14/703	14/257	0.0518554261344721	0.339028604112158	0.304931053653799	MYD88/ANXA1/CD9/DDT/MSN/MAPK1/MIF/THY1/JAM2/THBS1/ITGA2/RARRES2/C1QBP/F2RL1	14	257	703	20973	257/20973
	GO:0090150	establishment of protein localization to membrane	15/703	15/281	0.0523284579403774	0.341674048904817	0.307310434798116	CHM/ZDHHC6/CSK/BAG6/AGK/VAMP3/EMC6/ZDHHC18/RFTN1/NECTIN3/ATAD1/KRT18/AKAP5/MYO1C/INPP5K	15	281	703	20973	281/20973
	GO:1902903	regulation of supramolecular fiber organization	21/703	21/427	0.0524857773002255	0.3422538611157	0.307831932825838	NRP1/MAPT/ARHGAP18/HCLS1/TUBB4A/CGNL1/ADD3/BAIAP2L1/TMOD1/LIMA1/MID1/MAP1A/SDC4/SPTBN2/CLU/LIMCH1/APOE/INPP5K/CCN2/F2RL1/ARPIN	21	427	703	20973	427/20973
	GO:0003012	muscle system process	23/703	23/477	0.0526860034939322	0.342664827411707	0.308201566491369	GLRX3/INPP5F/LMNA/ANK2/GSTM2/HSBP1/CALM1/G6PD/CAMK2G/CALD1/PKP2/MYLK/TMOD1/MYL6B/MAP2K3/ITGA2/GNAO1/DSC2/GATM/CAV1/CCN2/GJA1/ARG2	23	477	703	20973	477/20973
	GO:0007179	transforming growth factor beta receptor signaling pathway	12/703	12/211	0.0526542124417939	0.342664827411707	0.308201566491369	FERMT1/HPGD/PML/STAT3/TGFBR3/ARRB2/ZMIZ1/PEG10/THBS1/BMPR1A/TP53/CAV1	12	211	703	20973	211/20973
	GO:0030433	ubiquitin-dependent ERAD pathway	7/703	7/101	0.0532322057566021	0.345287759294067	0.310560698944645	YOD1/UFD1/BAG6/FBXO17/ERLIN1/CAV1/DERL2	7	101	703	20973	101/20973
	GO:0060606	tube closure	7/703	7/101	0.0532322057566021	0.345287759294067	0.310560698944645	SALL4/PAX2/SDC4/DVL2/KIF20B/CELSR1/SPINT2	7	101	703	20973	101/20973
	GO:0030042	actin filament depolymerization	5/703	5/61	0.0533657958308347	0.345287759294067	0.310560698944645	ADD3/TMOD1/LIMA1/SPTBN2/F2RL1	5	61	703	20973	61/20973
	GO:0016052	carbohydrate catabolic process	10/703	10/166	0.053309538495304	0.345287759294067	0.310560698944645	PFKFB2/PGK1/STAT3/PFKM/SORD/PGAM1/ENO3/TP53/MANBA/TKTL1	10	166	703	20973	166/20973
	GO:0060048	cardiac muscle contraction	9/703	9/144	0.0535924125828506	0.3452997435891	0.310571477928092	ANK2/GSTM2/CALM1/PKP2/MAP2K3/DSC2/CAV1/CCN2/GJA1	9	144	703	20973	144/20973
	GO:0051091	positive regulation of DNA-binding transcription factor activity	17/703	17/330	0.0536179477048702	0.3452997435891	0.310571477928092	MYD88/ANXA3/TRIM38/RPS6KA5/TRIM21/FOXA1/STAT3/HCLS1/PRDX3/PPIA/PPRC1/DVL2/CLU/S100A9/CTNNB1/PLPP3/CAV1	17	330	703	20973	330/20973
	GO:0006898	receptor-mediated endocytosis	15/703	15/282	0.0536441643693977	0.3452997435891	0.310571477928092	CD9/SH3GL3/INPP5F/ABCA2/ARRB1/DNAJC6/LDLRAD3/ARRB2/ATAD1/VLDLR/CLU/CAV1/APOE/CD63/H1-1	15	282	703	20973	282/20973
	GO:0031098	stress-activated protein kinase signaling cascade	15/703	15/282	0.0536441643693977	0.3452997435891	0.310571477928092	MYD88/CRACR2A/IGBP1/MAPK1/PPIA/TNIK/ROR2/MID1/MAP2K3/MAP2K4/PAFAH1B1/MINK1/FAS/CCN2/F2RL1	15	282	703	20973	282/20973
	GO:0048844	artery morphogenesis	6/703	6/81	0.0544295567092172	0.346990573124332	0.312092253536621	HPGD/NRP1/ZMIZ1/MYLK/BMPR1A/APOE	6	81	703	20973	81/20973
	GO:0016339	calcium-dependent cell-cell adhesion via plasma membrane cell adhesion molecules	4/703	4/43	0.0551572602724164	0.346990573124332	0.312092253536621	CDH6/DCHS1/PCDHGC3/CDH2	4	43	703	20973	43/20973
	GO:0033046	negative regulation of sister chromatid segregation	4/703	4/43	0.0551572602724164	0.346990573124332	0.312092253536621	FBXO5/BUB1B/BUB1/AURKB	4	43	703	20973	43/20973
	GO:0033048	negative regulation of mitotic sister chromatid segregation	4/703	4/43	0.0551572602724164	0.346990573124332	0.312092253536621	FBXO5/BUB1B/BUB1/AURKB	4	43	703	20973	43/20973
	GO:0043687	post-translational protein modification	4/703	4/43	0.0551572602724164	0.346990573124332	0.312092253536621	FN3K/FOLH1/ABCA2/FN3KRP	4	43	703	20973	43/20973
	GO:2000816	negative regulation of mitotic sister chromatid separation	4/703	4/43	0.0551572602724164	0.346990573124332	0.312092253536621	FBXO5/BUB1B/BUB1/AURKB	4	43	703	20973	43/20973
	GO:0006817	phosphate ion transport	3/703	3/26	0.0550455558458927	0.346990573124332	0.312092253536621	XPR1/SLC25A11/SLC34A2	3	26	703	20973	26/20973
	GO:0009219	pyrimidine deoxyribonucleotide metabolic process	3/703	3/26	0.0550455558458927	0.346990573124332	0.312092253536621	TYMP/DCTPP1/SHMT1	3	26	703	20973	26/20973
	GO:0032967	positive regulation of collagen biosynthetic process	3/703	3/26	0.0550455558458927	0.346990573124332	0.312092253536621	ARRB2/ITGA2/CCN2	3	26	703	20973	26/20973
	GO:0035336	long-chain fatty-acyl-CoA metabolic process	3/703	3/26	0.0550455558458927	0.346990573124332	0.312092253536621	FAR2/ACSL6/DGAT1	3	26	703	20973	26/20973
	GO:0036296	response to increased oxygen levels	3/703	3/26	0.0550455558458927	0.346990573124332	0.312092253536621	PDPN/CAV1/FAS	3	26	703	20973	26/20973
	GO:0046835	carbohydrate phosphorylation	3/703	3/26	0.0550455558458927	0.346990573124332	0.312092253536621	GNE/PFKFB2/PFKM	3	26	703	20973	26/20973
	GO:0072010	glomerular epithelium development	3/703	3/26	0.0550455558458927	0.346990573124332	0.312092253536621	LAMB2/PROM1/PODXL	3	26	703	20973	26/20973
	GO:1900120	regulation of receptor binding	3/703	3/26	0.0550455558458927	0.346990573124332	0.312092253536621	PLCL2/NRP1/ATP2A3	3	26	703	20973	26/20973
	GO:0051098	regulation of binding	20/703	20/404	0.0543524551342581	0.346990573124332	0.312092253536621	KLF4/PLCL2/TRIM21/NRP1/CTBP2/CALM1/EIF3E/ILRUN/TXN/NIBAN2/HMGA2/TGFBR3/ARRB2/ITGA2/CTNNB1/ATP2A3/CAV1/APOE/DHRS7B/AURKB	20	404	703	20973	404/20973
	GO:0042254	ribosome biogenesis	17/703	17/331	0.054847408800563	0.346990573124332	0.312092253536621	ERI2/PIN4/RPS5/RBIS/UTP11/TBL3/MRPL20/WDR18/RRP12/TSR1/PELP1/GEMIN4/SNU13/NOLC1/MYBBP1A/MRM3/C1QBP	17	331	703	20973	331/20973
	GO:1990138	neuron projection extension	11/703	11/189	0.0540643741642985	0.346990573124332	0.312092253536621	CDKL5/ARHGAP4/NRP1/PAK6/MAPT/LAMB2/SHTN1/PAFAH1B1/CTNNB1/APOE/NDN	11	189	703	20973	189/20973
	GO:0090316	positive regulation of intracellular protein transport	10/703	10/167	0.0550897057789916	0.346990573124332	0.312092253536621	SFN/BAG3/UBL5/HCLS1/ANP32B/UBE2L3/KIF20B/YWHAE/AKAP5/MYO1C	10	167	703	20973	167/20973
	GO:0097237	cellular response to toxic substance	9/703	9/145	0.0555269710592675	0.348356199519346	0.31332053306961	NQO1/PRDX3/GSTM2/TXN/MTARC1/TXNDC17/S100A9/APOE/NXN	9	145	703	20973	145/20973
	GO:0006942	regulation of striated muscle contraction	7/703	7/102	0.0555835617651489	0.348356199519346	0.31332053306961	ANK2/GSTM2/CALM1/PKP2/DSC2/CAV1/CCN2	7	102	703	20973	102/20973
	GO:0030516	regulation of axon extension	7/703	7/102	0.0555835617651489	0.348356199519346	0.31332053306961	CDKL5/ARHGAP4/NRP1/MAPT/SHTN1/PAFAH1B1/APOE	7	102	703	20973	102/20973
	GO:0070482	response to oxygen levels	18/703	18/356	0.0556588379652973	0.348390846662481	0.313351695602017	AK4/LMNA/PGK1/PDPN/ITPR2/PML/TGFBR3/HIF1AN/THBS1/ITGA2/DDAH1/ALKBH5/TP53/CAV1/FAS/AGTRAP/CCN2/CLDN3	18	356	703	20973	356/20973
	GO:0006826	iron ion transport	5/703	5/62	0.0565194469644176	0.351137608939385	0.315822204299731	ABCB7/SLC39A14/FTH1/STEAP2/TTYH1	5	62	703	20973	62/20973
	GO:0007405	neuroblast proliferation	5/703	5/62	0.0565194469644176	0.351137608939385	0.315822204299731	TEAD3/CTNNA1/PAFAH1B1/CTNNB1/TP53	5	62	703	20973	62/20973
	GO:0043090	amino acid import	5/703	5/62	0.0565194469644176	0.351137608939385	0.315822204299731	SLC6A11/SLC7A3/SLC43A2/SLC7A11/SLC43A1	5	62	703	20973	62/20973
	GO:0046148	pigment biosynthetic process	5/703	5/62	0.0565194469644176	0.351137608939385	0.315822204299731	DDT/ABCB7/ABCB10/SLC7A11/COX15	5	62	703	20973	62/20973
	GO:0046824	positive regulation of nucleocytoplasmic transport	5/703	5/62	0.0565194469644176	0.351137608939385	0.315822204299731	SFN/BAG3/HCLS1/ANP32B/YWHAE	5	62	703	20973	62/20973
	GO:0051055	negative regulation of lipid biosynthetic process	5/703	5/62	0.0565194469644176	0.351137608939385	0.315822204299731	ABCA2/ERLIN1/APOE/ACADVL/ACADL	5	62	703	20973	62/20973
	GO:0050678	regulation of epithelial cell proliferation	20/703	20/406	0.056599315287762	0.351196993617853	0.315875616408197	ALDH1A2/SFN/F3/NRP1/STAT3/IFT74/NME2/TGFBR3/PAX2/SRSF6/SPARC/THBS1/BMPR1A/EPPK1/MCC/CTNNB1/CAV1/APOE/CCND1/IFT80	20	406	703	20973	406/20973
	GO:0046165	alcohol biosynthetic process	9/703	9/147	0.0595305366916142	0.352269746979284	0.316840478395782	CES1/ABCA2/PMVK/G6PD/ITPKA/ERLIN1/SREBF1/PCBD1/APOE	9	147	703	20973	147/20973
	GO:0033559	unsaturated fatty acid metabolic process	8/703	8/124	0.0572252413926228	0.352269746979284	0.316840478395782	ANXA1/HPGD/AKR1C1/PTGR1/GSTM2/CBR1/MIF/SCD	8	124	703	20973	124/20973
	GO:0036503	ERAD pathway	8/703	8/124	0.0572252413926228	0.352269746979284	0.316840478395782	YOD1/UFD1/BAG6/FBXO17/TOR1A/ERLIN1/CAV1/DERL2	8	124	703	20973	124/20973
	GO:1901216	positive regulation of neuron death	7/703	7/103	0.0579985644214403	0.352269746979284	0.316840478395782	NQO1/MAPT/ITGA1/SARM1/CLU/CTNNB1/TP53	7	103	703	20973	103/20973
	GO:0008088	axo-dendritic transport	6/703	6/83	0.0599357935880101	0.352269746979284	0.316840478395782	MAPT/HSBP1/KIF1C/MAP1A/SPG7/PAFAH1B1	6	83	703	20973	83/20973
	GO:0009205	purine ribonucleoside triphosphate metabolic process	6/703	6/83	0.0599357935880101	0.352269746979284	0.316840478395782	AK4/NUDT2/IMPDH1/NME2/MFN1/ENTPD7	6	83	703	20973	83/20973
	GO:0045669	positive regulation of osteoblast differentiation	6/703	6/83	0.0599357935880101	0.352269746979284	0.316840478395782	ILK/FBXO5/SCUBE3/BMPR1A/CCN1/CTNNB1	6	83	703	20973	83/20973
	GO:0007007	inner mitochondrial membrane organization	4/703	4/44	0.0591330575224793	0.352269746979284	0.316840478395782	AGK/OMA1/TMEM11/GHITM	4	44	703	20973	44/20973
	GO:0009954	proximal/distal pattern formation	4/703	4/44	0.0591330575224793	0.352269746979284	0.316840478395782	ALDH1A2/HOXB9/LRP4/CTNNB1	4	44	703	20973	44/20973
	GO:0006525	arginine metabolic process	3/703	3/27	0.0604394741063556	0.352269746979284	0.316840478395782	ASS1/DDAH1/ARG2	3	27	703	20973	27/20973
	GO:0006929	substrate-dependent cell migration	3/703	3/27	0.0604394741063556	0.352269746979284	0.316840478395782	NRP1/SHTN1/ITGA2	3	27	703	20973	27/20973
	GO:0008535	respiratory chain complex IV assembly	3/703	3/27	0.0604394741063556	0.352269746979284	0.316840478395782	TIMM21/COA6/COX15	3	27	703	20973	27/20973
	GO:0010714	positive regulation of collagen metabolic process	3/703	3/27	0.0604394741063556	0.352269746979284	0.316840478395782	ARRB2/ITGA2/CCN2	3	27	703	20973	27/20973
	GO:0032695	negative regulation of interleukin-12 production	3/703	3/27	0.0604394741063556	0.352269746979284	0.316840478395782	ARRB2/THBS1/C1QBP	3	27	703	20973	27/20973
	GO:0032878	regulation of establishment or maintenance of cell polarity	3/703	3/27	0.0604394741063556	0.352269746979284	0.316840478395782	SHTN1/KIF20B/LLGL1	3	27	703	20973	27/20973
	GO:0033598	mammary gland epithelial cell proliferation	3/703	3/27	0.0604394741063556	0.352269746979284	0.316840478395782	MAPK1/EPHA2/CCND1	3	27	703	20973	27/20973
	GO:0045606	positive regulation of epidermal cell differentiation	3/703	3/27	0.0604394741063556	0.352269746979284	0.316840478395782	SFN/NME2/MACROH2A2	3	27	703	20973	27/20973
	GO:0060314	regulation of ryanodine-sensitive calcium-release channel activity	3/703	3/27	0.0604394741063556	0.352269746979284	0.316840478395782	GSTM2/CALM1/JPH1	3	27	703	20973	27/20973
	GO:0072202	cell differentiation involved in metanephros development	3/703	3/27	0.0604394741063556	0.352269746979284	0.316840478395782	LAMB2/PAX2/CTNNB1	3	27	703	20973	27/20973
	GO:1902254	negative regulation of intrinsic apoptotic signaling pathway by p53 class mediator	3/703	3/27	0.0604394741063556	0.352269746979284	0.316840478395782	CD44/MIF/ZNF385A	3	27	703	20973	27/20973
	GO:2000648	positive regulation of stem cell proliferation	3/703	3/27	0.0604394741063556	0.352269746979284	0.316840478395782	HMGA2/GJA1/EPCAM	3	27	703	20973	27/20973
	GO:0007409	axonogenesis	22/703	22/457	0.0579220045472875	0.352269746979284	0.316840478395782	CDKL5/ARHGAP4/RPS6KA5/NRP1/MAPT/LAMB2/SHTN1/NIBAN2/BSG/PAX2/EPHA2/THY1/MAP1A/LRP4/EFNB3/PAFAH1B1/CDH2/APOE/NEXN/LLGL1/CRABP2/NDN	22	457	703	20973	457/20973
	GO:0001553	luteinization	2/703	2/12	0.0592827449226469	0.352269746979284	0.316840478395782	PLEKHA1/SGPL1	2	12	703	20973	12/20973
	GO:0001967	suckling behavior	2/703	2/12	0.0592827449226469	0.352269746979284	0.316840478395782	CNTFR/DERL2	2	12	703	20973	12/20973
	GO:0007135	meiosis II	2/703	2/12	0.0592827449226469	0.352269746979284	0.316840478395782	BUB1B/BUB1	2	12	703	20973	12/20973
	GO:0007501	mesodermal cell fate specification	2/703	2/12	0.0592827449226469	0.352269746979284	0.316840478395782	PAX2/BMPR1A	2	12	703	20973	12/20973
	GO:0010887	negative regulation of cholesterol storage	2/703	2/12	0.0592827449226469	0.352269746979284	0.316840478395782	ABCA1/CES1	2	12	703	20973	12/20973
	GO:0015937	coenzyme A biosynthetic process	2/703	2/12	0.0592827449226469	0.352269746979284	0.316840478395782	PANK1/SLC25A16	2	12	703	20973	12/20973
	GO:0030948	negative regulation of vascular endothelial growth factor receptor signaling pathway	2/703	2/12	0.0592827449226469	0.352269746979284	0.316840478395782	NIBAN2/EPN2	2	12	703	20973	12/20973
	GO:0033212	iron import into cell	2/703	2/12	0.0592827449226469	0.352269746979284	0.316840478395782	SLC39A14/STEAP2	2	12	703	20973	12/20973
	GO:0035112	genitalia morphogenesis	2/703	2/12	0.0592827449226469	0.352269746979284	0.316840478395782	ROR2/CTNNB1	2	12	703	20973	12/20973
	GO:0036295	cellular response to increased oxygen levels	2/703	2/12	0.0592827449226469	0.352269746979284	0.316840478395782	CAV1/FAS	2	12	703	20973	12/20973
	GO:0043471	regulation of cellular carbohydrate catabolic process	2/703	2/12	0.0592827449226469	0.352269746979284	0.316840478395782	PGAM1/TP53	2	12	703	20973	12/20973
	GO:0043476	pigment accumulation	2/703	2/12	0.0592827449226469	0.352269746979284	0.316840478395782	SHROOM2/CD63	2	12	703	20973	12/20973
	GO:0043482	cellular pigment accumulation	2/703	2/12	0.0592827449226469	0.352269746979284	0.316840478395782	SHROOM2/CD63	2	12	703	20973	12/20973
	GO:0044848	biological phase	2/703	2/12	0.0592827449226469	0.352269746979284	0.316840478395782	FERMT1/CTNNB1	2	12	703	20973	12/20973
	GO:0046322	negative regulation of fatty acid oxidation	2/703	2/12	0.0592827449226469	0.352269746979284	0.316840478395782	ACADVL/ACADL	2	12	703	20973	12/20973
	GO:0051255	spindle midzone assembly	2/703	2/12	0.0592827449226469	0.352269746979284	0.316840478395782	LZTS2/AURKB	2	12	703	20973	12/20973
	GO:0060837	blood vessel endothelial cell differentiation	2/703	2/12	0.0592827449226469	0.352269746979284	0.316840478395782	NRP1/FOXJ2	2	12	703	20973	12/20973
	GO:0061983	meiosis II cell cycle process	2/703	2/12	0.0592827449226469	0.352269746979284	0.316840478395782	BUB1B/BUB1	2	12	703	20973	12/20973
	GO:0070493	thrombin-activated receptor signaling pathway	2/703	2/12	0.0592827449226469	0.352269746979284	0.316840478395782	HPGD/F2RL1	2	12	703	20973	12/20973
	GO:0071377	cellular response to glucagon stimulus	2/703	2/12	0.0592827449226469	0.352269746979284	0.316840478395782	ASS1/CPS1	2	12	703	20973	12/20973
	GO:0072015	glomerular visceral epithelial cell development	2/703	2/12	0.0592827449226469	0.352269746979284	0.316840478395782	LAMB2/PODXL	2	12	703	20973	12/20973
	GO:0072584	caveolin-mediated endocytosis	2/703	2/12	0.0592827449226469	0.352269746979284	0.316840478395782	MAPK1/CAV1	2	12	703	20973	12/20973
	GO:0097104	postsynaptic membrane assembly	2/703	2/12	0.0592827449226469	0.352269746979284	0.316840478395782	LRP4/CDH2	2	12	703	20973	12/20973
	GO:0140289	protein mono-ADP-ribosylation	2/703	2/12	0.0592827449226469	0.352269746979284	0.316840478395782	PARP14/PARP4	2	12	703	20973	12/20973
	GO:1903800	positive regulation of production of miRNAs involved in gene silencing by miRNA	2/703	2/12	0.0592827449226469	0.352269746979284	0.316840478395782	TP53/LIN28A	2	12	703	20973	12/20973
	GO:1903909	regulation of receptor clustering	2/703	2/12	0.0592827449226469	0.352269746979284	0.316840478395782	LRP4/SLC7A11	2	12	703	20973	12/20973
	GO:1904667	negative regulation of ubiquitin protein ligase activity	2/703	2/12	0.0592827449226469	0.352269746979284	0.316840478395782	RPL37/FBXO5	2	12	703	20973	12/20973
	GO:0008202	steroid metabolic process	18/703	18/359	0.0593587157648773	0.352269746979284	0.316840478395782	ABCA1/AKR1C1/CES1/CYB5R2/PLEKHA1/ABCA2/PMVK/G6PD/SGPL1/LIMA1/ERLIN1/SREBF1/VLDLR/APOE/DHRS2/CLN6/ACADVL/ACADL	18	359	703	20973	359/20973
	GO:0062012	regulation of small molecule metabolic process	18/703	18/359	0.0593587157648773	0.352269746979284	0.316840478395782	ANXA1/AK4/PFKFB2/CES1/STAT3/PGAM1/MLYCD/ERLIN1/SREBF1/ENPP1/SLC7A11/TP53/TYSND1/CAV1/APOE/INPP5K/ACADVL/ACADL	18	359	703	20973	359/20973
	GO:1901617	organic hydroxy compound biosynthetic process	14/703	14/262	0.0589607606623907	0.352269746979284	0.316840478395782	DDT/CES1/CYB5R2/ABCA2/PMVK/G6PD/PNPO/ITPKA/ERLIN1/SREBF1/SLC7A11/PCBD1/APOE/ALDH2	14	262	703	20973	262/20973
	GO:0043161	proteasome-mediated ubiquitin-dependent protein catabolic process	22/703	22/460	0.0612577333894996	0.3566228185088	0.320755742984154	TRIM38/YOD1/PRAME/PML/ARRB1/UBE2S/GCLC/UFD1/EIF3H/BAG6/MTA1/ARRB2/FBXO17/FBXW4/TRIM2/MAP1A/ERLIN1/CLU/CTNNB1/CAV1/DERL2/TRIM9	22	460	703	20973	460/20973
	GO:0009612	response to mechanical stimulus	12/703	12/217	0.0623824539571061	0.362747796875139	0.326264706193161	MYD88/TNFRSF10A/BAG3/GCLC/PLEC/THBS1/ITGA2/MAP2K4/CTNNB1/CDH2/FAS/PPL	12	217	703	20973	217/20973
	GO:0010212	response to ionizing radiation	9/703	9/149	0.0637147463976491	0.362926967691002	0.326425857037078	ANXA1/MGMT/PML/MTA1/HMGA2/UIMC1/TNKS1BP1/TP53/CCND1	9	149	703	20973	149/20973
	GO:0048284	organelle fusion	9/703	9/150	0.0658750347508108	0.362926967691002	0.326425857037078	ANXA1/VTI1A/ZDHHC6/VAMP3/MFN1/STX8/OMA1/STXBP6/ANKFY1	9	150	703	20973	150/20973
	GO:0008584	male gonad development	9/703	9/151	0.0680809739577679	0.362926967691002	0.326425857037078	PLEKHA1/NUDT1/RHOBTB3/FNDC3A/SGPL1/CTNNA1/SDC1/GJA1/CCND1	9	151	703	20973	151/20973
	GO:0072175	epithelial tube formation	9/703	9/151	0.0680809739577679	0.362926967691002	0.326425857037078	SALL4/PAX2/SDC4/DVL2/KIF20B/CTNNB1/PODXL/CELSR1/SPINT2	9	151	703	20973	151/20973
	GO:0003206	cardiac chamber morphogenesis	8/703	8/128	0.066384043958011	0.362926967691002	0.326425857037078	PARVA/NRP1/TBX5/TGFBR3/PKP2/BMPR1A/CCN1/TP53	8	128	703	20973	128/20973
	GO:0046683	response to organophosphorus	8/703	8/128	0.066384043958011	0.362926967691002	0.326425857037078	AKR1C1/ASS1/ITPR2/CPS1/BSG/SREBF1/SDC1/INPP5K	8	128	703	20973	128/20973
	GO:0051209	release of sequestered calcium ion into cytosol	8/703	8/128	0.066384043958011	0.362926967691002	0.326425857037078	ITPR2/ANK2/GSTM2/CALM1/IBTK/THY1/JPH1/RASA3	8	128	703	20973	128/20973
	GO:0051283	negative regulation of sequestering of calcium ion	8/703	8/129	0.0688071748555312	0.362926967691002	0.326425857037078	ITPR2/ANK2/GSTM2/CALM1/IBTK/THY1/JPH1/RASA3	8	129	703	20973	129/20973
	GO:0010522	regulation of calcium ion transport into cytosol	7/703	7/105	0.0630203253353729	0.362926967691002	0.326425857037078	PML/ANK2/GSTM2/CALM1/THY1/JPH1/CAV1	7	105	703	20973	105/20973
	GO:0016101	diterpenoid metabolic process	7/703	7/105	0.0630203253353729	0.362926967691002	0.326425857037078	ALDH1A2/AKR1C1/RBP1/ALDH3A2/RARRES2/DGAT1/CRABP2	7	105	703	20973	105/20973
	GO:0050773	regulation of dendrite development	7/703	7/105	0.0630203253353729	0.362926967691002	0.326425857037078	CDKL5/TNIK/ITPKA/SARM1/VLDLR/PAFAH1B1/OBSL1	7	105	703	20973	105/20973
	GO:0014020	primary neural tube formation	7/703	7/106	0.0656273852951426	0.362926967691002	0.326425857037078	SALL4/PAX2/SDC4/DVL2/KIF20B/CELSR1/SPINT2	7	106	703	20973	106/20973
	GO:0036473	cell death in response to oxidative stress	7/703	7/106	0.0656273852951426	0.362926967691002	0.326425857037078	PML/TXN/PPIA/SIGMAR1/DIABLO/SLC7A11/CTNNB1	7	106	703	20973	106/20973
	GO:1901992	positive regulation of mitotic cell cycle phase transition	7/703	7/106	0.0656273852951426	0.362926967691002	0.326425857037078	ANXA1/KLHL18/FBXO5/CDCA5/CCND2/CCND1/HSPA2	7	106	703	20973	106/20973
	GO:0009135	purine nucleoside diphosphate metabolic process	7/703	7/107	0.0682986953462005	0.362926967691002	0.326425857037078	AK4/PFKFB2/PGK1/STAT3/PFKM/PGAM1/ENO3	7	107	703	20973	107/20973
	GO:0009179	purine ribonucleoside diphosphate metabolic process	7/703	7/107	0.0682986953462005	0.362926967691002	0.326425857037078	AK4/PFKFB2/PGK1/STAT3/PFKM/PGAM1/ENO3	7	107	703	20973	107/20973
	GO:0014032	neural crest cell development	6/703	6/84	0.0628086791165175	0.362926967691002	0.326425857037078	ALDH1A2/NRP1/MAPK1/BMPR1A/NOLC1/CDH2	6	84	703	20973	84/20973
	GO:0033273	response to vitamin	6/703	6/84	0.0628086791165175	0.362926967691002	0.326425857037078	MGMT/ALDH1A2/BCHE/ALPL/ITGA2/CCND1	6	84	703	20973	84/20973
	GO:0006096	glycolytic process	6/703	6/85	0.0657614666872855	0.362926967691002	0.326425857037078	PFKFB2/PGK1/STAT3/PFKM/PGAM1/ENO3	6	85	703	20973	85/20973
	GO:0050772	positive regulation of axonogenesis	6/703	6/85	0.0657614666872855	0.362926967691002	0.326425857037078	CDKL5/NRP1/MAPT/SHTN1/PAFAH1B1/CRABP2	6	85	703	20973	85/20973
	GO:0070527	platelet aggregation	6/703	6/85	0.0657614666872855	0.362926967691002	0.326425857037078	CD9/PDPN/ILK/PPIA/SLC7A11/GNAS	6	85	703	20973	85/20973
	GO:2000573	positive regulation of DNA biosynthetic process	6/703	6/85	0.0657614666872855	0.362926967691002	0.326425857037078	KLF4/MAPK1/WRAP53/ARRB2/CTNNB1/AURKB	6	85	703	20973	85/20973
	GO:0006757	ATP generation from ADP	6/703	6/86	0.0687941154428611	0.362926967691002	0.326425857037078	PFKFB2/PGK1/STAT3/PFKM/PGAM1/ENO3	6	86	703	20973	86/20973
	GO:0034394	protein localization to cell surface	6/703	6/86	0.0687941154428611	0.362926967691002	0.326425857037078	ANK2/ABCA2/PTPRU/TOR1A/MAP1A/CTNNB1	6	86	703	20973	86/20973
	GO:0042440	pigment metabolic process	6/703	6/86	0.0687941154428611	0.362926967691002	0.326425857037078	DDT/BLVRB/ABCB7/ABCB10/SLC7A11/COX15	6	86	703	20973	86/20973
	GO:0048145	regulation of fibroblast proliferation	6/703	6/86	0.0687941154428611	0.362926967691002	0.326425857037078	PML/MIF/ZMIZ1/FTH1/CTNNB1/TP53	6	86	703	20973	86/20973
	GO:0006879	cellular iron ion homeostasis	5/703	5/65	0.0666093036444589	0.362926967691002	0.326425857037078	GLRX3/ABCB7/SLC39A14/FTH1/STEAP2	5	65	703	20973	65/20973
	GO:0048645	animal organ formation	5/703	5/65	0.0666093036444589	0.362926967691002	0.326425857037078	MAPK1/TBX5/PAX2/BMPR1A/CTNNB1	5	65	703	20973	65/20973
	GO:0016572	histone phosphorylation	4/703	4/45	0.0632572645082652	0.362926967691002	0.326425857037078	RPS6KA5/HMGA2/HASPIN/AURKB	4	45	703	20973	45/20973
	GO:0051985	negative regulation of chromosome segregation	4/703	4/45	0.0632572645082652	0.362926967691002	0.326425857037078	FBXO5/BUB1B/BUB1/AURKB	4	45	703	20973	45/20973
	GO:1905819	negative regulation of chromosome separation	4/703	4/45	0.0632572645082652	0.362926967691002	0.326425857037078	FBXO5/BUB1B/BUB1/AURKB	4	45	703	20973	45/20973
	GO:2000249	regulation of actin cytoskeleton reorganization	4/703	4/45	0.0632572645082652	0.362926967691002	0.326425857037078	NRP1/ARHGDIA/HCLS1/BAIAP2L1	4	45	703	20973	45/20973
	GO:0010799	regulation of peptidyl-threonine phosphorylation	4/703	4/46	0.0675284690009882	0.362926967691002	0.326425857037078	CALM1/MAPK1/TNKS1BP1/INPP5K	4	46	703	20973	46/20973
	GO:0019692	deoxyribose phosphate metabolic process	4/703	4/46	0.0675284690009882	0.362926967691002	0.326425857037078	TYMP/PGM2/DCTPP1/SHMT1	4	46	703	20973	46/20973
	GO:0031952	regulation of protein autophosphorylation	4/703	4/46	0.0675284690009882	0.362926967691002	0.326425857037078	CALM1/ENPP1/TNKS1BP1/CAV1	4	46	703	20973	46/20973
	GO:0033047	regulation of mitotic sister chromatid segregation	4/703	4/46	0.0675284690009882	0.362926967691002	0.326425857037078	FBXO5/BUB1B/BUB1/AURKB	4	46	703	20973	46/20973
	GO:0060795	cell fate commitment involved in formation of primary germ layer	4/703	4/46	0.0675284690009882	0.362926967691002	0.326425857037078	KLF4/PAX2/BMPR1A/CTNNB1	4	46	703	20973	46/20973
	GO:1900181	negative regulation of protein localization to nucleus	4/703	4/46	0.0675284690009882	0.362926967691002	0.326425857037078	FERMT1/ILRUN/CTNNA1/LZTS2	4	46	703	20973	46/20973
	GO:0001958	endochondral ossification	3/703	3/28	0.0660702241602772	0.362926967691002	0.326425857037078	COL2A1/ALPL/IFT80	3	28	703	20973	28/20973
	GO:0010882	regulation of cardiac muscle contraction by calcium ion signaling	3/703	3/28	0.0660702241602772	0.362926967691002	0.326425857037078	ANK2/GSTM2/CALM1	3	28	703	20973	28/20973
	GO:0036075	replacement ossification	3/703	3/28	0.0660702241602772	0.362926967691002	0.326425857037078	COL2A1/ALPL/IFT80	3	28	703	20973	28/20973
	GO:0046174	polyol catabolic process	3/703	3/28	0.0660702241602772	0.362926967691002	0.326425857037078	INPP5A/SORD/INPP5K	3	28	703	20973	28/20973
	GO:0051560	mitochondrial calcium ion homeostasis	3/703	3/28	0.0660702241602772	0.362926967691002	0.326425857037078	PDZD8/MICU1/MICU2	3	28	703	20973	28/20973
	GO:1904353	regulation of telomere capping	3/703	3/28	0.0660702241602772	0.362926967691002	0.326425857037078	MAPK1/SMG6/AURKB	3	28	703	20973	28/20973
	GO:1905523	positive regulation of macrophage migration	3/703	3/28	0.0660702241602772	0.362926967691002	0.326425857037078	MAPK1/THBS1/RARRES2	3	28	703	20973	28/20973
	GO:0010876	lipid localization	23/703	23/488	0.0644100118158324	0.362926967691002	0.326425857037078	ANXA1/ABCA1/ABCA3/PDZD8/AKR1C1/CES1/RBP1/ABCA2/PITPNC1/MIF/SIGMAR1/LIMA1/GRAMD1A/GRAMD1B/THBS1/SREBF1/VLDLR/ENPP1/CLU/CAV1/APOE/DGAT1/CRABP2	23	488	703	20973	488/20973
	GO:0045936	negative regulation of phosphate metabolic process	23/703	23/491	0.0679004612611244	0.362926967691002	0.326425857037078	PARP14/SFN/INPP5F/MAPT/ABCA2/STAT3/PRDX3/CALM1/PLEC/CSK/PPIA/ARRB2/IBTK/THY1/SRCIN1/YWHAE/ENPP1/SMCR8/PLPP3/TP53/CAV1/APOE/INPP5K	23	491	703	20973	491/20973
	GO:0001503	ossification	22/703	22/462	0.0635549324536491	0.362926967691002	0.326425857037078	MAPK1/ID3/ILK/FBXO5/DCHS1/MINPP1/COL2A1/EPHA2/SCUBE3/ROR2/ALPL/BMPR1A/LRP4/ENPP1/CCN1/MRC2/CTNNB1/MYBBP1A/CCN2/RFLNB/GJA1/IFT80	22	462	703	20973	462/20973
	GO:0072594	establishment of protein localization to organelle	22/703	22/463	0.0647257557391935	0.362926967691002	0.326425857037078	FERMT1/BAG3/LMNA/PML/MAPT/UBL5/STAT3/HCLS1/NXT2/SNUPN/UBE2L3/BAG6/AGK/GRPEL2/TIMM21/WRAP53/SREBF1/NOLC1/CLU/TP53/MACROH2A2/RGPD1	22	463	703	20973	463/20973
	GO:0042326	negative regulation of phosphorylation	20/703	20/413	0.0649758928353537	0.362926967691002	0.326425857037078	PARP14/SFN/INPP5F/MAPT/STAT3/PRDX3/CALM1/PLEC/CSK/PPIA/ARRB2/IBTK/THY1/SRCIN1/ENPP1/SMCR8/PLPP3/CAV1/APOE/INPP5K	20	413	703	20973	413/20973
	GO:0002024	diet induced thermogenesis	2/703	2/13	0.0685449537036164	0.362926967691002	0.326425857037078	OMA1/UCP1	2	13	703	20973	13/20973
	GO:0006000	fructose metabolic process	2/703	2/13	0.0685449537036164	0.362926967691002	0.326425857037078	PFKFB2/SORD	2	13	703	20973	13/20973
	GO:0009133	nucleoside diphosphate biosynthetic process	2/703	2/13	0.0685449537036164	0.362926967691002	0.326425857037078	AK4/UMPS	2	13	703	20973	13/20973
	GO:0009437	carnitine metabolic process	2/703	2/13	0.0685449537036164	0.362926967691002	0.326425857037078	CRAT/ACADL	2	13	703	20973	13/20973
	GO:0010635	regulation of mitochondrial fusion	2/703	2/13	0.0685449537036164	0.362926967691002	0.326425857037078	ZDHHC6/OMA1	2	13	703	20973	13/20973
	GO:0015803	branched-chain amino acid transport	2/703	2/13	0.0685449537036164	0.362926967691002	0.326425857037078	SLC43A2/SLC43A1	2	13	703	20973	13/20973
	GO:0031053	primary miRNA processing	2/703	2/13	0.0685449537036164	0.362926967691002	0.326425857037078	STAT3/PUS10	2	13	703	20973	13/20973
	GO:0031953	negative regulation of protein autophosphorylation	2/703	2/13	0.0685449537036164	0.362926967691002	0.326425857037078	ENPP1/CAV1	2	13	703	20973	13/20973
	GO:0033540	fatty acid beta-oxidation using acyl-CoA oxidase	2/703	2/13	0.0685449537036164	0.362926967691002	0.326425857037078	EHHADH/CRAT	2	13	703	20973	13/20973
	GO:0042135	neurotransmitter catabolic process	2/703	2/13	0.0685449537036164	0.362926967691002	0.326425857037078	BCHE/ALDH5A1	2	13	703	20973	13/20973
	GO:0042541	hemoglobin biosynthetic process	2/703	2/13	0.0685449537036164	0.362926967691002	0.326425857037078	KLF4/ABCB10	2	13	703	20973	13/20973
	GO:0048548	regulation of pinocytosis	2/703	2/13	0.0685449537036164	0.362926967691002	0.326425857037078	ANKFY1/CAV1	2	13	703	20973	13/20973
	GO:0051280	negative regulation of release of sequestered calcium ion into cytosol	2/703	2/13	0.0685449537036164	0.362926967691002	0.326425857037078	GSTM2/CALM1	2	13	703	20973	13/20973
	GO:0060009	Sertoli cell development	2/703	2/13	0.0685449537036164	0.362926967691002	0.326425857037078	FNDC3A/SDC1	2	13	703	20973	13/20973
	GO:0060019	radial glial cell differentiation	2/703	2/13	0.0685449537036164	0.362926967691002	0.326425857037078	STAT3/CDH2	2	13	703	20973	13/20973
	GO:0060100	positive regulation of phagocytosis, engulfment	2/703	2/13	0.0685449537036164	0.362926967691002	0.326425857037078	ITGA2/F2RL1	2	13	703	20973	13/20973
	GO:0060174	limb bud formation	2/703	2/13	0.0685449537036164	0.362926967691002	0.326425857037078	ZNF219/COL2A1	2	13	703	20973	13/20973
	GO:0061517	macrophage proliferation	2/703	2/13	0.0685449537036164	0.362926967691002	0.326425857037078	MAPK1/CLU	2	13	703	20973	13/20973
	GO:0070944	neutrophil-mediated killing of bacterium	2/703	2/13	0.0685449537036164	0.362926967691002	0.326425857037078	MYD88/F2RL1	2	13	703	20973	13/20973
	GO:0071361	cellular response to ethanol	2/703	2/13	0.0685449537036164	0.362926967691002	0.326425857037078	ITPR2/ADCY7	2	13	703	20973	13/20973
	GO:0071696	ectodermal placode development	2/703	2/13	0.0685449537036164	0.362926967691002	0.326425857037078	NRP1/CTNNB1	2	13	703	20973	13/20973
	GO:0072148	epithelial cell fate commitment	2/703	2/13	0.0685449537036164	0.362926967691002	0.326425857037078	PDPN/NRP1	2	13	703	20973	13/20973
	GO:0072310	glomerular epithelial cell development	2/703	2/13	0.0685449537036164	0.362926967691002	0.326425857037078	LAMB2/PODXL	2	13	703	20973	13/20973
	GO:0090153	regulation of sphingolipid biosynthetic process	2/703	2/13	0.0685449537036164	0.362926967691002	0.326425857037078	ABCA2/CCN1	2	13	703	20973	13/20973
	GO:0090205	positive regulation of cholesterol metabolic process	2/703	2/13	0.0685449537036164	0.362926967691002	0.326425857037078	CES1/SREBF1	2	13	703	20973	13/20973
	GO:0098840	protein transport along microtubule	2/703	2/13	0.0685449537036164	0.362926967691002	0.326425857037078	BAG3/MAP1A	2	13	703	20973	13/20973
	GO:0099118	microtubule-based protein transport	2/703	2/13	0.0685449537036164	0.362926967691002	0.326425857037078	BAG3/MAP1A	2	13	703	20973	13/20973
	GO:1905038	regulation of membrane lipid metabolic process	2/703	2/13	0.0685449537036164	0.362926967691002	0.326425857037078	ABCA2/CCN1	2	13	703	20973	13/20973
	GO:1905155	positive regulation of membrane invagination	2/703	2/13	0.0685449537036164	0.362926967691002	0.326425857037078	ITGA2/F2RL1	2	13	703	20973	13/20973
	GO:0060828	regulation of canonical Wnt signaling pathway	14/703	14/268	0.0683234053108151	0.362926967691002	0.326425857037078	FERMT1/AMER1/ILK/PTPRU/ROR2/LRP4/LZTS2/CTNND1/MCC/CTNNB1/CDH2/CAV1/APOE/TMEM88	14	268	703	20973	268/20973
	GO:0033044	regulation of chromosome organization	13/703	13/243	0.0665165121018587	0.362926967691002	0.326425857037078	PML/MAPT/MAPK1/RESF1/FBXO5/CDCA5/BUB1B/SLF2/BUB1/SMG6/CTNNB1/AURKB/CENPV	13	243	703	20973	243/20973
	GO:0042180	cellular ketone metabolic process	12/703	12/218	0.0641118765633994	0.362926967691002	0.326425857037078	ANXA1/AKR1C1/CES1/CBR1/MLYCD/ERLIN1/SREBF1/SLC7A11/TYSND1/CAV1/ACADVL/ACADL	12	218	703	20973	218/20973
	GO:0032872	regulation of stress-activated MAPK cascade	12/703	12/219	0.0658725631723284	0.362926967691002	0.326425857037078	MYD88/CRACR2A/IGBP1/MAPK1/PPIA/TNIK/MID1/PAFAH1B1/MINK1/FAS/CCN2/F2RL1	12	219	703	20973	219/20973
	GO:0035966	response to topologically incorrect protein	11/703	11/194	0.0627815321636582	0.362926967691002	0.326425857037078	YOD1/BAG3/UFD1/BAG6/ABCB10/TOR1A/THBS1/CLU/DERL2/CCND1/HSPA2	11	194	703	20973	194/20973
	GO:0031345	negative regulation of cell projection organization	11/703	11/195	0.0646289041442358	0.362926967691002	0.326425857037078	ARHGAP4/INPP5F/NRP1/THY1/ITM2C/LRP4/EFNB3/PAFAH1B1/RTN4RL2/APOE/ARPIN	11	195	703	20973	195/20973
	GO:1901991	negative regulation of mitotic cell cycle phase transition	11/703	11/195	0.0646289041442358	0.362926967691002	0.326425857037078	SLFN11/KLF4/PML/FBXO5/HMGA2/UIMC1/BUB1B/BUB1/TP53/AURKB/CCND1	11	195	703	20973	195/20973
	GO:0003205	cardiac chamber development	10/703	10/172	0.064575485244594	0.362926967691002	0.326425857037078	PARVA/NRP1/ANK2/TBX5/TGFBR3/SALL4/PKP2/BMPR1A/CCN1/TP53	10	172	703	20973	172/20973
	GO:0051168	nuclear export	10/703	10/174	0.0686460685891947	0.362926967691002	0.326425857037078	SFN/BAG3/NXF2/TXN/ANP32B/YWHAE/LZTS2/ALKBH5/NCBP3/SMG6	10	174	703	20973	174/20973
	GO:0010563	negative regulation of phosphorus metabolic process	23/703	23/492	0.0690924869609433	0.364047439208768	0.327433637962809	PARP14/SFN/INPP5F/MAPT/ABCA2/STAT3/PRDX3/CALM1/PLEC/CSK/PPIA/ARRB2/IBTK/THY1/SRCIN1/YWHAE/ENPP1/SMCR8/PLPP3/TP53/CAV1/APOE/INPP5K	23	492	703	20973	492/20973
	GO:0035967	cellular response to topologically incorrect protein	9/703	9/152	0.0703326848626549	0.367825486127898	0.330831710614587	YOD1/BAG3/UFD1/BAG6/ABCB10/TOR1A/DERL2/CCND1/HSPA2	9	152	703	20973	152/20973
	GO:0046546	development of primary male sexual characteristics	9/703	9/152	0.0703326848626549	0.367825486127898	0.330831710614587	PLEKHA1/NUDT1/RHOBTB3/FNDC3A/SGPL1/CTNNA1/SDC1/GJA1/CCND1	9	152	703	20973	152/20973
	GO:2001235	positive regulation of apoptotic signaling pathway	9/703	9/152	0.0703326848626549	0.367825486127898	0.330831710614587	PML/ITM2C/THBS1/CTNNA1/S100A9/TNFRSF12A/TP53/CAV1/FAS	9	152	703	20973	152/20973
	GO:0072329	monocarboxylic acid catabolic process	8/703	8/130	0.071283907836278	0.367825486127898	0.330831710614587	DECR1/EHHADH/MLYCD/IVD/TYSND1/CRAT/ACADVL/ACADL	8	130	703	20973	130/20973
	GO:2000177	regulation of neural precursor cell proliferation	6/703	6/87	0.0719065182430294	0.367825486127898	0.330831710614587	ILK/CTNNA1/CTNNB1/TP53/CDH2/SPINT2	6	87	703	20973	87/20973
	GO:0008347	glial cell migration	5/703	5/66	0.0701811907168898	0.367825486127898	0.330831710614587	CD9/ZMIZ1/PAFAH1B1/CTNNB1/NDN	5	66	703	20973	66/20973
	GO:0046686	response to cadmium ion	5/703	5/66	0.0701811907168898	0.367825486127898	0.330831710614587	MT2A/GCLC/MAPK1/SORD/NUDT1	5	66	703	20973	66/20973
	GO:0061951	establishment of protein localization to plasma membrane	5/703	5/66	0.0701811907168898	0.367825486127898	0.330831710614587	CSK/VAMP3/NECTIN3/KRT18/AKAP5	5	66	703	20973	66/20973
	GO:0030835	negative regulation of actin filament depolymerization	4/703	4/47	0.0719450450344256	0.367825486127898	0.330831710614587	ADD3/TMOD1/LIMA1/SPTBN2	4	47	703	20973	47/20973
	GO:0070849	response to epidermal growth factor	4/703	4/47	0.0719450450344256	0.367825486127898	0.330831710614587	MAPK1/PAX2/INPP5K/NCL	4	47	703	20973	47/20973
	GO:0072091	regulation of stem cell proliferation	4/703	4/47	0.0719450450344256	0.367825486127898	0.330831710614587	FERMT1/HMGA2/GJA1/EPCAM	4	47	703	20973	47/20973
	GO:0000469	cleavage involved in rRNA processing	3/703	3/29	0.0719314485677288	0.367825486127898	0.330831710614587	ERI2/TBL3/TSR1	3	29	703	20973	29/20973
	GO:0008053	mitochondrial fusion	3/703	3/29	0.0719314485677288	0.367825486127898	0.330831710614587	ZDHHC6/MFN1/OMA1	3	29	703	20973	29/20973
	GO:0009218	pyrimidine ribonucleotide metabolic process	3/703	3/29	0.0719314485677288	0.367825486127898	0.330831710614587	UMPS/NME2/ENTPD7	3	29	703	20973	29/20973
	GO:0010464	regulation of mesenchymal cell proliferation	3/703	3/29	0.0719314485677288	0.367825486127898	0.330831710614587	LMNA/BMPR1A/CTNNB1	3	29	703	20973	29/20973
	GO:0010800	positive regulation of peptidyl-threonine phosphorylation	3/703	3/29	0.0719314485677288	0.367825486127898	0.330831710614587	CALM1/MAPK1/TNKS1BP1	3	29	703	20973	29/20973
	GO:0010971	positive regulation of G2/M transition of mitotic cell cycle	3/703	3/29	0.0719314485677288	0.367825486127898	0.330831710614587	FBXO5/CCND1/HSPA2	3	29	703	20973	29/20973
	GO:0017145	stem cell division	3/703	3/29	0.0719314485677288	0.367825486127898	0.330831710614587	TIAL1/LBH/PAFAH1B1	3	29	703	20973	29/20973
	GO:0018904	ether metabolic process	3/703	3/29	0.0719314485677288	0.367825486127898	0.330831710614587	TXN/PAFAH1B1/DHRS7B	3	29	703	20973	29/20973
	GO:0030970	retrograde protein transport, ER to cytosol	3/703	3/29	0.0719314485677288	0.367825486127898	0.330831710614587	YOD1/UFD1/DERL2	3	29	703	20973	29/20973
	GO:0031571	mitotic G1 DNA damage checkpoint signaling	3/703	3/29	0.0719314485677288	0.367825486127898	0.330831710614587	PML/TP53/CCND1	3	29	703	20973	29/20973
	GO:0043153	entrainment of circadian clock by photoperiod	3/703	3/29	0.0719314485677288	0.367825486127898	0.330831710614587	PML/MTA1/TP53	3	29	703	20973	29/20973
	GO:0046426	negative regulation of receptor signaling pathway via JAK-STAT	3/703	3/29	0.0719314485677288	0.367825486127898	0.330831710614587	PARP14/INPP5F/CAV1	3	29	703	20973	29/20973
	GO:0090312	positive regulation of protein deacetylation	3/703	3/29	0.0719314485677288	0.367825486127898	0.330831710614587	SREBF1/TP53/NDN	3	29	703	20973	29/20973
	GO:1901798	positive regulation of signal transduction by p53 class mediator	3/703	3/29	0.0719314485677288	0.367825486127898	0.330831710614587	RPL37/PML/ZNF385A	3	29	703	20973	29/20973
	GO:1903513	endoplasmic reticulum to cytosol transport	3/703	3/29	0.0719314485677288	0.367825486127898	0.330831710614587	YOD1/UFD1/DERL2	3	29	703	20973	29/20973
	GO:1903779	regulation of cardiac conduction	3/703	3/29	0.0719314485677288	0.367825486127898	0.330831710614587	ANK2/TBX5/ATP2A3	3	29	703	20973	29/20973
	GO:0048738	cardiac muscle tissue development	13/703	13/245	0.0699572083889874	0.367825486127898	0.330831710614587	ALDH1A2/LMNA/PLEC/G6PD/TBX5/TGFBR3/ARRB2/PKP2/CXADR/KDM6B/BMPR1A/OBSL1/GJA1	13	245	703	20973	245/20973
	GO:0070302	regulation of stress-activated protein kinase signaling cascade	12/703	12/222	0.0713434351743587	0.367825486127898	0.330831710614587	MYD88/CRACR2A/IGBP1/MAPK1/PPIA/TNIK/MID1/PAFAH1B1/MINK1/FAS/CCN2/F2RL1	12	222	703	20973	222/20973
	GO:0048732	gland development	22/703	22/469	0.0720659083338355	0.367894303735348	0.330893606942198	ANXA1/MGMT/ALDH1A2/ASS1/CPS1/PML/NRP1/FOXA1/MSN/APRT/LBH/MAPK1/UMPS/TGFBR3/EPHA2/HOXB9/ITGA2/BMPR1A/CTNNB1/CAV1/GJA1/CCND1	22	469	703	20973	469/20973
	GO:0016050	vesicle organization	16/703	16/319	0.072105810481863	0.367894303735348	0.330893606942198	ANXA1/ABCA1/VTI1A/FBXO5/CHMP1A/VAMP3/STX8/STXBP6/SHROOM2/SDC4/ANKFY1/PAFAH1B1/CAV1/SDC1/ZNF385A/HOOK1	16	319	703	20973	319/20973
	GO:0051053	negative regulation of DNA metabolic process	9/703	9/153	0.0726302677577836	0.370192028010336	0.332960239302063	SLFN11/S100A11/NIBAN2/FBXO5/HMGA2/SMG6/TP53/H1-6/H1-1	9	153	703	20973	153/20973
	GO:0110053	regulation of actin filament organization	15/703	15/295	0.0728594568225323	0.370688988441156	0.333407218306065	NRP1/ARHGAP18/HCLS1/CGNL1/ADD3/BAIAP2L1/TMOD1/LIMA1/SDC4/SPTBN2/LIMCH1/INPP5K/CCN2/F2RL1/ARPIN	15	295	703	20973	295/20973
	GO:0030856	regulation of epithelial cell differentiation	10/703	10/176	0.0728761935233664	0.370688988441156	0.333407218306065	SFN/FOXJ2/NME2/PAX2/SRSF6/PROM1/CTNNB1/CAV1/MACROH2A2/CCND1	10	176	703	20973	176/20973
	GO:0048588	developmental cell growth	13/703	13/247	0.0735123772986164	0.373544582509246	0.335975613118268	CDKL5/ARHGAP4/NRP1/PAK6/MAPT/LAMB2/SHTN1/G6PD/PAFAH1B1/CTNNB1/APOE/CRABP2/NDN	13	247	703	20973	247/20973
	GO:0051282	regulation of sequestering of calcium ion	8/703	8/131	0.0738143076205308	0.374352336326381	0.336702127694219	ITPR2/ANK2/GSTM2/CALM1/IBTK/THY1/JPH1/RASA3	8	131	703	20973	131/20973
	GO:0050900	leukocyte migration	21/703	21/445	0.0738212314877849	0.374352336326381	0.336702127694219	MYD88/ANXA1/CD9/DDT/MSN/MAPK1/PLEC/MIF/PPIA/BSG/ITGA1/CXADR/THY1/ROR2/JAM2/THBS1/ITGA2/S100A9/RARRES2/C1QBP/F2RL1	21	445	703	20973	445/20973
	GO:2000146	negative regulation of cell motility	19/703	19/395	0.0743641680311366	0.376723143322036	0.338834492534313	KLF4/ARHGAP4/DDT/STAT3/MIF/TBX5/PTPRU/THY1/THBS1/BMPR1A/CTNNA1/EPPK1/MCC/LIMCH1/APOE/GJA1/CLDN3/SPINT2/ARPIN	19	395	703	20973	395/20973
	GO:0009144	purine nucleoside triphosphate metabolic process	6/703	6/88	0.0750985024356942	0.378523733265684	0.340453989479572	AK4/NUDT2/IMPDH1/NME2/MFN1/ENTPD7	6	88	703	20973	88/20973
	GO:0010833	telomere maintenance via telomere lengthening	6/703	6/88	0.0750985024356942	0.378523733265684	0.340453989479572	MAPK1/WRAP53/SMG6/CTNNB1/TNKS1BP1/AURKB	6	88	703	20973	88/20973
	GO:0048144	fibroblast proliferation	6/703	6/88	0.0750985024356942	0.378523733265684	0.340453989479572	PML/MIF/ZMIZ1/FTH1/CTNNB1/TP53	6	88	703	20973	88/20973
	GO:0050688	regulation of defense response to virus	6/703	6/88	0.0750985024356942	0.378523733265684	0.340453989479572	TSPAN6/TRIM38/ILRUN/UFD1/MICB/C1QBP	6	88	703	20973	88/20973
	GO:2001020	regulation of response to DNA damage stimulus	14/703	14/272	0.0750837551197853	0.378523733265684	0.340453989479572	MGMT/PML/CD44/MAPT/FBXO5/MIF/HMGA2/UIMC1/WRAP53/SLF2/CLU/TP53/FXR2/ZNF385A	14	272	703	20973	272/20973
	GO:1901796	regulation of signal transduction by p53 class mediator	7/703	7/110	0.0766983646344452	0.382656211564573	0.344170846837911	RPL37/PML/CD44/MIF/TP53/AURKB/ZNF385A	7	110	703	20973	110/20973
	GO:0014031	mesenchymal cell development	6/703	6/89	0.0783698307168284	0.382656211564573	0.344170846837911	ALDH1A2/NRP1/MAPK1/BMPR1A/NOLC1/CDH2	6	89	703	20973	89/20973
	GO:0048678	response to axon injury	6/703	6/89	0.0783698307168284	0.382656211564573	0.344170846837911	KLF4/INPP5F/LAMB2/SARM1/CTNNA1/RTN4RL2	6	89	703	20973	89/20973
	GO:0006611	protein export from nucleus	5/703	5/68	0.0776348191551798	0.382656211564573	0.344170846837911	SFN/BAG3/TXN/ANP32B/YWHAE	5	68	703	20973	68/20973
	GO:0010171	body morphogenesis	4/703	4/48	0.0765051637222822	0.382656211564573	0.344170846837911	PLEKHA1/PHLDB1/SGPL1/CRISPLD1	4	48	703	20973	48/20973
	GO:0060119	inner ear receptor cell development	4/703	4/48	0.0765051637222822	0.382656211564573	0.344170846837911	GABRA5/IFT27/SDC4/PAFAH1B1	4	48	703	20973	48/20973
	GO:2000008	regulation of protein localization to cell surface	4/703	4/48	0.0765051637222822	0.382656211564573	0.344170846837911	ABCA2/TOR1A/MAP1A/CTNNB1	4	48	703	20973	48/20973
	GO:0001945	lymph vessel development	3/703	3/30	0.0780164303537775	0.382656211564573	0.344170846837911	LGALS8/PDPN/EPHA2	3	30	703	20973	30/20973
	GO:0006760	folic acid-containing compound metabolic process	3/703	3/30	0.0780164303537775	0.382656211564573	0.344170846837911	FOLH1/SLC25A32/SHMT1	3	30	703	20973	30/20973
	GO:0007064	mitotic sister chromatid cohesion	3/703	3/30	0.0780164303537775	0.382656211564573	0.344170846837911	CDCA5/SLF2/HASPIN	3	30	703	20973	30/20973
	GO:0019359	nicotinamide nucleotide biosynthetic process	3/703	3/30	0.0780164303537775	0.382656211564573	0.344170846837911	NAPRT/NUDT12/NADK	3	30	703	20973	30/20973
	GO:0019363	pyridine nucleotide biosynthetic process	3/703	3/30	0.0780164303537775	0.382656211564573	0.344170846837911	NAPRT/NUDT12/NADK	3	30	703	20973	30/20973
	GO:0033032	regulation of myeloid cell apoptotic process	3/703	3/30	0.0780164303537775	0.382656211564573	0.344170846837911	ANXA1/MIF/SLC7A11	3	30	703	20973	30/20973
	GO:0033561	regulation of water loss via skin	3/703	3/30	0.0780164303537775	0.382656211564573	0.344170846837911	SFN/PLEC/HRNR	3	30	703	20973	30/20973
	GO:0043931	ossification involved in bone maturation	3/703	3/30	0.0780164303537775	0.382656211564573	0.344170846837911	DCHS1/RFLNB/IFT80	3	30	703	20973	30/20973
	GO:0044819	mitotic G1/S transition checkpoint signaling	3/703	3/30	0.0780164303537775	0.382656211564573	0.344170846837911	PML/TP53/CCND1	3	30	703	20973	30/20973
	GO:0045737	positive regulation of cyclin-dependent protein serine/threonine kinase activity	3/703	3/30	0.0780164303537775	0.382656211564573	0.344170846837911	CKS1B/CCND2/CCND1	3	30	703	20973	30/20973
	GO:0045939	negative regulation of steroid metabolic process	3/703	3/30	0.0780164303537775	0.382656211564573	0.344170846837911	ABCA2/ERLIN1/APOE	3	30	703	20973	30/20973
	GO:0046386	deoxyribose phosphate catabolic process	3/703	3/30	0.0780164303537775	0.382656211564573	0.344170846837911	TYMP/PGM2/DCTPP1	3	30	703	20973	30/20973
	GO:0060045	positive regulation of cardiac muscle cell proliferation	3/703	3/30	0.0780164303537775	0.382656211564573	0.344170846837911	TBX5/TGFBR3/BMPR1A	3	30	703	20973	30/20973
	GO:0016032	viral process	23/703	23/498	0.0765482295559706	0.382656211564573	0.344170846837911	TRIM38/TRIM21/NRP1/EIF3A/CTBP2/EIF3L/RESF1/CD55/ANPEP/CHMP1A/PPIA/HMGA2/BSG/XPR1/CXADR/EPHA2/ITGA2/EFNB3/TP53/CAV1/APOE/INPP5K/CLDN6	23	498	703	20973	498/20973
	GO:0006869	lipid transport	20/703	20/422	0.0769508257283372	0.382656211564573	0.344170846837911	ANXA1/ABCA1/ABCA3/PDZD8/AKR1C1/CES1/RBP1/ABCA2/PITPNC1/MIF/SIGMAR1/LIMA1/GRAMD1A/GRAMD1B/THBS1/VLDLR/CLU/CAV1/APOE/CRABP2	20	422	703	20973	422/20973
	GO:0009176	pyrimidine deoxyribonucleoside monophosphate metabolic process	2/703	2/14	0.0782434275427447	0.382656211564573	0.344170846837911	TYMP/SHMT1	2	14	703	20973	14/20973
	GO:0009950	dorsal/ventral axis specification	2/703	2/14	0.0782434275427447	0.382656211564573	0.344170846837911	BMPR1A/CTNNB1	2	14	703	20973	14/20973
	GO:0034141	positive regulation of toll-like receptor 3 signaling pathway	2/703	2/14	0.0782434275427447	0.382656211564573	0.344170846837911	CAV1/F2RL1	2	14	703	20973	14/20973
	GO:0034982	mitochondrial protein processing	2/703	2/14	0.0782434275427447	0.382656211564573	0.344170846837911	OMA1/SPG7	2	14	703	20973	14/20973
	GO:0038166	angiotensin-activated signaling pathway	2/703	2/14	0.0782434275427447	0.382656211564573	0.344170846837911	CAV1/AGTRAP	2	14	703	20973	14/20973
	GO:0061418	regulation of transcription from RNA polymerase II promoter in response to hypoxia	2/703	2/14	0.0782434275427447	0.382656211564573	0.344170846837911	HIF1AN/TP53	2	14	703	20973	14/20973
	GO:0070307	lens fiber cell development	2/703	2/14	0.0782434275427447	0.382656211564573	0.344170846837911	EPHA2/TMOD1	2	14	703	20973	14/20973
	GO:0070943	neutrophil-mediated killing of symbiont cell	2/703	2/14	0.0782434275427447	0.382656211564573	0.344170846837911	MYD88/F2RL1	2	14	703	20973	14/20973
	GO:1904152	regulation of retrograde protein transport, ER to cytosol	2/703	2/14	0.0782434275427447	0.382656211564573	0.344170846837911	YOD1/DERL2	2	14	703	20973	14/20973
	GO:2001140	positive regulation of phospholipid transport	2/703	2/14	0.0782434275427447	0.382656211564573	0.344170846837911	ABCA3/APOE	2	14	703	20973	14/20973
	GO:0051897	positive regulation of protein kinase B signaling	8/703	8/133	0.0790362228046766	0.385533137606796	0.346758428176768	F3/HCLS1/TXN/ARRB2/THBS1/MYORG/C1QBP/LIN28A	8	133	703	20973	133/20973
	GO:0050680	negative regulation of epithelial cell proliferation	10/703	10/179	0.0795221600396958	0.387525062827591	0.348550016995555	SFN/IFT74/TGFBR3/SPARC/THBS1/EPPK1/MCC/CAV1/APOE/IFT80	10	179	703	20973	179/20973
	GO:0000041	transition metal ion transport	7/703	7/111	0.07962670379877	0.387656321125591	0.348668074087566	ABCB7/SLC39A11/SLC39A14/FTH1/SLC39A1/STEAP2/TTYH1	7	111	703	20973	111/20973
	GO:0009199	ribonucleoside triphosphate metabolic process	6/703	6/90	0.0817202020748296	0.392870461370331	0.353357806043638	AK4/NUDT2/IMPDH1/NME2/MFN1/ENTPD7	6	90	703	20973	90/20973
	GO:0048864	stem cell development	6/703	6/90	0.0817202020748296	0.392870461370331	0.353357806043638	ALDH1A2/NRP1/MAPK1/BMPR1A/NOLC1/CDH2	6	90	703	20973	90/20973
	GO:1903533	regulation of protein targeting	6/703	6/90	0.0817202020748296	0.392870461370331	0.353357806043638	BAG3/UBL5/UBE2L3/SREBF1/MYO1C/INPP5K	6	90	703	20973	90/20973
	GO:0031529	ruffle organization	5/703	5/69	0.0815151639680494	0.392870461370331	0.353357806043638	PLEKHA1/AIF1L/LIMA1/CAV1/INPP5K	5	69	703	20973	69/20973
	GO:0031638	zymogen activation	5/703	5/69	0.0815151639680494	0.392870461370331	0.353357806043638	PGK1/GGT1/OMA1/THBS1/HGFAC	5	69	703	20973	69/20973
	GO:0048857	neural nucleus development	5/703	5/69	0.0815151639680494	0.392870461370331	0.353357806043638	CALM1/G6PD/GLUD1/YWHAE/INA	5	69	703	20973	69/20973
	GO:0050771	negative regulation of axonogenesis	5/703	5/69	0.0815151639680494	0.392870461370331	0.353357806043638	ARHGAP4/NRP1/THY1/LRP4/EFNB3	5	69	703	20973	69/20973
	GO:0060675	ureteric bud morphogenesis	5/703	5/69	0.0815151639680494	0.392870461370331	0.353357806043638	ILK/DCHS1/PAX2/LZTS2/CTNNB1	5	69	703	20973	69/20973
	GO:0042168	heme metabolic process	4/703	4/49	0.0812068040864059	0.392870461370331	0.353357806043638	BLVRB/ABCB7/ABCB10/COX15	4	49	703	20973	49/20973
	GO:0042304	regulation of fatty acid biosynthetic process	4/703	4/49	0.0812068040864059	0.392870461370331	0.353357806043638	ANXA1/ERLIN1/ACADVL/ACADL	4	49	703	20973	49/20973
	GO:0043616	keratinocyte proliferation	4/703	4/49	0.0812068040864059	0.392870461370331	0.353357806043638	FERMT1/SFN/SRSF6/EPPK1	4	49	703	20973	49/20973
	GO:0045862	positive regulation of proteolysis	20/703	20/425	0.0812512008901495	0.392870461370331	0.353357806043638	F3/PML/MAPT/AKIRIN2/STAT3/GCLC/ANP32B/BAG6/UACA/DIABLO/CLU/CCN1/S100A9/ATP2A3/CAV1/APOE/FAS/CLN6/CCN2/CLDN3	20	425	703	20973	425/20973
	GO:0045165	cell fate commitment	15/703	15/300	0.0813239472227957	0.392870461370331	0.353357806043638	KLF4/PDPN/PML/NRP1/FOXA1/STAT3/TBX5/TEAD3/PAX2/ROR2/KDM6B/BMPR1A/CTNNB1/TP53/IFRD1	15	300	703	20973	300/20973
	GO:0030111	regulation of Wnt signaling pathway	17/703	17/350	0.0820284320597444	0.393594637981194	0.354009149128863	FERMT1/AMER1/ILK/PTPRU/ROR2/LRP4/LZTS2/CTNND1/MCC/CTNNB1/PLPP3/CDH2/CAV1/APOE/NXN/TMEM88/IFT80	17	350	703	20973	350/20973
	GO:1901990	regulation of mitotic cell cycle phase transition	17/703	17/350	0.0820284320597444	0.393594637981194	0.354009149128863	SLFN11/ANXA1/KLF4/PML/KLHL18/FBXO5/CDCA5/HMGA2/UIMC1/BUB1B/BUB1/ECD/TP53/AURKB/CCND2/CCND1/HSPA2	17	350	703	20973	350/20973
	GO:0034763	negative regulation of transmembrane transport	9/703	9/157	0.0822806022379335	0.394047562970736	0.35441652152344	GSTM2/CALM1/SLC43A2/YWHAE/THBS1/ENPP1/CAV1/INPP5K/SLC43A1	9	157	703	20973	157/20973
	GO:0030595	leukocyte chemotaxis	14/703	14/276	0.0822656543679699	0.394047562970736	0.35441652152344	ANXA1/DDT/MAPK1/PLEC/MIF/PPIA/BSG/ITGA1/CXADR/THBS1/S100A9/RARRES2/C1QBP/F2RL1	14	276	703	20973	276/20973
	GO:0048661	positive regulation of smooth muscle cell proliferation	7/703	7/112	0.0826190985023978	0.395289652317507	0.355533688655207	MYD88/HPGD/FOXJ2/THBS1/ITGA2/BMPR1A/GJA1	7	112	703	20973	112/20973
	GO:0060537	muscle tissue development	20/703	20/426	0.0827194260932448	0.395390940991156	0.355624790295612	ALDH1A2/LMNA/PLEC/G6PD/NIBAN2/TBX5/TGFBR3/ARRB2/PKP2/MYLK/CXADR/MYL6B/KDM6B/BMPR1A/MYORG/OBSL1/CTNNB1/CSRP2/CAV1/GJA1	20	426	703	20973	426/20973
	GO:0099111	microtubule-based transport	11/703	11/204	0.0828438457228366	0.395607083542609	0.355819194470229	BAG3/MAPT/TRIM58/IFT27/HSBP1/IFT74/OFD1/KIF1C/MAP1A/SPG7/PAFAH1B1	11	204	703	20973	204/20973
	GO:0051208	sequestering of calcium ion	8/703	8/135	0.0844728641829179	0.400324436995896	0.360062103598016	ITPR2/ANK2/GSTM2/CALM1/IBTK/THY1/JPH1/RASA3	8	135	703	20973	135/20973
	GO:0072655	establishment of protein localization to mitochondrion	8/703	8/135	0.0844728641829179	0.400324436995896	0.360062103598016	BAG3/MAPT/UBL5/UBE2L3/AGK/GRPEL2/TIMM21/SREBF1	8	135	703	20973	135/20973
	GO:0032367	intracellular cholesterol transport	3/703	3/31	0.0843181414417807	0.400324436995896	0.360062103598016	ABCA1/CES1/ABCA2	3	31	703	20973	31/20973
	GO:0060325	face morphogenesis	3/703	3/31	0.0843181414417807	0.400324436995896	0.360062103598016	PLEKHA1/SGPL1/CRISPLD1	3	31	703	20973	31/20973
	GO:0071577	zinc ion transmembrane transport	3/703	3/31	0.0843181414417807	0.400324436995896	0.360062103598016	SLC39A11/SLC39A14/SLC39A1	3	31	703	20973	31/20973
	GO:2000810	regulation of bicellular tight junction assembly	3/703	3/31	0.0843181414417807	0.400324436995896	0.360062103598016	EPHA2/MYO1C/CLDN3	3	31	703	20973	31/20973
	GO:0030307	positive regulation of cell growth	10/703	10/181	0.0841540101551486	0.400324436995896	0.360062103598016	CDKL5/SFN/NRP1/MAPT/SHTN1/SUPV3L1/PAFAH1B1/S100A9/DERL2/CRABP2	10	181	703	20973	181/20973
	GO:0060402	calcium ion transport into cytosol	10/703	10/181	0.0841540101551486	0.400324436995896	0.360062103598016	ITPR2/PML/ANK2/GSTM2/CALM1/IBTK/THY1/JPH1/RASA3/CAV1	10	181	703	20973	181/20973
	GO:0007006	mitochondrial membrane organization	8/703	8/136	0.0872715646985464	0.402114985057993	0.361672568616514	GCLC/AGK/MFN1/OMA1/SPG7/TMEM11/GHITM/TP53	8	136	703	20973	136/20973
	GO:0021782	glial cell development	8/703	8/136	0.0872715646985464	0.402114985057993	0.361672568616514	MAPT/LAMB2/ABCA2/PLEC/ILK/ROR2/CLU/S100A9	8	136	703	20973	136/20973
	GO:0006626	protein targeting to mitochondrion	7/703	7/113	0.0856753855299419	0.402114985057993	0.361672568616514	BAG3/UBL5/UBE2L3/AGK/GRPEL2/TIMM21/SREBF1	7	113	703	20973	113/20973
	GO:2001237	negative regulation of extrinsic apoptotic signaling pathway	7/703	7/113	0.0856753855299419	0.402114985057993	0.361672568616514	LMNA/NRP1/GCLC/ITPRIP/COL2A1/THBS1/CTNNA1	7	113	703	20973	113/20973
	GO:0001841	neural tube formation	7/703	7/114	0.0887953610648581	0.402114985057993	0.361672568616514	SALL4/PAX2/SDC4/DVL2/KIF20B/CELSR1/SPINT2	7	114	703	20973	114/20973
	GO:0019218	regulation of steroid metabolic process	7/703	7/114	0.0887953610648581	0.402114985057993	0.361672568616514	CES1/ABCA2/ERLIN1/SREBF1/APOE/ACADVL/ACADL	7	114	703	20973	114/20973
	GO:0045814	negative regulation of gene expression, epigenetic	6/703	6/91	0.0851492528146294	0.402114985057993	0.361672568616514	RESF1/HMGA2/ZDBF2/MACROH2A2/CENPV/NDN	6	91	703	20973	91/20973
	GO:1901568	fatty acid derivative metabolic process	6/703	6/91	0.0851492528146294	0.402114985057993	0.361672568616514	FAR2/HPGD/PTGR1/GGT1/ACSL6/DGAT1	6	91	703	20973	91/20973
	GO:0043297	apical junction assembly	6/703	6/92	0.0886565576569217	0.402114985057993	0.361672568616514	CLDN11/EPHA2/CTNNA1/MYO1C/CLDN3/CLDN6	6	92	703	20973	92/20973
	GO:0045445	myoblast differentiation	6/703	6/92	0.0886565576569217	0.402114985057993	0.361672568616514	SRA1/PLEC/ID3/HIF1AN/SDC1/IFRD1	6	92	703	20973	92/20973
	GO:0030239	myofibril assembly	5/703	5/70	0.0854967582620602	0.402114985057993	0.361672568616514	PLEC/TMOD1/OBSL1/CSRP2/KRT19	5	70	703	20973	70/20973
	GO:0072171	mesonephric tubule morphogenesis	5/703	5/70	0.0854967582620602	0.402114985057993	0.361672568616514	ILK/DCHS1/PAX2/LZTS2/CTNNB1	5	70	703	20973	70/20973
	GO:0033628	regulation of cell adhesion mediated by integrin	4/703	4/50	0.086047763855774	0.402114985057993	0.361672568616514	FERMT1/IFT74/EPHA2/PODXL	4	50	703	20973	50/20973
	GO:0045747	positive regulation of Notch signaling pathway	4/703	4/50	0.086047763855774	0.402114985057993	0.361672568616514	TSPAN14/STAT3/ZMIZ1/EPN2	4	50	703	20973	50/20973
	GO:0051656	establishment of organelle localization	20/703	20/429	0.0872290086728369	0.402114985057993	0.361672568616514	WDR11/CCDC186/MAPT/TRIM58/F8A1/HSBP1/S100A13/CHMP1A/CDCA5/KIF1C/SHROOM2/TOR1A/SDC4/PAFAH1B1/CTNNB1/AURKB/SDC1/MYO1C/LLGL1/GJA1	20	429	703	20973	429/20973
	GO:0140694	non-membrane-bounded organelle assembly	20/703	20/430	0.088767298806156	0.402114985057993	0.361672568616514	BCCIP/ABRAXAS2/MAPT/MSN/TUBGCP2/RPS5/PLEC/FBXO5/CHMP1A/CNTROB/MRPL20/TMOD1/KIF11/LZTS2/OBSL1/CSRP2/AURKB/C1QBP/KIAA0753/KRT19	20	430	703	20973	430/20973
	GO:0001921	positive regulation of receptor recycling	2/703	2/15	0.0883386081057593	0.402114985057993	0.361672568616514	INPP5F/VAMP3	2	15	703	20973	15/20973
	GO:0002070	epithelial cell maturation	2/703	2/15	0.0883386081057593	0.402114985057993	0.361672568616514	FOXA1/GJA1	2	15	703	20973	15/20973
	GO:0002829	negative regulation of type 2 immune response	2/703	2/15	0.0883386081057593	0.402114985057993	0.361672568616514	ANXA1/ARG2	2	15	703	20973	15/20973
	GO:0002903	negative regulation of B cell apoptotic process	2/703	2/15	0.0883386081057593	0.402114985057993	0.361672568616514	MIF/AURKB	2	15	703	20973	15/20973
	GO:0003337	mesenchymal to epithelial transition involved in metanephros morphogenesis	2/703	2/15	0.0883386081057593	0.402114985057993	0.361672568616514	PAX2/CTNNB1	2	15	703	20973	15/20973
	GO:0009071	serine family amino acid catabolic process	2/703	2/15	0.0883386081057593	0.402114985057993	0.361672568616514	GLDC/SHMT1	2	15	703	20973	15/20973
	GO:0010872	regulation of cholesterol esterification	2/703	2/15	0.0883386081057593	0.402114985057993	0.361672568616514	ABCA2/APOE	2	15	703	20973	15/20973
	GO:0032933	SREBP signaling pathway	2/703	2/15	0.0883386081057593	0.402114985057993	0.361672568616514	ERLIN1/SREBF1	2	15	703	20973	15/20973
	GO:0035493	SNARE complex assembly	2/703	2/15	0.0883386081057593	0.402114985057993	0.361672568616514	VAMP3/STXBP6	2	15	703	20973	15/20973
	GO:0035672	oligopeptide transmembrane transport	2/703	2/15	0.0883386081057593	0.402114985057993	0.361672568616514	SLC7A11/GJA1	2	15	703	20973	15/20973
	GO:0046036	CTP metabolic process	2/703	2/15	0.0883386081057593	0.402114985057993	0.361672568616514	NME2/ENTPD7	2	15	703	20973	15/20973
	GO:0046655	folic acid metabolic process	2/703	2/15	0.0883386081057593	0.402114985057993	0.361672568616514	SLC25A32/SHMT1	2	15	703	20973	15/20973
	GO:0048820	hair follicle maturation	2/703	2/15	0.0883386081057593	0.402114985057993	0.361672568616514	FERMT1/CTNNB1	2	15	703	20973	15/20973
	GO:0051238	sequestering of metal ion	2/703	2/15	0.0883386081057593	0.402114985057993	0.361672568616514	FTH1/S100A9	2	15	703	20973	15/20973
	GO:0051284	positive regulation of sequestering of calcium ion	2/703	2/15	0.0883386081057593	0.402114985057993	0.361672568616514	GSTM2/CALM1	2	15	703	20973	15/20973
	GO:0060099	regulation of phagocytosis, engulfment	2/703	2/15	0.0883386081057593	0.402114985057993	0.361672568616514	ITGA2/F2RL1	2	15	703	20973	15/20973
	GO:0070831	basement membrane assembly	2/703	2/15	0.0883386081057593	0.402114985057993	0.361672568616514	LAMB2/PHLDB1	2	15	703	20973	15/20973
	GO:0071514	genomic imprinting	2/703	2/15	0.0883386081057593	0.402114985057993	0.361672568616514	ZDBF2/NDN	2	15	703	20973	15/20973
	GO:0072498	embryonic skeletal joint development	2/703	2/15	0.0883386081057593	0.402114985057993	0.361672568616514	COL2A1/CTNNB1	2	15	703	20973	15/20973
	GO:0072578	neurotransmitter-gated ion channel clustering	2/703	2/15	0.0883386081057593	0.402114985057993	0.361672568616514	SLC7A11/APOE	2	15	703	20973	15/20973
	GO:0098789	pre-mRNA cleavage required for polyadenylation	2/703	2/15	0.0883386081057593	0.402114985057993	0.361672568616514	TUT1/FIP1L1	2	15	703	20973	15/20973
	GO:1903044	protein localization to membrane raft	2/703	2/15	0.0883386081057593	0.402114985057993	0.361672568616514	RFTN1/CAV1	2	15	703	20973	15/20973
	GO:1903543	positive regulation of exosomal secretion	2/703	2/15	0.0883386081057593	0.402114985057993	0.361672568616514	SDC4/SDC1	2	15	703	20973	15/20973
	GO:1905153	regulation of membrane invagination	2/703	2/15	0.0883386081057593	0.402114985057993	0.361672568616514	ITGA2/F2RL1	2	15	703	20973	15/20973
	GO:2000104	negative regulation of DNA-templated DNA replication	2/703	2/15	0.0883386081057593	0.402114985057993	0.361672568616514	SLFN11/FBXO5	2	15	703	20973	15/20973
	GO:2001138	regulation of phospholipid transport	2/703	2/15	0.0883386081057593	0.402114985057993	0.361672568616514	ABCA3/APOE	2	15	703	20973	15/20973
	GO:0045765	regulation of angiogenesis	18/703	18/377	0.085143685018389	0.402114985057993	0.361672568616514	ANXA3/KLF4/F3/PGK1/PML/NRP1/AMOT/STAT3/NIBAN2/FOXJ2/HMGA2/CEMIP2/EPHA2/SPARC/THBS1/DDAH1/CTNNB1/EPN2	18	377	703	20973	377/20973
	GO:0032956	regulation of actin cytoskeleton organization	18/703	18/379	0.0883988548343005	0.402114985057993	0.361672568616514	NRP1/ARHGDIA/ARHGAP18/HCLS1/CGNL1/ADD3/RHOBTB3/BAIAP2L1/TMOD1/LIMA1/SDC4/SPTBN2/LIMCH1/INPP5K/CCN2/F2RL1/CELSR1/ARPIN	18	379	703	20973	379/20973
	GO:0097193	intrinsic apoptotic signaling pathway	16/703	16/328	0.0870013130613461	0.402114985057993	0.361672568616514	MAEL/SFN/PML/CD44/MIF/BAG6/PPIA/EPHA2/DIABLO/CLU/S100A9/ATP2A3/TP53/MYBBP1A/CAV1/ZNF385A	16	328	703	20973	328/20973
	GO:0045927	positive regulation of growth	14/703	14/279	0.0879311460646613	0.402114985057993	0.361672568616514	CDKL5/SFN/NRP1/MAPT/SHTN1/TBX5/TGFBR3/SUPV3L1/RFTN1/BMPR1A/PAFAH1B1/S100A9/DERL2/CRABP2	14	279	703	20973	279/20973
	GO:1903522	regulation of blood circulation	14/703	14/279	0.0879311460646613	0.402114985057993	0.361672568616514	GLRX3/ANK2/GSTM2/CALM1/TBX5/PKP2/CXADR/YWHAE/SREBF1/DSC2/ATP2A3/CAV1/CCN2/GJA1	14	279	703	20973	279/20973
	GO:0060560	developmental growth involved in morphogenesis	13/703	13/254	0.0868662708299259	0.402114985057993	0.361672568616514	CDKL5/ARHGAP4/NRP1/PAK6/MAPT/LAMB2/SHTN1/LZTS2/PAFAH1B1/CTNNB1/APOE/CRABP2/NDN	13	254	703	20973	254/20973
	GO:0031497	chromatin assembly	12/703	12/230	0.0873333722414956	0.402114985057993	0.361672568616514	TSPYL4/RESF1/ANP32B/H3C14/HMGA2/ZDBF2/TP53/MACROH2A2/CENPV/H1-6/NDN/H1-1	12	230	703	20973	230/20973
	GO:0043954	cellular component maintenance	5/703	5/71	0.0895786487038659	0.404927918801638	0.36420259363477	CTBP2/ITPKA/APOE/F2RL1/CLDN3	5	71	703	20973	71/20973
	GO:0071709	membrane assembly	5/703	5/71	0.0895786487038659	0.404927918801638	0.36420259363477	CHMP1A/RFTN1/LRP4/CDH2/CAV1	5	71	703	20973	71/20973
	GO:0001952	regulation of cell-matrix adhesion	8/703	8/137	0.0901237190568181	0.405807058999947	0.364993314959543	FERMT1/NRP1/LIMS1/THY1/SDC4/THBS1/MINK1/LIMCH1	8	137	703	20973	137/20973
	GO:0006720	isoprenoid metabolic process	8/703	8/137	0.0901237190568181	0.405807058999947	0.364993314959543	ALDH1A2/AKR1C1/RBP1/PMVK/ALDH3A2/RARRES2/DGAT1/CRABP2	8	137	703	20973	137/20973
	GO:0051101	regulation of DNA binding	8/703	8/137	0.0901237190568181	0.405807058999947	0.364993314959543	KLF4/CALM1/ILRUN/TXN/NIBAN2/HMGA2/ITGA2/CTNNB1	8	137	703	20973	137/20973
	GO:0006221	pyrimidine nucleotide biosynthetic process	3/703	3/32	0.0908292876800682	0.405807058999947	0.364993314959543	UMPS/NME2/SHMT1	3	32	703	20973	32/20973
	GO:0006783	heme biosynthetic process	3/703	3/32	0.0908292876800682	0.405807058999947	0.364993314959543	ABCB7/ABCB10/COX15	3	32	703	20973	32/20973
	GO:0034138	toll-like receptor 3 signaling pathway	3/703	3/32	0.0908292876800682	0.405807058999947	0.364993314959543	RFTN1/CAV1/F2RL1	3	32	703	20973	32/20973
	GO:0034311	diol metabolic process	3/703	3/32	0.0908292876800682	0.405807058999947	0.364993314959543	ABCA2/PLPP3/PCBD1	3	32	703	20973	32/20973
	GO:0039531	regulation of viral-induced cytoplasmic pattern recognition receptor signaling pathway	3/703	3/32	0.0908292876800682	0.405807058999947	0.364993314959543	TSPAN6/UFD1/C1QBP	3	32	703	20973	32/20973
	GO:0045684	positive regulation of epidermis development	3/703	3/32	0.0908292876800682	0.405807058999947	0.364993314959543	SFN/NME2/MACROH2A2	3	32	703	20973	32/20973
	GO:0050927	positive regulation of positive chemotaxis	3/703	3/32	0.0908292876800682	0.405807058999947	0.364993314959543	F3/ITGA2/F2RL1	3	32	703	20973	32/20973
	GO:0060914	heart formation	3/703	3/32	0.0908292876800682	0.405807058999947	0.364993314959543	TBX5/BMPR1A/CTNNB1	3	32	703	20973	32/20973
	GO:1901863	positive regulation of muscle tissue development	3/703	3/32	0.0908292876800682	0.405807058999947	0.364993314959543	NIBAN2/CTNNB1/GJA1	3	32	703	20973	32/20973
	GO:1902751	positive regulation of cell cycle G2/M phase transition	3/703	3/32	0.0908292876800682	0.405807058999947	0.364993314959543	FBXO5/CCND1/HSPA2	3	32	703	20973	32/20973
	GO:0022900	electron transport chain	10/703	10/184	0.0914039914465898	0.407645479710461	0.366646837870343	GLDC/PLEC/SLC25A22/COA6/P4HA2/GHITM/MYBBP1A/COX15/DHRS2/ALDH2	10	184	703	20973	184/20973
	GO:0046890	regulation of lipid biosynthetic process	10/703	10/184	0.0914039914465898	0.407645479710461	0.366646837870343	ANXA1/ABCA3/CES1/ABCA2/ERLIN1/SREBF1/CCN1/APOE/ACADVL/ACADL	10	184	703	20973	184/20973
	GO:0033138	positive regulation of peptidyl-serine phosphorylation	7/703	7/115	0.091978781137994	0.409843007836111	0.368623351234291	CD44/HCLS1/TXN/MIF/ARRB2/TNKS1BP1/CAV1	7	115	703	20973	115/20973
	GO:0036293	response to decreased oxygen levels	16/703	16/331	0.0923748530929332	0.41124099037362	0.369880732714738	AK4/LMNA/PGK1/ITPR2/PML/TGFBR3/HIF1AN/THBS1/ITGA2/DDAH1/ALKBH5/TP53/CAV1/AGTRAP/CCN2/CLDN3	16	331	703	20973	331/20973
	GO:0007584	response to nutrient	9/703	9/161	0.0926675356726063	0.411809911641164	0.370392435147672	NQO1/MGMT/ALDH1A2/ASS1/BCHE/GCLC/ALPL/ITGA2/CCND1	9	161	703	20973	161/20973
	GO:0035303	regulation of dephosphorylation	9/703	9/161	0.0926675356726063	0.411809911641164	0.370392435147672	IGBP1/CALM1/PPP6R2/PPIA/ITGA1/YWHAE/ITGA2/SMG6/INPP5K	9	161	703	20973	161/20973
	GO:0014074	response to purine-containing compound	8/703	8/138	0.093029192574326	0.413049615030007	0.37150745628746	ASS1/ITPR2/CPS1/GSTM2/BSG/SREBF1/SDC1/INPP5K	8	138	703	20973	138/20973
	GO:0006261	DNA-templated DNA replication	9/703	9/162	0.0953790677415354	0.415380046791778	0.373603506602878	SLFN11/MCMBP/FBXO5/WDR18/MGME1/EXD2/HMGA1/NOC3L/TWNK	9	162	703	20973	162/20973
	GO:0044272	sulfur compound biosynthetic process	9/703	9/163	0.098136337804809	0.415380046791778	0.373603506602878	MRI1/GCLC/B3GALT6/GGT1/MLYCD/B4GALT4/ACSL6/B4GAT1/SLC7A11	9	163	703	20973	163/20973
	GO:0001838	embryonic epithelial tube formation	8/703	8/139	0.0959878226894181	0.415380046791778	0.373603506602878	SALL4/PAX2/SDC4/DVL2/KIF20B/CTNNB1/CELSR1/SPINT2	8	139	703	20973	139/20973
	GO:0009408	response to heat	8/703	8/139	0.0959878226894181	0.415380046791778	0.373603506602878	BAG3/MAPT/HSBP1/GCLC/YWHAE/THBS1/MICB/HSPA2	8	139	703	20973	139/20973
	GO:0043244	regulation of protein-containing complex disassembly	8/703	8/139	0.0959878226894181	0.415380046791778	0.373603506602878	ADD3/TMOD1/LIMA1/MID1/MAP1A/SPTBN2/SMCR8/F2RL1	8	139	703	20973	139/20973
	GO:0002027	regulation of heart rate	7/703	7/116	0.095225362118594	0.415380046791778	0.373603506602878	ANK2/CALM1/PKP2/YWHAE/SREBF1/DSC2/CAV1	7	116	703	20973	116/20973
	GO:0030038	contractile actin filament bundle assembly	7/703	7/117	0.098534781245979	0.415380046791778	0.373603506602878	NRP1/ARRB1/CGNL1/SDC4/LIMCH1/INPP5K/CCN2	7	117	703	20973	117/20973
	GO:0043149	stress fiber assembly	7/703	7/117	0.098534781245979	0.415380046791778	0.373603506602878	NRP1/ARRB1/CGNL1/SDC4/LIMCH1/INPP5K/CCN2	7	117	703	20973	117/20973
	GO:0090174	organelle membrane fusion	7/703	7/117	0.098534781245979	0.415380046791778	0.373603506602878	ANXA1/VTI1A/VAMP3/MFN1/STX8/STXBP6/ANKFY1	7	117	703	20973	117/20973
	GO:0061035	regulation of cartilage development	5/703	5/73	0.098039027208414	0.415380046791778	0.373603506602878	ZNF219/CCN1/CTNNB1/CCN2/RFLNB	5	73	703	20973	73/20973
	GO:0032873	negative regulation of stress-activated MAPK cascade	4/703	4/52	0.0961379903655331	0.415380046791778	0.373603506602878	IGBP1/PPIA/PAFAH1B1/F2RL1	4	52	703	20973	52/20973
	GO:0042119	neutrophil activation	4/703	4/52	0.0961379903655331	0.415380046791778	0.373603506602878	MYD88/ANXA3/ANXA1/F2RL1	4	52	703	20973	52/20973
	GO:0045912	negative regulation of carbohydrate metabolic process	4/703	4/52	0.0961379903655331	0.415380046791778	0.373603506602878	STAT3/ENPP1/TP53/INPP5K	4	52	703	20973	52/20973
	GO:0046839	phospholipid dephosphorylation	4/703	4/52	0.0961379903655331	0.415380046791778	0.373603506602878	INPP5F/INPP5A/PLPP3/INPP5K	4	52	703	20973	52/20973
	GO:0070303	negative regulation of stress-activated protein kinase signaling cascade	4/703	4/52	0.0961379903655331	0.415380046791778	0.373603506602878	IGBP1/PPIA/PAFAH1B1/F2RL1	4	52	703	20973	52/20973
	GO:0071622	regulation of granulocyte chemotaxis	4/703	4/52	0.0961379903655331	0.415380046791778	0.373603506602878	MAPK1/THBS1/RARRES2/C1QBP	4	52	703	20973	52/20973
	GO:1903214	regulation of protein targeting to mitochondrion	4/703	4/52	0.0961379903655331	0.415380046791778	0.373603506602878	BAG3/UBL5/UBE2L3/SREBF1	4	52	703	20973	52/20973
	GO:0007263	nitric oxide mediated signal transduction	3/703	3/33	0.0975423506542873	0.415380046791778	0.373603506602878	THBS1/DDAH1/APOE	3	33	703	20973	33/20973
	GO:0009648	photoperiodism	3/703	3/33	0.0975423506542873	0.415380046791778	0.373603506602878	PML/MTA1/TP53	3	33	703	20973	33/20973
	GO:0010880	regulation of release of sequestered calcium ion into cytosol by sarcoplasmic reticulum	3/703	3/33	0.0975423506542873	0.415380046791778	0.373603506602878	ANK2/GSTM2/CALM1	3	33	703	20973	33/20973
	GO:0014044	Schwann cell development	3/703	3/33	0.0975423506542873	0.415380046791778	0.373603506602878	LAMB2/PLEC/ILK	3	33	703	20973	33/20973
	GO:0033137	negative regulation of peptidyl-serine phosphorylation	3/703	3/33	0.0975423506542873	0.415380046791778	0.373603506602878	INPP5F/CAV1/INPP5K	3	33	703	20973	33/20973
	GO:0050926	regulation of positive chemotaxis	3/703	3/33	0.0975423506542873	0.415380046791778	0.373603506602878	F3/ITGA2/F2RL1	3	33	703	20973	33/20973
	GO:0051443	positive regulation of ubiquitin-protein transferase activity	3/703	3/33	0.0975423506542873	0.415380046791778	0.373603506602878	UBE2S/MAGEA2/UBE2L3	3	33	703	20973	33/20973
	GO:0070977	bone maturation	3/703	3/33	0.0975423506542873	0.415380046791778	0.373603506602878	DCHS1/RFLNB/IFT80	3	33	703	20973	33/20973
	GO:0071353	cellular response to interleukin-4	3/703	3/33	0.0975423506542873	0.415380046791778	0.373603506602878	PARP14/PML/SHPK	3	33	703	20973	33/20973
	GO:0140058	neuron projection arborization	3/703	3/33	0.0975423506542873	0.415380046791778	0.373603506602878	NRP1/PAK6/DVL2	3	33	703	20973	33/20973
	GO:0040013	negative regulation of locomotion	20/703	20/434	0.0950967943954467	0.415380046791778	0.373603506602878	KLF4/ARHGAP4/DDT/NRP1/STAT3/MIF/TBX5/PTPRU/THY1/THBS1/BMPR1A/CTNNA1/EPPK1/MCC/LIMCH1/APOE/GJA1/CLDN3/SPINT2/ARPIN	20	434	703	20973	434/20973
	GO:0001780	neutrophil homeostasis	2/703	2/16	0.0987930922099364	0.415380046791778	0.373603506602878	ANXA1/SLC7A11	2	16	703	20973	16/20973
	GO:0006264	mitochondrial DNA replication	2/703	2/16	0.0987930922099364	0.415380046791778	0.373603506602878	MGME1/TWNK	2	16	703	20973	16/20973
	GO:0010839	negative regulation of keratinocyte proliferation	2/703	2/16	0.0987930922099364	0.415380046791778	0.373603506602878	SFN/EPPK1	2	16	703	20973	16/20973
	GO:0017014	protein nitrosylation	2/703	2/16	0.0987930922099364	0.415380046791778	0.373603506602878	TXN/S100A9	2	16	703	20973	16/20973
	GO:0018119	peptidyl-cysteine S-nitrosylation	2/703	2/16	0.0987930922099364	0.415380046791778	0.373603506602878	TXN/S100A9	2	16	703	20973	16/20973
	GO:0030033	microvillus assembly	2/703	2/16	0.0987930922099364	0.415380046791778	0.373603506602878	TNIK/PODXL	2	16	703	20973	16/20973
	GO:0032274	gonadotropin secretion	2/703	2/16	0.0987930922099364	0.415380046791778	0.373603506602878	NIBAN2/GJA1	2	16	703	20973	16/20973
	GO:0034139	regulation of toll-like receptor 3 signaling pathway	2/703	2/16	0.0987930922099364	0.415380046791778	0.373603506602878	CAV1/F2RL1	2	16	703	20973	16/20973
	GO:0035435	phosphate ion transmembrane transport	2/703	2/16	0.0987930922099364	0.415380046791778	0.373603506602878	XPR1/SLC25A11	2	16	703	20973	16/20973
	GO:0035630	bone mineralization involved in bone maturation	2/703	2/16	0.0987930922099364	0.415380046791778	0.373603506602878	RFLNB/IFT80	2	16	703	20973	16/20973
	GO:0035739	CD4-positive, alpha-beta T cell proliferation	2/703	2/16	0.0987930922099364	0.415380046791778	0.373603506602878	CD55/ARG2	2	16	703	20973	16/20973
	GO:0043518	negative regulation of DNA damage response, signal transduction by p53 class mediator	2/703	2/16	0.0987930922099364	0.415380046791778	0.373603506602878	CD44/MIF	2	16	703	20973	16/20973
	GO:0045176	apical protein localization	2/703	2/16	0.0987930922099364	0.415380046791778	0.373603506602878	SHROOM2/CELSR1	2	16	703	20973	16/20973
	GO:0046598	positive regulation of viral entry into host cell	2/703	2/16	0.0987930922099364	0.415380046791778	0.373603506602878	TRIM38/TRIM21	2	16	703	20973	16/20973
	GO:0051299	centrosome separation	2/703	2/16	0.0987930922099364	0.415380046791778	0.373603506602878	CNTROB/KIF11	2	16	703	20973	16/20973
	GO:0051791	medium-chain fatty acid metabolic process	2/703	2/16	0.0987930922099364	0.415380046791778	0.373603506602878	CES1/CRAT	2	16	703	20973	16/20973
	GO:0060413	atrial septum morphogenesis	2/703	2/16	0.0987930922099364	0.415380046791778	0.373603506602878	TBX5/CCN1	2	16	703	20973	16/20973
	GO:0061684	chaperone-mediated autophagy	2/703	2/16	0.0987930922099364	0.415380046791778	0.373603506602878	BAG3/CLU	2	16	703	20973	16/20973
	GO:0070571	negative regulation of neuron projection regeneration	2/703	2/16	0.0987930922099364	0.415380046791778	0.373603506602878	INPP5F/THY1	2	16	703	20973	16/20973
	GO:0070942	neutrophil mediated cytotoxicity	2/703	2/16	0.0987930922099364	0.415380046791778	0.373603506602878	MYD88/F2RL1	2	16	703	20973	16/20973
	GO:0071501	cellular response to sterol depletion	2/703	2/16	0.0987930922099364	0.415380046791778	0.373603506602878	ERLIN1/SREBF1	2	16	703	20973	16/20973
	GO:0075294	positive regulation by symbiont of entry into host	2/703	2/16	0.0987930922099364	0.415380046791778	0.373603506602878	TRIM38/TRIM21	2	16	703	20973	16/20973
	GO:0097091	synaptic vesicle clustering	2/703	2/16	0.0987930922099364	0.415380046791778	0.373603506602878	CTNNB1/CDH2	2	16	703	20973	16/20973
	GO:0098787	mRNA cleavage involved in mRNA processing	2/703	2/16	0.0987930922099364	0.415380046791778	0.373603506602878	TUT1/FIP1L1	2	16	703	20973	16/20973
	GO:1901163	regulation of trophoblast cell migration	2/703	2/16	0.0987930922099364	0.415380046791778	0.373603506602878	C1QBP/GJA1	2	16	703	20973	16/20973
	GO:1901836	regulation of transcription of nucleolar large rRNA by RNA polymerase I	2/703	2/16	0.0987930922099364	0.415380046791778	0.373603506602878	MACROH2A2/NCL	2	16	703	20973	16/20973
	GO:1902931	negative regulation of alcohol biosynthetic process	2/703	2/16	0.0987930922099364	0.415380046791778	0.373603506602878	ERLIN1/APOE	2	16	703	20973	16/20973
	GO:1905522	negative regulation of macrophage migration	2/703	2/16	0.0987930922099364	0.415380046791778	0.373603506602878	DDT/MIF	2	16	703	20973	16/20973
	GO:2000561	regulation of CD4-positive, alpha-beta T cell proliferation	2/703	2/16	0.0987930922099364	0.415380046791778	0.373603506602878	CD55/ARG2	2	16	703	20973	16/20973
	GO:2001224	positive regulation of neuron migration	2/703	2/16	0.0987930922099364	0.415380046791778	0.373603506602878	SHTN1/KIF20B	2	16	703	20973	16/20973
	GO:1901342	regulation of vasculature development	18/703	18/383	0.0951479152387211	0.415380046791778	0.373603506602878	ANXA3/KLF4/F3/PGK1/PML/NRP1/AMOT/STAT3/NIBAN2/FOXJ2/HMGA2/CEMIP2/EPHA2/SPARC/THBS1/DDAH1/CTNNB1/EPN2	18	383	703	20973	383/20973
	GO:0032984	protein-containing complex disassembly	13/703	13/259	0.0972791836908986	0.415380046791778	0.373603506602878	SH3GL3/CALM1/DNAJC6/CHMP1A/ADD3/TMOD1/LIMA1/MID1/MAP1A/SPTBN2/HMGA1/SMCR8/F2RL1	13	259	703	20973	259/20973
	GO:0032388	positive regulation of intracellular transport	11/703	11/210	0.0965923330089647	0.415380046791778	0.373603506602878	SFN/BAG3/MSN/UBL5/HCLS1/ANP32B/UBE2L3/KIF20B/YWHAE/AKAP5/MYO1C	11	210	703	20973	210/20973
	GO:0007259	receptor signaling pathway via JAK-STAT	10/703	10/186	0.0964385590905554	0.415380046791778	0.373603506602878	PARP14/INPP5F/STAT3/HCLS1/OCIAD2/STAT2/STAMBP/OCIAD1/CRLF1/CAV1	10	186	703	20973	186/20973
	GO:0072331	signal transduction by p53 class mediator	10/703	10/186	0.0964385590905554	0.415380046791778	0.373603506602878	RPL37/PML/CD44/MAGEA2/MIF/BAG6/TP53/MYBBP1A/AURKB/ZNF385A	10	186	703	20973	186/20973
	GO:0009266	response to temperature stimulus	11/703	11/211	0.099008929640159	0.415937429396631	0.374104830865565	BAG3/MAPT/HSBP1/GCLC/ARRB2/YWHAE/THBS1/MICB/ACADVL/UCP1/HSPA2	11	211	703	20973	211/20973
	GO:0014706	striated muscle tissue development	13/703	13/260	0.0994494731617831	0.417437074321938	0.375453650114542	ALDH1A2/LMNA/PLEC/G6PD/TBX5/TGFBR3/ARRB2/PKP2/CXADR/KDM6B/BMPR1A/OBSL1/GJA1	13	260	703	20973	260/20973
	GO:0097581	lamellipodium organization	6/703	6/95	0.0996428452640296	0.417546990011601	0.375552511115223	PDPN/CD44/VAV2/ABLIM1/EPHA2/ARPIN	6	95	703	20973	95/20973
	GO:0120193	tight junction organization	6/703	6/95	0.0996428452640296	0.417546990011601	0.375552511115223	CLDN11/PLEC/EPHA2/MYO1C/CLDN3/CLDN6	6	95	703	20973	95/20973
	GO:0006302	double-strand break repair	14/703	14/285	0.0999838949651272	0.418624941618449	0.376522048538547	MGMT/PML/HMCES/MTA1/CDCA5/HMGA2/UIMC1/WRAP53/EXD2/RMI1/SLF2/TOP3A/TNKS1BP1/TP53	14	285	703	20973	285/20973
	GO:0048593	camera-type eye morphogenesis	8/703	8/141	0.102063764500002	0.424534133551322	0.38183692787462	PAX2/EPHA2/THY1/SHROOM2/NECTIN3/PROM1/OBSL1/CTNNB1	8	141	703	20973	141/20973
	GO:0050714	positive regulation of protein secretion	8/703	8/141	0.102063764500002	0.424534133551322	0.38183692787462	PFKFB2/PFKM/PPIA/GLUD1/MYRIP/EXPH5/MYH10/F2RL1	8	141	703	20973	141/20973
	GO:0070585	protein localization to mitochondrion	8/703	8/141	0.102063764500002	0.424534133551322	0.38183692787462	BAG3/MAPT/UBL5/UBE2L3/AGK/GRPEL2/TIMM21/SREBF1	8	141	703	20973	141/20973
	GO:0006721	terpenoid metabolic process	7/703	7/118	0.101906677200109	0.424534133551322	0.38183692787462	ALDH1A2/AKR1C1/RBP1/ALDH3A2/RARRES2/DGAT1/CRABP2	7	118	703	20973	118/20973
	GO:0001736	establishment of planar polarity	5/703	5/74	0.102415141327196	0.424534133551322	0.38183692787462	ROR2/DVL2/DAAM1/PAFAH1B1/CELSR1	5	74	703	20973	74/20973
	GO:0006687	glycosphingolipid metabolic process	5/703	5/74	0.102415141327196	0.424534133551322	0.38183692787462	UGT8/ABCA2/B4GALT4/CERK/CLN6	5	74	703	20973	74/20973
	GO:0007164	establishment of tissue polarity	5/703	5/74	0.102415141327196	0.424534133551322	0.38183692787462	ROR2/DVL2/DAAM1/PAFAH1B1/CELSR1	5	74	703	20973	74/20973
	GO:0030330	DNA damage response, signal transduction by p53 class mediator	5/703	5/74	0.102415141327196	0.424534133551322	0.38183692787462	PML/CD44/MIF/TP53/ZNF385A	5	74	703	20973	74/20973
	GO:0035567	non-canonical Wnt signaling pathway	5/703	5/74	0.102415141327196	0.424534133551322	0.38183692787462	ROR2/DVL2/DAAM1/CELSR1/IFT80	5	74	703	20973	74/20973
	GO:0070588	calcium ion transmembrane transport	16/703	16/336	0.101788280500441	0.424534133551322	0.38183692787462	ITPR2/ANK2/CRACR2A/GSTM2/CALM1/G6PD/PSEN2/IBTK/MICU1/MICU2/THY1/JPH1/YWHAE/RASA3/ATP2A3/HSPA2	16	336	703	20973	336/20973
	GO:0071375	cellular response to peptide hormone stimulus	15/703	15/311	0.102103395653489	0.424534133551322	0.38183692787462	ASS1/CPS1/STAT3/APRT/GCLC/CSK/SLC39A14/BAIAP2L1/SREBF1/ENPP1/CAV1/RARRES2/MYO1C/INPP5K/AGTRAP	15	311	703	20973	311/20973
	GO:0034250	positive regulation of cellular amide metabolic process	10/703	10/188	0.101633617288981	0.424534133551322	0.38183692787462	ABCA2/EIF3E/THBS1/ITGA2/CLU/GUF1/CCN1/FXR2/C1QBP/LIN28A	10	188	703	20973	188/20973
	GO:0043087	regulation of GTPase activity	19/703	19/413	0.102934748725008	0.426334220465518	0.383455972382242	CDKL5/DOCK11/RGS10/VAV2/AMOT/LIMS1/TBC1D17/ARRB2/EPHA2/THY1/DVL2/RASA3/ABR/NEDD9/PAFAH1B1/SMCR8/SIPA1L2/RAP1GAP2/F2RL1	19	413	703	20973	413/20973
	GO:0016331	morphogenesis of embryonic epithelium	9/703	9/165	0.103787566041705	0.42729392646017	0.384319156658133	ALDH1A2/SALL4/PAX2/SDC4/DVL2/KIF20B/CTNNB1/CELSR1/SPINT2	9	165	703	20973	165/20973
	GO:0010232	vascular transport	6/703	6/96	0.103457724333294	0.42729392646017	0.384319156658133	SLC38A5/SLC7A3/ABCA2/SLC22A5/ATP2A3/APOE	6	96	703	20973	96/20973
	GO:0099175	regulation of postsynapse organization	6/703	6/96	0.103457724333294	0.42729392646017	0.384319156658133	CDKL5/SRCIN1/ITPKA/PAFAH1B1/CDH2/APOE	6	96	703	20973	96/20973
	GO:0150104	transport across blood-brain barrier	6/703	6/96	0.103457724333294	0.42729392646017	0.384319156658133	SLC38A5/SLC7A3/ABCA2/SLC22A5/ATP2A3/APOE	6	96	703	20973	96/20973
	GO:0009649	entrainment of circadian clock	3/703	3/34	0.104449626468042	0.42729392646017	0.384319156658133	PML/MTA1/TP53	3	34	703	20973	34/20973
	GO:0021801	cerebral cortex radial glia-guided migration	3/703	3/34	0.104449626468042	0.42729392646017	0.384319156658133	ZMIZ1/PAFAH1B1/CTNNB1	3	34	703	20973	34/20973
	GO:0022030	telencephalon glial cell migration	3/703	3/34	0.104449626468042	0.42729392646017	0.384319156658133	ZMIZ1/PAFAH1B1/CTNNB1	3	34	703	20973	34/20973
	GO:0030511	positive regulation of transforming growth factor beta receptor signaling pathway	3/703	3/34	0.104449626468042	0.42729392646017	0.384319156658133	FERMT1/TGFBR3/THBS1	3	34	703	20973	34/20973
	GO:0034377	plasma lipoprotein particle assembly	3/703	3/34	0.104449626468042	0.42729392646017	0.384319156658133	ABCA1/APOE/DGAT1	3	34	703	20973	34/20973
	GO:0042573	retinoic acid metabolic process	3/703	3/34	0.104449626468042	0.42729392646017	0.384319156658133	ALDH1A2/RBP1/CRABP2	3	34	703	20973	34/20973
	GO:0070570	regulation of neuron projection regeneration	3/703	3/34	0.104449626468042	0.42729392646017	0.384319156658133	KLF4/INPP5F/THY1	3	34	703	20973	34/20973
	GO:1902692	regulation of neuroblast proliferation	3/703	3/34	0.104449626468042	0.42729392646017	0.384319156658133	CTNNA1/CTNNB1/TP53	3	34	703	20973	34/20973
	GO:1903846	positive regulation of cellular response to transforming growth factor beta stimulus	3/703	3/34	0.104449626468042	0.42729392646017	0.384319156658133	FERMT1/TGFBR3/THBS1	3	34	703	20973	34/20973
	GO:1904031	positive regulation of cyclin-dependent protein kinase activity	3/703	3/34	0.104449626468042	0.42729392646017	0.384319156658133	CKS1B/CCND2/CCND1	3	34	703	20973	34/20973
	GO:0009306	protein secretion	18/703	18/388	0.104033753235902	0.42729392646017	0.384319156658133	ANXA1/ABCA1/PFKFB2/CCDC186/SERGEF/PFKM/PPIA/CAMK2G/GLUD1/MYRIP/SRCIN1/SREBF1/PAFAH1B1/EXPH5/APOE/MYH10/LLGL1/F2RL1	18	388	703	20973	388/20973
	GO:0045787	positive regulation of cell cycle	17/703	17/363	0.104973869059013	0.429087132528452	0.385932012355816	ANXA1/MAGEA4/TRIM21/FOXA1/KLHL18/FBXO5/CKS1B/CDCA5/SLF2/KIF20B/PAFAH1B1/AURKB/CENPV/CCN2/CCND2/CCND1/HSPA2	17	363	703	20973	363/20973
	GO:0007088	regulation of mitotic nuclear division	7/703	7/119	0.105340650709218	0.429882802526588	0.386647658433903	FBXO5/BUB1B/TOM1L2/KIF20B/BUB1/OBSL1/AURKB	7	119	703	20973	119/20973
	GO:0030148	sphingolipid biosynthetic process	7/703	7/119	0.105340650709218	0.429882802526588	0.386647658433903	UGT8/ABCA2/AGK/B4GALT4/SGPL1/CCN1/PLPP3	7	119	703	20973	119/20973
	GO:0035592	establishment of protein localization to extracellular region	18/703	18/389	0.105870980134673	0.431694323079749	0.388276986650728	ANXA1/ABCA1/PFKFB2/CCDC186/SERGEF/PFKM/PPIA/CAMK2G/GLUD1/MYRIP/SRCIN1/SREBF1/PAFAH1B1/EXPH5/APOE/MYH10/LLGL1/F2RL1	18	389	703	20973	389/20973
	GO:0033673	negative regulation of kinase activity	13/703	13/263	0.106135548363038	0.432420117514987	0.388929784848841	SFN/MAPT/PRDX3/PLEC/CSK/PPIA/IBTK/THY1/SRCIN1/SMCR8/CAV1/APOE/INPP5K	13	263	703	20973	263/20973
	GO:0044091	membrane biogenesis	5/703	5/75	0.10688681066011	0.432657714138774	0.389143485368376	CHMP1A/RFTN1/LRP4/CDH2/CAV1	5	75	703	20973	75/20973
	GO:1901880	negative regulation of protein depolymerization	5/703	5/75	0.10688681066011	0.432657714138774	0.389143485368376	ADD3/TMOD1/LIMA1/MID1/SPTBN2	5	75	703	20973	75/20973
	GO:0010524	positive regulation of calcium ion transport into cytosol	4/703	4/54	0.106755004426209	0.432657714138774	0.389143485368376	GSTM2/CALM1/THY1/CAV1	4	54	703	20973	54/20973
	GO:0032330	regulation of chondrocyte differentiation	4/703	4/54	0.106755004426209	0.432657714138774	0.389143485368376	ZNF219/CTNNB1/CCN2/RFLNB	4	54	703	20973	54/20973
	GO:0086009	membrane repolarization	4/703	4/54	0.106755004426209	0.432657714138774	0.389143485368376	ANK2/YWHAE/CAV1/GJA1	4	54	703	20973	54/20973
	GO:0089718	amino acid import across plasma membrane	4/703	4/54	0.106755004426209	0.432657714138774	0.389143485368376	SLC7A3/SLC43A2/SLC7A11/SLC43A1	4	54	703	20973	54/20973
	GO:1904707	positive regulation of vascular associated smooth muscle cell proliferation	4/703	4/54	0.106755004426209	0.432657714138774	0.389143485368376	HPGD/FOXJ2/BMPR1A/GJA1	4	54	703	20973	54/20973
	GO:2000378	negative regulation of reactive oxygen species metabolic process	4/703	4/54	0.106755004426209	0.432657714138774	0.389143485368376	ABCB7/G6PD/PAX2/TP53	4	54	703	20973	54/20973
	GO:0046916	cellular transition metal ion homeostasis	7/703	7/120	0.108836265192719	0.433630057447126	0.390018035969514	MT2A/GLRX3/ABCB7/SLC39A14/FTH1/STEAP2/S100A9	7	120	703	20973	120/20973
	GO:0014033	neural crest cell differentiation	6/703	6/97	0.10734785050048	0.433630057447126	0.390018035969514	ALDH1A2/NRP1/MAPK1/BMPR1A/NOLC1/CDH2	6	97	703	20973	97/20973
	GO:0048708	astrocyte differentiation	6/703	6/97	0.10734785050048	0.433630057447126	0.390018035969514	MAPT/LAMB2/STAT3/MAPK1/ROR2/S100A9	6	97	703	20973	97/20973
	GO:0000478	endonucleolytic cleavage involved in rRNA processing	2/703	2/17	0.109571532127314	0.433630057447126	0.390018035969514	TBL3/TSR1	2	17	703	20973	17/20973
	GO:0000479	endonucleolytic cleavage of tricistronic rRNA transcript (SSU-rRNA, 5.8S rRNA, LSU-rRNA)	2/703	2/17	0.109571532127314	0.433630057447126	0.390018035969514	TBL3/TSR1	2	17	703	20973	17/20973
	GO:0006089	lactate metabolic process	2/703	2/17	0.109571532127314	0.433630057447126	0.390018035969514	PFKFB2/TP53	2	17	703	20973	17/20973
	GO:0006527	arginine catabolic process	2/703	2/17	0.109571532127314	0.433630057447126	0.390018035969514	DDAH1/ARG2	2	17	703	20973	17/20973
	GO:0006577	amino-acid betaine metabolic process	2/703	2/17	0.109571532127314	0.433630057447126	0.390018035969514	CRAT/ACADL	2	17	703	20973	17/20973
	GO:0006857	oligopeptide transport	2/703	2/17	0.109571532127314	0.433630057447126	0.390018035969514	SLC7A11/GJA1	2	17	703	20973	17/20973
	GO:0006978	DNA damage response, signal transduction by p53 class mediator resulting in transcription of p21 class mediator	2/703	2/17	0.109571532127314	0.433630057447126	0.390018035969514	TP53/ZNF385A	2	17	703	20973	17/20973
	GO:0009130	pyrimidine nucleoside monophosphate biosynthetic process	2/703	2/17	0.109571532127314	0.433630057447126	0.390018035969514	UMPS/SHMT1	2	17	703	20973	17/20973
	GO:0009208	pyrimidine ribonucleoside triphosphate metabolic process	2/703	2/17	0.109571532127314	0.433630057447126	0.390018035969514	NME2/ENTPD7	2	17	703	20973	17/20973
	GO:0018146	keratan sulfate biosynthetic process	2/703	2/17	0.109571532127314	0.433630057447126	0.390018035969514	B4GALT4/B4GAT1	2	17	703	20973	17/20973
	GO:0020027	hemoglobin metabolic process	2/703	2/17	0.109571532127314	0.433630057447126	0.390018035969514	KLF4/ABCB10	2	17	703	20973	17/20973
	GO:0043249	erythrocyte maturation	2/703	2/17	0.109571532127314	0.433630057447126	0.390018035969514	TRIM58/G6PD	2	17	703	20973	17/20973
	GO:0045651	positive regulation of macrophage differentiation	2/703	2/17	0.109571532127314	0.433630057447126	0.390018035969514	HCLS1/ROR2	2	17	703	20973	17/20973
	GO:0046834	lipid phosphorylation	2/703	2/17	0.109571532127314	0.433630057447126	0.390018035969514	AGK/CERK	2	17	703	20973	17/20973
	GO:0048385	regulation of retinoic acid receptor signaling pathway	2/703	2/17	0.109571532127314	0.433630057447126	0.390018035969514	PRAME/CTBP2	2	17	703	20973	17/20973
	GO:0055091	phospholipid homeostasis	2/703	2/17	0.109571532127314	0.433630057447126	0.390018035969514	ABCA1/ABCA3	2	17	703	20973	17/20973
	GO:0061450	trophoblast cell migration	2/703	2/17	0.109571532127314	0.433630057447126	0.390018035969514	C1QBP/GJA1	2	17	703	20973	17/20973
	GO:0061548	ganglion development	2/703	2/17	0.109571532127314	0.433630057447126	0.390018035969514	NRP1/CTNNB1	2	17	703	20973	17/20973
	GO:0070593	dendrite self-avoidance	2/703	2/17	0.109571532127314	0.433630057447126	0.390018035969514	BSG/NEXN	2	17	703	20973	17/20973
	GO:0072224	metanephric glomerulus development	2/703	2/17	0.109571532127314	0.433630057447126	0.390018035969514	LAMB2/PAX2	2	17	703	20973	17/20973
	GO:0097201	negative regulation of transcription from RNA polymerase II promoter in response to stress	2/703	2/17	0.109571532127314	0.433630057447126	0.390018035969514	BAG3/HIF1AN	2	17	703	20973	17/20973
	GO:1903541	regulation of exosomal secretion	2/703	2/17	0.109571532127314	0.433630057447126	0.390018035969514	SDC4/SDC1	2	17	703	20973	17/20973
	GO:1903960	negative regulation of anion transmembrane transport	2/703	2/17	0.109571532127314	0.433630057447126	0.390018035969514	SLC43A2/SLC43A1	2	17	703	20973	17/20973
	GO:1905907	negative regulation of amyloid fibril formation	2/703	2/17	0.109571532127314	0.433630057447126	0.390018035969514	CLU/APOE	2	17	703	20973	17/20973
	GO:0051604	protein maturation	16/703	16/340	0.109731409932566	0.433630057447126	0.390018035969514	TSPAN14/CASP7/GLRX3/F3/PGK1/BCHE/TSPAN33/SNX12/PSEN2/LDLRAD3/GGT1/OMA1/SPG7/THBS1/HGFAC/TYSND1	16	340	703	20973	340/20973
	GO:0071560	cellular response to transforming growth factor beta stimulus	13/703	13/264	0.108422537140641	0.433630057447126	0.390018035969514	FERMT1/HPGD/PML/STAT3/LIMS1/TGFBR3/ARRB2/ZMIZ1/PEG10/THBS1/BMPR1A/TP53/CAV1	13	264	703	20973	264/20973
	GO:0043409	negative regulation of MAPK cascade	10/703	10/191	0.10972549537968	0.433630057447126	0.390018035969514	EIF3A/IGBP1/PEBP1/CSK/PPIA/PAFAH1B1/CAV1/APOE/INPP5K/F2RL1	10	191	703	20973	191/20973
	GO:0001738	morphogenesis of a polarized epithelium	6/703	6/98	0.111312455697723	0.43528015001398	0.391502171700051	MSN/ROR2/DVL2/DAAM1/PAFAH1B1/CELSR1	6	98	703	20973	98/20973
	GO:0035023	regulation of Rho protein signal transduction	6/703	6/98	0.111312455697723	0.43528015001398	0.391502171700051	ABCA1/NRP1/ARHGDIA/ARRB1/APOE/F2RL1	6	98	703	20973	98/20973
	GO:0003281	ventricular septum development	5/703	5/76	0.111452635437037	0.43528015001398	0.391502171700051	TBX5/TGFBR3/SALL4/BMPR1A/CCN1	5	76	703	20973	76/20973
	GO:0031507	heterochromatin assembly	5/703	5/76	0.111452635437037	0.43528015001398	0.391502171700051	RESF1/HMGA2/ZDBF2/CENPV/NDN	5	76	703	20973	76/20973
	GO:0099518	vesicle cytoskeletal trafficking	5/703	5/76	0.111452635437037	0.43528015001398	0.391502171700051	CCDC186/F8A1/KIF1C/PAFAH1B1/MYO1C	5	76	703	20973	76/20973
	GO:0001516	prostaglandin biosynthetic process	3/703	3/35	0.111543261665244	0.43528015001398	0.391502171700051	ANXA1/CBR1/MIF	3	35	703	20973	35/20973
	GO:0002431	Fc receptor mediated stimulatory signaling pathway	3/703	3/35	0.111543261665244	0.43528015001398	0.391502171700051	VAV2/CSK/PLD2	3	35	703	20973	35/20973
	GO:0006829	zinc ion transport	3/703	3/35	0.111543261665244	0.43528015001398	0.391502171700051	SLC39A11/SLC39A14/SLC39A1	3	35	703	20973	35/20973
	GO:0009303	rRNA transcription	3/703	3/35	0.111543261665244	0.43528015001398	0.391502171700051	TP53/MACROH2A2/NCL	3	35	703	20973	35/20973
	GO:0033028	myeloid cell apoptotic process	3/703	3/35	0.111543261665244	0.43528015001398	0.391502171700051	ANXA1/MIF/SLC7A11	3	35	703	20973	35/20973
	GO:0043171	peptide catabolic process	3/703	3/35	0.111543261665244	0.43528015001398	0.391502171700051	ANPEP/GGT1/XPNPEP1	3	35	703	20973	35/20973
	GO:0045922	negative regulation of fatty acid metabolic process	3/703	3/35	0.111543261665244	0.43528015001398	0.391502171700051	ERLIN1/ACADVL/ACADL	3	35	703	20973	35/20973
	GO:0046457	prostanoid biosynthetic process	3/703	3/35	0.111543261665244	0.43528015001398	0.391502171700051	ANXA1/CBR1/MIF	3	35	703	20973	35/20973
	GO:0070229	negative regulation of lymphocyte apoptotic process	3/703	3/35	0.111543261665244	0.43528015001398	0.391502171700051	MIF/AURKB/ARG2	3	35	703	20973	35/20973
	GO:0070670	response to interleukin-4	3/703	3/35	0.111543261665244	0.43528015001398	0.391502171700051	PARP14/PML/SHPK	3	35	703	20973	35/20973
	GO:0071218	cellular response to misfolded protein	3/703	3/35	0.111543261665244	0.43528015001398	0.391502171700051	UFD1/BAG6/TOR1A	3	35	703	20973	35/20973
	GO:0006636	unsaturated fatty acid biosynthetic process	4/703	4/55	0.112253926987113	0.436009615319306	0.392158271573215	ANXA1/CBR1/MIF/SCD	4	55	703	20973	55/20973
	GO:0051496	positive regulation of stress fiber assembly	4/703	4/55	0.112253926987113	0.436009615319306	0.392158271573215	NRP1/SDC4/LIMCH1/CCN2	4	55	703	20973	55/20973
	GO:0060071	Wnt signaling pathway, planar cell polarity pathway	4/703	4/55	0.112253926987113	0.436009615319306	0.392158271573215	ROR2/DVL2/DAAM1/CELSR1	4	55	703	20973	55/20973
	GO:0072698	protein localization to microtubule cytoskeleton	4/703	4/55	0.112253926987113	0.436009615319306	0.392158271573215	MID1/MAP1A/KIF20B/KIAA0753	4	55	703	20973	55/20973
	GO:1903202	negative regulation of oxidative stress-induced cell death	4/703	4/55	0.112253926987113	0.436009615319306	0.392158271573215	TXN/PPIA/SLC7A11/CTNNB1	4	55	703	20973	55/20973
	GO:1905953	negative regulation of lipid localization	4/703	4/55	0.112253926987113	0.436009615319306	0.392158271573215	ABCA1/CES1/ABCA2/THBS1	4	55	703	20973	55/20973
	GO:1902749	regulation of cell cycle G2/M phase transition	7/703	7/121	0.112393047437552	0.436210778516372	0.392339202930905	FBXO5/HMGA2/UIMC1/TP53/AURKB/CCND1/HSPA2	7	121	703	20973	121/20973
	GO:0035148	tube formation	9/703	9/168	0.11260362962926	0.436688765526518	0.392769116751948	SALL4/PAX2/SDC4/DVL2/KIF20B/CTNNB1/PODXL/CELSR1/SPINT2	9	168	703	20973	168/20973
	GO:0034976	response to endoplasmic reticulum stress	14/703	14/291	0.112999763022621	0.437885039796734	0.393845076624511	YOD1/PML/UFD1/BAG6/FBXO17/TOR1A/THBS1/ERLIN1/CLU/ATP2A3/TP53/CAV1/DERL2/CCND1	14	291	703	20973	291/20973
	GO:0044772	mitotic cell cycle phase transition	21/703	21/471	0.113929147707089	0.4411442579821	0.396776501357696	SLFN11/ANXA1/KLF4/CACUL1/PML/CALM1/UBE2S/KLHL18/FBXO5/CKS1B/CDCA5/HMGA2/UIMC1/BUB1B/BUB1/ECD/TP53/AURKB/CCND2/CCND1/HSPA2	21	471	703	20973	471/20973
	GO:0007498	mesoderm development	8/703	8/145	0.114843339833157	0.443554153083753	0.398944023046511	KLF4/HMGA2/PAX2/EPHA2/KDM6B/ITGA2/BMPR1A/GJA1	8	145	703	20973	145/20973
	GO:0043467	regulation of generation of precursor metabolites and energy	8/703	8/145	0.114843339833157	0.443554153083753	0.398944023046511	AK4/STAT3/CISD1/PGAM1/GHITM/ENPP1/TP53/INPP5K	8	145	703	20973	145/20973
	GO:0030901	midbrain development	6/703	6/99	0.11535071969085	0.443554153083753	0.398944023046511	CALM1/G6PD/GLUD1/YWHAE/CTNNB1/INA	6	99	703	20973	99/20973
	GO:0060021	roof of mouth development	6/703	6/99	0.11535071969085	0.443554153083753	0.398944023046511	PLEKHA1/ANP32B/TGFBR3/SGPL1/COL2A1/BMPR1A	6	99	703	20973	99/20973
	GO:0060761	negative regulation of response to cytokine stimulus	6/703	6/99	0.11535071969085	0.443554153083753	0.398944023046511	PARP14/KLF4/STAT2/PALM3/CAV1/F2RL1	6	99	703	20973	99/20973
	GO:0072080	nephron tubule development	6/703	6/99	0.11535071969085	0.443554153083753	0.398944023046511	ILK/DCHS1/PAX2/PROM1/LZTS2/CTNNB1	6	99	703	20973	99/20973
	GO:2001021	negative regulation of response to DNA damage stimulus	6/703	6/99	0.11535071969085	0.443554153083753	0.398944023046511	CD44/FBXO5/MIF/HMGA2/CLU/ZNF385A	6	99	703	20973	99/20973
	GO:0001666	response to hypoxia	15/703	15/317	0.114695609325461	0.443554153083753	0.398944023046511	AK4/LMNA/PGK1/ITPR2/PML/TGFBR3/HIF1AN/THBS1/ITGA2/DDAH1/ALKBH5/TP53/CAV1/AGTRAP/CLDN3	15	317	703	20973	317/20973
	GO:0006941	striated muscle contraction	10/703	10/193	0.115318118935156	0.443554153083753	0.398944023046511	ANK2/GSTM2/CALM1/PKP2/MAP2K3/DSC2/CAV1/CCN2/GJA1/ARG2	10	193	703	20973	193/20973
	GO:0061351	neural precursor cell proliferation	8/703	8/146	0.118167227833772	0.447696506667463	0.402669762490223	ILK/TEAD3/CTNNA1/PAFAH1B1/CTNNB1/TP53/CDH2/SPINT2	8	146	703	20973	146/20973
	GO:0034308	primary alcohol metabolic process	7/703	7/123	0.119688043474406	0.447696506667463	0.402669762490223	ALDH1A2/AKR1C1/THTPA/ALDH3A2/DGAT1/ALDH2/TKTL1	7	123	703	20973	123/20973
	GO:0034502	protein localization to chromosome	6/703	6/100	0.119461771618598	0.447696506667463	0.402669762490223	CDCA5/WRAP53/SLF2/HASPIN/MACROH2A2/AURKB	6	100	703	20973	100/20973
	GO:0051304	chromosome separation	6/703	6/100	0.119461771618598	0.447696506667463	0.402669762490223	FBXO5/BUB1B/RMI1/BUB1/TOP3A/AURKB	6	100	703	20973	100/20973
	GO:0006778	porphyrin-containing compound metabolic process	4/703	4/56	0.117875740864046	0.447696506667463	0.402669762490223	BLVRB/ABCB7/ABCB10/COX15	4	56	703	20973	56/20973
	GO:0048008	platelet-derived growth factor receptor signaling pathway	4/703	4/56	0.117875740864046	0.447696506667463	0.402669762490223	F3/NRP1/PLEKHA1/SGPL1	4	56	703	20973	56/20973
	GO:0071320	cellular response to cAMP	4/703	4/56	0.117875740864046	0.447696506667463	0.402669762490223	ASS1/ITPR2/CPS1/INPP5K	4	56	703	20973	56/20973
	GO:1902743	regulation of lamellipodium organization	4/703	4/56	0.117875740864046	0.447696506667463	0.402669762490223	PDPN/CD44/EPHA2/ARPIN	4	56	703	20973	56/20973
	GO:0006779	porphyrin-containing compound biosynthetic process	3/703	3/36	0.118815286458841	0.447696506667463	0.402669762490223	ABCB7/ABCB10/COX15	3	36	703	20973	36/20973
	GO:0010614	negative regulation of cardiac muscle hypertrophy	3/703	3/36	0.118815286458841	0.447696506667463	0.402669762490223	GLRX3/LMNA/G6PD	3	36	703	20973	36/20973
	GO:0032891	negative regulation of organic acid transport	3/703	3/36	0.118815286458841	0.447696506667463	0.402669762490223	SLC43A2/THBS1/SLC43A1	3	36	703	20973	36/20973
	GO:0033014	tetrapyrrole biosynthetic process	3/703	3/36	0.118815286458841	0.447696506667463	0.402669762490223	ABCB7/ABCB10/COX15	3	36	703	20973	36/20973
	GO:0046856	phosphatidylinositol dephosphorylation	3/703	3/36	0.118815286458841	0.447696506667463	0.402669762490223	INPP5F/INPP5A/INPP5K	3	36	703	20973	36/20973
	GO:0048741	skeletal muscle fiber development	3/703	3/36	0.118815286458841	0.447696506667463	0.402669762490223	PLEC/NIBAN2/MYORG	3	36	703	20973	36/20973
	GO:1904893	negative regulation of receptor signaling pathway via STAT	3/703	3/36	0.118815286458841	0.447696506667463	0.402669762490223	PARP14/INPP5F/CAV1	3	36	703	20973	36/20973
	GO:2000047	regulation of cell-cell adhesion mediated by cadherin	3/703	3/36	0.118815286458841	0.447696506667463	0.402669762490223	FOXA1/PTPRU/EPCAM	3	36	703	20973	36/20973
	GO:0001522	pseudouridine synthesis	2/703	2/18	0.120640540135016	0.447696506667463	0.402669762490223	TRUB1/PUS10	2	18	703	20973	18/20973
	GO:0001765	membrane raft assembly	2/703	2/18	0.120640540135016	0.447696506667463	0.402669762490223	RFTN1/CAV1	2	18	703	20973	18/20973
	GO:0001946	lymphangiogenesis	2/703	2/18	0.120640540135016	0.447696506667463	0.402669762490223	PDPN/EPHA2	2	18	703	20973	18/20973
	GO:0002031	G protein-coupled receptor internalization	2/703	2/18	0.120640540135016	0.447696506667463	0.402669762490223	ARRB1/ARRB2	2	18	703	20973	18/20973
	GO:0006544	glycine metabolic process	2/703	2/18	0.120640540135016	0.447696506667463	0.402669762490223	GLDC/SHMT1	2	18	703	20973	18/20973
	GO:0006977	DNA damage response, signal transduction by p53 class mediator resulting in cell cycle arrest	2/703	2/18	0.120640540135016	0.447696506667463	0.402669762490223	PML/TP53	2	18	703	20973	18/20973
	GO:0006991	response to sterol depletion	2/703	2/18	0.120640540135016	0.447696506667463	0.402669762490223	ERLIN1/SREBF1	2	18	703	20973	18/20973
	GO:0007625	grooming behavior	2/703	2/18	0.120640540135016	0.447696506667463	0.402669762490223	APRT/HPRT1	2	18	703	20973	18/20973
	GO:0009125	nucleoside monophosphate catabolic process	2/703	2/18	0.120640540135016	0.447696506667463	0.402669762490223	TYMP/HPRT1	2	18	703	20973	18/20973
	GO:0030299	intestinal cholesterol absorption	2/703	2/18	0.120640540135016	0.447696506667463	0.402669762490223	AKR1C1/LIMA1	2	18	703	20973	18/20973
	GO:0032026	response to magnesium ion	2/703	2/18	0.120640540135016	0.447696506667463	0.402669762490223	THBS1/CCND1	2	18	703	20973	18/20973
	GO:0032354	response to follicle-stimulating hormone	2/703	2/18	0.120640540135016	0.447696506667463	0.402669762490223	GCLC/TGFBR3	2	18	703	20973	18/20973
	GO:0036342	post-anal tail morphogenesis	2/703	2/18	0.120640540135016	0.447696506667463	0.402669762490223	DCHS1/EPHA2	2	18	703	20973	18/20973
	GO:0042772	DNA damage response, signal transduction resulting in transcription	2/703	2/18	0.120640540135016	0.447696506667463	0.402669762490223	TP53/ZNF385A	2	18	703	20973	18/20973
	GO:0046838	phosphorylated carbohydrate dephosphorylation	2/703	2/18	0.120640540135016	0.447696506667463	0.402669762490223	INPP5A/INPP5K	2	18	703	20973	18/20973
	GO:0046855	inositol phosphate dephosphorylation	2/703	2/18	0.120640540135016	0.447696506667463	0.402669762490223	INPP5A/INPP5K	2	18	703	20973	18/20973
	GO:0051969	regulation of transmission of nerve impulse	2/703	2/18	0.120640540135016	0.447696506667463	0.402669762490223	TYMP/ITGA2	2	18	703	20973	18/20973
	GO:0055089	fatty acid homeostasis	2/703	2/18	0.120640540135016	0.447696506667463	0.402669762490223	APOE/DGAT1	2	18	703	20973	18/20973
	GO:0060008	Sertoli cell differentiation	2/703	2/18	0.120640540135016	0.447696506667463	0.402669762490223	FNDC3A/SDC1	2	18	703	20973	18/20973
	GO:0060644	mammary gland epithelial cell differentiation	2/703	2/18	0.120640540135016	0.447696506667463	0.402669762490223	MGMT/LBH	2	18	703	20973	18/20973
	GO:0061952	midbody abscission	2/703	2/18	0.120640540135016	0.447696506667463	0.402669762490223	CHMP1A/CEP55	2	18	703	20973	18/20973
	GO:1903441	protein localization to ciliary membrane	2/703	2/18	0.120640540135016	0.447696506667463	0.402669762490223	RABEP1/IFT80	2	18	703	20973	18/20973
	GO:2000136	regulation of cell proliferation involved in heart morphogenesis	2/703	2/18	0.120640540135016	0.447696506667463	0.402669762490223	TBX5/CTNNB1	2	18	703	20973	18/20973
	GO:2000369	regulation of clathrin-dependent endocytosis	2/703	2/18	0.120640540135016	0.447696506667463	0.402669762490223	SH3GL3/DNAJC6	2	18	703	20973	18/20973
	GO:0050767	regulation of neurogenesis	18/703	18/395	0.117314579671015	0.447696506667463	0.402669762490223	CDKL5/RNF10/ARHGAP4/NRP1/MAPT/SHTN1/THY1/ITPKA/BMPR1A/LRP4/EFNB3/CTNNA1/PAFAH1B1/OBSL1/CTNNB1/TP53/CRABP2/LIN28A	18	395	703	20973	395/20973
	GO:0015711	organic anion transport	18/703	18/396	0.119291754876047	0.447696506667463	0.402669762490223	ANXA1/PRAF2/SLC38A5/SLC6A11/AKR1C1/SLC7A3/CES1/CYB5R2/MIF/SLC25A22/SLC25A32/SLC43A2/SV2A/SLC25A11/SLC7A11/SLC43A1/GJA1/SLC7A6	18	396	703	20973	396/20973
	GO:0071692	protein localization to extracellular region	18/703	18/396	0.119291754876047	0.447696506667463	0.402669762490223	ANXA1/ABCA1/PFKFB2/CCDC186/SERGEF/PFKM/PPIA/CAMK2G/GLUD1/MYRIP/SRCIN1/SREBF1/PAFAH1B1/EXPH5/APOE/MYH10/LLGL1/F2RL1	18	396	703	20973	396/20973
	GO:0006936	muscle contraction	17/703	17/370	0.118822806431504	0.447696506667463	0.402669762490223	ANK2/GSTM2/HSBP1/CALM1/CALD1/PKP2/MYLK/TMOD1/MYL6B/MAP2K3/ITGA2/GNAO1/DSC2/CAV1/CCN2/GJA1/ARG2	17	370	703	20973	370/20973
	GO:0090596	sensory organ morphogenesis	14/703	14/294	0.119867125743276	0.447696506667463	0.402669762490223	HMX3/STAT3/MAPK1/PAX2/COL2A1/EPHA2/THY1/ROR2/SHROOM2/DVL2/NECTIN3/PROM1/OBSL1/CTNNB1	14	294	703	20973	294/20973
	GO:0016485	protein processing	13/703	13/268	0.117860654151881	0.447696506667463	0.402669762490223	CASP7/F3/PGK1/BCHE/SNX12/PSEN2/LDLRAD3/GGT1/OMA1/SPG7/THBS1/HGFAC/TYSND1	13	268	703	20973	268/20973
	GO:0045930	negative regulation of mitotic cell cycle	13/703	13/269	0.120292385704911	0.447696506667463	0.402669762490223	SLFN11/KLF4/PML/FBXO5/HMGA2/UIMC1/BUB1B/TOM1L2/BUB1/CTNNB1/TP53/AURKB/CCND1	13	269	703	20973	269/20973
	GO:0045428	regulation of nitric oxide biosynthetic process	5/703	5/78	0.120860762341911	0.447848299627482	0.402806288985848	KLF4/ASS1/DDAH1/CLU/CAV1	5	78	703	20973	78/20973
	GO:0086003	cardiac muscle cell contraction	5/703	5/78	0.120860762341911	0.447848299627482	0.402806288985848	ANK2/PKP2/DSC2/CAV1/GJA1	5	78	703	20973	78/20973
	GO:0032677	regulation of interleukin-8 production	7/703	7/124	0.123425134197248	0.453787828347572	0.408148454009259	MYD88/ANXA1/KLF4/F3/STAT3/ARRB1/F2RL1	7	124	703	20973	124/20973
	GO:0051492	regulation of stress fiber assembly	6/703	6/101	0.123644691567777	0.453787828347572	0.408148454009259	NRP1/CGNL1/SDC4/LIMCH1/INPP5K/CCN2	6	101	703	20973	101/20973
	GO:0001709	cell fate determination	4/703	4/57	0.123617267929216	0.453787828347572	0.408148454009259	KLF4/PAX2/CTNNB1/IFRD1	4	57	703	20973	57/20973
	GO:0003179	heart valve morphogenesis	4/703	4/57	0.123617267929216	0.453787828347572	0.408148454009259	TBX5/DCHS1/BMPR1A/CCN1	4	57	703	20973	57/20973
	GO:0003229	ventricular cardiac muscle tissue development	4/703	4/57	0.123617267929216	0.453787828347572	0.408148454009259	TBX5/TGFBR3/PKP2/BMPR1A	4	57	703	20973	57/20973
	GO:0007157	heterophilic cell-cell adhesion via plasma membrane cell adhesion molecules	4/703	4/57	0.123617267929216	0.453787828347572	0.408148454009259	DCHS1/CXADR/NECTIN3/CDH2	4	57	703	20973	57/20973
	GO:0042306	regulation of protein import into nucleus	4/703	4/57	0.123617267929216	0.453787828347572	0.408148454009259	FERMT1/BAG3/HCLS1/NOLC1	4	57	703	20973	57/20973
	GO:0042311	vasodilation	4/703	4/57	0.123617267929216	0.453787828347572	0.408148454009259	CPS1/ITGA1/APOE/F2RL1	4	57	703	20973	57/20973
	GO:0043647	inositol phosphate metabolic process	4/703	4/57	0.123617267929216	0.453787828347572	0.408148454009259	INPP5A/MINPP1/ITPKA/INPP5K	4	57	703	20973	57/20973
	GO:0061028	establishment of endothelial barrier	4/703	4/57	0.123617267929216	0.453787828347572	0.408148454009259	MYD88/MSN/F2RL1/CLDN3	4	57	703	20973	57/20973
	GO:2000107	negative regulation of leukocyte apoptotic process	4/703	4/57	0.123617267929216	0.453787828347572	0.408148454009259	HCLS1/MIF/AURKB/ARG2	4	57	703	20973	57/20973
	GO:0010038	response to metal ion	17/703	17/372	0.12297114637201	0.453787828347572	0.408148454009259	NQO1/MT2A/ASS1/CPS1/MAPT/CALM1/GCLC/MAPK1/SORD/G6PD/NUDT1/BSG/ADCY7/THBS1/CAV1/SDC1/CCND1	17	372	703	20973	372/20973
	GO:0071559	response to transforming growth factor beta	13/703	13/270	0.12275283502058	0.453787828347572	0.408148454009259	FERMT1/HPGD/PML/STAT3/LIMS1/TGFBR3/ARRB2/ZMIZ1/PEG10/THBS1/BMPR1A/TP53/CAV1	13	270	703	20973	270/20973
	GO:0007565	female pregnancy	10/703	10/196	0.124000802331477	0.454760651722268	0.409023436394424	HPGD/HMX3/PRDX3/UMPS/BSG/TEAD3/ADCY7/ITGA2/C1QBP/GJA1	10	196	703	20973	196/20973
	GO:1900180	regulation of protein localization to nucleus	8/703	8/148	0.124967260500682	0.457329179756212	0.411333636625997	FERMT1/BAG3/LMNA/HCLS1/ILRUN/CTNNA1/LZTS2/NOLC1	8	148	703	20973	148/20973
	GO:0035924	cellular response to vascular endothelial growth factor stimulus	5/703	5/79	0.12569988587722	0.457329179756212	0.411333636625997	ANXA1/NRP1/MAP2K3/MYO1C/CD63	5	79	703	20973	79/20973
	GO:0072078	nephron tubule morphogenesis	5/703	5/79	0.12569988587722	0.457329179756212	0.411333636625997	ILK/DCHS1/PAX2/LZTS2/CTNNB1	5	79	703	20973	79/20973
	GO:0140115	export across plasma membrane	5/703	5/79	0.12569988587722	0.457329179756212	0.411333636625997	ABCA1/CALM1/SLC22A5/YWHAE/GJA1	5	79	703	20973	79/20973
	GO:1903051	negative regulation of proteolysis involved in cellular protein catabolic process	5/703	5/79	0.12569988587722	0.457329179756212	0.411333636625997	PML/F8A1/EIF3H/BAG6/MAP1A	5	79	703	20973	79/20973
	GO:0002446	neutrophil mediated immunity	3/703	3/37	0.126257645422185	0.457329179756212	0.411333636625997	MYD88/ANXA3/F2RL1	3	37	703	20973	37/20973
	GO:0010762	regulation of fibroblast migration	3/703	3/37	0.126257645422185	0.457329179756212	0.411333636625997	ARHGAP4/SDC4/THBS1	3	37	703	20973	37/20973
	GO:0015813	L-glutamate transmembrane transport	3/703	3/37	0.126257645422185	0.457329179756212	0.411333636625997	PRAF2/SLC25A22/SLC7A11	3	37	703	20973	37/20973
	GO:0032212	positive regulation of telomere maintenance via telomerase	3/703	3/37	0.126257645422185	0.457329179756212	0.411333636625997	MAPK1/CTNNB1/AURKB	3	37	703	20973	37/20973
	GO:0033238	regulation of cellular amine metabolic process	3/703	3/37	0.126257645422185	0.457329179756212	0.411333636625997	HPRT1/SLC7A11/ALDH2	3	37	703	20973	37/20973
	GO:0035633	maintenance of blood-brain barrier	3/703	3/37	0.126257645422185	0.457329179756212	0.411333636625997	JAM2/GJA1/CLDN3	3	37	703	20973	37/20973
	GO:0055023	positive regulation of cardiac muscle tissue growth	3/703	3/37	0.126257645422185	0.457329179756212	0.411333636625997	TBX5/TGFBR3/BMPR1A	3	37	703	20973	37/20973
	GO:0060323	head morphogenesis	3/703	3/37	0.126257645422185	0.457329179756212	0.411333636625997	PLEKHA1/SGPL1/CRISPLD1	3	37	703	20973	37/20973
	GO:0060441	epithelial tube branching involved in lung morphogenesis	3/703	3/37	0.126257645422185	0.457329179756212	0.411333636625997	FOXA1/CTNNB1/CELSR1	3	37	703	20973	37/20973
	GO:0065005	protein-lipid complex assembly	3/703	3/37	0.126257645422185	0.457329179756212	0.411333636625997	ABCA1/APOE/DGAT1	3	37	703	20973	37/20973
	GO:0006364	rRNA processing	12/703	12/246	0.125470901104182	0.457329179756212	0.411333636625997	ERI2/PIN4/UTP11/TBL3/WDR18/RRP12/TSR1/PELP1/GEMIN4/SNU13/NOLC1/MRM3	12	246	703	20973	246/20973
	GO:0006403	RNA localization	11/703	11/221	0.125122973402241	0.457329179756212	0.411333636625997	NXF2/SNUPN/WRAP53/PEG10/RFTN1/ALKBH5/NCBP3/SMG6/HNRNPA3/MYO1C/ZNF385A	11	221	703	20973	221/20973
	GO:0097696	receptor signaling pathway via STAT	10/703	10/197	0.126972567216451	0.459585487859544	0.413363018214959	PARP14/INPP5F/STAT3/HCLS1/OCIAD2/STAT2/STAMBP/OCIAD1/CRLF1/CAV1	10	197	703	20973	197/20973
	GO:0032637	interleukin-8 production	7/703	7/125	0.127221148101033	0.460151799250295	0.413872373257523	MYD88/ANXA1/KLF4/F3/STAT3/ARRB1/F2RL1	7	125	703	20973	125/20973
	GO:0001523	retinoid metabolic process	6/703	6/102	0.127898512180441	0.46126575331502	0.414874292218219	ALDH1A2/AKR1C1/RBP1/RARRES2/DGAT1/CRABP2	6	102	703	20973	102/20973
	GO:0061326	renal tubule development	6/703	6/102	0.127898512180441	0.46126575331502	0.414874292218219	ILK/DCHS1/PAX2/PROM1/LZTS2/CTNNB1	6	102	703	20973	102/20973
	GO:1903035	negative regulation of response to wounding	6/703	6/102	0.127898512180441	0.46126575331502	0.414874292218219	CD9/INPP5F/THBS1/EPPK1/APOE/CLDN3	6	102	703	20973	102/20973
	GO:2001252	positive regulation of chromosome organization	6/703	6/102	0.127898512180441	0.46126575331502	0.414874292218219	PML/MAPK1/RESF1/SLF2/CTNNB1/AURKB	6	102	703	20973	102/20973
	GO:0009267	cellular response to starvation	9/703	9/173	0.128186946651553	0.46163936447333	0.415210327711327	WDR45/MAPK1/TTC5/XPR1/SREBF1/DSC2/TP53/MYBBP1A/FAS	9	173	703	20973	173/20973
	GO:0048592	eye morphogenesis	9/703	9/173	0.128186946651553	0.46163936447333	0.415210327711327	STAT3/PAX2/EPHA2/THY1/SHROOM2/NECTIN3/PROM1/OBSL1/CTNNB1	9	173	703	20973	173/20973
	GO:0051960	regulation of nervous system development	21/703	21/479	0.128549960448261	0.462613150172236	0.416086175635658	CDKL5/RNF10/ARHGAP4/NRP1/TYMP/MAPT/SHTN1/THY1/JAM2/ITPKA/BMPR1A/LRP4/EFNB3/CTNNA1/PAFAH1B1/OBSL1/CTNNB1/LRRN1/TP53/CRABP2/LIN28A	21	479	703	20973	479/20973
	GO:0015980	energy derivation by oxidation of organic compounds	16/703	16/349	0.128937787502177	0.463674764991631	0.417041019331812	AK4/PFKM/PLEC/CISD1/SLC25A22/MTFR2/COA6/GFPT2/GHITM/IDH2/ENPP1/TP53/MYBBP1A/COX15/INPP5K/ACADVL	16	349	703	20973	349/20973
	GO:0051494	negative regulation of cytoskeleton organization	9/703	9/174	0.1314346309095	0.464213480786825	0.417525554185379	TUBB4A/CGNL1/ADD3/TMOD1/LIMA1/MID1/SPTBN2/INPP5K/ARPIN	9	174	703	20973	174/20973
	GO:0030168	platelet activation	8/703	8/150	0.131967512601845	0.464213480786825	0.417525554185379	CD9/PDPN/VAV2/ILK/PPIA/SLC7A11/APOE/GNAS	8	150	703	20973	150/20973
	GO:0051225	spindle assembly	8/703	8/150	0.131967512601845	0.464213480786825	0.417525554185379	BCCIP/ABRAXAS2/TUBGCP2/FBXO5/CHMP1A/KIF11/LZTS2/AURKB	8	150	703	20973	150/20973
	GO:0001885	endothelial cell development	5/703	5/80	0.130626814931564	0.464213480786825	0.417525554185379	MYD88/MSN/COL18A1/F2RL1/CLDN3	5	80	703	20973	80/20973
	GO:0007422	peripheral nervous system development	5/703	5/80	0.130626814931564	0.464213480786825	0.417525554185379	UGT8/LAMB2/PLEC/ILK/ALDH3A2	5	80	703	20973	80/20973
	GO:0008344	adult locomotory behavior	5/703	5/80	0.130626814931564	0.464213480786825	0.417525554185379	INPP5F/ARRB2/TMOD1/EFNB3/PAFAH1B1	5	80	703	20973	80/20973
	GO:0045429	positive regulation of nitric oxide biosynthetic process	4/703	4/58	0.129475230469468	0.464213480786825	0.417525554185379	KLF4/ASS1/DDAH1/CLU	4	58	703	20973	58/20973
	GO:0000097	sulfur amino acid biosynthetic process	2/703	2/19	0.131968597140599	0.464213480786825	0.417525554185379	MRI1/GGT1	2	19	703	20973	19/20973
	GO:0007076	mitotic chromosome condensation	2/703	2/19	0.131968597140599	0.464213480786825	0.417525554185379	CHMP1A/CDCA5	2	19	703	20973	19/20973
	GO:0009223	pyrimidine deoxyribonucleotide catabolic process	2/703	2/19	0.131968597140599	0.464213480786825	0.417525554185379	TYMP/DCTPP1	2	19	703	20973	19/20973
	GO:0010544	negative regulation of platelet activation	2/703	2/19	0.131968597140599	0.464213480786825	0.417525554185379	CD9/APOE	2	19	703	20973	19/20973
	GO:0019081	viral translation	2/703	2/19	0.131968597140599	0.464213480786825	0.417525554185379	EIF3A/EIF3L	2	19	703	20973	19/20973
	GO:0033631	cell-cell adhesion mediated by integrin	2/703	2/19	0.131968597140599	0.464213480786825	0.417525554185379	PODXL/PLPP3	2	19	703	20973	19/20973
	GO:0034433	steroid esterification	2/703	2/19	0.131968597140599	0.464213480786825	0.417525554185379	ABCA2/APOE	2	19	703	20973	19/20973
	GO:0034434	sterol esterification	2/703	2/19	0.131968597140599	0.464213480786825	0.417525554185379	ABCA2/APOE	2	19	703	20973	19/20973
	GO:0034435	cholesterol esterification	2/703	2/19	0.131968597140599	0.464213480786825	0.417525554185379	ABCA2/APOE	2	19	703	20973	19/20973
	GO:0042339	keratan sulfate metabolic process	2/703	2/19	0.131968597140599	0.464213480786825	0.417525554185379	B4GALT4/B4GAT1	2	19	703	20973	19/20973
	GO:0042790	nucleolar large rRNA transcription by RNA polymerase I	2/703	2/19	0.131968597140599	0.464213480786825	0.417525554185379	MACROH2A2/NCL	2	19	703	20973	19/20973
	GO:0043217	myelin maintenance	2/703	2/19	0.131968597140599	0.464213480786825	0.417525554185379	PLEC/CLU	2	19	703	20973	19/20973
	GO:0043922	negative regulation by host of viral transcription	2/703	2/19	0.131968597140599	0.464213480786825	0.417525554185379	HMGA2/INPP5K	2	19	703	20973	19/20973
	GO:0045618	positive regulation of keratinocyte differentiation	2/703	2/19	0.131968597140599	0.464213480786825	0.417525554185379	NME2/MACROH2A2	2	19	703	20973	19/20973
	GO:0060438	trachea development	2/703	2/19	0.131968597140599	0.464213480786825	0.417525554185379	MAPK1/CTNNB1	2	19	703	20973	19/20973
	GO:0061323	cell proliferation involved in heart morphogenesis	2/703	2/19	0.131968597140599	0.464213480786825	0.417525554185379	TBX5/CTNNB1	2	19	703	20973	19/20973
	GO:0072074	kidney mesenchyme development	2/703	2/19	0.131968597140599	0.464213480786825	0.417525554185379	AMER1/PAX2	2	19	703	20973	19/20973
	GO:1904355	positive regulation of telomere capping	2/703	2/19	0.131968597140599	0.464213480786825	0.417525554185379	MAPK1/AURKB	2	19	703	20973	19/20973
	GO:2001135	regulation of endocytic recycling	2/703	2/19	0.131968597140599	0.464213480786825	0.417525554185379	INPP5F/AKAP5	2	19	703	20973	19/20973
	GO:0010720	positive regulation of cell development	15/703	15/324	0.130501372583709	0.464213480786825	0.417525554185379	CDKL5/NRP1/DOCK1/MAPT/SHTN1/LIMS1/ILK/NIBAN2/ITPKA/NEDD9/PAFAH1B1/OBSL1/CTNNB1/C1QBP/CRABP2	15	324	703	20973	324/20973
	GO:0048872	homeostasis of number of cells	15/703	15/324	0.130501372583709	0.464213480786825	0.417525554185379	ANXA1/DOCK11/TRIM58/STAT3/HCLS1/OCIAD2/G6PD/MIF/TGFBR3/ABCB10/OCIAD1/CRISPLD1/SLC7A11/CDH2/FAS	15	324	703	20973	324/20973
	GO:0007548	sex differentiation	14/703	14/298	0.129392857101065	0.464213480786825	0.417525554185379	PLEKHA1/NUDT1/ARRB2/RHOBTB3/FNDC3A/SGPL1/ROR2/CNTFR/BMPR1A/CTNNA1/CTNNB1/SDC1/GJA1/CCND1	14	298	703	20973	298/20973
	GO:0098656	anion transmembrane transport	13/703	13/273	0.130305495711359	0.464213480786825	0.417525554185379	GABRA5/PRAF2/SLC38A5/SLC7A3/SLC25A22/SLC25A32/XPR1/SLC43A2/SLC25A11/SLC7A11/SLC12A7/SLC43A1/GJA1	13	273	703	20973	273/20973
	GO:1901215	negative regulation of neuron death	13/703	13/273	0.130305495711359	0.464213480786825	0.417525554185379	GABRA5/INPP5A/NRP1/GCLC/STAMBP/ARRB2/CNTFR/MAP2K4/CRLF1/PCDHGC3/SLC7A11/CTNNB1/APOE	13	273	703	20973	273/20973
	GO:0003230	cardiac atrium development	3/703	3/38	0.133862225791396	0.465628006844028	0.418797815333294	ANK2/TBX5/CCN1	3	38	703	20973	38/20973
	GO:0007094	mitotic spindle assembly checkpoint signaling	3/703	3/38	0.133862225791396	0.465628006844028	0.418797815333294	BUB1B/BUB1/AURKB	3	38	703	20973	38/20973
	GO:0010837	regulation of keratinocyte proliferation	3/703	3/38	0.133862225791396	0.465628006844028	0.418797815333294	SFN/SRSF6/EPPK1	3	38	703	20973	38/20973
	GO:0014741	negative regulation of muscle hypertrophy	3/703	3/38	0.133862225791396	0.465628006844028	0.418797815333294	GLRX3/LMNA/G6PD	3	38	703	20973	38/20973
	GO:0033363	secretory granule organization	3/703	3/38	0.133862225791396	0.465628006844028	0.418797815333294	ABCA1/PAFAH1B1/ZNF385A	3	38	703	20973	38/20973
	GO:0043403	skeletal muscle tissue regeneration	3/703	3/38	0.133862225791396	0.465628006844028	0.418797815333294	ANXA1/CD9/GJA1	3	38	703	20973	38/20973
	GO:0048821	erythrocyte development	3/703	3/38	0.133862225791396	0.465628006844028	0.418797815333294	TRIM58/G6PD/ABCB10	3	38	703	20973	38/20973
	GO:0060416	response to growth hormone	3/703	3/38	0.133862225791396	0.465628006844028	0.418797815333294	ASS1/CPS1/STAT3	3	38	703	20973	38/20973
	GO:0071173	spindle assembly checkpoint signaling	3/703	3/38	0.133862225791396	0.465628006844028	0.418797815333294	BUB1B/BUB1/AURKB	3	38	703	20973	38/20973
	GO:0071174	mitotic spindle checkpoint signaling	3/703	3/38	0.133862225791396	0.465628006844028	0.418797815333294	BUB1B/BUB1/AURKB	3	38	703	20973	38/20973
	GO:0072529	pyrimidine-containing compound catabolic process	3/703	3/38	0.133862225791396	0.465628006844028	0.418797815333294	TYMP/DCTPP1/ENTPD7	3	38	703	20973	38/20973
	GO:1901797	negative regulation of signal transduction by p53 class mediator	3/703	3/38	0.133862225791396	0.465628006844028	0.418797815333294	CD44/MIF/ZNF385A	3	38	703	20973	38/20973
	GO:0007517	muscle organ development	16/703	16/351	0.133454506086162	0.465628006844028	0.418797815333294	ASS1/PLEC/ID3/NIBAN2/TGFBR3/PKP2/MYLK/JPH1/MYL6B/CNTFR/BMPR1A/MYORG/CTNNB1/CAV1/TAGLN/GJA1	16	351	703	20973	351/20973
	GO:0048193	Golgi vesicle transport	15/703	15/325	0.132856303993742	0.465628006844028	0.418797815333294	SEC23IP/VTI1A/SNX12/CORO7/TRAPPC1/CSK/VAMP3/KIF1C/STXBP6/STEAP2/ANKFY1/KRT18/PLPP3/RABEP1/LLGL1	15	325	703	20973	325/20973
	GO:0140014	mitotic nuclear division	15/703	15/325	0.132856303993742	0.465628006844028	0.418797815333294	BCCIP/ABRAXAS2/UBE2S/FBXO5/CHMP1A/CDCA5/BUB1B/SLF2/KIF11/TOM1L2/KIF20B/BUB1/HASPIN/OBSL1/AURKB	15	325	703	20973	325/20973
	GO:0051092	positive regulation of NF-kappaB transcription factor activity	10/703	10/199	0.133031034106513	0.465628006844028	0.418797815333294	MYD88/TRIM38/RPS6KA5/TRIM21/STAT3/PRDX3/PPIA/CLU/S100A9/CAV1	10	199	703	20973	199/20973
	GO:0030010	establishment of cell polarity	8/703	8/151	0.135541584693821	0.467901079605476	0.420842275487313	FERMT1/MSN/SHTN1/AMOT/KIF20B/PAFAH1B1/LLGL1/GJA1	8	151	703	20973	151/20973
	GO:0030278	regulation of ossification	7/703	7/127	0.134987332735579	0.467901079605476	0.420842275487313	MAPK1/BMPR1A/LRP4/ENPP1/CCN1/RFLNB/GJA1	7	127	703	20973	127/20973
	GO:0021675	nerve development	5/703	5/81	0.135639792446192	0.467901079605476	0.420842275487313	GABRA5/NRP1/ILK/PAX2/CTNNB1	5	81	703	20973	81/20973
	GO:0072088	nephron epithelium morphogenesis	5/703	5/81	0.135639792446192	0.467901079605476	0.420842275487313	ILK/DCHS1/PAX2/LZTS2/CTNNB1	5	81	703	20973	81/20973
	GO:0080164	regulation of nitric oxide metabolic process	5/703	5/81	0.135639792446192	0.467901079605476	0.420842275487313	KLF4/ASS1/DDAH1/CLU/CAV1	5	81	703	20973	81/20973
	GO:0016925	protein sumoylation	4/703	4/59	0.13544626048394	0.467901079605476	0.420842275487313	PML/MAGEA2/ZMIZ1/CTNNB1	4	59	703	20973	59/20973
	GO:0032210	regulation of telomere maintenance via telomerase	4/703	4/59	0.13544626048394	0.467901079605476	0.420842275487313	MAPK1/SMG6/CTNNB1/AURKB	4	59	703	20973	59/20973
	GO:0048010	vascular endothelial growth factor receptor signaling pathway	4/703	4/59	0.13544626048394	0.467901079605476	0.420842275487313	NRP1/VAV2/NIBAN2/EPN2	4	59	703	20973	59/20973
	GO:0060135	maternal process involved in female pregnancy	4/703	4/59	0.13544626048394	0.467901079605476	0.420842275487313	HMX3/PRDX3/BSG/ADCY7	4	59	703	20973	59/20973
	GO:0090175	regulation of establishment of planar polarity	4/703	4/59	0.13544626048394	0.467901079605476	0.420842275487313	ROR2/DVL2/DAAM1/CELSR1	4	59	703	20973	59/20973
	GO:0048608	reproductive structure development	20/703	20/456	0.134981209059878	0.467901079605476	0.420842275487313	ANXA1/FOXA1/PLEKHA1/PRDX3/MAPK1/NUDT1/BSG/ARRB2/RHOBTB3/FNDC3A/SGPL1/ROR2/CTNNA1/CCN1/CTNNB1/SDC1/GJA1/CCND1/SPINT2/KRT19	20	456	703	20973	456/20973
	GO:0090305	nucleic acid phosphodiester bond hydrolysis	13/703	13/275	0.135482232511076	0.467901079605476	0.420842275487313	ERI2/TUT1/FIP1L1/NUDT12/HMGA2/TBL3/MGME1/EXD2/TSR1/ELAC2/ENPP1/SMG6/PLD3	13	275	703	20973	275/20973
	GO:0090501	RNA phosphodiester bond hydrolysis	9/703	9/176	0.138058424459946	0.475588951138062	0.427756945041304	ERI2/TUT1/FIP1L1/NUDT12/TBL3/EXD2/TSR1/ELAC2/SMG6	9	176	703	20973	176/20973
	GO:0030336	negative regulation of cell migration	17/703	17/379	0.138154067687953	0.475588951138062	0.427756945041304	KLF4/ARHGAP4/DDT/STAT3/MIF/TBX5/PTPRU/THY1/THBS1/BMPR1A/EPPK1/MCC/LIMCH1/APOE/GJA1/CLDN3/ARPIN	17	379	703	20973	379/20973
	GO:0001649	osteoblast differentiation	13/703	13/276	0.138112709757693	0.475588951138062	0.427756945041304	ID3/ILK/FBXO5/EPHA2/SCUBE3/ALPL/BMPR1A/CCN1/MRC2/CTNNB1/MYBBP1A/GJA1/IFT80	13	276	703	20973	276/20973
	GO:0001837	epithelial to mesenchymal transition	9/703	9/177	0.141433804121121	0.47700358272385	0.429029301104344	PDPN/FOXA1/TBX5/HMGA2/TGFBR3/PHLDB1/NOLC1/CTNNB1/RFLNB	9	177	703	20973	177/20973
	GO:0061025	membrane fusion	9/703	9/177	0.141433804121121	0.47700358272385	0.429029301104344	ANXA1/CD9/VTI1A/VAMP3/MFN1/STX8/STXBP6/ANKFY1/RABEP1	9	177	703	20973	177/20973
	GO:0007093	mitotic cell cycle checkpoint signaling	8/703	8/152	0.139164301351108	0.47700358272385	0.429029301104344	PML/HMGA2/UIMC1/BUB1B/BUB1/TP53/AURKB/CCND1	8	152	703	20973	152/20973
	GO:0015908	fatty acid transport	6/703	6/105	0.141075027258577	0.47700358272385	0.429029301104344	ANXA1/RBP1/MIF/THBS1/APOE/CRABP2	6	105	703	20973	105/20973
	GO:0061097	regulation of protein tyrosine kinase activity	6/703	6/105	0.141075027258577	0.47700358272385	0.429029301104344	IBTK/THY1/SRCIN1/DVL2/NEDD9/CAV1	6	105	703	20973	105/20973
	GO:0062014	negative regulation of small molecule metabolic process	6/703	6/105	0.141075027258577	0.47700358272385	0.429029301104344	STAT3/ERLIN1/TP53/APOE/ACADVL/ACADL	6	105	703	20973	105/20973
	GO:0051279	regulation of release of sequestered calcium ion into cytosol	5/703	5/82	0.140737000786899	0.47700358272385	0.429029301104344	ANK2/GSTM2/CALM1/THY1/JPH1	5	82	703	20973	82/20973
	GO:0070227	lymphocyte apoptotic process	5/703	5/82	0.140737000786899	0.47700358272385	0.429029301104344	MIF/TP53/FAS/AURKB/ARG2	5	82	703	20973	82/20973
	GO:1901616	organic hydroxy compound catabolic process	5/703	5/82	0.140737000786899	0.47700358272385	0.429029301104344	INPP5A/SORD/APOE/INPP5K/ALDH2	5	82	703	20973	82/20973
	GO:0006998	nuclear envelope organization	4/703	4/60	0.141526908727776	0.47700358272385	0.429029301104344	LMNA/CHMP1A/TOR1A/PAFAH1B1	4	60	703	20973	60/20973
	GO:0014002	astrocyte development	4/703	4/60	0.141526908727776	0.47700358272385	0.429029301104344	MAPT/LAMB2/ROR2/S100A9	4	60	703	20973	60/20973
	GO:0030071	regulation of mitotic metaphase/anaphase transition	4/703	4/60	0.141526908727776	0.47700358272385	0.429029301104344	FBXO5/BUB1B/BUB1/AURKB	4	60	703	20973	60/20973
	GO:0031641	regulation of myelination	4/703	4/60	0.141526908727776	0.47700358272385	0.429029301104344	RNF10/TYMP/JAM2/CTNNB1	4	60	703	20973	60/20973
	GO:0035196	production of miRNAs involved in gene silencing by miRNA	4/703	4/60	0.141526908727776	0.47700358272385	0.429029301104344	STAT3/PUS10/TP53/LIN28A	4	60	703	20973	60/20973
	GO:0036230	granulocyte activation	4/703	4/60	0.141526908727776	0.47700358272385	0.429029301104344	MYD88/ANXA3/ANXA1/F2RL1	4	60	703	20973	60/20973
	GO:1904407	positive regulation of nitric oxide metabolic process	4/703	4/60	0.141526908727776	0.47700358272385	0.429029301104344	KLF4/ASS1/DDAH1/CLU	4	60	703	20973	60/20973
	GO:0003161	cardiac conduction system development	3/703	3/39	0.141620883519413	0.47700358272385	0.429029301104344	TBX5/BMPR1A/GJA1	3	39	703	20973	39/20973
	GO:0010922	positive regulation of phosphatase activity	3/703	3/39	0.141620883519413	0.47700358272385	0.429029301104344	CALM1/ITGA1/ITGA2	3	39	703	20973	39/20973
	GO:0014037	Schwann cell differentiation	3/703	3/39	0.141620883519413	0.47700358272385	0.429029301104344	LAMB2/PLEC/ILK	3	39	703	20973	39/20973
	GO:0014808	release of sequestered calcium ion into cytosol by sarcoplasmic reticulum	3/703	3/39	0.141620883519413	0.47700358272385	0.429029301104344	ANK2/GSTM2/CALM1	3	39	703	20973	39/20973
	GO:0031577	spindle checkpoint signaling	3/703	3/39	0.141620883519413	0.47700358272385	0.429029301104344	BUB1B/BUB1/AURKB	3	39	703	20973	39/20973
	GO:0032717	negative regulation of interleukin-8 production	3/703	3/39	0.141620883519413	0.47700358272385	0.429029301104344	ANXA1/KLF4/ARRB1	3	39	703	20973	39/20973
	GO:0032965	regulation of collagen biosynthetic process	3/703	3/39	0.141620883519413	0.47700358272385	0.429029301104344	ARRB2/ITGA2/CCN2	3	39	703	20973	39/20973
	GO:0039694	viral RNA genome replication	3/703	3/39	0.141620883519413	0.47700358272385	0.429029301104344	RESF1/HMGA2/INPP5K	3	39	703	20973	39/20973
	GO:0045616	regulation of keratinocyte differentiation	3/703	3/39	0.141620883519413	0.47700358272385	0.429029301104344	NME2/SRSF6/MACROH2A2	3	39	703	20973	39/20973
	GO:0051294	establishment of spindle orientation	3/703	3/39	0.141620883519413	0.47700358272385	0.429029301104344	PAFAH1B1/LLGL1/GJA1	3	39	703	20973	39/20973
	GO:0070306	lens fiber cell differentiation	3/703	3/39	0.141620883519413	0.47700358272385	0.429029301104344	EPHA2/TMOD1/SLC7A11	3	39	703	20973	39/20973
	GO:1905332	positive regulation of morphogenesis of an epithelium	3/703	3/39	0.141620883519413	0.47700358272385	0.429029301104344	PAX2/CTNNB1/GJA1	3	39	703	20973	39/20973
	GO:2000758	positive regulation of peptidyl-lysine acetylation	3/703	3/39	0.141620883519413	0.47700358272385	0.429029301104344	RPS6KA5/PML/ARRB1	3	39	703	20973	39/20973
	GO:0061458	reproductive system development	20/703	20/459	0.141081385691678	0.47700358272385	0.429029301104344	ANXA1/FOXA1/PLEKHA1/PRDX3/MAPK1/NUDT1/BSG/ARRB2/RHOBTB3/FNDC3A/SGPL1/ROR2/CTNNA1/CCN1/CTNNB1/SDC1/GJA1/CCND1/SPINT2/KRT19	20	459	703	20973	459/20973
	GO:0060562	epithelial tube morphogenesis	17/703	17/380	0.140406583293657	0.47700358272385	0.429029301104344	PML/NRP1/FOXA1/ILK/DCHS1/SALL4/PAX2/EPHA2/SDC4/DVL2/KIF20B/LZTS2/CTNNB1/PODXL/GJA1/CELSR1/SPINT2	17	380	703	20973	380/20973
	GO:1901654	response to ketone	10/703	10/201	0.139241039768793	0.47700358272385	0.429029301104344	NQO1/ASS1/CPS1/MSN/TGFBR3/THBS1/SREBF1/CAV1/CCND1/UCP1	10	201	703	20973	201/20973
	GO:0010523	negative regulation of calcium ion transport into cytosol	2/703	2/20	0.143525965217093	0.479219382526322	0.431022248484768	GSTM2/CALM1	2	20	703	20973	20/20973
	GO:0010801	negative regulation of peptidyl-threonine phosphorylation	2/703	2/20	0.143525965217093	0.479219382526322	0.431022248484768	CALM1/INPP5K	2	20	703	20973	20/20973
	GO:0010885	regulation of cholesterol storage	2/703	2/20	0.143525965217093	0.479219382526322	0.431022248484768	ABCA1/CES1	2	20	703	20973	20/20973
	GO:0019896	axonal transport of mitochondrion	2/703	2/20	0.143525965217093	0.479219382526322	0.431022248484768	MAPT/HSBP1	2	20	703	20973	20/20973
	GO:0035729	cellular response to hepatocyte growth factor stimulus	2/703	2/20	0.143525965217093	0.479219382526322	0.431022248484768	NRP1/GCLC	2	20	703	20973	20/20973
	GO:0048025	negative regulation of mRNA splicing, via spliceosome	2/703	2/20	0.143525965217093	0.479219382526322	0.431022248484768	SRSF6/C1QBP	2	20	703	20973	20/20973
	GO:0070314	G1 to G0 transition	2/703	2/20	0.143525965217093	0.479219382526322	0.431022248484768	TP53/MYBBP1A	2	20	703	20973	20/20973
	GO:0071545	inositol phosphate catabolic process	2/703	2/20	0.143525965217093	0.479219382526322	0.431022248484768	INPP5A/INPP5K	2	20	703	20973	20/20973
	GO:0072283	metanephric renal vesicle morphogenesis	2/703	2/20	0.143525965217093	0.479219382526322	0.431022248484768	PAX2/CTNNB1	2	20	703	20973	20/20973
	GO:1903204	negative regulation of oxidative stress-induced neuron death	2/703	2/20	0.143525965217093	0.479219382526322	0.431022248484768	SLC7A11/CTNNB1	2	20	703	20973	20/20973
	GO:1904294	positive regulation of ERAD pathway	2/703	2/20	0.143525965217093	0.479219382526322	0.431022248484768	BAG6/CAV1	2	20	703	20973	20/20973
	GO:1990182	exosomal secretion	2/703	2/20	0.143525965217093	0.479219382526322	0.431022248484768	SDC4/SDC1	2	20	703	20973	20/20973
	GO:2000049	positive regulation of cell-cell adhesion mediated by cadherin	2/703	2/20	0.143525965217093	0.479219382526322	0.431022248484768	FOXA1/PTPRU	2	20	703	20973	20/20973
	GO:0006633	fatty acid biosynthetic process	9/703	9/178	0.144850990375921	0.482997795011833	0.434420649936358	ANXA1/GSTM2/CBR1/MIF/MLYCD/SCD/ERLIN1/ACADVL/ACADL	9	178	703	20973	178/20973
	GO:0006665	sphingolipid metabolic process	9/703	9/178	0.144850990375921	0.482997795011833	0.434420649936358	UGT8/ABCA2/AGK/B4GALT4/SGPL1/CERK/CCN1/PLPP3/CLN6	9	178	703	20973	178/20973
	GO:0018209	peptidyl-serine modification	16/703	16/356	0.14513574805696	0.483624457334566	0.434984286160672	INPP5F/RPS6KA5/PLCL2/CD44/HCLS1/MAPK1/TXN/ILK/MIF/HMGA2/ARRB2/TNKS1BP1/CAV1/GALNT16/AURKB/INPP5K	16	356	703	20973	356/20973
	GO:0071902	positive regulation of protein serine/threonine kinase activity	11/703	11/228	0.145462766246667	0.484391011601401	0.435673744800543	CALM1/CSK/MIF/CKS1B/HMGA2/ROR2/DVL2/THBS1/BMPR1A/CCND2/CCND1	11	228	703	20973	228/20973
	GO:0006835	dicarboxylic acid transport	6/703	6/106	0.145601885776383	0.484531258796158	0.435799886737686	PRAF2/SLC25A22/SLC25A32/SLC25A11/SLC7A11/GJA1	6	106	703	20973	106/20973
	GO:0034605	cellular response to heat	5/703	5/83	0.145916565350931	0.484609869632911	0.435870591347824	BAG3/MAPT/HSBP1/YWHAE/THBS1	5	83	703	20973	83/20973
	GO:0061333	renal tubule morphogenesis	5/703	5/83	0.145916565350931	0.484609869632911	0.435870591347824	ILK/DCHS1/PAX2/LZTS2/CTNNB1	5	83	703	20973	83/20973
	GO:0070830	bicellular tight junction assembly	5/703	5/83	0.145916565350931	0.484609869632911	0.435870591347824	CLDN11/EPHA2/MYO1C/CLDN3/CLDN6	5	83	703	20973	83/20973
	GO:0072006	nephron development	8/703	8/154	0.146553574297434	0.486402062203112	0.437482535479244	LAMB2/ILK/DCHS1/PAX2/PROM1/LZTS2/CTNNB1/PODXL	8	154	703	20973	154/20973
	GO:0033209	tumor necrosis factor-mediated signaling pathway	7/703	7/130	0.147061382984523	0.487439686800062	0.438415801751786	LIMS1/ILK/TXNDC17/KRT18/TP53/FAS/F2RL1	7	130	703	20973	130/20973
	GO:0090100	positive regulation of transmembrane receptor protein serine/threonine kinase signaling pathway	7/703	7/130	0.147061382984523	0.487439686800062	0.438415801751786	FERMT1/ILK/TGFBR3/SCUBE3/THBS1/BMPR1A/CCN1	7	130	703	20973	130/20973
	GO:0043525	positive regulation of neuron apoptotic process	4/703	4/61	0.147713653492474	0.488628939864177	0.439485446570846	NQO1/ITGA1/CTNNB1/TP53	4	61	703	20973	61/20973
	GO:0045604	regulation of epidermal cell differentiation	4/703	4/61	0.147713653492474	0.488628939864177	0.439485446570846	SFN/NME2/SRSF6/MACROH2A2	4	61	703	20973	61/20973
	GO:0050891	multicellular organismal water homeostasis	4/703	4/61	0.147713653492474	0.488628939864177	0.439485446570846	SFN/PLEC/HRNR/INPP5K	4	61	703	20973	61/20973
	GO:0050657	nucleic acid transport	9/703	9/179	0.148309575511368	0.489304048665314	0.440092656804923	NXF2/SNUPN/PEG10/RFTN1/ALKBH5/NCBP3/SMG6/HNRNPA3/MYO1C	9	179	703	20973	179/20973
	GO:0050658	RNA transport	9/703	9/179	0.148309575511368	0.489304048665314	0.440092656804923	NXF2/SNUPN/PEG10/RFTN1/ALKBH5/NCBP3/SMG6/HNRNPA3/MYO1C	9	179	703	20973	179/20973
	GO:0071772	response to BMP	9/703	9/179	0.148309575511368	0.489304048665314	0.440092656804923	ILK/TGFBR3/COL2A1/SCUBE3/ROR2/BMPR1A/CCN1/FAM83G/SPINT2	9	179	703	20973	179/20973
	GO:0071773	cellular response to BMP stimulus	9/703	9/179	0.148309575511368	0.489304048665314	0.440092656804923	ILK/TGFBR3/COL2A1/SCUBE3/ROR2/BMPR1A/CCN1/FAM83G/SPINT2	9	179	703	20973	179/20973
	GO:0003382	epithelial cell morphogenesis	3/703	3/40	0.149525467215249	0.491687450420701	0.442236349696129	COL18A1/CLDN3/SPINT2	3	40	703	20973	40/20973
	GO:0014904	myotube cell development	3/703	3/40	0.149525467215249	0.491687450420701	0.442236349696129	PLEC/NIBAN2/MYORG	3	40	703	20973	40/20973
	GO:0032570	response to progesterone	3/703	3/40	0.149525467215249	0.491687450420701	0.442236349696129	THBS1/SREBF1/CAV1	3	40	703	20973	40/20973
	GO:0051281	positive regulation of release of sequestered calcium ion into cytosol	3/703	3/40	0.149525467215249	0.491687450420701	0.442236349696129	GSTM2/CALM1/THY1	3	40	703	20973	40/20973
	GO:1903514	release of sequestered calcium ion into cytosol by endoplasmic reticulum	3/703	3/40	0.149525467215249	0.491687450420701	0.442236349696129	ANK2/GSTM2/CALM1	3	40	703	20973	40/20973
	GO:0010631	epithelial cell migration	17/703	17/384	0.149622607535429	0.491687450420701	0.442236349696129	ANXA3/LGALS8/ANXA1/KLF4/FERMT1/NRP1/DOCK1/AMOT/EPHA2/MAP2K3/SPARC/THBS1/ITGA2/EPPK1/MCC/PLPP3/APOE	17	384	703	20973	384/20973
	GO:0035282	segmentation	6/703	6/107	0.15019415451481	0.492593435194666	0.443051215723267	ALDH1A2/NRP1/ROR2/DVL2/BMPR1A/TP53	6	107	703	20973	107/20973
	GO:0071103	DNA conformation change	6/703	6/107	0.15019415451481	0.492593435194666	0.443051215723267	ANXA1/CHD3/SUPV3L1/HMGA1/TOP3A/TWNK	6	107	703	20973	107/20973
	GO:1904063	negative regulation of cation transmembrane transport	6/703	6/107	0.15019415451481	0.492593435194666	0.443051215723267	GSTM2/CALM1/SLC43A2/YWHAE/CAV1/SLC43A1	6	107	703	20973	107/20973
	GO:0001508	action potential	8/703	8/155	0.150319028816403	0.492679494053761	0.443128619276424	ANK2/CALM1/PKP2/CXADR/YWHAE/DSC2/CAV1/GJA1	8	155	703	20973	155/20973
	GO:2001022	positive regulation of response to DNA damage stimulus	7/703	7/131	0.151196298529264	0.494257533477537	0.444547948555319	MGMT/HMGA2/UIMC1/WRAP53/SLF2/FXR2/ZNF385A	7	131	703	20973	131/20973
	GO:0021954	central nervous system neuron development	5/703	5/84	0.151176558150577	0.494257533477537	0.444547948555319	NRP1/MAPT/HPRT1/ZMIZ1/PAFAH1B1	5	84	703	20973	84/20973
	GO:0070828	heterochromatin organization	5/703	5/84	0.151176558150577	0.494257533477537	0.444547948555319	RESF1/HMGA2/ZDBF2/CENPV/NDN	5	84	703	20973	84/20973
	GO:0072028	nephron morphogenesis	5/703	5/84	0.151176558150577	0.494257533477537	0.444547948555319	ILK/DCHS1/PAX2/LZTS2/CTNNB1	5	84	703	20973	84/20973
	GO:0048754	branching morphogenesis of an epithelial tube	9/703	9/181	0.155349228983877	0.496461547520453	0.446530295520214	PML/NRP1/FOXA1/ILK/DCHS1/PAX2/EPHA2/CTNNB1/CELSR1	9	181	703	20973	181/20973
	GO:0060840	artery development	6/703	6/108	0.154850616521597	0.496461547520453	0.446530295520214	HPGD/NRP1/ZMIZ1/MYLK/BMPR1A/APOE	6	108	703	20973	108/20973
	GO:0001658	branching involved in ureteric bud morphogenesis	4/703	4/62	0.154002909115099	0.496461547520453	0.446530295520214	ILK/DCHS1/PAX2/CTNNB1	4	62	703	20973	62/20973
	GO:0007091	metaphase/anaphase transition of mitotic cell cycle	4/703	4/62	0.154002909115099	0.496461547520453	0.446530295520214	FBXO5/BUB1B/BUB1/AURKB	4	62	703	20973	62/20973
	GO:0031122	cytoplasmic microtubule organization	4/703	4/62	0.154002909115099	0.496461547520453	0.446530295520214	MAPT/TUBGCP2/PAFAH1B1/HOOK1	4	62	703	20973	62/20973
	GO:0032206	positive regulation of telomere maintenance	4/703	4/62	0.154002909115099	0.496461547520453	0.446530295520214	PML/MAPK1/CTNNB1/AURKB	4	62	703	20973	62/20973
	GO:1904589	regulation of protein import	4/703	4/62	0.154002909115099	0.496461547520453	0.446530295520214	FERMT1/BAG3/HCLS1/NOLC1	4	62	703	20973	62/20973
	GO:0000963	mitochondrial RNA processing	2/703	2/21	0.155284603888865	0.496461547520453	0.446530295520214	SUPV3L1/ELAC2	2	21	703	20973	21/20973
	GO:0007097	nuclear migration	2/703	2/21	0.155284603888865	0.496461547520453	0.446530295520214	TRIM58/PAFAH1B1	2	21	703	20973	21/20973
	GO:0009070	serine family amino acid biosynthetic process	2/703	2/21	0.155284603888865	0.496461547520453	0.446530295520214	GGT1/SHMT1	2	21	703	20973	21/20973
	GO:0010738	regulation of protein kinase A signaling	2/703	2/21	0.155284603888865	0.496461547520453	0.446530295520214	MIF/AKAP5	2	21	703	20973	21/20973
	GO:0021756	striatum development	2/703	2/21	0.155284603888865	0.496461547520453	0.446530295520214	HPRT1/SLC7A11	2	21	703	20973	21/20973
	GO:0030150	protein import into mitochondrial matrix	2/703	2/21	0.155284603888865	0.496461547520453	0.446530295520214	GRPEL2/TIMM21	2	21	703	20973	21/20973
	GO:0030449	regulation of complement activation	2/703	2/21	0.155284603888865	0.496461547520453	0.446530295520214	CD55/C1QBP	2	21	703	20973	21/20973
	GO:0031998	regulation of fatty acid beta-oxidation	2/703	2/21	0.155284603888865	0.496461547520453	0.446530295520214	MLYCD/TYSND1	2	21	703	20973	21/20973
	GO:0032930	positive regulation of superoxide anion generation	2/703	2/21	0.155284603888865	0.496461547520453	0.446530295520214	MAPT/F2RL1	2	21	703	20973	21/20973
	GO:0034501	protein localization to kinetochore	2/703	2/21	0.155284603888865	0.496461547520453	0.446530295520214	HASPIN/AURKB	2	21	703	20973	21/20973
	GO:0044241	lipid digestion	2/703	2/21	0.155284603888865	0.496461547520453	0.446530295520214	AKR1C1/LIMA1	2	21	703	20973	21/20973
	GO:0045063	T-helper 1 cell differentiation	2/703	2/21	0.155284603888865	0.496461547520453	0.446530295520214	ANXA1/CRACR2A	2	21	703	20973	21/20973
	GO:0046485	ether lipid metabolic process	2/703	2/21	0.155284603888865	0.496461547520453	0.446530295520214	PAFAH1B1/DHRS7B	2	21	703	20973	21/20973
	GO:0046716	muscle cell cellular homeostasis	2/703	2/21	0.155284603888865	0.496461547520453	0.446530295520214	BAG3/PFKM	2	21	703	20973	21/20973
	GO:0060716	labyrinthine layer blood vessel development	2/703	2/21	0.155284603888865	0.496461547520453	0.446530295520214	MAPK1/CCN1	2	21	703	20973	21/20973
	GO:0060973	cell migration involved in heart development	2/703	2/21	0.155284603888865	0.496461547520453	0.446530295520214	TBX5/DCHS1	2	21	703	20973	21/20973
	GO:0070584	mitochondrion morphogenesis	2/703	2/21	0.155284603888865	0.496461547520453	0.446530295520214	PLEC/SUPV3L1	2	21	703	20973	21/20973
	GO:0086014	atrial cardiac muscle cell action potential	2/703	2/21	0.155284603888865	0.496461547520453	0.446530295520214	ANK2/GJA1	2	21	703	20973	21/20973
	GO:0086026	atrial cardiac muscle cell to AV node cell signaling	2/703	2/21	0.155284603888865	0.496461547520453	0.446530295520214	ANK2/GJA1	2	21	703	20973	21/20973
	GO:0086066	atrial cardiac muscle cell to AV node cell communication	2/703	2/21	0.155284603888865	0.496461547520453	0.446530295520214	ANK2/GJA1	2	21	703	20973	21/20973
	GO:0097062	dendritic spine maintenance	2/703	2/21	0.155284603888865	0.496461547520453	0.446530295520214	ITPKA/APOE	2	21	703	20973	21/20973
	GO:0097734	extracellular exosome biogenesis	2/703	2/21	0.155284603888865	0.496461547520453	0.446530295520214	SDC4/SDC1	2	21	703	20973	21/20973
	GO:0098856	intestinal lipid absorption	2/703	2/21	0.155284603888865	0.496461547520453	0.446530295520214	AKR1C1/LIMA1	2	21	703	20973	21/20973
	GO:1903083	protein localization to condensed chromosome	2/703	2/21	0.155284603888865	0.496461547520453	0.446530295520214	HASPIN/AURKB	2	21	703	20973	21/20973
	GO:0043010	camera-type eye development	16/703	16/359	0.152408011872159	0.496461547520453	0.446530295520214	KLF4/ALDH1A2/NRP1/LAMB2/NHS/PAX2/EPHA2/THY1/TMOD1/SHROOM2/NECTIN3/PROM1/OBSL1/SLC7A11/CTNNB1/GJA1	16	359	703	20973	359/20973
	GO:0045229	external encapsulating structure organization	16/703	16/360	0.154875412283362	0.496461547520453	0.446530295520214	FERMT1/PDPN/LAMB2/HRNR/PHLDB1/CTSV/COL2A1/NFKB2/COLGALT2/P4HA1/COL18A1/COL4A6/CCN1/CAV1/CCN2/SPINT2	16	360	703	20973	360/20973
	GO:0018105	peptidyl-serine phosphorylation	15/703	15/333	0.152551782588679	0.496461547520453	0.446530295520214	INPP5F/RPS6KA5/PLCL2/CD44/HCLS1/MAPK1/TXN/ILK/MIF/HMGA2/ARRB2/TNKS1BP1/CAV1/AURKB/INPP5K	15	333	703	20973	333/20973
	GO:0050708	regulation of protein secretion	13/703	13/282	0.154475673811562	0.496461547520453	0.446530295520214	PFKFB2/SERGEF/PFKM/PPIA/GLUD1/MYRIP/SRCIN1/SREBF1/EXPH5/APOE/MYH10/LLGL1/F2RL1	13	282	703	20973	282/20973
	GO:0001654	eye development	18/703	18/413	0.155914270756211	0.497948709991864	0.447867887728839	KLF4/ALDH1A2/NRP1/LAMB2/STAT3/FREM2/NHS/PAX2/EPHA2/THY1/TMOD1/SHROOM2/NECTIN3/PROM1/OBSL1/SLC7A11/CTNNB1/GJA1	18	413	703	20973	413/20973
	GO:0090307	mitotic spindle assembly	5/703	5/85	0.156515001367033	0.49954787976251	0.449306222185637	BCCIP/ABRAXAS2/CHMP1A/KIF11/AURKB	5	85	703	20973	85/20973
	GO:0090132	epithelium migration	17/703	17/387	0.156748452707122	0.49997351294513	0.449689047626535	ANXA3/LGALS8/ANXA1/KLF4/FERMT1/NRP1/DOCK1/AMOT/EPHA2/MAP2K3/SPARC/THBS1/ITGA2/EPPK1/MCC/PLPP3/APOE	17	387	703	20973	387/20973
	GO:0000413	protein peptidyl-prolyl isomerization	3/703	3/41	0.15756784009503	0.500032631051255	0.449742219972975	PIN4/FKBP7/PPIA	3	41	703	20973	41/20973
	GO:0006730	one-carbon metabolic process	3/703	3/41	0.15756784009503	0.500032631051255	0.449742219972975	CA5B/SHMT1/CA8	3	41	703	20973	41/20973
	GO:0007212	dopamine receptor signaling pathway	3/703	3/41	0.15756784009503	0.500032631051255	0.449742219972975	ARRB2/GNAO1/GNAS	3	41	703	20973	41/20973
	GO:0045940	positive regulation of steroid metabolic process	3/703	3/41	0.15756784009503	0.500032631051255	0.449742219972975	CES1/SREBF1/APOE	3	41	703	20973	41/20973
	GO:0060421	positive regulation of heart growth	3/703	3/41	0.15756784009503	0.500032631051255	0.449742219972975	TBX5/TGFBR3/BMPR1A	3	41	703	20973	41/20973
	GO:0071470	cellular response to osmotic stress	3/703	3/41	0.15756784009503	0.500032631051255	0.449742219972975	SERPINB6/MYLK/MICU1	3	41	703	20973	41/20973
	GO:0071985	multivesicular body sorting pathway	3/703	3/41	0.15756784009503	0.500032631051255	0.449742219972975	DENND10/CHMP1A/EXPH5	3	41	703	20973	41/20973
	GO:1904358	positive regulation of telomere maintenance via telomere lengthening	3/703	3/41	0.15756784009503	0.500032631051255	0.449742219972975	MAPK1/CTNNB1/AURKB	3	41	703	20973	41/20973
	GO:0046034	ATP metabolic process	14/703	14/309	0.157716417819347	0.500186353655644	0.449880482040417	AK4/PFKFB2/PGK1/STAT3/PFKM/NUDT2/NADK/PGAM1/COA6/ENO3/GHITM/ENPP1/TP53/COX15	14	309	703	20973	309/20973
	GO:0048705	skeletal system morphogenesis	11/703	11/232	0.157816887233397	0.500187405920568	0.449881428474577	PLEKHA1/SGPL1/COL2A1/ROR2/HOXB9/SLC39A1/ALPL/CTNNB1/CCN2/RFLNB/IFT80	11	232	703	20973	232/20973
	GO:0010634	positive regulation of epithelial cell migration	9/703	9/182	0.158929400318166	0.503075002908264	0.452478607536478	ANXA3/ANXA1/NRP1/DOCK1/MAP2K3/SPARC/THBS1/ITGA2/PLPP3	9	182	703	20973	182/20973
	GO:0051236	establishment of RNA localization	9/703	9/182	0.158929400318166	0.503075002908264	0.452478607536478	NXF2/SNUPN/PEG10/RFTN1/ALKBH5/NCBP3/SMG6/HNRNPA3/MYO1C	9	182	703	20973	182/20973
	GO:0006690	icosanoid metabolic process	7/703	7/133	0.159626577913802	0.504642251062937	0.453888230870158	ANXA1/HPGD/AKR1C1/PTGR1/CBR1/MIF/GGT1	7	133	703	20973	133/20973
	GO:0010389	regulation of G2/M transition of mitotic cell cycle	6/703	6/109	0.159570019238235	0.504642251062937	0.453888230870158	FBXO5/HMGA2/UIMC1/AURKB/CCND1/HSPA2	6	109	703	20973	109/20973
	GO:0007566	embryo implantation	4/703	4/63	0.160391034210202	0.505459442195557	0.454623233610587	HMX3/BSG/C1QBP/GJA1	4	63	703	20973	63/20973
	GO:0046456	icosanoid biosynthetic process	4/703	4/63	0.160391034210202	0.505459442195557	0.454623233610587	ANXA1/CBR1/MIF/GGT1	4	63	703	20973	63/20973
	GO:0070228	regulation of lymphocyte apoptotic process	4/703	4/63	0.160391034210202	0.505459442195557	0.454623233610587	MIF/TP53/AURKB/ARG2	4	63	703	20973	63/20973
	GO:2000059	negative regulation of ubiquitin-dependent protein catabolic process	4/703	4/63	0.160391034210202	0.505459442195557	0.454623233610587	PML/EIF3H/BAG6/MAP1A	4	63	703	20973	63/20973
	GO:0010951	negative regulation of endopeptidase activity	13/703	13/284	0.160146903758383	0.505459442195557	0.454623233610587	KLF4/SFN/CD44/SERPINB6/IGBP1/PRDX3/SERPINB9/PEBP1/ARRB2/PAX2/TFPI2/THBS1/SPINT2	13	284	703	20973	284/20973
	GO:0032890	regulation of organic acid transport	5/703	5/86	0.161929870868525	0.509344902385568	0.458117916523176	MIF/SLC43A2/SV2A/THBS1/SLC43A1	5	86	703	20973	86/20973
	GO:0055072	iron ion homeostasis	5/703	5/86	0.161929870868525	0.509344902385568	0.458117916523176	GLRX3/ABCB7/SLC39A14/FTH1/STEAP2	5	86	703	20973	86/20973
	GO:0061045	negative regulation of wound healing	5/703	5/86	0.161929870868525	0.509344902385568	0.458117916523176	CD9/THBS1/EPPK1/APOE/CLDN3	5	86	703	20973	86/20973
	GO:0031346	positive regulation of cell projection organization	16/703	16/363	0.16240593890207	0.510520871501473	0.459175613417267	CDKL5/DOCK11/NRP1/MAPT/SHTN1/ROR2/ITPKA/DVL2/ITGA2/VLDLR/PAFAH1B1/OBSL1/S100A9/APOE/F2RL1/CRABP2	16	363	703	20973	363/20973
	GO:0048639	positive regulation of developmental growth	9/703	9/183	0.162549177222504	0.510649773727299	0.459291551397316	CDKL5/NRP1/MAPT/SHTN1/TBX5/TGFBR3/BMPR1A/PAFAH1B1/CRABP2	9	183	703	20973	183/20973
	GO:0070167	regulation of biomineral tissue development	6/703	6/110	0.164351076234608	0.514620555653739	0.462862974875962	FBXO5/BMPR1A/ENPP1/CCN1/RFLNB/GJA1	6	110	703	20973	110/20973
	GO:0110020	regulation of actomyosin structure organization	6/703	6/110	0.164351076234608	0.514620555653739	0.462862974875962	NRP1/CGNL1/SDC4/LIMCH1/INPP5K/CCN2	6	110	703	20973	110/20973
	GO:0051899	membrane depolarization	5/703	5/87	0.167419099687152	0.514620555653739	0.462862974875962	ANK2/GCLC/TBX5/CAV1/GJA1	5	87	703	20973	87/20973
	GO:2000134	negative regulation of G1/S transition of mitotic cell cycle	5/703	5/87	0.167419099687152	0.514620555653739	0.462862974875962	SLFN11/KLF4/PML/TP53/CCND1	5	87	703	20973	87/20973
	GO:0070918	primary sncRNA processing	4/703	4/64	0.16687433961967	0.514620555653739	0.462862974875962	STAT3/PUS10/TP53/LIN28A	4	64	703	20973	64/20973
	GO:1901799	negative regulation of proteasomal protein catabolic process	4/703	4/64	0.16687433961967	0.514620555653739	0.462862974875962	F8A1/EIF3H/BAG6/MAP1A	4	64	703	20973	64/20973
	GO:1902099	regulation of metaphase/anaphase transition of cell cycle	4/703	4/64	0.16687433961967	0.514620555653739	0.462862974875962	FBXO5/BUB1B/BUB1/AURKB	4	64	703	20973	64/20973
	GO:1903670	regulation of sprouting angiogenesis	4/703	4/64	0.16687433961967	0.514620555653739	0.462862974875962	KLF4/CEMIP2/THBS1/EPN2	4	64	703	20973	64/20973
	GO:0030279	negative regulation of ossification	3/703	3/42	0.165739900064864	0.514620555653739	0.462862974875962	LRP4/ENPP1/RFLNB	3	42	703	20973	42/20973
	GO:0030513	positive regulation of BMP signaling pathway	3/703	3/42	0.165739900064864	0.514620555653739	0.462862974875962	ILK/SCUBE3/CCN1	3	42	703	20973	42/20973
	GO:0060999	positive regulation of dendritic spine development	3/703	3/42	0.165739900064864	0.514620555653739	0.462862974875962	ITPKA/PAFAH1B1/APOE	3	42	703	20973	42/20973
	GO:0072595	maintenance of protein localization in organelle	3/703	3/42	0.165739900064864	0.514620555653739	0.462862974875962	SYNE1/PML/TXN	3	42	703	20973	42/20973
	GO:0099622	cardiac muscle cell membrane repolarization	3/703	3/42	0.165739900064864	0.514620555653739	0.462862974875962	ANK2/YWHAE/GJA1	3	42	703	20973	42/20973
	GO:0002283	neutrophil activation involved in immune response	2/703	2/22	0.167218090015685	0.514620555653739	0.462862974875962	MYD88/ANXA3	2	22	703	20973	22/20973
	GO:0009220	pyrimidine ribonucleotide biosynthetic process	2/703	2/22	0.167218090015685	0.514620555653739	0.462862974875962	UMPS/NME2	2	22	703	20973	22/20973
	GO:0010878	cholesterol storage	2/703	2/22	0.167218090015685	0.514620555653739	0.462862974875962	ABCA1/CES1	2	22	703	20973	22/20973
	GO:0010958	regulation of amino acid import across plasma membrane	2/703	2/22	0.167218090015685	0.514620555653739	0.462862974875962	SLC43A2/SLC43A1	2	22	703	20973	22/20973
	GO:0021884	forebrain neuron development	2/703	2/22	0.167218090015685	0.514620555653739	0.462862974875962	NRP1/ZMIZ1	2	22	703	20973	22/20973
	GO:0031065	positive regulation of histone deacetylation	2/703	2/22	0.167218090015685	0.514620555653739	0.462862974875962	SREBF1/TP53	2	22	703	20973	22/20973
	GO:0034380	high-density lipoprotein particle assembly	2/703	2/22	0.167218090015685	0.514620555653739	0.462862974875962	ABCA1/APOE	2	22	703	20973	22/20973
	GO:0035330	regulation of hippo signaling	2/703	2/22	0.167218090015685	0.514620555653739	0.462862974875962	TIAL1/MAP2K3	2	22	703	20973	22/20973
	GO:0035728	response to hepatocyte growth factor	2/703	2/22	0.167218090015685	0.514620555653739	0.462862974875962	NRP1/GCLC	2	22	703	20973	22/20973
	GO:0042053	regulation of dopamine metabolic process	2/703	2/22	0.167218090015685	0.514620555653739	0.462862974875962	HPRT1/ALDH2	2	22	703	20973	22/20973
	GO:0042069	regulation of catecholamine metabolic process	2/703	2/22	0.167218090015685	0.514620555653739	0.462862974875962	HPRT1/ALDH2	2	22	703	20973	22/20973
	GO:0046823	negative regulation of nucleocytoplasmic transport	2/703	2/22	0.167218090015685	0.514620555653739	0.462862974875962	FERMT1/TXN	2	22	703	20973	22/20973
	GO:0048485	sympathetic nervous system development	2/703	2/22	0.167218090015685	0.514620555653739	0.462862974875962	NRP1/CTNNB1	2	22	703	20973	22/20973
	GO:0051546	keratinocyte migration	2/703	2/22	0.167218090015685	0.514620555653739	0.462862974875962	FERMT1/EPPK1	2	22	703	20973	22/20973
	GO:0060713	labyrinthine layer morphogenesis	2/703	2/22	0.167218090015685	0.514620555653739	0.462862974875962	CCN1/SPINT2	2	22	703	20973	22/20973
	GO:0061003	positive regulation of dendritic spine morphogenesis	2/703	2/22	0.167218090015685	0.514620555653739	0.462862974875962	ITPKA/PAFAH1B1	2	22	703	20973	22/20973
	GO:0072243	metanephric nephron epithelium development	2/703	2/22	0.167218090015685	0.514620555653739	0.462862974875962	LAMB2/PAX2	2	22	703	20973	22/20973
	GO:1903789	regulation of amino acid transmembrane transport	2/703	2/22	0.167218090015685	0.514620555653739	0.462862974875962	SLC43A2/SLC43A1	2	22	703	20973	22/20973
	GO:1905906	regulation of amyloid fibril formation	2/703	2/22	0.167218090015685	0.514620555653739	0.462862974875962	CLU/APOE	2	22	703	20973	22/20973
	GO:2000773	negative regulation of cellular senescence	2/703	2/22	0.167218090015685	0.514620555653739	0.462862974875962	FBXO5/HMGA2	2	22	703	20973	22/20973
	GO:0010959	regulation of metal ion transport	19/703	19/444	0.166313373893564	0.514620555653739	0.462862974875962	PML/ANK2/CRACR2A/GSTM2/CALM1/G6PD/PSEN2/CAMK2G/ARRB2/PKP2/MYLK/THY1/JPH1/YWHAE/CTNNB1/CAV1/INPP5K/CD63/HSPA2	19	444	703	20973	444/20973
	GO:0150063	visual system development	18/703	18/417	0.165338388338735	0.514620555653739	0.462862974875962	KLF4/ALDH1A2/NRP1/LAMB2/STAT3/FREM2/NHS/PAX2/EPHA2/THY1/TMOD1/SHROOM2/NECTIN3/PROM1/OBSL1/SLC7A11/CTNNB1/GJA1	18	417	703	20973	417/20973
	GO:0001708	cell fate specification	6/703	6/111	0.169192468945227	0.517523810398903	0.465474236927984	NRP1/FOXA1/TBX5/PAX2/BMPR1A/CTNNB1	6	111	703	20973	111/20973
	GO:0006090	pyruvate metabolic process	6/703	6/111	0.169192468945227	0.517523810398903	0.465474236927984	PFKFB2/PGK1/STAT3/PFKM/PGAM1/ENO3	6	111	703	20973	111/20973
	GO:0007178	transmembrane receptor protein serine/threonine kinase signaling pathway	17/703	17/392	0.169024145001107	0.517523810398903	0.465474236927984	FERMT1/HPGD/PML/STAT3/ILK/TGFBR3/ARRB2/ZMIZ1/SCUBE3/PEG10/ROR2/THBS1/BMPR1A/CCN1/TP53/CAV1/FAM83G	17	392	703	20973	392/20973
	GO:0090130	tissue migration	17/703	17/392	0.169024145001107	0.517523810398903	0.465474236927984	ANXA3/LGALS8/ANXA1/KLF4/FERMT1/NRP1/DOCK1/AMOT/EPHA2/MAP2K3/SPARC/THBS1/ITGA2/EPPK1/MCC/PLPP3/APOE	17	392	703	20973	392/20973
	GO:1901653	cellular response to peptide	17/703	17/392	0.169024145001107	0.517523810398903	0.465474236927984	ASS1/CPS1/STAT3/APRT/GCLC/CSK/SLC39A14/BAIAP2L1/SREBF1/ENPP1/TP53/CAV1/RARRES2/MYO1C/INPP5K/AGTRAP/GJA1	17	392	703	20973	392/20973
	GO:0010632	regulation of epithelial cell migration	14/703	14/313	0.168764448006512	0.517523810398903	0.465474236927984	ANXA3/ANXA1/KLF4/NRP1/DOCK1/EPHA2/MAP2K3/SPARC/THBS1/ITGA2/EPPK1/MCC/PLPP3/APOE	14	313	703	20973	313/20973
	GO:0000819	sister chromatid segregation	10/703	10/210	0.168996078829295	0.517523810398903	0.465474236927984	MCMBP/FBXO5/CHMP1A/CDCA5/BUB1B/SLF2/BUB1/HASPIN/CTNNB1/AURKB	10	210	703	20973	210/20973
	GO:0042594	response to starvation	10/703	10/210	0.168996078829295	0.517523810398903	0.465474236927984	WDR45/CPS1/MAPK1/TTC5/XPR1/SREBF1/DSC2/TP53/MYBBP1A/FAS	10	210	703	20973	210/20973
	GO:0034470	ncRNA processing	20/703	20/472	0.169296419485039	0.517524856381743	0.465475177711876	TRUB1/ERI2/PIN4/STAT3/PUS10/TUT1/KTI12/UTP11/TBL3/WDR18/RRP12/TSR1/ELAC2/PELP1/GEMIN4/SNU13/NOLC1/TP53/MRM3/LIN28A	20	472	703	20973	472/20973
	GO:0003018	vascular process in circulatory system	13/703	13/288	0.171805432312687	0.524873476698393	0.472084715989409	SLC38A5/SLC7A3/CPS1/ABCA2/GCLC/PLEC/SLC22A5/ITGA1/DDAH1/ATP2A3/CAV1/APOE/F2RL1	13	288	703	20973	288/20973
	GO:0110149	regulation of biomineralization	6/703	6/112	0.174092848404255	0.526707315432619	0.473734117752788	FBXO5/BMPR1A/ENPP1/CCN1/RFLNB/GJA1	6	112	703	20973	112/20973
	GO:0061515	myeloid cell development	5/703	5/88	0.172980581449289	0.526707315432619	0.473734117752788	TRIM58/G6PD/ABCB10/PAFAH1B1/ZNF385A	5	88	703	20973	88/20973
	GO:0010965	regulation of mitotic sister chromatid separation	4/703	4/65	0.173449096077061	0.526707315432619	0.473734117752788	FBXO5/BUB1B/BUB1/AURKB	4	65	703	20973	65/20973
	GO:0032233	positive regulation of actin filament bundle assembly	4/703	4/65	0.173449096077061	0.526707315432619	0.473734117752788	NRP1/SDC4/LIMCH1/CCN2	4	65	703	20973	65/20973
	GO:0032507	maintenance of protein location in cell	4/703	4/65	0.173449096077061	0.526707315432619	0.473734117752788	SYNE1/PML/TXN/CAV1	4	65	703	20973	65/20973
	GO:0034205	amyloid-beta formation	4/703	4/65	0.173449096077061	0.526707315432619	0.473734117752788	ABCA2/PSEN2/CLU/APOE	4	65	703	20973	65/20973
	GO:0051898	negative regulation of protein kinase B signaling	4/703	4/65	0.173449096077061	0.526707315432619	0.473734117752788	PLEKHA1/ARRB2/EPHA2/INPP5K	4	65	703	20973	65/20973
	GO:0060113	inner ear receptor cell differentiation	4/703	4/65	0.173449096077061	0.526707315432619	0.473734117752788	GABRA5/IFT27/SDC4/PAFAH1B1	4	65	703	20973	65/20973
	GO:0090311	regulation of protein deacetylation	4/703	4/65	0.173449096077061	0.526707315432619	0.473734117752788	MAPT/SREBF1/TP53/NDN	4	65	703	20973	65/20973
	GO:0016233	telomere capping	3/703	3/43	0.174033598049297	0.526707315432619	0.473734117752788	MAPK1/SMG6/AURKB	3	43	703	20973	43/20973
	GO:0021799	cerebral cortex radially oriented cell migration	3/703	3/43	0.174033598049297	0.526707315432619	0.473734117752788	ZMIZ1/PAFAH1B1/CTNNB1	3	43	703	20973	43/20973
	GO:0043001	Golgi to plasma membrane protein transport	3/703	3/43	0.174033598049297	0.526707315432619	0.473734117752788	CSK/VAMP3/KRT18	3	43	703	20973	43/20973
	GO:0048854	brain morphogenesis	3/703	3/43	0.174033598049297	0.526707315432619	0.473734117752788	PAX2/PAFAH1B1/CDH2	3	43	703	20973	43/20973
	GO:0051693	actin filament capping	3/703	3/43	0.174033598049297	0.526707315432619	0.473734117752788	ADD3/TMOD1/SPTBN2	3	43	703	20973	43/20973
	GO:0071364	cellular response to epidermal growth factor stimulus	3/703	3/43	0.174033598049297	0.526707315432619	0.473734117752788	PAX2/INPP5K/NCL	3	43	703	20973	43/20973
	GO:0006605	protein targeting	15/703	15/341	0.173725718541341	0.526707315432619	0.473734117752788	BAG3/UBL5/CHM/ZDHHC6/UBE2L3/BAG6/AGK/GRPEL2/TIMM21/ZDHHC18/YWHAE/SREBF1/CLU/MYO1C/INPP5K	15	341	703	20973	341/20973
	GO:0043393	regulation of protein binding	10/703	10/212	0.175993710920887	0.532135947972051	0.478616769600066	PLCL2/TRIM21/NRP1/TGFBR3/ARRB2/ATP2A3/CAV1/APOE/DHRS7B/AURKB	10	212	703	20973	212/20973
	GO:1903531	negative regulation of secretion by cell	8/703	8/162	0.177942445132594	0.532151632760669	0.4786308769027	ANXA1/SERGEF/VAMP3/STXBP6/SRCIN1/SREBF1/APOE/GJA1	8	162	703	20973	162/20973
	GO:0006906	vesicle fusion	6/703	6/113	0.179050836976646	0.532151632760669	0.4786308769027	ANXA1/VTI1A/VAMP3/STX8/STXBP6/ANKFY1	6	113	703	20973	113/20973
	GO:0009791	post-embryonic development	5/703	5/89	0.178612173754792	0.532151632760669	0.4786308769027	KLF4/PLEKHA1/ALDH5A1/SGPL1/NDN	5	89	703	20973	89/20973
	GO:0043903	regulation of biological process involved in symbiotic interaction	5/703	5/89	0.178612173754792	0.532151632760669	0.4786308769027	TRIM38/TRIM21/FUCA2/CAV1/F2RL1	5	89	703	20973	89/20973
	GO:0072384	organelle transport along microtubule	5/703	5/89	0.178612173754792	0.532151632760669	0.4786308769027	MAPT/TRIM58/HSBP1/KIF1C/PAFAH1B1	5	89	703	20973	89/20973
	GO:0120192	tight junction assembly	5/703	5/89	0.178612173754792	0.532151632760669	0.4786308769027	CLDN11/EPHA2/MYO1C/CLDN3/CLDN6	5	89	703	20973	89/20973
	GO:0002053	positive regulation of mesenchymal cell proliferation	2/703	2/23	0.17930154112837	0.532151632760669	0.4786308769027	BMPR1A/CTNNB1	2	23	703	20973	23/20973
	GO:0006268	DNA unwinding involved in DNA replication	2/703	2/23	0.17930154112837	0.532151632760669	0.4786308769027	HMGA1/TWNK	2	23	703	20973	23/20973
	GO:0006670	sphingosine metabolic process	2/703	2/23	0.17930154112837	0.532151632760669	0.4786308769027	ABCA2/PLPP3	2	23	703	20973	23/20973
	GO:0006907	pinocytosis	2/703	2/23	0.17930154112837	0.532151632760669	0.4786308769027	ANKFY1/CAV1	2	23	703	20973	23/20973
	GO:0006925	inflammatory cell apoptotic process	2/703	2/23	0.17930154112837	0.532151632760669	0.4786308769027	ANXA1/SLC7A11	2	23	703	20973	23/20973
	GO:0007413	axonal fasciculation	2/703	2/23	0.17930154112837	0.532151632760669	0.4786308769027	NRP1/NDN	2	23	703	20973	23/20973
	GO:0016137	glycoside metabolic process	2/703	2/23	0.17930154112837	0.532151632760669	0.4786308769027	AKR1C1/FUCA2	2	23	703	20973	23/20973
	GO:0021819	layer formation in cerebral cortex	2/703	2/23	0.17930154112837	0.532151632760669	0.4786308769027	PAFAH1B1/CTNNB1	2	23	703	20973	23/20973
	GO:0032516	positive regulation of phosphoprotein phosphatase activity	2/703	2/23	0.17930154112837	0.532151632760669	0.4786308769027	CALM1/ITGA1	2	23	703	20973	23/20973
	GO:0034312	diol biosynthetic process	2/703	2/23	0.17930154112837	0.532151632760669	0.4786308769027	ABCA2/PCBD1	2	23	703	20973	23/20973
	GO:0035988	chondrocyte proliferation	2/703	2/23	0.17930154112837	0.532151632760669	0.4786308769027	HMGA2/CCN2	2	23	703	20973	23/20973
	GO:0060231	mesenchymal to epithelial transition	2/703	2/23	0.17930154112837	0.532151632760669	0.4786308769027	PAX2/CTNNB1	2	23	703	20973	23/20973
	GO:0060479	lung cell differentiation	2/703	2/23	0.17930154112837	0.532151632760669	0.4786308769027	FOXA1/CTNNB1	2	23	703	20973	23/20973
	GO:0070207	protein homotrimerization	2/703	2/23	0.17930154112837	0.532151632760669	0.4786308769027	MIF/SIGMAR1	2	23	703	20973	23/20973
	GO:0072077	renal vesicle morphogenesis	2/703	2/23	0.17930154112837	0.532151632760669	0.4786308769027	PAX2/CTNNB1	2	23	703	20973	23/20973
	GO:0097164	ammonium ion metabolic process	2/703	2/23	0.17930154112837	0.532151632760669	0.4786308769027	BCHE/ALDH2	2	23	703	20973	23/20973
	GO:0106030	neuron projection fasciculation	2/703	2/23	0.17930154112837	0.532151632760669	0.4786308769027	NRP1/NDN	2	23	703	20973	23/20973
	GO:0140112	extracellular vesicle biogenesis	2/703	2/23	0.17930154112837	0.532151632760669	0.4786308769027	SDC4/SDC1	2	23	703	20973	23/20973
	GO:0140747	regulation of ncRNA transcription	2/703	2/23	0.17930154112837	0.532151632760669	0.4786308769027	MACROH2A2/NCL	2	23	703	20973	23/20973
	GO:1900424	regulation of defense response to bacterium	2/703	2/23	0.17930154112837	0.532151632760669	0.4786308769027	F2RL1/ARG2	2	23	703	20973	23/20973
	GO:2000114	regulation of establishment of cell polarity	2/703	2/23	0.17930154112837	0.532151632760669	0.4786308769027	SHTN1/KIF20B	2	23	703	20973	23/20973
	GO:0001933	negative regulation of protein phosphorylation	16/703	16/369	0.178032769528276	0.532151632760669	0.4786308769027	PARP14/SFN/INPP5F/CALM1/PLEC/PPIA/ARRB2/IBTK/THY1/SRCIN1/ENPP1/SMCR8/PLPP3/CAV1/APOE/INPP5K	16	369	703	20973	369/20973
	GO:0031647	regulation of protein stability	15/703	15/343	0.17924153160329	0.532151632760669	0.4786308769027	PARVA/BAG3/LMNA/SERF2/TRIM21/ANK2/MAPK1/BAG6/WDR81/SREBF1/CLU/CTNND1/PLPP3/TP53/TMEM88	15	343	703	20973	343/20973
	GO:0071695	anatomical structure maturation	12/703	12/264	0.177834088615696	0.532151632760669	0.4786308769027	ALDH1A2/FERMT1/FOXA1/TRIM58/G6PD/FBXO5/DCHS1/PAX2/CTNNB1/RFLNB/GJA1/IFT80	12	264	703	20973	264/20973
	GO:0090257	regulation of muscle system process	12/703	12/264	0.177834088615696	0.532151632760669	0.4786308769027	GLRX3/LMNA/ANK2/GSTM2/CALM1/G6PD/CAMK2G/PKP2/ITGA2/DSC2/CAV1/CCN2	12	264	703	20973	264/20973
	GO:0043112	receptor metabolic process	4/703	4/66	0.180111541584169	0.533534297393708	0.479874481065559	INPP5F/ABCA2/VAMP3/APOE	4	66	703	20973	66/20973
	GO:0044784	metaphase/anaphase transition of cell cycle	4/703	4/66	0.180111541584169	0.533534297393708	0.479874481065559	FBXO5/BUB1B/BUB1/AURKB	4	66	703	20973	66/20973
	GO:2000736	regulation of stem cell differentiation	4/703	4/66	0.180111541584169	0.533534297393708	0.479874481065559	STAT3/LBH/TBX5/OCIAD1	4	66	703	20973	66/20973
	GO:0098813	nuclear chromosome segregation	14/703	14/317	0.180194666607244	0.533534297393708	0.479874481065559	MAEL/ABRAXAS2/MCMBP/FBXO5/CHMP1A/BAG6/CDCA5/BUB1B/RMI1/SLF2/BUB1/HASPIN/CTNNB1/AURKB	14	317	703	20973	317/20973
	GO:0048660	regulation of smooth muscle cell proliferation	9/703	9/188	0.181224582010258	0.535631234994814	0.481760520722379	MYD88/HPGD/FOXJ2/THBS1/ITGA2/BMPR1A/CTNNB1/APOE/GJA1	9	188	703	20973	188/20973
	GO:1905475	regulation of protein localization to membrane	9/703	9/188	0.181224582010258	0.535631234994814	0.481760520722379	CSK/STX8/EPHA2/LRP4/SLC7A11/CDH2/AKAP5/MYO1C/INPP5K	9	188	703	20973	188/20973
	GO:0031668	cellular response to extracellular stimulus	12/703	12/265	0.181016483249472	0.535631234994814	0.481760520722379	WDR45/MAPK1/PLEC/NUDT1/DCTPP1/TTC5/XPR1/SREBF1/DSC2/TP53/MYBBP1A/FAS	12	265	703	20973	265/20973
	GO:0097553	calcium ion transmembrane import into cytosol	8/703	8/163	0.182061470026931	0.535739311341968	0.481857727371059	ITPR2/ANK2/GSTM2/CALM1/IBTK/THY1/JPH1/RASA3	8	163	703	20973	163/20973
	GO:0010595	positive regulation of endothelial cell migration	7/703	7/138	0.181596805286885	0.535739311341968	0.481857727371059	ANXA3/ANXA1/NRP1/MAP2K3/SPARC/THBS1/PLPP3	7	138	703	20973	138/20973
	GO:0009299	mRNA transcription	3/703	3/44	0.182440954673211	0.535739311341968	0.481857727371059	STAT3/SREBF1/TP53	3	44	703	20973	44/20973
	GO:0009394	2'-deoxyribonucleotide metabolic process	3/703	3/44	0.182440954673211	0.535739311341968	0.481857727371059	TYMP/DCTPP1/SHMT1	3	44	703	20973	44/20973
	GO:0010712	regulation of collagen metabolic process	3/703	3/44	0.182440954673211	0.535739311341968	0.481857727371059	ARRB2/ITGA2/CCN2	3	44	703	20973	44/20973
	GO:0014014	negative regulation of gliogenesis	3/703	3/44	0.182440954673211	0.535739311341968	0.481857727371059	RNF10/CTNNB1/LIN28A	3	44	703	20973	44/20973
	GO:0033574	response to testosterone	3/703	3/44	0.182440954673211	0.535739311341968	0.481857727371059	NQO1/MSN/THBS1	3	44	703	20973	44/20973
	GO:0039528	cytoplasmic pattern recognition receptor signaling pathway in response to virus	3/703	3/44	0.182440954673211	0.535739311341968	0.481857727371059	TSPAN6/UFD1/C1QBP	3	44	703	20973	44/20973
	GO:0051085	chaperone cofactor-dependent protein refolding	3/703	3/44	0.182440954673211	0.535739311341968	0.481857727371059	TOR2A/TOR1A/HSPA2	3	44	703	20973	44/20973
	GO:0071634	regulation of transforming growth factor beta production	3/703	3/44	0.182440954673211	0.535739311341968	0.481857727371059	FERMT1/THBS1/BMPR1A	3	44	703	20973	44/20973
	GO:2001222	regulation of neuron migration	3/703	3/44	0.182440954673211	0.535739311341968	0.481857727371059	SHTN1/STAT3/KIF20B	3	44	703	20973	44/20973
	GO:0043547	positive regulation of GTPase activity	14/703	14/318	0.183110455615032	0.537115250947724	0.483095282871268	CDKL5/DOCK11/RGS10/LIMS1/TBC1D17/EPHA2/THY1/DVL2/ABR/NEDD9/SMCR8/SIPA1L2/RAP1GAP2/F2RL1	14	318	703	20973	318/20973
	GO:0061138	morphogenesis of a branching epithelium	10/703	10/214	0.183124579051847	0.537115250947724	0.483095282871268	PML/NRP1/FOXA1/ILK/DCHS1/PAX2/EPHA2/CTNNB1/CELSR1/SPINT2	10	214	703	20973	214/20973
	GO:0046330	positive regulation of JNK cascade	6/703	6/114	0.184065030082857	0.539556822337952	0.485291295029425	MYD88/CRACR2A/TNIK/MINK1/CCN2/F2RL1	6	114	703	20973	114/20973
	GO:0030500	regulation of bone mineralization	5/703	5/90	0.184311701500672	0.539646511720901	0.485371963969192	BMPR1A/ENPP1/CCN1/RFLNB/GJA1	5	90	703	20973	90/20973
	GO:0050918	positive chemotaxis	5/703	5/90	0.184311701500672	0.539646511720901	0.485371963969192	F3/NRP1/MIF/ITGA2/F2RL1	5	90	703	20973	90/20973
	GO:0051028	mRNA transport	7/703	7/139	0.186136675576145	0.544670588460951	0.48989074791662	NXF2/PEG10/ALKBH5/NCBP3/SMG6/HNRNPA3/MYO1C	7	139	703	20973	139/20973
	GO:0032835	glomerulus development	4/703	4/67	0.186857888498663	0.546460862441933	0.491500966419508	LAMB2/PAX2/PROM1/PODXL	4	67	703	20973	67/20973
	GO:0015931	nucleobase-containing compound transport	11/703	11/241	0.187450060733585	0.547871886111326	0.49277007742967	NXF2/SNUPN/SLC35A4/SLC25A32/PEG10/RFTN1/ALKBH5/NCBP3/SMG6/HNRNPA3/MYO1C	11	241	703	20973	241/20973
	GO:0002181	cytoplasmic translation	8/703	8/165	0.190422045028733	0.549139008418612	0.493909759850511	RPL37/EIF3A/RPS5/RPL34/DPH6/RPL22L1/ZNF385A/LIN28A	8	165	703	20973	165/20973
	GO:0050921	positive regulation of chemotaxis	8/703	8/165	0.190422045028733	0.549139008418612	0.493909759850511	F3/NRP1/MAPK1/THBS1/ITGA2/RARRES2/C1QBP/F2RL1	8	165	703	20973	165/20973
	GO:0001101	response to acid chemical	7/703	7/140	0.190722846964596	0.549139008418612	0.493909759850511	NQO1/ASS1/CPS1/GCLC/PLEC/COL4A6/CCN2	7	140	703	20973	140/20973
	GO:0032231	regulation of actin filament bundle assembly	6/703	6/115	0.189133997914684	0.549139008418612	0.493909759850511	NRP1/CGNL1/SDC4/LIMCH1/INPP5K/CCN2	6	115	703	20973	115/20973
	GO:0140053	mitochondrial gene expression	6/703	6/115	0.189133997914684	0.549139008418612	0.493909759850511	TFAM/MTERF2/SUPV3L1/ELAC2/TWNK/C1QBP	6	115	703	20973	115/20973
	GO:0031424	keratinization	5/703	5/91	0.19007696014521	0.549139008418612	0.493909759850511	SFN/HRNR/KRT8/PPL/KRT86	5	91	703	20973	91/20973
	GO:1903363	negative regulation of cellular protein catabolic process	5/703	5/91	0.19007696014521	0.549139008418612	0.493909759850511	PML/F8A1/EIF3H/BAG6/MAP1A	5	91	703	20973	91/20973
	GO:0000266	mitochondrial fission	3/703	3/45	0.190954075399278	0.549139008418612	0.493909759850511	MAPT/STAT2/MTFR2	3	45	703	20973	45/20973
	GO:0006882	cellular zinc ion homeostasis	3/703	3/45	0.190954075399278	0.549139008418612	0.493909759850511	MT2A/SLC39A14/S100A9	3	45	703	20973	45/20973
	GO:0008631	intrinsic apoptotic signaling pathway in response to oxidative stress	3/703	3/45	0.190954075399278	0.549139008418612	0.493909759850511	PML/PPIA/DIABLO	3	45	703	20973	45/20973
	GO:0009262	deoxyribonucleotide metabolic process	3/703	3/45	0.190954075399278	0.549139008418612	0.493909759850511	TYMP/DCTPP1/SHMT1	3	45	703	20973	45/20973
	GO:0032467	positive regulation of cytokinesis	3/703	3/45	0.190954075399278	0.549139008418612	0.493909759850511	KIF20B/AURKB/CENPV	3	45	703	20973	45/20973
	GO:0034331	cell junction maintenance	3/703	3/45	0.190954075399278	0.549139008418612	0.493909759850511	CTBP2/F2RL1/CLDN3	3	45	703	20973	45/20973
	GO:0045214	sarcomere organization	3/703	3/45	0.190954075399278	0.549139008418612	0.493909759850511	PLEC/CSRP2/KRT19	3	45	703	20973	45/20973
	GO:0071763	nuclear membrane organization	3/703	3/45	0.190954075399278	0.549139008418612	0.493909759850511	CHMP1A/TOR1A/PAFAH1B1	3	45	703	20973	45/20973
	GO:0002029	desensitization of G protein-coupled receptor signaling pathway	2/703	2/24	0.19151154207512	0.549139008418612	0.493909759850511	ARRB1/ARRB2	2	24	703	20973	24/20973
	GO:0002902	regulation of B cell apoptotic process	2/703	2/24	0.19151154207512	0.549139008418612	0.493909759850511	MIF/AURKB	2	24	703	20973	24/20973
	GO:0010560	positive regulation of glycoprotein biosynthetic process	2/703	2/24	0.19151154207512	0.549139008418612	0.493909759850511	ABCA2/CTNNB1	2	24	703	20973	24/20973
	GO:0015812	gamma-aminobutyric acid transport	2/703	2/24	0.19151154207512	0.549139008418612	0.493909759850511	SLC6A11/SV2A	2	24	703	20973	24/20973
	GO:0018230	peptidyl-L-cysteine S-palmitoylation	2/703	2/24	0.19151154207512	0.549139008418612	0.493909759850511	ZDHHC6/ZDHHC18	2	24	703	20973	24/20973
	GO:0018231	peptidyl-S-diacylglycerol-L-cysteine biosynthetic process from peptidyl-cysteine	2/703	2/24	0.19151154207512	0.549139008418612	0.493909759850511	ZDHHC6/ZDHHC18	2	24	703	20973	24/20973
	GO:0022401	negative adaptation of signaling pathway	2/703	2/24	0.19151154207512	0.549139008418612	0.493909759850511	ARRB1/ARRB2	2	24	703	20973	24/20973
	GO:0030194	positive regulation of blood coagulation	2/703	2/24	0.19151154207512	0.549139008418612	0.493909759850511	F3/THBS1	2	24	703	20973	24/20973
	GO:0032740	positive regulation of interleukin-17 production	2/703	2/24	0.19151154207512	0.549139008418612	0.493909759850511	MYD88/RFTN1	2	24	703	20973	24/20973
	GO:0044321	response to leptin	2/703	2/24	0.19151154207512	0.549139008418612	0.493909759850511	STAT3/CCND1	2	24	703	20973	24/20973
	GO:0071816	tail-anchored membrane protein insertion into ER membrane	2/703	2/24	0.19151154207512	0.549139008418612	0.493909759850511	BAG6/EMC6	2	24	703	20973	24/20973
	GO:0072079	nephron tubule formation	2/703	2/24	0.19151154207512	0.549139008418612	0.493909759850511	PAX2/CTNNB1	2	24	703	20973	24/20973
	GO:0072087	renal vesicle development	2/703	2/24	0.19151154207512	0.549139008418612	0.493909759850511	PAX2/CTNNB1	2	24	703	20973	24/20973
	GO:0090103	cochlea morphogenesis	2/703	2/24	0.19151154207512	0.549139008418612	0.493909759850511	PAX2/DVL2	2	24	703	20973	24/20973
	GO:1900048	positive regulation of hemostasis	2/703	2/24	0.19151154207512	0.549139008418612	0.493909759850511	F3/THBS1	2	24	703	20973	24/20973
	GO:2000209	regulation of anoikis	2/703	2/24	0.19151154207512	0.549139008418612	0.493909759850511	MYBBP1A/CAV1	2	24	703	20973	24/20973
	GO:0045444	fat cell differentiation	12/703	12/268	0.19072462203245	0.549139008418612	0.493909759850511	KLF4/CTBP2/AAMDC/HMGA2/SREBF1/ENPP1/NOC3L/RARRES2/DHRS7B/ZNF385A/CCND1/UCP1	12	268	703	20973	268/20973
	GO:0008154	actin polymerization or depolymerization	10/703	10/216	0.190385153927191	0.549139008418612	0.493909759850511	ARHGAP18/HCLS1/CORO7/DIAPH2/ADD3/BAIAP2L1/TMOD1/LIMA1/SPTBN2/F2RL1	10	216	703	20973	216/20973
	GO:0048659	smooth muscle cell proliferation	9/703	9/191	0.192871710046227	0.552721854091166	0.497132263476339	MYD88/HPGD/FOXJ2/THBS1/ITGA2/BMPR1A/CTNNB1/APOE/GJA1	9	191	703	20973	191/20973
	GO:0001756	somitogenesis	4/703	4/68	0.193684330332631	0.552830417149423	0.497229907885515	ALDH1A2/ROR2/BMPR1A/TP53	4	68	703	20973	68/20973
	GO:0003170	heart valve development	4/703	4/68	0.193684330332631	0.552830417149423	0.497229907885515	TBX5/DCHS1/BMPR1A/CCN1	4	68	703	20973	68/20973
	GO:0040014	regulation of multicellular organism growth	4/703	4/68	0.193684330332631	0.552830417149423	0.497229907885515	STAT3/NPY1R/SGPL1/RAI1	4	68	703	20973	68/20973
	GO:0045682	regulation of epidermis development	4/703	4/68	0.193684330332631	0.552830417149423	0.497229907885515	SFN/NME2/SRSF6/MACROH2A2	4	68	703	20973	68/20973
	GO:0051306	mitotic sister chromatid separation	4/703	4/68	0.193684330332631	0.552830417149423	0.497229907885515	FBXO5/BUB1B/BUB1/AURKB	4	68	703	20973	68/20973
	GO:1904356	regulation of telomere maintenance via telomere lengthening	4/703	4/68	0.193684330332631	0.552830417149423	0.497229907885515	MAPK1/SMG6/CTNNB1/AURKB	4	68	703	20973	68/20973
	GO:0060249	anatomical structure homeostasis	15/703	15/348	0.193404939274333	0.552830417149423	0.497229907885515	ABCA3/BAG3/PFKM/CSK/SLC22A5/COL2A1/CXADR/JAM2/MAP1A/PROM1/DRAM2/CTNNB1/CCN2/GJA1/CLDN3	15	348	703	20973	348/20973
	GO:0014812	muscle cell migration	6/703	6/116	0.194256287139925	0.553500205613502	0.497832332871488	ANXA1/PARVA/S100A11/NRP1/ITGA2/BMPR1A	6	116	703	20973	116/20973
	GO:0031058	positive regulation of histone modification	6/703	6/116	0.194256287139925	0.553500205613502	0.497832332871488	RPS6KA5/LMNA/ARRB1/SREBF1/CTNNB1/TP53	6	116	703	20973	116/20973
	GO:0044242	cellular lipid catabolic process	11/703	11/243	0.19436223436358	0.553500205613502	0.497832332871488	DECR1/INPP5F/CPS1/EHHADH/MLYCD/IVD/SGPL1/TYSND1/CRAT/ACADVL/ACADL	11	243	703	20973	243/20973
	GO:0060348	bone development	11/703	11/243	0.19436223436358	0.553500205613502	0.497832332871488	AMER1/DCHS1/COL2A1/ALPL/PAFAH1B1/TP53/ZNF385A/RFLNB/GJA1/IFT80/GNAS	11	243	703	20973	243/20973
	GO:0034754	cellular hormone metabolic process	8/703	8/166	0.194662087261433	0.554038248359462	0.498316262367248	ALDH1A2/AKR1C1/PLEKHA1/RBP1/SGPL1/DHRS2/DGAT1/CRABP2	8	166	703	20973	166/20973
	GO:0001776	leukocyte homeostasis	5/703	5/92	0.195905718908904	0.556626317377689	0.5006440382631	ANXA1/DOCK11/MIF/SLC7A11/FAS	5	92	703	20973	92/20973
	GO:0043242	negative regulation of protein-containing complex disassembly	5/703	5/92	0.195905718908904	0.556626317377689	0.5006440382631	ADD3/TMOD1/LIMA1/MID1/SPTBN2	5	92	703	20973	92/20973
	GO:1903510	mucopolysaccharide metabolic process	5/703	5/92	0.195905718908904	0.556626317377689	0.5006440382631	CD44/B3GALT6/B4GALT4/CEMIP2/B4GAT1	5	92	703	20973	92/20973
	GO:0010466	negative regulation of peptidase activity	13/703	13/296	0.196335672505244	0.557214025093009	0.501172637710756	KLF4/SFN/CD44/SERPINB6/IGBP1/PRDX3/SERPINB9/PEBP1/ARRB2/PAX2/TFPI2/THBS1/SPINT2	13	296	703	20973	296/20973
	GO:0044262	cellular carbohydrate metabolic process	13/703	13/296	0.196335672505244	0.557214025093009	0.501172637710756	GNE/PFKFB2/INPP5A/STAT3/PFKM/SORD/PGAM1/MLYCD/ITPKA/IDH2/ENPP1/TP53/INPP5K	13	296	703	20973	296/20973
	GO:0048880	sensory system development	18/703	18/430	0.197972177676829	0.561539481826098	0.505063064840375	KLF4/ALDH1A2/NRP1/LAMB2/STAT3/FREM2/NHS/PAX2/EPHA2/THY1/TMOD1/SHROOM2/NECTIN3/PROM1/OBSL1/SLC7A11/CTNNB1/GJA1	18	430	703	20973	430/20973
	GO:0008360	regulation of cell shape	8/703	8/167	0.198940936051664	0.563498018805951	0.506824623415794	ANXA1/PARVA/PDPN/MSN/ARHGAP18/DNMBP/RHOBTB3/MYH10	8	167	703	20973	167/20973
	GO:0010677	negative regulation of cellular carbohydrate metabolic process	3/703	3/46	0.199565164217763	0.563498018805951	0.506824623415794	STAT3/ENPP1/INPP5K	3	46	703	20973	46/20973
	GO:0034114	regulation of heterotypic cell-cell adhesion	3/703	3/46	0.199565164217763	0.563498018805951	0.506824623415794	KLF4/CD44/THY1	3	46	703	20973	46/20973
	GO:0070296	sarcoplasmic reticulum calcium ion transport	3/703	3/46	0.199565164217763	0.563498018805951	0.506824623415794	ANK2/GSTM2/CALM1	3	46	703	20973	46/20973
	GO:0072210	metanephric nephron development	3/703	3/46	0.199565164217763	0.563498018805951	0.506824623415794	LAMB2/PAX2/CTNNB1	3	46	703	20973	46/20973
	GO:0097242	amyloid-beta clearance	3/703	3/46	0.199565164217763	0.563498018805951	0.506824623415794	LRP4/CLU/APOE	3	46	703	20973	46/20973
	GO:1901020	negative regulation of calcium ion transmembrane transporter activity	3/703	3/46	0.199565164217763	0.563498018805951	0.506824623415794	GSTM2/CALM1/YWHAE	3	46	703	20973	46/20973
	GO:2000036	regulation of stem cell population maintenance	3/703	3/46	0.199565164217763	0.563498018805951	0.506824623415794	LBH/HMGA2/PAX2	3	46	703	20973	46/20973
	GO:2000027	regulation of animal organ morphogenesis	7/703	7/142	0.200029963746137	0.563516482605444	0.506841230232345	PAX2/ROR2/DVL2/BMPR1A/DAAM1/CTNNB1/CELSR1	7	142	703	20973	142/20973
	GO:0009206	purine ribonucleoside triphosphate biosynthetic process	4/703	4/69	0.200587048262759	0.563516482605444	0.506841230232345	AK4/NUDT2/IMPDH1/NME2	4	69	703	20973	69/20973
	GO:0019748	secondary metabolic process	4/703	4/69	0.200587048262759	0.563516482605444	0.506841230232345	AS3MT/AKR1C1/DDT/SLC7A11	4	69	703	20973	69/20973
	GO:0030865	cortical cytoskeleton organization	4/703	4/69	0.200587048262759	0.563516482605444	0.506841230232345	PLEC/RHOBTB3/PAFAH1B1/LLGL1	4	69	703	20973	69/20973
	GO:0033013	tetrapyrrole metabolic process	4/703	4/69	0.200587048262759	0.563516482605444	0.506841230232345	BLVRB/ABCB7/ABCB10/COX15	4	69	703	20973	69/20973
	GO:0033866	nucleoside bisphosphate biosynthetic process	4/703	4/69	0.200587048262759	0.563516482605444	0.506841230232345	PANK1/MLYCD/SLC25A16/ACSL6	4	69	703	20973	69/20973
	GO:0034030	ribonucleoside bisphosphate biosynthetic process	4/703	4/69	0.200587048262759	0.563516482605444	0.506841230232345	PANK1/MLYCD/SLC25A16/ACSL6	4	69	703	20973	69/20973
	GO:0034033	purine nucleoside bisphosphate biosynthetic process	4/703	4/69	0.200587048262759	0.563516482605444	0.506841230232345	PANK1/MLYCD/SLC25A16/ACSL6	4	69	703	20973	69/20973
	GO:0055021	regulation of cardiac muscle tissue growth	4/703	4/69	0.200587048262759	0.563516482605444	0.506841230232345	G6PD/TBX5/TGFBR3/BMPR1A	4	69	703	20973	69/20973
	GO:0008064	regulation of actin polymerization or depolymerization	8/703	8/168	0.203257801372784	0.564363217207365	0.507602805129558	ARHGAP18/HCLS1/ADD3/BAIAP2L1/TMOD1/LIMA1/SPTBN2/F2RL1	8	168	703	20973	168/20973
	GO:0044839	cell cycle G2/M phase transition	8/703	8/168	0.203257801372784	0.564363217207365	0.507602805129558	CALM1/FBXO5/HMGA2/UIMC1/TP53/AURKB/CCND1/HSPA2	8	168	703	20973	168/20973
	GO:0032204	regulation of telomere maintenance	5/703	5/93	0.201795723908961	0.564363217207365	0.507602805129558	PML/MAPK1/SMG6/CTNNB1/AURKB	5	93	703	20973	93/20973
	GO:0032508	DNA duplex unwinding	5/703	5/93	0.201795723908961	0.564363217207365	0.507602805129558	ANXA1/CHD3/SUPV3L1/HMGA1/TWNK	5	93	703	20973	93/20973
	GO:0042475	odontogenesis of dentin-containing tooth	5/703	5/93	0.201795723908961	0.564363217207365	0.507602805129558	BSG/BMPR1A/LRP4/CTNNA1/CTNNB1	5	93	703	20973	93/20973
	GO:2001251	negative regulation of chromosome organization	5/703	5/93	0.201795723908961	0.564363217207365	0.507602805129558	FBXO5/BUB1B/BUB1/SMG6/AURKB	5	93	703	20973	93/20973
	GO:0001919	regulation of receptor recycling	2/703	2/25	0.203826074843261	0.564363217207365	0.507602805129558	INPP5F/VAMP3	2	25	703	20973	25/20973
	GO:0009162	deoxyribonucleoside monophosphate metabolic process	2/703	2/25	0.203826074843261	0.564363217207365	0.507602805129558	TYMP/SHMT1	2	25	703	20973	25/20973
	GO:0023058	adaptation of signaling pathway	2/703	2/25	0.203826074843261	0.564363217207365	0.507602805129558	ARRB1/ARRB2	2	25	703	20973	25/20973
	GO:0030539	male genitalia development	2/703	2/25	0.203826074843261	0.564363217207365	0.507602805129558	ROR2/CTNNB1	2	25	703	20973	25/20973
	GO:0032528	microvillus organization	2/703	2/25	0.203826074843261	0.564363217207365	0.507602805129558	TNIK/PODXL	2	25	703	20973	25/20973
	GO:0032928	regulation of superoxide anion generation	2/703	2/25	0.203826074843261	0.564363217207365	0.507602805129558	MAPT/F2RL1	2	25	703	20973	25/20973
	GO:0033119	negative regulation of RNA splicing	2/703	2/25	0.203826074843261	0.564363217207365	0.507602805129558	SRSF6/C1QBP	2	25	703	20973	25/20973
	GO:0035994	response to muscle stretch	2/703	2/25	0.203826074843261	0.564363217207365	0.507602805129558	CTNNB1/CDH2	2	25	703	20973	25/20973
	GO:0036010	protein localization to endosome	2/703	2/25	0.203826074843261	0.564363217207365	0.507602805129558	NRP1/MSN	2	25	703	20973	25/20973
	GO:0045649	regulation of macrophage differentiation	2/703	2/25	0.203826074843261	0.564363217207365	0.507602805129558	HCLS1/ROR2	2	25	703	20973	25/20973
	GO:0046058	cAMP metabolic process	2/703	2/25	0.203826074843261	0.564363217207365	0.507602805129558	ADCY7/EPHA2	2	25	703	20973	25/20973
	GO:0046519	sphingoid metabolic process	2/703	2/25	0.203826074843261	0.564363217207365	0.507602805129558	ABCA2/PLPP3	2	25	703	20973	25/20973
	GO:0046618	xenobiotic export	2/703	2/25	0.203826074843261	0.564363217207365	0.507602805129558	ABCA3/SLC22A5	2	25	703	20973	25/20973
	GO:0050820	positive regulation of coagulation	2/703	2/25	0.203826074843261	0.564363217207365	0.507602805129558	F3/THBS1	2	25	703	20973	25/20973
	GO:0051647	nucleus localization	2/703	2/25	0.203826074843261	0.564363217207365	0.507602805129558	TRIM58/PAFAH1B1	2	25	703	20973	25/20973
	GO:0060333	interferon-gamma-mediated signaling pathway	2/703	2/25	0.203826074843261	0.564363217207365	0.507602805129558	PARP14/TP53	2	25	703	20973	25/20973
	GO:0070206	protein trimerization	2/703	2/25	0.203826074843261	0.564363217207365	0.507602805129558	MIF/SIGMAR1	2	25	703	20973	25/20973
	GO:1905048	regulation of metallopeptidase activity	2/703	2/25	0.203826074843261	0.564363217207365	0.507602805129558	STAT3/CLDN3	2	25	703	20973	25/20973
	GO:1905209	positive regulation of cardiocyte differentiation	2/703	2/25	0.203826074843261	0.564363217207365	0.507602805129558	TBX5/ARRB2	2	25	703	20973	25/20973
	GO:2000737	negative regulation of stem cell differentiation	2/703	2/25	0.203826074843261	0.564363217207365	0.507602805129558	STAT3/LBH	2	25	703	20973	25/20973
	GO:1901989	positive regulation of cell cycle phase transition	7/703	7/143	0.204748801060544	0.566290288647518	0.509336062788601	ANXA1/KLHL18/FBXO5/CDCA5/CCND2/CCND1/HSPA2	7	143	703	20973	143/20973
	GO:0044344	cellular response to fibroblast growth factor stimulus	6/703	6/118	0.20465490895402	0.566290288647518	0.509336062788601	CPS1/CD44/GCLC/THBS1/CTNNB1/CCN2	6	118	703	20973	118/20973
	GO:0050821	protein stabilization	10/703	10/220	0.205280480929715	0.567446597810695	0.51037607701513	PARVA/BAG3/ANK2/BAG6/WDR81/CLU/CTNND1/PLPP3/TP53/TMEM88	10	220	703	20973	220/20973
	GO:0030832	regulation of actin filament length	8/703	8/169	0.207611879883563	0.569710485882485	0.512412276222843	ARHGAP18/HCLS1/ADD3/BAIAP2L1/TMOD1/LIMA1/SPTBN2/F2RL1	8	169	703	20973	169/20973
	GO:2000045	regulation of G1/S transition of mitotic cell cycle	8/703	8/169	0.207611879883563	0.569710485882485	0.512412276222843	SLFN11/ANXA1/KLF4/PML/ECD/TP53/CCND2/CCND1	8	169	703	20973	169/20973
	GO:0001960	negative regulation of cytokine-mediated signaling pathway	5/703	5/94	0.207744701224351	0.569710485882485	0.512412276222843	PARP14/STAT2/PALM3/CAV1/F2RL1	5	94	703	20973	94/20973
	GO:0042509	regulation of tyrosine phosphorylation of STAT protein	5/703	5/94	0.207744701224351	0.569710485882485	0.512412276222843	PARP14/INPP5F/HCLS1/CRLF1/CAV1	5	94	703	20973	94/20973
	GO:0097006	regulation of plasma lipoprotein particle levels	5/703	5/94	0.207744701224351	0.569710485882485	0.512412276222843	ABCA1/CSK/VLDLR/APOE/DGAT1	5	94	703	20973	94/20973
	GO:0002090	regulation of receptor internalization	4/703	4/70	0.20756221735371	0.569710485882485	0.512412276222843	ARRB1/ARRB2/ATAD1/CD63	4	70	703	20973	70/20973
	GO:0006406	mRNA export from nucleus	4/703	4/70	0.20756221735371	0.569710485882485	0.512412276222843	NXF2/ALKBH5/NCBP3/SMG6	4	70	703	20973	70/20973
	GO:0009145	purine nucleoside triphosphate biosynthetic process	4/703	4/70	0.20756221735371	0.569710485882485	0.512412276222843	AK4/NUDT2/IMPDH1/NME2	4	70	703	20973	70/20973
	GO:0015909	long-chain fatty acid transport	4/703	4/70	0.20756221735371	0.569710485882485	0.512412276222843	ANXA1/MIF/THBS1/APOE	4	70	703	20973	70/20973
	GO:0030104	water homeostasis	4/703	4/70	0.20756221735371	0.569710485882485	0.512412276222843	SFN/PLEC/HRNR/INPP5K	4	70	703	20973	70/20973
	GO:0035306	positive regulation of dephosphorylation	4/703	4/70	0.20756221735371	0.569710485882485	0.512412276222843	CALM1/PPIA/ITGA1/ITGA2	4	70	703	20973	70/20973
	GO:0060042	retina morphogenesis in camera-type eye	4/703	4/70	0.20756221735371	0.569710485882485	0.512412276222843	THY1/NECTIN3/PROM1/OBSL1	4	70	703	20973	70/20973
	GO:0032620	interleukin-17 production	3/703	3/47	0.208266535980264	0.569710485882485	0.512412276222843	MYD88/RFTN1/ARG2	3	47	703	20973	47/20973
	GO:0032660	regulation of interleukin-17 production	3/703	3/47	0.208266535980264	0.569710485882485	0.512412276222843	MYD88/RFTN1/ARG2	3	47	703	20973	47/20973
	GO:0035337	fatty-acyl-CoA metabolic process	3/703	3/47	0.208266535980264	0.569710485882485	0.512412276222843	FAR2/ACSL6/DGAT1	3	47	703	20973	47/20973
	GO:0042554	superoxide anion generation	3/703	3/47	0.208266535980264	0.569710485882485	0.512412276222843	MAPT/SH3PXD2A/F2RL1	3	47	703	20973	47/20973
	GO:0055069	zinc ion homeostasis	3/703	3/47	0.208266535980264	0.569710485882485	0.512412276222843	MT2A/SLC39A14/S100A9	3	47	703	20973	47/20973
	GO:1990000	amyloid fibril formation	3/703	3/47	0.208266535980264	0.569710485882485	0.512412276222843	MAPT/CLU/APOE	3	47	703	20973	47/20973
	GO:0051259	protein complex oligomerization	12/703	12/273	0.207422351643115	0.569710485882485	0.512412276222843	ALDH1A2/KCTD12/ABCA3/FARSB/HPRT1/MIF/SIGMAR1/MICU1/PEG10/SHMT1/TP53/TWNK	12	273	703	20973	273/20973
	GO:0062207	regulation of pattern recognition receptor signaling pathway	7/703	7/144	0.209509725288942	0.572484178237564	0.514907006526089	TSPAN6/UFD1/ARRB2/SARM1/CAV1/C1QBP/F2RL1	7	144	703	20973	144/20973
	GO:1990266	neutrophil migration	7/703	7/144	0.209509725288942	0.572484178237564	0.514907006526089	MYD88/PPIA/BSG/ITGA1/CXADR/S100A9/C1QBP	7	144	703	20973	144/20973
	GO:0000723	telomere maintenance	7/703	7/145	0.214311643391772	0.58058890991602	0.522196610825894	PML/MAPK1/WRAP53/SMG6/CTNNB1/TNKS1BP1/AURKB	7	145	703	20973	145/20973
	GO:0002688	regulation of leukocyte chemotaxis	7/703	7/145	0.214311643391772	0.58058890991602	0.522196610825894	DDT/MAPK1/MIF/THBS1/RARRES2/C1QBP/F2RL1	7	145	703	20973	145/20973
	GO:0008286	insulin receptor signaling pathway	6/703	6/120	0.215248862253696	0.58058890991602	0.522196610825894	SLC39A14/BAIAP2L1/SREBF1/ENPP1/RARRES2/INPP5K	6	120	703	20973	120/20973
	GO:0034620	cellular response to unfolded protein	6/703	6/120	0.215248862253696	0.58058890991602	0.522196610825894	YOD1/BAG3/ABCB10/DERL2/CCND1/HSPA2	6	120	703	20973	120/20973
	GO:0034766	negative regulation of ion transmembrane transport	6/703	6/120	0.215248862253696	0.58058890991602	0.522196610825894	GSTM2/CALM1/SLC43A2/YWHAE/CAV1/SLC43A1	6	120	703	20973	120/20973
	GO:0032092	positive regulation of protein binding	5/703	5/95	0.213750359888813	0.58058890991602	0.522196610825894	PLCL2/TRIM21/NRP1/CAV1/APOE	5	95	703	20973	95/20973
	GO:0003197	endocardial cushion development	3/703	3/48	0.217050627464129	0.58058890991602	0.522196610825894	TBX5/DCHS1/BMPR1A	3	48	703	20973	48/20973
	GO:0003254	regulation of membrane depolarization	3/703	3/48	0.217050627464129	0.58058890991602	0.522196610825894	GCLC/TBX5/GJA1	3	48	703	20973	48/20973
	GO:0006984	ER-nucleus signaling pathway	3/703	3/48	0.217050627464129	0.58058890991602	0.522196610825894	ERLIN1/SREBF1/TP53	3	48	703	20973	48/20973
	GO:0009261	ribonucleotide catabolic process	3/703	3/48	0.217050627464129	0.58058890991602	0.522196610825894	HPRT1/MLYCD/ENTPD7	3	48	703	20973	48/20973
	GO:0014911	positive regulation of smooth muscle cell migration	3/703	3/48	0.217050627464129	0.58058890991602	0.522196610825894	S100A11/NRP1/ITGA2	3	48	703	20973	48/20973
	GO:0032527	protein exit from endoplasmic reticulum	3/703	3/48	0.217050627464129	0.58058890991602	0.522196610825894	YOD1/UFD1/DERL2	3	48	703	20973	48/20973
	GO:0032964	collagen biosynthetic process	3/703	3/48	0.217050627464129	0.58058890991602	0.522196610825894	ARRB2/ITGA2/CCN2	3	48	703	20973	48/20973
	GO:0055010	ventricular cardiac muscle tissue morphogenesis	3/703	3/48	0.217050627464129	0.58058890991602	0.522196610825894	TGFBR3/PKP2/BMPR1A	3	48	703	20973	48/20973
	GO:0060711	labyrinthine layer development	3/703	3/48	0.217050627464129	0.58058890991602	0.522196610825894	MAPK1/CCN1/SPINT2	3	48	703	20973	48/20973
	GO:0060976	coronary vasculature development	3/703	3/48	0.217050627464129	0.58058890991602	0.522196610825894	NRP1/TBX5/TGFBR3	3	48	703	20973	48/20973
	GO:0071604	transforming growth factor beta production	3/703	3/48	0.217050627464129	0.58058890991602	0.522196610825894	FERMT1/THBS1/BMPR1A	3	48	703	20973	48/20973
	GO:0001702	gastrulation with mouth forming second	2/703	2/26	0.216224451426374	0.58058890991602	0.522196610825894	AMOT/CTNNB1	2	26	703	20973	26/20973
	GO:0006027	glycosaminoglycan catabolic process	2/703	2/26	0.216224451426374	0.58058890991602	0.522196610825894	CD44/CEMIP2	2	26	703	20973	26/20973
	GO:0016226	iron-sulfur cluster assembly	2/703	2/26	0.216224451426374	0.58058890991602	0.522196610825894	GLRX3/ABCB7	2	26	703	20973	26/20973
	GO:0022010	central nervous system myelination	2/703	2/26	0.216224451426374	0.58058890991602	0.522196610825894	ABCA2/CLU	2	26	703	20973	26/20973
	GO:0030502	negative regulation of bone mineralization	2/703	2/26	0.216224451426374	0.58058890991602	0.522196610825894	ENPP1/RFLNB	2	26	703	20973	26/20973
	GO:0031163	metallo-sulfur cluster assembly	2/703	2/26	0.216224451426374	0.58058890991602	0.522196610825894	GLRX3/ABCB7	2	26	703	20973	26/20973
	GO:0031639	plasminogen activation	2/703	2/26	0.216224451426374	0.58058890991602	0.522196610825894	PGK1/THBS1	2	26	703	20973	26/20973
	GO:0032291	axon ensheathment in central nervous system	2/703	2/26	0.216224451426374	0.58058890991602	0.522196610825894	ABCA2/CLU	2	26	703	20973	26/20973
	GO:0032331	negative regulation of chondrocyte differentiation	2/703	2/26	0.216224451426374	0.58058890991602	0.522196610825894	CTNNB1/RFLNB	2	26	703	20973	26/20973
	GO:0060219	camera-type eye photoreceptor cell differentiation	2/703	2/26	0.216224451426374	0.58058890991602	0.522196610825894	THY1/PROM1	2	26	703	20973	26/20973
	GO:0060307	regulation of ventricular cardiac muscle cell membrane repolarization	2/703	2/26	0.216224451426374	0.58058890991602	0.522196610825894	ANK2/GJA1	2	26	703	20973	26/20973
	GO:0060384	innervation	2/703	2/26	0.216224451426374	0.58058890991602	0.522196610825894	GABRA5/NRP1	2	26	703	20973	26/20973
	GO:0060706	cell differentiation involved in embryonic placenta development	2/703	2/26	0.216224451426374	0.58058890991602	0.522196610825894	SPINT2/KRT19	2	26	703	20973	26/20973
	GO:0070199	establishment of protein localization to chromosome	2/703	2/26	0.216224451426374	0.58058890991602	0.522196610825894	WRAP53/MACROH2A2	2	26	703	20973	26/20973
	GO:0072207	metanephric epithelium development	2/703	2/26	0.216224451426374	0.58058890991602	0.522196610825894	LAMB2/PAX2	2	26	703	20973	26/20973
	GO:0090083	regulation of inclusion body assembly	2/703	2/26	0.216224451426374	0.58058890991602	0.522196610825894	CLU/HSPA2	2	26	703	20973	26/20973
	GO:1903902	positive regulation of viral life cycle	2/703	2/26	0.216224451426374	0.58058890991602	0.522196610825894	TRIM38/TRIM21	2	26	703	20973	26/20973
	GO:1904292	regulation of ERAD pathway	2/703	2/26	0.216224451426374	0.58058890991602	0.522196610825894	BAG6/CAV1	2	26	703	20973	26/20973
	GO:0071900	regulation of protein serine/threonine kinase activity	17/703	17/410	0.217117509614447	0.58058890991602	0.522196610825894	BCCIP/SFN/CALM1/CSK/MIF/CKS1B/HMGA2/THY1/ROR2/DVL2/THBS1/BMPR1A/CAV1/APOE/INPP5K/CCND2/CCND1	17	410	703	20973	410/20973
	GO:0030198	extracellular matrix organization	15/703	15/356	0.217125141886512	0.58058890991602	0.522196610825894	FERMT1/PDPN/LAMB2/PHLDB1/CTSV/COL2A1/NFKB2/COLGALT2/P4HA1/COL18A1/COL4A6/CCN1/CAV1/CCN2/SPINT2	15	356	703	20973	356/20973
	GO:0006260	DNA replication	13/703	13/302	0.215729360616601	0.58058890991602	0.522196610825894	SLFN11/S100A11/MCMBP/ID3/FBXO5/WDR18/MGME1/EXD2/RMI1/HMGA1/NOC3L/TP53/TWNK	13	302	703	20973	302/20973
	GO:0044703	multi-organism reproductive process	10/703	10/222	0.212907375734081	0.58058890991602	0.522196610825894	HPGD/HMX3/PRDX3/UMPS/BSG/TEAD3/ADCY7/ITGA2/C1QBP/GJA1	10	222	703	20973	222/20973
	GO:0031334	positive regulation of protein-containing complex assembly	10/703	10/223	0.216763841222095	0.58058890991602	0.522196610825894	MYD88/ABCA1/FERMT1/ABCA3/MAPT/MSN/BAIAP2L1/SLF2/CLU/TP53	10	223	703	20973	223/20973
	GO:0001889	liver development	7/703	7/146	0.219153448491815	0.585072942392632	0.52622966506122	ANXA1/ALDH1A2/ASS1/CPS1/TGFBR3/ITGA2/CCND1	7	146	703	20973	146/20973
	GO:0007224	smoothened signaling pathway	7/703	7/146	0.219153448491815	0.585072942392632	0.52622966506122	WDR11/FOXA1/IFT27/ROR2/CTNNA1/ENPP1/IFT80	7	146	703	20973	146/20973
	GO:0055076	transition metal ion homeostasis	7/703	7/146	0.219153448491815	0.585072942392632	0.52622966506122	MT2A/GLRX3/ABCB7/SLC39A14/FTH1/STEAP2/S100A9	7	146	703	20973	146/20973
	GO:0045069	regulation of viral genome replication	5/703	5/96	0.219810394809446	0.586513313073282	0.527525171528743	TRIM38/RESF1/PPIA/HMGA2/INPP5K	5	96	703	20973	96/20973
	GO:0043062	extracellular structure organization	15/703	15/357	0.220177206376022	0.587178401413898	0.528123369102685	FERMT1/PDPN/LAMB2/PHLDB1/CTSV/COL2A1/NFKB2/COLGALT2/P4HA1/COL18A1/COL4A6/CCN1/CAV1/CCN2/SPINT2	15	357	703	20973	357/20973
	GO:0030593	neutrophil chemotaxis	6/703	6/121	0.22061525259193	0.587747263844809	0.528635018616436	PPIA/BSG/ITGA1/CXADR/S100A9/C1QBP	6	121	703	20973	121/20973
	GO:0048568	embryonic organ development	20/703	20/493	0.220625849791595	0.587747263844809	0.528635018616436	ALDH1A2/HMX3/MAPK1/ID3/TEAD3/PAX2/COL2A1/EPHA2/ROR2/HOXB9/DVL2/SLC39A1/BMPR1A/CCN1/CTNNB1/TP53/RARRES2/GJA1/SPINT2/KRT19	20	493	703	20973	493/20973
	GO:0002687	positive regulation of leukocyte migration	8/703	8/172	0.220889174565834	0.588135088995918	0.528983838540557	MAPK1/THY1/JAM2/THBS1/ITGA2/RARRES2/C1QBP/F2RL1	8	172	703	20973	172/20973
	GO:0046847	filopodium assembly	4/703	4/72	0.221714614068217	0.589390365764101	0.530112866778607	DOCK11/NRP1/TTYH1/FXR2	4	72	703	20973	72/20973
	GO:0050709	negative regulation of protein secretion	4/703	4/72	0.221714614068217	0.589390365764101	0.530112866778607	SERGEF/SRCIN1/SREBF1/APOE	4	72	703	20973	72/20973
	GO:2001259	positive regulation of cation channel activity	4/703	4/72	0.221714614068217	0.589390365764101	0.530112866778607	ANK2/CRACR2A/GSTM2/CALM1	4	72	703	20973	72/20973
	GO:0044706	multi-multicellular organism process	10/703	10/225	0.224560157544662	0.596637227093397	0.536630880403481	HPGD/HMX3/PRDX3/UMPS/BSG/TEAD3/ADCY7/ITGA2/C1QBP/GJA1	10	225	703	20973	225/20973
	GO:0090068	positive regulation of cell cycle process	12/703	12/278	0.224730059046848	0.596771209430626	0.536751387566495	ANXA1/KLHL18/FBXO5/CDCA5/SLF2/KIF20B/AURKB/CENPV/CCN2/CCND2/CCND1/HSPA2	12	278	703	20973	278/20973
	GO:0071453	cellular response to oxygen levels	8/703	8/173	0.225383828040466	0.597038122697623	0.536991456229588	AK4/LMNA/PGK1/HIF1AN/DDAH1/TP53/CAV1/FAS	8	173	703	20973	173/20973
	GO:0031398	positive regulation of protein ubiquitination	6/703	6/122	0.226025843848089	0.597038122697623	0.536991456229588	AMER1/UBE2S/MAGEA2/UBE2L3/MTA1/CAV1	6	122	703	20973	122/20973
	GO:0032642	regulation of chemokine production	6/703	6/122	0.226025843848089	0.597038122697623	0.536991456229588	MYD88/KLF4/MIF/EPHA2/F2RL1/ARG2	6	122	703	20973	122/20973
	GO:0090502	RNA phosphodiester bond hydrolysis, endonucleolytic	5/703	5/97	0.225922489608847	0.597038122697623	0.536991456229588	NUDT12/TBL3/TSR1/ELAC2/SMG6	5	97	703	20973	97/20973
	GO:0106027	neuron projection organization	5/703	5/97	0.225922489608847	0.597038122697623	0.536991456229588	SRCIN1/ITPKA/MAP1A/PAFAH1B1/APOE	5	97	703	20973	97/20973
	GO:0022602	ovulation cycle process	3/703	3/49	0.225910007249633	0.597038122697623	0.536991456229588	PLEKHA1/ARRB2/SGPL1	3	49	703	20973	49/20973
	GO:0030195	negative regulation of blood coagulation	3/703	3/49	0.225910007249633	0.597038122697623	0.536991456229588	CD9/THBS1/APOE	3	49	703	20973	49/20973
	GO:0048146	positive regulation of fibroblast proliferation	3/703	3/49	0.225910007249633	0.597038122697623	0.536991456229588	PML/MIF/ZMIZ1	3	49	703	20973	49/20973
	GO:0051084	'de novo' post-translational protein folding	3/703	3/49	0.225910007249633	0.597038122697623	0.536991456229588	TOR2A/TOR1A/HSPA2	3	49	703	20973	49/20973
	GO:0061001	regulation of dendritic spine morphogenesis	3/703	3/49	0.225910007249633	0.597038122697623	0.536991456229588	SRCIN1/ITPKA/PAFAH1B1	3	49	703	20973	49/20973
	GO:0033045	regulation of sister chromatid segregation	4/703	4/73	0.228884213306467	0.598574159929739	0.538373007656104	FBXO5/BUB1B/BUB1/AURKB	4	73	703	20973	73/20973
	GO:0042246	tissue regeneration	4/703	4/73	0.228884213306467	0.598574159929739	0.538373007656104	ANXA1/CD9/EPPK1/GJA1	4	73	703	20973	73/20973
	GO:1905818	regulation of chromosome separation	4/703	4/73	0.228884213306467	0.598574159929739	0.538373007656104	FBXO5/BUB1B/BUB1/AURKB	4	73	703	20973	73/20973
	GO:0002026	regulation of the force of heart contraction	2/703	2/27	0.228687249611976	0.598574159929739	0.538373007656104	GLRX3/CAV1	2	27	703	20973	27/20973
	GO:0002433	immune response-regulating cell surface receptor signaling pathway involved in phagocytosis	2/703	2/27	0.228687249611976	0.598574159929739	0.538373007656104	VAV2/PLD2	2	27	703	20973	27/20973
	GO:0002689	negative regulation of leukocyte chemotaxis	2/703	2/27	0.228687249611976	0.598574159929739	0.538373007656104	DDT/MIF	2	27	703	20973	27/20973
	GO:0006896	Golgi to vacuole transport	2/703	2/27	0.228687249611976	0.598574159929739	0.538373007656104	VTI1A/ANKFY1	2	27	703	20973	27/20973
	GO:0010894	negative regulation of steroid biosynthetic process	2/703	2/27	0.228687249611976	0.598574159929739	0.538373007656104	ERLIN1/APOE	2	27	703	20973	27/20973
	GO:0021544	subpallium development	2/703	2/27	0.228687249611976	0.598574159929739	0.538373007656104	HPRT1/SLC7A11	2	27	703	20973	27/20973
	GO:0021895	cerebral cortex neuron differentiation	2/703	2/27	0.228687249611976	0.598574159929739	0.538373007656104	HPRT1/PAFAH1B1	2	27	703	20973	27/20973
	GO:0038095	Fc-epsilon receptor signaling pathway	2/703	2/27	0.228687249611976	0.598574159929739	0.538373007656104	VAV2/MAP2K4	2	27	703	20973	27/20973
	GO:0038096	Fc-gamma receptor signaling pathway involved in phagocytosis	2/703	2/27	0.228687249611976	0.598574159929739	0.538373007656104	VAV2/PLD2	2	27	703	20973	27/20973
	GO:0048643	positive regulation of skeletal muscle tissue development	2/703	2/27	0.228687249611976	0.598574159929739	0.538373007656104	NIBAN2/CTNNB1	2	27	703	20973	27/20973
	GO:0070861	regulation of protein exit from endoplasmic reticulum	2/703	2/27	0.228687249611976	0.598574159929739	0.538373007656104	YOD1/DERL2	2	27	703	20973	27/20973
	GO:0071459	protein localization to chromosome, centromeric region	2/703	2/27	0.228687249611976	0.598574159929739	0.538373007656104	HASPIN/AURKB	2	27	703	20973	27/20973
	GO:1900221	regulation of amyloid-beta clearance	2/703	2/27	0.228687249611976	0.598574159929739	0.538373007656104	CLU/APOE	2	27	703	20973	27/20973
	GO:1903020	positive regulation of glycoprotein metabolic process	2/703	2/27	0.228687249611976	0.598574159929739	0.538373007656104	ABCA2/CTNNB1	2	27	703	20973	27/20973
	GO:1904385	cellular response to angiotensin	2/703	2/27	0.228687249611976	0.598574159929739	0.538373007656104	CAV1/AGTRAP	2	27	703	20973	27/20973
	GO:0033002	muscle cell proliferation	11/703	11/252	0.226811553104225	0.598574159929739	0.538373007656104	MYD88/HPGD/FOXJ2/TBX5/TGFBR3/THBS1/ITGA2/BMPR1A/CTNNB1/APOE/GJA1	11	252	703	20973	252/20973
	GO:0090287	regulation of cellular response to growth factor stimulus	14/703	14/333	0.229458552433831	0.599762150396121	0.539441516862261	FERMT1/ILK/NIBAN2/TGFBR3/SCUBE3/PEG10/THBS1/CCN1/CTNNB1/EPN2/TP53/CAV1/MYO1C/CD63	14	333	703	20973	333/20973
	GO:0043254	regulation of protein-containing complex assembly	18/703	18/442	0.230625397513108	0.602496789005218	0.541901121221067	MYD88/ABCA1/FERMT1/ABCA3/MAPT/MSN/ARHGAP18/HCLS1/TUBB4A/ADD3/STXBP6/BAIAP2L1/TMOD1/SLF2/SPTBN2/CLU/TP53/APOE	18	442	703	20973	442/20973
	GO:0032602	chemokine production	6/703	6/123	0.231479064380073	0.604410834594074	0.543622663094149	MYD88/KLF4/MIF/EPHA2/F2RL1/ARG2	6	123	703	20973	123/20973
	GO:0007260	tyrosine phosphorylation of STAT protein	5/703	5/98	0.232084319389015	0.605042367091925	0.544190679679329	PARP14/INPP5F/HCLS1/CRLF1/CAV1	5	98	703	20973	98/20973
	GO:1902807	negative regulation of cell cycle G1/S phase transition	5/703	5/98	0.232084319389015	0.605042367091925	0.544190679679329	SLFN11/KLF4/PML/TP53/CCND1	5	98	703	20973	98/20973
	GO:2000772	regulation of cellular senescence	5/703	5/98	0.232084319389015	0.605042367091925	0.544190679679329	FBXO5/HMGA2/BMPR1A/TP53/ARG2	5	98	703	20973	98/20973
	GO:0051783	regulation of nuclear division	7/703	7/149	0.233906929780819	0.609040880329831	0.547787045413354	FBXO5/BUB1B/TOM1L2/KIF20B/BUB1/OBSL1/AURKB	7	149	703	20973	149/20973
	GO:0061008	hepaticobiliary system development	7/703	7/149	0.233906929780819	0.609040880329831	0.547787045413354	ANXA1/ALDH1A2/ASS1/CPS1/TGFBR3/ITGA2/CCND1	7	149	703	20973	149/20973
	GO:0032435	negative regulation of proteasomal ubiquitin-dependent protein catabolic process	3/703	3/50	0.234837384487538	0.609040880329831	0.547787045413354	EIF3H/BAG6/MAP1A	3	50	703	20973	50/20973
	GO:0042908	xenobiotic transport	3/703	3/50	0.234837384487538	0.609040880329831	0.547787045413354	ABCA3/SLC22A5/GJA1	3	50	703	20973	50/20973
	GO:0051489	regulation of filopodium assembly	3/703	3/50	0.234837384487538	0.609040880329831	0.547787045413354	DOCK11/NRP1/FXR2	3	50	703	20973	50/20973
	GO:0060043	regulation of cardiac muscle cell proliferation	3/703	3/50	0.234837384487538	0.609040880329831	0.547787045413354	TBX5/TGFBR3/BMPR1A	3	50	703	20973	50/20973
	GO:0060443	mammary gland morphogenesis	3/703	3/50	0.234837384487538	0.609040880329831	0.547787045413354	PML/EPHA2/CAV1	3	50	703	20973	50/20973
	GO:0072583	clathrin-dependent endocytosis	3/703	3/50	0.234837384487538	0.609040880329831	0.547787045413354	SH3GL3/INPP5F/DNAJC6	3	50	703	20973	50/20973
	GO:1900047	negative regulation of hemostasis	3/703	3/50	0.234837384487538	0.609040880329831	0.547787045413354	CD9/THBS1/APOE	3	50	703	20973	50/20973
	GO:1901985	positive regulation of protein acetylation	3/703	3/50	0.234837384487538	0.609040880329831	0.547787045413354	RPS6KA5/PML/ARRB1	3	50	703	20973	50/20973
	GO:0050808	synapse organization	19/703	19/471	0.235099138054316	0.609403318412718	0.548113031554814	CDKL5/NRP1/MAPT/LAMB2/CTBP2/FARP1/SRCIN1/ITPKA/SPTBN2/LRP4/PCDHGC3/PAFAH1B1/OBSL1/SLC7A11/CTNNB1/LRRN1/CDH2/APOE/INA	19	471	703	20973	471/20973
	GO:0003208	cardiac ventricle morphogenesis	4/703	4/74	0.236111017419568	0.610758431906133	0.549331855513487	TBX5/TGFBR3/PKP2/BMPR1A	4	74	703	20973	74/20973
	GO:0031100	animal organ regeneration	4/703	4/74	0.236111017419568	0.610758431906133	0.549331855513487	ANXA3/TGFBR3/PTPRU/CCND1	4	74	703	20973	74/20973
	GO:0060415	muscle tissue morphogenesis	4/703	4/74	0.236111017419568	0.610758431906133	0.549331855513487	TGFBR3/PKP2/MYLK/BMPR1A	4	74	703	20973	74/20973
	GO:0070059	intrinsic apoptotic signaling pathway in response to endoplasmic reticulum stress	4/703	4/74	0.236111017419568	0.610758431906133	0.549331855513487	PML/BAG6/ATP2A3/TP53	4	74	703	20973	74/20973
	GO:0001763	morphogenesis of a branching structure	10/703	10/228	0.236454913714084	0.611331415114828	0.549847211360852	PML/NRP1/FOXA1/ILK/DCHS1/PAX2/EPHA2/CTNNB1/CELSR1/SPINT2	10	228	703	20973	228/20973
	GO:0043500	muscle adaptation	6/703	6/124	0.236973332016488	0.612038155854372	0.550482872174587	GLRX3/INPP5F/LMNA/G6PD/CAMK2G/GATM	6	124	703	20973	124/20973
	GO:0071774	response to fibroblast growth factor	6/703	6/124	0.236973332016488	0.612038155854372	0.550482872174587	CPS1/CD44/GCLC/THBS1/CTNNB1/CCN2	6	124	703	20973	124/20973
	GO:0007589	body fluid secretion	5/703	5/99	0.238293553415513	0.614494733768966	0.55269238158705	APRT/UMPS/CAV1/GJA1/CCND1	5	99	703	20973	99/20973
	GO:0032091	negative regulation of protein binding	5/703	5/99	0.238293553415513	0.614494733768966	0.55269238158705	ARRB2/ATP2A3/CAV1/DHRS7B/AURKB	5	99	703	20973	99/20973
	GO:0032392	DNA geometric change	5/703	5/99	0.238293553415513	0.614494733768966	0.55269238158705	ANXA1/CHD3/SUPV3L1/HMGA1/TWNK	5	99	703	20973	99/20973
	GO:0030534	adult behavior	7/703	7/150	0.238896971181189	0.61541535381642	0.553520410955899	INPP5F/ARRB2/TMOD1/SPTBN2/EFNB3/PAFAH1B1/SLC7A11	7	150	703	20973	150/20973
	GO:0019216	regulation of lipid metabolic process	15/703	15/363	0.238870729565211	0.61541535381642	0.553520410955899	ANXA1/ABCA3/CES1/VAV2/ABCA2/MLYCD/ERLIN1/SREBF1/CCN1/TYSND1/CAV1/RARRES2/APOE/ACADVL/ACADL	15	363	703	20973	363/20973
	GO:0002360	T cell lineage commitment	2/703	2/28	0.241196251569799	0.616568718828631	0.554557777137263	STAT3/TP53	2	28	703	20973	28/20973
	GO:0003272	endocardial cushion formation	2/703	2/28	0.241196251569799	0.616568718828631	0.554557777137263	DCHS1/BMPR1A	2	28	703	20973	28/20973
	GO:0009435	NAD biosynthetic process	2/703	2/28	0.241196251569799	0.616568718828631	0.554557777137263	NAPRT/NUDT12	2	28	703	20973	28/20973
	GO:0015012	heparan sulfate proteoglycan biosynthetic process	2/703	2/28	0.241196251569799	0.616568718828631	0.554557777137263	B3GALT6/CTNNB1	2	28	703	20973	28/20973
	GO:0015740	C4-dicarboxylate transport	2/703	2/28	0.241196251569799	0.616568718828631	0.554557777137263	SLC25A22/SLC25A11	2	28	703	20973	28/20973
	GO:0031954	positive regulation of protein autophosphorylation	2/703	2/28	0.241196251569799	0.616568718828631	0.554557777137263	CALM1/TNKS1BP1	2	28	703	20973	28/20973
	GO:0034643	establishment of mitochondrion localization, microtubule-mediated	2/703	2/28	0.241196251569799	0.616568718828631	0.554557777137263	MAPT/HSBP1	2	28	703	20973	28/20973
	GO:0039535	regulation of RIG-I signaling pathway	2/703	2/28	0.241196251569799	0.616568718828631	0.554557777137263	UFD1/C1QBP	2	28	703	20973	28/20973
	GO:0042438	melanin biosynthetic process	2/703	2/28	0.241196251569799	0.616568718828631	0.554557777137263	DDT/SLC7A11	2	28	703	20973	28/20973
	GO:0047497	mitochondrion transport along microtubule	2/703	2/28	0.241196251569799	0.616568718828631	0.554557777137263	MAPT/HSBP1	2	28	703	20973	28/20973
	GO:0060444	branching involved in mammary gland duct morphogenesis	2/703	2/28	0.241196251569799	0.616568718828631	0.554557777137263	PML/EPHA2	2	28	703	20973	28/20973
	GO:0060561	apoptotic process involved in morphogenesis	2/703	2/28	0.241196251569799	0.616568718828631	0.554557777137263	PAX2/CCN1	2	28	703	20973	28/20973
	GO:0060669	embryonic placenta morphogenesis	2/703	2/28	0.241196251569799	0.616568718828631	0.554557777137263	CCN1/SPINT2	2	28	703	20973	28/20973
	GO:0070076	histone lysine demethylation	2/703	2/28	0.241196251569799	0.616568718828631	0.554557777137263	JMJD1C/KDM6B	2	28	703	20973	28/20973
	GO:0072539	T-helper 17 cell differentiation	2/703	2/28	0.241196251569799	0.616568718828631	0.554557777137263	STAT3/ENTPD7	2	28	703	20973	28/20973
	GO:0006476	protein deacetylation	6/703	6/125	0.24250705557525	0.61928565572514	0.557001460120099	MAPT/MTA1/CHD3/SREBF1/TP53/NDN	6	125	703	20973	125/20973
	GO:0043200	response to amino acid	6/703	6/125	0.24250705557525	0.61928565572514	0.557001460120099	NQO1/ASS1/CPS1/GCLC/COL4A6/CCN2	6	125	703	20973	125/20973
	GO:0007009	plasma membrane organization	8/703	8/177	0.243683883768341	0.619728560951934	0.557399820482135	CD9/ANK2/PLEC/CHMP1A/BAIAP2L1/CLU/S100A9/CAV1	8	177	703	20973	177/20973
	GO:0032874	positive regulation of stress-activated MAPK cascade	7/703	7/151	0.243921191357658	0.619728560951934	0.557399820482135	MYD88/CRACR2A/TNIK/MID1/MINK1/CCN2/F2RL1	7	151	703	20973	151/20973
	GO:0009201	ribonucleoside triphosphate biosynthetic process	4/703	4/75	0.243391254420101	0.619728560951934	0.557399820482135	AK4/NUDT2/IMPDH1/NME2	4	75	703	20973	75/20973
	GO:0019226	transmission of nerve impulse	4/703	4/75	0.243391254420101	0.619728560951934	0.557399820482135	TYMP/PLEC/ITGA2/PAFAH1B1	4	75	703	20973	75/20973
	GO:0046513	ceramide biosynthetic process	4/703	4/75	0.243391254420101	0.619728560951934	0.557399820482135	UGT8/AGK/B4GALT4/CCN1	4	75	703	20973	75/20973
	GO:0050435	amyloid-beta metabolic process	4/703	4/75	0.243391254420101	0.619728560951934	0.557399820482135	ABCA2/PSEN2/CLU/APOE	4	75	703	20973	75/20973
	GO:0006775	fat-soluble vitamin metabolic process	3/703	3/51	0.243825616630504	0.619728560951934	0.557399820482135	ALDH1A2/RBP1/CBR1	3	51	703	20973	51/20973
	GO:0008089	anterograde axonal transport	3/703	3/51	0.243825616630504	0.619728560951934	0.557399820482135	KIF1C/MAP1A/SPG7	3	51	703	20973	51/20973
	GO:0030850	prostate gland development	3/703	3/51	0.243825616630504	0.619728560951934	0.557399820482135	ANXA1/FOXA1/CTNNB1	3	51	703	20973	51/20973
	GO:0070266	necroptotic process	3/703	3/51	0.243825616630504	0.619728560951934	0.557399820482135	TP53/CAV1/FAS	3	51	703	20973	51/20973
	GO:0008625	extrinsic apoptotic signaling pathway via death domain receptors	5/703	5/100	0.244547857720613	0.620689303513447	0.558263937072945	TNFRSF10A/BAG3/ITPRIP/DIABLO/THBS1	5	100	703	20973	100/20973
	GO:0060993	kidney morphogenesis	5/703	5/100	0.244547857720613	0.620689303513447	0.558263937072945	ILK/DCHS1/PAX2/LZTS2/CTNNB1	5	100	703	20973	100/20973
	GO:0007611	learning or memory	13/703	13/311	0.246265988221059	0.624415538662025	0.561615408884573	GABRA5/PAK6/MAPT/BCHE/MAPK1/MAP1A/ATAD1/VLDLR/PAFAH1B1/SLC7A11/GATM/APOE/ZNF385A	13	311	703	20973	311/20973
	GO:0051258	protein polymerization	13/703	13/311	0.246265988221059	0.624415538662025	0.561615408884573	MAPT/TUBGCP2/ARHGAP18/HCLS1/TUBB4A/CORO7/UBE2S/DIAPH2/FBXO5/ADD3/BAIAP2L1/TMOD1/SPTBN2	13	311	703	20973	311/20973
	GO:0007254	JNK cascade	9/703	9/204	0.246732389951504	0.624963634790955	0.562108380651767	MYD88/CRACR2A/TNIK/ROR2/MAP2K4/PAFAH1B1/MINK1/CCN2/F2RL1	9	204	703	20973	204/20973
	GO:0051260	protein homooligomerization	9/703	9/204	0.246732389951504	0.624963634790955	0.562108380651767	ALDH1A2/KCTD12/ABCA3/HPRT1/MIF/SIGMAR1/MICU1/PEG10/SHMT1	9	204	703	20973	204/20973
	GO:0030203	glycosaminoglycan metabolic process	6/703	6/126	0.248078636354013	0.62805513866614	0.564888958817151	CD44/B3GALT6/B4GALT4/CEMIP2/B4GAT1/CLN6	6	126	703	20973	126/20973
	GO:0006937	regulation of muscle contraction	8/703	8/178	0.248334843457396	0.628067110415035	0.564899726516278	ANK2/GSTM2/CALM1/PKP2/ITGA2/DSC2/CAV1/CCN2	8	178	703	20973	178/20973
	GO:0060538	skeletal muscle organ development	8/703	8/178	0.248334843457396	0.628067110415035	0.564899726516278	ASS1/PLEC/NIBAN2/MYL6B/CNTFR/MYORG/CTNNB1/CAV1	8	178	703	20973	178/20973
	GO:0000086	G2/M transition of mitotic cell cycle	7/703	7/152	0.248978420530388	0.629057769625336	0.565790750911108	CALM1/FBXO5/HMGA2/UIMC1/AURKB/CCND1/HSPA2	7	152	703	20973	152/20973
	GO:1904064	positive regulation of cation transmembrane transport	7/703	7/152	0.248978420530388	0.629057769625336	0.565790750911108	ANK2/CRACR2A/GSTM2/CALM1/G6PD/THY1/HSPA2	7	152	703	20973	152/20973
	GO:0001701	in utero embryonic development	17/703	17/421	0.249220467197234	0.629350977578454	0.566054469691764	KLF4/AMOT/MAPK1/ZMIZ1/SALL4/SLC39A1/SH3PXD2A/BMPR1A/CCN1/CTNNB1/TP53/NXN/INPP5K/GJA1/SPINT2/KRT19/SLC34A2	17	421	703	20973	421/20973
	GO:0000070	mitotic sister chromatid segregation	8/703	8/179	0.253014388156625	0.631176919174259	0.567696768565563	FBXO5/CHMP1A/CDCA5/BUB1B/SLF2/BUB1/HASPIN/AURKB	8	179	703	20973	179/20973
	GO:0060420	regulation of heart growth	4/703	4/76	0.250721177696937	0.631176919174259	0.567696768565563	G6PD/TBX5/TGFBR3/BMPR1A	4	76	703	20973	76/20973
	GO:0072089	stem cell proliferation	4/703	4/76	0.250721177696937	0.631176919174259	0.567696768565563	FERMT1/HMGA2/GJA1/EPCAM	4	76	703	20973	76/20973
	GO:0009066	aspartate family amino acid metabolic process	3/703	3/52	0.252867716197747	0.631176919174259	0.567696768565563	ASS1/MRI1/ASRGL1	3	52	703	20973	52/20973
	GO:0015804	neutral amino acid transport	3/703	3/52	0.252867716197747	0.631176919174259	0.567696768565563	SLC38A5/SLC43A2/SLC43A1	3	52	703	20973	52/20973
	GO:0038084	vascular endothelial growth factor signaling pathway	3/703	3/52	0.252867716197747	0.631176919174259	0.567696768565563	NRP1/MYO1C/CD63	3	52	703	20973	52/20973
	GO:0043628	ncRNA 3'-end processing	3/703	3/52	0.252867716197747	0.631176919174259	0.567696768565563	ERI2/TUT1/ELAC2	3	52	703	20973	52/20973
	GO:0046622	positive regulation of organ growth	3/703	3/52	0.252867716197747	0.631176919174259	0.567696768565563	TBX5/TGFBR3/BMPR1A	3	52	703	20973	52/20973
	GO:0072523	purine-containing compound catabolic process	3/703	3/52	0.252867716197747	0.631176919174259	0.567696768565563	HPRT1/NUDT1/MLYCD	3	52	703	20973	52/20973
	GO:1902930	regulation of alcohol biosynthetic process	3/703	3/52	0.252867716197747	0.631176919174259	0.567696768565563	ERLIN1/SREBF1/APOE	3	52	703	20973	52/20973
	GO:1903170	negative regulation of calcium ion transmembrane transport	3/703	3/52	0.252867716197747	0.631176919174259	0.567696768565563	GSTM2/CALM1/YWHAE	3	52	703	20973	52/20973
	GO:2000677	regulation of transcription regulatory region DNA binding	3/703	3/52	0.252867716197747	0.631176919174259	0.567696768565563	KLF4/NIBAN2/CTNNB1	3	52	703	20973	52/20973
	GO:0001783	B cell apoptotic process	2/703	2/29	0.253734385125508	0.631176919174259	0.567696768565563	MIF/AURKB	2	29	703	20973	29/20973
	GO:0006379	mRNA cleavage	2/703	2/29	0.253734385125508	0.631176919174259	0.567696768565563	TUT1/FIP1L1	2	29	703	20973	29/20973
	GO:0006582	melanin metabolic process	2/703	2/29	0.253734385125508	0.631176919174259	0.567696768565563	DDT/SLC7A11	2	29	703	20973	29/20973
	GO:0009264	deoxyribonucleotide catabolic process	2/703	2/29	0.253734385125508	0.631176919174259	0.567696768565563	TYMP/DCTPP1	2	29	703	20973	29/20973
	GO:0010829	negative regulation of glucose transmembrane transport	2/703	2/29	0.253734385125508	0.631176919174259	0.567696768565563	ENPP1/INPP5K	2	29	703	20973	29/20973
	GO:0021602	cranial nerve morphogenesis	2/703	2/29	0.253734385125508	0.631176919174259	0.567696768565563	NRP1/PAX2	2	29	703	20973	29/20973
	GO:0030212	hyaluronan metabolic process	2/703	2/29	0.253734385125508	0.631176919174259	0.567696768565563	CD44/CEMIP2	2	29	703	20973	29/20973
	GO:0032369	negative regulation of lipid transport	2/703	2/29	0.253734385125508	0.631176919174259	0.567696768565563	ABCA2/THBS1	2	29	703	20973	29/20973
	GO:0042983	amyloid precursor protein biosynthetic process	2/703	2/29	0.253734385125508	0.631176919174259	0.567696768565563	ABCA2/ITM2C	2	29	703	20973	29/20973
[truncated: 2,996 more rows]
