# Supplementary material for: The domesticated transposon protein L1TD1 associates with its ancestor L1 ORF1p to promote LINE-1 retrotransposition
Source: eLife. 2025 Mar 20;13:RP96850. doi: 10.7554/eLife.96850 (PMC11925450; doi:10.7554/eLife.96850)
Supplement: Figure 3—figure supplement 2—source data 1. [file elife-96850-fig3-figsupp2-data1.xlsx]

## Sheet: 3S2A
L1 ORF1p expression dko ko
KO	DKO
0.8	0.78
1.07	0.89
1.17	0.95
Unpaired t test of L1 ORF1p expression dko ko
Table Analyzed	L1 ORF1p expression dko ko
Column B	DKO
vs.	vs.
Column A	KO
Unpaired t test
P value	0.3123
P value summary	ns
Significantly different (P < 0.05)?	No
One- or two-tailed P value?	Two-tailed
t, df	t=1.155, df=4
How big is the difference?
Mean of column A	1.013
Mean of column B	0.8733
Difference between means (B - A) ± SEM	-0.1400 ± 0.1212
95% confidence interval	-0.4765 to 0.1965
R squared (eta squared)	0.2501
F test to compare variances
F, DFn, Dfd	4.928, 2, 2
P value	0.3374
P value summary	ns
Significantly different (P < 0.05)?	No
Data analyzed
Sample size, column A	3
Sample size, column B	3

## Sheet: 3S2B YY2
YY2 expression
KO	DKO
0.763003	0.16164
0.199656	0.289648
1.42369	1.49638
1.61365	1.40144
Unpaired t test of YY2 expression
Table Analyzed	YY2 expression
Column B	DKO
vs.	vs.
Column A	KO
Unpaired t test
P value	0.746
P value summary	ns
Significantly different (P < 0.05)?	No
One- or two-tailed P value?	Two-tailed
t, df	t=0.3392, df=6
How big is the difference?
Mean of column A	1
Mean of column B	0.8373
Difference between means (B - A) ± SEM	-0.1627 ± 0.4797
95% confidence interval	-1.337 to 1.011
R squared (eta squared)	0.01881
F test to compare variances
F, DFn, Dfd	1.205, 3, 3
P value	0.882
P value summary	ns
Significantly different (P < 0.05)?	No
Data analyzed
Sample size, column A	4
Sample size, column B	4

## Sheet: 3S2B L1TD1
L1TD1 expression copy
KO	DKO
1.03338	0.0805471
0.665313	0.046892
1.30131	0.0678975
Unpaired t test of L1TD1 expression copy
Table Analyzed	L1TD1 expression copy
Column B	DKO
vs.	vs.
Column A	KO
Unpaired t test
P value	0.0072
P value summary	**
Significantly different (P < 0.05)?	Yes
One- or two-tailed P value?	Two-tailed
t, df	t=5.064, df=4
How big is the difference?
Mean of column A	1
Mean of column B	0.06511
Difference between means (B - A) ± SEM	-0.9349 ± 0.1846
95% confidence interval	-1.447 to -0.4223
R squared (eta squared)	0.8651
F test to compare variances
F, DFn, Dfd	352.8, 2, 2
P value	0.0057
P value summary	**
Significantly different (P < 0.05)?	Yes
Data analyzed
Sample size, column A	3
Sample size, column B	3

## Sheet: 3S2B ARMC1
ARMC1 expression copy
KO	DKO
0.72548	1.06585
0.951739	1.54835
1.32278	1.82861
Unpaired t test of ARMC1 expression copy
Table Analyzed	ARMC1 expression copy
Column B	DKO
vs.	vs.
Column A	KO
Unpaired t test
P value	0.1641
P value summary	ns
Significantly different (P < 0.05)?	No
One- or two-tailed P value?	Two-tailed
t, df	t=1.701, df=4
How big is the difference?
Mean of column A	1
Mean of column B	1.481
Difference between means (B - A) ± SEM	0.4809 ± 0.2827
95% confidence interval	-0.3040 to 1.266
R squared (eta squared)	0.4198
F test to compare variances
F, DFn, Dfd	1.637, 2, 2
P value	0.7585
P value summary	ns
Significantly different (P < 0.05)?	No
Data analyzed
Sample size, column A	3
Sample size, column B	3

## Sheet: 3S2C
			baseMean	log2FoldChange	lfcSE	pvalue	padj	geneID	highlight
	7	AluYb8:Alu:SINE	11411.2	1.08851	0.233341	3.08754574211964e-06	0.000666373	AluYb8:Alu:SINE	AluYb8:Alu:SINE
	6	AluYf1:Alu:SINE	3889.14	1.14075	0.344889	0.000941057	0.0473653	AluYf1:Alu:SINE	AluYf1:Alu:SINE
	1	AluYh3	20.4695	3.17584	0.970606	0.00106783	0.0496726	AluYh3	AluYh3
	2	THE1-int:ERVL-MaLR:LTR	15.2761	2.31377	0.688115	0.000772474	0.0460758	THE1-int:ERVL-MaLR:LTR
	3	HERVH48-int:ERV1:LTR	92.5644	1.9451	0.516231	0.000164643	0.0148069	HERVH48-int:ERV1:LTR
	4	LTR81C:Gypsy:LTR	47.346	1.37331	0.301029	5.06598652535322e-06	0.000759335	LTR81C:Gypsy:LTR
	5	LTR7Y:ERV1:LTR	1948.59	1.29416	0.200483	1.0807401513408e-10	7.28959232079372e-08	LTR7Y:ERV1:LTR
	8	MLT2B3:ERVL:LTR	317.637	0.955885	0.202059	2.23717008176927e-06	0.000622508	MLT2B3:ERVL:LTR
	9	LTR7:ERV1:LTR	2671.69	0.908449	0.253454	0.000338019	0.0243771	LTR7:ERV1:LTR
	10	Zaphod3:hAT-Tip100:DNA	213.771	0.855981	0.254921	0.000785576	0.0460758	Zaphod3:hAT-Tip100:DNA
	11	LTR78:ERV1:LTR	562.323	0.553823	0.167362	0.00093589	0.0473653	LTR78:ERV1:LTR
	12	MLT1F2:ERVL-MaLR:LTR	1017.6	0.438774	0.126116	0.000503019	0.032313	MLT1F2:ERVL-MaLR:LTR
	13	MER92B:ERV1:LTR	380.567	-0.525732	0.157877	0.00086844	0.0473653	MER92B:ERV1:LTR
	14	L1MEd	144.549	-0.608568	0.184107	0.000948008	0.0473653	L1MEd
	15	MLT2A2:ERVL:LTR	509.765	-0.612062	0.161074	0.000144769	0.0148069	MLT2A2:ERVL:LTR
	16	LTR12:ERV1:LTR	288.429	-0.731594	0.201994	0.000292495	0.0232103	LTR12:ERV1:LTR
	17	HERV3-int:ERV1:LTR	70.2268	-0.790385	0.240452	0.00101232	0.0487724	HERV3-int:ERV1:LTR
	18	Kanga1b:TcMar-Tc2:DNA	177.639	-0.800737	0.206742	0.000107447	0.0120788	Kanga1b:TcMar-Tc2:DNA
	19	LTR9C:ERV1:LTR	97.9521	-0.802645	0.226145	0.000386339	0.0260585	LTR9C:ERV1:LTR
	20	MER70A:ERVL:LTR	78.1052	-0.841814	0.235131	0.000343339	0.0243771	MER70A:ERVL:LTR
	21	MER11A:ERVK:LTR	534.318	-0.862161	0.203524	2.27375636796843e-05	0.00278845	MER11A:ERVK:LTR
	22	MER52A:ERV1:LTR	194.856	-0.939651	0.202829	3.60879511023312e-06	0.000666373	MER52A:ERV1:LTR
	23	LTR6A:ERV1:LTR	691.964	-1.15155	0.173562	3.24912104049507e-11	4.38306428362785e-08	LTR6A:ERV1:LTR
	24	HERV9NC-int:ERV1:LTR	198.726	-1.1846	0.250737	2.3072952510486e-06	0.000622508	HERV9NC-int:ERV1:LTR
	25	LTR2	55.9186	-1.39196	0.280338	6.86004208880488e-07	0.000308473	LTR2
	26	MER51D:ERV1:LTR	64.5775	-1.49822	0.32472	3.9518054611164e-06	0.000666373	MER51D:ERV1:LTR
	27	HERV15-int:ERV1:LTR	119.082	-1.5296	0.405573	0.0001623	0.0148069	HERV15-int:ERV1:LTR
	28	(CATTC)n:Satellite:Satellite	29.9225	-2.38838	0.645409	0.000215125	0.0181377	(CATTC)n:Satellite:Satellite
	29	(GAATG)n:Satellite:Satellite	11.8833	-3.24892	0.742945	1.22534423585506e-05	0.00165299	(GAATG)n:Satellite:Satellite
