# Supplementary material for: The domesticated transposon protein L1TD1 associates with its ancestor L1 ORF1p to promote LINE-1 retrotransposition
Source: eLife. 2025 Mar 20;13:RP96850. doi: 10.7554/eLife.96850 (PMC11925450; doi:10.7554/eLife.96850)
Supplement: Figure 3—source data 1. [file elife-96850-fig3-data1.xlsx]

## Sheet: 3A
		gene_id	log2FC.DvsC.	log10_P.Value.	log10_adj.P.Val.	group	maj_prot_ID	prot_name	gene_name
	1	ENSG00000174607	6.5519	3.98917	3.13995	up	Q16880	2-hydroxyacylsphingosine 1-beta-galactosyltransferase	UGT8
	2	ENSG00000146802	6.0001	3.85362	3.03401	up	Q9H0V1;H7C268;Q9H0V1-2	Transmembrane protein 168	TMEM168
	3	ENSG00000172936	5.44363	5.36251	4.09474	up	Q99836;A0A0A0MS70;H0Y4G9;Q99836-5;Q99836-6;A0A494C0J8;A0A3F2YP85;A0A0A0MSI9;Q99836-3;Q99836-2	Myeloid differentiation primary response protein MyD88	MYD88
	4	ENSG00000178445	4.98003	5.38091	4.10846	up	P23378	Glycine dehydrogenase (decarboxylating), mitochondrial	GLDC
	5	ENSG00000013297	4.93243	5.25181	4.03527	up	O75508;B4DFI2	Claudin-11;Claudin	CLDN11
	6	ENSG00000172716	4.83183	4.64589	3.6127	up	Q7Z7L1	Schlafen family member 11	SLFN11
	7	ENSG00000184368	4.74203	5.30103	4.06098	up	Q96T17;Q96T17-2;Q96T17-4;Q96T17-5	MAP7 domain-containing protein 2	MAP7D2
	8	ENSG00000146858	4.529	5.45593	4.15552	up	Q96H79	Zinc finger CCCH-type antiviral protein 1-like	ZC3HAV1L
	9	ENSG00000131844	4.438	5.21538	4.00656	up	Q9HCC0;Q9HCC0-2;D6RDF7;D6RD67;D6R9R1	Methylcrotonoyl-CoA carboxylase beta chain, mitochondrial	MCCC2
	10	ENSG00000000003	4.1525	4.97469	3.84903	up	O43657;A0A087WYV6;A0A087WZU5	Tetraspanin-6	TSPAN6
	11	ENSG00000138772	4.0533	5.67572	4.29757	up	P12429;D6RA82;D6RFG5	Annexin A3;Annexin	ANXA3
	12	ENSG00000104689	3.85057	6.05159	4.52871	up	O00220;F8U8C0	Tumor necrosis factor receptor superfamily member 10A	TNFRSF10A
	13	ENSG00000134330	3.82823	7.94692	5.29158	up	Q2TAA2;H7C5G1;C9JE02;Q2TAA2-2	Isoamyl acetate-hydrolyzing esterase 1 homolog	IAH1
	14	ENSG00000116977	3.68787	6.23359	4.62525	up	O00214;O00214-2;B1ANM0;H7BXD8;Q5T3P9;E9PN19;F6V2D4	Galectin-8;Galectin	LGALS8
	15	ENSG00000173193	3.53853	7.21325	5.11295	up	Q460N5;Q460N5-4;Q460N5-1;H7C5R8	Poly [ADP-ribose] polymerase 14	PARP14
	16	ENSG00000186297	3.26283	6.81248	4.96257	up	P31644;P14867;G3V2K2;A0A1B0GV38;G3V2Q9;A0A0U1RRB2;G3V2G8	Gamma-aminobutyric acid receptor subunit alpha-5;Gamma-aminobutyric acid receptor subunit alpha-1	GABRA5;GABRA1
	17	ENSG00000135046	3.12543	7.40012	5.15989	up	P04083;Q5T3N1	Annexin A1;Annexin	ANXA1
	18	ENSG00000136826	2.94343	6.6073	4.84466	up	O43474;O43474-4;O43474-1	Krueppel-like factor 4	KLF4
	19	ENSG00000181019	2.9129	8.01502	5.29158	up	P15559;B4DLR8;P15559-3;P15559-2;H3BNV2;H3BRK3	NAD(P)H dehydrogenase [quinone] 1	NQO1
	20	ENSG00000243279	2.34953	7.13966	5.10403	up	O60831;A6NP52	PRA1 family protein 2	PRAF2
	21	ENSG00000080007	2.17383	8.18642	5.34104	up	Q9NXZ2	Probable ATP-dependent RNA helicase DDX43	DDX43
	22	ENSG00000197702	2.15463	8.78252	5.4389	up	Q9NVD7;E9PS97	Alpha-parvin	PARVA
	23	ENSG00000017483	2.04753	6.68825	4.89279	up	Q8WUX1;C9JJU1;C9JMY2;C9JHH7;C9JWG4;C9JNK4;A0A087X1I6;Q8WUX1-2	Sodium-coupled neutral amino acid transporter 5	SLC38A5
	24	ENSG00000170627	1.97723	6.98297	5.05601	up	Q8WW33;G3V1V4	Gametocyte-specific factor 1	GTSF1
	25	ENSG00000112343	1.90013	7.14569	5.10403	up	O00635	E3 ubiquitin-protein ligase TRIM38	TRIM38
	26	ENSG00000186603	1.86383	6.24642	4.62709	up	Q96IR7	4-hydroxyphenylpyruvate dioxygenase-like protein	HPDL
	27	ENSG00000125148	1.82377	8.51999	5.4389	up	P02795;H3BSP9	Metallothionein-2;Metallothionein	MT2A
	28	ENSG00000205307	1.7818	7.72125	5.23284	up	A0A087WYF9	NA	SAP25
	29	ENSG00000108679	1.773	7.18046	5.11295	up	Q08380	Galectin-3-binding protein	LGALS3BP
	30	ENSG00000170430	1.76973	6.7986	4.95078	up	P16455;B4DEE8	Methylated-DNA--protein-cysteine methyltransferase	MGMT
	31	ENSG00000147381	1.76277	7.09313	5.08302	up	P43358	Melanoma-associated antigen 4	MAGEA4
	32	ENSG00000163191	1.7074	7.18509	5.11295	up	P31949	Protein S100-A11;Protein S100-A11, N-terminally processed	S100A11
	33	ENSG00000180667	1.67543	6.57675	4.82974	up	Q5VVQ6;Q5VVQ6-2	Ubiquitin thioesterase OTU1	YOD1
	34	ENSG00000162433	1.66447	5.60555	4.25727	up	P27144;F8VS11	Adenylate kinase 4, mitochondrial	AK4
	35	ENSG00000008086	1.6387	2.25331	1.84425	up	O76039-2;O76039;A0A096LNR9;A0A1B0GUM4	Cyclin-dependent kinase-like 5	CDKL5
	36	ENSG00000128918	1.6091	2.6892	2.17763	up	O94788;H0YMG7;O94788-3;O94788-2;O94788-4	Retinal dehydrogenase 2	ALDH1A2
	37	ENSG00000177504	1.54083	7.59346	5.22475	up	Q9H322;Q9NNX9;Q9H320;Q9H321;A0A0A0MT50;A0A087X1S4;A0A087WUP2;E7ESE9;J3KNW2;E7EUP4;B5MDK9;Q9H321-2	Variable charge X-linked protein 2;Variable charge X-linked protein 3;Variable charge X-linked protein 1;Variable charge X-linked protein 3B	VCX2;VCX3A;VCX;VCX3B
	38	ENSG00000135406	1.5403	3.79067	2.98712	up	P41219;P41219-2;H7C5W5	Peripherin	PRPH
	39	ENSG00000107949	1.44743	8.57349	5.4389	up	Q9P287-2;Q9P287-4	BRCA2 and CDKN1A-interacting protein	BCCIP
	40	ENSG00000132164	1.44297	5.31966	4.07058	up	P48066	Sodium- and chloride-dependent GABA transporter 3	SLC6A11
	41	ENSG00000022840	1.42737	4.32606	3.38253	up	Q8N5U6;Q8N5U6-2;F5H5P6	RING finger protein 10	RNF10
	42	ENSG00000241476	1.41257	6.75449	4.93554	up	Q16385-2;Q16385	Protein SSX2	SSX2
	43	ENSG00000147251	1.40547	7.10846	5.08991	up	Q5JSL3;A0A0J9YW64;A6NIW2	Dedicator of cytokinesis protein 11	DOCK11
	44	ENSG00000159921	1.40527	6.97881	5.05601	up	Q9Y223;Q9Y223-2;Q9Y223-3;Q9Y223-5;Q9Y223-4	Bifunctional UDP-N-acetylglucosamine 2-epimerase/N-acetylmannosamine kinase;UDP-N-acetylglucosamine 2-epimerase (hydrolyzing);N-acetylmannosamine kinase	GNE
	45	ENSG00000108219	1.38317	5.73283	4.33442	up	Q8NG11;A6NEP9;Q8NG11-2;H7BXY6;Q8NG11-3	Tetraspanin-14;Tetraspanin	TSPAN14
	46	ENSG00000089820	1.38097	7.55596	5.20761	up	P98171;A0A0B4J1X7;E7EQN5;P98171-2;S4R352;S4R314;E9PCM6	Rho GTPase-activating protein 4	ARHGAP4
	47	ENSG00000165029	1.3595	7.00656	5.07366	up	O95477	ATP-binding cassette sub-family A member 1	ABCA1
	48	ENSG00000143194	1.3322	5.05404	3.89933	up	Q96JY0;E9JVC4;Q96JY0-2	Protein maelstrom homolog	MAEL
	49	ENSG00000165806	1.3006	7.67985	5.23284	up	P55210;Q5SVL2;A0A5F9ZHZ6;A0A0A0MRL7;P55210-4;P55210-3;P55210-2	Caspase-7;Caspase-7 subunit p20;Caspase-7 subunit p11	CASP7
	50	ENSG00000101311	1.29903	6.6925	4.89279	up	Q9BQL6;Q9BQL6-4;Q9BQL6-2	Fermitin family homolog 1	FERMT1
	51	ENSG00000064763	1.28297	5.32514	4.07058	up	Q96K12;F8VX60	Fatty acyl-CoA reductase 2	FAR2
	52	ENSG00000178695	1.28053	7.70774	5.23284	up	Q96CX2	BTB/POZ domain-containing protein KCTD12	KCTD12
	53	ENSG00000185686	1.27807	7.35067	5.15989	up	P78395;E7EW99;A0A0G2JRX7;H7C2P3;E7EMH2	Melanoma antigen preferentially expressed in tumors	PRAME
	54	ENSG00000123836	1.27223	7.2161	5.11295	up	O60825;O60825-2	6-phosphofructo-2-kinase/fructose-2,6-bisphosphatase 2;6-phosphofructo-2-kinase;Fructose-2,6-bisphosphatase	PFKFB2
	55	ENSG00000108010	1.26513	5.70774	4.31876	up	O76003	Glutaredoxin-3	GLRX3
	56	ENSG00000104325	1.2548	6.92445	5.02826	up	Q16698;Q16698-2;E5RJG7;E5RFV2;E5RJD2	2,4-dienoyl-CoA reductase, mitochondrial	DECR1
	57	ENSG00000107651	1.21537	7.01818	5.0804	up	Q9Y6Y8;Q9Y6Y8-2	SEC23-interacting protein	SEC23IP
	58	ENSG00000146386	1.2	2.84819	2.29616	up	Q9P1F3	Costars family protein ABRACL	ABRACL
	59	ENSG00000088448	1.19697	3.16039	2.52098	up	Q9NXR5;S4R3R2;Q8IUW1;Q9NXR5-2	Ankyrin repeat domain-containing protein 10	ANKRD10
	60	ENSG00000167972	1.19583	4.85699	3.76439	up	Q99758;H0Y3H2	ATP-binding cassette sub-family A member 3	ABCA3
	61	ENSG00000010278	1.19123	5.78252	4.35556	up	P21926;A6NNI4;A0A2R8Y478;G8JLH6	CD9 antigen;Tetraspanin	CD9
	62	ENSG00000151893	1.18383	7.12901	5.09963	up	Q86Y37;Q86Y37-4;Q86Y37-2	CDK2-associated and cullin domain-containing protein 1	CACUL1
	63	ENSG00000140600	1.1828	5.32239	4.07058	up	Q99963;Q99963-4;Q99963-3;Q99963-2	Endophilin-A3	SH3GL3
	64	ENSG00000196865	1.17827	7.92445	5.29158	up	Q8NBF2;Q8NBF2-2	NHL repeat-containing protein 2	NHLRC2
	65	ENSG00000148908	1.16883	6.47496	4.77989	up	O43665;O43665-2;O43665-1	Regulator of G-protein signaling 10	RGS10
	66	ENSG00000165832	1.16217	7.38091	5.15989	up	Q8WWH5	Probable tRNA pseudouridine synthase 1	TRUB1
	67	ENSG00000187189	1.15683	7.03339	5.0804	up	Q9UJ04	Testis-specific Y-encoded-like protein 4	TSPYL4
	68	ENSG00000196998	1.1503	6.5867	4.83565	up	Q9Y484;H0Y329;A0A0U1RR06;C9JYH8;G8JLI5;A0A0U1RQM7;A0A0U1RQG6;Q9Y484-2;Q9Y484-3;C9J0A8;H7C5B4;C9JBX7;C9J5L0;C9JUS5;A0A0U1RRJ9;C9J7Q8;A0A0U1RQR1;C9J471	WD repeat domain phosphoinositide-interacting protein 4	WDR45
	69	ENSG00000175793	1.14973	6.55284	4.82974	up	P31947;P31947-2	14-3-3 protein sigma	SFN
	70	ENSG00000214435	1.14837	6.27737	4.64397	up	Q9HBK9;A0A087WVD4;Q9HBK9-2	Arsenite methyltransferase	AS3MT
	71	ENSG00000165660	1.14227	7.79317	5.23284	up	Q15018	BRISC complex subunit Abro1	FAM175B
	72	ENSG00000124260	1.13097	5.31605	4.06854	up	P43363	Melanoma-associated antigen 10	MAGEA10
	73	ENSG00000132963	1.12373	5.76955	4.34775	up	Q9Y244;A0A1W2PS02	Proteasome maturation protein	POMP
	74	ENSG00000078070	1.1193	5.91721	4.44009	up	Q96RQ3;F5GYT8;E9PHF7;E9PG35;G5E9X5	Methylcrotonoyl-CoA carboxylase subunit alpha, mitochondrial	MCCC1
	75	ENSG00000117525	1.0815	5.69897	4.31515	up	P13726;P13726-2	Tissue factor	F3
	76	ENSG00000198681	1.07917	6.02919	4.52143	up	P43355	Melanoma-associated antigen 1	MAGEA1
	77	ENSG00000165868	1.07597	6.57025	4.82974	up	O43301;A0A1B0GTF3	Heat shock 70 kDa protein 12A	HSPA12A
	78	ENSG00000158716	1.0646	7.18376	5.11295	up	Q9BVJ7	Dual specificity protein phosphatase 23	DUSP23
	79	ENSG00000164120	1.06127	4.74473	3.68873	up	P15428;P15428-5;E9PD69;E9PBZ2;P15428-4;P15428-2	15-hydroxyprostaglandin dehydrogenase [NAD(+)]	HPGD
	80	ENSG00000198825	1.05853	6.767	4.93554	up	Q9Y2H2;A0A3B3ITL0;A0A3B3IRJ9;Q9Y2H2-4	Phosphatidylinositide phosphatase SAC2	INPP5F
	81	ENSG00000131018	1.03527	1.99439	1.64009	up	Q8NF91;Q8NF91-4;A0A0C4DG40;Q8NF91-8;Q8NF91-2	Nesprin-1	SYNE1
	82	ENSG00000188620	1.0311	5.33913	4.07988	up	A6NHT5	Homeobox protein HMX3	HMX3
	83	ENSG00000145592	1.03043	3.09652	2.47734	up	P61927	60S ribosomal protein L37	RPL37
	84	ENSG00000203791	1.0289	6.49757	4.7986	up	A0A494BZY7;Q5JPI9;M0QZ67;G3V238;H3BQF6	Protein-lysine N-methyltransferase METTL10	METTL10
	85	ENSG00000150456	1.02633	5.72816	4.33348	up	Q8WVE0	Protein-lysine N-methyltransferase N6AMT2	N6AMT2
	86	ENSG00000165650	1.02477	6.59346	4.83863	up	Q8NEN9	PDZ domain-containing protein 8	PDZD8
	87	ENSG00000100784	1.0246	5.35952	4.09313	up	O75582;O75582-3	Ribosomal protein S6 kinase alpha-5	RPS6KA5
	88	ENSG00000158639	1.02383	5.4318	4.13847	up	Q96GU1;Q96GU1-2;Q5JUL1	P antigen family member 5	PAGE5
	89	ENSG00000151929	1.0204	7.39254	5.15989	up	O95817;C9JFK9	BAG family molecular chaperone regulator 3	BAG3
	90	ENSG00000187134	1.02033	5.30627	4.06298	up	Q04828;P52895;S4R3P0;H0Y804;B4DK69;P42330;P17516;A6NHU4;S4R3D5;S4R3Z2;A0A0A0MSS8;P52895-2	Aldo-keto reductase family 1 member C1;Aldo-keto reductase family 1 member C2;Aldo-keto reductase family 1 member C3;Aldo-keto reductase family 1 member C4	AKR1C1;AKR1C2;AKR1C3;AKR1C4
	91	ENSG00000196678	1.0151	5.86646	4.4045	up	A8K979;A8K979-2	ERI1 exoribonuclease 2	ERI2
	92	ENSG00000197771	1.01023	7.35655	5.15989	up	Q9BTE3;Q9BTE3-2;Q9BTE3-3	Mini-chromosome maintenance complex-binding protein	MCMBP
	93	ENSG00000130707	1.00833	5.52871	4.20343	up	P00966;Q5T6L6;Q5T6L5	Argininosuccinate synthase	ASS1
	94	ENSG00000151640	1.00613	6.21824	4.61798	up	O14531;Q5T0Q6	Dihydropyrimidinase-related protein 4	DPYSL4
	95	ENSG00000198690	1.00427	1.20303	1.00172	unchanged	Q9Y2M0;A0A590UJ38;A0A590UK78;H3BQ24;A0A590UJL5;A0A590UKC0;Q9Y2M0-2	Fanconi-associated nuclease 1	FAN1
	96	ENSG00000119979	1.004	5.20691	4.00043	up	Q8TCE6;Q6NSW5;Q8TCE6-2;A0A3B3IRE4	Protein FAM45A;Protein FAM45B	FAM45A;FAM45B
	97	ENSG00000160789	1.00297	5.02733	3.88494	up	P02545;P02545-6;P02545-3;P02545-2;P02545-5;P02545-4;Q3BDU5;Q5TCI8	Prelamin-A/C;Lamin-A/C	LMNA
	98	ENSG00000119965	0.997233	6.55752	4.82974	up	Q9H8K7	Uncharacterized protein C10orf88	C10orf88
	99	ENSG00000068383	0.9971	6.1831	4.60033	up	Q14642;Q5T1B5	Type I inositol 1,4,5-trisphosphate 5-phosphatase	INPP5A
	100	ENSG00000140264	0.993767	6.09745	4.55129	up	P84101;P84101-4;F8WBN3;B9A031;C9JQZ0;B8ZZY7;F8WBV6;P84101-3;P84101-2	Small EDRK-rich factor 2	SERF2
	101	ENSG00000099977	0.993567	5.74958	4.33536	up	P30046;A6NHG4;B5MC82;P30046-2;J3KQ18	D-dopachrome decarboxylase;D-dopachrome decarboxylase-like protein	DDT;DDTL
	102	ENSG00000102144	0.991967	5.92445	4.44733	up	P00558;P00558-2	Phosphoglycerate kinase 1	PGK1
	103	ENSG00000162493	0.987633	6.88941	5.01502	up	E7ETC6;H0YA72;Q86YL7-5;Q86YL7-6;Q86YL7;Q86YL7-4;Q86YL7-3	Podoplanin	PDPN
	104	ENSG00000102309	0.986067	5.73283	4.33442	up	Q9Y237;Q9Y237-2	Peptidyl-prolyl cis-trans isomerase NIMA-interacting 4	PIN4
	105	ENSG00000166965	0.968	5.65956	4.28904	up	A6NED2;G3V2I3	RCC1 domain-containing protein 1	RCCD1
	106	ENSG00000165669	0.963567	5.98716	4.49894	up	Q9H8W3;F2Z2Y3	Protein FAM204A	FAM204A
	107	ENSG00000185247	0.9632	5.99568	4.50446	up	P43364;G5E962;P43364-2;C9J2X2	Melanoma-associated antigen 11	MAGEA11
	108	ENSG00000107669	0.9632	6.68825	4.89279	up	F5GXE4;B4E107;O95260-2;O95260;B4DK25;H0Y5C2	Arginyl-tRNA--protein transferase 1	ATE1
	109	ENSG00000187514	0.962233	3.46772	2.74916	up	P06454;P06454-2;B8ZZQ6;B8ZZA1;B8ZZW7;H7C2N1	Prothymosin alpha;Prothymosin alpha, N-terminally processed;Thymosin alpha-1	PTMA
	110	ENSG00000123104	0.9593	6.4045	4.73283	up	Q14571	Inositol 1,4,5-trisphosphate receptor type 2	ITPR2
	111	ENSG00000165349	0.958333	5.73283	4.33442	up	Q8WY07	Cationic amino acid transporter 3	SLC7A3
	112	ENSG00000132622	0.954033	4.18046	3.27749	up	Q96MM6;Q5JX83	Heat shock 70 kDa protein 12B	HSPA12B
	113	ENSG00000021826	0.953833	5.37263	4.10237	up	P31327;P31327-2;P31327-3	Carbamoyl-phosphate synthase [ammonia], mitochondrial	CPS1
	114	ENSG00000167363	0.9527	5.8729	4.40782	up	Q9H479	Fructosamine-3-kinase	FN3K
	115	ENSG00000120008	0.9515	6.88606	5.01502	up	Q9BZH6	WD repeat-containing protein 11	WDR11
	116	ENSG00000154822	0.9453	6.6925	4.89279	up	Q9UPR0;H7C276;Q9UPR0-2;Q9UPR0-3	Inactive phospholipase C-like protein 2;Phosphoinositide phospholipase C	PLCL2
	117	ENSG00000165813	0.943433	6.95861	5.04818	up	Q7Z3E2	Coiled-coil domain-containing protein 186	CCDC186
	118	ENSG00000129158	0.9399	4.5784	3.5671	up	Q9UGK8;G3V1B4;Q9UGK8-2;H0YEL8	Secretion-regulating guanine nucleotide exchange factor	SERGEF
	119	ENSG00000140464	0.938033	7.04048	5.0804	up	P29590;P29590-5;P29590-4;P29590-3;P29590-8;P29590-9;P29590-14;P29590-10	Protein PML	PML
	120	ENSG00000132109	0.9373	6.12552	4.56543	up	P19474;P19474-2	E3 ubiquitin-protein ligase TRIM21	TRIM21
	121	ENSG00000099250	0.9307	6.39147	4.72125	up	O14786;E9PEP6;E7EX60;Q5T7F0;O14786-3;O14786-2;Q5JWQ4;Q5JWQ6	Neuropilin-1	NRP1
	122	ENSG00000150760	0.9291	6.16178	4.59007	up	Q14185;A0A096LNH6	Dedicator of cytokinesis protein 1	DOCK1
	123	ENSG00000188026	0.924953	1.46826	1.21909	unchanged	Q5EBL4;A0A1B0GVV3;Q5EBL4-2;Q5EBL4-3	RILP-like protein 1	RILPL1
	124	ENSG00000137843	0.923467	5.59688	4.25337	up	Q9NQU5;Q9NQU5-2	Serine/threonine-protein kinase PAK 6	PAK6
	125	ENSG00000026508	0.9227	5.86328	4.4045	up	P16070;P16070-18;H0Y2P0;P16070-8;P16070-12;P16070-3;P16070-6;P16070-4;P16070-17;P16070-5;P16070-7;P16070-10;P16070-11;P16070-13;P16070-14;P16070-16;H0YD13;H0YE40	CD44 antigen	CD44
	126	ENSG00000198848	0.917033	5.76195	4.3439	up	P23141;P23141-2;P23141-3	Liver carboxylesterase 1	CES1
	127	ENSG00000145362	0.908667	7.02091	5.0804	up	A0A5F9ZI18;A0A5F9ZHC9;A0A5F9ZH70;A0A5F9ZHE4;D6RHE1;A0A5F9ZGZ1;A0A5F9ZH30;A0A5F9ZHG3;A0A5F9ZGS5;Q01484;A0A5F9ZHA1;A0A5F9ZH39;A0A5F9ZHL9;A0A5F9ZHL5;A0A5F9ZHR2;A0A5F9ZHJ6;A0A5F9ZHJ4;A0A5F9ZI73;A0A5F9ZGX8;A0A5F9ZI56;A0A5F9ZGY1;A0A5F9ZHQ5;A0A5F9ZI69;A0A5F9ZI81;A0A5F9ZGX3;Q01484-5;A0A5F9ZH38;A0A5F9ZHR8;A0A5F9ZHD2;A0A5F9ZGY3;Q01484-2;I6L894;A0A5F9ZI40;A0A5F9ZHN5;A0A5F9ZH19;A0A5F9ZHS1;A0A5F9ZH17;A0A5F9ZI…	Ankyrin-2	ANK2
	128	ENSG00000166394	0.904767	4.6968	3.65051	up	Q6BCY4;E9PIV9;E9PMI2;Q6BCY4-2	NADH-cytochrome b5 reductase 2	CYB5R2
	129	ENSG00000129514	0.9046	3.4396	2.7298	up	P55317;P55317-2	Hepatocyte nuclear factor 3-alpha	FOXA1
	130	ENSG00000025708	0.8971	5.78781	4.35655	up	P19971;C9JGI3;P19971-2;A0A494C0L6	Thymidine phosphorylase	TYMP
	131	ENSG00000186868	0.896233	7.18442	5.11295	up	P10636-5;P10636-2;P10636-4;P10636-8;P10636;P10636-3;P10636-6;P10636-7;I3L170;A0A0G2JQJ7;A0A0G2JPD5;A0A0G2JS76;A0A0G2JMX7;P10636-9	Microtubule-associated protein tau;Microtubule-associated protein	MAPT
	132	ENSG00000178982	0.892567	4.93554	3.81885	up	Q9UBQ5;Q9UBQ5-2;K7ERF1;A0A087WVB9;K7ES31;K7EQM4	Eukaryotic translation initiation factor 3 subunit K	EIF3K
	133	ENSG00000107938	0.888833	7.14569	5.10403	up	Q3B7T1;Q3B7T1-5;Q3B7T1-3	Erythroid differentiation-related factor 1	EDRF1
	134	ENSG00000183208	0.885667	5.41454	4.12263	up	Q6ZNW5;H0YN11;A0A286YET3	GDP-D-glucose phosphorylase 1	GDPGP1
	135	ENSG00000215440	0.884633	5.53313	4.20761	up	Q8NDH3;Q8NDH3-5;Q8NDH3-4	Probable aminopeptidase NPEPL1	NPEPL1
	136	ENSG00000114200	0.882967	6.55129	4.82974	up	P06276;F8WF14;F8WEX7	Cholinesterase;Carboxylic ester hydrolase	BCHE
	137	ENSG00000130038	0.8814	6.25414	4.62893	up	Q9BSW2-2	EF-hand calcium-binding domain-containing protein 4B	CRACR2A
	138	ENSG00000162722	0.875533	5.59176	4.25104	up	Q8NG06	E3 ubiquitin-protein ligase TRIM58	TRIM58
	139	ENSG00000151532	0.874733	4.30892	3.37145	up	Q96AJ9;Q96AJ9-1	Vesicle transport through interaction with t-SNAREs homolog 1A	VTI1A
	140	ENSG00000086205	0.873433	3.67217	2.90371	up	Q04609;Q04609-6;Q04609-9;Q04609-8;Q04609-7;Q04609-10	Glutamate carboxypeptidase 2	FOLH1
	141	ENSG00000147065	0.873267	6.25181	4.62893	up	P26038	Moesin	MSN
	142	ENSG00000130640	0.8674	6.46092	4.77469	up	Q9BSJ2;Q9BSJ2-4;F2Z2B9;Q9BSJ2-3	Gamma-tubulin complex component 2	TUBGCP2
	143	NA	0.8626	6.04383	4.52724	up	Q9UKH3;Q69384;P61570;O71037;Q902F8;Q902F9;P61565;P61567;P63135	Endogenous retrovirus group K member 9 Env polyprotein;Surface protein;Transmembrane protein;Endogenous retrovirus group K member 6 Env polyprotein;Surface protein;Transmembrane protein;Endogenous retrovirus group K member 25 Env polyprotein;Surface protein;Transmembrane protein;Endogenous retrovirus group K member 19 Env polyprotein;Surface protein;Transmembrane protein;Endogenous retrovirus gro…	ERVK-9;ERVK-6;ERVK-25;ERVK-19;ERVK-8;HERVK_113;ERVK-21;ERVK-7
	144	ENSG00000107679	0.861833	6.06349	4.53313	up	Q9HB21;Q9HB21-2;Q5RGS4	Pleckstrin homology domain-containing family A member 1	PLEKHA1
	145	ENSG00000122515	0.859067	4.71897	3.66685	up	Q8NF64;E7EWM3;A0A087X127;Q8NF64-3;Q8NF64-2	Zinc finger MIZ domain-containing protein 2	ZMIZ2
	146	ENSG00000135334	0.854333	5.38616	4.11126	up	Q53H80	Akirin-2	AKIRIN2
	147	ENSG00000158457	0.8465	5.8729	4.40782	up	Q86UF1	Tetraspanin-33	TSPAN33
	148	ENSG00000107581	0.846433	6.16494	4.59007	up	Q14152;Q14152-2	Eukaryotic translation initiation factor 3 subunit A	EIF3A
	149	ENSG00000114115	0.833333	5.15304	3.96132	up	A0A0A0MQT0;P09455;P09455-3;A0A0A0MTB9;H0YAK8;P09455-2	Retinol-binding protein 1	RBP1
	150	ENSG00000172037	0.832267	6.62709	4.85387	up	P55268	Laminin subunit beta-2	LAMB2
	151	ENSG00000106853	0.831667	6.8729	5.00745	up	Q14914;F2Z3J9;Q14914-2	Prostaglandin reductase 1	PTGR1
	152	ENSG00000141522	0.830433	5.70333	4.31785	up	P52565;J3QQX2;J3KTF8;J3KRE2;J3KRY1;P52565-2	Rho GDP-dissociation inhibitor 1	ARHGDIA
	153	ENSG00000160293	0.830267	5.61618	4.26201	up	P52735;P52735-3;P52735-2	Guanine nucleotide exchange factor VAV2	VAV2
	154	ENSG00000288722	0.828933	6.03058	4.52143	up	P23610	Factor VIII intron 22 protein	F8A1
	155	ENSG00000120549	0.821933	6.38091	4.71444	up	Q5T5P2;Q5T5P2-7;Q5T5P2-10;Q5T5P2-3;Q5T5P2-8;Q5T5P2-6;Q5T5P2-9;Q5T5P2-2;Q5T5P2-4	Sickle tail protein homolog	KIAA1217
	156	ENSG00000107331	0.8219	5.10347	3.92827	up	Q9BZC7;Q9BZC7-3;J3QSS3;A0A087WXK5	ATP-binding cassette sub-family A member 2	ABCA2
	157	ENSG00000147813	0.817733	5.27572	4.04191	up	Q6XQN6;Q6XQN6-3;Q6XQN6-2;G5E977;C9J8U2	Nicotinate phosphoribosyltransferase	NAPRT
	158	ENSG00000100360	0.8147	5.25649	4.03527	up	Q9BW83;Q9BW83-2;H0Y6C7;F5GZ09	Intraflagellar transport protein 27 homolog	IFT27
	159	ENSG00000126790	0.8145	4.86012	3.76439	up	Q96EM0;D6RC46;E9PKK7	Trans-3-hydroxy-L-proline dehydratase	L3HYPDH
	160	ENSG00000198258	0.809967	5.35853	4.09313	up	Q9BZL1	Ubiquitin-like protein 5	UBL5
	161	ENSG00000187164	0.8094	6.00966	4.51004	up	A0MZ66;A0MZ66-3;A0MZ66-4;A0MZ66-5;A0MZ66-6;A0MZ66-8;A0MZ66-2	Shootin-1	KIAA1598
	162	ENSG00000083845	0.807067	4.60906	3.58685	up	P46782;M0R0F0;M0R0R2;M0QZN2	40S ribosomal protein S5;40S ribosomal protein S5, N-terminally processed	RPS5
	163	ENSG00000184675	0.8034	5.56543	4.23508	up	Q5JTC6;Q5JTC6-2	APC membrane recruitment protein 1	AMER1
	164	ENSG00000181191	0.802	4.42597	3.45202	up	Q8NG27;Q8NG27-2;Q8NG27-3	E3 ubiquitin-protein ligase Praja-1	PJA1
	165	ENSG00000158710	0.7999	4.9431	3.82392	up	P37802;P37802-2;X6RJP6	Transgelin-2	TAGLN2
	166	ENSG00000175029	0.7986	5.88273	4.41341	up	P56545;P56545-2;P56545-3	C-terminal-binding protein 2	CTBP2
	167	ENSG00000126016	0.7895	5.66959	4.29328	up	Q4VCS5;E7ERM3;Q4VCS5-2;A6NP16	Angiomotin	AMOT
	168	ENSG00000163344	0.785533	3.7948	2.98981	up	Q15126	Phosphomevalonate kinase	PMVK
	169	ENSG00000168610	0.785433	6.22988	4.62525	up	P40763;P40763-2;P40763-3;G8JLH9	Signal transducer and activator of transcription 3;Signal transducer and activator of transcription	STAT3
	170	ENSG00000169299	0.7837	5.09044	3.92168	up	Q96G03	Phosphoglucomutase-2	PGM2
	171	ENSG00000146376	0.783667	5.16368	3.96872	up	Q8N392;Q8N392-2	Rho GTPase-activating protein 18	ARHGAP18
	172	ENSG00000154217	0.782367	4.383	3.42318	up	Q9UKF7;Q9UKF7-2;E7EU35;A0A0C4DGP0	Cytoplasmic phosphatidylinositol transfer protein 1	PITPNC1
	173	ENSG00000151553	0.7792	6.04431	4.52724	up	Q5W0V3;Q5W0V3-2	Protein FAM160B1	FAM160B1
	174	ENSG00000180353	0.7773	5.36856	4.09963	up	P14317;E7EVW7	Hematopoietic lineage cell-specific protein	HCLS1
	175	ENSG00000198931	0.7765	5.8962	4.42366	up	P07741;H3BQF1;P07741-2;H3BQZ9;H3BQB1	Adenine phosphoribosyltransferase	APRT
	176	ENSG00000188419	0.774367	5.28067	4.04528	up	P24386	Rab proteins geranylgeranyltransferase component A 1	CHM
	177	ENSG00000197712	0.773367	5.64207	4.27984	up	Q8IWE2;Q8IWE2-2	Protein NOXP20	FAM114A1
	178	ENSG00000124570	0.7716	5.66354	4.29073	up	P35237;A0A024QZX5;A0A087X1N8;A0A2R8YD12;A0A2R8Y6A7	Serpin B6	SERPINB6
	179	ENSG00000099256	0.769367	5.33536	4.07727	up	Q9NRG1;Q9NRG1-2;Q9NRG1-3	Phosphoribosyltransferase domain-containing protein 1	PRTFDC1
	180	ENSG00000151923	0.7689	5.11691	3.9396	up	Q01085-2;Q01085;E7ETJ9	Nucleolysin TIAR	TIAL1
	181	ENSG00000090013	0.767933	6.22475	4.62342	up	P30043;A0A2R8YEP4;M0R192	Flavin reductase (NADPH)	BLVRB
	182	ENSG00000147164	0.762267	5.17653	3.97787	up	Q9UMY4;A0A087X0R6;Q9UMY4-3;Q9UMY4-1	Sorting nexin-12	SNX12
	183	ENSG00000089289	0.757567	4.8962	3.79359	up	P78318	Immunoglobulin-binding protein 1	IGBP1
	184	ENSG00000196177	0.757	4.56384	3.55664	up	P45954;P45954-2	Short/branched chain specific acyl-CoA dehydrogenase, mitochondrial	ACADSB
	185	ENSG00000145247	0.753333	5.46471	4.16178	up	Q56VL3	OCIA domain-containing protein 2	OCIAD2
	186	ENSG00000167173	0.7532	6.23136	4.62525	up	Q6ZRI6;H3BMJ2;Q6ZRI6-2	Uncharacterized protein C15orf39	C15orf39
	187	ENSG00000037757	0.751533	5.74715	4.33442	up	Q9BV20;Q9BV20-2	Methylthioribose-1-phosphate isomerase	MRI1
	188	NA	0.743967	4.56703	3.55857	up	P63145	Endogenous retrovirus group K member 24 Gag polyprotein	ERVK-24
	189	ENSG00000116120	0.742167	6.12494	4.56543	up	Q9NSD9;Q9NSD9-2	Phenylalanine--tRNA ligase beta subunit	FARSB
	190	ENSG00000099204	0.7405	5.49485	4.18046	up	O14639;F8W8M4;A0A0A0MRL6;A0A3B3IS55;O14639-2;O14639-5;J3QSX6;O14639-4;O14639-3;O14639-6;A0A494C1P1;A0A494C1G0	Actin-binding LIM protein 1	ABLIM1
	191	ENSG00000109475	0.737833	2.37953	1.94395	up	P49207	60S ribosomal protein L34	RPL34
	192	ENSG00000165672	0.737133	3.53743	2.80174	up	P30048;P30048-2	Thioredoxin-dependent peroxide reductase, mitochondrial	PRDX3
	193	ENSG00000100129	0.735467	6.19723	4.6073	up	Q9Y262;B0QY89;Q9Y262-2;B0QY90	Eukaryotic translation initiation factor 3 subunit L	EIF3L
	194	ENSG00000133943	0.734767	5.76447	4.3439	up	Q7Z3D6-2;Q7Z3D6;Q7Z3D6-3;Q7Z3D6-4;H0YB09;H0YB62;Q7Z3D6-5;A0A0C4DGD4	UPF0317 protein C14orf159, mitochondrial	C14orf159
	195	ENSG00000197172	0.730133	4.60033	3.58031	up	P43360;E7ETG4	Melanoma-associated antigen 6	MAGEA6
	196	ENSG00000104833	0.728333	3.3626	2.6718	up	P04350	Tubulin beta-4A chain	TUBB4A
	197	ENSG00000152556	0.723867	6.56543	4.82974	up	P08237;P08237-2;A0A2R8Y891;P08237-3;F8VZI0	ATP-dependent 6-phosphofructokinase, muscle type	PFKM
	198	ENSG00000108001	0.7238	6.30803	4.66354	up	Q9H4W6;Q9H4W6-2;Q9UH73;E5RFQ1;Q9HAK2;Q9UH73-2	Transcription factor COE3;Transcription factor COE1;Transcription factor COE2	EBF3;EBF1;EBF2
	199	ENSG00000034053	0.7223	5.9431	4.45842	up	Q99767;Q99767-2	Amyloid beta A4 precursor protein-binding family A member 2	APBA2
	200	ENSG00000164978	0.7207	4.51713	3.52151	up	P50583	Bis(5-nucleosyl)-tetraphosphatase [asymmetrical]	NUDT2
	201	ENSG00000162174	0.720167	5.09259	3.92168	up	Q7L266;Q7L266-2	Isoaspartyl peptidase/L-asparaginase;Isoaspartyl peptidase/L-asparaginase alpha chain;Isoaspartyl peptidase/L-asparaginase beta chain	ASRGL1
	202	ENSG00000213626	0.719233	5.07883	3.91587	up	Q53QV2;B5MBX5;B5MCP4	Protein LBH	LBH
	203	ENSG00000213523	0.7168	4.12784	3.23896	up	Q9HD15	Steroid receptor RNA activator 1	SRA1
	204	ENSG00000162927	0.7146	3.84416	3.02751	up	Q3MIT2	Putative tRNA pseudouridine synthase Pus10	PUS10
	205	ENSG00000176731	0.713867	4.15864	3.26171	up	Q8N0T1;A0A087WWE7	Uncharacterized protein C8orf59	C8orf59
	206	ENSG00000101935	0.7134	5.57187	4.23882	up	Q9Y4X0;Q9Y4X0-4;Q9Y4X0-3	AMME syndrome candidate gene 1 protein	AMMECR1
	207	ENSG00000178802	0.7129	6.25727	4.63078	up	P34949;H3BPB8;P34949-2;F5GX71;H3BP57;H3BMZ9;H3BUZ9;H3BT48;H3BPP3;H3BPU7;H3BT46;H3BPM5	Mannose-6-phosphate isomerase	MPI
	208	ENSG00000137486	0.712367	5.16813	3.97108	up	P49407;P49407-2;E9PM35	Beta-arrestin-1	ARRB1
	209	ENSG00000162076	0.7105	5.73283	4.33442	up	Q96CP2;I3L1Y9;I3L4I0	FLYWCH family member 2	FLYWCH2
	210	ENSG00000213366	0.708133	5.73755	4.33442	up	P28161;E9PHN6;F6XZQ7;P28161-2;E9PHN7;E9PLF1	Glutathione S-transferase Mu 2	GSTM2
	211	ENSG00000230989	0.7043	3.96083	3.11793	up	O75506	Heat shock factor-binding protein 1	HSBP1
	212	ENSG00000198668	0.702933	5.39903	4.11634	up	P0DP25;P0DP24;P0DP23;A0A590UK56;E7EMB3;Q96HY3;G3V361;A0A590UJI2	NA	CALM2;CALM1
	213	ENSG00000149016	0.702467	5.83268	4.38616	up	Q9H6E5;F5H0R1	Speckle targeted PIP5K1A-regulated poly(A) polymerase	TUT1
	214	ENSG00000262246	0.7022	6.07988	4.5391	up	P57737-3;A0A0A6YYL4	Coronin-7;Coronin	CORO7;CORO7-PAM16
	215	ENSG00000141560	0.701633	5.6038	4.25727	up	Q9HA64;I3L139;I3L407;I3L3W5	Ketosamine-3-kinase	FN3KRP
	216	ENSG00000169756	0.698067	5.78781	4.35556	up	P48059;P48059-4;P48059-5;P48059-3;P48059-2;A0A0J9YXC7;A0A0M3HER1	LIM and senescent cell antigen-like-containing domain protein 1	LIMS1
	217	ENSG00000145216	0.697833	4.96257	3.83935	up	A0A0B4J203	NA	FIP1L1
	218	ENSG00000131725	0.695133	5.03339	3.88831	up	Q5JSH3;Q5JSH3-2;H7BY83;Q5JSH3-4	WD repeat-containing protein 44	WDR44
	219	ENSG00000108106	0.694367	4.80967	3.73483	up	Q16763;K7EPJ1	Ubiquitin-conjugating enzyme E2 S	UBE2S
	220	ENSG00000147202	0.693233	3.82397	3.01209	up	O60879;A6NML8;K4DI95;C9J6U3;O60879-2;O60879-3	Protein diaphanous homolog 2	DIAPH2
	221	ENSG00000001084	0.692367	4.42366	3.45012	up	P48506;B4E2I4;A0A2R8YEL6;E1CEI4;A0A0C4DGB2	Glutamate--cysteine ligase catalytic subunit	GCLC
	222	ENSG00000100030	0.6923	6.05552	4.53018	up	P28482;P28482-2	Mitogen-activated protein kinase 1	MAPK1
	223	ENSG00000170581	0.6902	5.1891	3.98603	up	P52630;A0A494C164;P52630-4	Signal transducer and activator of transcription 2	STAT2
	224	ENSG00000170043	0.690067	4.82681	3.74429	up	Q9Y5R8;I3L3S0	Trafficking protein particle complex subunit 1	TRAPPC1
	225	ENSG00000006625	0.689867	4.97469	3.84903	up	O75223;M0QZK8;O75223-3;B8ZZK2	Gamma-glutamylcyclotransferase	GGCT
	226	ENSG00000101888	0.689667	5.21042	4.00261	up	Q9NPJ8-3	NTF2-related export protein 2	NXT2
	227	ENSG00000100239	0.6883	5.04528	3.89764	up	O75170-3;O75170;O75170-2;O75170-6;O75170-4;O75170-5;T1ECW5	Serine/threonine-protein phosphatase 6 regulatory subunit 2	PPP6R2
	228	ENSG00000106348	0.6873	5.68825	4.30715	up	P20839;P20839-6;P20839-7;A0A3B3IRL5;C9J381;P20839-2;P20839-4;P20839-3;P20839-5	Inosine-5-monophosphate dehydrogenase 1;Inosine-5-monophosphate dehydrogenase	IMPDH1
	229	ENSG00000089050	0.686333	4.5784	3.5671	up	O75884;O75884-2	Putative hydrolase RBBP9	RBBP9
	230	ENSG00000174718	0.685733	5.30277	4.06148	up	Q9HCM1	Uncharacterized protein KIAA1551	KIAA1551
	231	ENSG00000104946	0.6843	5.60906	4.25806	up	Q9HA65;M0R2L2;Q9HA65-3;Q9HA65-2;M0QYC9	TBC1 domain family member 17	TBC1D17
	232	ENSG00000165704	0.684233	4.78516	3.7177	up	P00492	Hypoxanthine-guanine phosphoribosyltransferase	HPRT1
	233	ENSG00000170542	0.6831	6.0942	4.54975	up	P50453	Serpin B9	SERPINB9
	234	ENSG00000079150	0.682467	6.36452	4.70774	up	Q9Y680;Q9Y680-3	Peptidyl-prolyl cis-trans isomerase FKBP7	FKBP7
	235	ENSG00000173272	0.6821	5.05159	3.89865	up	Q6P582	Mitotic-spindle organizing protein 2A	MZT2A
	236	ENSG00000197355	0.6809	4.27409	3.34622	up	Q3KQV9;Q3KQV9-2	UDP-N-acetylhexosamine pyrophosphorylase-like protein 1	UAP1L1
	237	ENSG00000178209	0.6801	5.6038	4.25727	up	Q15149;Q15149-4;Q15149-6;Q15149-9;Q15149-7;Q15149-5	Plectin	PLEC
	238	ENSG00000134146	0.673033	5.74473	4.33442	up	Q7L8W6;H0YNH5;H0YND7	Diphthine--ammonia ligase	DPH6
	239	ENSG00000143919	0.669467	4.26922	3.34321	up	Q7Z624;B5MC79;B5MC16;Q7Z624-2	Calmodulin-lysine N-methyltransferase	CAMKMT
	240	ENSG00000023041	0.669167	5.33536	4.07727	up	Q9H6R6;Q9H6R6-2	Palmitoyltransferase ZDHHC6	ZDHHC6
	241	ENSG00000114648	0.668233	4.69037	3.64568	up	O94889;O94889-2	Kelch-like protein 18	KLHL18
	242	NA	0.6662	5.76955	4.34775	up	Q9UN81	LINE-1 retrotransposable element ORF1 protein	L1RE1
	243	ENSG00000119522	0.660933	5.57512	4.24033	up	Q8TEH3;Q8TEH3-6;Q8TEH3-2;A0A0A0MS48;Q8TEH3-4;Q8TEH3-3;Q8TEH3-5;Q8TEH3-7	DENN domain-containing protein 1A	DENND1A
	244	ENSG00000089220	0.6601	4.50169	3.50764	up	P30086	Phosphatidylethanolamine-binding protein 1;Hippocampal cholinergic neurostimulating peptide	PEBP1
	245	ENSG00000269405	0.658833	5.00789	3.86895	up	Q9GZY0	Nuclear RNA export factor 2	NXF2
	246	ENSG00000180611	0.658367	4.93554	3.81899	up	Q8IYB1	Protein MB21D2	MB21D2
	247	ENSG00000124104	0.656467	3.6896	2.91649	up	Q969T3;Q5JZH3;Q969T3-3;Q5JZH4;Q05DJ0;Q969T3-2	Sorting nexin-21	SNX21
	248	ENSG00000117318	0.654733	4.28819	3.35674	up	Q02535	DNA-binding protein inhibitor ID-3	ID3
	249	ENSG00000066557	0.651867	5.64397	4.27984	up	Q9H9A6	Leucine-rich repeat-containing protein 40	LRRC40
	250	ENSG00000196352	0.646167	4.45842	3.4788	up	P08174;P08174-2;B1AP15;H3BLV0;B1AP13;H7BY55;P08174-4;P08174-3;P08174-5;P08174-6;P08174-7;A0A2R8YDY3;A0A2R8YEC5	Complement decay-accelerating factor	CD55
	251	ENSG00000140263	0.645233	4.6968	3.65051	up	Q00796;H0YLA4	Sorbitol dehydrogenase	SORD
	252	ENSG00000178814	0.645	4.14752	3.25355	up	O14841	5-oxoprolinase	OPLAH
	253	ENSG00000104408	0.644767	5.63264	4.27491	up	P60228;E5RGA2	Eukaryotic translation initiation factor 3 subunit E	EIF3E
	254	ENSG00000131269	0.6421	4.98297	3.85563	up	O75027;A0A5F9ZA98;O75027-2;A0A590UJS8;B4DGL8;A0A087WW65;O75027-3;A0A2R8Y473	ATP-binding cassette sub-family B member 7, mitochondrial	ABCB7
	255	ENSG00000124356	0.637467	4.8729	3.77431	up	O95630;C9JK83;O95630-2	STAM-binding protein	STAMBP
	256	ENSG00000160211	0.635867	4.07366	3.19969	up	P11413;P11413-3;P11413-2;E7EUI8;E7EM57	Glucose-6-phosphate 1-dehydrogenase	G6PD
	257	ENSG00000196821	0.635467	4.64589	3.6127	up	Q9H6K1;Q9H6K1-2;Q5TH58	Uncharacterized protein C6orf106	C6orf106
	258	ENSG00000150893	0.6333	5.5157	4.19246	up	Q5SZK8;Q5SZK8-2	FRAS1-related extracellular matrix protein 2	FREM2
	259	ENSG00000169371	0.6319	5.77728	4.35164	up	O95149;H3BRI5;H3BQR0;H3BTA6;H3BSK1;H3BUB4	Snurportin-1	SNUPN
	260	ENSG00000176834	0.6314	5.00218	3.86713	up	Q8N0Z9;Q8N0Z9-2;F5H724	V-set and immunoglobulin domain-containing protein 10	VSIG10
	261	ENSG00000136810	0.6302	3.68464	2.91274	up	P10599;P10599-2	Thioredoxin	TXN
	262	ENSG00000106268	0.629033	5.04383	3.89698	up	P36639;P36639-4;P36639-3;P36639-2	7,8-dihydro-8-oxoguanine triphosphatase	NUDT1
	263	ENSG00000070010	0.627167	4.54516	3.54306	up	Q92890;Q92890-1;Q92890-3;C9JNP9	Ubiquitin fusion degradation protein 1 homolog	UFD1L
	264	ENSG00000136938	0.625133	4.57349	3.56382	up	Q92688;Q92688-2	Acidic leucine-rich nuclear phosphoprotein 32 family member B	ANP32B
	265	ENSG00000243449	0.6246	4.86012	3.76439	up	Q5BLP8;Q5BLP8-3;Q5BLP8-2	Neuropeptide-like protein C4orf48	C4orf48
	266	ENSG00000259431	0.623667	5.25649	4.03527	up	Q9BU02;G3V5B9;G3V5Q5;Q9BU02-2	Thiamine-triphosphatase	THTPA
	267	ENSG00000166333	0.623033	5.17914	3.97815	up	Q13418;A0A0A0MTH3;Q13418-2;Q13418-3	Integrin-linked protein kinase	ILK
	268	ENSG00000176087	0.620933	4.8041	3.7309	up	L0R6Q1	NA	SLC35A4
	269	ENSG00000183624	0.619833	4.28735	3.35674	up	Q96FZ2;D6R9T3;E7EMP6;D6RGK7;D6RAZ3	Embryonic stem cell-specific 5-hydroxymethylcytosine-binding protein	HMCES
	270	ENSG00000102699	0.619733	4.97062	3.84541	up	Q9UKK3	Poly [ADP-ribose] polymerase 4	PARP4
	271	ENSG00000103653	0.617733	5.65561	4.28651	up	P41240	Tyrosine-protein kinase CSK	CSK
	272	ENSG00000189171	0.6171	3.15	2.51371	up	Q99584	Protein S100-A13	S100A13
	273	ENSG00000129493	0.6171	4.44855	3.47117	up	Q86XA9;F5H619;Q86XA9-2;H7C5W6	HEAT repeat-containing protein 5A	HEATR5A
	274	ENSG00000136682	0.616267	4.69897	3.65227	up	C9J3G2;Q8IUF1;Q9BRT8-3;A0A0A0MRU4;Q5RIB0;Q5JTY5-2;Q9BRT8;Q5RIA9;Q5JTY5;A0A0A6YYH9;Q9BRT8-2;H0Y5V3;Q4V339;A0A087X140;A0A0B4J2F1;A0A087WWG3;Q5RIA9-3;F2Z2T4	COBW domain-containing protein 2;COBW domain-containing protein 1;COBW domain-containing protein 3;COBW domain-containing protein 5;COBW domain-containing protein 6	CBWD2;CBWD1;CBWD3;CBWD5;CBWD7;CBWD6
	275	ENSG00000165983	0.615433	3.85093	3.03243	up	Q96BW5;Q96BW5-2;A0A0A0MSI3	Phosphotriesterase-related protein	PTER
	276	ENSG00000198841	0.615233	4.46344	3.48129	up	Q96EK9;A0A3B3IU88	Protein KTI12 homolog	KTI12
	277	ENSG00000096872	0.614933	4.67366	3.63205	up	Q96LB3;Q96LB3-2	Intraflagellar transport protein 74 homolog	IFT74
	278	ENSG00000159228	0.6128	5.8041	4.36653	up	P16152	Carbonyl reductase [NADPH] 1	CBR1
	279	ENSG00000087884	0.611833	5.73993	4.33442	up	Q9H7C9;E9PNP3;E9PR47	Mth938 domain-containing protein	AAMDC
	280	ENSG00000136830	0.6113	5.44009	4.14388	up	Q96TA1;Q96TA1-2	Niban-like protein 1	FAM129B
	281	ENSG00000166825	0.6084	5.14448	3.95546	up	P15144	Aminopeptidase N	ANPEP
	282	ENSG00000179958	0.608067	3.43782	2.72888	up	Q9H773	dCTP pyrophosphatase 1	DCTPP1
	283	ENSG00000147677	0.607333	5.59007	4.25026	up	O15372;B3KS98;A0A087WZK9;E5RGU4	Eukaryotic translation initiation factor 3 subunit H	EIF3H
	284	ENSG00000268606	0.607167	4.10127	3.2192	up	P43356	Melanoma-associated antigen 2	MAGEA2
	285	ENSG00000112029	0.604733	3.55071	2.81226	up	Q9UKT4;Q9UKT4-2	F-box only protein 5	FBXO5
	286	ENSG00000114491	0.602	4.91721	3.8057	up	P11172;P11172-3;E9PFD2;P11172-2;P11172-4	Uridine 5-monophosphate synthase;Orotate phosphoribosyltransferase;Orotidine 5-phosphate decarboxylase	UMPS
	287	ENSG00000065970	0.599767	3.80677	2.99974	up	Q9P0K8;Q9P0K8-2	Forkhead box protein J2	FOXJ2
	288	ENSG00000243678	0.599467	4.31247	3.37427	up	P22392-2;Q32Q12;P22392;J3KPD9;E7ERL0;O60361	Nucleoside diphosphate kinase B;Nucleoside diphosphate kinase;Putative nucleoside diphosphate kinase	NME2;NME1-NME2;NME1;NME2P1
	289	ENSG00000188158	0.599167	5.33348	4.07676	up	Q6T4R5;A0A087WU78;A0A087WWC4;Q6T4R5-4;Q6T4R5-3;Q6T4R5-2	Nance-Horan syndrome protein	NHS
	290	ENSG00000116675	0.599133	4.4908	3.50129	up	O75061;O75061-4;O75061-2;S4R305;O75061-3	Putative tyrosine-protein phosphatase auxilin	DNAJC6
	291	ENSG00000185651	0.598767	4.50724	3.51187	up	P68036;P68036-2;P68036-3;A0A1B0GUS4	Ubiquitin-conjugating enzyme E2 L3	UBE2L3
	292	ENSG00000180233	0.5986	4.97469	3.84903	up	Q8NHG8	E3 ubiquitin-protein ligase ZNRF2	ZNRF2
	293	ENSG00000112874	0.598333	5.266	4.03716	up	Q9BQG2;Q9BQG2-2	Peroxisomal NADH pyrophosphatase NUDT12	NUDT12
	294	ENSG00000177156	0.595467	4.13787	3.24714	up	P37837;F2Z393	Transaldolase	TALDO1
	295	ENSG00000001036	0.595467	4.76195	3.70158	up	Q9BTY2;Q9BTY2-2	Plasma alpha-L-fucosidase	FUCA2
	296	ENSG00000131165	0.5941	2.49646	2.03001	up	Q9HD42;F8VVT7;F8VUA2	Charged multivesicular body protein 1a	CHMP1A
	297	ENSG00000144306	0.593333	4.31336	3.37469	up	Q0VDG4;Q0VDG4-2;F8W0M9;C9JID8	Secernin-3	SCRN3
	298	ENSG00000240972	0.5866	5.35067	4.08991	up	P14174	Macrophage migration inhibitory factor	MIF
	299	ENSG00000136319	0.5863	4.5986	3.58031	up	Q8N0Z6;H9KV81	Tetratricopeptide repeat protein 5	TTC5
	300	ENSG00000089225	0.585967	3.27952	2.60651	up	Q99593;Q99593-3;Q99593-2	T-box transcription factor TBX5	TBX5
	301	ENSG00000089818	0.585633	3.92943	3.09507	up	Q8NC96;F5GYH1;A0A1W2PRM0;A0A1W2PRL5;A0A1W2PR09;A0A1W2PR27;A0A1W2PPF5;A0A1W2PRQ7;Q8NC96-2	Adaptin ear-binding coat-associated protein 1	NECAP1
	302	ENSG00000234745	0.585633	4.02919	3.16785	up	P01889;A0A1W2PPR8;F6U0H7	HLA class I histocompatibility antigen, B-7 alpha chain	HLA-B
	303	ENSG00000008130	0.5856	4.38722	3.42609	up	O95544;O95544-2;A0A0A0MR98;O95544-3	NAD kinase	NADK
	304	ENSG00000133195	0.585367	4.4034	3.43673	up	Q8N1S5;Q8N1S5-2;J3QLB2;J3KRX2;J3QS49;A0A0J9YXZ0;A0A0J9YXE3;J3QQP1;J3QRN3;A0A0J9YXX3;J3KS66;J3QLA9	Zinc transporter ZIP11	SLC39A11
	305	ENSG00000108439	0.584733	4.32057	3.37907	up	Q9NVS9;J3QQZ9;Q9NVS9-4;Q9NVS9-3;J3QQV6	Pyridoxine-5-phosphate oxidase	PNPO
	306	ENSG00000197798	0.583467	5.14752	3.95776	up	Q9BPY3;E9PMJ2;J3KP39;E9PMW3;G3V179	Protein FAM118B	FAM118B
	307	ENSG00000140367	0.583267	5.25414	4.03527	up	Q8WVN8;Q8WVN8-4;Q8WVN8-3	Ubiquitin-conjugating enzyme E2 Q2	UBE2Q2
	308	ENSG00000204463	0.5827	5	3.86713	up	P46379;P46379-2;A0A0G2JK23;A0A024RCR6;P46379-3;P46379-5;A0A0G2JL47;P46379-4	Large proline-rich protein BAG6	BAG6;BAT3
	309	ENSG00000196262	0.581233	4.07417	3.19969	up	P62937;F8WE65;C9J5S7;P62937-2	Peptidyl-prolyl cis-trans isomerase A;Peptidyl-prolyl cis-trans isomerase A, N-terminally processed;Peptidyl-prolyl cis-trans isomerase	PPIA
	310	ENSG00000131469	0.5799	3.41305	2.71057	unchanged	P61353;K7ELC7	60S ribosomal protein L27	RPL27
	311	ENSG00000131475	0.5796	5.02687	3.88494	unchanged	Q9BRG1;K7EKV4;K7ENE3	Vacuolar protein-sorting-associated protein 25	VPS25
	312	ENSG00000169905	0.578767	3.6876	2.91515	unchanged	Q9H496	Torsin-1A-interacting protein 2, isoform IFRG15	TOR1AIP2
	313	ENSG00000133138	0.577233	4.35754	3.40324	unchanged	Q0IIM8;J3KN75;H0Y552	TBC1 domain family member 8B	TBC1D8B
	314	ENSG00000129474	0.576833	4.66959	3.63093	unchanged	Q96IF1	LIM domain-containing protein ajuba	AJUBA
	315	ENSG00000095906	0.576767	5.00043	3.86713	unchanged	Q9Y5Y2;H3BNF0;H3BNS4;H3BQR2	Cytosolic Fe-S cluster assembly factor NUBP2	NUBP2
	316	ENSG00000109618	0.576233	2.77245	2.24161	unchanged	Q9HD40;Q9HD40-3	O-phosphoseryl-tRNA(Sec) selenium transferase	SEPSECS
	317	ENSG00000079462	0.575967	4.86328	3.76667	unchanged	Q15102;M0R389;M0QXS6;M0R323;M0QZT2;M0R1K3	Platelet-activating factor acetylhydrolase IB subunit gamma	PAFAH1B3
	318	ENSG00000124767	0.575333	4.47237	3.4878	unchanged	Q04760;Q04760-2	Lactoylglutathione lyase	GLO1
	319	ENSG00000168884	0.573833	3.48043	2.75833	unchanged	Q8NFZ5;D6RGJ2;Q8NFZ5-2	TNFAIP3-interacting protein 2	TNIP2
	320	ENSG00000154473	0.573533	4.62342	3.59594	unchanged	O43684;O43684-2;J3QT28;J3QSX4	Mitotic checkpoint protein BUB3	BUB3
	321	ENSG00000090889	0.572433	5.74958	4.33536	unchanged	O95239;O95239-2	Chromosome-associated kinesin KIF4A	KIF4A
	322	ENSG00000177889	0.5719	3.42996	2.72389	unchanged	P61088;F8VZ29;F8VSD4;F8VV71;Q5JXB2	Ubiquitin-conjugating enzyme E2 N;Putative ubiquitin-conjugating enzyme E2 N-like	UBE2N;UBE2NL
	323	ENSG00000162813	0.571833	4.73518	3.6804	unchanged	O95861;O95861-2;O95861-4;F8VZG4;F8W1J0;O95861-3	3(2),5-bisphosphate nucleotidase 1	BPNT1
	324	ENSG00000105887	0.571167	3.46293	2.74643	unchanged	P58546;C9JL85	Myotrophin	MTPN
	325	ENSG00000182247	0.5708	3.68452	2.91274	unchanged	Q96LR5	Ubiquitin-conjugating enzyme E2 E2	UBE2E2
	326	ENSG00000148158	0.5691	4.52724	3.52843	unchanged	Q5VWJ9	Sorting nexin-30	SNX30
	327	ENSG00000196976	0.565867	3.55993	2.81869	unchanged	Q14657	EKC/KEOPS complex subunit LAGE3	LAGE3
	328	ENSG00000204394	0.565867	4.48149	3.49374	unchanged	P26640;A0A140T936	Valine--tRNA ligase	VARS
	329	ENSG00000213719	0.565567	3.97725	3.13158	unchanged	O00299	Chloride intracellular channel protein 1	CLIC1
	330	ENSG00000114520	0.5653	4.56384	3.55649	unchanged	O95219;O95219-2	Sorting nexin-4	SNX4
	331	ENSG00000140497	0.564967	4.25649	3.33212	unchanged	O15127	Secretory carrier-associated membrane protein 2	SCAMP2
	332	ENSG00000159231	0.564833	3.68141	2.90996	unchanged	O75828	Carbonyl reductase [NADPH] 3	CBR3
	333	ENSG00000135828	0.563167	3.1603	2.52098	unchanged	Q05823;Q05823-2	2-5A-dependent ribonuclease	RNASEL
	334	ENSG00000100387	0.562933	1.28397	1.06754	unchanged	P62877	E3 ubiquitin-protein ligase RBX1;E3 ubiquitin-protein ligase RBX1, N-terminally processed	RBX1
	335	ENSG00000143437	0.5609	4.05502	3.18856	unchanged	P27540;P27540-3;P27540-4;A6NGV6;P27540-2	Aryl hydrocarbon receptor nuclear translocator	ARNT
	336	ENSG00000100353	0.559667	5.64782	4.2815	unchanged	O15371;O15371-2;O15371-3	Eukaryotic translation initiation factor 3 subunit D	EIF3D
	337	ENSG00000213930	0.557633	3.11746	2.49285	unchanged	P07902;G3V3U5;G3V223;F2Z2X9;G3V4G9	Galactose-1-phosphate uridylyltransferase	GALT
	338	ENSG00000167600	0.556267	4.68194	3.63973	unchanged	Q96SQ9;Q96SQ9-2	Cytochrome P450 2S1	CYP2S1
	339	ENSG00000113552	0.556133	5.63827	4.27819	unchanged	P46926;D6RAY7;D6R9P4;D6RFF8;P46926-2;D6RB13	Glucosamine-6-phosphate isomerase 1;Glucosamine-6-phosphate isomerase	GNPDA1
	340	ENSG00000007080	0.555533	4.42136	3.44925	unchanged	Q96CT7	Coiled-coil domain-containing protein 124	CCDC124
	341	ENSG00000173465	0.554867	3.08945	2.47237	unchanged	O60232;G3V1B8;H0YEB6	Sjoegren syndrome/scleroderma autoantigen 1	SSSCA1
	342	ENSG00000139433	0.553767	3.12005	2.49497	unchanged	Q9NZD2;F5H0U5	Glycolipid transfer protein	GLTP
	343	ENSG00000103187	0.553267	4.20412	3.29476	unchanged	Q14019;H3BT58	Coactosin-like protein	COTL1
	344	ENSG00000133142	0.552933	2.81739	2.27404	unchanged	Q96EI5;Q96EI5-2;D6RD44;A2RQR6;J3KQY4;D6RHZ1;D6RIH3;D6RCE9	Transcription elongation factor A protein-like 4	TCEAL4
	345	ENSG00000117632	0.551467	4.12148	3.23322	unchanged	P16949;A2A2D0;P16949-2	Stathmin	STMN1
	346	ENSG00000078618	0.551467	4.17263	3.27102	unchanged	O43847;O43847-2;G3V1R5;F5H7V1	Nardilysin	NRD1
	347	ENSG00000134030	0.550267	4.07314	3.19952	unchanged	O43310;O43310-2	CBP80/20-dependent translation initiation factor	CTIF
	348	ENSG00000188677	0.5492	5.011	3.87052	unchanged	Q9HBI1;Q9HBI1-3;Q9HBI1-2;B0QYP8;A0A087WZB5	Beta-parvin	PARVB
	349	ENSG00000140365	0.549133	5.09474	3.92206	unchanged	Q9H0A8;A0A0B4J287;H3BM91;Q9H0A8-3;Q9H0A8-2	COMM domain-containing protein 4	COMMD4
	350	ENSG00000198680	0.549033	3.07077	2.45857	unchanged	Q2TAM9	Tumor suppressor candidate gene 1 protein	TUSC1
	351	ENSG00000067177	0.5488	5.30103	4.06098	unchanged	P46020;A6NMN0;P46020-2;A6NIT2;P46020-3	Phosphorylase b kinase regulatory subunit alpha, skeletal muscle isoform	PHKA1
	352	ENSG00000018610	0.548667	4.94692	3.82627	unchanged	Q9H5V9;Q9H5V9-3;Q9H5V9-2	UPF0428 protein CXorf56	CXorf56
	353	ENSG00000175390	0.547967	4.30103	3.36586	unchanged	O00303	Eukaryotic translation initiation factor 3 subunit F	EIF3F
	354	ENSG00000269586	0.547967	4.75696	3.69871	unchanged	P0DMU9	Cancer/testis antigen family 45 member A10	CT45A10
	355	ENSG00000186469	0.5478	4.91009	3.80175	unchanged	P59768;G3V3J9;G3V2N0	Guanine nucleotide-binding protein G(I)/G(S)/G(O) subunit gamma-2;Guanine nucleotide-binding protein subunit gamma	GNG2
	356	ENSG00000141376	0.547167	4.64589	3.6127	unchanged	Q9H6U6;Q9H6U6-2;Q9H6U6-7;Q9H6U6-3;Q9H6U6-8;K7ESE9;Q9H6U6-6	Breast carcinoma-amplified sequence 3	BCAS3
	357	ENSG00000140326	0.546167	3.97727	3.13158	unchanged	Q8IWY9;Q8IWY9-1;H3BM60	Codanin-1	CDAN1
	358	ENSG00000104129	0.545133	4.59176	3.57474	unchanged	Q9NVM6	DnaJ homolog subfamily C member 17	DNAJC17
	359	ENSG00000115159	0.544867	5.09044	3.92168	unchanged	P43304;P43304-2	Glycerol-3-phosphate dehydrogenase, mitochondrial	GPD2
	360	ENSG00000177380	0.5448	3.21767	2.56285	unchanged	O75145;O75145-2;R4GN36	Liprin-alpha-3	PPFIA3
	361	ENSG00000139990	0.5426	2.71121	2.19398	unchanged	Q96JK2;Q96JK2-2;Q96JK2-3	DDB1- and CUL4-associated factor 5	DCAF5
	362	ENSG00000140463	0.541433	5.11634	3.9396	unchanged	Q96RK4;H3BSL2;Q96RK4-2	Bardet-Biedl syndrome 4 protein	BBS4
	363	ENSG00000141096	0.541133	4.84466	3.75532	unchanged	Q9H4B8;A0A5F9ZHB4	Dipeptidase 3	DPEP3
	364	ENSG00000151876	0.539167	3.57194	2.82759	unchanged	Q9UKT5;D6RAJ6;Q9UKT5-2;D6RAU6;D6REP2	F-box only protein 4	FBXO4
	365	ENSG00000110721	0.5389	4.04144	3.17824	unchanged	P35790;P35790-2	Choline kinase alpha	CHKA
	366	ENSG00000177225	0.538833	4.57187	3.56354	unchanged	Q8NB37;Q8NB37-2;H0YE25;H0YF25;Q8NB37-3;H0YER3	Parkinson disease 7 domain-containing protein 1	PDDC1
	367	ENSG00000102393	0.538567	5.31966	4.07058	unchanged	P06280;A0A3B3IUC4	Alpha-galactosidase A	GLA
	368	ENSG00000130717	0.5384	4.61618	3.59237	unchanged	Q9HA47;Q9HA47-3;Q9HA47-4;G3V170;Q9HA47-2	Uridine-cytidine kinase 1	UCK1
	369	ENSG00000068308	0.5383	4.36251	3.40718	unchanged	Q96G74;A0A087WXV6;Q96G74-2;Q96G74-3;Q96G74-5;H7BZQ3;Q96G74-4	OTU domain-containing protein 5	OTUD5
	370	ENSG00000144535	0.5382	3.93935	3.1019	unchanged	Q8IYB7;Q8IYB7-3;Q8IYB7-2;H7C440	DIS3-like exonuclease 2	DIS3L2
	371	ENSG00000162616	0.537867	4.3363	3.39007	unchanged	Q9UDY4	DnaJ homolog subfamily B member 4	DNAJB4
	372	ENSG00000103876	0.537233	4.62893	3.60064	unchanged	P16930;P16930-2	Fumarylacetoacetase	FAH
	373	ENSG00000126970	0.537133	4.62893	3.60048	unchanged	Q9NQZ6;Q9NQZ6-3;Q9NQZ6-5;Q9NQZ6-2;Q9NQZ6-4	Zinc finger C4H2 domain-containing protein	ZC4H2
	374	ENSG00000232112	0.5362	2.15598	1.76639	unchanged	Q9Y2S6;A0A024R1R8	Translation machinery-associated protein 7	TMA7;hCG_2014768
	375	ENSG00000103089	0.535167	3.49039	2.7656	unchanged	Q7L5A8	Fatty acid 2-hydroxylase	FA2H
	376	ENSG00000164237	0.534333	3.15683	2.51801	unchanged	Q96DG6	Carboxymethylenebutenolidase homolog	CMBL
	377	ENSG00000100522	0.531167	4.02503	3.16477	unchanged	Q96EK6;G3V5E4;G3V4W4	Glucosamine 6-phosphate N-acetyltransferase	GNPNAT1
	378	ENSG00000070718	0.529633	4.33536	3.38915	unchanged	P53677;E7ER80;E5RJ52;P53677-2	AP-3 complex subunit mu-2	AP3M2
	379	ENSG00000100949	0.529567	4.52433	3.52725	unchanged	Q92696;H0YLH3	Geranylgeranyl transferase type-2 subunit alpha	RABGGTA
	380	ENSG00000023191	0.5285	4.5784	3.5671	unchanged	P13489	Ribonuclease inhibitor	RNH1
	381	ENSG00000173113	0.5279	4.77211	3.70918	unchanged	Q9UI30;F5GX77;Q9UI30-2;F5GYQ2	Multifunctional methyltransferase subunit TRM112-like protein	TRMT112
	382	ENSG00000096060	0.526767	4.75696	3.69871	unchanged	Q13451;Q13451-2	Peptidyl-prolyl cis-trans isomerase FKBP5;Peptidyl-prolyl cis-trans isomerase FKBP5, N-terminally processed	FKBP5
	383	ENSG00000112667	0.5265	4.63451	3.60358	unchanged	O43598;H0Y8X4;O43598-2	2-deoxynucleoside 5-phosphate N-hydrolase 1	DNPH1
	384	ENSG00000168234	0.525267	4.18977	3.28429	unchanged	Q8N584;Q8N584-2;G3V1P2	Tetratricopeptide repeat protein 39C	TTC39C
	385	ENSG00000124659	0.524433	4.39903	3.43381	unchanged	Q15814	Tubulin-specific chaperone C	TBCC
	386	ENSG00000130787	0.523233	5.27003	4.03858	unchanged	O75146;O75146-2	Huntingtin-interacting protein 1-related protein	HIP1R
	387	ENSG00000197045	0.5231	3.66476	2.89871	unchanged	P60983;G3V4P8	Glia maturation factor beta	GMFB
	388	ENSG00000153179	0.52	3.88344	3.05784	unchanged	Q86WH2;A0A1B0GUG6	Ras association domain-containing protein 3	RASSF3
	389	ENSG00000127603	0.517633	5.04964	3.89764	unchanged	A0A0A6YYJ5;A0A286YES6	NA	MACF1
	390	ENSG00000214517	0.517433	2.63526	2.13621	unchanged	Q9Y570;Q9Y570-4;Q9Y570-2	Protein phosphatase methylesterase 1	PPME1
	391	ENSG00000140718	0.516933	4.01233	3.15683	unchanged	Q9C0B1;A0A1B0GTC3;A0A1B0GVH5;A0A1B0GUC3;A0A1B0GV98;A0A1B0GTC5;A0A1B0GU26;A0A1B0GTY1	Alpha-ketoglutarate-dependent dioxygenase FTO	FTO
	392	ENSG00000155959	0.516467	4.29757	3.36396	unchanged	P61758;P61758-2	Prefoldin subunit 3	VBP1
	393	ENSG00000148737	0.515833	4.48017	3.49302	unchanged	Q9NQB0-9;Q9NQB0-11;Q9NQB0-15;Q9NQB0-14;Q9NQB0-6;Q9NQB0-4;Q9NQB0-2;Q9NQB0-7;Q9NQB0-13;Q9NQB0-5;A0A1B0GUV5;Q5VVR7;A0A0D9SGH8;C6ZRK5;C6ZRJ6;A0A0A0MTL7;C6ZRJ7;E2GH26;Q9NQB0-8;Q9NQB0;Q9NQB0-3;Q9NQB0-16;Q9NQB0-10;Q9NQB0-12	Transcription factor 7-like 2	TCF7L2
	394	ENSG00000139687	0.514067	3.99868	3.14665	unchanged	P06400;A0A3B3IS71	Retinoblastoma-associated protein	RB1
	395	ENSG00000131171	0.5131	3.60086	2.8518	unchanged	O75368	SH3 domain-binding glutamic acid-rich-like protein	SH3BGRL
	396	ENSG00000173457	0.513067	3.34763	2.66061	unchanged	Q96C90	Protein phosphatase 1 regulatory subunit 14B	PPP1R14B
	397	ENSG00000011009	0.512667	4.82391	3.74306	unchanged	Q5QPQ0;Q5QPQ1	NA	LYPLA2
	398	ENSG00000154928	0.5126	2.86125	2.30623	unchanged	P54762;A0A3B3IRY8;P54762-5	Ephrin type-B receptor 1	EPHB1
	399	ENSG00000135929	0.511967	2.42298	1.97715	unchanged	Q02318;F8WD90;C9J1K5	Sterol 26-hydroxylase, mitochondrial	CYP27A1
	400	ENSG00000102178	0.511233	4.6038	3.58326	unchanged	P11441;Q5HY81	Ubiquitin-like protein 4A	UBL4A
	401	ENSG00000118939	0.509	3.0769	2.46377	unchanged	P15374;A0A087WTB8;Q5TBK7	Ubiquitin carboxyl-terminal hydrolase isozyme L3;Ubiquitin carboxyl-terminal hydrolase	UCHL3
	402	ENSG00000137094	0.5084	4.33724	3.39036	unchanged	O75953;O75953-4;O75953-5	DnaJ homolog subfamily B member 5	DNAJB5
	403	ENSG00000138621	0.508	3.03035	2.42906	unchanged	Q96CD2;H3BRQ0;Q96CD2-2	Phosphopantothenoylcysteine decarboxylase	PPCDC
	404	ENSG00000077152	0.507333	4.21183	3.29781	unchanged	Q9NPD8	Ubiquitin-conjugating enzyme E2 T	UBE2T
	405	ENSG00000066468	0.507167	3.36012	2.67016	unchanged	P21802;E7EVR7;A0A0A0MR25;S4R381;D2CGD1;H7BXU9;P21802-20;P21802-4;P21802-21;P21802-23;P21802-8;P21802-2;P21802-17;P21802-6;P21802-5;P21802-18;P21802-3;P21802-22;P21802-16;H7C265;P21802-15	Fibroblast growth factor receptor 2;Fibroblast growth factor receptor;Receptor protein-tyrosine kinase	FGFR2
	406	ENSG00000140650	0.506433	3.86064	3.03842	unchanged	O15305;H3BV55;H3BPH4;H3BRM0;O15305-2	Phosphomannomutase 2;Phosphomannomutase	PMM2
	407	ENSG00000152700	0.5058	4.16749	3.26682	unchanged	Q9Y6B6;D6R9R5;Q9H029;D6RD69	GTP-binding protein SAR1b	SAR1B;DKFZp434B2017
	408	ENSG00000082641	0.504967	3.91389	3.08106	unchanged	Q14494;Q14494-2;J3QKY3;B4DYE1;F5H1B7;J9JIE5	Nuclear factor erythroid 2-related factor 1	NFE2L1
	409	ENSG00000156873	0.504033	4.20551	3.29534	unchanged	P15735;J3KNN3;P15735-2;H3BP07;H3BTW6	Phosphorylase b kinase gamma catalytic chain, liver/testis isoform	PHKG2
	410	ENSG00000100994	0.5037	4.40121	3.4359	unchanged	P11216	Glycogen phosphorylase, brain form	PYGB
	411	ENSG00000160752	0.5037	4.55284	3.54875	unchanged	P14324;P14324-2;A0A087WVN4;A0A087X1D8	Farnesyl pyrophosphate synthase	FDPS
	412	ENSG00000142168	0.5032	3.64941	2.88759	unchanged	P00441;H7BYH4	Superoxide dismutase [Cu-Zn]	SOD1
	413	ENSG00000106605	0.503	3.93607	3.09978	unchanged	P53004	Biliverdin reductase A	BLVRA
	414	ENSG00000058668	0.503	4.00524	3.1506	unchanged	P23634;P23634-6;P23634-7;P23634-8;P23634-2;P23634-5;P23634-4;P23634-3	Plasma membrane calcium-transporting ATPase 4	ATP2B4
	415	ENSG00000109814	0.5028	5.06098	3.90138	unchanged	O60701;O60701-2;O60701-3	UDP-glucose 6-dehydrogenase	UGDH
	416	ENSG00000288701	0.502567	5.25571	4.03527	unchanged	Q5JSZ5;Q5JSZ5-5;A0A494C0D3	Protein PRRC2B	PRRC2B
	417	ENSG00000137200	0.500267	5.07988	3.91587	unchanged	Q8N1G2	Cap-specific mRNA (nucleoside-2-O-)-methyltransferase 1	CMTR1
	418	ENSG00000108984	0.4997	4.21824	3.30121	unchanged	P52564;P52564-2	Dual specificity mitogen-activated protein kinase kinase 6	MAP2K6
	419	ENSG00000100823	0.498733	3.81211	3.00387	unchanged	P27695;G3V5Q1;G3V3M6;A0A0C4DGK8;G3V3C7;H7C4A8;G3V5M0;G3V359	DNA-(apurinic or apyrimidinic site) lyase;DNA-(apurinic or apyrimidinic site) lyase, mitochondrial	APEX1
	420	ENSG00000078687	0.498533	3.85322	3.03398	unchanged	Q9HCJ0;Q9HCJ0-2;A0A1B0GU24	Trinucleotide repeat-containing gene 6C protein	TNRC6C
	421	ENSG00000182551	0.498267	4.65758	3.62064	unchanged	Q9BV57;Q9BV57-2	1,2-dihydroxy-3-keto-5-methylthiopentene dioxygenase	ADI1
	422	ENSG00000224608	0.497867	4.94692	3.82627	unchanged	A0A140TA14;A0A140TA11;A0A140T9Y5;A0A140T997	NA	NA
	423	ENSG00000184110	0.495367	3.46001	2.7441	unchanged	Q99613;Q99613-2;B5ME19	Eukaryotic translation initiation factor 3 subunit C;Eukaryotic translation initiation factor 3 subunit C-like protein	EIF3C;EIF3CL
	424	ENSG00000128789	0.4942	3.89842	3.06789	unchanged	Q969U7;Q969U7-2;K7ENR6;V9GZ55	Proteasome assembly chaperone 2	PSMG2
	425	ENSG00000174705	0.491633	4.45717	3.4788	unchanged	A1X283	SH3 and PX domain-containing protein 2B	SH3PXD2B
	426	ENSG00000012963	0.490233	4.05552	3.18856	unchanged	Q8N806;E9PCJ7	Putative E3 ubiquitin-protein ligase UBR7	UBR7
	427	ENSG00000266967	0.489733	3.60771	2.85547	unchanged	Q9BTE6;Q9BTE6-2;C9J5N1;Q9BTE6-3	Alanyl-tRNA editing protein Aarsd1	AARSD1;PTGES3L-AARSD1
	428	ENSG00000143891	0.4896	3.87857	3.05335	unchanged	Q96C23;B8ZZ75;H7C320	Aldose 1-epimerase	GALM
	429	ENSG00000161980	0.4891	4.74232	3.68676	unchanged	Q9Y2Y1	DNA-directed RNA polymerase III subunit RPC10	POLR3K
	430	ENSG00000101966	0.488467	4.10018	3.2188	unchanged	P98170	E3 ubiquitin-protein ligase XIAP	XIAP
	431	ENSG00000123584	0.488367	5.13966	3.95538	unchanged	P43362	Melanoma-associated antigen 9	MAGEA9
	432	ENSG00000171368	0.4882	2.71581	2.1976	unchanged	O94811	Tubulin polymerization-promoting protein	TPPP
	433	ENSG00000214107	0.488133	2.41836	1.973	unchanged	P43366	Melanoma-associated antigen B1	MAGEB1
	434	ENSG00000152642	0.487367	4.21112	3.29781	unchanged	Q8N335;C9JM46	Glycerol-3-phosphate dehydrogenase 1-like protein;Glycerol-3-phosphate dehydrogenase [NAD(+)]	GPD1L
	435	ENSG00000155368	0.485567	2.69607	2.18172	unchanged	P07108;P07108-5;B8ZWD1;A0A0A0MTI5;P07108-3;P07108-2;P07108-4;P07108-6	Acyl-CoA-binding protein	DBI
	436	ENSG00000069020	0.485233	3.72342	2.94051	unchanged	O15021;O15021-2;O15021-3;O15021-6;H7C1I9	Microtubule-associated serine/threonine-protein kinase 4	MAST4
	437	ENSG00000141562	0.4852	4.01412	3.15827	unchanged	Q9UHQ1;J3KT43;E7EP87;A0A088AWN8;Q9UHQ1-4;Q9UHQ1-3;Q9UHQ1-2;J3KS48;E9PH27;J3QL28;J3QSD9;J3KTP5;J3QRB0;J3KRH7	Nuclear prelamin A recognition factor	NARF
	438	ENSG00000089682	0.4852	4.06298	3.19293	unchanged	Q96IZ5;Q96IZ5-2;Q96IZ5-3;H0Y6F9	RNA-binding protein 41	RBM41
	439	ENSG00000112699	0.484633	4.24185	3.31876	unchanged	O60547;O60547-2	GDP-mannose 4,6 dehydratase	GMDS
	440	ENSG00000134201	0.4834	3.05576	2.44815	unchanged	P46439;A0A3B3IRM5;Q5T8R1	Glutathione S-transferase Mu 5	GSTM5
	441	ENSG00000120942	0.483233	4.64589	3.6127	unchanged	Q9Y5Z9;Q9Y5Z9-2	UbiA prenyltransferase domain-containing protein 1	UBIAD1
	442	ENSG00000120868	0.4827	4.33913	3.39144	unchanged	O14727;O14727-4;C9JLV4;O14727-5;O14727-3;O14727-2;O14727-6	Apoptotic protease-activating factor 1	APAF1
	443	ENSG00000183496	0.482433	4.21112	3.29781	unchanged	Q6ZN04	RNA-binding protein MEX3B	MEX3B
	444	ENSG00000087842	0.482367	3.24929	2.58503	unchanged	O00625	Pirin	PIR
	445	ENSG00000147099	0.482067	2.91027	2.34024	unchanged	Q9BY41;A0A3B3IRI9;A6NGJ7;A0A3B3ISJ4;A0A3B3IS68;A0A3B3IT04;A0A3B3ITZ3;A0A3B3IRV1;Q9BY41-4;A0A3B3IT95;Q9BY41-5;A6NMT1;A0A3B3IRZ8;A0A3B3IRZ0;A0A3B3ISS7;A0A3B3IT30;A0A3B3IT84;E7EVA8;A0A3B3IRP8;A6NFW1	Histone deacetylase 8	HDAC8
	446	ENSG00000197894	0.481033	3.58196	2.8351	unchanged	P11766;H0YAG8	Alcohol dehydrogenase class-3	ADH5
	447	ENSG00000119541	0.480733	4.02595	3.16519	unchanged	O75351	Vacuolar protein sorting-associated protein 4B	VPS4B
	448	ENSG00000129657	0.480367	4.84771	3.75627	unchanged	Q92503;Q92503-3;Q92503-2;K7EJ08	SEC14-like protein 1	SEC14L1
	449	ENSG00000113163	0.479933	4.32239	3.38019	unchanged	Q9Y5P4;A0A2R8Y7Q9;A0A2R8YEK8;Q9Y5P4-3;Q9Y5P4-2;A0A2R8YE18;A0A2R8Y5S9;A0A2R8Y7C5;A0A2R8Y5H3;A0A2U3TZL3;A0A2R8YCI0;A0A2R8YFI2;A0A2R8YEA4;A0A2R8YE59	Collagen type IV alpha-3-binding protein	COL4A3BP
	450	ENSG00000102882	0.479467	4.10568	3.22237	unchanged	P27361;P27361-2;P27361-3;E9PJF0;E9PQW4;B3KR49;E9PBK7	Mitogen-activated protein kinase 3;Mitogen-activated protein kinase	MAPK3
	451	ENSG00000149716	0.479133	2.74197	2.21834	unchanged	Q8WV07;H3BPK6;F5GWS9;F5GZY6;B4DFA5	Oral cancer-overexpressed protein 1	ORAOV1
	452	ENSG00000125733	0.478967	4.82681	3.74314	unchanged	Q15642-2;Q15642;Q15642-3;W4VSQ9;Q15642-4;M0R0F9;M0R2H7;Q15642-5	Cdc42-interacting protein 4	TRIP10
	453	ENSG00000147536	0.4784	3.60455	2.85369	unchanged	Q9BRT9;E5RFF9	DNA replication complex GINS protein SLD5;DNA replication complex GINS protein SLD5, N-terminally processed;DNA replication complex GINS protein SLD5	GINS4
	454	ENSG00000149196	0.477933	2.98742	2.39769	unchanged	Q53FT3;E9PJB2;A0A087WYW7;E9PPG8	Protein Hikeshi	C11orf73
	455	ENSG00000188493	0.477867	4.34775	3.39633	unchanged	Q5BKX5;Q6ZWG5	UPF0692 protein C19orf54	C19orf54
	456	ENSG00000167196	0.4775	3.67785	2.90741	unchanged	Q8NEZ5	F-box only protein 22	FBXO22
	457	ENSG00000136261	0.477433	3.82489	3.01265	unchanged	Q9Y6E2;E7ETZ4;B5MCH7;B5MCE7;Q75MG1	Basic leucine zipper and W2 domain-containing protein 2	BZW2
	458	ENSG00000254685	0.477367	3.0835	2.46825	unchanged	O14772;O14772-2;E9PK10;E9PMK0;E9PMM4;A6NHC7;E9PKE1;H0YDF0;A0A3B3ITB1;Q59H18-3;Q59H18-4;Q59H18-1;V9GXZ4;O14772-3	Fucose-1-phosphate guanylyltransferase	FPGT;FPGT-TNNI3K
	459	ENSG00000007402	0.476933	4.11919	3.23188	unchanged	Q9NY47;C9JE82;Q9NY47-2	Voltage-dependent calcium channel subunit alpha-2/delta-2;Voltage-dependent calcium channel subunit alpha-2-2;Voltage-dependent calcium channel subunit delta-2	CACNA2D2
	460	ENSG00000183336	0.476833	4.36251	3.40718	unchanged	A0A087WZT3;H3BTW0;A0A0B4J295	NA	NA
	461	ENSG00000198431	0.4768	4.29499	3.36204	unchanged	Q16881-3;Q16881;Q16881-4;A0A087WSY9;A0A087WSW9;E9PIR7;Q16881-6;Q16881-2;Q16881-5;A0A182DWI3;F8W809;E2QRB9;Q16881-7	Thioredoxin reductase 1, cytoplasmic	TXNRD1
	462	ENSG00000125746	0.476	5	3.86713	unchanged	O95834-3;O95834;K7EIK7;O95834-2;A0A0C4DGQ7;C9JRL6	Echinoderm microtubule-associated protein-like 2	EML2
	463	ENSG00000147471	0.475567	4.84466	3.75424	unchanged	O94903;E5RFX7;E5RG77	Proline synthase co-transcribed bacterial homolog protein	PROSC
	464	ENSG00000115271	0.475467	4.78516	3.7177	unchanged	P28676;H7BXD5;H7C2Z6;C9JIZ3	Grancalcin	GCA
	465	ENSG00000148824	0.475333	3.91303	3.0806	unchanged	Q9BT17;U3KQ69;E7EVK2;Q9BT17-2	Mitochondrial ribosome-associated GTPase 1;Mitochondrial GTPase 1	MTG1
	466	ENSG00000147100	0.475267	3.29131	2.61537	unchanged	P36021	Monocarboxylate transporter 8	SLC16A2
	467	ENSG00000092094	0.4741	2.65999	2.15657	unchanged	Q9NPF4	Probable tRNA N6-adenosine threonylcarbamoyltransferase	OSGEP
	468	ENSG00000147231	0.474067	3.89023	3.06235	unchanged	Q6NSI4;Q6NSI4-2;Q6NSI4-4	Uncharacterized protein CXorf57	CXorf57
	469	ENSG00000146476	0.473933	3.04542	2.44008	unchanged	Q9H993;F5GZY1	Protein-glutamate O-methyltransferase	ARMT1
	470	ENSG00000185838	0.4738	4.01457	3.15827	unchanged	Q9BYB4;Q9BYB4-2	Guanine nucleotide-binding protein subunit beta-like protein 1	GNB1L
	471	ENSG00000135090	0.473267	4.5376	3.53739	unchanged	Q9H2K8;G3V1Q8	Serine/threonine-protein kinase TAO3	TAOK3
	472	ENSG00000145979	0.472467	3.05914	2.44993	unchanged	Q9P0N9;Q5SZL3;U3KPS8;Q5SZL5;Q5SZL6;Q5SZL4;Q9P0N9-3;Q9P0N9-4;Q9P0N9-2;Q5SZL8;Q5SZM2;U3KQD8;Q5SZM1;U3KPY5;B4DK47	TBC1 domain family member 7	TBC1D7
	473	ENSG00000174446	0.472467	4.85699	3.76439	unchanged	O75971;H3BQA0;H3BSI3;O75971-2	snRNA-activating protein complex subunit 5	SNAPC5
	474	ENSG00000124275	0.4722	3.75997	2.96634	unchanged	Q9UBK8;Q9UBK8-1	Methionine synthase reductase	MTRR
	475	ENSG00000107077	0.470567	2.6928	2.17995	unchanged	Q9H3R0;C9J879;Q9H3R0-3;Q9H3R0-4;Q9H3R0-2	Lysine-specific demethylase 4C	KDM4C
	476	ENSG00000119640	0.4704	3.01281	2.41685	unchanged	P07311;G3V2U7	Acylphosphatase-1;Acylphosphatase	ACYP1
	477	ENSG00000101347	0.470367	3.98027	3.13263	unchanged	Q9Y3Z3;Q9Y3Z3-4;A0A2R8YCS7;Q9Y3Z3-3;A0A2R8YD90	Deoxynucleoside triphosphate triphosphohydrolase SAMHD1	SAMHD1
	478	ENSG00000163281	0.4701	4.06449	3.19343	unchanged	Q8TDQ7;Q8TDQ7-3;Q8TDQ7-2;Q8TDQ7-4;Q8TDQ7-5	Glucosamine-6-phosphate isomerase 2	GNPDA2
	479	ENSG00000101901	0.469767	3.70197	2.9249	unchanged	A0A096LP10;Q9NP73-2;Q9NP73;A0A087WT15;A0A096LNJ4;A0A087WX43;A0A096LNL2;D6RE84;A0A087WTT9;A0A1B0GVW6	Putative bifunctional UDP-N-acetylglucosamine transferase and deubiquitinase ALG13	ALG13
	480	ENSG00000108932	0.467767	3.75745	2.96486	unchanged	O15403;A0A087WX92	Monocarboxylate transporter 7	SLC16A6
	481	ENSG00000175445	0.467067	4.15366	3.25838	unchanged	P06858;E7EW14;E5RJI0	Lipoprotein lipase	LPL
	482	ENSG00000205356	0.466767	3.93866	3.1016	unchanged	Q7Z6L1;Q7Z6L1-2;Q7Z6L1-4;Q7Z6L1-3	Tectonin beta-propeller repeat-containing protein 1	TECPR1
	483	ENSG00000103544	0.465333	4.40894	3.43981	unchanged	Q7Z3J2;F5H7K1;E7EWW0;C9J7I2;Q7Z3J2-2;H3BV68;H3BVG8	UPF0505 protein C16orf62	C16orf62
	484	ENSG00000177732	0.463933	3.4369	2.72882	unchanged	O15370	Transcription factor SOX-12	SOX12
	485	ENSG00000084207	0.4636	1.96101	1.61366	unchanged	P09211;A8MX94	Glutathione S-transferase P	GSTP1
	486	ENSG00000115685	0.463133	4.59346	3.57515	unchanged	Q15435;H7C003;C9JD73;B5MBZ8;C9J177;Q15435-3;Q15435-2	Protein phosphatase 1 regulatory subunit 7	PPP1R7
	487	ENSG00000054148	0.462933	2.25264	1.84387	unchanged	Q9NRX4;Q9NRX4-2	14 kDa phosphohistidine phosphatase	PHPT1
	488	ENSG00000144744	0.4609	3.14263	2.50965	unchanged	Q8TBC4;Q8TBC4-2;F8W8D4	NEDD8-activating enzyme E1 catalytic subunit	UBA3
	489	ENSG00000180329	0.460233	3.63958	2.87939	unchanged	Q96MW1;Q86WV7;Q96MW1-2	Coiled-coil domain-containing protein 43	CCDC43
	490	ENSG00000173163	0.460167	3.72971	2.94367	unchanged	Q8N668;Q8N668-2	COMM domain-containing protein 1	COMMD1
	491	ENSG00000125352	0.460033	4.91364	3.80358	unchanged	O15541	RING finger protein 113A	RNF113A
	492	ENSG00000069482	0.457667	3.48656	2.76297	unchanged	P22466	Galanin peptides;Galanin;Galanin message-associated peptide	GAL
	493	ENSG00000130779	0.457067	3.98534	3.13651	unchanged	P30622-2;J3KP58	CAP-Gly domain-containing linker protein 1	CLIP1
	494	ENSG00000162959	0.456667	4.54516	3.54306	unchanged	Q9Y316;Q9Y316-2;Q9Y316-3	Protein MEMO1	MEMO1
	495	ENSG00000109787	0.4563	1.5966	1.3236	unchanged	P57682;P57682-2	Krueppel-like factor 3	KLF3
	496	ENSG00000151116	0.455933	3.5908	2.84299	unchanged	Q8IX04;Q8IX04-4;Q8IX04-3;Q8IX04-2;Q8IX04-6;Q8IX04-7	Ubiquitin-conjugating enzyme E2 variant 3	UEVLD
	497	ENSG00000139684	0.4559	4.56225	3.5559	unchanged	P10768;X6RA14;H7BZT7;U3KQT1	S-formylglutathione hydrolase	ESD
	498	ENSG00000188243	0.455667	3.94189	3.10405	unchanged	Q7Z4G1;Q7Z4G1-2;B0QZ40	COMM domain-containing protein 6	COMMD6
	499	ENSG00000168397	0.455267	3.53363	2.79887	unchanged	Q9Y4P1;Q9Y4P1-6;Q9Y4P1-2;C9JIK8;Q9Y4P1-4	Cysteine protease ATG4B	ATG4B
	500	ENSG00000157353	0.4551	3.79287	2.98824	unchanged	Q8N0W3;Q8N0W3-2;J3KSP6	L-fucose kinase	FUK
	501	ENSG00000204899	0.455033	1.6944	1.40251	unchanged	Q08AG7	Mitotic-spindle organizing protein 1	MZT1
	502	ENSG00000085433	0.4549	3.69925	2.92355	unchanged	O94967;A0A0A0MRE6;O94967-2;O94967-3;O94967-4	WD repeat-containing protein 47	WDR47
	503	ENSG00000166788	0.454867	3.43724	2.72887	unchanged	Q96ER3;J3KND1;E9PRZ1	Protein SAAL1	SAAL1
	504	ENSG00000135333	0.454533	4.41341	3.44301	unchanged	Q15375;Q15375-2;Q15375-4	Ephrin type-A receptor 7	EPHA7
	505	ENSG00000146067	0.453933	3.4546	2.74044	unchanged	Q96PV7;H0YCX2;Q96PV7-2;Q96PV7-3;H0Y9G1	Protein FAM193B	FAM193B
	506	ENSG00000101574	0.453867	3.16111	2.52098	unchanged	Q8N3J2;J3KNJ7	Methyltransferase-like protein 4	METTL4
	507	ENSG00000134285	0.4531	4.35262	3.4002	unchanged	Q9NYL4;F8VU90;Q9NYL4-2	Peptidyl-prolyl cis-trans isomerase FKBP11;Peptidyl-prolyl cis-trans isomerase	FKBP11
	508	ENSG00000165572	0.4527	3.18744	2.54268	unchanged	Q86V97	Kelch repeat and BTB domain-containing protein 6	KBTBD6
	509	ENSG00000100865	0.452267	4.39577	3.43182	unchanged	Q9BW66;H0YKY0;H0YN33;Q9BW66-2;Q9BW66-3	Cyclin-dependent kinase 2-interacting protein	CINP
	510	ENSG00000078237	0.451867	3.07891	2.46502	unchanged	Q9NQ88;A0A0U1RQD1	Fructose-2,6-bisphosphatase TIGAR	TIGAR
	511	ENSG00000132002	0.451267	2.42725	1.98	unchanged	P25685;P25685-2;M0R080	DnaJ homolog subfamily B member 1	DNAJB1
	512	ENSG00000189241	0.451233	3.38917	2.69385	unchanged	Q9H0U9	Testis-specific Y-encoded-like protein 1	TSPYL1
	513	ENSG00000102081	0.4502	2.47401	2.01347	unchanged	Q06787;Q06787-5;Q06787-3;Q06787-8;Q06787-9;Q06787-10;Q06787-11;R9WNI0	Fragile X mental retardation protein 1	FMR1
	514	ENSG00000015475	0.449067	2.80209	2.26236	unchanged	P55957;P55957-2	BH3-interacting domain death agonist;BH3-interacting domain death agonist p15;BH3-interacting domain death agonist p13;BH3-interacting domain death agonist p11	BID
	515	ENSG00000067057	0.4484	4.77728	3.71352	unchanged	Q01813;Q01813-2;B1APP6	ATP-dependent 6-phosphofructokinase, platelet type	PFKP
	516	ENSG00000165240	0.4484	4.7986	3.72774	unchanged	Q04656;Q04656-5;Q04656-2;Q04656-3	Copper-transporting ATPase 1	ATP7A
	517	ENSG00000106524	0.447867	4.82974	3.74603	unchanged	Q8IV38;G3V0G5	Ankyrin repeat and MYND domain-containing protein 2	ANKMY2
	518	ENSG00000174177	0.447733	3.62114	2.86409	unchanged	Q2VPK5;H3BSW6;Q2VPK5-3;Q2VPK5-5	Cytoplasmic tRNA 2-thiolation protein 2	CTU2
	519	ENSG00000175931	0.4469	4.10237	3.21978	unchanged	Q9C0C9	E2/E3 hybrid ubiquitin-protein ligase UBE2O	UBE2O
	520	ENSG00000082153	0.4466	3.45889	2.74327	unchanged	Q7L1Q6;Q7L1Q6-4;Q7L1Q6-3;Q7L1Q6-2;C9IZ80;C9JFN4	Basic leucine zipper and W2 domain-containing protein 1	BZW1
	521	ENSG00000143256	0.4461	2.95522	2.3748	unchanged	Q9UHV9	Prefoldin subunit 2	PFDN2
	522	ENSG00000177432	0.445467	4.07417	3.19969	unchanged	Q96NT1	Nucleosome assembly protein 1-like 5	NAP1L5
	523	ENSG00000022277	0.445267	4.37469	3.41708	unchanged	Q9BY42;A0A0A0MQR2;A2A2L5;A2A2L6	Protein RTF2 homolog	RTFDC1
	524	ENSG00000072786	0.445133	4.8962	3.79155	unchanged	O94804	Serine/threonine-protein kinase 10	STK10
	525	ENSG00000106299	0.444633	4.06098	3.19132	unchanged	O00401	Neural Wiskott-Aldrich syndrome protein	WASL
	526	ENSG00000124588	0.444467	3.63655	2.87757	unchanged	P16083;Q5TD05;Q5TD07	Ribosyldihydronicotinamide dehydrogenase [quinone]	NQO2
	527	ENSG00000112941	0.4437	1.96659	1.61824	unchanged	Q5XG87;A0A0X1KG68;Q5XG87-2	Non-canonical poly(A) RNA polymerase PAPD7	PAPD7
	528	ENSG00000147872	0.443533	4.67572	3.63395	unchanged	Q99541;Q5SYF5	Perilipin-2	PLIN2
	529	ENSG00000148484	0.443433	3.41402	2.71109	unchanged	Q15404;Q15404-2	Ras suppressor protein 1	RSU1
	530	ENSG00000140400	0.4429	3.70775	2.92863	unchanged	Q9NTJ4;Q9NTJ4-3;Q9NTJ4-2;Q9NTJ4-4	Alpha-mannosidase 2C1	MAN2C1
	531	ENSG00000068903	0.4425	4.04239	3.17838	unchanged	Q8IXJ6;Q8IXJ6-2;F8WCF4;C9JZQ0;B5MCS1;A0A0A0MRF5;E7EWX6;A0A087WYM3;Q8IXJ6-4;Q8IXJ6-3;C9JR33;C9J3U7;F8WF57;F8WDM4;Q8IXJ6-5	NAD-dependent protein deacetylase sirtuin-2	SIRT2
	532	ENSG00000137822	0.441467	3.16077	2.52098	unchanged	Q9UGJ1;Q9UGJ1-2;H3BPU4	Gamma-tubulin complex component 4	TUBGCP4
	533	ENSG00000161204	0.440633	3.93758	3.10091	unchanged	Q9NUQ8;Q9NUQ8-2	ATP-binding cassette sub-family F member 3	ABCF3
	534	ENSG00000050344	0.440233	2.29017	1.87382	unchanged	Q9Y4A8	Nuclear factor erythroid 2-related factor 3	NFE2L3
	535	ENSG00000070669	0.439967	3.49672	2.77074	unchanged	P08243;P08243-2;F8WEJ5	Asparagine synthetase [glutamine-hydrolyzing]	ASNS
	536	ENSG00000140350	0.439467	3.15334	2.51597	unchanged	P39687;H0YN26	Acidic leucine-rich nuclear phosphoprotein 32 family member A	ANP32A
	537	ENSG00000213465	0.438967	3.76305	2.96837	unchanged	P36404;V9GYD0;P36404-2	ADP-ribosylation factor-like protein 2	ARL2;ARL2-SNX15
	538	ENSG00000035687	0.4384	3.70745	2.92863	unchanged	P30520	Adenylosuccinate synthetase isozyme 2	ADSS
	539	ENSG00000049167	0.4382	3.67942	2.90864	unchanged	Q13216	DNA excision repair protein ERCC-8	ERCC8
	540	ENSG00000142684	0.437967	4.81248	3.73634	unchanged	O00488;A9J4F5	Zinc finger protein 593	ZNF593
	541	ENSG00000140577	0.437433	4.38934	3.427	unchanged	Q6UUV7;Q6UUV7-3	CREB-regulated transcription coactivator 3	CRTC3
	542	ENSG00000156508	0.437233	4.65758	3.62064	unchanged	P68104;Q5VTE0;A0A087WVQ9;P68104-2;A0A087WV01	Elongation factor 1-alpha 1;Putative elongation factor 1-alpha-like 3;Elongation factor 1-alpha	EEF1A1;EEF1A1P5
	543	ENSG00000148773	0.437033	1.78638	1.47716	unchanged	P46013;P46013-2	Antigen KI-67	MKI67
	544	ENSG00000169019	0.437033	3.88558	3.05885	unchanged	Q9NX08	COMM domain-containing protein 8	COMMD8
	545	ENSG00000169504	0.436833	3.32861	2.64486	unchanged	Q9Y696	Chloride intracellular channel protein 4	CLIC4
	546	ENSG00000154229	0.436333	3.56997	2.8261	unchanged	P17252;J3KRN5	Protein kinase C alpha type	PRKCA
	547	ENSG00000110046	0.435267	3.77516	2.97695	unchanged	Q2TAZ0;Q2TAZ0-3;H7C3T2	Autophagy-related protein 2 homolog A	ATG2A
	548	ENSG00000134369	0.434967	4.48945	3.50037	unchanged	Q8NEY1;Q8NEY1-2;Q8NEY1-3;Q8NEY1-5;A0A0A0MRJ3;Q8NEY1-7;Q8NEY1-4;Q8NEY1-6;H0Y6F6	Neuron navigator 1	NAV1
	549	ENSG00000106992	0.433767	3.31339	2.63289	unchanged	P00568;Q5T9B7	Adenylate kinase isoenzyme 1	AK1
	550	ENSG00000005469	0.433433	2.74146	2.21802	unchanged	Q9UKG9;Q9UKG9-3;C9J3D7	Peroxisomal carnitine O-octanoyltransferase	CROT
	551	ENSG00000099901	0.433167	3.0098	2.41523	unchanged	P43487;F6WQW2;P43487-2;C9JXG8;C9JJ34;C9JGV6	Ran-specific GTPase-activating protein	RANBP1
	552	ENSG00000151240	0.433133	4.49621	3.50393	unchanged	Q9Y2E4;E7EPU2;A0A0U1RQW6	Disco-interacting protein 2 homolog C	DIP2C
	553	ENSG00000102898	0.433	2.64717	2.14536	unchanged	P61970;H3BRV9	Nuclear transport factor 2	NUTF2
	554	ENSG00000125877	0.4324	2.97027	2.38512	unchanged	Q9BY32;Q9BY32-2;Q9BY32-3	Inosine triphosphate pyrophosphatase	ITPA
	555	ENSG00000137760	0.432	3.93502	3.09951	unchanged	Q96BT7;Q96BT7-4	Alkylated DNA repair protein alkB homolog 8	ALKBH8
	556	ENSG00000107263	0.4313	3.19273	2.54622	unchanged	Q13905;Q13905-2;Q13905-4;Q13905-3;H0Y6R4	Rap guanine nucleotide exchange factor 1	RAPGEF1
	557	ENSG00000255526	0.4312	1.62063	1.34189	unchanged	E9PL57;Q15843;F8VSA6;E9PS38;S4R3E9	NEDD8	NEDD8-MDP1;NEDD8
	558	ENSG00000100523	0.431	3.56983	2.8261	unchanged	Q8NEL9;A0A087X0H7;Q8NEL9-2;Q8NEL9-4	Phospholipase DDHD1	DDHD1
	559	ENSG00000113068	0.430533	3.59777	2.84902	unchanged	O60925;E5RGS4	Prefoldin subunit 1	PFDN1
	560	ENSG00000122435	0.4305	3.39718	2.69924	unchanged	Q9NUP7	tRNA:m(4)X modification enzyme TRM13 homolog	TRMT13
	561	ENSG00000130829	0.430333	3.77618	2.97762	unchanged	Q99956	Dual specificity protein phosphatase 9	DUSP9
	562	ENSG00000141295	0.4302	2.72613	2.20569	unchanged	Q96FV2;J3QL71;Q96FV2-2;J3KT79;J3QR84;J3QRJ1	Secernin-2	SCRN2
	563	ENSG00000100614	0.429733	2.69995	2.18489	unchanged	P35813;P35813-3;P35813-2	Protein phosphatase 1A	PPM1A
	564	ENSG00000142002	0.429233	3.5873	2.83981	unchanged	Q86TI2;Q86TI2-2;Q86TI2-4	Dipeptidyl peptidase 9	DPP9
	565	ENSG00000138363	0.428967	4.5817	3.56719	unchanged	P31939;P31939-2	Bifunctional purine biosynthesis protein PURH;Phosphoribosylaminoimidazolecarboxamide formyltransferase;IMP cyclohydrolase	ATIC
	566	ENSG00000043514	0.428833	2.637	2.13734	unchanged	Q9H3H1;Q9H3H1-4;Q9H3H1-5;S4R2Z0;Q9H3H1-3;Q9H3H1-2	tRNA dimethylallyltransferase, mitochondrial	TRIT1
	567	ENSG00000052850	0.4285	4.7167	3.66508	unchanged	Q9H161	Homeobox protein aristaless-like 4	ALX4
	568	ENSG00000075089	0.4284	3.69058	2.91713	unchanged	Q9GZN1;F8W057;G3V1Y1	Actin-related protein 6	ACTR6
	569	ENSG00000059122	0.428267	3.76869	2.97225	unchanged	Q4VC44;Q4VC44-2;Q4VC44-3;I3L188;J3KNW1;Q4VC44-4	FLYWCH-type zinc finger-containing protein 1	FLYWCH1
	570	ENSG00000105647	0.4274	2.52588	2.05383	unchanged	O00459;E9PFP1	Phosphatidylinositol 3-kinase regulatory subunit beta	PIK3R2
	571	ENSG00000145293	0.427167	2.93331	2.3578	unchanged	Q9UHY7	Enolase-phosphatase E1	ENOPH1
	572	ENSG00000149476	0.427167	3.82023	3.01055	unchanged	Q3LXA3;H0YCY6;Q3LXA3-2	Bifunctional ATP-dependent dihydroxyacetone kinase/FAD-AMP lyase (cyclizing);ATP-dependent dihydroxyacetone kinase;FAD-AMP lyase (cyclizing)	DAK;TKFC
	573	ENSG00000158109	0.4268	2.97188	2.38607	unchanged	Q5T0D9;Q5T0D9-2	Tumor protein p63-regulated gene 1-like protein	TPRG1L
	574	ENSG00000156136	0.4266	2.87575	2.31585	unchanged	P27707;D6RFG8;D6RCP9	Deoxycytidine kinase	DCK
	575	ENSG00000092148	0.4256	4.13787	3.24714	unchanged	Q9ULT8;H0YJP0	E3 ubiquitin-protein ligase HECTD1	HECTD1
	576	ENSG00000122642	0.425167	4.57349	3.56382	unchanged	O95302;O95302-3	Peptidyl-prolyl cis-trans isomerase FKBP9	FKBP9
	577	ENSG00000093217	0.4238	3.93521	3.09951	unchanged	O75191;A0A3B3IRM4;O75191-2;A0A3B3IS07	Xylulose kinase	XYLB
	578	ENSG00000187866	0.422767	3.38135	2.68733	unchanged	Q96E09;A0A590UJT9	Protein FAM122A	FAM122A
	579	ENSG00000113657	0.4222	4.36251	3.40718	unchanged	Q14195-2;Q14195	Dihydropyrimidinase-related protein 3	DPYSL3
	580	ENSG00000106682	0.421367	3.01103	2.41623	unchanged	Q15056	Eukaryotic translation initiation factor 4H	EIF4H
	581	ENSG00000102977	0.421067	4.28735	3.35674	unchanged	Q96AP0;A0A5F9ZCY9;A0A590TQL1;Q96AP0-2;R4GNJ5	Adrenocortical dysplasia protein homolog	ACD
	582	ENSG00000141556	0.4208	2.97328	2.38703	unchanged	Q9BTW9;J3KR97;Q9BTW9-4;Q9BTW9-5	Tubulin-specific chaperone D	TBCD
	583	ENSG00000071889	0.4197	4.0752	3.19969	unchanged	P98173-3;Q5HY75;D3DWX8;P98173-2;P98173;A6QRH7	Protein FAM3A	FAM3A
	584	ENSG00000120686	0.419667	3.41908	2.7153	unchanged	P61960;H0Y614;P61960-2	Ubiquitin-fold modifier 1	UFM1
	585	ENSG00000105379	0.419133	4.03292	3.17104	unchanged	P38117;P38117-2;M0QY67	Electron transfer flavoprotein subunit beta	ETFB
	586	ENSG00000203485	0.418333	3.30366	2.62558	unchanged	Q27J81;Q27J81-2;A0A0A0MQU1	Inverted formin-2	INF2
	587	ENSG00000164778	0.4175	2.52282	2.05157	unchanged	P19622	Homeobox protein engrailed-2	EN2
	588	ENSG00000183527	0.417433	2.27205	1.85965	unchanged	O95456;O95456-2	Proteasome assembly chaperone 1	PSMG1
	589	ENSG00000143155	0.417433	4.55909	3.55454	unchanged	O75663;O75663-2	TIP41-like protein	TIPRL
	590	ENSG00000187840	0.4171	2.84628	2.29489	unchanged	Q13541	Eukaryotic translation initiation factor 4E-binding protein 1	EIF4EBP1
	591	ENSG00000110315	0.416967	3.19866	2.5514	unchanged	Q8WVD5;E9PLX2;E9PQV2;E9PNF8	RING finger protein 141	RNF141
	592	ENSG00000094841	0.416567	2.2856	1.86998	unchanged	Q96BW1;E9PSD7;A0A0A0MRR5;Q96BW1-3;A0A494C0H3	Uracil phosphoribosyltransferase homolog	UPRT
	593	ENSG00000152942	0.416567	4.18575	3.28139	unchanged	O75943;A0A0G2JPT5;O75943-2;A0A0G2JP78;O75943-4;D6RAW6;A0A0G2JNH5;O75943-3	Cell cycle checkpoint protein RAD17	RAD17
	594	ENSG00000079805	0.416467	1.93863	1.59614	unchanged	P50570-4;P50570-3	Dynamin-2	DNM2
	595	ENSG00000112062	0.4159	4.81248	3.73595	unchanged	Q16539-2;Q16539;B4E0K5;Q16539-3;E7EX54;Q16539-5;Q16539-4	Mitogen-activated protein kinase 14	MAPK14
	596	ENSG00000198276	0.415867	3.08478	2.46825	unchanged	Q9NWZ5;Q9NWZ5-4;Q9NWZ5-3;Q9NWZ5-2	Uridine-cytidine kinase-like 1	UCKL1
	597	ENSG00000176783	0.415867	3.50606	2.77857	unchanged	Q96T51;Q96T51-2;Q96T51-3	RUN and FYVE domain-containing protein 1	RUFY1
	598	ENSG00000104979	0.415633	3.7022	2.9249	unchanged	Q9UNZ5;K7ESE5;A0A0A0MQS3	Leydig cell tumor 10 kDa protein homolog	C19orf53
	599	ENSG00000165055	0.4156	3.17928	2.53651	unchanged	Q6P1Q9;Q96IZ6;Q6P1Q9-2	Methyltransferase-like protein 2B;Methyltransferase-like protein 2A	METTL2B;METTL2A
	600	ENSG00000015676	0.414533	4.28483	3.35563	unchanged	Q8IVD9	NudC domain-containing protein 3	NUDCD3
	601	ENSG00000160213	0.4138	2.5282	2.05525	unchanged	P04080;A0A1W2PQG6	Cystatin-B	CSTB
	602	ENSG00000004399	0.413	3.84951	3.03176	unchanged	Q9Y4D7;Q9Y4D7-2	Plexin-D1	PLXND1
	603	ENSG00000271303	0.411967	4.4698	3.48579	unchanged	Q9BYN0	Sulfiredoxin-1	SRXN1
	604	ENSG00000255529	0.410967	2.07616	1.70591	unchanged	Q6EEV4;Q6EEV4-2	DNA-directed RNA polymerase II subunit GRINL1A, isoforms 4/5	POLR2M
	605	ENSG00000066427	0.410933	3.19149	2.54523	unchanged	P54252;G3V4U9;A0A2R8Y3X7;G3V3R7;A0A087X1A8;A0A0A0MS38;D3VVH9;P54252-1;P54252-4;F5H211;A0A087WXY4;S4R399;P54252-3;G3V2G2;P54252-5;G3V526;G3V2G1;E9PJN5;C9JQV6;G3V328	Ataxin-3	ATXN3
	606	ENSG00000172053	0.4108	4.4828	3.49454	unchanged	P47897;P47897-2	Glutamine--tRNA ligase	QARS
	607	ENSG00000138629	0.410233	3.20379	2.55454	unchanged	Q96S82;H3BV23;H3BUV9	Ubiquitin-like protein 7	UBL7
	608	ENSG00000168496	0.4102	3.44613	2.73459	unchanged	P39748;P39748-2	Flap endonuclease 1	FEN1
	609	ENSG00000013374	0.4102	3.55288	2.81395	unchanged	Q9Y5A7;H3BM14;H3BM74;Q9Y5A7-2;F8WDB6;C9JRT6	NEDD8 ultimate buster 1	NUB1
	610	ENSG00000009335	0.4098	3.81686	3.00826	unchanged	Q15386	Ubiquitin-protein ligase E3C	UBE3C
	611	ENSG00000149929	0.4081	2.74068	2.21761	unchanged	Q9BW71;Q9BW71-2	HIRA-interacting protein 3	HIRIP3
	612	ENSG00000085224	0.408067	3.51881	2.7877	unchanged	P46100;P46100-4;P46100-3;P46100-2;P46100-5;A0A096LNL9;P46100-6	Transcriptional regulator ATRX	ATRX
	613	ENSG00000203879	0.407767	3.61106	2.85786	unchanged	P31150	Rab GDP dissociation inhibitor alpha	GDI1
	614	ENSG00000135766	0.407733	3.65762	2.89442	unchanged	Q9GZT9;Q9GZT9-2;Q9GZT9-3	Egl nine homolog 1	EGLN1
	615	ENSG00000116106	0.407333	4.07109	3.19872	unchanged	P54764;E9PG71;P54764-2	Ephrin type-A receptor 4;Receptor protein-tyrosine kinase	EPHA4
	616	ENSG00000134109	0.4062	3.822	3.01139	unchanged	Q92611;Q92611-2	ER degradation-enhancing alpha-mannosidase-like protein 1	EDEM1
	617	ENSG00000114021	0.406167	3.37421	2.68167	unchanged	Q9NQR4;H7C579	Omega-amidase NIT2	NIT2
	618	ENSG00000105221	0.4058	1.95491	1.60835	unchanged	P31751;M0R0P9;J3QKW1;P31751-2	RAC-beta serine/threonine-protein kinase	AKT2
	619	ENSG00000075142	0.405533	3.29312	2.61638	unchanged	P30626;C9J0K6;P30626-2;P30626-3;B4DHQ6	Sorcin	SRI
	620	ENSG00000186871	0.405333	3.70267	2.9249	unchanged	Q2NKX8;B5MDQ0	DNA excision repair protein ERCC-6-like	ERCC6L
	621	ENSG00000171097	0.404967	3.06538	2.45433	unchanged	Q16773;A0A494C066;B7Z4W5;Q16773-2;Q5T278;Q16773-3	Kynurenine--oxoglutarate transaminase 1	CCBL1
	622	ENSG00000146733	0.404567	3.03895	2.43577	unchanged	P78330;C9JBI3	Phosphoserine phosphatase	PSPH
	623	ENSG00000143179	0.404033	3.52637	2.79344	unchanged	Q9BZX2;A0A2R8Y653;Q9BZX2-2	Uridine-cytidine kinase 2	UCK2
	624	ENSG00000125633	0.403733	3.84709	3.02971	unchanged	Q567U6;F8W9X7	Coiled-coil domain-containing protein 93	CCDC93
	625	ENSG00000169967	0.403567	2.77225	2.24161	unchanged	Q9Y2U5	Mitogen-activated protein kinase kinase kinase 2	MAP3K2
	626	ENSG00000112514	0.403133	2.2429	1.83666	unchanged	O60888;O60888-3;O60888-2;C9IZG4	Protein CutA	CUTA
	627	ENSG00000102996	0.4014	3.71982	2.93794	unchanged	P51511	Matrix metalloproteinase-15	MMP15
	628	ENSG00000121064	0.400967	4.1798	3.27716	unchanged	Q9HB40;Q9HB40-2	Retinoid-inducible serine carboxypeptidase	SCPEP1
	629	ENSG00000120837	0.4006	1.67274	1.38481	unchanged	P25208;F8VSL3	Nuclear transcription factor Y subunit beta	NFYB
	630	ENSG00000168078	0.399667	3.7383	2.94815	unchanged	Q96KB5;Q96KB5-2;E5RFX4	Lymphokine-activated killer T-cell-originated protein kinase	PBK
	631	ENSG00000129315	0.399333	3.0483	2.44194	unchanged	O60563	Cyclin-T1	CCNT1
	632	ENSG00000100883	0.399267	4.21183	3.29781	unchanged	P61011;P61011-2;G3V4F7	Signal recognition particle 54 kDa protein	SRP54
	633	ENSG00000120860	0.398933	3.37469	2.68187	unchanged	Q9Y3C0;F5GZ97;H0YGN0;F5GWI9;F5GXZ7	WASH complex subunit CCDC53	CCDC53
	634	ENSG00000166140	0.3984	4.20831	3.29649	unchanged	Q96K21;H3BRF9;Q96K21-4;Q96K21-2;Q96K21-3;H3BN64	Abscission/NoCut checkpoint regulator	ZFYVE19
	635	ENSG00000112242	0.398367	3.21271	2.55961	unchanged	O00716;O00716-2	Transcription factor E2F3	E2F3
	636	ENSG00000188647	0.397767	3.41293	2.71057	unchanged	Q7Z6K3;X6R9N0	Protein prenyltransferase alpha subunit repeat-containing protein 1	PTAR1
	637	ENSG00000163754	0.3975	2.94534	2.3675	unchanged	P46976;P46976-2;C9JQ42;P46976-3;G5E9W8	Glycogenin-1	GYG1
	638	ENSG00000106780	0.3975	4.06298	3.19293	unchanged	Q9H1U4	Multiple epidermal growth factor-like domains protein 9	MEGF9
	639	ENSG00000101997	0.3973	4.40671	3.43882	unchanged	O60826	Coiled-coil domain-containing protein 22	CCDC22
	640	ENSG00000031823	0.396867	4.13847	3.24714	unchanged	Q9H6Z4-2;B7Z7F3	Ran-binding protein 3	RANBP3
	641	ENSG00000167815	0.396833	2.10352	1.72714	unchanged	P32119;A6NIW5	Peroxiredoxin-2	PRDX2
	642	ENSG00000100417	0.3968	3.97744	3.13158	unchanged	Q92871	Phosphomannomutase 1	PMM1
	643	ENSG00000177303	0.3964	3.65095	2.88873	unchanged	Q8WXE0;Q8WXE0-2	Caskin-2	CASKIN2
	644	ENSG00000129317	0.3962	3.48774	2.76355	unchanged	Q9H0K6;F8VP66;F8VW99;F8VZA0;Q9H0K6-2	Pseudouridylate synthase 7 homolog-like protein	PUS7L
	645	ENSG00000064726	0.395567	4.33348	3.3879	unchanged	Q9H0C5;Q9H0C5-2	BTB/POZ domain-containing protein 1	BTBD1
	646	ENSG00000136560	0.395033	1.55619	1.2927	unchanged	Q92844;E7EQA9;E7EWR8;E7EM55;E7ERM9;E7EV32;E7EMT6;E7ENY2;H7BZ28;E7EVA2;E7EW82;H7C3L4;Q92844-2;Q92844-3	TRAF family member-associated NF-kappa-B activator	TANK
	647	ENSG00000153774	0.394833	3.8028	2.99637	unchanged	Q9UEE9;Q9UEE9-2	Craniofacial development protein 1	CFDP1
	648	ENSG00000184205	0.394567	4.37469	3.41708	unchanged	Q9H2G4;J3KST2;J3KS33	Testis-specific Y-encoded-like protein 2	TSPYL2
	649	ENSG00000167461	0.3943	4.46092	3.47992	unchanged	P61006;P61006-2	Ras-related protein Rab-8A	RAB8A
	650	ENSG00000111144	0.3937	3.71007	2.9299	unchanged	P09960;P09960-2	Leukotriene A-4 hydrolase	LTA4H
	651	ENSG00000162734	0.393433	3.77206	2.9746	unchanged	Q15121;B1AKZ5;Q15121-2	Astrocytic phosphoprotein PEA-15	PEA15
	652	ENSG00000011347	0.393067	2.40859	1.96552	unchanged	O43581;O43581-6;O43581-2;O43581-5;O43581-4;O43581-3	Synaptotagmin-7	SYT7
	653	ENSG00000133104	0.392967	3.83469	3.02062	unchanged	Q8N0X7	Spartin	SPG20
	654	ENSG00000048707	0.3927	3.57485	2.82987	unchanged	Q5THJ4;Q5THJ4-2;H3BLS7	Vacuolar protein sorting-associated protein 13D	VPS13D
	655	ENSG00000085231	0.391867	3.53795	2.80196	unchanged	Q9Y3D8;A0A087WVD7;Q9Y3D8-2;D6RDH4	Adenylate kinase isoenzyme 6	AK6;TAF9
	656	ENSG00000158019	0.3916	3.72682	2.94223	unchanged	Q9NXR7;Q9NXR7-4;Q9NXR7-3;Q9NXR7-1;F8W733;C9J2G0	BRCA1-A complex subunit BRE	BRE
	657	ENSG00000132604	0.391433	4.46092	3.47992	unchanged	Q15554;H3BR06	Telomeric repeat-binding factor 2	TERF2
	658	ENSG00000168172	0.391233	3.7608	2.96682	unchanged	Q86VS8	Protein Hook homolog 3	HOOK3
	659	ENSG00000100226	0.3906	4.58838	3.57145	unchanged	O00178	GTP-binding protein 1	GTPBP1
	660	ENSG00000172954	0.390267	4.11976	3.23255	unchanged	Q6UWP7;Q6UWP7-3	Lysocardiolipin acyltransferase 1	LCLAT1
	661	ENSG00000101843	0.3897	4.03292	3.17104	unchanged	O75832;B1AJY7;B1AJY5	26S proteasome non-ATPase regulatory subunit 10	PSMD10
	662	ENSG00000134046	0.389067	4.1549	3.25917	unchanged	Q9UBB5	Methyl-CpG-binding domain protein 2	MBD2
	663	ENSG00000111674	0.389033	3.14498	2.51005	unchanged	P09104;P09104-2;F5H0C8	Gamma-enolase;Enolase	ENO2
	664	ENSG00000153037	0.388867	2.71583	2.1976	unchanged	P09132;A0A087WYR0;A0A087WWU9;A0A2U3TZN1	Signal recognition particle 19 kDa protein	SRP19
	665	ENSG00000166025	0.3888	4.35262	3.4002	unchanged	Q8IY63;Q8IY63-2	Angiomotin-like protein 1	AMOTL1
	666	ENSG00000133112	0.388367	4.14569	3.25229	unchanged	P13693;Q5W0H4;A0A0B4J2C3;J3KPG2;E9PJF7;P13693-2	Translationally-controlled tumor protein	TPT1
	667	ENSG00000111481	0.388233	2.19031	1.79356	unchanged	P61923;F8VVA7;P61923-4;F8VXB1;F8W156;F8W651;F8VYZ4;P61923-5;F8VUC5;F8VXR1	Coatomer subunit zeta-1	COPZ1
	668	ENSG00000170142	0.387967	4.14267	3.25018	unchanged	P51965;P51965-3;C9J2P0;H7C061;P51965-2;B7Z306	Ubiquitin-conjugating enzyme E2 E1	UBE2E1
	669	ENSG00000164105	0.3871	2.83814	2.28935	unchanged	O75446	Histone deacetylase complex subunit SAP30	SAP30
	670	ENSG00000105649	0.386967	3.87045	3.04747	unchanged	P20336;S4R3Q3	Ras-related protein Rab-3A	RAB3A
	671	ENSG00000104679	0.386833	4.36452	3.40741	unchanged	Q9Y3T6;A0A0R4J2E2;A0A0D9SF44;Q9Y3T6-3;H0YBU3;A0A0D9SG39;E5RHX3;E5RIQ4	R3H and coiled-coil domain-containing protein 1	R3HCC1
	672	ENSG00000175602	0.386833	4.49349	3.50243	unchanged	Q15834	Coiled-coil domain-containing protein 85B	CCDC85B
	673	ENSG00000108344	0.386467	3.01227	2.41666	unchanged	O43242;O43242-2	26S proteasome non-ATPase regulatory subunit 3	PSMD3
	674	ENSG00000159210	0.3856	3.30185	2.62404	unchanged	Q96H20;Q96H20-2;D6RJ86;D6RFY6	Vacuolar-sorting protein SNF8	SNF8
	675	ENSG00000103591	0.3856	3.36627	2.67484	unchanged	Q6PD74	Alpha- and gamma-adaptin-binding protein p34	AAGAB
	676	ENSG00000184254	0.385467	2.97207	2.38607	unchanged	P47895;H0Y2X5	Aldehyde dehydrogenase family 1 member A3	ALDH1A3
	677	ENSG00000152127	0.3853	4.27165	3.34467	unchanged	Q09328	Alpha-1,6-mannosylglycoprotein 6-beta-N-acetylglucosaminyltransferase A	MGAT5
	678	ENSG00000103274	0.385267	3.23884	2.5789	unchanged	P53384;P53384-2	Cytosolic Fe-S cluster assembly factor NUBP1	NUBP1
	679	ENSG00000124641	0.384767	4.38934	3.427	unchanged	Q9H944;B7ZBQ3;A6PVP4;Q9H944-2	Mediator of RNA polymerase II transcription subunit 20	MED20
	680	ENSG00000018189	0.3844	3.54444	2.80722	unchanged	Q7L099-4;Q7L099;Q7L099-3;Q7L099-2	Protein RUFY3	RUFY3
	681	ENSG00000184524	0.3843	3.47773	2.7562	unchanged	Q8N111	Cell cycle exit and neuronal differentiation protein 1	CEND1
	682	ENSG00000159256	0.383767	3.55279	2.81395	unchanged	Q14149	MORC family CW-type zinc finger protein 3	MORC3
	683	ENSG00000182504	0.383433	3.62585	2.86849	unchanged	Q8IW35;Q8IW35-2;E9PG22	Centrosomal protein of 97 kDa	CEP97
	684	ENSG00000119878	0.383267	2.24056	1.83524	unchanged	Q9P021	Cysteine-rich PDZ-binding protein	CRIPT
	685	ENSG00000145041	0.383133	4.20204	3.29385	unchanged	Q9Y4B6;Q9Y4B6-2;Q9Y4B6-3	Protein VPRBP	VPRBP
	686	ENSG00000111229	0.382633	2.47637	2.01534	unchanged	O15145;C9JZD1	Actin-related protein 2/3 complex subunit 3	ARPC3
	687	ENSG00000134308	0.3824	3.57861	2.83301	unchanged	P27348;E9PG15	14-3-3 protein theta	YWHAQ
	688	ENSG00000162368	0.381767	2.85062	2.29742	unchanged	P30085;Q5T0D2;P30085-3	UMP-CMP kinase	CMPK1
	689	ENSG00000083844	0.381067	1.49244	1.23966	unchanged	O43296;Q5CZA5;Q5CZA5-2	Zinc finger protein 264;Zinc finger protein 805	ZNF264;ZNF805
	690	ENSG00000241360	0.381033	3.28784	2.61282	unchanged	Q96GD0	Pyridoxal phosphate phosphatase	PDXP
	691	ENSG00000103966	0.381	4.10018	3.2188	unchanged	Q9H223	EH domain-containing protein 4	EHD4
	692	ENSG00000135269	0.380533	4.20343	3.29476	unchanged	Q9UGI8;Q9UGI8-2	Testin	TES
	693	ENSG00000181588	0.379967	3.61246	2.85862	unchanged	Q86XN8;Q86XN8-3;S4R446;Q86XN8-2	RNA-binding protein MEX3D	MEX3D
	694	ENSG00000100714	0.379733	3.721	2.93844	unchanged	P11586;V9GYY3;A0A384N5Y3;F5H2F4;V9GZ78;A0A494C1T2	C-1-tetrahydrofolate synthase, cytoplasmic;Methylenetetrahydrofolate dehydrogenase;Methenyltetrahydrofolate cyclohydrolase;Formyltetrahydrofolate synthetase;C-1-tetrahydrofolate synthase, cytoplasmic, N-terminally processed	MTHFD1
	695	ENSG00000138794	0.378433	2.99136	2.40075	unchanged	P55212;P55212-2	Caspase-6;Caspase-6 subunit p18;Caspase-6 subunit p11	CASP6
	696	ENSG00000160767	0.3784	2.9561	2.37504	unchanged	P81408;P81408-3;P81408-4;P81408-2	Protein FAM189B	FAM189B
	697	ENSG00000269897	0.378267	3.89144	3.06319	unchanged	R4GMX3	NA	COMMD3-BMI1
	698	ENSG00000112531	0.378	3.22568	2.56915	unchanged	Q96PU8;Q96PU8-9;Q96PU8-8;Q96PU8-6;H0YG47;F5GXS8;F5GYM3;H0YGD6	Protein quaking	QKI
	699	ENSG00000196975	0.3779	2.88422	2.32186	unchanged	P09525;Q6P452;P09525-2	Annexin A4;Annexin	ANXA4
	700	ENSG00000100991	0.3778	3.74595	2.95442	unchanged	Q8TEL6;Q8TEL6-2;Q8TEL6-3	Short transient receptor potential channel 4-associated protein	TRPC4AP
	701	ENSG00000124217	0.377533	2.53505	2.06029	unchanged	O95396	Adenylyltransferase and sulfurtransferase MOCS3;Molybdopterin-synthase adenylyltransferase;Molybdopterin-synthase sulfurtransferase	MOCS3
	702	ENSG00000100376	0.377467	3.76641	2.97102	unchanged	Q9NWS6;Q9NWS6-2	Protein FAM118A	FAM118A
	703	ENSG00000050438	0.377433	2.95551	2.3748	unchanged	Q2Y0W8-2;Q2Y0W8;Q2Y0W8-4;Q2Y0W8-5;Q2Y0W8-3;Q2Y0W8-8;Q2Y0W8-6;Q2Y0W8-7	Electroneutral sodium bicarbonate exchanger 1	SLC4A8
	704	ENSG00000105011	0.377367	2.88837	2.32461	unchanged	Q9NVP2;K7ES22	Histone chaperone ASF1B	ASF1B
	705	ENSG00000196449	0.377167	2.32006	1.89795	unchanged	Q86U90	YrdC domain-containing protein, mitochondrial	YRDC
	706	ENSG00000065154	0.376267	1.55927	1.29484	unchanged	P04181	Ornithine aminotransferase, mitochondrial;Ornithine aminotransferase, hepatic form;Ornithine aminotransferase, renal form	OAT
	707	ENSG00000180098	0.3761	3.23385	2.57489	unchanged	Q9NX07;Q9NX07-2	tRNA selenocysteine 1-associated protein 1	TRNAU1AP
	708	ENSG00000158402	0.3761	4.01592	3.15912	unchanged	P30307;P30307-3;P30307-2;A0A3B3IT42;D6RJC2	M-phase inducer phosphatase 3	CDC25C
	709	ENSG00000214717	0.375633	3.85132	3.03245	unchanged	O96006	Zinc finger BED domain-containing protein 1	ZBED1
	710	ENSG00000173020	0.375333	3.54144	2.80515	unchanged	P25098	Beta-adrenergic receptor kinase 1	ADRBK1
	711	ENSG00000178950	0.3751	3.7896	2.98677	unchanged	O14976;O14976-2	Cyclin-G-associated kinase	GAK
	712	ENSG00000135842	0.374867	2.96256	2.37978	unchanged	Q9BZQ8	Protein Niban	FAM129A
	713	ENSG00000023697	0.374833	2.94969	2.37054	unchanged	Q9Y315;E9PPM8;G3V158;E9PML7	Deoxyribose-phosphate aldolase	DERA
	714	ENSG00000185963	0.374733	3.76128	2.96695	unchanged	Q8TD16;Q8TD16-2	Protein bicaudal D homolog 2	BICD2
	715	ENSG00000145375	0.373867	4.47366	3.4878	unchanged	Q8NB90;Q8NB90-2;Q8NB90-3	Spermatogenesis-associated protein 5	SPATA5
	716	ENSG00000131263	0.3732	4.04191	3.1783	unchanged	Q9NVW2;Q9NVW2-2	E3 ubiquitin-protein ligase RLIM	RLIM
	717	ENSG00000189308	0.373033	4.37779	3.41861	unchanged	Q6MZP7;Q6MZP7-2;Q6MZP7-3;Q6MZP7-4	Protein lin-54 homolog	LIN54
	718	ENSG00000106105	0.3728	3.65798	2.89445	unchanged	P41250	Glycine--tRNA ligase	GARS
	719	ENSG00000162623	0.3728	4.16685	3.26665	unchanged	Q6IPR3;Q6IPR3-2	tRNA wybutosine-synthesizing protein 3 homolog	TYW3
	720	ENSG00000166946	0.372767	3.60636	2.85504	unchanged	O95273;H3BR23;O95273-2;H3BQA6	Cyclin-D1-binding protein 1	CCNDBP1
	721	ENSG00000130706	0.372767	3.61973	2.86339	unchanged	Q16186	Proteasomal ubiquitin receptor ADRM1	ADRM1
	722	ENSG00000173812	0.371967	2.61509	2.12144	unchanged	P41567;K7EM18	Eukaryotic translation initiation factor 1	EIF1
	723	ENSG00000184083	0.3719	3.21272	2.55961	unchanged	Q9NX05;F8W881	Constitutive coactivator of PPAR-gamma-like protein 2	FAM120C
	724	ENSG00000169139	0.3718	2.10304	1.72679	unchanged	Q15819;E5RIF1;D6RG00;G3V113;H0YBX6	Ubiquitin-conjugating enzyme E2 variant 2	UBE2V2;UBE2V1
	725	ENSG00000131791	0.3718	2.89479	2.32905	unchanged	O43741;O43741-2	5-AMP-activated protein kinase subunit beta-2	PRKAB2
	726	ENSG00000213401	0.371467	3.81822	3.00926	unchanged	P43365	Melanoma-associated antigen 12	MAGEA12
	727	ENSG00000123143	0.371333	3.1713	2.52902	unchanged	Q16512;Q16512-2;Q16512-3	Serine/threonine-protein kinase N1	PKN1
	728	ENSG00000162735	0.371333	3.89356	3.06435	unchanged	P40855;Q5QNY5;P40855-5	Peroxisomal biogenesis factor 19	PEX19
	729	ENSG00000169410	0.370867	3.04207	2.43752	unchanged	P43378;A0A0A0MR09	Tyrosine-protein phosphatase non-receptor type 9;Protein-tyrosine-phosphatase	PTPN9
	730	ENSG00000103275	0.3708	3.47606	2.75543	unchanged	P63279;H3BQQ9;B0QYN7;H3BPC4	SUMO-conjugating enzyme UBC9	UBE2I
	731	ENSG00000130734	0.370767	3.73297	2.945	unchanged	Q86TL0;K7ESM7	Cysteine protease ATG4D;Cysteine protease ATG4D, mitochondrial	ATG4D
	732	ENSG00000134333	0.3701	2.78791	2.25284	unchanged	P00338;P00338-3;P00338-4;P00338-2;P00338-5	L-lactate dehydrogenase A chain	LDHA
	733	ENSG00000111667	0.370067	3.067	2.45549	unchanged	P45974;P45974-2	Ubiquitin carboxyl-terminal hydrolase 5	USP5
	734	ENSG00000172939	0.37	3.34781	2.66061	unchanged	O95747;C9JIG9	Serine/threonine-protein kinase OSR1	OXSR1
	735	ENSG00000171763	0.37	3.85574	3.03576	unchanged	Q9BVQ7;Q9BVQ7-2;Q9BVQ7-3	Spermatogenesis-associated protein 5-like protein 1	SPATA5L1
	736	ENSG00000152413	0.369867	2.88501	2.32245	unchanged	Q86YM7;Q86YM7-2;Q86YM6	Homer protein homolog 1	HOMER1
	737	ENSG00000213699	0.3697	4.09963	3.2188	unchanged	Q8N357;F8WCT7	Solute carrier family 35 member F6	SLC35F6
	738	ENSG00000101003	0.369633	2.79458	2.2568	unchanged	Q14691	DNA replication complex GINS protein PSF1	GINS1
	739	ENSG00000175595	0.369533	3.64069	2.88009	unchanged	Q92889	DNA repair endonuclease XPF	ERCC4
	740	ENSG00000152219	0.3695	2.16477	1.77309	unchanged	Q8N8R7;E9PRK7	ARL14 effector protein	ARL14EP
	741	ENSG00000066933	0.369467	4.05355	3.18786	unchanged	B2RTY4;B2RTY4-4;H3BRD5;B2RTY4-2;B2RTY4-5;H3BMM1	Unconventional myosin-IXa	MYO9A
	742	ENSG00000183605	0.369133	1.50675	1.25155	unchanged	Q6P4A7;Q6P4A7-2	Sideroflexin-4	SFXN4
	743	ENSG00000136100	0.3688	3.26757	2.5979	unchanged	Q86VN1;Q86VN1-2;A0A3B3ISW7	Vacuolar protein-sorting-associated protein 36	VPS36
	744	ENSG00000197275	0.368433	3.39376	2.69704	unchanged	Q9Y620;A0A087X0H2	DNA repair and recombination protein RAD54B	RAD54B
	745	ENSG00000198862	0.3683	3.83173	3.01876	unchanged	O94822;O94822-3;H7BYG8	E3 ubiquitin-protein ligase listerin	LTN1
	746	ENSG00000130560	0.3669	2.49072	2.02576	unchanged	Q9BSL1	Ubiquitin-associated domain-containing protein 1	UBAC1
	747	ENSG00000151503	0.366667	3.69655	2.92177	unchanged	P42695;G3V1A9;E9PKK4	Condensin-2 complex subunit D3	NCAPD3
	748	ENSG00000142197	0.366167	2.45662	2.0006	unchanged	Q9Y3R5;Q9Y3R5-2	Protein dopey-2	DOPEY2
	749	ENSG00000131153	0.366133	3.4581	2.74283	unchanged	Q9Y248	DNA replication complex GINS protein PSF2	GINS2
	750	ENSG00000141526	0.3661	2.54254	2.06537	unchanged	O15427	Monocarboxylate transporter 4	SLC16A3
	751	ENSG00000111678	0.366	2.77463	2.24283	unchanged	Q99622;U3KQ85;U3KQ07;F5GXW5	Protein C10	C12orf57
	752	ENSG00000125772	0.365667	2.26	1.84967	unchanged	Q9NPB8;H0Y565	Glycerophosphocholine phosphodiesterase GPCPD1	GPCPD1
	753	ENSG00000101811	0.365367	2.68255	2.17335	unchanged	P33240;E7EWR4;P33240-2;E9PID8;A0A0A0MT56	Cleavage stimulation factor subunit 2	CSTF2
	754	ENSG00000099942	0.3648	3.1319	2.50276	unchanged	P46109	Crk-like protein	CRKL
	755	ENSG00000104756	0.3647	2.73339	2.21163	unchanged	Q7L273	BTB/POZ domain-containing protein KCTD9	KCTD9
	756	ENSG00000109332	0.364067	3.80187	2.99616	unchanged	P61077;P62837;P61077-3;D6RFM0;D6RAH7;H9KV45;A0A0A0MQU3;A0A087WY85;P62837-2;P61077-2;D6RAW0	Ubiquitin-conjugating enzyme E2 D3;Ubiquitin-conjugating enzyme E2 D2	UBE2D3;UBE2D2
	757	ENSG00000168385	0.363833	3.34561	2.65952	unchanged	Q15019;Q15019-3;Q15019-2	Septin-2	SEPTIN2
	758	ENSG00000184640	0.363433	2.84816	2.29616	unchanged	Q9UHD8-5	Septin-9	SEPTIN9
	759	ENSG00000160959	0.363267	2.80915	2.26688	unchanged	Q15048;E9PNL0;E9PP40	Leucine-rich repeat-containing protein 14	LRRC14
	760	ENSG00000084070	0.362767	2.06306	1.69675	unchanged	Q8WU79;A0A087WV97;Q8WU79-2;X6RCC3;Q8WU79-3	Stromal membrane-associated protein 2	SMAP2
	761	ENSG00000204084	0.3624	3.34496	2.65952	unchanged	P32019;P32019-3;P32019-2;E7ESY0;P32019-4	Type II inositol 1,4,5-trisphosphate 5-phosphatase	INPP5B
	762	ENSG00000143942	0.3622	2.63962	2.13928	unchanged	Q8WUX2	Putative glutathione-specific gamma-glutamylcyclotransferase 2	CHAC2
	763	ENSG00000135002	0.362067	2.57779	2.09244	unchanged	Q969G6	Riboflavin kinase	RFK
	764	ENSG00000161057	0.360867	3.53166	2.79781	unchanged	P35998;P35998-2	26S protease regulatory subunit 7	PSMC2
	765	ENSG00000182287	0.3607	3.72617	2.94223	unchanged	P56377;A0A5F9ZHW1;F6SFB5	AP-1 complex subunit sigma-2	AP1S2
	766	ENSG00000112146	0.360667	3.26747	2.5979	unchanged	Q9UK97;Q9UK97-3;Q9UK97-2;V9GZ74;H7C4H6	F-box only protein 9	FBXO9
	767	ENSG00000123505	0.360567	2.40483	1.96229	unchanged	P17707;A0A5F9ZHD5;Q5VXN5	S-adenosylmethionine decarboxylase proenzyme;S-adenosylmethionine decarboxylase alpha chain;S-adenosylmethionine decarboxylase beta chain	AMD1
	768	ENSG00000116288	0.360433	2.89264	2.3278	unchanged	Q99497;K7ELW0;K7EN27	Protein deglycase DJ-1	PARK7
	769	ENSG00000168092	0.360267	2.92195	2.34961	unchanged	P68402;P68402-4;P68402-3;P68402-2	Platelet-activating factor acetylhydrolase IB subunit beta	PAFAH1B2
	770	ENSG00000184216	0.360267	3.46708	2.74896	unchanged	P51617;P51617-2;P51617-4;D3YTB5;P51617-3;H7C224;H7C2I6	Interleukin-1 receptor-associated kinase 1	IRAK1
	771	ENSG00000144724	0.36	3.68759	2.91515	unchanged	P23470;P23470-2	Receptor-type tyrosine-protein phosphatase gamma	PTPRG
	772	ENSG00000114999	0.3598	2.23261	1.82871	unchanged	Q8NG68	Tubulin--tyrosine ligase	TTL
	773	ENSG00000167508	0.3596	2.67182	2.16515	unchanged	P53602;H3BP35	Diphosphomevalonate decarboxylase	MVD
	774	ENSG00000142867	0.359233	2.79588	2.25772	unchanged	A0A087WWW9;O95999	B-cell lymphoma/leukemia 10	BCL10
	775	ENSG00000145781	0.359167	2.99773	2.40647	unchanged	Q9Y6G5;D6RJ90;D6RC04;H0Y9N4	COMM domain-containing protein 10	COMMD10
	776	ENSG00000135723	0.358967	3.5754	2.83011	unchanged	Q9Y613	FH1/FH2 domain-containing protein 1	FHOD1
	777	ENSG00000108773	0.3589	3.02032	2.42219	unchanged	Q92830;K7ERS6	Histone acetyltransferase KAT2A	KAT2A
	778	ENSG00000166133	0.3587	2.52003	2.04995	unchanged	Q8IZ73;Q8IZ73-2	RNA pseudouridylate synthase domain-containing protein 2	RPUSD2
	779	ENSG00000159202	0.3586	2.62657	2.13045	unchanged	Q9H832;Q9H832-2;I3L4C5	Ubiquitin-conjugating enzyme E2 Z	UBE2Z
	780	ENSG00000264522	0.358433	2.71802	2.19907	unchanged	Q6GQQ9;Q6GQQ9-2	OTU domain-containing protein 7B	OTUD7B
	781	ENSG00000151422	0.358367	2.84715	2.29536	unchanged	P16591;P16591-2	Tyrosine-protein kinase Fer	FER
	782	ENSG00000122126	0.3578	3.23897	2.5789	unchanged	Q01968;Q01968-2	Inositol polyphosphate 5-phosphatase OCRL-1	OCRL
	783	ENSG00000121671	0.357767	3.95402	3.11263	unchanged	Q49AN0;A0A0D2X7Z3;Q49AN0-2	Cryptochrome-2	CRY2
	784	ENSG00000185721	0.357733	2.37578	1.94174	unchanged	Q9Y295	Developmentally-regulated GTP-binding protein 1	DRG1
	785	ENSG00000112972	0.357333	3.72868	2.94367	unchanged	Q01581	Hydroxymethylglutaryl-CoA synthase, cytoplasmic	HMGCS1
	786	ENSG00000005194	0.356967	3.14913	2.51371	unchanged	Q6FI81;Q6FI81-3;H3BV90;H3BT65;H3BUG4	Anamorsin	CIAPIN1
	787	ENSG00000164024	0.3569	2.87205	2.31337	unchanged	P53582	Methionine aminopeptidase 1	METAP1
	788	ENSG00000124208	0.356867	2.97006	2.38512	unchanged	I3L0A0;Q13404-7;Q13404-2;Q13404-1	Ubiquitin-conjugating enzyme E2 variant 1	TMEM189-UBE2V1;UBE2V1
	789	ENSG00000247626	0.356033	3.26345	2.59519	unchanged	Q96GW9	Methionine--tRNA ligase, mitochondrial	MARS2
	790	ENSG00000118046	0.3555	3.46474	2.74766	unchanged	Q15831;Q15831-2;K7EP59;K7EQN8	Serine/threonine-protein kinase STK11	STK11
	791	ENSG00000117174	0.355333	4.1349	3.24548	unchanged	Q9NWK9;Q9NWK9-2	Box C/D snoRNA protein 1	ZNHIT6
	792	ENSG00000100097	0.354667	4.01728	3.15978	unchanged	P09382	Galectin-1	LGALS1
	793	ENSG00000140105	0.3543	3.64267	2.88174	unchanged	P23381;P23381-2	Tryptophan--tRNA ligase, cytoplasmic;T1-TrpRS;T2-TrpRS	WARS
	794	ENSG00000164038	0.354267	3.25419	2.58802	unchanged	Q86UD5;E9PE63;A0A0C4DGB3;B7Z676;Q86UD5-2	Mitochondrial sodium/hydrogen exchanger 9B2	SLC9B2
	795	ENSG00000164080	0.3542	4.18376	3.2802	unchanged	Q9Y4B4;H0Y760	Helicase ARIP4	RAD54L2
	796	ENSG00000132128	0.353933	3.65329	2.89073	unchanged	Q15345;A0A0B4J2G4;Q15345-3;A0A087WTU1;A0A087X0S7;A0A0C4DH00	Leucine-rich repeat-containing protein 41	LRRC41
	797	ENSG00000125954	0.353767	3.46788	2.74916	unchanged	B4DL54;P49356-2	Protein farnesyltransferase subunit beta	CHURC1-FNTB;FNTB
	798	ENSG00000137767	0.353633	4.23062	3.31099	unchanged	Q9Y6N5;H3BNP9	Sulfide:quinone oxidoreductase, mitochondrial	SQRDL
	799	ENSG00000153317	0.353633	4.28567	3.3559	unchanged	Q9ULH1;A0A0A0MRE5;Q9ULH1-2;H0YBF7	Arf-GAP with SH3 domain, ANK repeat and PH domain-containing protein 1	ASAP1
	800	ENSG00000163623	0.353167	4.16115	3.26245	unchanged	P78426;F8VWZ9	Homeobox protein Nkx-6.1	NKX6-1
	801	ENSG00000160584	0.353067	3.40798	2.70647	unchanged	Q9Y2K2;H0Y4E8;Q9Y2K2-7;Q9Y2K2-8;H7C3X8	Serine/threonine-protein kinase SIK3	SIK3
	802	ENSG00000115255	0.352933	2.61009	2.11731	unchanged	Q96HR9-2;Q96HR9	Receptor expression-enhancing protein 6	REEP6
	803	ENSG00000115977	0.3528	2.89107	2.32644	unchanged	A0A096LP25;Q6ZSR9;A0A096LNZ0	Uncharacterized protein FLJ45252	AAK1
	804	ENSG00000137364	0.352333	2.62318	2.12801	unchanged	P51580	Thiopurine S-methyltransferase	TPMT
	805	ENSG00000187735	0.352133	2.45598	2.00013	unchanged	P23193;A0A1W2PPZ5;P23193-2;A0A1W2PRL9	Transcription elongation factor A protein 1	TCEA1
	806	ENSG00000140386	0.351967	3.50272	2.77583	unchanged	Q9BY12;H3BPM0;H3BS25;Q9BY12-2;H3BQF3;H3BT27;Q9BY12-3	S phase cyclin A-associated protein in the endoplasmic reticulum	SCAPER
	807	ENSG00000241370	0.351367	2.96429	2.38081	unchanged	Q9H633;A0A0G2JJ26;A0A140T9R9;Q9H633-4;A0A0G2JIT5;A0A0G2JJ52;A0A140TA46;A0A096LP39;Q9H633-3;Q9H633-2	Ribonuclease P protein subunit p21	RPP21;TRIM39-RPP21
	808	ENSG00000117020	0.3513	1.86261	1.53678	unchanged	Q9Y243;Q9Y243-2;A0A5K1VW74;A0A5F9ZHU3;A0A5F9ZGY0	RAC-gamma serine/threonine-protein kinase	AKT3
	809	ENSG00000127824	0.351267	2.57775	2.09244	unchanged	P68366;P68366-2	Tubulin alpha-4A chain	TUBA4A
	810	ENSG00000075151	0.3511	3.24662	2.58384	unchanged	A0A0U1RQK7;O43432;A0A0A0MSA7;O43432-3;O43432-4	Eukaryotic translation initiation factor 4 gamma 3	EIF4G3
	811	ENSG00000162971	0.351067	2.87455	2.31555	unchanged	A2RUC4	tRNA wybutosine-synthesizing protein 5	TYW5
	812	ENSG00000119638	0.350367	4.27165	3.34467	unchanged	Q8TD19	Serine/threonine-protein kinase Nek9	NEK9
	813	ENSG00000097021	0.350233	2.74598	2.22105	unchanged	O00154-4;O00154;O00154-6;O00154-7;O00154-5;O00154-2;K7EKP8;O00154-3	Cytosolic acyl coenzyme A thioester hydrolase	ACOT7
	814	ENSG00000142546	0.349933	3.95926	3.11714	unchanged	Q9Y314;A0A075B6F9;M0R3B2	Nitric oxide synthase-interacting protein	NOSIP
	815	ENSG00000170836	0.3499	3.94671	3.10732	unchanged	O15297;O15297-2	Protein phosphatase 1D	PPM1D
	816	ENSG00000121060	0.349767	3.71598	2.93477	unchanged	Q14258;A0A3B3IUA7	E3 ubiquitin/ISG15 ligase TRIM25	TRIM25
	817	ENSG00000071564	0.3496	3.94922	3.10944	unchanged	P15923;P15923-2;A0A0A0MRB7;X6REB3;P15923-3	Transcription factor E2-alpha	TCF3
	818	ENSG00000100220	0.349533	3.82278	3.01164	unchanged	Q9Y3I0	tRNA-splicing ligase RtcB homolog	RTCB
	819	ENSG00000149761	0.349433	2.12559	1.74355	unchanged	Q9BRQ3;Q9BRQ3-3;H0YGG2;F5H1N0;G3V1M6;J3KQJ3;Q9BRQ3-2	Nucleoside diphosphate-linked moiety X motif 22	NUDT22
	820	ENSG00000124299	0.349367	3.09039	2.47308	unchanged	P12955;P12955-3;K7ES25;A0A494C165;P12955-2;A0A494C194	Xaa-Pro dipeptidase	PEPD
	821	ENSG00000172315	0.3488	3.21201	2.55947	unchanged	Q96S44	TP53-regulating kinase	TP53RK
	822	ENSG00000157500	0.348033	3.76748	2.97174	unchanged	Q9UKG1	DCC-interacting protein 13-alpha	APPL1
	823	ENSG00000254986	0.347833	2.87636	2.31605	unchanged	Q9NY33;Q9NY33-4;G3V1D3;G3V180	Dipeptidyl peptidase 3	DPP3
	824	ENSG00000117450	0.3476	2.15323	1.76444	unchanged	Q06830;A0A0A0MSI0	Peroxiredoxin-1	PRDX1
	825	ENSG00000188130	0.3469	3.21546	2.56114	unchanged	P53778;B5MDL5;P53778-2	Mitogen-activated protein kinase 12	MAPK12
	826	ENSG00000151065	0.346667	3.78737	2.98505	unchanged	Q8IZD4;F5GZK9;Q8IZD4-2	mRNA-decapping enzyme 1B	DCP1B
	827	ENSG00000184752	0.346333	3.3056	2.62726	unchanged	Q9UI09	NADH dehydrogenase [ubiquinone] 1 alpha subcomplex subunit 12	NDUFA12
	828	ENSG00000123213	0.3463	4.00393	3.15044	unchanged	Q9BYT8;E9PCB6	Neurolysin, mitochondrial	NLN
	829	ENSG00000074201	0.345833	3.13975	2.50742	unchanged	P54105;E9PMI6;J3KN38;E9PJF4	Methylosome subunit pICln	CLNS1A
	830	ENSG00000137343	0.3457	2.37448	1.94074	unchanged	Q5SQI0;Q5SQI0-7;Q5SQI0-6;Q5SQI0-5;Q5SQI0-4;Q5SQI0-3;Q5SQI0-2	Alpha-tubulin N-acetyltransferase 1	ATAT1
	831	ENSG00000124120	0.345667	1.8129	1.49814	unchanged	Q9BTX7	Alpha-tocopherol transfer protein-like	TTPAL
	832	ENSG00000175550	0.345267	2.85603	2.30162	unchanged	Q14919;Q14919-2;C9JCC6;E9PQX9;E9PNC7;E9PMW2	Dr1-associated corepressor	DRAP1
	833	ENSG00000142657	0.3449	2.49093	2.02581	unchanged	P52209;P52209-2;K7EM49	6-phosphogluconate dehydrogenase, decarboxylating	PGD
	834	ENSG00000157881	0.3448	2.82976	2.28315	unchanged	Q9NVE7;A0A494C169;E9PHT6;H0YA26	Pantothenate kinase 4	PANK4
	835	ENSG00000111247	0.3446	3.70066	2.9242	unchanged	Q96B01;Q96B01-2;Q96B01-3;F5H1Y0;H0YGT5	RAD51-associated protein 1	RAD51AP1
	836	ENSG00000241127	0.344567	2.92579	2.35281	unchanged	Q9NRH1;C9IZ57;Q9NRH1-2	Yae1 domain-containing protein 1	YAE1D1
	837	ENSG00000002834	0.344333	3.87473	3.05026	unchanged	Q14847;Q14847-2;C9J9W2;Q14847-3	LIM and SH3 domain protein 1	LASP1
	838	ENSG00000091651	0.3442	2.83925	2.28966	unchanged	Q9Y5N6;H3BT22;H3BTQ7	Origin recognition complex subunit 6	ORC6
	839	ENSG00000161542	0.3439	3.40303	2.70334	unchanged	Q14558-2;Q14558	Phosphoribosyl pyrophosphate synthase-associated protein 1	PRPSAP1
	840	ENSG00000110958	0.3438	3.25485	2.58843	unchanged	Q15185;A0A087WYT3;Q15185-4;B4DDC6;Q15185-3;Q15185-2	Prostaglandin E synthase 3	PTGES3
	841	ENSG00000124226	0.3434	3.11749	2.49285	unchanged	Q9Y508;A0A096LNV3;A0A096LP02;Q9Y508-2	E3 ubiquitin-protein ligase RNF114	RNF114
	842	ENSG00000117419	0.3433	3.19678	2.54977	unchanged	O43414;H0Y4B0;A0A3B3ISV9;O43414-3;O43414-2;F6QUN3;F6UGJ8	ERI1 exoribonuclease 3	ERI3
	843	ENSG00000167515	0.343267	2.31602	1.89495	unchanged	Q9UL33;A0A0B4J294;H3BP13;Q9UL33-2;H3BUK6	Trafficking protein particle complex subunit 2-like protein	TRAPPC2L
	844	ENSG00000204220	0.342933	2.79042	2.25449	unchanged	O15212;A2AB88	Prefoldin subunit 6	PFDN6
	845	ENSG00000139697	0.342933	3.29837	2.62083	unchanged	A3KN83;A3KN83-2;A3KN83-3;A3KN83-4	Protein strawberry notch homolog 1	SBNO1
	846	ENSG00000183049	0.342867	2.4274	1.98	unchanged	Q8IU85;Q8IU85-2;A0A087WUR6	Calcium/calmodulin-dependent protein kinase type 1D	CAMK1D
	847	ENSG00000198752	0.3422	4.16052	3.26225	unchanged	Q9Y5S2;H0YLY0	Serine/threonine-protein kinase MRCK beta	CDC42BPB
	848	ENSG00000177879	0.3419	3.08775	2.47091	unchanged	Q92572	AP-3 complex subunit sigma-1	AP3S1
	849	ENSG00000100441	0.341767	3.14432	2.50997	unchanged	O15037	Protein KHNYN	KHNYN
	850	ENSG00000068400	0.341567	3.60335	2.85325	unchanged	Q4V328;Q4V328-4;Q4V328-2	GRIP1-associated protein 1	GRIPAP1
	851	ENSG00000088832	0.341533	3.66651	2.89937	unchanged	P62942;Q1JUQ3;Q1JUQ5;A0A087WTS4;Q5W0X3;A0A087WV48;A0A087WZM5	Peptidyl-prolyl cis-trans isomerase FKBP1A;Peptidyl-prolyl cis-trans isomerase	FKBP1A;FKBP12-Exin;FKBP12-Exip2
	852	ENSG00000179151	0.341233	3.78306	2.98272	unchanged	Q96F86	Enhancer of mRNA-decapping protein 3	EDC3
	853	ENSG00000114331	0.340767	2.94624	2.36818	unchanged	Q15057;A0A087X1H5;A0A0U1RQT1	Arf-GAP with coiled-coil, ANK repeat and PH domain-containing protein 2	ACAP2
	854	ENSG00000102390	0.339833	3.11589	2.49202	unchanged	Q9BVG4;A6NDF3	Protein PBDC1	PBDC1
	855	ENSG00000140395	0.339167	2.21897	1.81721	unchanged	Q9GZS3;H0YN81;H0YMF9;H0YL19	WD repeat-containing protein 61;WD repeat-containing protein 61, N-terminally processed	WDR61
	856	ENSG00000164305	0.3391	2.29821	1.88086	unchanged	P42574	Caspase-3;Caspase-3 subunit p17;Caspase-3 subunit p12	CASP3
	857	ENSG00000157110	0.338833	3.11425	2.49195	unchanged	Q93062-3;B4E3T4;Q93062-2	RNA-binding protein with multiple splicing	RBPMS
	858	ENSG00000148516	0.338333	3.5788	2.83301	unchanged	P37275;P37275-3;P37275-4;P37275-5;P37275-2	Zinc finger E-box-binding homeobox 1	ZEB1
	859	ENSG00000184007	0.338267	2.40032	1.95871	unchanged	Q12974;Q12974-3;Q12974-4	Protein tyrosine phosphatase type IVA 2	PTP4A2
	860	ENSG00000163412	0.338233	3.2124	2.55961	unchanged	Q8N5X7;C9JUY2;C9J6E5;A0A3B3ITM5;C9J7Z6;Q8N5X7-2	Eukaryotic translation initiation factor 4E type 3	EIF4E3
	861	ENSG00000185122	0.337767	2.88847	2.32461	unchanged	Q00613;Q00613-2;E9PMQ6	Heat shock factor protein 1	HSF1
	862	ENSG00000134602	0.337533	3.12279	2.49648	unchanged	Q8NBY1;Q9P289;B4E0Y9;Q9P289-2;Q9P289-3	Serine/threonine-protein kinase 26	STK26
	863	ENSG00000101132	0.337233	2.22466	1.8219	unchanged	Q9NQP4;E9PQY2	Prefoldin subunit 4	PFDN4
	864	ENSG00000063854	0.3368	3.25528	2.58859	unchanged	Q16775;Q16775-2;H3BPK3;H3BPQ4;H3BQW8	Hydroxyacylglutathione hydrolase, mitochondrial	HAGH
	865	ENSG00000148175	0.3368	4.11748	3.23154	unchanged	P27105;P27105-2	Erythrocyte band 7 integral membrane protein	STOM
	866	ENSG00000105514	0.336567	3.97822	3.13158	unchanged	O95716	Ras-related protein Rab-3D	RAB3D
	867	ENSG00000151247	0.336033	3.9528	3.11263	unchanged	P06730;P06730-2;D6RBW1;D6RFJ3;P06730-3	Eukaryotic translation initiation factor 4E	EIF4E
	868	ENSG00000197548	0.335867	3.34517	2.65952	unchanged	O95352;O95352-2;O95352-3	Ubiquitin-like modifier-activating enzyme ATG7	ATG7
	869	ENSG00000154114	0.335767	2.58989	2.10072	unchanged	Q5QJ74	Tubulin-specific chaperone cofactor E-like protein	TBCEL
	870	ENSG00000120915	0.335633	3.01172	2.41666	unchanged	P34913;E5RFH6;E5RFU2;P34913-3;P34913-2;H0YAW7	Bifunctional epoxide hydrolase 2;Cytosolic epoxide hydrolase 2;Lipid-phosphate phosphatase	EPHX2
	871	ENSG00000129596	0.335467	1.7021	1.40817	unchanged	Q16878	Cysteine dioxygenase type 1	CDO1
	872	ENSG00000004700	0.335233	3.50865	2.78056	unchanged	P46063	ATP-dependent DNA helicase Q1	RECQL
	873	ENSG00000118257	0.335067	2.82828	2.28207	unchanged	O60462;O60462-2;O60462-3;O60462-5;O60462-4;O60462-6	Neuropilin-2	NRP2
	874	ENSG00000179364	0.335	3.51207	2.78338	unchanged	Q86VP3;F8VW41;Q86VP3-4;Q86VP3-3;Q86VP3-2	Phosphofurin acidic cluster sorting protein 2	PACS2
	875	ENSG00000149100	0.334333	3.90896	3.07728	unchanged	Q7L2H7;Q7L2H7-2;J3KNJ2	Eukaryotic translation initiation factor 3 subunit M	EIF3M
	876	ENSG00000121749	0.333967	2.97912	2.39157	unchanged	Q8TC07-2;Q8TC07-3;Q8TC07;C9JA93	TBC1 domain family member 15	TBC1D15
	877	ENSG00000106009	0.333867	3.15003	2.51371	unchanged	Q6PJG6	BRCA1-associated ATM activator 1	BRAT1
	878	ENSG00000074800	0.333833	2.39834	1.95767	unchanged	P06733;A0A2R8Y6G6;P06733-2;K7EM90	Alpha-enolase;Enolase	ENO1
	879	ENSG00000072832	0.333767	3.4471	2.73527	unchanged	Q14194;Q14194-2;E9PD68	Dihydropyrimidinase-related protein 1	CRMP1
	880	ENSG00000132612	0.333633	3.80203	2.99616	unchanged	Q9UN37;I3L4J1	Vacuolar protein sorting-associated protein 4A	VPS4A
	881	ENSG00000075945	0.3336	2.08578	1.7138	unchanged	Q92845;Q92845-2;Q92845-3;Q92845-4	Kinesin-associated protein 3	KIFAP3
	882	ENSG00000068438	0.3336	2.91918	2.34768	unchanged	Q9UET6;B7Z4K4	Putative tRNA (cytidine(32)/guanosine(34)-2-O)-methyltransferase	FTSJ1
	883	ENSG00000147162	0.333367	3.82288	3.01164	unchanged	O15294;O15294-3;O15294-2;O15294-4	UDP-N-acetylglucosamine--peptide N-acetylglucosaminyltransferase 110 kDa subunit	OGT
	884	ENSG00000095066	0.333267	3.66201	2.89816	unchanged	Q96ED9;Q96ED9-2;K7EJ48;K7ENU5	Protein Hook homolog 2	HOOK2
	885	ENSG00000183155	0.333033	3.11423	2.49195	unchanged	P47224	Guanine nucleotide exchange factor MSS4	RABIF
	886	ENSG00000104731	0.332967	4.16052	3.26225	unchanged	Q8TBB5;Q8TBB5-3;Q8TBB5-2;H3BQH3	Kelch domain-containing protein 4	KLHDC4
	887	ENSG00000049130	0.3329	2.25661	1.84711	unchanged	P21583;P21583-3;P21583-2	Kit ligand;Soluble KIT ligand	KITLG
	888	ENSG00000130724	0.332433	2.76348	2.23417	unchanged	O43633;M0R1T5;M0R1L7	Charged multivesicular body protein 2a	CHMP2A
	889	ENSG00000112787	0.332433	2.85434	2.30053	unchanged	Q9HCM7;A0A3B3IRR3	Fibrosin-1-like protein	FBRSL1
	890	ENSG00000108262	0.331633	4.02411	3.1646	unchanged	Q9Y2X7;Q9Y2X7-3;J3QRU8;A0A0C4DGN6	ARF GTPase-activating protein GIT1	GIT1
	891	ENSG00000151465	0.331467	2.90841	2.33879	unchanged	O75794;X6RA30;X6RKY7;X6RF82	Cell division cycle protein 123 homolog	CDC123
	892	ENSG00000031823	0.331433	2.58399	2.09609	unchanged	Q9H6Z4;Q9H6Z4-3	Ran-binding protein 3	RANBP3
	893	ENSG00000002549	0.3313	4.15304	3.25838	unchanged	P28838;P28838-2	Cytosol aminopeptidase	LAP3
	894	ENSG00000140406	0.331033	2.01983	1.66105	unchanged	Q9H1K6	Mesoderm development candidate 1	MESDC1
	895	ENSG00000126756	0.330767	2.95262	2.37242	unchanged	Q9UBK9;Q9UBK9-2	Protein UXT	UXT
	896	ENSG00000123992	0.3307	2.33069	1.90588	unchanged	Q9ULA0;E5RIA4;E7ETB3;E7EMB6;B9ZVU2;F8WAN0	Aspartyl aminopeptidase	DNPEP
	897	ENSG00000154370	0.330667	2.487	2.0229	unchanged	Q96F44;Q96F44-2;Q96F44-3	E3 ubiquitin-protein ligase TRIM11	TRIM11
	898	ENSG00000119661	0.330433	2.96771	2.38344	unchanged	Q4LDG9;G3V424;Q4LDG9-3;G3V5I4;H0YM28;G3V2M0;Q4LDG9-2	Dynein light chain 1, axonemal	DNAL1
	899	ENSG00000179222	0.329767	3.72994	2.94367	unchanged	Q9Y5V3;Q9Y5V3-2	Melanoma-associated antigen D1	MAGED1
	900	ENSG00000113966	0.3297	2.55861	2.07861	unchanged	Q9H0F7;A0A0J9YXT0;Q9H0F7-2;C9IZ13	ADP-ribosylation factor-like protein 6	ARL6
	901	ENSG00000167468	0.329167	3.12227	2.49648	unchanged	P36969;K7ERP4;A0A087X2I2;A0A087WT12;P36969-2;K7EKX7;K7ENB4;K7EJ20;R4GNE4;A0A0A0MTT1	Phospholipid hydroperoxide glutathione peroxidase, mitochondrial;Glutathione peroxidase	GPX4
	902	ENSG00000134440	0.329133	3.56041	2.81887	unchanged	O43776	Asparagine--tRNA ligase, cytoplasmic	NARS
	903	ENSG00000102024	0.329033	3.17071	2.52867	unchanged	P13797;A0A0A0MSQ0;P13797-2;P13797-3	Plastin-3	PLS3
	904	ENSG00000121350	0.328933	1.30742	1.08688	unchanged	Q8WU10;Q8WU10-2	Pyridine nucleotide-disulfide oxidoreductase domain-containing protein 1	PYROXD1
	905	ENSG00000127191	0.3287	3.14417	2.50997	unchanged	Q12933;Q12933-3;Q12933-2;Q12933-4;B1AMX8	TNF receptor-associated factor 2	TRAF2
	906	ENSG00000099341	0.328567	3.231	2.57318	unchanged	R4GMR5;P48556;K7EJR3	26S proteasome non-ATPase regulatory subunit 8	PSMD8
	907	ENSG00000011485	0.328333	2.65125	2.14873	unchanged	P53041;H0YDU8;A8MU39	Serine/threonine-protein phosphatase 5;Serine/threonine-protein phosphatase	PPP5C
	908	ENSG00000171914	0.327767	3.87057	3.04747	unchanged	Q9Y4G6;A0A1B0GVU7;H0YMT1	Talin-2	TLN2
	909	ENSG00000169221	0.327733	3.67019	2.90272	unchanged	Q4KMP7	TBC1 domain family member 10B	TBC1D10B
	910	ENSG00000122729	0.327567	3.61111	2.85786	unchanged	P21399	Cytoplasmic aconitate hydratase	ACO1
	911	ENSG00000205758	0.3274	2.11313	1.73418	unchanged	O95825;A6NND8;A6NHJ8;A6NMA8;H7C3I5;O95825-2;C9K0F7;C9JAL0	Quinone oxidoreductase-like protein 1	CRYZL1
	912	ENSG00000117448	0.3273	2.62679	2.13047	unchanged	P14550;Q5T621	Alcohol dehydrogenase [NADP(+)]	AKR1A1
	913	ENSG00000141985	0.327133	2.35768	1.92775	unchanged	Q99961;Q99961-3;Q99961-2;M0QYE0;M0R0I3	Endophilin-A2	SH3GL1
	914	ENSG00000138674	0.326867	3.54644	2.8087	unchanged	O94979;D6REX3;O94979-8;O94979-2;O94979-3;O94979-9;O94979-4;O94979-10;O94979-6;D6RHZ5;H7BXG7;O94979-7	Protein transport protein Sec31A	SEC31A
	915	ENSG00000104517	0.326867	3.56508	2.8226	unchanged	O95071;E7EMW7;O95071-2	E3 ubiquitin-protein ligase UBR5	UBR5
	916	ENSG00000134444	0.3264	2.97673	2.38984	unchanged	A0A2R8Y566;Q9P260-2;Q9P260;A0A075B785	LisH domain and HEAT repeat-containing protein KIAA1468	KIAA1468
	917	ENSG00000174371	0.3264	4.11182	3.22784	unchanged	Q9UQ84;Q9UQ84-4	Exonuclease 1	EXO1
	918	ENSG00000177000	0.326233	3.25725	2.58978	unchanged	P42898;A0A286YFD0;Q5SNW7;P42898-2;L7P8G6;A0A286YF17	Methylenetetrahydrofolate reductase	MTHFR
	919	ENSG00000122299	0.3262	4.18575	3.28139	unchanged	Q8IWR0;I3L2K5	Zinc finger CCCH domain-containing protein 7A	ZC3H7A
	920	ENSG00000160948	0.325667	3.61423	2.85975	unchanged	Q9UK41;Q9UK41-2;E9PQR7;E9PM90	Vacuolar protein sorting-associated protein 28 homolog	VPS28
	921	ENSG00000165671	0.325633	3.33975	2.65491	unchanged	Q96L73;Q96L73-2;Q96L73-3	Histone-lysine N-methyltransferase, H3 lysine-36 and H4 lysine-20 specific	NSD1
	922	ENSG00000085788	0.325633	3.40995	2.70816	unchanged	O94830	Phospholipase DDHD2	DDHD2
	923	ENSG00000176853	0.3256	3.48233	2.75978	unchanged	Q658Y4;E7ER68	Protein FAM91A1	FAM91A1
	924	ENSG00000110711	0.325333	3.46612	2.74845	unchanged	O00170;E9PMH2	AH receptor-interacting protein	AIP
	925	ENSG00000081154	0.324933	2.89399	2.32853	unchanged	Q8WW12;Q8WW12-2	PEST proteolytic signal-containing nuclear protein	PCNP
	926	ENSG00000167302	0.3244	1.93388	1.59201	unchanged	Q96N21;Q96N21-2;A0A1B0GV70	AP-4 complex accessory subunit tepsin	ENTHD2
	927	ENSG00000165916	0.324233	3.1073	2.48694	unchanged	P17980;E9PM69;E9PKD5;E9PMD8	26S protease regulatory subunit 6A	PSMC3
	928	ENSG00000119812	0.3241	3.271	2.60064	unchanged	Q8NCA5;E9PH82	Protein FAM98A	FAM98A
	929	ENSG00000108443	0.3236	2.39789	1.95737	unchanged	P23443;P23443-2;P23443-3;P23443-5;P23443-4	Ribosomal protein S6 kinase beta-1	RPS6KB1
	930	ENSG00000119335	0.3236	2.52835	2.05525	unchanged	Q01105;A0A0C4DFV9;Q01105-3;Q01105-4;P0DME0;A0A087X027	Protein SET;Protein SETSIP	SET;SETSIP
	931	ENSG00000078140	0.3234	3.50355	2.77636	unchanged	P61086;P61086-2;P61086-3;D6RDM7	Ubiquitin-conjugating enzyme E2 K	UBE2K
	932	ENSG00000140374	0.3233	3.13572	2.50442	unchanged	P13804;P13804-2;H0YLU7;H0YK49;H0YL12;H0YNX6;H0YKF0	Electron transfer flavoprotein subunit alpha, mitochondrial	ETFA
	933	ENSG00000136930	0.323	3.2134	2.55961	unchanged	Q99436;Q5TBG5;Q99436-2	Proteasome subunit beta type-7;Proteasome subunit beta type	PSMB7
	934	ENSG00000089022	0.322867	2.52129	2.05054	unchanged	Q8IW41;Q8IW41-2;F8VRP2;R4GN33	MAP kinase-activated protein kinase 5	MAPKAPK5
	935	ENSG00000167900	0.322833	3.45691	2.74216	unchanged	P04183;K7ERV3;K7ES52;K7ERJ1	Thymidine kinase, cytosolic;Thymidine kinase	TK1
	936	ENSG00000128708	0.322733	3.08387	2.46825	unchanged	O14929;O14929-2	Histone acetyltransferase type B catalytic subunit	HAT1
	937	ENSG00000111203	0.3227	3.02034	2.42219	unchanged	Q969R8;H0YFM4	Integrin-alpha FG-GAP repeat-containing protein 2	ITFG2
	938	ENSG00000084623	0.322333	3.04432	2.43921	unchanged	Q13347	Eukaryotic translation initiation factor 3 subunit I	EIF3I
	939	ENSG00000140691	0.322067	2.39917	1.95813	unchanged	Q96C12;H3BS74;J3KQ26;Q96C12-2	Armadillo repeat-containing protein 5	ARMC5
	940	ENSG00000140598	0.3218	3.43076	2.7244	unchanged	Q7Z2Z2;Q7Z2Z2-2	Elongation factor Tu GTP-binding domain-containing protein 1	EFTUD1
	941	ENSG00000119333	0.3213	2.30853	1.88893	unchanged	Q96EX3	WD repeat-containing protein 34	WDR34
	942	ENSG00000181826	0.320667	2.39912	1.95813	unchanged	Q8IUW5;D6RBN9	RELT-like protein 1	RELL1
	943	ENSG00000171940	0.320533	3.95939	3.11714	unchanged	O75362	Zinc finger protein 217	ZNF217
	944	ENSG00000143373	0.320467	3.50712	2.77933	unchanged	Q8N1G0;Q8N1G0-2;F8WCX2	Zinc finger protein 687	ZNF687
	945	ENSG00000164924	0.3204	3.20335	2.55434	unchanged	P63104;B0AZS6;E7EX29;P63104-2;B7Z2E6;H0YB80	14-3-3 protein zeta/delta	YWHAZ
	946	ENSG00000117143	0.3201	3.73494	2.94619	unchanged	Q16222;Q16222-2;Q16222-3	UDP-N-acetylhexosamine pyrophosphorylase;UDP-N-acetylgalactosamine pyrophosphorylase;UDP-N-acetylglucosamine pyrophosphorylase	UAP1
	947	ENSG00000095380	0.3198	2.88737	2.32398	unchanged	Q9NR45	Sialic acid synthase	NANS
	948	ENSG00000115539	0.319367	2.2347	1.83009	unchanged	Q9H2J4	Phosducin-like protein 3	PDCL3
	949	ENSG00000164163	0.3193	2.69469	2.1811	unchanged	P61221;D6R9I9	ATP-binding cassette sub-family E member 1	ABCE1
	950	ENSG00000233927	0.319267	2.59993	2.10908	unchanged	P62857	40S ribosomal protein S28	RPS28
	951	ENSG00000126215	0.318933	2.58084	2.09467	unchanged	O43542;G3V3H9;G3V3Q2;G3V399	DNA repair protein XRCC3	XRCC3
	952	ENSG00000176953	0.318667	3.13846	2.50644	unchanged	Q8NCF5	NFATC2-interacting protein	NFATC2IP
	953	ENSG00000173821	0.318267	2.86795	2.3107	unchanged	Q63HN8;A0A0A0MTR7;A0A0A0MTC1;Q63HN8-4	E3 ubiquitin-protein ligase RNF213	RNF213
	954	ENSG00000149925	0.317967	2.43523	1.98545	unchanged	P04075;H3BQN4;J3KPS3;P04075-2;CON__sp|P00883|ALDOA_RABIT;H3BUH7;H3BR04;H3BPS8;H3BMQ8	Fructose-bisphosphate aldolase A;Fructose-bisphosphate aldolase	ALDOA
	955	ENSG00000132471	0.317933	3.61275	2.85862	unchanged	Q969T9;A6NG10;K7EMC9;Q969T9-2;K7EIJ0;K7ENL2;K7EIN1;K7ESN4	WW domain-binding protein 2	WBP2
	956	ENSG00000125753	0.317867	3.16411	2.52307	unchanged	P50552	Vasodilator-stimulated phosphoprotein	VASP
	957	ENSG00000164039	0.316967	3.07286	2.46042	unchanged	Q9BUT1;D6R9P2;Q9BUT1-3	3-hydroxybutyrate dehydrogenase type 2	BDH2;SLC9B2
	958	ENSG00000105254	0.316433	3.47234	2.75303	unchanged	Q99426;A0A494C0X0;Q99426-2;K7EP07;K7EK42	Tubulin-folding cofactor B	TBCB
	959	ENSG00000122512	0.3159	2.93399	2.35827	unchanged	P54278;A0A2R8Y6S3;C9J167;P54278-3;P54278-2	Mismatch repair endonuclease PMS2	PMS2
	960	ENSG00000111676	0.315767	2.63947	2.13928	unchanged	P54259	Atrophin-1	ATN1
	961	ENSG00000125249	0.315667	1.43515	1.19145	unchanged	P10114;F6U784	Ras-related protein Rap-2a	RAP2A
	962	ENSG00000184033	0.3156	2.73536	2.21323	unchanged	P78358	Cancer/testis antigen 1	CTAG1A
	963	ENSG00000114316	0.3154	2.34106	1.91385	unchanged	Q13107;Q13107-2;H7C189	Ubiquitin carboxyl-terminal hydrolase 4;Ubiquitin carboxyl-terminal hydrolase	USP4
	964	ENSG00000206053	0.315333	2.80321	2.2631	unchanged	Q9H910-2;H3BU16;H3BMT0	Hematological and neurological expressed 1-like protein	HN1L
	965	ENSG00000169612	0.315267	3.78566	2.98497	unchanged	Q9BTL3;A0A3B3IU46	RNMT-activating mini protein	FAM103A1
	966	ENSG00000228716	0.314833	3.85699	3.03589	unchanged	P00374;B4DM58;P00374-2	Dihydrofolate reductase	DHFR
	967	ENSG00000185515	0.314733	3.73856	2.94815	unchanged	P46736;P46736-2;P46736-3;P46736-5;H9KVA9;X6RJS7;A0A087WZR3;A0A0D9SF50;P46736-4	Lys-63-specific deubiquitinase BRCC36	BRCC3
	968	ENSG00000137947	0.3147	3.5804	2.83385	unchanged	Q00403;B1APE1;B1APE2	Transcription initiation factor IIB	GTF2B
	969	ENSG00000155975	0.3146	2.485	2.02201	unchanged	Q8NEZ2;Q8NEZ2-2;H0YBN0	Vacuolar protein sorting-associated protein 37A	VPS37A
	970	ENSG00000118162	0.314567	2.7729	2.24187	unchanged	Q9Y664;M0QXX4;M0QZ83	Kaptin	KPTN
	971	ENSG00000124688	0.314433	3.27956	2.60651	unchanged	Q15013;Q15013-3	MAD2L1-binding protein	MAD2L1BP
	972	ENSG00000114942	0.3144	3.83601	3.02121	unchanged	P24534	Elongation factor 1-beta	EEF1B2
	973	ENSG00000014138	0.3143	3.85659	3.03586	unchanged	Q14181;A0A3B3ITS5	DNA polymerase alpha subunit B	POLA2
	974	ENSG00000178718	0.3137	3.12237	2.49648	unchanged	Q9BUL9	Ribonuclease P protein subunit p25	RPP25
	975	ENSG00000100354	0.313467	3.48684	2.76297	unchanged	Q9UPQ9;Q9UPQ9-1;H0Y720	Trinucleotide repeat-containing gene 6B protein	TNRC6B
	976	ENSG00000175416	0.313333	2.95805	2.37631	unchanged	P09497;P09497-2;D6RJD1	Clathrin light chain B	CLTB
	977	ENSG00000092330	0.3132	3.56633	2.82323	unchanged	Q9BSI4;B4DFJ1;Q9BSI4-2;H0YKA6;H0YLC9	TERF1-interacting nuclear factor 2	TINF2
	978	ENSG00000071051	0.3131	3.74355	2.95271	unchanged	O43639	Cytoplasmic protein NCK2	NCK2
	979	ENSG00000126934	0.3125	2.43591	1.98565	unchanged	P36507;G5E9C7	Dual specificity mitogen-activated protein kinase kinase 2	MAP2K2
	980	ENSG00000170779	0.3124	2.32169	1.89897	unchanged	Q9BXL8	Cell division cycle-associated protein 4	CDCA4
	981	ENSG00000101350	0.3124	3.02907	2.42802	unchanged	O15066	Kinesin-like protein KIF3B;Kinesin-like protein KIF3B, N-terminally processed	KIF3B
	982	ENSG00000139970	0.312033	3.76534	2.9703	unchanged	Q16799;Q2NKQ5	Reticulon-1;Reticulon	RTN1
	983	ENSG00000013275	0.311867	2.8451	2.29429	unchanged	P43686;P43686-2	26S protease regulatory subunit 6B	PSMC4
	984	ENSG00000154743	0.311833	3.21122	2.55919	unchanged	Q8NCE0;C9J7Z4;Q8NCE0-4;Q8NCE0-2;Q8NCE0-5;Q8NCE0-3	tRNA-splicing endonuclease subunit Sen2	TSEN2
	985	ENSG00000167994	0.3118	2.42971	1.98183	unchanged	Q8TBN0;E9PK89	Guanine nucleotide exchange factor for Rab-3A	RAB3IL1
	986	ENSG00000151461	0.311267	3.70974	2.9299	unchanged	Q9HAU5	Regulator of nonsense transcripts 2	UPF2
	987	ENSG00000064199	0.311033	1.96602	1.61797	unchanged	Q15506	Sperm surface protein Sp17	SPA17
	988	ENSG00000211460	0.310733	2.66932	2.16302	unchanged	Q15631;E9PGT1;H7C1D4	Translin	TSN
	989	ENSG00000144848	0.3107	2.39233	1.95337	unchanged	Q9NT62;Q9NT62-2	Ubiquitin-like-conjugating enzyme ATG3	ATG3
	990	ENSG00000154001	0.3104	3.2564	2.58944	unchanged	Q16537;Q16537-2;Q16537-3	Serine/threonine-protein phosphatase 2A 56 kDa regulatory subunit epsilon isoform	PPP2R5E
	991	ENSG00000162627	0.310367	2.72154	2.20203	unchanged	Q9UNH6;Q9UNH6-2;Q9UNH6-3;B7ZC83;E9PNL2	Sorting nexin-7	SNX7
	992	ENSG00000115350	0.310333	2.86303	2.30734	unchanged	Q9NR33	DNA polymerase epsilon subunit 4	POLE4
	993	ENSG00000066739	0.310267	2.15457	1.76527	unchanged	Q96BY7	Autophagy-related protein 2 homolog B	ATG2B
	994	ENSG00000043093	0.309767	3.25078	2.58592	unchanged	Q96GG9;C9J8R4;C9JVE2;C9JRU6;C9J0B2	DCN1-like protein 1;DCN1-like protein	DCUN1D1
	995	ENSG00000116962	0.3097	3.21503	2.56097	unchanged	P14543;P14543-2	Nidogen-1	NID1
	996	ENSG00000066777	0.309667	2.65819	2.15495	unchanged	Q9Y6D6;E5RIF2	Brefeldin A-inhibited guanine nucleotide-exchange protein 1	ARFGEF1
	997	ENSG00000131871	0.309533	2.34511	1.9173	unchanged	Q9BQE4;A0A182DWI4;E9PN30	Selenoprotein S	VIMP
	998	ENSG00000173548	0.309433	2.21324	1.81247	unchanged	Q8WV41	Sorting nexin-33	SNX33
	999	ENSG00000166986	0.309433	3.08393	2.46825	unchanged	P56192;P56192-2	Methionine--tRNA ligase, cytoplasmic	MARS
	1000	ENSG00000185238	0.3093	2.98375	2.39516	unchanged	O60678;O60678-2	Protein arginine N-methyltransferase 3	PRMT3
	1001	ENSG00000145725	0.308733	3.32342	2.64103	unchanged	O43314;A0A087WZV0;O43314-2	Inositol hexakisphosphate and diphosphoinositol-pentakisphosphate kinase 2	PPIP5K2
	1002	ENSG00000141279	0.3087	2.96373	2.38052	unchanged	P55786;E9PLK3;P55786-2	Puromycin-sensitive aminopeptidase	NPEPPS
	1003	ENSG00000106211	0.308567	3.07608	2.46341	unchanged	P04792	Heat shock protein beta-1	HSPB1
	1004	ENSG00000115211	0.308567	3.63507	2.87641	unchanged	Q9UI10-2	NA	NA
	1005	ENSG00000085721	0.3084	2.33892	1.91229	unchanged	Q9NYV6;H3BMT1;F5H148;Q9NYV6-3;Q9NYV6-2;Q9NYV6-4	RNA polymerase I-specific transcription initiation factor RRN3	RRN3
	1006	ENSG00000243989	0.3081	3.49954	2.77295	unchanged	Q03154;A0A1B0GU86;C9JMV9;A0A1B0GW23;Q03154-4;Q03154-2;Q03154-3;A0A1B0GV31	Aminoacylase-1	ACY1;ABHD14A-ACY1
	1007	ENSG00000130313	0.307933	3.52062	2.78891	unchanged	O95336;M0R261;M0R1L2	6-phosphogluconolactonase	PGLS
	1008	ENSG00000110047	0.307467	2.87998	2.31926	unchanged	Q9H4M9;A0A024R571;C9JC03;C9J2Z4	EH domain-containing protein 1	EHD1
	1009	ENSG00000145335	0.307333	2.37753	1.94285	unchanged	P37840;E7EPV7;P37840-2;D6RA31;H6UYS7;P37840-3	Alpha-synuclein	SNCA
	1010	ENSG00000166803	0.307067	2.68814	2.17693	unchanged	Q15004;H0YKX3;H0YMA4;A0A0U1RQM0	PCNA-associated factor	KIAA0101
	1011	ENSG00000171848	0.306467	2.36643	1.93469	unchanged	P31350;P31350-2;A0A286YFD6;C9JXC1	Ribonucleoside-diphosphate reductase subunit M2	RRM2
	1012	ENSG00000100526	0.306367	2.84963	2.29683	unchanged	Q16667;Q16667-2;F8WD24;H7C0S3;G3V2J7;A0A087WWK3	Cyclin-dependent kinase inhibitor 3	CDKN3
	1013	ENSG00000197885	0.3063	2.70465	2.18811	unchanged	Q9NYS0;G5E9P3	NF-kappa-B inhibitor-interacting Ras-like protein 1	NKIRAS1
	1014	ENSG00000147687	0.306033	2.97012	2.38512	unchanged	Q6P1N9;E5RG17;G5EA19;U3KQS5;H0YBX2;E5RGF2;A0A0D9SGD3;Q6P1N9-2	Putative deoxyribonuclease TATDN1	TATDN1
	1015	ENSG00000143499	0.305733	3.66278	2.89816	unchanged	Q9NRG4;Q9NRG4-2	N-lysine methyltransferase SMYD2	SMYD2
	1016	ENSG00000149311	0.305667	2.80302	2.2631	unchanged	Q13315;E9PIN0	Serine-protein kinase ATM	ATM
	1017	ENSG00000102241	0.305633	3.95345	3.11263	unchanged	O43719	HIV Tat-specific factor 1	HTATSF1
	1018	ENSG00000103245	0.305467	1.54384	1.2824	unchanged	Q9H6Q4;Q9H6Q4-3;Q9H6Q4-2;H3BSH2	Cytosolic Fe-S cluster assembly factor NARFL	NARFL
	1019	ENSG00000187147	0.305433	3.64916	2.88759	unchanged	Q5VTB9;Q5TDE7;Q5TDE8	E3 ubiquitin-protein ligase RNF220	RNF220
	1020	NA	0.305367	2.32352	1.90036	unchanged	C4AMC7;Q6VEQ5;A8K0Z3;A8MWX3	Putative WAS protein family homolog 3;WAS protein family homolog 2;WAS protein family homolog 1;Putative WAS protein family homolog 4	WASH3P;WASH2P;WASH1;WASH4P
	1021	ENSG00000144591	0.305233	3.57303	2.82836	unchanged	Q96IJ6;Q96IJ6-2;A0A087WUI8;F8WD54	Mannose-1-phosphate guanyltransferase alpha	GMPPA
	1022	ENSG00000204351	0.305133	3.51782	2.78755	unchanged	Q15477	Helicase SKI2W	SKIV2L
	1023	ENSG00000110063	0.305133	3.80653	2.99974	unchanged	Q96C86;A0A3B3ITF0	m7GpppX diphosphatase	DCPS
	1024	ENSG00000128050	0.305067	3.5594	2.81847	unchanged	E9PBS1	NA	PAICS
	1025	ENSG00000081307	0.304967	2.75347	2.22644	unchanged	Q9GZZ9;E7EQ61;Q9GZZ9-2;E7EWE1	Ubiquitin-like modifier-activating enzyme 5	UBA5
	1026	ENSG00000138646	0.304533	3.83562	3.02119	unchanged	Q9UII4;E9PBL0	E3 ISG15--protein ligase HERC5	HERC5
	1027	ENSG00000069966	0.304367	2.00187	1.64636	unchanged	O14775;O14775-3;O14775-2;H0YNW7;Q96F32	Guanine nucleotide-binding protein subunit beta-5	GNB5
	1028	ENSG00000118960	0.304367	2.40319	1.9608	unchanged	Q53T59;F6TR53	HCLS1-binding protein 3	HS1BP3
	1029	ENSG00000126216	0.3043	3.87794	3.05309	unchanged	Q96CW5;Q96CW5-2;A0A3B3ITE3;A0A087WU06;Q96CW5-3	Gamma-tubulin complex component 3	TUBGCP3
	1030	ENSG00000140299	0.303933	2.30176	1.8835	unchanged	Q12982;J3KN59;Q12982-2	BCL2/adenovirus E1B 19 kDa protein-interacting protein 2	BNIP2
	1031	ENSG00000260027	0.303833	3.49249	2.76726	unchanged	P09629	Homeobox protein Hox-B7	HOXB7
	1032	ENSG00000109089	0.3038	3.23156	2.57342	unchanged	Q86X02	Cerebellar degeneration-related protein 2-like	CDR2L
	1033	ENSG00000123352	0.303733	2.42701	1.97992	unchanged	Q86XZ4	Spermatogenesis-associated serine-rich protein 2	SPATS2
	1034	ENSG00000154277	0.303533	1.54162	1.28049	unchanged	P09936;D6RE83;D6R956;D6R974	Ubiquitin carboxyl-terminal hydrolase isozyme L1;Ubiquitin carboxyl-terminal hydrolase	UCHL1
	1035	ENSG00000134419	0.3035	3.06172	2.45227	unchanged	P62244;I3L3P7	40S ribosomal protein S15a	RPS15A
	1036	ENSG00000099810	0.303467	2.38569	1.94842	unchanged	Q13126;B4DUC8;Q13126-4;Q13126-3;Q13126-2;J3QSB7;Q13126-7;Q13126-6;Q13126-5;F2Z2F3	S-methyl-5-thioadenosine phosphorylase;Purine nucleoside phosphorylase	MTAP
	1037	ENSG00000161217	0.303033	3.38325	2.68876	unchanged	P49585;C9JEJ2;C9J050	Choline-phosphate cytidylyltransferase A	PCYT1A
	1038	ENSG00000105220	0.302767	3.60327	2.85325	unchanged	P06744;A0A2U3TZU2;P06744-2;K7EQ48;A0A2R8Y6C7;A0A0J9YXP8	Glucose-6-phosphate isomerase	GPI
	1039	ENSG00000169032	0.3027	2.90019	2.33306	unchanged	Q02750;Q02750-2	Dual specificity mitogen-activated protein kinase kinase 1	MAP2K1
	1040	ENSG00000114062	0.302533	3.14312	2.50965	unchanged	Q05086;Q05086-3;Q05086-2;A0A1B0GVL3;A0A0D9SG77	Ubiquitin-protein ligase E3A	UBE3A
	1041	ENSG00000164068	0.302467	1.56196	1.2966	unchanged	Q5XPI4;C9JS59;C9J266;Q5XPI4-2	E3 ubiquitin-protein ligase RNF123	RNF123
	1042	ENSG00000167674	0.302367	3.48386	2.76086	unchanged	Q7Z4V5-2;Q7Z4V5;Q7Z4V5-4;Q7Z4V5-3	Hepatoma-derived growth factor-related protein 2	HDGFRP2
	1043	ENSG00000116604	0.302067	2.58553	2.09711	unchanged	Q14814;Q14814-4;Q05BX2;Q14814-6;Q14814-3;Q14814-5;Q14814-2	Myocyte-specific enhancer factor 2D	MEF2D
	1044	ENSG00000142453	0.301567	2.92376	2.35099	unchanged	Q86X55;Q86X55-1;Q86X55-2;K7EQA8	Histone-arginine methyltransferase CARM1	CARM1
	1045	ENSG00000145191	0.301533	3.44249	2.73152	unchanged	Q13144;A0A3B3IUB1;A0A3B3ITG6;A0A3B3ISX3;A0A3B3ISM8;A0A3B3IUF2;A0A3B3IRP4;A0A3B3IS56;A0A3B3ITQ2	Translation initiation factor eIF-2B subunit epsilon	EIF2B5
	1046	ENSG00000051108	0.301467	2.34317	1.91565	unchanged	Q15011;Q15011-3;Q15011-4;Q15011-2;H3BTA8;H3BTT7;H3BP08	Homocysteine-responsive endoplasmic reticulum-resident ubiquitin-like domain member 1 protein	HERPUD1
	1047	ENSG00000092098	0.301067	2.09172	1.71842	unchanged	Q96EP0;H0YKX0;Q96EP0-3;A0A0B4J293;H0YMG4;Q96EP0-2	E3 ubiquitin-protein ligase RNF31	RNF31
	1048	ENSG00000169375	0.300833	2.65544	2.15256	unchanged	Q96ST3	Paired amphipathic helix protein Sin3a	SIN3A
	1049	ENSG00000182196	0.300833	3.01318	2.41685	unchanged	Q66PJ3	ADP-ribosylation factor-like protein 6-interacting protein 4	ARL6IP4
	1050	ENSG00000013561	0.3005	2.67883	2.17036	unchanged	Q9UBS8;D6RA38;Q9UBS8-2	E3 ubiquitin-protein ligase RNF14	RNF14
	1051	ENSG00000126247	0.300367	3.00715	2.41368	unchanged	P04632;A0A0C4DGQ5;K7ELJ7;K7EM73;K7EIV0;A0A075B7C0;U3KQE2;K7EKD8	Calpain small subunit 1	CAPNS1
	1052	ENSG00000186318	0.3003	2.98762	2.39769	unchanged	P56817;E9PJG7;P56817-6;P56817-5;P56817-2;P56817-4;P56817-3	Beta-secretase 1	BACE1
	1053	ENSG00000100764	0.300133	2.93895	2.36238	unchanged	P62191;P62191-2	26S protease regulatory subunit 4	PSMC1
	1054	ENSG00000126088	0.3	2.4917	2.02635	unchanged	P06132;A0A1B0GVZ4;A0A1B0GVN9;A0A494C0Q8;A0A494C085;Q5T446;A0A494BZY8;H0Y5R6;A0A494C0S8;A0A494C007	Uroporphyrinogen decarboxylase	UROD
	1055	ENSG00000152061	0.299933	1.46352	1.21515	unchanged	Q5R372;Q5R372-4;Q5R372-3;A0A0C4DG54;Q5R372-2;A0A0U1RQY6	Rab GTPase-activating protein 1-like	RABGAP1L
	1056	ENSG00000152601	0.299933	1.78269	1.47452	unchanged	Q9NR56;C9JP00;A0A0A0MQX8;Q86VM6;H7C4T5;Q9NR56-3;Q9NR56-4;Q9NR56-7;Q9NR56-6;Q9NR56-2;Q9NR56-5	Muscleblind-like protein 1	MBNL1
	1057	ENSG00000123106	0.299933	2.5082	2.04061	unchanged	Q7Z6B0;Q7Z6B0-2;F5GWR1;A0A0A0MTP0;A0A0A0MTK0;Q7Z6B0-3	Coiled-coil domain-containing protein 91	CCDC91
	1058	ENSG00000112079	0.299867	2.60967	2.11706	unchanged	Q15208	Serine/threonine-protein kinase 38	STK38
	1059	ENSG00000138050	0.299833	3.07836	2.46477	unchanged	Q9BTF0;Q9BTF0-2;H7C5V1	THUMP domain-containing protein 2	THUMPD2
	1060	ENSG00000117592	0.299567	2.56653	2.08396	unchanged	P30041	Peroxiredoxin-6	PRDX6
	1061	ENSG00000196588	0.2995	2.23744	1.8324	unchanged	A0A494BZX7;B0QY83;A0A499FIJ6;Q969V6;E7ER32;A0A087X287;A0A087WVL2;A0A087WU73;W0Z7M9	MKL/myocardin-like protein 1	MKL1;mkl1
	1062	ENSG00000167658	0.299467	2.4609	2.00397	unchanged	P13639	Elongation factor 2	EEF2
	1063	ENSG00000155629	0.2993	2.0759	1.70577	unchanged	Q6ZUJ8;Q6ZUJ8-2;Q6ZUJ8-3	Phosphoinositide 3-kinase adapter protein 1	PIK3AP1
	1064	ENSG00000277258	0.299067	3.58458	2.8374	unchanged	P35227	Polycomb group RING finger protein 2	PCGF2
	1065	ENSG00000054116	0.298933	3.13475	2.50417	unchanged	O43617;A0A087WWM0;A0A087WYS5;O43617-2	Trafficking protein particle complex subunit 3	TRAPPC3
	1066	ENSG00000196792	0.2986	3.12347	2.49673	unchanged	Q13033;G3V340	Striatin-3	STRN3
	1067	ENSG00000172009	0.2984	2.82152	2.27689	unchanged	P52888;K7EP46	Thimet oligopeptidase	THOP1
	1068	ENSG00000100605	0.2983	1.38657	1.15273	unchanged	Q13572;G3V4M9;Q13572-2	Inositol-tetrakisphosphate 1-kinase	ITPK1
	1069	ENSG00000151445	0.2977	2.1518	1.76333	unchanged	Q9H9C1;G3V4K3;Q9H9C1-2	Spermatogenesis-defective protein 39 homolog	VIPAS39
	1070	ENSG00000102879	0.2977	3.13756	2.50577	unchanged	P31146;H3BRY3	Coronin-1A;Coronin	CORO1A
	1071	ENSG00000180370	0.2975	2.98107	2.39309	unchanged	Q13177	Serine/threonine-protein kinase PAK 2;PAK-2p27;PAK-2p34	PAK2
	1072	ENSG00000130147	0.2972	3.71821	2.93667	unchanged	Q9P0V3;Q9P0V3-2	SH3 domain-binding protein 4	SH3BP4
	1073	ENSG00000163961	0.297133	3.3941	2.69709	unchanged	Q8IYW5	E3 ubiquitin-protein ligase RNF168	RNF168
	1074	ENSG00000070371	0.297	2.47644	2.01534	unchanged	P53675;P53675-2;A0A087WX41	Clathrin heavy chain 2	CLTCL1
	1075	ENSG00000067064	0.296967	3.38111	2.68733	unchanged	Q13907;Q13907-2	Isopentenyl-diphosphate Delta-isomerase 1	IDI1
	1076	ENSG00000013573	0.296833	2.64219	2.14163	unchanged	Q96FC9-2;Q96FC9-4;Q96FC9-3;Q96FC9	Probable ATP-dependent RNA helicase DDX11	DDX11
	1077	ENSG00000270800	0.296667	2.58229	2.0954	unchanged	A0A1W2PQS6;F6U211;A0A2R8Y7H1;S4R435;A0A2R8YFH6	NA	RPS10;RPS10-NUDT3
	1078	ENSG00000128245	0.296467	2.2477	1.84015	unchanged	Q04917;A2IDB2	14-3-3 protein eta	YWHAH
	1079	ENSG00000163481	0.296367	3.22434	2.56845	unchanged	Q96BH1	E3 ubiquitin-protein ligase RNF25	RNF25
	1080	ENSG00000153048	0.296333	2.423	1.97715	unchanged	Q9Y2V2;H3BSW7;H3BUY4;H3BPY5;H3BNU9	Calcium-regulated heat stable protein 1	CARHSP1
	1081	ENSG00000160209	0.296133	2.74437	2.22017	unchanged	O00764;F2Z2Y4;O00764-3;O00764-2	Pyridoxal kinase	PDXK
	1082	ENSG00000131467	0.296033	2.66568	2.16064	unchanged	P61289;P61289-3;P61289-2;K9J957;B3KQ25;K7ESG5;K7ENH2;A0A087WTV2;K7EPX6;K7EKR3	Proteasome activator complex subunit 3	PSME3
	1083	ENSG00000141994	0.2953	3.43172	2.72508	unchanged	Q96G46;Q96G46-2;Q96G46-3	tRNA-dihydrouridine(47) synthase [NAD(P)(+)]-like	DUS3L
	1084	ENSG00000125885	0.295167	2.46891	2.01015	unchanged	Q9UJA3;A0A494C100;Q9UJA3-2;Q9UJA3-4;Q9UJA3-3	DNA helicase MCM8	MCM8
	1085	ENSG00000143621	0.2949	2.32918	1.90497	unchanged	Q12905;B4DY09	Interleukin enhancer-binding factor 2	ILF2
	1086	ENSG00000071205	0.294733	2.86589	2.3098	unchanged	A1A4S6	Rho GTPase-activating protein 10	ARHGAP10
	1087	ENSG00000020426	0.294533	3.84524	3.02822	unchanged	P51948;H0YJ92;H0YJF2;P51948-2	CDK-activating kinase assembly factor MAT1	MNAT1
	1088	ENSG00000227715	0.294467	3.46556	2.74818	unchanged	A0A140T9I0;A0A140T9X5;A0A140T913;A0A140T955;A0A140T933;A0A1W2PPQ2;A0A1W2PRT9	NA	NA
	1089	ENSG00000104356	0.294233	3.15479	2.51718	unchanged	Q99575	Ribonucleases P/MRP protein subunit POP1	POP1
	1090	ENSG00000104643	0.294067	2.56162	2.08014	unchanged	Q96QG7;Q96QG7-2	Myotubularin-related protein 9	MTMR9
	1091	ENSG00000110442	0.294067	3.10735	2.48694	unchanged	Q9P000;Q9P000-2	COMM domain-containing protein 9	COMMD9
	1092	ENSG00000149313	0.294	2.84584	2.29464	unchanged	Q9NRN7;E9PLW6;E9PNF3	L-aminoadipate-semialdehyde dehydrogenase-phosphopantetheinyl transferase	AASDHPPT
	1093	ENSG00000249115	0.293867	2.12775	1.74463	unchanged	O94927	HAUS augmin-like complex subunit 5	HAUS5
	1094	ENSG00000170445	0.293567	2.57631	2.09216	unchanged	P12081;P12081-2;B3KWE1;P12081-4;P12081-3;B4DDD8;B4E1C5;E7ETE2	Histidine--tRNA ligase, cytoplasmic	HARS
	1095	ENSG00000116698	0.293567	2.998	2.40651	unchanged	Q92540;E9PD50;Q92540-2;Q92540-4;Q92540-5;B1ALB4	Protein SMG7	SMG7
	1096	ENSG00000087460	0.2935	3.24961	2.58503	unchanged	P63092;Q5JWF2;P63092-4;A0A590UJ58;B0AZR9;A0A590UJY2;A0A590UJR6;A0A590UJI6;A0A590UJQ9;A0A590UKB4;A0A590UJQ2	Guanine nucleotide-binding protein G(s) subunit alpha isoforms short;Guanine nucleotide-binding protein G(s) subunit alpha isoforms XLas	GNAS
	1097	ENSG00000161021	0.293467	2.85006	2.29706	unchanged	Q92585	Mastermind-like protein 1	MAML1
	1098	ENSG00000101940	0.293233	1.35876	1.13007	unchanged	Q9H1Z4;Q9H1Z4-2;A0A087X091	WD repeat-containing protein 13	WDR13
	1099	ENSG00000089154	0.292867	3.07804	2.46468	unchanged	Q92616	Translational activator GCN1	GCN1L1
	1100	ENSG00000005448	0.292767	2.74581	2.22105	unchanged	Q9H977;Q9H977-4;C9J016;Q9H977-3	WD repeat-containing protein 54	WDR54
	1101	ENSG00000091164	0.292767	2.76319	2.23407	unchanged	O43396;K7ER96	Thioredoxin-like protein 1	TXNL1
	1102	ENSG00000167513	0.292333	1.47496	1.2249	unchanged	Q9H211	DNA replication factor Cdt1	CDT1
	1103	ENSG00000198700	0.291767	2.15046	1.76227	unchanged	Q96P70	Importin-9	IPO9
	1104	ENSG00000198056	0.2916	3.42892	2.72313	unchanged	P49642;A0A5F9ZHB6;F8VNY2	DNA primase small subunit;DNA primase	PRIM1
	1105	ENSG00000064933	0.291333	3.01673	2.41948	unchanged	P54277;P54277-3;P54277-2;B7ZAA0;E9PC65;P54277-4;Q5FBZ9;Q3BDU3	PMS1 protein homolog 1	PMS1
	1106	ENSG00000023909	0.291233	2.37814	1.94303	unchanged	P48507;P48507-2	Glutamate--cysteine ligase regulatory subunit	GCLM
	1107	ENSG00000115365	0.291233	3.01963	2.42172	unchanged	O43813;E9PHS0	LanC-like protein 1	LANCL1
	1108	ENSG00000082781	0.290833	2.36805	1.93539	unchanged	P18084;V9GZ57;H7C5U2	Integrin beta-5;Integrin beta	ITGB5
	1109	ENSG00000104880	0.290733	2.43355	1.98468	unchanged	Q6ZSZ5;A0A3B3IPE9;A0A087WZG4;Q6ZSZ5-2;Q6ZSZ5-1;Q6ZSZ5-6;Q6ZSZ5-5;M0QZS0;A0A590UK10	Rho guanine nucleotide exchange factor 18	ARHGEF18
	1110	ENSG00000011275	0.290633	2.70256	2.18671	unchanged	Q9NWF9;Q9NWF9-1;Q9NWF9-3	E3 ubiquitin-protein ligase RNF216	RNF216
	1111	ENSG00000147457	0.290467	2.24805	1.84015	unchanged	Q8WUX9	Charged multivesicular body protein 7	CHMP7
	1112	ENSG00000185420	0.290267	2.70074	2.18549	unchanged	Q9H7B4;Q9H7B4-3;B0QZ88;Q9H7B4-2	Histone-lysine N-methyltransferase SMYD3	SMYD3
	1113	ENSG00000204469	0.290167	3.5791	2.83301	unchanged	P48634;P48634-3;P48634-2;P48634-4	Protein PRRC2A	PRRC2A
	1114	ENSG00000086619	0.289933	1.56049	1.29579	unchanged	Q86YB8;Q5TAE8	ERO1-like protein beta	ERO1LB
	1115	ENSG00000169696	0.2895	3.55514	2.81515	unchanged	Q9BZE9;Q9BZE9-2;J3QL04;Q9BZE9-3;Q9BZE9-4;J3QR12;J3KRY8	Tether containing UBX domain for GLUT4	ASPSCR1
	1116	ENSG00000159593	0.2893	3.35565	2.66776	unchanged	Q13564;Q13564-2;Q13564-3;Q13564-4	NEDD8-activating enzyme E1 regulatory subunit	NAE1
	1117	ENSG00000106665	0.289267	1.59196	1.32038	unchanged	Q9UDT6;Q9UDT6-2	CAP-Gly domain-containing linker protein 2	CLIP2
	1118	ENSG00000133612	0.288967	3.207	2.55674	unchanged	Q96P47;Q96P47-2;Q96P47-4;Q96P47-3;Q96P47-6;C9J975;Q96P47-5	Arf-GAP with GTPase, ANK repeat and PH domain-containing protein 3	AGAP3
	1119	ENSG00000170832	0.288633	2.09377	1.71994	unchanged	Q8NFA0;K7EQL6	Ubiquitin carboxyl-terminal hydrolase 32;Ubiquitin carboxyl-terminal hydrolase	USP32
	1120	ENSG00000067225	0.2886	2.68268	2.17335	unchanged	P14618;P14618-3;B4DNK4;H3BQ34	Pyruvate kinase PKM;Pyruvate kinase	PKM
	1121	ENSG00000067221	0.288567	2.66597	2.16075	unchanged	Q9UBI4;H3BVF2;H3BQA9;H3BST3;Q9UBI4-6;Q9UBI4-5;Q9UBI4-3;H3BPC1;Q9UBI4-4;Q9UBI4-2	Stomatin-like protein 1	STOML1
	1122	ENSG00000170364	0.2882	2.9207	2.34877	unchanged	Q53H47;Q53H47-3;B9ZVV8	Histone-lysine N-methyltransferase SETMAR;Histone-lysine N-methyltransferase;Transposon Hsmar1 transposase	SETMAR
	1123	ENSG00000172890	0.288033	1.94938	1.60461	unchanged	Q6IA69;A0A0B4J216;Q6IA69-2	Glutamine-dependent NAD(+) synthetase	NADSYN1
	1124	ENSG00000184575	0.288033	2.05213	1.68765	unchanged	O43592	Exportin-T	XPOT
	1125	ENSG00000169710	0.2879	3.66421	2.89871	unchanged	P49327;A0A0U1RQF0	Fatty acid synthase;[Acyl-carrier-protein] S-acetyltransferase;[Acyl-carrier-protein] S-malonyltransferase;3-oxoacyl-[acyl-carrier-protein] synthase;3-oxoacyl-[acyl-carrier-protein] reductase;3-hydroxyacyl-[acyl-carrier-protein] dehydratase;Enoyl-[acyl-carrier-protein] reductase;Oleoyl-[acyl-carrier-protein] hydrolase	FASN
	1126	ENSG00000168297	0.287467	2.71498	2.19695	unchanged	Q7Z7A4;W5RWE6;Q7Z7A4-5;Q7Z7A4-7;Q7Z7A4-6;Q7Z7A4-4;Q7Z7A4-2;H7C4V0;E9PD56;H7BYG4;A0A0C4DG95;Q7Z7A4-3	PX domain-containing protein kinase-like protein	PXK
	1127	ENSG00000172757	0.287367	2.10899	1.73132	unchanged	P23528;G3V1A4;E9PK25;E9PP50;E9PQB7;E9PLJ3;E9PS23	Cofilin-1	CFL1
	1128	ENSG00000152133	0.287333	2.86762	2.31057	unchanged	Q8N954;Q8N954-2	G patch domain-containing protein 11	GPATCH11
	1129	ENSG00000175213	0.2873	2.74906	2.22336	unchanged	Q9H9D4	Zinc finger protein 408	ZNF408
	1130	ENSG00000135632	0.287233	1.97456	1.62464	unchanged	Q6GMV2;C9IYN9	SET and MYND domain-containing protein 5	SMYD5
	1131	ENSG00000089157	0.287167	2.58839	2.09962	unchanged	P05388;F8VWS0;P05388-2;F8VW21;F8VU65;F8VZS0;Q8NHW5;F8VPE8;G3V210	60S acidic ribosomal protein P0;60S acidic ribosomal protein P0-like	RPLP0;RPLP0P6
	1132	ENSG00000075131	0.287133	1.91728	1.57971	unchanged	Q9BVW5;H3BU04	TIMELESS-interacting protein	TIPIN
	1133	ENSG00000114738	0.2871	2.52295	2.05157	unchanged	Q16644;C9J8E1;C9JPW3	MAP kinase-activated protein kinase 3	MAPKAPK3
	1134	ENSG00000122970	0.287	2.30963	1.88989	unchanged	Q8WYA0;H0YHE2;Q8WYA0-4	Intraflagellar transport protein 81 homolog	IFT81
	1135	ENSG00000051620	0.286867	2.52755	2.05486	unchanged	Q9Y5Z4;Q9Y5Z4-2	Heme-binding protein 2	HEBP2
	1136	ENSG00000162704	0.286767	3.23577	2.57634	unchanged	O15511;B1ALC0;O15511-2	Actin-related protein 2/3 complex subunit 5	ARPC5
	1137	ENSG00000100364	0.286433	2.09539	1.72128	unchanged	Q6ICG6;B0QY16;Q6ICG6-3;Q6ICG6-2;B0QY18;B0QY20	Uncharacterized protein KIAA0930	KIAA0930
	1138	ENSG00000250151	0.286133	3.2255	2.56915	unchanged	A0A0A6YYG9;P59998-2;P59998;F8WDD7;H7C0A3;F8WCF6;P59998-3	Actin-related protein 2/3 complex subunit 4	ARPC4-TTLL3;ARPC4
	1139	ENSG00000132017	0.286033	2.01723	1.65896	unchanged	Q66K64	DDB1- and CUL4-associated factor 15	DCAF15
	1140	ENSG00000156535	0.286033	2.93265	2.35735	unchanged	Q6YHK3;Q6YHK3-2;Q6YHK3-4	CD109 antigen	CD109
	1141	ENSG00000141425	0.285833	3.1368	2.50525	unchanged	Q96P16;A0A0C4DGQ6;Q96P16-3	Regulation of nuclear pre-mRNA domain-containing protein 1A	RPRD1A
	1142	ENSG00000125354	0.285733	3.47771	2.7562	unchanged	Q14141;B1AMS2;Q14141-2;Q14141-4	Septin-6	SEPTIN6
	1143	ENSG00000143727	0.285267	1.86371	1.53763	unchanged	P24666;G5E9R5;P24666-4	Low molecular weight phosphotyrosine protein phosphatase	ACP1
	1144	ENSG00000125459	0.284967	3.09676	2.47734	unchanged	Q9BUK6;A0A3B3IUD2;Q9BUK6-7;Q9BUK6-3;Q9BUK6-2;Q9BUK6-5	Protein misato homolog 1	MSTO1
	1145	ENSG00000141741	0.284633	2.09101	1.71784	unchanged	Q9BRT3;J3KTI2	Migration and invasion enhancer 1	MIEN1
	1146	ENSG00000101220	0.284433	1.71398	1.4181	unchanged	Q9GZN8;Q9GZN8-2	UPF0687 protein C20orf27	C20orf27
	1147	ENSG00000239857	0.2842	2.38858	1.95023	unchanged	Q7L5D6;Q7L5D6-2	Golgi to ER traffic protein 4 homolog	GET4
	1148	ENSG00000165609	0.284133	3.12717	2.49923	unchanged	Q9UKK9;A6NFX8;A6NJU6;A6NCQ0	ADP-sugar pyrophosphatase	NUDT5
	1149	ENSG00000091073	0.283933	2.39728	1.95692	unchanged	Q86UW9-2;Q86UW9;E7ET89	Probable E3 ubiquitin-protein ligase DTX2	DTX2
	1150	ENSG00000198554	0.283767	3.39739	2.69924	unchanged	O75717;O75717-2	WD repeat and HMG-box DNA-binding protein 1	WDHD1
	1151	ENSG00000131473	0.283733	2.83906	2.28966	unchanged	P53396;P53396-2;P53396-3	ATP-citrate synthase	ACLY
	1152	ENSG00000166913	0.283667	3.24532	2.58301	unchanged	P31946;P31946-2	14-3-3 protein beta/alpha;14-3-3 protein beta/alpha, N-terminally processed	YWHAB
	1153	ENSG00000108669	0.283467	1.49331	1.24043	unchanged	Q15438;Q15438-3;Q15438-2;K7ENQ8	Cytohesin-1	CYTH1
	1154	ENSG00000156253	0.282967	2.51098	2.04255	unchanged	P57060	RWD domain-containing protein 2B	RWDD2B
	1155	ENSG00000104529	0.282867	2.69388	2.18084	unchanged	P29692-2;E9PRY8;A0A087X1X7	Elongation factor 1-delta	EEF1D
	1156	ENSG00000130985	0.2827	3.026	2.4263	unchanged	P22314	Ubiquitin-like modifier-activating enzyme 1	UBA1
	1157	ENSG00000125812	0.2822	3.14925	2.51371	unchanged	Q9H116	GDNF-inducible zinc finger protein 1	GZF1
	1158	ENSG00000090975	0.282133	1.38123	1.14855	unchanged	Q9BZ72;Q9BZ72-2;S4R414;Q9BZ72-3	Membrane-associated phosphatidylinositol transfer protein 2	PITPNM2
	1159	ENSG00000140553	0.2818	2.54049	2.06438	unchanged	Q9H3U1;A0A1W2PNX8	Protein unc-45 homolog A	UNC45A
	1160	ENSG00000168014	0.2815	2.28401	1.86868	unchanged	Q4AC94;Q4AC94-2;Q4AC94-4;Q4AC94-1;Q4AC94-3	C2 domain-containing protein 3	C2CD3
	1161	ENSG00000159322	0.281367	2.10968	1.73142	unchanged	Q9BRR6;Q9BRR6-2;H3BRS6	ADP-dependent glucokinase	ADPGK
	1162	ENSG00000141971	0.280767	2.27385	1.86116	unchanged	Q96EY5;E9PQA6;Q96EY5-3;Q96EY5-2;E9PLL0	Multivesicular body subunit 12A	MVB12A
	1163	ENSG00000090861	0.2807	2.52855	2.05525	unchanged	P49588;P49588-2	Alanine--tRNA ligase, cytoplasmic	AARS
	1164	ENSG00000178773	0.280667	2.26575	1.85421	unchanged	Q9UBL6;Q9UBL6-2	Copine-7	CPNE7
	1165	ENSG00000014641	0.280667	2.60751	2.11526	unchanged	P40925;P40925-3;A0A5K1VW95;B9A041;P40925-2;B8ZZ51;C9JF79	Malate dehydrogenase, cytoplasmic;Malate dehydrogenase	MDH1
	1166	ENSG00000137996	0.279933	2.02994	1.66987	unchanged	O00442;O00442-2	RNA 3-terminal phosphate cyclase	RTCA
	1167	ENSG00000108578	0.279933	3.23815	2.57847	unchanged	Q13867;K7ESE8;J3KSD8;K7ES02	Bleomycin hydrolase	BLMH
	1168	ENSG00000085982	0.2799	2.15986	1.7693	unchanged	Q9NVE5;Q9NVE5-3	Ubiquitin carboxyl-terminal hydrolase 40	USP40
	1169	ENSG00000120265	0.2799	2.62857	2.13174	unchanged	P22061;A0A0A0MRJ6;H7BY58;P22061-2;F6S8N6;A0A3F2YNX8	Protein-L-isoaspartate(D-aspartate) O-methyltransferase;Protein-L-isoaspartate O-methyltransferase	PCMT1
	1170	ENSG00000139436	0.279867	2.54144	2.06483	unchanged	Q14161;Q14161-9;Q14161-5;Q14161-7;Q14161-8;Q14161-3;R4GNG3;F8VXI9;Q14161-2;Q14161-11;Q14161-6;Q14161-4;Q14161-10;F8WAK2;F8W822	ARF GTPase-activating protein GIT2	GIT2
	1171	ENSG00000183765	0.2798	2.38652	1.9491	unchanged	O96017;O96017-9;O96017-12;O96017-4;O96017-7;O96017-13;O96017-8;H0Y820	Serine/threonine-protein kinase Chk2	CHEK2
	1172	ENSG00000105185	0.2797	1.34592	1.11982	unchanged	O14737;O14737-2;K7ESJ4;K7EQA1	Programmed cell death protein 5	PDCD5
	1173	ENSG00000130714	0.279667	2.81729	2.27404	unchanged	Q9Y6A1;Q9Y6A1-4;Q9Y6A1-3;Q9Y6A1-2;Q5JT04;Q5JT03;Q5JT02	Protein O-mannosyl-transferase 1	POMT1
	1174	ENSG00000162607	0.279667	2.83829	2.28935	unchanged	O94782	Ubiquitin carboxyl-terminal hydrolase 1	USP1
	1175	ENSG00000113643	0.2795	2.72955	2.20835	unchanged	P54136;P54136-2	Arginine--tRNA ligase, cytoplasmic	RARS
	1176	ENSG00000110429	0.278733	2.12908	1.74547	unchanged	Q9UK99;E9PJM3;Q9UK99-2;Q9UK99-3;B4E3U2;E9PL46;G3V1E0	F-box only protein 3	FBXO3
	1177	ENSG00000212747	0.2783	2.18869	1.79243	unchanged	Q17RB0;A6ZKI3;Q9BWD3	Protein FAM127C;Protein FAM127A;Protein FAM127B	FAM127C;FAM127A;FAM127B
	1178	ENSG00000205659	0.278267	2.23279	1.82875	unchanged	Q52LA3	Protein lin-52 homolog	LIN52
	1179	ENSG00000103249	0.2782	2.64962	2.14727	unchanged	P51798;P51798-2;H0Y2M6;H3BNG8;I3L470	H(+)/Cl(-) exchange transporter 7	CLCN7
	1180	ENSG00000100154	0.277933	2.86195	2.30655	unchanged	Q96AY4;A0A087WW06	Tetratricopeptide repeat protein 28	TTC28
	1181	ENSG00000072864	0.277733	3.0088	2.41489	unchanged	Q9NXR1;Q9NXR1-1;I3L2R9;I3L522;I3L2R3;I3L533	Nuclear distribution protein nudE homolog 1	NDE1
	1182	ENSG00000110719	0.2776	3.07922	2.46502	unchanged	Q13488;Q13488-2	V-type proton ATPase 116 kDa subunit a isoform 3	TCIRG1
	1183	ENSG00000138162	0.277533	3.11673	2.49236	unchanged	O95359;D6RAA5;Q4VXL8;E7EMZ9;E9PBC6;O95359-6;O95359-1;O95359-5;O95359-3;O95359-2;Q4VXL4;A0A0U1RRM9	Transforming acidic coiled-coil-containing protein 2	TACC2
	1184	ENSG00000166813	0.2772	2.9309	2.35624	unchanged	Q2M1P5	Kinesin-like protein KIF7	KIF7
	1185	ENSG00000085662	0.2769	3.2773	2.60483	unchanged	P15121;E9PCX2	Aldose reductase	AKR1B1
	1186	ENSG00000146425	0.276867	2.1089	1.73132	unchanged	P63172	Dynein light chain Tctex-type 1	DYNLT1
	1187	ENSG00000056050	0.276733	2.99324	2.40241	unchanged	Q9NWY4	UPF0609 protein C4orf27	C4orf27
	1188	ENSG00000198585	0.275933	2.00724	1.65065	unchanged	Q96DE0;Q96DE0-3	U8 snoRNA-decapping enzyme	NUDT16
	1189	ENSG00000105671	0.275767	2.82249	2.27764	unchanged	Q9Y6V7;Q9Y6V7-2	Probable ATP-dependent RNA helicase DDX49	DDX49
	1190	ENSG00000204389	0.275333	2.72926	2.20825	unchanged	P0DMV8;A0A0G2JIW1;P0DMV9;P0DMV8-2;V9GZ37	Heat shock 70 kDa protein 1A;Heat shock 70 kDa protein 1B	HSPA1A;HSPA1B
	1191	ENSG00000101911	0.2753	3.16163	2.52108	unchanged	P11908;P11908-2	Ribose-phosphate pyrophosphokinase 2	PRPS2
	1192	ENSG00000149273	0.2748	2.2427	1.83666	unchanged	P23396;P23396-2;E9PPU1;E9PL09;F2Z2S8;H0YF32;H0YCJ7;H0YEU2	40S ribosomal protein S3	RPS3
	1193	ENSG00000039650	0.2747	2.62733	2.13068	unchanged	Q96T60;A0A0D9SFL2;M0QYH2;M0R3C8;M0QYI1;Q96T60-2	Bifunctional polynucleotide phosphatase/kinase;Polynucleotide 3-phosphatase;Polynucleotide 5-hydroxyl-kinase	PNKP
	1194	ENSG00000182552	0.274533	2.1156	1.73613	unchanged	Q6NW29;K4DI92;D6RCM5;D6RDH6;D6R9C7	RWD domain-containing protein 4	RWDD4
	1195	ENSG00000048342	0.274433	2.96843	2.38371	unchanged	Q9P2K1;D6R9V3;A0A494C1C5;A0A494C0X1;A0A140T8Y7;Q9P2K1-2	Coiled-coil and C2 domain-containing protein 2A	CC2D2A
	1196	ENSG00000198677	0.274067	2.57688	2.09217	unchanged	Q6PGP7	Tetratricopeptide repeat protein 37	TTC37
	1197	ENSG00000125970	0.274	1.87886	1.5492	unchanged	Q9UKM9;Q9UKM9-2;Q5QPL9;Q5QPM1;Q5QPM2;Q5QPM0	RNA-binding protein Raly	RALY
	1198	ENSG00000254772	0.274	2.24065	1.83524	unchanged	P26641;P26641-2	Elongation factor 1-gamma	EEF1G
	1199	ENSG00000100288	0.273767	1.23613	1.02877	unchanged	Q9Y259	Choline/ethanolamine kinase	CHKB
	1200	ENSG00000121988	0.2735	3.37811	2.68474	unchanged	Q5FWF4;Q5FWF4-3;F8WCT9;Q5FWF4-5	DNA annealing helicase and endonuclease ZRANB3;DNA annealing helicase ZRANB3;Endonuclease ZRANB3	ZRANB3
	1201	ENSG00000266028	0.273467	2.97419	2.38752	unchanged	O75044;B7ZM87;A0A075B7B5	SLIT-ROBO Rho GTPase-activating protein 2	SRGAP2
	1202	ENSG00000197170	0.273067	2.78538	2.25147	unchanged	O00232;O00232-2	26S proteasome non-ATPase regulatory subunit 12	PSMD12
	1203	ENSG00000123349	0.272967	2.94494	2.3675	unchanged	Q99471;H3BPF6;Q99471-3;H3BMQ1	Prefoldin subunit 5	PFDN5
	1204	ENSG00000138801	0.272733	2.58059	2.09459	unchanged	O43252	Bifunctional 3-phosphoadenosine 5-phosphosulfate synthase 1;Sulfate adenylyltransferase;Adenylyl-sulfate kinase	PAPSS1
	1205	ENSG00000103051	0.272667	2.39851	1.95768	unchanged	Q9H9E3;A0A0A0MS45;J3KNI1;Q9H9E3-3;Q9H9E3-2	Conserved oligomeric Golgi complex subunit 4	COG4
	1206	ENSG00000100241	0.272333	3.60633	2.85504	unchanged	O95248;O95248-4;O95248-5	Myotubularin-related protein 5	SBF1
	1207	ENSG00000164111	0.2723	2.31723	1.89586	unchanged	P08758;D6RBL5;D6RBE9	Annexin A5;Annexin	ANXA5
	1208	ENSG00000166908	0.272267	2.47806	2.01638	unchanged	Q8TBX8;Q8TBX8-3;Q8TBX8-2	Phosphatidylinositol 5-phosphate 4-kinase type-2 gamma	PIP4K2C
	1209	ENSG00000099399	0.272233	2.96752	2.38344	unchanged	O15479	Melanoma-associated antigen B2	MAGEB2
	1210	ENSG00000011105	0.272233	3.55475	2.81507	unchanged	A0A3B3IST1;B5MD23;O75954	Tetraspanin;Tetraspanin-9	TSPAN9
	1211	ENSG00000135655	0.271733	2.43337	1.98468	unchanged	Q9Y4E8;Q9Y4E8-2;Q9Y4E8-3	Ubiquitin carboxyl-terminal hydrolase 15	USP15
	1212	ENSG00000112640	0.2717	3.44072	2.73017	unchanged	Q14738;E9PFR3;Q14738-2;Q14738-3;H0Y8C4	Serine/threonine-protein phosphatase 2A 56 kDa regulatory subunit delta isoform	PPP2R5D
	1213	ENSG00000103363	0.2716	1.51427	1.25785	unchanged	Q15370;B8ZZU8;I3L0M9	Transcription elongation factor B polypeptide 2	TCEB2
	1214	ENSG00000138814	0.271533	3.31204	2.63209	unchanged	Q08209;Q08209-2;Q08209-3;E7ETC2;Q08209-5;Q08209-4	Serine/threonine-protein phosphatase 2B catalytic subunit alpha isoform;Serine/threonine-protein phosphatase	PPP3CA
	1215	ENSG00000124702	0.271333	3.07884	2.46502	unchanged	Q9BQ90;E7ERR0;F8W6A4	Kelch domain-containing protein 3	KLHDC3
	1216	ENSG00000173418	0.271133	3.12921	2.50103	unchanged	P61599;A8MZB2	N-alpha-acetyltransferase 20	NAA20
	1217	ENSG00000101868	0.271067	2.75631	2.22853	unchanged	P09884;A6NMQ1;A0A087WU64	DNA polymerase alpha catalytic subunit;DNA polymerase	POLA1
	1218	ENSG00000116750	0.2709	2.83625	2.28785	unchanged	Q5LJA5;Q9Y5K5-2;Q9Y5K5-4;Q9Y5K5-3;Q5LJB0	Ubiquitin carboxyl-terminal hydrolase;Ubiquitin carboxyl-terminal hydrolase isozyme L5	UCHL5
	1219	ENSG00000170185	0.2707	2.10143	1.72559	unchanged	Q8NB14;Q8NB14-2	Ubiquitin carboxyl-terminal hydrolase 38	USP38
	1220	ENSG00000008282	0.2704	1.63689	1.35428	unchanged	C9JYN0;Q16563-2;Q16563	Synaptophysin-like protein 1	SYPL1
	1221	ENSG00000103549	0.270333	3.0917	2.47393	unchanged	O75150;H3BP71;O75150-4;O75150-3	E3 ubiquitin-protein ligase BRE1B	RNF40
	1222	ENSG00000105397	0.269967	2.90197	2.33402	unchanged	P29597;E9PM19;E9PPF2	Non-receptor tyrosine-protein kinase TYK2;Tyrosine-protein kinase	TYK2
	1223	ENSG00000130449	0.2697	2.54997	2.0715	unchanged	Q9HCJ5	Zinc finger SWIM domain-containing protein 6	ZSWIM6
	1224	ENSG00000139977	0.269667	2.44311	1.99095	unchanged	Q147X3;Q147X3-2	N-alpha-acetyltransferase 30	NAA30
	1225	ENSG00000254999	0.269233	1.47852	1.22796	unchanged	Q8WUW1;Q8WUW1-2	Protein BRICK1	BRK1
	1226	ENSG00000249915	0.269167	2.92962	2.35557	unchanged	O75340;O75340-2;A0A024QZ42	Programmed cell death protein 6	PDCD6
	1227	ENSG00000127720	0.269	2.58231	2.0954	unchanged	Q8N6Q8;H0YIW7;F8VZA8	Methyltransferase-like protein 25	METTL25
	1228	ENSG00000165410	0.2683	2.33085	1.9059	unchanged	Q9Y281;Q9Y281-3	Cofilin-2	CFL2
	1229	ENSG00000213339	0.267933	2.94116	2.36416	unchanged	Q9BXR0	Queuine tRNA-ribosyltransferase	QTRT1
	1230	ENSG00000005893	0.267733	1.61504	1.33746	unchanged	P13473;P13473-2;P13473-3	Lysosome-associated membrane glycoprotein 2	LAMP2
	1231	ENSG00000189114	0.2676	1.41057	1.17304	unchanged	Q6QNY0;K7EN58	Biogenesis of lysosome-related organelles complex 1 subunit 3	BLOC1S3
	1232	ENSG00000123576	0.267533	1.83453	1.51567	unchanged	Q8N693	Homeobox protein ESX1;Homeobox protein ESX1-N;Homeobox protein ESX1-C	ESX1
	1233	ENSG00000154222	0.267167	2.09859	1.72316	unchanged	Q5T0F9;H0Y517;H7C1U3;Q5T0F9-3;Q5T0F9-2	Coiled-coil and C2 domain-containing protein 1B	CC2D1B
	1234	ENSG00000275052	0.267067	2.75994	2.23158	unchanged	Q5MIZ7;Q5MIZ7-3;Q5MIZ7-2	Serine/threonine-protein phosphatase 4 regulatory subunit 3B	SMEK2
	1235	ENSG00000143761	0.267033	2.64364	2.14291	unchanged	P84077;P61204;F5H423;F5H0C7;P61204-2	ADP-ribosylation factor 1;ADP-ribosylation factor 3	ARF1;ARF3
	1236	ENSG00000243725	0.266867	2.4605	2.00394	unchanged	O95801	Tetratricopeptide repeat protein 4	TTC4
	1237	ENSG00000174485	0.266867	2.62061	2.1259	unchanged	Q7Z401;Q7Z401-2;A0A0U1RR27;H3BTW5	C-myc promoter-binding protein	DENND4A
	1238	ENSG00000159131	0.266833	2.62858	2.13174	unchanged	P22102	Trifunctional purine biosynthetic protein adenosine-3;Phosphoribosylamine--glycine ligase;Phosphoribosylformylglycinamidine cyclo-ligase;Phosphoribosylglycinamide formyltransferase	GART
	1239	ENSG00000136381	0.2667	2.10894	1.73132	unchanged	P48200;H0YNL8;P48200-2	Iron-responsive element-binding protein 2	IREB2
	1240	ENSG00000136371	0.266467	3.27685	2.60464	unchanged	P49914;P49914-2;A0A0A6YYL1;A0A0U1RQM3	5-formyltetrahydrofolate cyclo-ligase	MTHFS;ST20-MTHFS
	1241	ENSG00000186260	0.266267	2.7883	2.25304	unchanged	Q9ULH7;Q9ULH7-4;Q9ULH7-5	MKL/myocardin-like protein 2	MKL2
	1242	ENSG00000139517	0.2661	3.28229	2.60875	unchanged	Q8N448	Ligand of Numb protein X 2	LNX2
	1243	ENSG00000257923	0.266067	3.04669	2.4409	unchanged	P39880-3;P39880;P39880-2;A0A2R8Y852;P39880-4;A0A2R8YDI1;P39880-5;P39880-6	Homeobox protein cut-like 1	CUX1
	1244	ENSG00000188229	0.266	2.1659	1.77384	unchanged	P68371	Tubulin beta-4B chain	TUBB4B
	1245	ENSG00000132394	0.265933	3.54182	2.80515	unchanged	P57772;P57772-2;C9J8T0	Selenocysteine-specific elongation factor	EEFSEC
	1246	ENSG00000127054	0.265833	3.01785	2.42016	unchanged	Q5TA45;Q5TA45-3;Q5TA45-2;Q5TA45-5;Q5TA45-4;A0A087WYI0;C9IYS7;Q96HV7;C9J979;J3QRY6;E9PNS4	Integrator complex subunit 11	CPSF3L
	1247	ENSG00000135698	0.265467	1.47149	1.22193	unchanged	Q99547;H3BSB3;H3BNT4	M-phase phosphoprotein 6	MPHOSPH6
	1248	ENSG00000063177	0.265433	2.63636	2.13687	unchanged	Q07020;H0YHA7;J3QQ67;Q07020-2;G3V203;F8VYV2;F8VUA6;A0A075B7A0	60S ribosomal protein L18	RPL18
	1249	ENSG00000172239	0.265133	3.20953	2.55801	unchanged	Q9H074;Q9H074-2;D6REB4	Polyadenylate-binding protein-interacting protein 1	PAIP1
	1250	ENSG00000111530	0.265033	2.68188	2.17285	unchanged	Q86VP6;Q86VP6-2;A0A0C4DGH5	Cullin-associated NEDD8-dissociated protein 1	CAND1
	1251	ENSG00000182718	0.265033	3.00659	2.41356	unchanged	P07355-2	Annexin A2	ANXA2
	1252	ENSG00000105372	0.265	2.53437	2.05994	unchanged	P39019;A0A075B6E2	40S ribosomal protein S19	RPS19
	1253	ENSG00000130479	0.264967	2.98412	2.39526	unchanged	Q66K74;Q66K74-2	Microtubule-associated protein 1S;MAP1S heavy chain;MAP1S light chain	MAP1S
	1254	ENSG00000171853	0.264933	2.82499	2.27937	unchanged	Q8WVT3	Trafficking protein particle complex subunit 12	TRAPPC12
	1255	ENSG00000067560	0.264833	2.55343	2.07393	unchanged	P61586;C9JX21;C9JNR4	Transforming protein RhoA	RHOA
	1256	ENSG00000232119	0.264767	2.22287	1.8204	unchanged	Q9ULC4;Q9ULC4-2;Q9ULC4-3	Malignant T-cell-amplified sequence 1	MCTS1
	1257	ENSG00000137411	0.264667	2.90337	2.33501	unchanged	Q5ST30;A0A140TA45;A0A140TA40;A0A0A0MTG1;A0A140T8Y0;A0A0G2JIA5;A0A140TA36;A0A140TA35;Q5ST30-4;B7ZL25;B4E0K6;A0A0G2JL52;Q5ST30-3	Valine--tRNA ligase, mitochondrial	VARS2
	1258	ENSG00000151502	0.2645	2.4898	2.02517	unchanged	Q4G0F5	Vacuolar protein sorting-associated protein 26B	VPS26B
	1259	ENSG00000087301	0.2645	3.08401	2.46825	unchanged	Q9P2K2;H0YJI6	Thioredoxin domain-containing protein 16	TXNDC16
	1260	ENSG00000103342	0.2644	3.27007	2.59998	unchanged	P15170-3;P15170-2;P15170;H3BR35;Q8IYD1	Eukaryotic peptide chain release factor GTP-binding subunit ERF3A;Eukaryotic peptide chain release factor GTP-binding subunit ERF3B	GSPT1;GSPT2
	1261	ENSG00000012061	0.264367	2.74948	2.22359	unchanged	P07992;P07992-3;K7EP14;K7EK97;K7ES46;K7ER60;K7ER89;P07992-4;P07992-2	DNA excision repair protein ERCC-1	ERCC1
	1262	ENSG00000132613	0.2637	1.63454	1.35247	unchanged	Q765P7;A0A087WXN9;Q765P7-2	MTSS1-like protein	MTSS1L
	1263	ENSG00000175175	0.2637	2.74953	2.22359	unchanged	Q8WY54	Protein phosphatase 1E	PPM1E
	1264	ENSG00000173757	0.2635	1.78922	1.47943	unchanged	P51692;P42229;K7EK35;P42229-2	Signal transducer and activator of transcription 5B;Signal transducer and activator of transcription 5A;Signal transducer and activator of transcription	STAT5B;STAT5A
	1265	ENSG00000182195	0.263467	2.19921	1.80099	unchanged	O95751	Protein LDOC1	LDOC1
	1266	ENSG00000162889	0.263433	2.71427	2.19662	unchanged	P49137;P49137-2	MAP kinase-activated protein kinase 2	MAPKAPK2
	1267	ENSG00000156976	0.263167	3.05492	2.44753	unchanged	Q14240;Q14240-2;E7EQG2	Eukaryotic initiation factor 4A-II;Eukaryotic initiation factor 4A-II, N-terminally processed	EIF4A2
	1268	ENSG00000013375	0.263133	2.28077	1.86662	unchanged	O95394;A0A494C0G1;H0Y987;O95394-4;O95394-3;A0A087WT27;A0A494C1Q4;J3KN95;A0A494C1E2	Phosphoacetylglucosamine mutase	PGM3
	1269	ENSG00000065000	0.262933	2.37102	1.9379	unchanged	O14617;O14617-5;O14617-4;O14617-2;O14617-3;A0A2R8Y611	AP-3 complex subunit delta-1	AP3D1
	1270	ENSG00000166974	0.262367	1.6922	1.40064	unchanged	Q15555;Q15555-4;Q15555-5;Q15555-3;Q15555-2;K7ERD8	Microtubule-associated protein RP/EB family member 2	MAPRE2
	1271	ENSG00000151414	0.262133	1.83062	1.51224	unchanged	Q8TDX7	Serine/threonine-protein kinase Nek7	NEK7
	1272	ENSG00000165219	0.261967	2.95524	2.3748	unchanged	Q14C86;Q14C86-6;Q14C86-5;Q14C86-4;Q14C86-2;Q14C86-3;F8W9S7;C9IZ08;B4DGD8	GTPase-activating protein and VPS9 domain-containing protein 1	GAPVD1
	1273	ENSG00000105058	0.261933	1.20424	1.00284	unchanged	Q9Y421;K7EIY1;K7ENN5;Q9Y421-2;K7ELZ8;Q9Y421-3	Protein FAM32A	FAM32A
	1274	ENSG00000162434	0.2616	2.75111	2.22446	unchanged	P23458;A0A5F9ZH07;A0A5F9ZHN8;A0A5F9ZI39;A0A5F9ZHW0	Tyrosine-protein kinase JAK1	JAK1
	1275	ENSG00000131236	0.261567	3.15911	2.52003	unchanged	Q01518	Adenylyl cyclase-associated protein 1	CAP1
	1276	ENSG00000179295	0.2614	3.08327	2.46825	unchanged	Q06124-1;Q06124;Q06124-3	Tyrosine-protein phosphatase non-receptor type 11	PTPN11
	1277	ENSG00000103061	0.261367	2.13117	1.74709	unchanged	Q96CW6;A0A087X0P9	Probable RNA polymerase II nuclear localization protein SLC7A6OS	SLC7A6OS
	1278	ENSG00000214114	0.261267	3.20238	2.55413	unchanged	Q99417;A0A087WV05	C-Myc-binding protein	MYCBP
	1279	ENSG00000116649	0.260867	2.15984	1.7693	unchanged	P19623	Spermidine synthase	SRM
	1280	ENSG00000143390	0.260833	1.58485	1.31459	unchanged	P48382;F8W689;P48382-2	DNA-binding protein RFX5	RFX5
	1281	ENSG00000197601	0.260767	3.20719	2.55674	unchanged	Q8WVX9;E9PNW8	Fatty acyl-CoA reductase 1	FAR1
	1282	ENSG00000165113	0.260267	1.91194	1.5756	unchanged	Q5VSY0;Q5VSY0-2	G kinase-anchoring protein 1	GKAP1
	1283	ENSG00000124571	0.260067	2.18427	1.78913	unchanged	Q9HAV4	Exportin-5	XPO5
	1284	ENSG00000170248	0.26	3.26293	2.59493	unchanged	Q8WUM4	Programmed cell death 6-interacting protein	PDCD6IP
	1285	ENSG00000135720	0.259667	2.69864	2.18395	unchanged	O43237;O43237-2;J3KRI4	Cytoplasmic dynein 1 light intermediate chain 2	DYNC1LI2
	1286	ENSG00000187231	0.259433	2.511	2.04255	unchanged	Q86VW0	SEC14 domain and spectrin repeat-containing protein 1	SESTD1
	1287	ENSG00000132842	0.2593	2.63225	2.13401	unchanged	O00203;O00203-3	AP-3 complex subunit beta-1	AP3B1
	1288	ENSG00000131238	0.258933	2.27778	1.86447	unchanged	P50897;A0A2C9F2P4;A0A286YFF7;Q5T0S4;A0A286YFE3;A0A286YFL8;P50897-2	Palmitoyl-protein thioesterase 1	PPT1
	1289	ENSG00000153113	0.258867	2.69476	2.1811	unchanged	P20810-6;A0A0C4DGB5;P20810-7;P20810-10;P20810-9;P20810-5;P20810-8;B7Z574;P20810-4;P20810;E7EVY3;E7ES10;E9PDE4;P20810-2;E9PCH5;P20810-3;H0Y7F0;E7EQ12;H0Y9H6;E7EQA0;A0A0A0MR45;H0YD33	Calpastatin	CAST
	1290	ENSG00000149600	0.258733	2.80812	2.26664	unchanged	Q86VX2;A0A2R8Y620;A0A2R8Y7U2;A0A2R8Y600;A0A2R8Y455;Q86VX2-2;V9GY66	COMM domain-containing protein 7	COMMD7
	1291	ENSG00000164576	0.2585	2.15319	1.76444	unchanged	Q9HAJ7;Q9HAJ7-2;Q9HAJ7-3	Histone deacetylase complex subunit SAP30L	SAP30L
	1292	ENSG00000117308	0.2584	1.96853	1.61992	unchanged	Q14376;Q5QPP9;Q5QPP4;Q14376-2;Q5QPP3	UDP-glucose 4-epimerase	GALE
	1293	ENSG00000100726	0.258333	2.88384	2.32169	unchanged	Q9Y4R8;H3BRS3	Telomere length regulation protein TEL2 homolog	TELO2
	1294	ENSG00000137177	0.258133	1.64843	1.36455	unchanged	Q9H1H9-3;Q9H1H9-4;Q9H1H9;Q9H1H9-2;A0A1B0GUA8	Kinesin-like protein KIF13A	KIF13A
	1295	ENSG00000137055	0.258	3.02458	2.42555	unchanged	Q9Y263;E5RIM3	Phospholipase A-2-activating protein	PLAA
	1296	ENSG00000103994	0.257967	3.29189	2.61569	unchanged	Q9H2Y7;H3BSS6;A0A0C4DGM5;Q9H2Y7-2;H3BNX5	Zinc finger protein 106	ZNF106
	1297	ENSG00000083799	0.257767	1.56086	1.29602	unchanged	Q9NQC7;J3KRR7;Q9NQC7-2;H3BS09	Ubiquitin carboxyl-terminal hydrolase CYLD	CYLD
	1298	ENSG00000149930	0.257667	3.24177	2.58081	unchanged	Q9UL54-2;Q9UL54;Q9UL54-4;Q9UL54-3	Serine/threonine-protein kinase TAO2	TAOK2
	1299	ENSG00000103047	0.257533	2.64783	2.14567	unchanged	Q9C0B7	Transport and Golgi organization protein 6 homolog	TANGO6
	1300	ENSG00000129422	0.257433	1.6899	1.39878	unchanged	Q9ULD2-2;Q9ULD2;Q9ULD2-6;Q9ULD2-7;Q9ULD2-3;Q9ULD2-4	Microtubule-associated tumor suppressor 1	MTUS1
	1301	ENSG00000105669	0.257167	1.7854	1.4764	unchanged	O14579;M0QXB4;O14579-2;O14579-3;M0R061	Coatomer subunit epsilon	COPE
	1302	ENSG00000092036	0.256933	2.2971	1.88031	unchanged	Q9H6D7;Q9H6D7-4;Q9H6D7-3;G3V541;Q9H6D7-2;G3V2T6	HAUS augmin-like complex subunit 4	HAUS4
	1303	ENSG00000175073	0.2566	2.08746	1.71534	unchanged	Q96JH7	Deubiquitinating protein VCIP135	VCPIP1
	1304	ENSG00000101557	0.256567	2.02908	1.66932	unchanged	P54578;A6NJA2;P54578-2;P54578-3	Ubiquitin carboxyl-terminal hydrolase 14;Ubiquitin carboxyl-terminal hydrolase	USP14
	1305	ENSG00000011454	0.2563	2.80874	2.26667	unchanged	Q9Y3P9;Q9Y3P9-2	Rab GTPase-activating protein 1	RABGAP1
	1306	ENSG00000184983	0.256133	2.54529	2.06732	unchanged	P56556;A0A2Y9D025	NADH dehydrogenase [ubiquinone] 1 alpha subcomplex subunit 6	NDUFA6
	1307	ENSG00000186575	0.2561	3.15636	2.51801	unchanged	P35240;P35240-4;P35240-6;P35240-5;P35240-8;P35240-3;P35240-2;A0A5K1VW66	Merlin	NF2
	1308	ENSG00000110060	0.255867	2.12189	1.74067	unchanged	Q9BZE2	tRNA pseudouridine(38/39) synthase	PUS3
	1309	ENSG00000164045	0.255767	1.2491	1.03928	unchanged	P30304;P30304-2	M-phase inducer phosphatase 1	CDC25A
	1310	ENSG00000110025	0.255767	1.86382	1.53763	unchanged	Q9NRS6;E9PK26;E9PMW6;Q9NRS6-2	Sorting nexin-15	SNX15
	1311	ENSG00000066583	0.255433	3.12235	2.49648	unchanged	Q96CN7;D6RGE2	Isochorismatase domain-containing protein 1	ISOC1
	1312	ENSG00000163818	0.255367	1.88351	1.553	unchanged	Q9NQ48;Q9NQ48-2;H7C488;Q9NQ48-3	Leucine zipper transcription factor-like protein 1	LZTFL1
	1313	ENSG00000196531	0.255333	2.36141	1.93057	unchanged	E9PAV3;F8VZJ2;H0YHX9;Q13765;E9PAV3-2;F8W0W4;F8W1N5;F8VNW4	Nascent polypeptide-associated complex subunit alpha, muscle-specific form;Nascent polypeptide-associated complex subunit alpha	NACA
	1314	ENSG00000129680	0.255333	2.60253	2.11097	unchanged	Q8IWC1;Q8IWC1-3;Q8IWC1-2;Q8IWC1-4;A0A0A0MRP0	MAP7 domain-containing protein 3	MAP7D3
	1315	ENSG00000186184	0.255267	2.90421	2.33543	unchanged	A0A0R4J2F3;P0DPB6	NA	NA
	1316	ENSG00000183963	0.255233	2.19979	1.80128	unchanged	P53814;P53814-5;A0A087WVP4;A0A087X1R1;P53814-6	Smoothelin	SMTN
	1317	ENSG00000120526	0.255067	2.90357	2.33501	unchanged	Q96RS6;Q96RS6-2;Q96RS6-3	NudC domain-containing protein 1	NUDCD1
	1318	ENSG00000099940	0.254933	2.78014	2.247	unchanged	O95721;C9JAF7	Synaptosomal-associated protein 29;Synaptosomal-associated protein	SNAP29
	1319	ENSG00000169372	0.2549	1.36225	1.13301	unchanged	P78560;F8VV49;F5H7C2;F8VVY5;P78560-2	Death domain-containing protein CRADD	CRADD
	1320	ENSG00000128159	0.254467	2.5402	2.06426	unchanged	Q96RT7;E7EQL8;Q96RT7-2;Q96RT7-3	Gamma-tubulin complex component 6	TUBGCP6
	1321	ENSG00000106477	0.254333	2.08904	1.71614	unchanged	Q9BYV8;Q9BYV8-2;Q9BYV8-5	Centrosomal protein of 41 kDa	CEP41
	1322	ENSG00000155115	0.254	1.55645	1.29286	unchanged	Q969F1	General transcription factor 3C polypeptide 6	GTF3C6
	1323	ENSG00000123159	0.254	2.63841	2.13839	unchanged	O14908;O14908-2;K7EM11	PDZ domain-containing protein GIPC1	GIPC1
	1324	ENSG00000129515	0.2539	2.16326	1.77175	unchanged	Q9UNH7;A0A0A0MRI2;Q9UNH7-2;G3V5X9	Sorting nexin-6;Sorting nexin-6, N-terminally processed	SNX6
	1325	ENSG00000178502	0.253867	2.62995	2.13224	unchanged	Q9NVR0	Kelch-like protein 11	KLHL11
	1326	ENSG00000133265	0.253833	2.57928	2.09362	unchanged	Q9NZL4;Q9NZL4-3;Q9NZL4-2;K7EL16	Hsp70-binding protein 1	HSPBP1
	1327	ENSG00000115233	0.253633	3.22056	2.56548	unchanged	O00487	26S proteasome non-ATPase regulatory subunit 14	PSMD14
	1328	ENSG00000134324	0.253533	2.57384	2.09008	unchanged	Q14693;Q14693-3;Q14693-5;Q14693-2;Q14693-4;Q14693-7	Phosphatidate phosphatase LPIN1	LPIN1
	1329	ENSG00000134058	0.2535	2.92974	2.35557	unchanged	P50613;D6RAD4;D6R9G1	Cyclin-dependent kinase 7	CDK7
	1330	ENSG00000198142	0.2535	3.18783	2.54282	unchanged	Q53LP3	Ankyrin repeat domain-containing protein SOWAHC	SOWAHC
	1331	ENSG00000155545	0.253067	2.96792	2.38344	unchanged	Q7Z3K6;Q7Z3K6-3;Q7Z3K6-2;Q7Z3K6-4;A8MQD4	Mesoderm induction early response protein 3	MIER3
	1332	ENSG00000176095	0.2529	1.95104	1.60533	unchanged	Q92551;Q92551-2;C9JNA8	Inositol hexakisphosphate kinase 1	IP6K1
	1333	ENSG00000204611	0.252733	2.43662	1.9862	unchanged	Q08AN1	Zinc finger protein 616	ZNF616
	1334	ENSG00000163798	0.252333	3.18851	2.54325	unchanged	A0A087X0M4;Q9BWU0	Kanadaptin	SLC4A1AP
	1335	ENSG00000100580	0.251667	2.0203	1.66126	unchanged	Q6PL24	Protein TMED8	TMED8
	1336	ENSG00000142327	0.251567	1.3227	1.10001	unchanged	Q9HAU8;H7C200	Arginyl aminopeptidase-like 1	RNPEPL1
	1337	ENSG00000172809	0.2515	2.92804	2.35422	unchanged	P63173;J3KT73;J3QL01	60S ribosomal protein L38	RPL38
	1338	ENSG00000102780	0.2514	2.31198	1.8918	unchanged	Q86XP1;Q86XP1-2;A0A0D9SFR6;Q86XP1-5;Q86XP1-3	Diacylglycerol kinase eta	DGKH
	1339	ENSG00000115756	0.251367	3.25386	2.58796	unchanged	P37235;E9PC71;P84074	Hippocalcin-like protein 1;Neuron-specific calcium-binding protein hippocalcin	HPCAL1;HPCA
	1340	ENSG00000180957	0.251333	2.1347	1.74957	unchanged	P48739;P48739-2;P48739-3;A0A0A0MSW4;B3KYB6;B3KYB7	Phosphatidylinositol transfer protein beta isoform	PITPNB
	1341	ENSG00000110048	0.2512	3.00395	2.41158	unchanged	P22059	Oxysterol-binding protein 1	OSBP
	1342	ENSG00000151229	0.251133	2.18185	1.78699	unchanged	Q96QE2;E9PE47	Proton myo-inositol cotransporter	SLC2A13
	1343	ENSG00000103148	0.251067	1.79991	1.48816	unchanged	Q12980;B7Z6Q0	Nitrogen permease regulator 3-like protein	NPRL3
	1344	ENSG00000065802	0.251	1.73775	1.43788	unchanged	Q9Y576;B9A047	Ankyrin repeat and SOCS box protein 1	ASB1
	1345	ENSG00000071553	0.250967	3.03992	2.43639	unchanged	Q15904;A0A0C4DGX8;A6QRJ1	V-type proton ATPase subunit S1	ATP6AP1
	1346	ENSG00000158301	0.2509	2.46482	2.00687	unchanged	Q96D09	G-protein coupled receptor-associated sorting protein 2	GPRASP2
	1347	ENSG00000108828	0.2509	2.98584	2.39633	unchanged	Q99536;Q99536-3;Q99536-2	Synaptic vesicle membrane protein VAT-1 homolog	VAT1
	1348	ENSG00000132793	0.250833	1.9267	1.58656	unchanged	Q9BQK8;Q9BQK8-2	Phosphatidate phosphatase LPIN3	LPIN3
	1349	ENSG00000157538	0.2507	2.58984	2.10072	unchanged	O14972;A8MTY9;O14972-2;A8MY26	Down syndrome critical region protein 3	DSCR3
	1350	ENSG00000176894	0.2506	1.81103	1.49661	unchanged	Q9NR77;F5H4N4	Peroxisomal membrane protein 2	PXMP2
	1351	ENSG00000138835	0.250567	1.90296	1.56901	unchanged	P49796;P49796-4;P49796-6;C9J582;P49796-1;P49796-9;P49796-5	Regulator of G-protein signaling 3	RGS3
	1352	ENSG00000060971	0.2503	2.16474	1.77309	unchanged	P09110;C9JDE9;H7C131;P09110-2	3-ketoacyl-CoA thiolase, peroxisomal	ACAA1
	1353	ENSG00000071994	0.250167	2.43783	1.9871	unchanged	Q16342;Q16342-3;F5H4V9	Programmed cell death protein 2	PDCD2
	1354	ENSG00000139505	0.2499	2.19952	1.80115	unchanged	Q9Y217;Q9Y217-2	Myotubularin-related protein 6	MTMR6
	1355	ENSG00000164008	0.249833	2.18074	1.78617	unchanged	Q9BV19	Uncharacterized protein C1orf50	C1orf50
	1356	ENSG00000140416	0.2497	1.569	1.30208	unchanged	H7BYY1;F5H7S3;B7Z596;P09493-2	Tropomyosin alpha-1 chain	TPM1
	1357	ENSG00000125971	0.249133	1.67952	1.39071	unchanged	Q9NP97;B1AKR6	Dynein light chain roadblock-type 1	DYNLRB1
	1358	ENSG00000157514	0.2489	2.38257	1.94592	unchanged	Q99576-3;Q99576;Q5JRJ0;E7EWD5;Q99576-4;Q5JRJ2	TSC22 domain family protein 3	TSC22D3
	1359	ENSG00000163931	0.248767	2.81734	2.27404	unchanged	P29401;P29401-2;A0A0B4J1R6	Transketolase	TKT
	1360	ENSG00000060237	0.2487	2.94967	2.37054	unchanged	Q9H4A3;Q9H4A3-5;F5GWT4;Q9H4A3-2;Q9H4A3-6;Q9H4A3-7;Q9H4A3-4	Serine/threonine-protein kinase WNK1	WNK1
	1361	ENSG00000165288	0.248367	3.03494	2.43276	unchanged	Q6RI45;Q6RI45-5;Q6RI45-2;Q6RI45-3;Q6RI45-4	Bromodomain and WD repeat-containing protein 3	BRWD3
	1362	ENSG00000089902	0.248267	3.14359	2.50965	unchanged	Q9UKL0	REST corepressor 1	RCOR1
	1363	ENSG00000187325	0.248233	2.80815	2.26664	unchanged	Q9HBM6	Transcription initiation factor TFIID subunit 9B	TAF9B
	1364	ENSG00000024048	0.248067	2.56134	2.08014	unchanged	Q8IWV8;Q8IWV8-4	E3 ubiquitin-protein ligase UBR2	UBR2
	1365	ENSG00000168806	0.247867	2.11937	1.73887	unchanged	O60294	tRNA wybutosine-synthesizing protein 4	LCMT2
	1366	ENSG00000100911	0.247667	1.77789	1.4707	unchanged	Q9UL46;A0A087X1Z3;H0YM70	Proteasome activator complex subunit 2	PSME2
	1367	ENSG00000105732	0.247467	2.96021	2.37786	unchanged	Q6ZN55;A0A0C4DFM2;Q6ZN55-2	Zinc finger protein 574	ZNF574
	1368	ENSG00000185813	0.247267	2.01628	1.65825	unchanged	Q99447;Q99447-3;Q99447-4;I3L1R7;Q99447-2;I3L3V9;I3L1L9	Ethanolamine-phosphate cytidylyltransferase	PCYT2
	1369	ENSG00000142208	0.247033	1.88059	1.55044	unchanged	P31749;P31749-2	RAC-alpha serine/threonine-protein kinase	AKT1
	1370	ENSG00000071794	0.246933	2.45181	1.9974	unchanged	Q14527;A0A0C4DGA6;Q14527-2	Helicase-like transcription factor	HLTF
	1371	ENSG00000134077	0.246833	2.68294	2.17337	unchanged	Q9BV44;H7C3J3	THUMP domain-containing protein 3	THUMPD3
	1372	ENSG00000166483	0.246733	3.05694	2.44837	unchanged	P30291;P30291-2	Wee1-like protein kinase	WEE1
	1373	ENSG00000113300	0.246433	2.24567	1.83891	unchanged	Q9ULM6	CCR4-NOT transcription complex subunit 6	CNOT6
	1374	ENSG00000153310	0.2463	1.52149	1.26446	unchanged	Q9NUQ9;Q9NUQ9-2;A0A1W2PRQ0	Protein FAM49B	FAM49B
	1375	ENSG00000083223	0.2463	2.86583	2.3098	unchanged	Q5VYS8;Q5VYS8-6;Q5VYS8-4;X6R3Q3	Terminal uridylyltransferase 7	ZCCHC6
	1376	ENSG00000198876	0.246267	2.49523	2.02912	unchanged	Q5T6F0;X6RL26;X6RBJ8	DDB1- and CUL4-associated factor 12	DCAF12
	1377	ENSG00000074590	0.246233	1.77786	1.4707	unchanged	O60285;F8VSH4	NUAK family SNF1-like kinase 1	NUAK1
	1378	ENSG00000256269	0.2462	2.18817	1.7922	unchanged	P08397;F5H345;A0A3B3IRR1;A0A3F2YNY7;P08397-2;P08397-4;P08397-3;F5GY90;F5H0P4;A0A3B3IU56;A0A1W2PNU5;A0A3B3IU34	Porphobilinogen deaminase	HMBS
	1379	ENSG00000157191	0.246033	3.09506	2.47635	unchanged	Q9NVZ3;F6SKB8;Q9NVZ3-3;Q9NVZ3-2;Q9NVZ3-4;D6RAN6;D6RB24	Adaptin ear-binding coat-associated protein 2	NECAP2
	1380	ENSG00000165175	0.245867	2.45453	1.99949	unchanged	Q9NPA3	Mid1-interacting protein 1	MID1IP1
	1381	ENSG00000112576	0.245567	2.74481	2.22042	unchanged	P30281;Q5T8J1;P30281-2;P30281-3	G1/S-specific cyclin-D3	CCND3
	1382	ENSG00000184056	0.2453	2.07236	1.70316	unchanged	Q9H267;A0A2R8YDQ0;F5H008;Q9H267-2	Vacuolar protein sorting-associated protein 33B	VPS33B
	1383	ENSG00000129911	0.2451	2.76037	2.23164	unchanged	Q9BXK1	Krueppel-like factor 16	KLF16
	1384	ENSG00000036054	0.244967	2.35859	1.92835	unchanged	Q9NUY8;Q9NUY8-2;E9PGE5	TBC1 domain family member 23	TBC1D23
	1385	ENSG00000135596	0.2446	2.03651	1.67514	unchanged	Q8TDZ2;Q8TDZ2-4;Q8TDZ2-2	Protein-methionine sulfoxide oxidase MICAL1	MICAL1
	1386	ENSG00000093009	0.244333	3.01297	2.41685	unchanged	O75419;O75419-2;O75419-3;A0A5F9ZH29;A0A5K1VW85;A0A5F9ZI22	Cell division control protein 45 homolog	CDC45
	1387	ENSG00000167881	0.244333	3.12356	2.49673	unchanged	Q9UHB9;Q9UHB9-4;Q9UHB9-2	Signal recognition particle subunit SRP68	SRP68
	1388	ENSG00000106615	0.2443	1.69807	1.40508	unchanged	Q15382;C9J931;C9J469	GTP-binding protein Rheb	RHEB
	1389	ENSG00000100462	0.244067	2.74608	2.22105	unchanged	O14744;O14744-5;O14744-2;O14744-3;O14744-4;H0YJX6	Protein arginine N-methyltransferase 5;Protein arginine N-methyltransferase 5, N-terminally processed	PRMT5
	1390	ENSG00000151491	0.244	3.18053	2.5375	unchanged	Q12929;A0A2R8Y4W2;A0A2R8YE63;Q12929-2	Epidermal growth factor receptor kinase substrate 8	EPS8
	1391	ENSG00000114480	0.243967	2.58125	2.09474	unchanged	Q04446;E9PGM4	1,4-alpha-glucan-branching enzyme	GBE1
	1392	ENSG00000152520	0.2438	2.52744	2.05486	unchanged	Q58A45-3;A0A0C4DFZ9	PAB-dependent poly(A)-specific ribonuclease subunit PAN3	PAN3
	1393	ENSG00000106608	0.243533	2.39703	1.95682	unchanged	Q8TCY9;Q8TCY9-2;Q8TCY9-4;Q8TCY9-3	Up-regulator of cell proliferation	URGCP
	1394	ENSG00000123416	0.243433	1.87618	1.54697	unchanged	P68363;P68363-2	Tubulin alpha-1B chain	TUBA1B
	1395	ENSG00000163719	0.2434	2.04787	1.68443	unchanged	Q8NCE2;Q8NCE2-3;Q8NCE2-2;B4DJ23	Myotubularin-related protein 14	MTMR14
	1396	ENSG00000080546	0.243033	1.37958	1.14709	unchanged	Q9Y6P5;Q9Y6P5-2;Q9Y6P5-3	Sestrin-1	SESN1
	1397	ENSG00000166575	0.2428	1.76974	1.4642	unchanged	Q86UB9;Q86UB9-2;E9PQL0	Transmembrane protein 135	TMEM135
	1398	ENSG00000137076	0.242767	2.95806	2.37631	unchanged	Q9Y490	Talin-1	TLN1
	1399	ENSG00000160741	0.242733	1.39874	1.16297	unchanged	Q53ET0;H0YDQ8	CREB-regulated transcription coactivator 2	CRTC2
	1400	ENSG00000185070	0.242733	1.62856	1.34806	unchanged	O43155	Leucine-rich repeat transmembrane protein FLRT2	FLRT2
	1401	ENSG00000134684	0.242667	2.34954	1.92097	unchanged	P54577;A0A0C4DGZ5	Tyrosine--tRNA ligase, cytoplasmic;Tyrosine--tRNA ligase, cytoplasmic, N-terminally processed;Tyrosine--tRNA ligase	YARS
	1402	ENSG00000182173	0.242533	2.12561	1.74355	unchanged	Q7Z6J9	tRNA-splicing endonuclease subunit Sen54	TSEN54
	1403	ENSG00000102893	0.242333	1.96174	1.61427	unchanged	Q93100-4;Q93100-3;Q93100;Q93100-2	Phosphorylase b kinase regulatory subunit beta	PHKB
	1404	ENSG00000159459	0.242133	2.54432	2.06652	unchanged	Q8IWV7;A0A087WTJ9	E3 ubiquitin-protein ligase UBR1	UBR1
	1405	ENSG00000165006	0.242033	2.2983	1.88086	unchanged	Q9NZ09;Q9NZ09-2;Q9NZ09-4;A0A0D9SG79;Q9NZ09-3	Ubiquitin-associated protein 1	UBAP1
	1406	ENSG00000186635	0.2419	2.60497	2.11306	unchanged	Q96P48;Q96P48-3;Q96P48-1;E7EU13;Q96P48-2;Q96P48-4;Q96P48-7;A0A0A0MSJ2;Q96P48-5	Arf-GAP with Rho-GAP domain, ANK repeat and PH domain-containing protein 1	ARAP1
	1407	ENSG00000131462	0.241833	1.89639	1.56382	unchanged	P23258;Q9NRH3;K7EIS0	Tubulin gamma-1 chain;Tubulin gamma-2 chain;Tubulin gamma chain	TUBG1;TUBG2
	1408	ENSG00000132341	0.2416	2.11917	1.73887	unchanged	P62826;B5MDF5;J3KQE5;F5H018;H0YFC6	GTP-binding nuclear protein Ran	RAN
	1409	ENSG00000153767	0.2416	2.78688	2.25201	unchanged	P29083	General transcription factor IIE subunit 1	GTF2E1
	1410	ENSG00000174276	0.241533	2.83486	2.28686	unchanged	Q9UHR6;E9PQB8	Zinc finger HIT domain-containing protein 2	ZNHIT2
	1411	ENSG00000137221	0.241267	1.99546	1.6409	unchanged	Q5JTD0;Q5JTD0-2;E2QRK7;Q5JTD0-4;H0Y4D6	Tight junction-associated protein 1	TJAP1
	1412	ENSG00000143164	0.241267	2.63074	2.13268	unchanged	Q58WW2-2;Q58WW2-4;Q58WW2-3;Q58WW2	DDB1- and CUL4-associated factor 6	DCAF6
	1413	ENSG00000175634	0.2409	2.90639	2.3374	unchanged	Q9UBS0	Ribosomal protein S6 kinase beta-2	RPS6KB2
	1414	ENSG00000205629	0.240767	3.28874	2.61334	unchanged	Q9UIC8;Q9UIC8-3;Q9UIC8-2	Leucine carboxyl methyltransferase 1	LCMT1
	1415	ENSG00000163032	0.240633	2.78866	2.25321	unchanged	P62760;E7ER47	Visinin-like protein 1	VSNL1
	1416	ENSG00000178096	0.2405	3.21017	2.5584	unchanged	Q9Y3E2	BolA-like protein 1	BOLA1
	1417	ENSG00000145919	0.240333	1.78021	1.47249	unchanged	Q96IK1;H7C5I4	Biorientation of chromosomes in cell division protein 1	BOD1
	1418	ENSG00000100982	0.240267	3.1895	2.54374	unchanged	Q9H4Z3	Phosphorylated CTD-interacting factor 1	PCIF1
	1419	ENSG00000150867	0.239967	2.57626	2.09216	unchanged	P48426;P48426-2;H7BXS3	Phosphatidylinositol 5-phosphate 4-kinase type-2 alpha	PIP4K2A
	1420	ENSG00000183576	0.239733	2.796	2.25772	unchanged	Q86TU7;Q6NXR6;Q86TU7-3;Q86TU7-2	Histone-lysine N-methyltransferase setd3	SETD3
	1421	ENSG00000070495	0.239533	2.36721	1.93515	unchanged	Q6NYC1;Q6NYC1-3;B2WTI3;B2WTI4;K7EJU9;Q6NYC1-2	Bifunctional arginine demethylase and lysyl-hydroxylase JMJD6	JMJD6
	1422	ENSG00000068097	0.2395	2.32445	1.90099	unchanged	Q6AI08;A0A087WXZ7;K7EIX2	HEAT repeat-containing protein 6	HEATR6
	1423	ENSG00000101421	0.239467	1.32769	1.10434	unchanged	Q9H444	Charged multivesicular body protein 4b	CHMP4B
	1424	ENSG00000113810	0.239467	2.24376	1.83728	unchanged	Q9NTJ3;E9PD53;Q9NTJ3-2	Structural maintenance of chromosomes protein 4;Structural maintenance of chromosomes protein	SMC4
	1425	ENSG00000165264	0.239433	2.41024	1.96676	unchanged	O95139;A0A087WZX2;O95139-2	NADH dehydrogenase [ubiquinone] 1 beta subcomplex subunit 6	NDUFB6
	1426	ENSG00000159082	0.2394	1.71507	1.41897	unchanged	O43426;A0A0D9SGJ6;J3KQV8;O43426-4;J3KPK1;C9JFZ1;O43426-2	Synaptojanin-1	SYNJ1
	1427	ENSG00000131778	0.2392	2.216	1.81495	unchanged	Q86WJ1;Q86WJ1-2;Q86WJ1-4;A0A0A0MSH9;A0A494C1F7;A0A0A0MRH8;Q86WJ1-3;A0A494C1P7;Q86WJ1-5;A0A494C179	Chromodomain-helicase-DNA-binding protein 1-like	CHD1L
	1428	ENSG00000121579	0.2391	2.3255	1.90189	unchanged	Q9GZZ1;E7EQ69;C9J5D1;Q9GZZ1-2;A0A087WWJ2	N-alpha-acetyltransferase 50	NAA50
	1429	ENSG00000113597	0.239067	2.06781	1.70019	unchanged	A5PLN9;A5PLN9-2;A5PLN9-4;A5PLN9-5;A5PLN9-7;D6RB83	Trafficking protein particle complex subunit 13	TRAPPC13
	1430	ENSG00000172613	0.239067	2.62526	2.12931	unchanged	Q99638;F5H492;F5H4F1;F5H8A2	Cell cycle checkpoint control protein RAD9A	RAD9A
	1431	ENSG00000166130	0.239	1.66125	1.37524	unchanged	Q70UQ0;Q70UQ0-2	Inhibitor of nuclear factor kappa-B kinase-interacting protein	IKBIP
	1432	ENSG00000048392	0.2389	1.90382	1.56956	unchanged	Q7LG56;Q7LG56-6;H0YAV1;A0A0C4DGZ6;Q7LG56-2	Ribonucleoside-diphosphate reductase subunit M2 B	RRM2B
	1433	ENSG00000044446	0.2387	1.76194	1.45797	unchanged	P46019	Phosphorylase b kinase regulatory subunit alpha, liver isoform	PHKA2
	1434	ENSG00000197535	0.2387	2.95757	2.37608	unchanged	G3V394;Q9Y4I1-3;Q9Y4I1;A0A087WY00;F8WE88;F8W6H6;Q9Y4I1-2	Unconventional myosin-Va	MYO5A
	1435	ENSG00000141577	0.238567	3.23381	2.57489	unchanged	Q9UPN4;Q9UPN4-2;I3L2J8;Q9UPN4-3	Centrosomal protein of 131 kDa	CEP131
	1436	ENSG00000091436	0.2384	2.79345	2.25664	unchanged	Q9NYL2	Mitogen-activated protein kinase kinase kinase MLT	ZAK
	1437	ENSG00000142541	0.238267	1.89779	1.56486	unchanged	P40429;M0QYS1;Q8J015;Q6NVV1	60S ribosomal protein L13a;Putative 60S ribosomal protein L13a protein RPL13AP3	RPL13A;RPL13a;RPL13AP3
	1438	ENSG00000157483	0.238033	2.8206	2.27636	unchanged	Q12965	Unconventional myosin-Ie	MYO1E
	1439	ENSG00000172167	0.238033	2.91769	2.34661	unchanged	Q96DY7	Mdm2-binding protein	MTBP
	1440	ENSG00000169764	0.237967	2.11876	1.73875	unchanged	Q16851;A0A087WYS1;E7EUC7;Q16851-2	UTP--glucose-1-phosphate uridylyltransferase	UGP2
	1441	ENSG00000092140	0.237967	2.92083	2.34877	unchanged	Q7L622;F5GX24;G3V483	G2/M phase-specific E3 ubiquitin-protein ligase	G2E3
	1442	ENSG00000088833	0.237867	1.58748	1.31658	unchanged	Q9UNZ2;Q9UNZ2-5;Q9UNZ2-4;F2Z2K0;Q9UNZ2-6	NSFL1 cofactor p47	NSFL1C
	1443	ENSG00000074935	0.237833	2.34443	1.91677	unchanged	Q9UJT0	Tubulin epsilon chain	TUBE1
	1444	ENSG00000014216	0.2378	1.98294	1.63093	unchanged	P07384	Calpain-1 catalytic subunit	CAPN1
	1445	ENSG00000140575	0.2378	2.50974	2.04165	unchanged	P46940;A0A0J9YXZ5;H0YLE8	Ras GTPase-activating-like protein IQGAP1	IQGAP1
	1446	ENSG00000164144	0.237333	1.93845	1.59608	unchanged	P53367-2	Arfaptin-1	ARFIP1
	1447	ENSG00000069011	0.2373	2.87505	2.31555	unchanged	P78337;D6R955;D6R9U1	Pituitary homeobox 1	PITX1
	1448	ENSG00000120705	0.236767	2.19199	1.79489	unchanged	P62495;B7Z7P8;P62495-2	Eukaryotic peptide chain release factor subunit 1	ETF1
	1449	ENSG00000170892	0.236767	2.55053	2.07188	unchanged	Q9BSV6;B0V3J0;A9C4B9;A0A0G2JNL0;A0A0G2JNK5;A0A590UJ73;A0A590UJW4;E7EQB3;A0A590UK37	tRNA-splicing endonuclease subunit Sen34	TSEN34
	1450	ENSG00000087191	0.236633	2.76006	2.23158	unchanged	P62195;P62195-2;J3QQM1;J3QSA9;J3QLH6;J3KRP2	26S protease regulatory subunit 8	PSMC5
	1451	ENSG00000116132	0.236567	1.60562	1.33029	unchanged	P54821;Q99811;G3V2N3;P54821-2	Paired mesoderm homeobox protein 1;Paired mesoderm homeobox protein 2	PRRX1;PRRX2
	1452	ENSG00000157870	0.236567	2.43203	1.98352	unchanged	Q8TBF2;A0A0A0MRV4;J3KPF5;A0A2P0CTB1;J3KPF6;A0A0G2JRR6;A0A0G2JSF1;A0A0A0MT35;A0A2P0CU24;Q8TBF2-7;A0A2P0CTH9;Q8TBF2-3;Q8TBF2-4;J3KRV9;J3QKK8;Q8TBF2-2;Q8TBF2-6	Prostamide/prostaglandin F synthase	FAM213B
	1453	ENSG00000204673	0.236467	2.30316	1.88445	unchanged	Q96B36;Q96B36-3;Q96B36-2	Proline-rich AKT1 substrate 1	AKT1S1
	1454	ENSG00000101052	0.236267	1.59141	1.32031	unchanged	Q9Y366	Intraflagellar transport protein 52 homolog	IFT52
	1455	ENSG00000106400	0.236	2.66705	2.1616	unchanged	O43257	Zinc finger HIT domain-containing protein 1	ZNHIT1
	1456	ENSG00000185104	0.235967	1.97138	1.62221	unchanged	Q9UNN5;Q9UNN5-2;B1ANM7;B3KT28	FAS-associated factor 1	FAF1
	1457	ENSG00000108666	0.235967	2.95801	2.37631	unchanged	Q9HAS0;J9JIC5;J3KRR1	Protein Njmu-R1	C17orf75
	1458	ENSG00000127947	0.235867	1.60759	1.33162	unchanged	Q05209;Q05209-2;Q05209-3	Tyrosine-protein phosphatase non-receptor type 12	PTPN12
	1459	ENSG00000114861	0.235867	2.86297	2.30734	unchanged	Q9H334;G5E965;A0A5H1ZRR8;A0A3B3IST0;A0A3B3IST6;A0A3B3IT66;H0Y882;A0A0B4J2F3;A0A3B3IS87;Q9H334-3;Q9H334-6;Q9H334-4;A0A3B3IT14;C9J0F0;Q9H334-7;A0A3B3IUB6;A0A3B3IRS5;A0A3B3IS20;A0A3B3IRW5;Q9H334-8;A0A3B3ISQ6	Forkhead box protein P1	FOXP1
	1460	ENSG00000068878	0.235767	2.33611	1.91031	unchanged	Q14997;Q14997-2;Q14997-3	Proteasome activator complex subunit 4	PSME4
	1461	ENSG00000110931	0.235267	2.52502	2.05344	unchanged	Q96RR4-3;Q96RR4-5;Q96RR4;Q96RR4-6;Q96RR4-2;Q96RR4-4;Q96RR4-7;F5GZ00	Calcium/calmodulin-dependent protein kinase kinase 2	CAMKK2
	1462	ENSG00000120437	0.2352	2.82089	2.27646	unchanged	Q9BWD1;Q9BWD1-2	Acetyl-CoA acetyltransferase, cytosolic	ACAT2
	1463	ENSG00000184203	0.235167	2.44394	1.99146	unchanged	P41236;E7EMN6;Q6NXS1	Protein phosphatase inhibitor 2;Protein phosphatase inhibitor 2-like protein 3	PPP1R2;PPP1R2P3
	1464	ENSG00000139437	0.234333	2.46336	2.00558	unchanged	Q9BT92;F5GWH6	Trichoplein keratin filament-binding protein	TCHP
	1465	ENSG00000213190	0.234133	2.39587	1.95611	unchanged	Q13015	Protein AF1q	MLLT11
	1466	ENSG00000184207	0.234033	1.53465	1.27516	unchanged	A6NDG6	Phosphoglycolate phosphatase	PGP
	1467	ENSG00000129696	0.234033	2.88284	2.3213	unchanged	Q6NXR4;E5RIH5	TELO2-interacting protein 2	TTI2
	1468	ENSG00000179403	0.233767	1.74873	1.44679	unchanged	Q6PCB0;J3QLP3	von Willebrand factor A domain-containing protein 1	VWA1
	1469	ENSG00000196498	0.233767	2.97848	2.39115	unchanged	C9JE98;C9J0Q5;Q9Y618;Q9Y618-5;Q9Y618-4;C9J7T7;A0A384DVL6;C9JQE8	Nuclear receptor corepressor 2	NCOR2
	1470	ENSG00000115421	0.233467	3.08426	2.46825	unchanged	Q9BWT3;Q9BWT3-2	Poly(A) polymerase gamma	PAPOLG
	1471	ENSG00000097046	0.233433	2.32114	1.89873	unchanged	O00311	Cell division cycle 7-related protein kinase	CDC7
	1472	ENSG00000151131	0.233333	1.95719	1.61046	unchanged	Q8N5I9	Uncharacterized protein C12orf45	C12orf45
	1473	ENSG00000136448	0.233167	2.07762	1.70697	unchanged	P30419;P30419-2	Glycylpeptide N-tetradecanoyltransferase 1	NMT1
	1474	ENSG00000067113	0.233133	1.60268	1.32841	unchanged	O14494;O14494-2	Lipid phosphate phosphohydrolase 1	PPAP2A
	1475	ENSG00000197312	0.233	2.47313	2.01275	unchanged	Q5TDH0;Q5TDH0-3;Q5TDH0-2;H0YII4;H0YI90	Protein DDI1 homolog 2	DDI2
	1476	ENSG00000170604	0.2329	2.49288	2.02721	unchanged	Q8IU81	Interferon regulatory factor 2-binding protein 1	IRF2BP1
	1477	ENSG00000020577	0.232667	1.44031	1.19562	unchanged	Q9UPU9;Q9UPU9-3;G3V2R1;Q9UPU9-2	Protein Smaug homolog 1	SAMD4A
	1478	ENSG00000071462	0.2326	2.73664	2.21414	unchanged	O43709;O43709-3	Probable 18S rRNA (guanine-N(7))-methyltransferase	WBSCR22
	1479	ENSG00000050748	0.232433	2.10396	1.72731	unchanged	P45984;P45984-2;P45984-5;P45984-3;D7R525;J3KNK1;P45984-4;E5RJ57	Mitogen-activated protein kinase 9	MAPK9
	1480	ENSG00000163870	0.232433	2.69406	2.18084	unchanged	Q86W33;C9JZ00;C9JU06;F8WC44;Q86W33-2;Q86W33-3	Transmembrane protein adipocyte-associated 1	TPRA1
	1481	ENSG00000105656	0.232267	2.34242	1.91506	unchanged	P55199;U3KQ90	RNA polymerase II elongation factor ELL	ELL
	1482	ENSG00000243156	0.232233	2.93479	2.35885	unchanged	Q7RTP6;Q7RTP6-2;A0A5F9ZHV5;Q7RTP6-3;Q7RTP6-4;Q7RTP6-5	Protein-methionine sulfoxide oxidase MICAL3	MICAL3
	1483	ENSG00000101407	0.232133	2.68953	2.17774	unchanged	O43156	TELO2-interacting protein 1 homolog	TTI1
	1484	ENSG00000094631	0.2321	2.48648	2.02267	unchanged	Q9UBN7;A0A2R8YDE6;Q9UBN7-2;A6NDI8	Histone deacetylase 6	HDAC6
	1485	ENSG00000105486	0.232067	1.94327	1.60004	unchanged	P18858;P18858-3;M0R0Q7;P18858-2;F5GZ28	DNA ligase 1;DNA ligase	LIG1
	1486	ENSG00000008294	0.232067	2.56116	2.08014	unchanged	O60271;O60271-2;A0A087X2D8;O60271-4;O60271-9;O60271-3;O60271-5	C-Jun-amino-terminal kinase-interacting protein 4	SPAG9
	1487	ENSG00000073712	0.232	2.55697	2.07714	unchanged	Q96AC1;Q96AC1-3;Q96AC1-2;H0YJ34;A0A0U1RRM8	Fermitin family homolog 2	FERMT2
	1488	ENSG00000196470	0.231967	2.561	2.08014	unchanged	Q8IUQ4;Q8IUQ4-2;Q8IUQ4-3	E3 ubiquitin-protein ligase SIAH1	SIAH1
	1489	ENSG00000076513	0.231867	1.94327	1.60004	unchanged	Q8IZ07;S4R3D2	Ankyrin repeat domain-containing protein 13A	ANKRD13A
	1490	ENSG00000122008	0.231433	1.71091	1.41559	unchanged	Q9UBT6;Q9UBT6-3;D6R9M8;Q9UBT6-6;Q9UBT6-2;Q9UBT6-5;D6RAI7;D6RDX9;D6RAE5;Q9UBT6-8	DNA polymerase kappa	POLK
	1491	ENSG00000178896	0.231033	2.596	2.10551	unchanged	Q9NPD3;E9PI41	Exosome complex component RRP41	EXOSC4
	1492	ENSG00000065548	0.230867	2.78475	2.25103	unchanged	Q8WU90	Zinc finger CCCH domain-containing protein 15	ZC3H15
	1493	ENSG00000142544	0.2308	2.4945	2.02855	unchanged	Q7Z7A3	Cytoplasmic tRNA 2-thiolation protein 1	CTU1
	1494	ENSG00000048828	0.230767	2.72846	2.20765	unchanged	Q9NZB2;Q9NZB2-6;Q9NZB2-4;A0A0C4DG79	Constitutive coactivator of PPAR-gamma-like protein 1	FAM120A
	1495	ENSG00000119669	0.230733	2.28201	1.86727	unchanged	Q9H1B7	Interferon regulatory factor 2-binding protein-like	IRF2BPL
	1496	ENSG00000144036	0.230567	2.64675	2.14531	unchanged	Q9Y2D4;A0A0U1RRB6;J3QT38;Q9Y2D4-2	Exocyst complex component 6B	EXOC6B
	1497	ENSG00000128585	0.230567	2.71394	2.19647	unchanged	Q9UL63	Muskelin	MKLN1
	1498	ENSG00000132478	0.229667	2.09771	1.72293	unchanged	Q9C0B0	RING finger protein unkempt homolog	UNK
	1499	ENSG00000160877	0.229533	1.9721	1.62274	unchanged	Q96RE7	Nucleus accumbens-associated protein 1	NACC1
	1500	ENSG00000136273	0.229533	2.03691	1.67542	unchanged	O60921;O60921-2	Checkpoint protein HUS1	HUS1
	1501	ENSG00000133313	0.2295	1.56537	1.29908	unchanged	Q96KP4;Q96KP4-2	Cytosolic non-specific dipeptidase	CNDP2
	1502	ENSG00000109917	0.229367	1.90551	1.57088	unchanged	O75312;H7C0E5;H7BZM7	Zinc finger protein ZPR1	ZPR1
	1503	ENSG00000173852	0.228567	2.23156	1.82789	unchanged	A0A1B0GW05;Q2PZI1	Probable C-mannosyltransferase DPY19L1	DPY19L1
	1504	ENSG00000158290	0.228433	1.58439	1.31433	unchanged	Q13620-1;Q13620;K4DI93;Q13620-3	Cullin-4B	CUL4B
	1505	ENSG00000113971	0.228433	2.52136	2.05054	unchanged	Q7Z494;Q7Z494-2	Nephrocystin-3	NPHP3
	1506	ENSG00000111802	0.228233	1.93124	1.58999	unchanged	O95551;O95551-2;O95551-3	Tyrosyl-DNA phosphodiesterase 2	TDP2
	1507	ENSG00000079432	0.228	1.86735	1.53997	unchanged	Q96RK0;A0A0A0MQR4;I3L2J0	Protein capicua homolog	CIC
	1508	ENSG00000120539	0.227633	1.75619	1.45316	unchanged	Q96GX5;Q96GX5-2;Q96GX5-3;A0A087WUU7	Serine/threonine-protein kinase greatwall	MASTL
	1509	ENSG00000162729	0.2276	2.82246	2.27764	unchanged	Q969P0;Q969P0-3;C9J8Z4	Immunoglobulin superfamily member 8	IGSF8
	1510	ENSG00000057608	0.2275	2.02766	1.66811	unchanged	P50395;P50395-2	Rab GDP dissociation inhibitor beta	GDI2
	1511	ENSG00000149091	0.2273	1.77073	1.46505	unchanged	Q13574;E9PNL8;Q13574-6;Q13574-2;Q13574-4;Q13574-7;Q13574-5;Q13574-3	Diacylglycerol kinase zeta;Diacylglycerol kinase	DGKZ
	1512	ENSG00000123562	0.2273	2.71679	2.1982	unchanged	Q15014;Q5JXX2;A0A0A0MT59;Q5JXX1	Mortality factor 4-like protein 2	MORF4L2
	1513	ENSG00000152518	0.226967	2.37664	1.94245	unchanged	P47974	Zinc finger protein 36, C3H1 type-like 2	ZFP36L2
	1514	ENSG00000284057	0.2266	2.05079	1.68644	unchanged	A0A1W2PRB8	NA	NA
	1515	ENSG00000106993	0.226567	1.27853	1.06302	unchanged	Q7L3B6;B1AL69	Hsp90 co-chaperone Cdc37-like 1	CDC37L1
	1516	ENSG00000127527	0.226567	2.35271	1.92353	unchanged	Q9UBC2-2;Q9UBC2;Q9UBC2-3;M0R165;Q9UBC2-4	Epidermal growth factor receptor substrate 15-like 1	EPS15L1
	1517	ENSG00000160305	0.226067	2.75474	2.22752	unchanged	Q14689;A0A494C143;Q14689-6;Q14689-3;Q14689-2;Q14689-4;Q14689-5	Disco-interacting protein 2 homolog A	DIP2A
	1518	ENSG00000111716	0.225967	2.28127	1.86684	unchanged	P07195;A0A5F9ZHM4;A0A3B3IS95;A8MW50	L-lactate dehydrogenase B chain;L-lactate dehydrogenase	LDHB
	1519	ENSG00000112367	0.225967	2.45362	1.99873	unchanged	Q92562;Q5TCS5	Polyphosphoinositide phosphatase	FIG4
	1520	ENSG00000179335	0.225933	1.72135	1.4238	unchanged	P49761;P49761-1;P49761-3;H3BQG1	Dual specificity protein kinase CLK3	CLK3
	1521	ENSG00000071082	0.225833	2.06577	1.69881	unchanged	P62899;P62899-3;P62899-2;H7C2W9;C9JU56;B7Z4E3;B7Z4C8	60S ribosomal protein L31	RPL31
	1522	ENSG00000070087	0.225767	1.87158	1.54372	unchanged	P35080-2;G5E9Q6;C9J0J7;C9JQ45	Profilin-2;Profilin	PFN2
	1523	ENSG00000104969	0.2257	2.37734	1.94284	unchanged	O43765;K7EMD6	Small glutamine-rich tetratricopeptide repeat-containing protein alpha	SGTA
	1524	ENSG00000276644	0.2256	1.82462	1.50738	unchanged	Q9UI36;Q9UI36-2;Q9UI36-3;Q9UI36-4	Dachshund homolog 1	DACH1
	1525	ENSG00000100519	0.225567	2.76051	2.23164	unchanged	P62333;A0A087X2I1	26S protease regulatory subunit 10B	PSMC6
	1526	ENSG00000158006	0.225567	2.83711	2.28851	unchanged	Q99487;Q5SY00;Q5SY01	Platelet-activating factor acetylhydrolase 2, cytoplasmic	PAFAH2
	1527	ENSG00000175115	0.225433	2.66483	2.16015	unchanged	Q6VY07;Q6VY07-2	Phosphofurin acidic cluster sorting protein 1	PACS1
	1528	ENSG00000142552	0.225333	2.14035	1.75436	unchanged	Q96D15;M0QZH0	Reticulocalbin-3	RCN3
	1529	ENSG00000167487	0.225233	2.47171	2.01199	unchanged	Q53HC5	Kelch-like protein 26	KLHL26
	1530	ENSG00000012822	0.2251	2.59286	2.10322	unchanged	Q9P1Z2;Q9P1Z2-2;Q9P1Z2-3;Q9P1Z2-4	Calcium-binding and coiled-coil domain-containing protein 1	CALCOCO1
	1531	ENSG00000171824	0.2249	1.66325	1.37695	unchanged	Q01780;Q01780-2	Exosome component 10	EXOSC10
	1532	ENSG00000155366	0.2244	2.03232	1.6716	unchanged	P08134;E9PQH6;Q5JR08;Q5JR07;Q5JR05;U3KQA9;U3KQV3	Rho-related GTP-binding protein RhoC	RHOC
	1533	ENSG00000173692	0.224367	2.75635	2.22853	unchanged	Q99460;A0A087WW66;Q99460-2	26S proteasome non-ATPase regulatory subunit 1	PSMD1
	1534	ENSG00000175792	0.224233	2.52077	2.05036	unchanged	Q9Y265;Q9Y265-2;E7ETR0	RuvB-like 1	RUVBL1
	1535	ENSG00000133083	0.224167	2.46079	2.00397	unchanged	O15075;O15075-2;Q5VZY9	Serine/threonine-protein kinase DCLK1	DCLK1
	1536	ENSG00000196839	0.224	1.37098	1.14022	unchanged	P00813;F5GWI4;F5GXW0	Adenosine deaminase	ADA
	1537	ENSG00000146872	0.2239	1.90526	1.57087	unchanged	Q86UE8-3;Q86UE8-2;Q86UE8;J3KRK0;J3QLK5;J3QS44	Serine/threonine-protein kinase tousled-like 2	TLK2
	1538	ENSG00000152253	0.223733	2.23303	1.82875	unchanged	Q9HBM1;C9JW94	Kinetochore protein Spc25	SPC25
	1539	ENSG00000138231	0.223733	2.33909	1.91229	unchanged	Q9UK59;Q9UK59-2	Lariat debranching enzyme	DBR1
	1540	ENSG00000149782	0.2237	2.28717	1.87126	unchanged	Q01970;Q01970-2	1-phosphatidylinositol 4,5-bisphosphate phosphodiesterase beta-3	PLCB3
	1541	ENSG00000029993	0.2233	1.41994	1.17978	unchanged	O15347;E9PES6;E7ES08;E7EQU1	High mobility group protein B3	HMGB3
	1542	ENSG00000079805	0.2233	2.66282	2.15886	unchanged	P50570;P50570-5;P50570-2	Dynamin-2	DNM2
	1543	ENSG00000062822	0.223033	2.69397	2.18084	unchanged	P28340;M0R2B7;A0A087WYJ2;M0QZR8;A0A2R8Y7K6	DNA polymerase delta catalytic subunit;DNA polymerase	POLD1
	1544	ENSG00000166165	0.222933	1.30762	1.08699	unchanged	P12277;G3V4N7	Creatine kinase B-type	CKB
	1545	ENSG00000092978	0.222467	2.12581	1.74355	unchanged	Q9NW75;Q9NW75-2	G patch domain-containing protein 2	GPATCH2
	1546	ENSG00000131504	0.222167	1.90754	1.57218	unchanged	O60610;O60610-2;A0A140T8Z0;A0A0G2JH68;O60610-3;H9KV28;A0A2R8Y5N1	Protein diaphanous homolog 1	DIAPH1
	1547	ENSG00000136205	0.221967	2.44873	1.99513	unchanged	Q68CZ2;Q68CZ2-2;E9PCX8	Tensin-3	TNS3
	1548	ENSG00000171241	0.221967	2.84451	2.29391	unchanged	Q8NEM2	SHC SH2 domain-binding protein 1	SHCBP1
	1549	ENSG00000162065	0.221867	2.74093	2.21768	unchanged	Q9ULP9;H3BV07;A0A2R8Y518;Q9ULP9-2;A0A0D9SFR5;H3BQ06	TBC1 domain family member 24	TBC1D24
	1550	ENSG00000005007	0.221767	2.94631	2.36818	unchanged	Q92900;Q92900-2	Regulator of nonsense transcripts 1	UPF1
	1551	ENSG00000136628	0.221133	2.66394	2.15944	unchanged	P07814;V9GYZ6	Bifunctional glutamate/proline--tRNA ligase;Glutamate--tRNA ligase;Proline--tRNA ligase	EPRS
	1552	ENSG00000123374	0.220967	2.30744	1.88803	unchanged	P24941;G3V5T9;P24941-2;E7ESI2	Cyclin-dependent kinase 2	CDK2
	1553	ENSG00000197265	0.220833	1.93353	1.5919	unchanged	P29084;E5RH41	Transcription initiation factor IIE subunit beta	GTF2E2
	1554	ENSG00000197226	0.220767	1.56123	1.29629	unchanged	Q66K14;Q66K14-2	TBC1 domain family member 9B	TBC1D9B
	1555	ENSG00000139722	0.2207	2.00448	1.64826	unchanged	Q9H9H4;F5H4M0;F5H1F6	Vacuolar protein sorting-associated protein 37B	VPS37B
	1556	ENSG00000107614	0.2207	2.36455	1.9331	unchanged	O14717;B7Z8H2;O14717-3;O14717-2;H0Y2T8	tRNA (cytosine(38)-C(5))-methyltransferase	TRDMT1
	1557	ENSG00000233276	0.220367	2.66338	2.15924	unchanged	P07203;A0A087WUQ6;A0A2R8Y6B6	Glutathione peroxidase 1;Glutathione peroxidase	GPX1
	1558	ENSG00000137275	0.220333	2.24842	1.84022	unchanged	Q13546;Q13546-2	Receptor-interacting serine/threonine-protein kinase 1	RIPK1
	1559	ENSG00000125386	0.220267	1.41755	1.17818	unchanged	A0A1B0GVL4	NA	NA
	1560	ENSG00000196712	0.220167	2.48287	2.02037	unchanged	P21359;P21359-2;P21359-6;H0Y465;J3KSB5;P21359-4	Neurofibromin;Neurofibromin truncated	NF1
	1561	ENSG00000102753	0.2198	3.00662	2.41356	unchanged	O00505	Importin subunit alpha-4	KPNA3
	1562	ENSG00000149182	0.219767	2.15395	1.76479	unchanged	Q8N6H7;G5E9L0;Q8N6H7-2;A0A0D9SF70;E9PQP3;Q8N6H7-3;E9PIY6;H0YDN9	ADP-ribosylation factor GTPase-activating protein 2	ARFGAP2
	1563	ENSG00000157796	0.219733	1.97795	1.62732	unchanged	Q8NEZ3;D6R9P6;Q8NEZ3-2	WD repeat-containing protein 19	WDR19
	1564	ENSG00000152409	0.219667	2.07494	1.70521	unchanged	Q8N9B5;Q8N9B5-2	Junction-mediating and -regulatory protein	JMY
	1565	ENSG00000162601	0.2196	2.75601	2.22841	unchanged	Q5VVJ2;A0A590UJD8;A0A590UK32;A0A590UJW2;Q5VVJ2-2	Histone H2A deubiquitinase MYSM1	MYSM1
	1566	ENSG00000086544	0.219433	1.8641	1.53779	unchanged	Q96DU7	Inositol-trisphosphate 3-kinase C	ITPKC
	1567	ENSG00000101079	0.219233	1.55024	1.28757	unchanged	Q9UGV2;Q5TH30;Q9UGV2-3;F8WBF9;Q9UGV2-2	Protein NDRG3	NDRG3
	1568	ENSG00000129003	0.219133	1.96961	1.62075	unchanged	Q709C8;Q709C8-3;Q709C8-4;Q709C8-2	Vacuolar protein sorting-associated protein 13C	VPS13C
	1569	ENSG00000132323	0.2191	2.78543	2.25147	unchanged	Q9H0C8;E9PC05;F8SNU7	Integrin-linked kinase-associated serine/threonine phosphatase 2C	ILKAP;ILKAP3
	1570	ENSG00000126432	0.218967	2.30294	1.88439	unchanged	P30044;P30044-2;P30044-3;P30044-4	Peroxiredoxin-5, mitochondrial	PRDX5
	1571	ENSG00000132199	0.218867	1.45405	1.20728	unchanged	Q7L5Y1;A0A3F2YNX7;Q7L5Y1-4;Q7L5Y1-5;J3QL81;Q7L5Y1-2;Q7L5Y1-6	Mitochondrial enolase superfamily member 1	ENOSF1
	1572	ENSG00000115415	0.218433	2.37539	1.9415	unchanged	P42224;P42224-2;J3KPM9	Signal transducer and activator of transcription 1-alpha/beta;Signal transducer and activator of transcription	STAT1
	1573	ENSG00000127311	0.2184	2.80147	2.26196	unchanged	Q8NG08;F5H1I4;Q8NG08-2	DNA helicase B	HELB
	1574	ENSG00000172301	0.2181	1.59863	1.32522	unchanged	Q9NQ92;H9KV77;J3QRX6	Coordinator of PRMT5 and differentiation stimulator	COPRS
	1575	ENSG00000174748	0.217933	2.01861	1.65996	unchanged	P61313;A0A2R8YEM3;E7EQV9;E7ENU7;E7EX53;A0A2R8Y738	60S ribosomal protein L15;Ribosomal protein L15	RPL15
	1576	ENSG00000177189	0.2178	2.61421	2.1209	unchanged	P51812;B4DG22;B1AXG1;B7ZB17;A0A2R8Y603	Ribosomal protein S6 kinase alpha-3	RPS6KA3
	1577	ENSG00000079215	0.217433	2.69586	2.18172	unchanged	P43003;A0A087X0U3;A0A087WT87;P43003-2	Excitatory amino acid transporter 1;Amino acid transporter	SLC1A3
	1578	ENSG00000115306	0.2174	1.69593	1.40349	unchanged	Q01082;A0A087WUZ3	Spectrin beta chain, non-erythrocytic 1	SPTBN1
	1579	ENSG00000275835	0.216933	1.85058	1.52807	unchanged	A0A0G2JSA7;A0A087X1Z1;Q96RT8;Q96RT8-2;A0A0G2JQX1;A0A0G2JPW5	Gamma-tubulin complex component 5	TUBGCP5
	1580	ENSG00000224470	0.216933	2.34741	1.91929	unchanged	P0C7T5	Ataxin-1-like	ATXN1L
	1581	ENSG00000159079	0.216533	1.8246	1.50738	unchanged	P57076;H7BZW1;C9JX57;D3DSE6;C9J818;F8VZ95;H7C2R6	UPF0769 protein C21orf59	C21orf59
	1582	ENSG00000164543	0.216433	1.2714	1.05728	unchanged	Q9UEE5	Serine/threonine-protein kinase 17A	STK17A
	1583	ENSG00000009307	0.216433	2.37254	1.93926	unchanged	O75534;O75534-4	Cold shock domain-containing protein E1	CSDE1
	1584	ENSG00000151239	0.2164	1.9245	1.58473	unchanged	Q12792;Q12792-3;F8VS81;Q12792-4;F8W1Q9	Twinfilin-1	TWF1
	1585	ENSG00000060069	0.216267	1.89975	1.56645	unchanged	Q9Y5B0;A0A0A0MR03;K7EJD2;Q9Y5B0-4;A0A0J9YWB6;A0A0J9YWJ4	RNA polymerase II subunit A C-terminal domain phosphatase	CTDP1
	1586	ENSG00000138802	0.216233	2.38771	1.94997	unchanged	O95487;O95487-3;O95487-2	Protein transport protein Sec24B	SEC24B
	1587	ENSG00000144426	0.215867	1.86626	1.53947	unchanged	Q6ZS30;Q6ZS30-1	Neurobeachin-like protein 1	NBEAL1
	1588	ENSG00000068394	0.2158	2.52557	2.05383	unchanged	Q92917	G patch domain and KOW motifs-containing protein	GPKOW
	1589	ENSG00000198863	0.2158	2.63516	2.13621	unchanged	Q96C34;Q96C34-2	RUN domain-containing protein 1	RUNDC1
	1590	ENSG00000104231	0.215567	1.69092	1.39947	unchanged	Q8TCF1;Q8TCF1-3;E5RIS3;Q8TCF1-4	AN1-type zinc finger protein 1	ZFAND1
	1591	ENSG00000137171	0.215167	1.59464	1.32258	unchanged	Q9NSK0;Q9NSK0-3;Q9NSK0-5;C9J8T5;Q9NSK0-4	Kinesin light chain 4	KLC4
	1592	ENSG00000142230	0.215067	1.76392	1.45949	unchanged	Q9UBE0;M0QZS6;Q9UBE0-3;B3KNJ4;Q9UBE0-2	SUMO-activating enzyme subunit 1;SUMO-activating enzyme subunit 1, N-terminally processed	SAE1
	1593	ENSG00000196230	0.214867	2.58246	2.0954	unchanged	P07437;Q5JP53;Q5ST81	Tubulin beta chain	TUBB
	1594	ENSG00000106263	0.214767	1.77674	1.47004	unchanged	P55884;P55884-2	Eukaryotic translation initiation factor 3 subunit B	EIF3B
	1595	ENSG00000142186	0.214533	2.10075	1.72505	unchanged	Q96KG9;Q96KG9-2;E9PS17;E9PK59;Q96KG9-3;Q96KG9-4;E9PPN3;Q96KG9-5;Q96KG9-6	N-terminal kinase-like protein	SCYL1
	1596	ENSG00000107262	0.214433	1.76004	1.45641	unchanged	Q99933;J3QTA2;Q99933-4;Q99933-3;Q99933-2	BAG family molecular chaperone regulator 1	BAG1
	1597	ENSG00000153574	0.214433	2.15197	1.76337	unchanged	P49247	Ribose-5-phosphate isomerase	RPIA
	1598	ENSG00000134461	0.2141	1.27478	1.05982	unchanged	Q6P6B7;Q6P6B7-2	Ankyrin repeat domain-containing protein 16	ANKRD16
	1599	ENSG00000105821	0.213733	2.13336	1.74873	unchanged	Q99543;Q99543-2	DnaJ homolog subfamily C member 2;DnaJ homolog subfamily C member 2, N-terminally processed	DNAJC2
	1600	ENSG00000077721	0.213733	2.2004	1.80176	unchanged	P49459;A0A0D9SG71;A0A0R4J2E5;P49459-3;A0A0D9SEZ6;P49459-2	Ubiquitin-conjugating enzyme E2 A	UBE2A
	1601	ENSG00000197943	0.2137	1.65452	1.36952	unchanged	P16885;A0A0A0MRF9	1-phosphatidylinositol 4,5-bisphosphate phosphodiesterase gamma-2;Phosphoinositide phospholipase C	PLCG2
	1602	ENSG00000173530	0.2137	2.0482	1.68463	unchanged	Q9UBN6	Tumor necrosis factor receptor superfamily member 10D	TNFRSF10D
	1603	ENSG00000067836	0.2136	1.59159	1.32038	unchanged	Q9GZN7;K7ERP1;K7EMJ5;K7EPS3	Protein rogdi homolog	ROGDI
	1604	ENSG00000108256	0.2136	2.76499	2.2353	unchanged	Q7Z417	Nuclear fragile X mental retardation-interacting protein 2	NUFIP2
	1605	ENSG00000105298	0.2135	2.88577	2.32258	unchanged	Q8WUQ7;Q8WUQ7-2;K7ENY9	Cactin	CACTIN
	1606	ENSG00000198642	0.213433	2.51218	2.04343	unchanged	Q9P2J3;Q9P2N7;A0A0C4DG80;Q9P2N7-2;Q9P2N7-3;Q9P2N7-4;Q9P2N7-5	Kelch-like protein 9;Kelch-like protein 13	KLHL9;KLHL13
	1607	ENSG00000173166	0.2134	1.36182	1.13278	unchanged	Q70E73;C9K0J5;C9J164;Q70E73-5;Q70E73-2;Q70E73-8;Q70E73-7;Q70E73-4;Q70E73-3;Q70E73-9;Q70E73-6	Ras-associated and pleckstrin homology domains-containing protein 1	RAPH1
	1608	ENSG00000167962	0.213367	2.34085	1.91379	unchanged	Q86UK7;Q86UK7-2;Q86UK7-3;H3BPG6;H3BQQ2	Zinc finger protein 598	ZNF598
	1609	ENSG00000128923	0.2132	1.36954	1.13916	unchanged	Q8NBR6;J3KNL7;Q8NBR6-2;H0YM15	Protein FAM63B	FAM63B
	1610	ENSG00000137692	0.213067	2.3364	1.91039	unchanged	Q9BTE7;E9PM04;H0YCN4	DCN1-like protein 5;DCN1-like protein	DCUN1D5
	1611	ENSG00000163636	0.213033	2.17395	1.78043	unchanged	Q15008;Q15008-4;Q15008-3;Q15008-2	26S proteasome non-ATPase regulatory subunit 6	PSMD6
	1612	ENSG00000130816	0.213	2.46111	2.00397	unchanged	P26358;P26358-2;P26358-3	DNA (cytosine-5)-methyltransferase 1	DNMT1
	1613	ENSG00000171475	0.212967	1.50042	1.24633	unchanged	Q8TF74;Q8TF74-2	WAS/WASL-interacting protein family member 2	WIPF2
	1614	ENSG00000135913	0.212633	2.01848	1.65996	unchanged	Q86T82;Q86T82-2	Ubiquitin carboxyl-terminal hydrolase 37	USP37
	1615	ENSG00000175575	0.212633	2.49282	2.02721	unchanged	Q9BRP4;F5H0C4;Q9BRP4-2;Q9BRP4-3;F5H0F7;F5H103;F5H3I1	Proteasomal ATPase-associated factor 1	PAAF1
	1616	ENSG00000074319	0.212567	2.20661	1.80706	unchanged	Q99816;F5H442;Q99816-2	Tumor susceptibility gene 101 protein	TSG101
	1617	ENSG00000176101	0.2125	1.30552	1.08526	unchanged	O43805;A0A087WV26	Sjoegren syndrome nuclear autoantigen 1	SSNA1
	1618	ENSG00000284770	0.212	1.97922	1.62822	unchanged	Q15813;Q15813-2;A0A2R8Y5Q8;A0A2R8YHI9;A0A2R8Y7E7;A0A2U3TZJ6;A0A2R8Y6Q1;A0A2R8YFL4;A0A2R8YER9;A0A2R8Y4V6;A0A2R8Y809	Tubulin-specific chaperone E	TBCE
	1619	ENSG00000104889	0.211967	1.53255	1.27368	unchanged	O75792	Ribonuclease H2 subunit A	RNASEH2A
	1620	ENSG00000107223	0.2118	1.34899	1.12205	unchanged	O60869;O60869-2;O60869-3	Endothelial differentiation-related factor 1	EDF1
	1621	ENSG00000172922	0.211167	1.91441	1.57746	unchanged	Q8TDP1;E9PN81	Ribonuclease H2 subunit C	RNASEH2C
	1622	ENSG00000170191	0.211167	2.7527	2.22586	unchanged	Q8TBE9	N-acylneuraminate-9-phosphatase	NANP
	1623	ENSG00000115541	0.211133	1.85278	1.52933	unchanged	P61604;B8ZZ54;B8ZZL8	10 kDa heat shock protein, mitochondrial	HSPE1
	1624	ENSG00000132879	0.2111	2.0588	1.69288	unchanged	Q9H4M3-2;A0A0A0MSI6;B7Z1P2;Q9H4M3	F-box only protein 44	FBXO44
	1625	ENSG00000126458	0.210467	1.83834	1.51807	unchanged	P10301	Ras-related protein R-Ras	RRAS
	1626	ENSG00000123908	0.2103	2.90071	2.33318	unchanged	Q9UKV8;Q9UKV8-2	Protein argonaute-2	AGO2
	1627	ENSG00000124614	0.2102	1.9336	1.5919	unchanged	P46783	40S ribosomal protein S10	RPS10
	1628	ENSG00000028528	0.210167	2.41444	1.9697	unchanged	Q13596;Q13596-2;Q13596-3;H0YK42	Sorting nexin-1	SNX1
	1629	ENSG00000119723	0.2101	2.30537	1.88622	unchanged	Q9Y2Z9;A0A0D9SFJ1;Q9Y2Z9-3;Q9Y2Z9-2	Ubiquinone biosynthesis monooxygenase COQ6, mitochondrial	COQ6
	1630	ENSG00000113387	0.21	1.21647	1.01282	unchanged	P53999	Activated RNA polymerase II transcriptional coactivator p15	SUB1
	1631	ENSG00000119318	0.2099	2.06523	1.69839	unchanged	P54727;P54727-2	UV excision repair protein RAD23 homolog B	RAD23B
	1632	ENSG00000135040	0.209833	2.06352	1.69708	unchanged	Q5VZE5	N-alpha-acetyltransferase 35, NatC auxiliary subunit	NAA35
	1633	ENSG00000144134	0.2097	1.89802	1.56497	unchanged	Q9UBK7-2;Q9UNT1-2;Q9UNT1;Q9UBK7;B7ZBD5;A8MXF6;Q9UNT1-3;Q9UBK7-3	Rab-like protein 2A;Rab-like protein 2B	RABL2A;RABL2B
	1634	ENSG00000022267	0.2096	2.77107	2.24061	unchanged	Q13642-1;Q13642-4;Q13642-5;A0A494C0D6;Q5JXI8;Q13642;Q5JXH8;Q5JXI3;Q5JXH7;A0A0D9SFZ9;Q13642-3;Q5JXI2;A0A0D9SFB0;Q5JXH9;A0A0D9SFI6	Four and a half LIM domains protein 1	FHL1
	1635	ENSG00000197860	0.2095	1.98999	1.63658	unchanged	Q96EQ0;D6RFW1	Small glutamine-rich tetratricopeptide repeat-containing protein beta	SGTB
	1636	ENSG00000119487	0.2095	2.04695	1.68368	unchanged	Q9BPZ7;Q9BPZ7-3;Q9BPZ7-2;E9PGB8;B1AMA5;Q9BPZ7-5;Q9BPZ7-4;Q9BPZ7-6	Target of rapamycin complex 2 subunit MAPKAP1	MAPKAP1
	1637	ENSG00000198961	0.209333	2.24785	1.84015	unchanged	O43164;O43164-2	E3 ubiquitin-protein ligase Praja-2	PJA2
	1638	ENSG00000148308	0.209167	2.20273	1.80366	unchanged	Q9Y5Q8;Q9Y5Q8-2;Q9Y5Q8-3;Q5T7U1;H7BY84	General transcription factor 3C polypeptide 5	GTF3C5
	1639	ENSG00000110330	0.209067	1.71587	1.41954	unchanged	Q13490;E9PMH5;Q13490-2;A0A087X2B2	Baculoviral IAP repeat-containing protein 2	BIRC2
	1640	ENSG00000100591	0.209	2.14563	1.7584	unchanged	O95433;O95433-2;G3V438	Activator of 90 kDa heat shock protein ATPase homolog 1	AHSA1
	1641	ENSG00000151914	0.208933	2.30988	1.88999	unchanged	Q03001;F8W9J4	Dystonin	DST
	1642	ENSG00000165458	0.208767	1.87324	1.54514	unchanged	O15357;O15357-2;A0A0A0MTP6	Phosphatidylinositol 3,4,5-trisphosphate 5-phosphatase 2	INPPL1
	1643	ENSG00000134480	0.208433	2.00955	1.65244	unchanged	P51946;A0A2R8YEM2;D6RHI7;D6RG18	Cyclin-H	CCNH
	1644	ENSG00000065243	0.2084	2.75637	2.22853	unchanged	Q16513;Q16513-2;Q16513-3;Q16513-4;B1AL79;Q16513-5	Serine/threonine-protein kinase N2	PKN2
	1645	ENSG00000197713	0.2084	2.83579	2.28759	unchanged	Q96AT9;C9J9T0;C9IZU8;Q96AT9-4;Q96AT9-2;C9J6A7;Q96AT9-5;Q96AT9-3	Ribulose-phosphate 3-epimerase	RPE
	1646	ENSG00000165630	0.2079	2.44768	1.99423	unchanged	Q99633;Q5T9P8;Q5T9P7	Pre-mRNA-splicing factor 18	PRPF18
	1647	ENSG00000172340	0.207867	1.76964	1.4642	unchanged	Q96I99;E9PDQ8;Q96I99-2;H0Y852	Succinyl-CoA ligase [GDP-forming] subunit beta, mitochondrial	SUCLG2
	1648	ENSG00000114790	0.207767	2.47156	2.01199	unchanged	Q96DR7;Q96DR7-4	Rho guanine nucleotide exchange factor 26	ARHGEF26
	1649	ENSG00000145604	0.207733	2.23587	1.83098	unchanged	Q13309;A0A0A0MTL5;Q13309-2;D6RAG5;D6R9R7	S-phase kinase-associated protein 2	SKP2
	1650	ENSG00000116918	0.207667	2.82378	2.27836	unchanged	Q99598;C4P0D6;C4P0D8	Translin-associated protein X	TSNAX;DISC1
	1651	ENSG00000120727	0.207467	1.44533	1.19985	unchanged	Q9BPZ3;D6RA77	Polyadenylate-binding protein-interacting protein 2	PAIP2
	1652	ENSG00000147400	0.207367	2.42743	1.98	unchanged	P41208	Centrin-2	CETN2
	1653	ENSG00000131375	0.2073	1.40187	1.16569	unchanged	Q9Y6W3	Calpain-7	CAPN7
	1654	ENSG00000198937	0.207167	1.42321	1.18236	unchanged	Q9P0B6	Coiled-coil domain-containing protein 167	CCDC167
	1655	ENSG00000157020	0.206433	2.16219	1.77109	unchanged	P55735;P55735-2;P55735-4;P55735-3;A8MXL6	Protein SEC13 homolog	SEC13
	1656	ENSG00000167325	0.206367	1.67175	1.38414	unchanged	P23921	Ribonucleoside-diphosphate reductase large subunit	RRM1
	1657	ENSG00000100442	0.2063	2.33875	1.91229	unchanged	Q00688	Peptidyl-prolyl cis-trans isomerase FKBP3	FKBP3
	1658	ENSG00000107643	0.206133	1.42183	1.18138	unchanged	P45983-3;P45983-2;P45983-4;P45983;A0A286YEV8;P45983-5	Mitogen-activated protein kinase 8	MAPK8
	1659	ENSG00000065833	0.205533	1.64001	1.35686	unchanged	P48163;P48163-2	NADP-dependent malic enzyme	ME1
	1660	ENSG00000205531	0.2054	1.6468	1.36321	unchanged	Q99733-2;Q99733;C9JZI7;H0YCI4;C9J6D1	Nucleosome assembly protein 1-like 4	NAP1L4
	1661	ENSG00000181938	0.205233	2.07792	1.70714	unchanged	Q9BRX5;Q9BRX5-3;Q9BRX5-2	DNA replication complex GINS protein PSF3	GINS3
	1662	ENSG00000080824	0.205167	1.41158	1.17366	unchanged	P07900;P07900-2	Heat shock protein HSP 90-alpha	HSP90AA1
	1663	ENSG00000107371	0.204967	1.52196	1.26482	unchanged	Q9NQT5	Exosome complex component RRP40	EXOSC3
	1664	ENSG00000130713	0.204967	1.60573	1.33029	unchanged	Q13868;A3KFL2;Q13868-2;A3KFL5;Q13868-3;A3KFL1	Exosome complex component RRP4	EXOSC2
	1665	ENSG00000136754	0.204833	2.53521	2.06029	unchanged	Q8IZP0;Q8IZP0-3;Q8IZP0-2;B6VEX4;A0A0A0MRT6;Q8IZP0-10;Q8IZP0-8;Q8IZP0-7;Q8IZP0-4;Q8IZP0-5;Q8IZP0-6;Q8IZP0-9;Q8IZP0-12;Q8IZP0-11	Abl interactor 1	ABI1
	1666	ENSG00000152242	0.204767	2.22976	1.82632	unchanged	Q96B23;A0A087WVF1	Uncharacterized protein C18orf25	C18orf25
	1667	ENSG00000163743	0.204767	2.57644	2.09216	unchanged	Q96PM5;Q96PM5-6;Q96PM5-2;Q96PM5-3;Q96PM5-4;Q96PM5-8;Q96PM5-7	RING finger and CHY zinc finger domain-containing protein 1	RCHY1
	1668	ENSG00000237649	0.2047	2.79371	2.25664	unchanged	Q9BW19	Kinesin-like protein KIFC1	KIFC1
	1669	ENSG00000143321	0.204467	2.03241	1.6716	unchanged	P51858;P51858-3;P51858-2	Hepatoma-derived growth factor	HDGF
	1670	ENSG00000104524	0.2044	1.67197	1.38425	unchanged	Q53H96;A0A0A0MQS1;Q53H96-2;B5MD87	Pyrroline-5-carboxylate reductase 3;Pyrroline-5-carboxylate reductase	PYCRL
	1671	ENSG00000087302	0.204367	1.96778	1.6193	unchanged	Q9Y224;G3V4C6	UPF0568 protein C14orf166	C14orf166
	1672	ENSG00000234127	0.203933	2.51528	2.04619	unchanged	Q12899;A2AE48	Tripartite motif-containing protein 26	TRIM26
	1673	ENSG00000047188	0.203767	2.25155	1.84291	unchanged	Q9H6S0;D6RA70	Probable ATP-dependent RNA helicase YTHDC2	YTHDC2
	1674	ENSG00000111300	0.203433	1.90082	1.56728	unchanged	Q14CX7;Q14CX7-2	N-alpha-acetyltransferase 25, NatB auxiliary subunit	NAA25
	1675	ENSG00000068366	0.203167	2.43335	1.98468	unchanged	O60488;O60488-2	Long-chain-fatty-acid--CoA ligase 4	ACSL4
	1676	ENSG00000164975	0.202833	1.5016	1.2471	unchanged	Q92966;Q5T282	snRNA-activating protein complex subunit 3	SNAPC3
	1677	ENSG00000111725	0.202333	1.68117	1.39203	unchanged	Q9Y478;F5H2X8	5-AMP-activated protein kinase subunit beta-1	PRKAB1
	1678	ENSG00000105053	0.2021	2.20667	1.80706	unchanged	Q8IV63;Q8IV63-3;Q8IV63-2;M0R073;M0QYA8	Inactive serine/threonine-protein kinase VRK3	VRK3
	1679	ENSG00000130811	0.201967	2.58895	2.10001	unchanged	O75821;K7EL20;K7ENA8	Eukaryotic translation initiation factor 3 subunit G	EIF3G
	1680	ENSG00000145050	0.201833	1.56995	1.30272	unchanged	P55145;A8K878	Mesencephalic astrocyte-derived neurotrophic factor	MANF
	1681	ENSG00000179562	0.201633	2.40766	1.96496	unchanged	Q96CN9	GRIP and coiled-coil domain-containing protein 1	GCC1
	1682	ENSG00000203668	0.2015	1.85796	1.53367	unchanged	P26374	Rab proteins geranylgeranyltransferase component A 2	CHML
	1683	ENSG00000155330	0.2014	1.24181	1.03337	unchanged	Q6PH81;Q6PH81-2	UPF0547 protein C16orf87	C16orf87
	1684	ENSG00000106399	0.201167	2.52563	2.05383	unchanged	P35244;B5MC59	Replication protein A 14 kDa subunit	RPA3
	1685	ENSG00000260916	0.201067	2.56014	2.07962	unchanged	Q9ULG6;Q9ULG6-2;Q9ULG6-5;Q9ULG6-3;Q9ULG6-4	Cell cycle progression protein 1	CCPG1
	1686	ENSG00000088356	0.200967	1.59561	1.32304	unchanged	Q9NUG6	p53 and DNA damage-regulated protein 1	PDRG1
	1687	ENSG00000020256	0.200567	1.74092	1.44034	unchanged	Q9NTW7-6;Q9NTW7-4;Q9NTW7-5	Zinc finger protein 64 homolog, isoforms 3 and 4	ZFP64
	1688	ENSG00000168439	0.200367	1.57868	1.30999	unchanged	P31948;P31948-2;P31948-3;F5H783	Stress-induced-phosphoprotein 1	STIP1
	1689	ENSG00000123737	0.200233	2.14035	1.75436	unchanged	Q06265;Q06265-2;D6RIY6;D6R905;D6RA17;Q06265-3;Q06265-4	Exosome complex component RRP45	EXOSC9
	1690	ENSG00000137073	0.200067	1.69469	1.40258	unchanged	Q5T6F2	Ubiquitin-associated protein 2	UBAP2
	1691	ENSG00000148426	0.1999	1.69794	1.40506	unchanged	Q86WR7;Q86WR7-2;X6RHS9	Proline and serine-rich protein 2	PROSER2
	1692	ENSG00000105835	0.1999	1.86688	1.53985	unchanged	P43490;A0A0C4DFS8	Nicotinamide phosphoribosyltransferase	NAMPT
	1693	ENSG00000076984	0.199733	1.51401	1.25779	unchanged	O14733;O14733-4;O14733-3;O14733-2	Dual specificity mitogen-activated protein kinase kinase 7	MAP2K7
	1694	ENSG00000127452	0.1997	2.06451	1.69794	unchanged	Q9NXK8;Q9NXK8-2	F-box/LRR-repeat protein 12	FBXL12
	1695	ENSG00000090273	0.199633	2.36629	1.93469	unchanged	Q9Y266;A0A0A0MSU9	Nuclear migration protein nudC	NUDC
	1696	ENSG00000123144	0.199367	2.05832	1.69279	unchanged	Q9BQ61;K7EN60	Uncharacterized protein C19orf43	C19orf43
	1697	ENSG00000063601	0.199333	2.06933	1.70092	unchanged	Q13613;F8WA39;Q13613-2;Q8NEC6;H0YDX3	Myotubularin-related protein 1	MTMR1
	1698	ENSG00000118961	0.199267	1.65017	1.36604	unchanged	Q9H6V9;Q9H6V9-2;B5MDU6;B5MCE2;C9JUM0;B4DRG3;A0A0A0MSH6;Q9H6V9-3	UPF0554 protein C2orf43	C2orf43;LDAH;FLJ21820
	1699	ENSG00000101224	0.199167	1.68471	1.39486	unchanged	P30305;G8JLH2;B4DIG0;P30305-2;P30305-3;P30305-4	M-phase inducer phosphatase 2	CDC25B
	1700	ENSG00000100225	0.1989	1.28363	1.06738	unchanged	Q9Y3I1;Q9Y3I1-3;Q9Y3I1-2	F-box only protein 7	FBXO7
	1701	ENSG00000197102	0.198833	2.25938	1.84947	unchanged	Q14204	Cytoplasmic dynein 1 heavy chain 1	DYNC1H1
	1702	ENSG00000120696	0.1987	2.11544	1.7361	unchanged	Q8WVZ9	Kelch repeat and BTB domain-containing protein 7	KBTBD7
	1703	ENSG00000104976	0.1987	2.12727	1.74428	unchanged	Q13487;M0QXY9	snRNA-activating protein complex subunit 2	SNAPC2
	1704	ENSG00000151849	0.198667	1.23583	1.02865	unchanged	Q9HC77;F6VUX8;Q9HC77-2	Centromere protein J	CENPJ
	1705	ENSG00000104299	0.198233	2.32886	1.9048	unchanged	Q9NV88;Q9NV88-3;Q9NV88-2;G3XAN1	Integrator complex subunit 9	INTS9
	1706	ENSG00000134318	0.198167	2.03986	1.67785	unchanged	O75116;E9PF63;Q14DU5	Rho-associated protein kinase 2	ROCK2
	1707	ENSG00000111785	0.1977	2.15608	1.76639	unchanged	Q9NVN3;Q9NVN3-1;B7WPL0;Q9NVN3-3;H0YHS3;Q9NVN3-4	Synembryn-B	RIC8B
	1708	ENSG00000131711	0.197533	2.17491	1.78118	unchanged	P46821	Microtubule-associated protein 1B;MAP1B heavy chain;MAP1 light chain LC1	MAP1B
	1709	ENSG00000179115	0.1975	2.68461	2.17462	unchanged	Q9Y285;K7ER00;Q9Y285-2;K7ER16;K7EPH2	Phenylalanine--tRNA ligase alpha subunit	FARSA
	1710	ENSG00000132970	0.197433	1.50194	1.24724	unchanged	Q9UPY6;Q9UPY6-2;A0A590UJ74	Wiskott-Aldrich syndrome protein family member 3	WASF3
	1711	ENSG00000119414	0.1974	2.18449	1.78913	unchanged	O00743;O00743-2;O00743-3	Serine/threonine-protein phosphatase 6 catalytic subunit;Serine/threonine-protein phosphatase 6 catalytic subunit, N-terminally processed	PPP6C
	1712	ENSG00000128059	0.197367	1.81525	1.50007	unchanged	Q06203	Amidophosphoribosyltransferase	PPAT
	1713	ENSG00000231500	0.1973	1.3543	1.12621	unchanged	P62269	40S ribosomal protein S18	RPS18
	1714	ENSG00000100038	0.1973	2.60039	2.10936	unchanged	O95985;O95985-3;O95985-2;H0Y6W0	DNA topoisomerase 3-beta-1;DNA topoisomerase	TOP3B
	1715	ENSG00000165699	0.1972	1.90592	1.57117	unchanged	Q92574;A0A2R8Y5N2;Q92574-2;A0A2R8Y5S3;A0A2R8YFV7;A0A2R8Y6S1	Hamartin	TSC1
	1716	ENSG00000164904	0.197133	2.51776	2.04851	unchanged	P49419-2;P49419;A0A1B0GW77;A0A1B0GTG2;A0A1B0GTY9;A0A1B0GW82;A0A1B0GUA1;A0A1B0GTJ4;P49419-4;A0A1B0GV49;A0A0J9YWF7	Alpha-aminoadipic semialdehyde dehydrogenase	ALDH7A1
	1717	ENSG00000005022	0.196867	1.41008	1.17265	unchanged	P05141	ADP/ATP translocase 2;ADP/ATP translocase 2, N-terminally processed	SLC25A5
	1718	ENSG00000136819	0.196833	1.64793	1.36424	unchanged	Q9NZ63	Uncharacterized protein C9orf78	C9orf78
	1719	ENSG00000196526	0.1968	1.88707	1.55608	unchanged	Q8N556;Q8N556-2	Actin filament-associated protein 1	AFAP1
	1720	ENSG00000066654	0.1967	1.63547	1.35318	unchanged	Q9NXG2	THUMP domain-containing protein 1	THUMPD1
	1721	ENSG00000181929	0.196533	2.46928	2.01036	unchanged	P54619-3;P54619;P54619-2;F8VYY9;H0YIC9	5-AMP-activated protein kinase subunit gamma-1	PRKAG1
	1722	ENSG00000162688	0.196433	2.13141	1.74709	unchanged	P35573;P35573-2;P35573-3	Glycogen debranching enzyme;4-alpha-glucanotransferase;Amylo-alpha-1,6-glucosidase	AGL
	1723	ENSG00000168101	0.196167	1.54542	1.28337	unchanged	Q9BRJ7;K7EIN2;K7ENA3;W4VSQ8;Q9BRJ7-2	Protein syndesmos	NUDT16L1
	1724	ENSG00000188883	0.195967	1.6288	1.34813	unchanged	A4D1S0;A4D1S0-2	Killer cell lectin-like receptor subfamily G member 2	KLRG2
	1725	ENSG00000171960	0.195933	2.3263	1.9024	unchanged	O43447;C9JQD4;O43447-2;H0YEL5	Peptidyl-prolyl cis-trans isomerase H;Peptidyl-prolyl cis-trans isomerase	PPIH
	1726	ENSG00000205476	0.1959	2.38346	1.94663	unchanged	A6NKD9	Coiled-coil domain-containing protein 85C	CCDC85C
	1727	ENSG00000137942	0.195567	2.22449	1.82187	unchanged	Q5T0N5-4;Q5T0N5-3;Q5T0N5;S4R347;Q5T0N5-2;Q5T0N5-5;A0A075B6Q2	Formin-binding protein 1-like	FNBP1L
	1728	ENSG00000170606	0.195333	1.98364	1.63125	unchanged	P34932;A0A087WYC1;A0A087WTS8	Heat shock 70 kDa protein 4	HSPA4
	1729	ENSG00000204560	0.1952	2.32426	1.90095	unchanged	O60231;A0A140T947;Q5SQH5;A0A140T8Y5	Putative pre-mRNA-splicing factor ATP-dependent RNA helicase DHX16	DHX16
	1730	ENSG00000092964	0.1952	2.44603	1.99307	unchanged	A0A1C7CYX9;Q16555;Q16555-2	Dihydropyrimidinase-related protein 2	DPYSL2
	1731	ENSG00000110700	0.194967	1.91852	1.58037	unchanged	P62277;J3KMX5	40S ribosomal protein S13	RPS13
	1732	ENSG00000148411	0.194933	2.28723	1.87126	unchanged	Q96BF6	Nucleus accumbens-associated protein 2	NACC2
	1733	ENSG00000127586	0.194833	2.56285	2.08062	unchanged	Q8WVB6;Q8WVB6-2;E7EXA6;A0A0D9SF58;Q8WVB6-3	Chromosome transmission fidelity protein 18 homolog	CHTF18
	1734	ENSG00000051825	0.1947	1.95093	1.60533	unchanged	Q99550;A0A0A0MTP3;Q99550-2;H0YG46;J3KNE4	M-phase phosphoprotein 9	MPHOSPH9
	1735	ENSG00000163686	0.194633	2.14996	1.76204	unchanged	Q9BV23	Monoacylglycerol lipase ABHD6	ABHD6
	1736	ENSG00000172766	0.1944	1.95421	1.60786	unchanged	Q6N069;Q6N069-4;Q6N069-3;Q6N069-2	N-alpha-acetyltransferase 16, NatA auxiliary subunit	NAA16
	1737	ENSG00000124181	0.194367	2.02901	1.66932	unchanged	P19174-2;P19174	1-phosphatidylinositol 4,5-bisphosphate phosphodiesterase gamma-1	PLCG1
	1738	ENSG00000168040	0.194333	1.28678	1.07006	unchanged	Q13158	FAS-associated death domain protein	FADD
	1739	ENSG00000148362	0.194333	1.62702	1.34688	unchanged	Q9BUH6	Protein PAXX	C9orf142
	1740	ENSG00000173540	0.1941	2.02013	1.66122	unchanged	Q9Y5P6;Q9Y5P6-2	Mannose-1-phosphate guanyltransferase beta	GMPPB
	1741	ENSG00000144736	0.194033	2.25926	1.84947	unchanged	Q6PI26;Q6PI26-2	Protein SHQ1 homolog	SHQ1
	1742	ENSG00000123091	0.193667	2.10951	1.73139	unchanged	Q9Y3C5	RING finger protein 11	RNF11
	1743	ENSG00000112992	0.193567	1.32114	1.09863	unchanged	Q13423;A0A590UK15;A0A590UJM2;A0A590UK29;E9PCX7;A0A590UJI3	NAD(P) transhydrogenase, mitochondrial	NNT
	1744	ENSG00000064961	0.193333	1.76161	1.45775	unchanged	Q9P0W2;Q9P0W2-3;C9J8X5;Q9P0W2-2;B5MDG7	SWI/SNF-related matrix-associated actin-dependent regulator of chromatin subfamily E member 1-related	HMG20B
	1745	ENSG00000186193	0.193233	2.32982	1.90531	unchanged	Q86UD0	Suppressor APC domain-containing protein 2	SAPCD2
	1746	ENSG00000138758	0.1932	2.55292	2.07359	unchanged	Q9NVA2;D6RGI3;D6RER5;Q9NVA2-2;D6RDU5	Septin-11	SEPTIN11
	1747	ENSG00000164062	0.193167	2.28273	1.8677	unchanged	P13798;C9JIF9	Acylamino-acid-releasing enzyme	APEH
	1748	ENSG00000273611	0.192867	2.10661	1.7297	unchanged	Q15649;A0A087WY54;Q15649-2	Zinc finger HIT domain-containing protein 3	ZNHIT3
	1749	ENSG00000068137	0.192833	1.83606	1.5166	unchanged	Q7Z736;X6R3U4;Q7Z736-3;Q7Z736-2;Q7Z736-4	Pleckstrin homology domain-containing family H member 3	PLEKHH3
	1750	ENSG00000185627	0.1928	2.54566	2.06752	unchanged	Q9UNM6;A0A087WUL9;Q9UNM6-2;J3KNQ3;E9PL38;H0YD73	26S proteasome non-ATPase regulatory subunit 13	PSMD13
	1751	ENSG00000184349	0.192667	1.85647	1.53254	unchanged	P52803;A0A087X240;D6RDV5	Ephrin-A5	EFNA5
	1752	ENSG00000131116	0.1924	2.34844	1.92003	unchanged	Q96B54;M0QXZ5	Zinc finger protein 428	ZNF428
	1753	ENSG00000012983	0.192233	1.98373	1.63125	unchanged	Q9Y4K4	Mitogen-activated protein kinase kinase kinase kinase 5	MAP4K5
	1754	ENSG00000034713	0.191867	1.68466	1.39486	unchanged	P60520;H3BSM5	Gamma-aminobutyric acid receptor-associated protein-like 2	GABARAPL2
	1755	ENSG00000145348	0.1918	1.3971	1.1618	unchanged	Q8TEA7;Q8TEA7-3;Q8TEA7-2	TBC domain-containing protein kinase-like protein	TBCK
	1756	ENSG00000139726	0.191733	1.48449	1.23292	unchanged	O43583;F8VVL1	Density-regulated protein	DENR
	1757	ENSG00000168522	0.191567	1.94938	1.60461	unchanged	P49354;E9PQP6;P49354-2	Protein farnesyltransferase/geranylgeranyltransferase type-1 subunit alpha	FNTA
	1758	ENSG00000084652	0.191467	1.71349	1.41772	unchanged	P40222	Alpha-taxilin	TXLNA
	1759	ENSG00000166848	0.191433	2.18709	1.79126	unchanged	Q9NYB0;A0A590UJT3	Telomeric repeat-binding factor 2-interacting protein 1	TERF2IP
	1760	ENSG00000138780	0.191333	1.24999	1.0399	unchanged	Q8NEC7;D6R9W2;Q8NEC7-3	Glutathione S-transferase C-terminal domain-containing protein	GSTCD
	1761	ENSG00000167861	0.191333	1.7937	1.48299	unchanged	Q8IV36;Q8IV36-3;Q8IV36-2	Protein HID1	HID1
	1762	ENSG00000157193	0.191267	1.96046	1.61348	unchanged	Q14114-2;Q14114-3;Q14114;A0A590UJF9;A0A590UJ57;A0A590UK45;A0A590UJ98;A0A590UJJ8;Q14114-4;A0A590UK84;A0A590UK97;A0A590UJH5;E9PP15;A0A590UJT0;E9PKG2;A0A590UKB1	Low-density lipoprotein receptor-related protein 8	LRP8
	1763	ENSG00000003147	0.190767	2.35002	1.9213	unchanged	E7ENI6;Q05084;C9IZC7;F8WET5;Q6LCT9;C9J8Y3;C9J3Y4;B9ZVM7;Q6LCR0;E9PDL4;A0A3B3IST8;Q05084-3;Q05084-2	Islet cell autoantigen 1	ICA1;ICAp69
	1764	ENSG00000113312	0.190533	1.84976	1.52738	unchanged	Q99614	Tetratricopeptide repeat protein 1	TTC1
	1765	ENSG00000138071	0.190533	2.21695	1.81562	unchanged	P61160;P61160-2;F5H6T1	Actin-related protein 2	ACTR2
	1766	ENSG00000225691	0.1905	2.56128	2.08014	unchanged	A0A140T9M0;A0A140T9W2;A0A140T9U0;A0A1W2PNZ7;A0A140T9T1	NA	NA
	1767	ENSG00000106305	0.1904	2.5326	2.05851	unchanged	Q13155;A8MU58	Aminoacyl tRNA synthase complex-interacting multifunctional protein 2	AIMP2
	1768	ENSG00000106086	0.190367	2.57367	2.09008	unchanged	Q96JA3;B5MDU3;A0A087X1S6;Q96JA3-3;Q96JA3-2;O95397	Pleckstrin homology domain-containing family A member 8;Putative protein PLEKHA9	PLEKHA8;PLEKHA8P1
	1769	ENSG00000143742	0.190067	1.62427	1.34489	unchanged	P49458;Q6P2S0;Q659G3;E9PE20;P49458-2	Signal recognition particle 9 kDa protein	SRP9;DKFZp564M2223
	1770	ENSG00000196642	0.189867	1.61335	1.33599	unchanged	Q3YEC7;Q3YEC7-2;F2Z2T0	Rab-like protein 6	RABL6
	1771	ENSG00000055163	0.189867	1.82147	1.50472	unchanged	E7EVJ5;Q96F07-2;Q96F07;H7C229;E7EW33	Cytoplasmic FMR1-interacting protein 2	CYFIP2
	1772	ENSG00000100749	0.189833	2.28182	1.86723	unchanged	Q99986	Serine/threonine-protein kinase VRK1	VRK1
	1773	ENSG00000196591	0.1898	1.41372	1.17517	unchanged	Q92769;Q92769-3	Histone deacetylase 2	HDAC2
	1774	ENSG00000170759	0.1898	1.66508	1.3785	unchanged	P33176	Kinesin-1 heavy chain	KIF5B
	1775	ENSG00000196405	0.189467	1.52707	1.26902	unchanged	Q9UI08;Q9UI08-5;Q9UI08-2;H0YJN0;Q9UI08-4;Q9UI08-3;G3V314	Ena/VASP-like protein	EVL
	1776	ENSG00000184900	0.189433	1.56923	1.30221	unchanged	P55854;A8MUA9;A8MU27;P55854-2;Q6EEV6	Small ubiquitin-related modifier 3;Small ubiquitin-related modifier 4	SUMO3;SUMO4
	1777	ENSG00000166266	0.189367	2.13819	1.75247	unchanged	Q93034	Cullin-5	CUL5
	1778	ENSG00000178537	0.1893	1.82526	1.50781	unchanged	O43772;C9JPE1	Mitochondrial carnitine/acylcarnitine carrier protein	SLC25A20
	1779	ENSG00000130703	0.189267	2.04901	1.68505	unchanged	A0A2R8YD49;Q9H1P3-2;A0A2R8YEX0;A0A2R8Y362;A0A2R8YDU7	Oxysterol-binding protein-related protein 2	OSBPL2
	1780	ENSG00000120685	0.189267	2.09809	1.72293	unchanged	Q86XN7;Q86XN7-2	Proline and serine-rich protein 1	PROSER1
	1781	ENSG00000018699	0.189167	2.50494	2.03768	unchanged	Q6P3X3	Tetratricopeptide repeat protein 27	TTC27
	1782	ENSG00000141219	0.1889	1.68878	1.398	unchanged	Q9BSJ5;I3L072;Q9BSJ5-2;Q9BSJ5-3;J3KTJ7	Uncharacterized protein C17orf80	C17orf80
	1783	ENSG00000122824	0.188767	1.38428	1.15111	unchanged	Q8NFP7	Diphosphoinositol polyphosphate phosphohydrolase 3-alpha	NUDT10
	1784	ENSG00000075914	0.188667	1.87987	1.54996	unchanged	Q15024	Exosome complex component RRP42	EXOSC7
	1785	ENSG00000136636	0.1886	1.8293	1.51115	unchanged	Q9Y597;Q9Y597-2	BTB/POZ domain-containing protein KCTD3	KCTD3
	1786	ENSG00000087502	0.188267	1.97829	1.62754	unchanged	Q96RQ1;A0A087WU02;F8W0R1;F8VR88;H0YI50;F8VPA6	Endoplasmic reticulum-Golgi intermediate compartment protein 2	ERGIC2
	1787	ENSG00000131503	0.188133	2.46955	2.01036	unchanged	Q8IWZ3;Q8IWZ3-6;Q8IWZ3-4	Ankyrin repeat and KH domain-containing protein 1	ANKHD1
	1788	ENSG00000111647	0.187667	2.0883	1.71579	unchanged	A0JNW5;A0A0C4DGH6	UHRF1-binding protein 1-like	UHRF1BP1L
	1789	ENSG00000033178	0.187433	2.31351	1.89291	unchanged	A0AVT1;A0AVT1-2	Ubiquitin-like modifier-activating enzyme 6	UBA6
	1790	ENSG00000090372	0.1873	2.46114	2.00397	unchanged	Q9NRL3;Q9NRL3-3;F5GYK2	Striatin-4	STRN4
	1791	ENSG00000138439	0.1872	1.36182	1.13278	unchanged	Q6P1L5	Protein FAM117B	FAM117B
	1792	ENSG00000213066	0.187067	2.09846	1.72315	unchanged	O95684;O95684-2;A0A087WV25	FGFR1 oncogene partner	FGFR1OP
	1793	ENSG00000174744	0.186533	1.92379	1.58415	unchanged	Q9HCU9;E9PJF5;H0YCF7;G5E9I4	Breast cancer metastasis-suppressor 1	BRMS1
	1794	ENSG00000068354	0.186233	2.18411	1.78912	unchanged	Q3MII6;C9JMI8	TBC1 domain family member 25	TBC1D25
	1795	ENSG00000167977	0.1862	1.93022	1.58917	unchanged	Q9NXV2;H3BSS5	BTB/POZ domain-containing protein KCTD5	KCTD5
	1796	ENSG00000162402	0.1861	1.76946	1.46413	unchanged	Q9UPU5	Ubiquitin carboxyl-terminal hydrolase 24	USP24
	1797	ENSG00000144034	0.1861	2.17251	1.77933	unchanged	Q9Y3C4;Q9Y3C4-2;Q9Y3C4-3	EKC/KEOPS complex subunit TPRKB	TPRKB
	1798	ENSG00000143776	0.186033	2.53395	2.0597	unchanged	Q5VT25;Q5VT25-2;A0A0A0MRJ0;Q5VT25-3;Q5VT25-4;Q5VT25-5;Q5VT25-6;A0A0A0MRJ1;H0Y5V1;H0Y7V8	Serine/threonine-protein kinase MRCK alpha;Non-specific serine/threonine protein kinase	CDC42BPA
	1799	ENSG00000111361	0.185733	1.95816	1.61131	unchanged	Q14232;F5H0D0	Translation initiation factor eIF-2B subunit alpha	EIF2B1
	1800	ENSG00000155506	0.185733	2.35329	1.92396	unchanged	Q6PKG0;A0A0B4J210;Q6PKG0-3;E5RH50	La-related protein 1	LARP1
	1801	ENSG00000102218	0.185667	2.04361	1.68096	unchanged	O75695	Protein XRP2	RP2
	1802	ENSG00000182013	0.185467	1.9964	1.64159	unchanged	Q86V59;Q86V59-2	PNMA-like protein 1	PNMAL1
	1803	ENSG00000174917	0.185367	1.40823	1.17109	unchanged	Q5XKP0;A0A140TA86;K7EIR2;A0A140TA84	Protein QIL1	QIL1;C19orf70
	1804	ENSG00000104093	0.185367	1.75124	1.44902	unchanged	Q8TDJ6;Q8TDJ6-3;Q8TDJ6-2	DmX-like protein 2	DMXL2
	1805	ENSG00000101439	0.185167	1.91684	1.5794	unchanged	P01034	Cystatin-C	CST3
	1806	ENSG00000146232	0.185	1.23752	1.0298	unchanged	O00221;Q7LC14	NF-kappa-B inhibitor epsilon	NFKBIE
	1807	ENSG00000053372	0.184767	2.39417	1.95474	unchanged	Q9UKD2	mRNA turnover protein 4 homolog	MRTO4
	1808	ENSG00000143862	0.1846	2.12688	1.74403	unchanged	Q96BM9	ADP-ribosylation factor-like protein 8A	ARL8A
	1809	ENSG00000159873	0.1844	1.85486	1.53117	unchanged	Q8IWD4;Q8IWD4-4;Q8IWD4-3;Q8IWD4-2	Coiled-coil domain-containing protein 117	CCDC117
	1810	ENSG00000164332	0.184333	1.36669	1.13647	unchanged	Q8WVY7	Ubiquitin-like domain-containing CTD phosphatase 1	UBLCP1
	1811	ENSG00000134504	0.184267	1.61311	1.33597	unchanged	A0A2U3U043	NA	NA
	1812	ENSG00000156232	0.184167	1.75118	1.44902	unchanged	Q8TF30	WASP homolog-associated protein with actin, membranes and microtubules	WHAMM
	1813	ENSG00000148634	0.183967	1.33625	1.11224	unchanged	Q5GLZ8;Q5GLZ8-3;Q5GLZ8-2;Q5GLZ8-6	Probable E3 ubiquitin-protein ligase HERC4	HERC4
	1814	ENSG00000144712	0.183933	2.06823	1.70047	unchanged	O75155;O75155-2	Cullin-associated NEDD8-dissociated protein 2	CAND2
	1815	ENSG00000128266	0.183867	1.70136	1.40782	unchanged	P19086	Guanine nucleotide-binding protein G(z) subunit alpha	GNAZ
	1816	ENSG00000065427	0.183833	2.13742	1.75184	unchanged	Q15046;Q15046-2	Lysine--tRNA ligase	KARS
	1817	ENSG00000244462	0.1838	1.44034	1.19562	unchanged	Q9NTZ6	RNA-binding protein 12	RBM12
	1818	ENSG00000109445	0.1837	2.13358	1.74882	unchanged	Q9Y3S2;D6RBR7;D6R9C8;D6R8Y9	Zinc finger protein 330	ZNF330
	1819	ENSG00000143228	0.183667	1.65431	1.36943	unchanged	Q9BZD4;E9PQC4	Kinetochore protein Nuf2	NUF2
	1820	ENSG00000162819	0.1836	2.46044	2.00394	unchanged	Q5VW32;Q5VW32-2;F5GXQ0;Q5VW33	BRO1 domain-containing protein BROX	BROX
	1821	ENSG00000112685	0.183533	2.1038	1.72729	unchanged	Q96KP1	Exocyst complex component 2	EXOC2
	1822	ENSG00000075539	0.183433	1.8628	1.53685	unchanged	O94915;F2Z2S2	Protein furry homolog-like	FRYL
	1823	ENSG00000213420	0.1834	1.67535	1.38729	unchanged	Q8N158	Glypican-2;Secreted glypican-2	GPC2
	1824	ENSG00000159055	0.183333	2.09629	1.72179	unchanged	Q9NYP9	Protein Mis18-alpha	MIS18A
	1825	ENSG00000184634	0.1833	2.6007	2.1095	unchanged	Q93074;Q93074-3;Q93074-2;Q7Z3Z5	Mediator of RNA polymerase II transcription subunit 12	MED12;TNRC11
	1826	ENSG00000204628	0.183233	2.156	1.76639	unchanged	P63244;J3KPE3;H0YAF8;D6RAC2;H0Y8W2;H0YAM7;D6REE5	Guanine nucleotide-binding protein subunit beta-2-like 1;Guanine nucleotide-binding protein subunit beta-2-like 1, N-terminally processed	GNB2L1
	1827	ENSG00000100897	0.183067	1.84444	1.52312	unchanged	Q8TEB1;Q8TEB1-2;H0YN92;H0YM86	DDB1- and CUL4-associated factor 11	DCAF11
	1828	ENSG00000105248	0.182733	1.5229	1.26556	unchanged	Q9BW85;M0R2S3	Coiled-coil domain-containing protein 94	CCDC94
	1829	ENSG00000168488	0.1827	1.51413	1.25781	unchanged	Q8WWM7;Q8WWM7-6;Q8WWM7-8;Q8WWM7-5;Q8WWM7-4;Q8WWM7-9;Q8WWM7-2;Q8WWM7-3;H3BUF6	Ataxin-2-like protein	ATXN2L
	1830	ENSG00000143549	0.182633	1.60565	1.33029	unchanged	P06753-2;P06753-3;A0A087WWU8;P06753-5;P06753-4;D6R904	NA	TPM3
	1831	ENSG00000123388	0.1826	1.47082	1.22135	unchanged	O43248;J3KMZ0	Homeobox protein Hox-C11	HOXC11
	1832	ENSG00000183207	0.182433	1.66502	1.3785	unchanged	Q9Y230	RuvB-like 2	RUVBL2
	1833	ENSG00000158195	0.182367	2.1313	1.74709	unchanged	Q9Y6W5;Q9Y6W5-2	Wiskott-Aldrich syndrome protein family member 2	WASF2
	1834	ENSG00000141959	0.182167	1.85779	1.53362	unchanged	P17858;P17858-2	ATP-dependent 6-phosphofructokinase, liver type	PFKL
	1835	ENSG00000164916	0.182067	2.58108	2.09474	unchanged	P85037;P85037-2	Forkhead box protein K1	FOXK1
	1836	ENSG00000128513	0.181867	2.08081	1.70976	unchanged	Q9NUX5;A0A590UJF2;B7Z7M5;Q9NUX5-2;A0A590UJP0;Q5MJ34;A0A590UJF7;Q5MJ35;A8MTK3	Protection of telomeres protein 1	POT1
	1837	ENSG00000108774	0.181833	2.14539	1.75829	unchanged	P51148;P51148-2;K7ENY4	Ras-related protein Rab-5C	RAB5C
	1838	ENSG00000115514	0.1818	1.67768	1.38919	unchanged	O14530;F8WCJ3;B8ZZX4;F8WBV5;G3XAJ4	Thioredoxin domain-containing protein 9	TXNDC9
	1839	ENSG00000170266	0.181767	2.17941	1.78511	unchanged	P16278;P16278-3;E7EQ29;P16278-2	Beta-galactosidase	GLB1
	1840	ENSG00000138375	0.1817	1.29909	1.07995	unchanged	Q9NZC9;H7BYI2	SWI/SNF-related matrix-associated actin-dependent regulator of chromatin subfamily A-like protein 1	SMARCAL1
	1841	ENSG00000031698	0.1816	1.74321	1.44207	unchanged	P49591;Q5T5C7	Serine--tRNA ligase, cytoplasmic	SARS
	1842	ENSG00000139083	0.181433	1.86654	1.53963	unchanged	P41212	Transcription factor ETV6	ETV6
	1843	ENSG00000144791	0.1814	1.99549	1.6409	unchanged	Q9UGP4;C9JRJ5	LIM domain-containing protein 1	LIMD1
	1844	ENSG00000081721	0.181367	1.37706	1.1451	unchanged	Q9UNI6;V9GY92	Dual specificity protein phosphatase 12	DUSP12
	1845	ENSG00000047579	0.1805	1.26277	1.05012	unchanged	Q96EV8;A6NFV8;Q96EV8-2;D6RCT8	Dysbindin	DTNBP1
	1846	ENSG00000079739	0.1805	1.55416	1.29087	unchanged	P36871;A0A3B3ITK7;P36871-2;P36871-3	Phosphoglucomutase-1	PGM1
	1847	ENSG00000115687	0.180433	1.80932	1.49537	unchanged	Q96RG2;Q96RG2-2;Q96RG2-4	PAS domain-containing serine/threonine-protein kinase	PASK
	1848	ENSG00000153391	0.180333	2.26566	1.85421	unchanged	Q6PI98;M0R3E2;K7EIY8;Q6PI98-4;Q6PI98-3	INO80 complex subunit C	INO80C
	1849	ENSG00000144635	0.1802	1.81953	1.50337	unchanged	Q9Y6G9;E9PHI6	Cytoplasmic dynein 1 light intermediate chain 1	DYNC1LI1
	1850	ENSG00000153944	0.180167	1.85069	1.52807	unchanged	Q96DH6;Q96DH6-2;B4DHE8;J3KTC1;B4DM51;Q96DH6-3	RNA-binding protein Musashi homolog 2	MSI2
	1851	ENSG00000188986	0.180067	1.79491	1.48397	unchanged	Q8WX92-2;A0A5H1ZRP4;Q8WX92	Negative elongation factor B	NELFB
	1852	ENSG00000116489	0.179933	2.14986	1.76204	unchanged	P52907	F-actin-capping protein subunit alpha-1	CAPZA1
	1853	ENSG00000223496	0.1799	2.09672	1.72208	unchanged	Q5RKV6	Exosome complex component MTR3	EXOSC6
	1854	ENSG00000103197	0.179867	1.38911	1.15498	unchanged	P49815;X5D2U8;A0A2R8YGU4;P49815-3;A0A2R8YDZ2;A0A2R8Y7X5;A0A2R8YDR3;A0A2R8Y7C8;P49815-5;P49815-2;A0A2R8YGD6;A0A2R8Y5F1;P49815-4;H3BMQ0;P49815-7;P49815-6;A0A2R8Y6C9	Tuberin	TSC2
	1855	ENSG00000121570	0.179667	1.20981	1.0076	unchanged	Q7L190	Developmental pluripotency-associated protein 4	DPPA4
	1856	ENSG00000162924	0.1796	1.85154	1.52844	unchanged	Q04864;Q04864-2	Proto-oncogene c-Rel	REL
	1857	ENSG00000158467	0.1795	1.77165	1.46586	unchanged	Q96HN2;Q96HN2-2;H0Y8B3;Q96HN2-4;Q96HN2-3	Putative adenosylhomocysteinase 3;Adenosylhomocysteinase	AHCYL2
	1858	ENSG00000148334	0.179433	1.53331	1.27413	unchanged	Q9H7Z7;A6NHH0;X6RJ95	Prostaglandin E synthase 2;Prostaglandin E synthase 2 truncated form	PTGES2
	1859	ENSG00000114098	0.1794	1.99687	1.64193	unchanged	Q8IUR7;Q8IUR7-7;Q8IUR7-8;G5E9V6	Armadillo repeat-containing protein 8	ARMC8
	1860	ENSG00000172661	0.179233	2.38344	1.94663	unchanged	A0A0A0MR88;A0A096LPC5;Q9Y4E1;J3KP36;Q9Y4E1-3;Q9Y4E1-6;Q9Y4E1-2;Q9Y4E1-1;Q9Y4E1-5	WASH complex subunit FAM21C	FAM21C
	1861	ENSG00000070761	0.1792	1.70083	1.40751	unchanged	Q9Y6A4	Cilia- and flagella-associated protein 20	CFAP20
	1862	ENSG00000139719	0.178967	2.28819	1.87198	unchanged	Q96AX1;A0A2R8YF87;H3BMM5	Vacuolar protein sorting-associated protein 33A	VPS33A
	1863	ENSG00000103326	0.178933	1.65255	1.36809	unchanged	O75808;A0A1B0GVE3;O75808-2	Calpain-15	CAPN15
	1864	ENSG00000168393	0.178867	1.81078	1.49659	unchanged	P23919;P23919-2;H7BZ20	Thymidylate kinase	DTYMK
	1865	ENSG00000177885	0.178867	2.32939	1.90503	unchanged	P62993;P62993-2	Growth factor receptor-bound protein 2	GRB2
	1866	ENSG00000177479	0.1787	1.3327	1.10916	unchanged	O95376	E3 ubiquitin-protein ligase ARIH2	ARIH2
	1867	ENSG00000144895	0.1787	1.9178	1.57999	unchanged	Q9BY44;Q9BY44-3;F8WAE5;Q9BY44-4;Q9BY44-2	Eukaryotic translation initiation factor 2A;Eukaryotic translation initiation factor 2A, N-terminally processed	EIF2A
	1868	ENSG00000143774	0.1787	1.99288	1.63909	unchanged	Q16774;B1ANH5;B1ANH0;B1ANG9;B1ANH6;B1ANH2;Q16774-2;B1ANH3;Q16774-3	Guanylate kinase	GUK1
	1869	ENSG00000158234	0.1786	2.06609	1.69897	unchanged	Q9NVQ4;Q9NVQ4-3;Q9NVQ4-2;C9JDZ2	Fas apoptotic inhibitory molecule 1	FAIM
	1870	ENSG00000111727	0.178533	2.17798	1.78383	unchanged	Q9Y5Z7	Host cell factor 2	HCFC2
	1871	ENSG00000130311	0.1785	1.95132	1.60547	unchanged	Q9BW61	DET1- and DDB1-associated protein 1	DDA1
	1872	ENSG00000255529	0.178433	1.76458	1.45993	unchanged	P0CAP2;Q9BZD3;P0CAP2-3;H8Y6P7;P0CAP2-2	DNA-directed RNA polymerase II subunit GRINL1A;Putative GRINL1B complex locus protein 2	POLR2M;GCOM2;GCOM1
	1873	ENSG00000157916	0.178333	2.40276	1.96068	unchanged	O15258;Q5T092;A0A0A0MR06;Q5T091	Protein RER1	RER1
	1874	ENSG00000198952	0.1783	1.89854	1.56537	unchanged	Q9UPR3	Protein SMG5	SMG5
	1875	ENSG00000103642	0.178133	2.11036	1.73187	unchanged	P83111;P83111-2	Serine beta-lactamase-like protein LACTB, mitochondrial	LACTB
	1876	ENSG00000136492	0.1781	1.96983	1.62084	unchanged	Q9BX63;Q9BX63-2	Fanconi anemia group J protein	BRIP1
	1877	ENSG00000029639	0.178	2.12344	1.74164	unchanged	Q8WVM0	Dimethyladenosine transferase 1, mitochondrial	TFB1M
	1878	ENSG00000129484	0.1774	1.5676	1.30089	unchanged	Q9UGN5;G3V167;Q9UGN5-2	Poly [ADP-ribose] polymerase 2	PARP2
	1879	ENSG00000143457	0.1774	1.57099	1.30355	unchanged	Q9H4A5;Q5T5I6;Q9H4A5-2	Golgi phosphoprotein 3-like	GOLPH3L
	1880	ENSG00000162413	0.177267	1.25908	1.04735	unchanged	Q9UJP4;Q9UJP4-2	Kelch-like protein 21	KLHL21
	1881	ENSG00000111669	0.177233	2.08133	1.71002	unchanged	P60174;P60174-1;P60174-4	Triosephosphate isomerase	TPI1
	1882	ENSG00000179051	0.177	1.73304	1.4338	unchanged	Q9P258	Protein RCC2	RCC2
	1883	ENSG00000136104	0.176733	1.67909	1.3905	unchanged	A0A2R8Y4S2	NA	NA
	1884	ENSG00000117868	0.176733	2.46299	2.00547	unchanged	H7BXI1;A0FGR8-2;A0A499FIX8;A0FGR8-6;A0FGR8;A0A087WXU3	Extended synaptotagmin-2	ESYT2
	1885	ENSG00000160746	0.1767	2.37893	1.94366	unchanged	Q9NW15;Q9NW15-2;Q9NW15-5;C9JA49;C9IYD3;C9JQC9;C9JPY2;C9J670;C9IZD0	Anoctamin-10	ANO10
	1886	ENSG00000176903	0.176633	2.43337	1.98468	unchanged	Q8ND90	Paraneoplastic antigen Ma1	PNMA1
	1887	ENSG00000104964	0.176567	2.1159	1.7363	unchanged	Q08117;Q08117-2;K7EQH5;K7ELE3	Amino-terminal enhancer of split	AES
	1888	ENSG00000076003	0.176533	1.89429	1.56236	unchanged	Q14566	DNA replication licensing factor MCM6	MCM6
	1889	ENSG00000080200	0.176233	2.29842	1.88086	unchanged	Q68DQ2	Very large A-kinase anchor protein	CRYBG3
	1890	ENSG00000103657	0.176133	1.68356	1.39409	unchanged	Q15751	Probable E3 ubiquitin-protein ligase HERC1	HERC1
	1891	ENSG00000198218	0.175933	1.43253	1.18962	unchanged	Q2TAL8	Glutamine-rich protein 1	QRICH1
	1892	ENSG00000164244	0.175833	1.70205	1.40817	unchanged	Q96M27;Q96M27-3;Q96M27-2;Q96M27-5;Q96M27-4	Protein PRRC1	PRRC1
	1893	ENSG00000047230	0.175733	2.09789	1.72293	unchanged	Q9NRF8	CTP synthase 2	CTPS2
	1894	ENSG00000118420	0.1756	1.69667	1.4039	unchanged	Q7Z6J8;D6RHY9;D6RD24	E3 ubiquitin-protein ligase E3D	UBE3D
	1895	ENSG00000166313	0.1753	1.52361	1.26614	unchanged	O00213;A0A075B7G8;J3KPL8;O00213-2;A0A087X0V7;A0A087WYH9;O00213-4;O00213-6;O00213-3;O00213-5;V9GY97	Amyloid beta A4 precursor protein-binding family B member 1	APBB1
	1896	ENSG00000134086	0.175267	1.89061	1.55947	unchanged	P40337;P40337-3;P40337-2	Von Hippel-Lindau disease tumor suppressor	VHL
	1897	ENSG00000169718	0.1752	2.05321	1.6886	unchanged	Q6P1R4;J3QLE4;H0YGW8	tRNA-dihydrouridine(16/17) synthase [NAD(P)(+)]-like	DUS1L
	1898	ENSG00000047249	0.1752	2.11877	1.73875	unchanged	Q9UI12;Q9UI12-2;G3V126	V-type proton ATPase subunit H	ATP6V1H
	1899	ENSG00000130702	0.174767	1.94161	1.59862	unchanged	O15230	Laminin subunit alpha-5	LAMA5
	1900	ENSG00000094804	0.174633	1.89171	1.56036	unchanged	Q99741	Cell division control protein 6 homolog	CDC6
	1901	ENSG00000183955	0.1746	1.8749	1.54624	unchanged	Q9NQR1;A0A0C4DFR3;Q9NQR1-2;C9JKQ0	N-lysine methyltransferase SETD8	SETD8
	1902	ENSG00000172731	0.174567	2.28001	1.866	unchanged	Q8TCA0;X6RK58;A0A0A0MS58;Q8TCA0-3	Leucine-rich repeat-containing protein 20	LRRC20
	1903	ENSG00000110801	0.174433	2.08174	1.7103	unchanged	O00233;J3KN29;F5H5V4;F5GX23;O00233-2;F5H169	26S proteasome non-ATPase regulatory subunit 9	PSMD9
	1904	ENSG00000151466	0.1744	2.21297	1.81235	unchanged	Q96NL6;D6RBP0;A0A494C0G8;Q96NL6-2	Sodium channel and clathrin linker 1	SCLT1
	1905	ENSG00000163808	0.174333	1.77567	1.4692	unchanged	Q9NS87;Q9NS87-2;Q9NS87-4	Kinesin-like protein KIF15	KIF15
	1906	ENSG00000100034	0.174	1.41199	1.17398	unchanged	P49593;B5MCT7;P49593-2	Protein phosphatase 1F	PPM1F
	1907	ENSG00000221823	0.173933	1.27068	1.05692	unchanged	P63098;F6U1T9;D3YTA9;H7BYZ3	Calcineurin subunit B type 1	PPP3R1
	1908	ENSG00000100324	0.173433	1.97884	1.62797	unchanged	Q15750;Q15750-2	TGF-beta-activated kinase 1 and MAP3K7-binding protein 1	TAB1
	1909	ENSG00000126953	0.173367	1.22341	1.01841	unchanged	O60220	Mitochondrial import inner membrane translocase subunit Tim8 A	TIMM8A
	1910	ENSG00000198793	0.173333	1.87362	1.54539	unchanged	P42345	Serine/threonine-protein kinase mTOR	MTOR
	1911	ENSG00000189046	0.172833	1.82117	1.50454	unchanged	Q6NS38;S4R3T5;F5H5X2;F5GZZ0;Q6NS38-2	Alpha-ketoglutarate-dependent dioxygenase alkB homolog 2	ALKBH2
	1912	ENSG00000132330	0.1728	1.22432	1.01917	unchanged	Q96I15;A0A0A0MQU4;Q96I15-2	Selenocysteine lyase	SCLY
	1913	ENSG00000164329	0.172733	1.35282	1.12502	unchanged	Q6PIY7;D6RAF2;Q6PIY7-2	Poly(A) RNA polymerase GLD2	PAPD4
	1914	ENSG00000100852	0.1727	1.35419	1.1262	unchanged	Q13017;A0A0A0MSK6;Q13017-2	Rho GTPase-activating protein 5	ARHGAP5
	1915	ENSG00000105393	0.1726	2.29726	1.88032	unchanged	Q9NWV8;M0R0I0;J3KQS6;M0R3F4;M0R2A4;M0R2K3;M0R193;M0R2I2;Q9NWV8-3;M0QXG9	BRISC and BRCA1-A complex member 1	BABAM1
	1916	ENSG00000159352	0.1725	2.05571	1.69071	unchanged	P55036;P55036-2;A6PVX3	26S proteasome non-ATPase regulatory subunit 4	PSMD4
	1917	ENSG00000005339	0.1725	2.15358	1.76456	unchanged	Q92793;Q92793-2;I3L466	CREB-binding protein	CREBBP
	1918	ENSG00000174306	0.172433	1.44286	1.19758	unchanged	Q9H4I2;H0Y6F5;Q9H4I2-2	Zinc fingers and homeoboxes protein 3	ZHX3
	1919	ENSG00000168118	0.172333	1.91842	1.58037	unchanged	P20338	Ras-related protein Rab-4A	RAB4A
	1920	ENSG00000113615	0.1723	1.59301	1.32117	unchanged	O95486	Protein transport protein Sec24A	SEC24A
	1921	ENSG00000171262	0.1723	2.13172	1.74723	unchanged	Q52LJ0;Q52LJ0-1	Protein FAM98B	FAM98B
	1922	ENSG00000069345	0.1722	1.66121	1.37524	unchanged	O60884	DnaJ homolog subfamily A member 2	DNAJA2
	1923	ENSG00000198356	0.171967	2.0836	1.71189	unchanged	O43681;A0A087WXS7	ATPase ASNA1	ASNA1
	1924	ENSG00000122545	0.171733	1.58219	1.31277	unchanged	Q16181-2	Septin-7	SEPTIN7
	1925	ENSG00000179526	0.171433	1.84098	1.52013	unchanged	Q9H0F6;Q9H0F6-2	Sharpin	SHARPIN
	1926	ENSG00000123607	0.1714	1.24201	1.03348	unchanged	Q7Z4L5;A0A494C0N4	Tetratricopeptide repeat protein 21B	TTC21B
	1927	ENSG00000274070	0.1713	1.81431	1.49931	unchanged	A6NHX0;Q8WTX7;F2Z3I9;F2Z2C1;F8WD52;B7WPJ3	GATS-like protein 2;GATS-like protein 3	GATSL2;GATSL3
	1928	ENSG00000072062	0.171267	1.66144	1.37525	unchanged	P17612;P17612-2;Q15136;K7ERP6	cAMP-dependent protein kinase catalytic subunit alpha	PRKACA;KIN27
	1929	ENSG00000157778	0.171033	1.28687	1.07007	unchanged	Q9BT73	Proteasome assembly chaperone 3	PSMG3
	1930	ENSG00000135778	0.170967	1.83453	1.51567	unchanged	Q9BSD7;Q5TDF0	Cancer-related nucleoside-triphosphatase	NTPCR
	1931	ENSG00000198492	0.170833	2.00458	1.64826	unchanged	Q9Y5A9;Q9Y5A9-2	YTH domain-containing family protein 2	YTHDF2
	1932	ENSG00000189337	0.170833	2.36105	1.93037	unchanged	Q674X7;Q674X7-3;A0A1B0GWK2;Q674X7-5;Q674X7-2;B0QYQ6;Q674X7-4	Kazrin	KAZN
	1933	ENSG00000152291	0.170733	1.93905	1.59643	unchanged	O43493;A0A5F9UY30;A0A5H1ZRP2;O43493-5;O43493-3;O43493-7;O43493-4;O43493-6	Trans-Golgi network integral membrane protein 2	TGOLN2
	1934	ENSG00000116337	0.1706	1.29225	1.07414	unchanged	Q01433;Q01433-2;A0A5F9UK94;H0Y360;Q01433-5;Q01433-3;Q01433-4;A0A590UK85;A0A590UJY6	AMP deaminase 2	AMPD2
	1935	ENSG00000125868	0.1703	1.55036	1.28758	unchanged	P60981;P60981-2;F6RFD5	Destrin	DSTN
	1936	ENSG00000102921	0.170167	1.2012	1.00007	unchanged	O75113	NEDD4-binding protein 1	N4BP1
	1937	ENSG00000126457	0.169833	2.284	1.86868	unchanged	Q99873-3;Q99873;Q99873-2;E9PKG1;Q99873-5;E9PIX6;E9PQ98;H0YDE4	Protein arginine N-methyltransferase 1	PRMT1
	1938	ENSG00000055609	0.169767	2.0291	1.66932	unchanged	Q8NEZ4;Q8NEZ4-3;Q8NEZ4-2;H7BY37	Histone-lysine N-methyltransferase 2C	KMT2C
	1939	ENSG00000085978	0.169667	1.57303	1.30496	unchanged	Q676U5;Q676U5-2;E7EVC7;Q676U5-3;Q676U5-4;Q676U5-5	Autophagy-related protein 16-1	ATG16L1
	1940	ENSG00000107021	0.169533	1.45395	1.20727	unchanged	Q9NVG8;Q9NVG8-2	TBC1 domain family member 13	TBC1D13
	1941	ENSG00000198298	0.169333	1.3491	1.12205	unchanged	Q8NCK3;Q8NCK3-2;C9JV60	Zinc finger protein 485	ZNF485
	1942	ENSG00000067248	0.169267	1.68568	1.39544	unchanged	Q7Z478;A0A087WYN9	ATP-dependent RNA helicase DHX29	DHX29
	1943	ENSG00000181789	0.1685	1.61005	1.33327	unchanged	Q9Y678	Coatomer subunit gamma-1	COPG1
	1944	ENSG00000108861	0.1683	1.23766	1.02985	unchanged	P51452;P51452-2;K7ES89	Dual specificity protein phosphatase 3	DUSP3
	1945	ENSG00000088808	0.1682	1.93448	1.59248	unchanged	Q96KQ4;A0A3B3ISJ2	Apoptosis-stimulating of p53 protein 1	PPP1R13B
	1946	ENSG00000140280	0.1681	2.04	1.67786	unchanged	Q8IV50	LysM and putative peptidoglycan-binding domain-containing protein 2	LYSMD2
	1947	ENSG00000076201	0.1679	2.01407	1.65645	unchanged	Q9H3S7	Tyrosine-protein phosphatase non-receptor type 23	PTPN23
	1948	ENSG00000143379	0.1679	2.12639	1.74381	unchanged	Q15047;Q15047-3;E9PRF4	Histone-lysine N-methyltransferase SETDB1	SETDB1
	1949	ENSG00000084092	0.1678	1.92095	1.58241	unchanged	Q8NC60	Nitric oxide-associated protein 1	NOA1
	1950	ENSG00000155827	0.167767	2.36634	1.93469	unchanged	Q5VTR2	E3 ubiquitin-protein ligase BRE1A	RNF20
	1951	ENSG00000111640	0.1675	1.42134	1.18108	unchanged	P04406;E7EUT5	Glyceraldehyde-3-phosphate dehydrogenase	GAPDH
	1952	ENSG00000204120	0.167433	2.19407	1.79669	unchanged	Q6Y7W6;Q6Y7W6-4;Q6Y7W6-5;I1E4Y6;Q6Y7W6-3;E7ESB6	PERQ amino acid-rich with GYF domain-containing protein 2	GIGYF2
	1953	ENSG00000130695	0.1674	1.81274	1.49809	unchanged	Q6P2H3;Q6P2H3-4;Q6P2H3-2;H7BZW2	Centrosomal protein of 85 kDa	CEP85
	1954	ENSG00000021574	0.166867	1.44932	1.20344	unchanged	Q9UBP0;A0A2R8Y4I8;A0A2U3TZR0;Q9UBP0-4;Q9UBP0-3;Q9UBP0-2;A0A2R8YFW8;A0A2R8YCL5;A0A2R8YGN6;A0A2R8Y7K2;A0A2R8Y481;A0A2R8Y5N9	Spastin	SPAST
	1955	ENSG00000139350	0.166833	2.13022	1.74641	unchanged	Q8NHV4;Q8NHV4-3;Q8NHV4-2	Protein NEDD1	NEDD1
	1956	ENSG00000165527	0.166767	1.92293	1.58368	unchanged	P62330	ADP-ribosylation factor 6	ARF6
	1957	ENSG00000100083	0.1666	1.51034	1.25483	unchanged	Q9UJY5;Q9UJY5-2;Q9UJY5-4;Q9UJY5-6;Q9UJY5-3;B0QYR6	ADP-ribosylation factor-binding protein GGA1	GGA1
	1958	ENSG00000138413	0.1664	1.46199	1.21402	unchanged	O75874	Isocitrate dehydrogenase [NADP] cytoplasmic	IDH1
	1959	ENSG00000101109	0.1664	1.4643	1.21563	unchanged	Q13043;Q13043-2;F5H5B4	Serine/threonine-protein kinase 4;Serine/threonine-protein kinase 4 37kDa subunit;Serine/threonine-protein kinase 4 18kDa subunit	STK4
	1960	ENSG00000110367	0.1661	2.10033	1.72476	unchanged	P26196	Probable ATP-dependent RNA helicase DDX6	DDX6
	1961	ENSG00000082438	0.165833	1.80734	1.49398	unchanged	A0A590PXD8;Q53SF7-2;A0A0X1KG75;Q53SF7;A0A0D9SG04;Q53SF7-3	Cordon-bleu protein-like 1	COBLL1
	1962	ENSG00000125351	0.165733	1.97451	1.62464	unchanged	Q9BZI7;Q9BZI7-2;A0A087WYC8	Regulator of nonsense transcripts 3B	UPF3B
	1963	ENSG00000095139	0.1657	1.57901	1.31011	unchanged	P48444;B0YIW6;P48444-2	Coatomer subunit delta	ARCN1
	1964	ENSG00000164187	0.1656	1.60941	1.3329	unchanged	Q68DH5	LMBR1 domain-containing protein 2	LMBRD2
	1965	ENSG00000070610	0.1654	2.1365	1.75105	unchanged	Q9HCG7;Q9HCG7-2;Q9HCG7-3	Non-lysosomal glucosylceramidase	GBA2
	1966	ENSG00000048052	0.1652	1.90816	1.57262	unchanged	B7Z3P7;B5MCF1;Q9UKV0-9;Q9UKV0-8;Q9UKV0-3;Q9UKV0-11;Q9UKV0-10	Histone deacetylase 9	HDAC9
	1967	ENSG00000164252	0.1652	2.16033	1.76951	unchanged	Q8N302;A0A2R8YFF1;Q8N302-3	Angiogenic factor with G patch and FHA domains 1	AGGF1
	1968	ENSG00000124496	0.165133	1.70015	1.40694	unchanged	Q96PN7;Q05GC8;Q96PN7-4;Q96PN7-5;Q96PN7-2;Q96PN7-3	Transcriptional-regulating factor 1	TRERF1;BCAR2
	1969	ENSG00000130725	0.165067	1.49188	1.23921	unchanged	P61081	NEDD8-conjugating enzyme Ubc12	UBE2M
	1970	ENSG00000135624	0.164867	1.4279	1.1859	unchanged	Q99832;Q99832-3;Q99832-4;Q99832-2	T-complex protein 1 subunit eta	CCT7
	1971	ENSG00000119041	0.1648	1.99132	1.63765	unchanged	Q9Y5Q9;A0A494C1S7;Q9Y5Q9-2	General transcription factor 3C polypeptide 3	GTF3C3
	1972	ENSG00000095787	0.1645	1.53709	1.27679	unchanged	Q9BTA9;Q9BTA9-2	WW domain-containing adapter protein with coiled-coil	WAC
	1973	ENSG00000090989	0.1642	1.92685	1.58658	unchanged	Q9NV70;Q9NV70-2	Exocyst complex component 1	EXOC1
	1974	ENSG00000135387	0.163967	1.62726	1.34702	unchanged	Q14444;Q14444-2;G3V153;E9PLA9	Caprin-1	CAPRIN1
	1975	ENSG00000163807	0.163933	1.70947	1.41459	unchanged	Q96AT1	Uncharacterized protein KIAA1143	KIAA1143
	1976	ENSG00000203705	0.163867	1.51328	1.25726	unchanged	Q17R31;Q17R31-2;Q17R31-3;Q17R31-4;Q17R31-5	Putative deoxyribonuclease TATDN3	TATDN3
	1977	ENSG00000166508	0.1637	2.18495	1.7894	unchanged	P33993;P33993-3;P33993-2	DNA replication licensing factor MCM7	MCM7
	1978	ENSG00000092010	0.163633	1.34059	1.11572	unchanged	Q06323;Q06323-2;Q06323-3	Proteasome activator complex subunit 1	PSME1
	1979	ENSG00000205302	0.163467	1.49706	1.24367	unchanged	O60749;O60749-2	Sorting nexin-2	SNX2
	1980	ENSG00000146143	0.163367	1.37231	1.14135	unchanged	P49643;A0A5F9ZHU7	DNA primase large subunit	PRIM2
	1981	ENSG00000135482	0.163333	1.72559	1.4272	unchanged	Q96K80	Zinc finger CCCH domain-containing protein 10	ZC3H10
	1982	ENSG00000130349	0.163333	2.09379	1.71994	unchanged	Q9P0P8;A0A0D9SEI0	Uncharacterized protein C6orf203	C6orf203
	1983	ENSG00000165156	0.1633	1.43378	1.19038	unchanged	Q9UKY1	Zinc fingers and homeoboxes protein 1	ZHX1
	1984	ENSG00000119787	0.163167	1.54715	1.285	unchanged	Q8NHH9;Q8NHH9-5;Q8NHH9-2;Q8NHH9-4;Q8NHH9-3;B5MCN0	Atlastin-2	ATL2
	1985	ENSG00000080839	0.162933	1.24039	1.03213	unchanged	P28749;P28749-2;H0YE05	Retinoblastoma-like protein 1	RBL1
	1986	ENSG00000126214	0.162667	1.49961	1.24562	unchanged	Q07866-3	Kinesin light chain 1	KLC1
	1987	ENSG00000258366	0.162467	1.37919	1.1468	unchanged	Q9NZ71;Q9NZ71-8;Q9NZ71-4;Q9NZ71-7;Q9NZ71-6;Q9NZ71-2;D6RA96;X6R5I7;Q9NZ71-9	Regulator of telomere elongation helicase 1	RTEL1;RTEL1-TNFRSF6B
	1988	ENSG00000134759	0.162233	1.86051	1.53539	unchanged	Q6IA86;Q6IA86-7;Q6IA86-3;Q6IA86-6;Q6IA86-5;Q6IA86-2;Q6IA86-4	Elongator complex protein 2	ELP2
	1989	ENSG00000075391	0.162133	1.22426	1.01917	unchanged	Q9UJF2-2;Q9UJF2	Ras GTPase-activating protein nGAP	RASAL2
	1990	ENSG00000092621	0.162033	2.19009	1.79356	unchanged	O43175;A0A286YF22;A0A2C9F2M7;A0A286YFL2;A0A286YFA2;A0A286YFM8	D-3-phosphoglycerate dehydrogenase	PHGDH
	1991	ENSG00000136231	0.162	1.98036	1.62911	unchanged	O00425;O00425-2	Insulin-like growth factor 2 mRNA-binding protein 3	IGF2BP3
	1992	ENSG00000157954	0.161967	1.59987	1.32623	unchanged	Q9Y4P8;Q9Y4P8-4;Q9Y4P8-3;Q9Y4P8-2;Q9Y4P8-6	WD repeat domain phosphoinositide-interacting protein 2	WIPI2
	1993	ENSG00000115504	0.161567	1.49916	1.24528	unchanged	Q8NDI1;Q8NDI1-3;Q8NDI1-2	EH domain-binding protein 1	EHBP1
	1994	ENSG00000116679	0.1615	1.41201	1.17398	unchanged	Q9Y6Y0	Influenza virus NS1A-binding protein	IVNS1ABP
	1995	ENSG00000152684	0.161233	2.04686	1.68368	unchanged	Q9BRX2	Protein pelota homolog	PELO
	1996	ENSG00000099954	0.160967	1.77424	1.468	unchanged	Q9BXF3;A0A087WT21;Q9BXF3-3;B7WPH3;A0A0R4J2E1;Q9BXF3-2	Cat eye syndrome critical region protein 2	CECR2
	1997	ENSG00000132155	0.160933	1.85961	1.53485	unchanged	P04049;P04049-2;H7C155	RAF proto-oncogene serine/threonine-protein kinase	RAF1
	1998	ENSG00000154930	0.160467	1.47008	1.22071	unchanged	Q9NUB1;Q9NUB1-2;Q9NUB1-3;Q9NUB1-4	Acetyl-coenzyme A synthetase 2-like, mitochondrial	ACSS1
	1999	ENSG00000105568	0.160433	1.79801	1.4866	unchanged	P30153;B3KQV6	Serine/threonine-protein phosphatase 2A 65 kDa regulatory subunit A alpha isoform	PPP2R1A
[truncated: 2,853 more rows]

## Sheet: 3B
		gene_id	lfcSE_RNA	stat_RNA	pvalue_RNA	padj_RNA	log2FC_RNA_shrunk	gene_name_DB	group
	514	ENSG00000106034	0.475992	-4.23756	2.25961085582654e-05	0.0010398	-1.32794	CPED1	down
	515	ENSG00000170175	0.469038	-4.36467	1.27311914825382e-05	0.000643043	-1.36267	CHRNB1	down
	516	ENSG00000129152	0.3596	-5.77981	7.4784126999553e-09	8.33629138052679e-07	-1.60456	MYOD1	down
	517	ENSG00000214456	0.48342	-4.38153	1.17847365466441e-05	0.000603196	-1.3828	PLIN5	down
	518	ENSG00000137868	0.475887	-4.6125	3.9785511967153e-06	0.000236146	-1.44898	STRA6	down
	519	ENSG00000157349	0.275502	-7.98728	1.37948947829864e-15	3.88346574751042e-13	-1.87417	DDX19B	down
	520	ENSG00000251381	0.28833	-7.75872	8.57913602090384e-15	2.28097778955781e-12	-1.87968	LINC00958	down
	521	ENSG00000107954	0.35428	-6.38868	1.67327467346071e-10	2.28796407671846e-08	-1.75738	NEURL1	down
	522	ENSG00000173114	0.608929	-3.7308	0.000190871	0.00638783	-1.2327	LRRN3	down
	523	ENSG00000107742	0.254417	-8.92965	4.27351060967849e-19	1.66954721634848e-16	-1.97881	SPOCK2	down
	524	ENSG00000174950	0.587389	-3.8786	0.000105059	0.00380899	-1.27792	CD164L2	down
	525	ENSG00000184697	0.310215	-7.36936	1.7145443138153e-13	4.00262460967882e-11	-1.86988	CLDN6	down
	526	ENSG00000069696	0.577543	-4.04451	5.2432079184272e-05	0.00211307	-1.31642	DRD4	down
	527	ENSG00000260428	0.631924	-3.70121	0.00021457	0.0070576	-1.22814	SCX	down
	528	ENSG00000229437	0.582415	-4.03267	5.51457411274969e-05	0.00218562	-1.31884	NA	down
	529	ENSG00000059804	0.334842	-7.03521	1.98954431171624e-12	3.73390654501805e-10	-1.87536	SLC2A3	down
	530	ENSG00000182636	0.189924	-12.5098	6.599654993208e-36	6.64932608078846e-33	-2.19382	NDN	down
	531	ENSG00000146047	0.563069	-4.28002	1.8687913559515e-05	0.000874677	-1.39269	H2BC1	down
	532	ENSG00000167434	0.454971	-5.5733	2.49953566604367e-08	2.45377493615764e-06	-1.72873	CA4	down
	533	ENSG00000275291	0.361154	-7.09679	1.27688380281555e-12	2.54618610805189e-10	-1.97225	LOC124904624	down
	534	ENSG00000164125	0.241064	-10.7596	5.34027781959194e-27	3.19465432188901e-24	-2.28969	GASK1B	down
	535	ENSG00000260302	0.602537	-4.33383	1.46536469961659e-05	0.000721118	-1.4373	NA	down
	536	ENSG00000128253	0.515744	-5.09479	3.49123653168683e-07	2.69486858572908e-05	-1.63322	RFPL2	down
	537	ENSG00000268654	0.690272	-3.85725	0.00011467	0.00411072	-1.27634	MIMT1	down
	538	ENSG00000280623	0.392541	-6.84086	7.87189524041418e-12	1.34546152310043e-09	-1.98987	NA	down
	539	ENSG00000049089	0.509473	-5.33221	9.7022671905182e-08	8.40409506009457e-06	-1.71535	COL9A2	down
	540	ENSG00000059915	0.681618	-4.01838	5.86007463889442e-05	0.00230348	-1.33813	PSD	down
	541	ENSG00000171847	0.67812	-4.04268	5.28426863892624e-05	0.00212069	-1.35427	FAM90A1	down
	542	ENSG00000239620	0.607106	-4.52117	6.149808816004e-06	0.00035142	-1.4981	PRR20G	down
	543	ENSG00000148798	0.404956	-6.82452	8.82199150253787e-12	1.481398099413e-09	-2.01484	INA	down
	544	ENSG00000242498	0.310039	-9.09326	9.6115877718144e-20	3.99988314599659e-17	-2.31465	ARPIN	down
	545	ENSG00000196361	0.538789	-5.23858	1.61820513213991e-07	1.33522848467907e-05	-1.68706	ELAVL3	down
	546	ENSG00000237512	0.682666	-4.14438	3.40728559750547e-05	0.00148277	-1.38409	UNC5B-AS1	down
	547	ENSG00000274428	0.346732	-8.29229	1.11087180297299e-16	3.54423648738534e-14	-2.25315	LOC124904634	down
	548	ENSG00000204219	0.336669	-8.5733	1.00561191436633e-17	3.43757658512763e-15	-2.29733	TCEA3	down
	549	ENSG00000270601	0.400879	-7.24995	4.16913412020518e-13	8.96738589472896e-11	-2.13626	PRAMEF5	down
	550	ENSG00000267751	0.519011	-5.60023	2.1406223643856e-08	2.15673336428598e-06	-1.8096	BSG-AS1	down
	551	ENSG00000180543	0.743645	-4.01047	6.05979132660182e-05	0.00235778	-1.34303	TSPYL5	down
	552	ENSG00000286257	0.48275	-6.18315	6.28333463519894e-10	7.96568708090154e-08	-1.94982	LOC124903324	down
	553	ENSG00000204832	0.645721	-4.70933	2.48538435716094e-06	0.000154644	-1.57112	ST8SIA6-AS1	down
	554	ENSG00000117407	0.59085	-5.15427	2.54626517707706e-07	2.00890842956145e-05	-1.71209	ARTN	down
	555	ENSG00000241186	0.284477	-10.7674	4.90410310782111e-27	3.02836276751676e-24	-2.58508	TDGF1	down
	556	ENSG00000131914	0.220198	-13.9483	3.22347516323207e-44	3.85668656560947e-41	-2.76379	LIN28A	down
	557	ENSG00000171872	0.87232	-3.61269	0.000303038	0.00926688	-1.175	KLF17	down
	558	ENSG00000133101	0.264764	-11.9048	1.11782877841589e-32	9.30373752400669e-30	-2.71533	CCNA1	down
	559	ENSG00000176887	0.335311	-9.48645	2.39042085338384e-21	1.08951967610302e-18	-2.53395	SOX11	down
	560	ENSG00000240563	0.211596	-15.3763	2.35896404650104e-53	4.51576487421693e-50	-2.95203	L1TD1	down
	561	ENSG00000265843	0.146599	-22.3094	2.99384315908248e-110	1.91037131981053e-106	-3.11644	LINC01029	down
	562	ENSG00000249910	0.900566	-3.64624	0.000266104	0.00830999	-1.15607	TRIM51CP	down
	563	ENSG00000228526	0.701747	-4.69722	2.63729335065517e-06	0.000162857	-1.59668	MIR34AHG	down
	564	ENSG00000164241	0.41229	-8.04737	8.45925325609019e-16	2.49131515509745e-13	-2.40654	C5orf63	down
	565	ENSG00000175063	0.346855	-9.61475	6.92788517235362e-22	3.23464648425282e-19	-2.62152	UBE2C	down
	566	ENSG00000074657	0.290798	-11.7069	1.17520141139298e-31	8.33217800677624e-29	-2.85405	ZNF532	down
	567	ENSG00000213186	0.316512	-10.9595	5.97973959146431e-28	3.94724672411729e-25	-2.83127	TRIM59	down
	568	ENSG00000136014	0.632822	-5.51971	3.39556305244743e-08	3.23389370711448e-06	-1.88502	USP44	down
	569	ENSG00000182053	0.233875	-15.3398	4.14553873424592e-53	7.21436799906087e-50	-3.19078	TRIM49B	down
	570	ENSG00000196589	0.223402	-16.1327	1.50386619415934e-58	3.19872339497691e-55	-3.23638	MBD3L2B	down
	571	ENSG00000120669	0.259565	-13.9486	3.20707311961935e-44	3.85668656560947e-41	-3.1429	SOHLH2	down
	572	ENSG00000163497	0.628943	-5.77701	7.60396379676777e-09	8.41402768563731e-07	-1.9639	FEV	down
	573	ENSG00000184343	0.626895	-5.86333	4.5366712106987e-09	5.20032916086259e-07	-2.01936	SRPK3	down
	574	ENSG00000283755	0.723677	-5.08703	3.63716676024844e-07	2.77395550961896e-05	-1.73229	CPHXL	down
	575	ENSG00000171160	0.513929	-7.30309	2.81239842565004e-13	6.26020268165335e-11	-2.39506	MORN4	down
	576	ENSG00000180532	0.693809	-5.43656	5.43202072829522e-08	4.99677526348793e-06	-1.89037	ZSCAN4	down
	577	ENSG00000124900	0.939705	-4.04388	5.25729173804962e-05	0.00211429	-1.34391	TRIM51	down
	578	ENSG00000253377	0.9432	-4.04159	5.30907964098378e-05	0.00212362	-1.30657	NA	down
	579	ENSG00000204505	0.956713	-4.0707	4.6872055192124e-05	0.00190909	-1.1924	PRAMEF9	down
	580	ENSG00000261239	0.438433	-8.91553	4.85503084734404e-19	1.85879711021414e-16	-2.76238	NA	down
	581	ENSG00000164853	0.452636	-8.72885	2.57276567627441e-18	9.29253836621152e-16	-2.73498	UNCX	down
	582	ENSG00000157765	0.655128	-6.03482	1.59137845454002e-09	1.90398485970373e-07	-2.08068	SLC34A2	down
	583	ENSG00000230522	0.288412	-13.8291	1.70111380352192e-43	1.91555420828354e-40	-3.36239	MBD3L2	down
	584	ENSG00000225581	0.767287	-5.22617	1.73058459728774e-07	1.42182750840684e-05	-1.83093	TRIM53AP	down
	585	ENSG00000256980	0.374301	-10.7154	8.61493629490932e-27	4.85046251451321e-24	-3.03513	KHDC1L	down
	586	ENSG00000144015	0.294513	-13.7436	5.56334906190172e-43	5.91662172733248e-40	-3.39217	TRIM43	down
	587	ENSG00000204481	0.727705	-5.57932	2.41462200354177e-08	2.38263448524743e-06	-1.95837	PRAMEF14	down
	588	ENSG00000250584	0.978911	-4.17068	3.0369778951761e-05	0.00135517	-1.42829	LINC01511	down
	589	ENSG00000128250	0.76904	-5.40073	6.63704361226408e-08	5.96492609716297e-06	-1.89812	RFPL1	down
	590	ENSG00000144188	0.836893	-4.96797	6.76580835526508e-07	4.88191342017798e-05	-1.68299	NA	down
	591	ENSG00000248429	0.599898	-7.00254	2.51358804504215e-12	4.58263009011828e-10	-2.42553	GASK1B-AS1	down
	592	ENSG00000186891	0.84667	-5.05047	4.4073125263152e-07	3.2828476144456e-05	-1.79818	TNFRSF18	down
	593	ENSG00000151338	0.621928	-6.87826	6.05873446281251e-12	1.04488607046504e-09	-2.35106	MIPOL1	down
	594	ENSG00000113430	0.642831	-6.77522	1.24218504687097e-11	2.0499265820906e-09	-2.38828	IRX4	down
	595	ENSG00000264334	0.621588	-7.04613	1.8396352326078e-12	3.55718558159708e-10	-2.4101	NA	down
	596	ENSG00000157227	1.06367	-4.13747	3.51163076524581e-05	0.00151403	-1.42253	MMP14	down
	597	ENSG00000150244	0.291591	-15.2651	1.30670547387061e-52	2.08452190719208e-49	-3.7547	TRIM48	down
	598	ENSG00000163286	0.258369	-17.2329	1.50515202694212e-66	3.60164065646912e-63	-3.87315	ALPG	down
	599	ENSG00000232423	0.558568	-8.04462	8.65168316903011e-16	2.5093813773446e-13	-2.75687	PRAMEF6	down
	600	ENSG00000116726	0.299845	-15.0497	3.46546262262852e-51	5.10302699884444e-48	-3.7724	PRAMEF12	down
	601	ENSG00000254764	0.38839	-11.7177	1.03398841178258e-31	7.61293852567458e-29	-3.45529	TRIM53CP	down
	602	ENSG00000213921	0.820736	-5.69066	1.26548176051453e-08	1.36096164840054e-06	-2.09464	LEUTX	down
	603	ENSG00000258376	1.26752	-3.68575	0.000228026	0.00741656	-1.26122	NA	down
	604	ENSG00000255363	1.03808	-4.50346	6.68562694969792e-06	0.000379771	-1.60447	NA	down
	605	ENSG00000269466	0.206984	-22.9582	1.2190118820951e-116	2.33355444589465e-112	-4.33534	H3Y1	down
	606	ENSG00000256779	1.03508	-4.61191	3.9897960216455e-06	0.000236146	-1.69573	NA	down
	607	ENSG00000037042	1.26543	-3.78076	0.000156348	0.00536374	-1.26411	TUBG2	down
	608	ENSG00000116721	0.478484	-10.0003	1.51946331288752e-23	7.45822723041173e-21	-3.24743	PRAMEF1	down
	609	ENSG00000196593	0.27761	-17.2478	1.16291557794645e-66	3.18024184408984e-63	-4.09038	NA	down
	610	ENSG00000205044	0.784724	-6.2378	4.43781002084665e-10	5.74006738034239e-08	-2.28295	NA	down
	611	ENSG00000126803	0.458382	-10.7351	6.96141470068817e-27	4.03825338228102e-24	-3.48051	HSPA2	down
	612	ENSG00000288016	1.00262	-4.93727	7.92226399714026e-07	5.52424715749036e-05	-1.8547	NA	down
	613	ENSG00000268799	0.895654	-5.61459	1.9703136689249e-08	1.99564627323965e-06	-2.13384	H3Y2	down
	614	ENSG00000178928	0.589217	-8.54304	1.30740223420858e-17	4.39080718762365e-15	-3.08568	TPRX1	down
	615	ENSG00000184302	0.776582	-6.49553	8.27397179470851e-11	1.21837416973927e-08	-2.50691	SIX6	down
	616	ENSG00000196092	1.20312	-4.33856	1.43421599973621e-05	0.000709437	-1.623	PAX5	down
	617	ENSG00000144010	0.900652	-5.83761	5.29549290310792e-09	6.03402503834494e-07	-2.22863	TRIM43B	down
	618	ENSG00000102387	1.39835	-4.02533	5.68956680676055e-05	0.00224106	-1.33932	TAF7L	down
	619	ENSG00000259783	1.00127	-5.63135	1.78802525465974e-08	1.84022405644901e-06	-2.22496	LINC02259	down
	620	ENSG00000187569	1.38517	-4.11616	3.85245220401928e-05	0.00163843	-1.40417	DPPA3	down
	621	ENSG00000204501	0.971116	-5.94978	2.68506019294376e-09	3.15338081432653e-07	-2.46239	PRAMEF15	down
	622	ENSG00000287530	0.587706	-9.87577	5.30231720366348e-23	2.53755645574325e-20	-3.71113	NA	down
	623	ENSG00000163283	1.38013	-4.29487	1.74798378239865e-05	0.000828259	-1.48445	ALPP	down
	624	ENSG00000133110	1.38798	-4.33261	1.4735090775471e-05	0.000721357	-1.46461	POSTN	down
	625	ENSG00000284484	1.34656	-4.55952	5.1269868656423e-06	0.000299225	-1.68338	CPHXL2	down
	626	ENSG00000124610	1.3358	-4.61155	3.99683617070227e-06	0.000236146	-1.74025	H1-1	down
	627	ENSG00000205221	1.49594	-4.26957	1.95849178574815e-05	0.000909986	-1.08303	VIT	down
	628	ENSG00000188707	1.43435	-4.48198	7.39522627418371e-06	0.000412731	-1.25441	NA	down
	629	ENSG00000237247	1.32538	-4.88154	1.05262370322448e-06	7.12027404622838e-05	-1.91236	MBD3L5	down
	630	ENSG00000197213	1.31953	-4.93694	7.93589285017943e-07	5.52424715749036e-05	-1.95395	ZSCAN5B	down
	631	ENSG00000251360	1.38515	-4.88016	1.0600027873752e-06	7.13121069122035e-05	-1.49624	NA	down
	632	ENSG00000269564	1.27846	-5.40442	6.50184221233506e-08	5.87097950333633e-06	-2.39119	NA	down
	633	ENSG00000281131	0.77317	-9.05708	1.33988989976795e-19	5.45734305345911e-17	-4.08941	SCHLAP1	down
	634	ENSG00000101460	1.36466	-5.27479	1.32907972694817e-07	1.12081820321448e-05	-1.69887	MAP1LC3A	down
	635	ENSG00000286284	1.31755	-5.61576	1.95702271787337e-08	1.99564627323965e-06	-2.01407	NA	down
	636	ENSG00000205863	1.28757	-6.04372	1.50602143819875e-09	1.82466888553409e-07	-2.36118	C1QTNF9B	down
	637	ENSG00000127399	1.20699	-7.76376	8.2447666320969e-15	2.25470810911759e-12	-4.67698	LRRC61	down
	1	ENSG00000168754	1.06484	8.58983	8.70993985199054e-18	3.031534156121e-15	4.87816	FAM178B	up
	2	ENSG00000172716	1.25842	6.91966	4.52739740241336e-12	7.95118976829348e-10	3.04126	SLFN11	up
	3	ENSG00000206052	1.2196	6.95013	3.64957745648247e-12	6.52933282705084e-10	3.87332	DOK6	up
	4	ENSG00000104689	1.0624	7.72135	1.1510120838272e-14	3.01833209872658e-12	4.29357	TNFRSF10A	up
	5	ENSG00000250486	1.27055	6.42826	1.29074044623424e-10	1.80355068337679e-08	2.66727	FAM218A	up
	6	ENSG00000134873	1.07489	7.3458	2.04525914593387e-13	4.6609995036443e-11	3.91982	CLDN10	up
	7	ENSG00000180730	1.36136	5.28152	1.28117643863957e-07	1.08520179490607e-05	1.71528	SHISA2	up
	8	ENSG00000163071	1.45998	4.79442	1.63147603237415e-06	0.000106229	1.28192	SPATA18	up
	9	ENSG00000248685	1.37921	5.05596	4.28241979009837e-07	3.2148377271315e-05	1.57655	NA	up
	10	ENSG00000179542	1.23853	5.46117	4.73011851809551e-08	4.41700774594645e-06	1.0036	SLITRK4	up
	11	ENSG00000240519	1.56649	4.2905	1.78274258735304e-05	0.000840568	0.967976	RPLP1P9	unchanged
	12	ENSG00000286654	1.40455	4.78038	1.74961904758237e-06	0.000113152	1.41582	NA	up
	13	ENSG00000174607	0.292262	22.6009	4.24733971979056e-113	4.06534121279753e-109	5.62978	UGT8	up
	14	ENSG00000228590	1.47078	4.44143	8.9363636155376e-06	0.000477846	1.17225	MIR4432HG	up
	15	ENSG00000223914	1.56221	4.15733	3.21995423005022e-05	0.00142027	0.952613	NA	unchanged
	16	ENSG00000228778	1.45017	4.45859	8.25011212243765e-06	0.000449948	1.21851	NA	up
	17	ENSG00000228100	1.33332	4.83857	1.30776007321111e-06	8.66243982058142e-05	1.85799	LINC01820	up
	18	ENSG00000187600	1.48423	4.30425	1.6755557975555e-05	0.000801879	1.11362	LINC02583	up
	19	ENSG00000184368	0.298256	21.2016	9.23784858723945e-100	4.42100338763812e-96	5.36366	MAP7D2	up
	20	ENSG00000242221	1.64113	3.66957	0.000242957	0.00775155	0.772005	PSG2	unchanged
	21	ENSG00000242781	1.60216	3.68513	0.000228583	0.00741656	0.81815	LINC02050	unchanged
	22	ENSG00000236388	1.60911	3.66912	0.000243389	0.00775239	0.807187	NA	unchanged
	23	ENSG00000056291	0.835527	7.04195	1.89563143251581e-12	3.62880725126501e-10	2.88625	NPFFR2	up
	24	ENSG00000227674	0.973897	5.9686	2.39303122896765e-09	2.82776523556344e-07	2.40094	LINC00355	up
	25	ENSG00000237849	1.57708	3.67232	0.000240357	0.00770713	0.844229	NA	unchanged
	26	ENSG00000177551	0.486751	11.8423	2.35901900817453e-32	1.8063480349394e-29	4.02324	NHLH2	up
	27	ENSG00000163565	1.59101	3.61667	0.000298413	0.00915467	0.818664	IFI16	unchanged
	28	ENSG00000224167	1.39185	4.1302	3.62455242027075e-05	0.00155571	1.38836	NA	up
	29	ENSG00000119919	0.547194	10.4668	1.22737258289937e-25	6.52655370956742e-23	3.75737	NKX2-3	up
	30	ENSG00000251279	0.986876	5.66157	1.4999858444726e-08	1.57770489124939e-06	2.23702	NA	up
	31	ENSG00000230947	1.44587	3.85939	0.00011367	0.00408459	1.17516	NA	up
	32	ENSG00000013297	0.305711	18.1481	1.32899171080988e-73	5.08817766400671e-70	4.63032	CLDN11	up
	33	ENSG00000169715	0.312077	17.7684	1.24234116048289e-70	3.96368947252066e-67	4.58651	MT1E	up
	34	ENSG00000134330	0.703721	7.76168	8.38144443998913e-15	2.2598026889396e-12	2.99292	IAH1	up
	35	ENSG00000251676	0.861046	6.265	3.7281658924292e-10	4.92088085450689e-08	2.46632	SNHG27	up
	36	ENSG00000146802	0.505259	10.5086	7.88786812044456e-26	4.314213126562e-23	3.6165	TMEM168	up
	37	ENSG00000118231	1.27877	3.96415	7.3658945861899e-05	0.00279218	1.32699	CRYGD	up
	38	ENSG00000170624	0.733651	6.87833	6.05582540864548e-12	1.04488607046504e-09	2.57363	SGCD	up
	39	ENSG00000137871	0.73089	6.82636	8.70981905365358e-12	1.47550501012469e-09	2.56103	ZNF280D	up
	40	ENSG00000260289	1.0375	4.6716	2.98869331688606e-06	0.000181627	1.69715	NA	up
	41	ENSG00000251516	1.07198	4.33248	1.47442263693635e-05	0.000721357	1.31658	NA	up
	42	ENSG00000267374	0.470391	9.37066	7.2080499281984e-21	3.13599317671595e-18	3.03561	MIR924HG	up
	43	ENSG00000188725	0.363144	12.0461	2.03408630166564e-33	1.85421495584692e-30	3.39996	SMIM15	up
	44	ENSG00000237734	1.09276	3.97229	7.11847189933271e-05	0.00270912	1.11591	NA	up
	45	ENSG00000165091	0.363703	11.8615	1.87565401544242e-32	1.49606853406726e-29	3.36621	TMC1	up
	46	ENSG00000232100	0.932187	4.49146	7.07380174502115e-06	0.000398276	1.37068	LINC01653	up
	47	ENSG00000156269	0.886438	4.71406	2.42827397270618e-06	0.000152102	1.55756	NAA11	up
	48	ENSG00000249464	1.11838	3.62884	0.000284695	0.00884728	1.06589	LINC01091	up
	49	ENSG00000164736	0.701266	5.77955	7.49016411978587e-09	8.33629138052679e-07	2.03676	SOX17	up
	50	ENSG00000223727	0.988129	4.07181	4.66494800235065e-05	0.00190407	1.16416	NA	up
	51	ENSG00000148848	1.0354	3.80801	0.000140088	0.00485817	1.14807	ADAM12	up
	52	ENSG00000197465	0.899406	4.37689	1.20386842186449e-05	0.000614551	1.49719	GYPE	up
	53	ENSG00000254300	0.825317	4.70207	2.57540130635088e-06	0.00015955	1.57902	LINC01111	up
	54	ENSG00000250244	0.958158	3.91534	9.02785538784648e-05	0.00332987	1.27075	LOC124901067	up
	55	ENSG00000246582	0.767564	4.7574	1.9610337873065e-06	0.000125973	1.61531	TNFRSF10A-DT	up
	56	ENSG00000173193	0.303659	11.9936	3.83859789696211e-33	3.3401036155248e-30	3.01883	PARP14	up
	57	ENSG00000173626	0.970174	3.75293	0.000174779	0.00593224	1.10921	TRAPPC3L	up
	58	ENSG00000271192	0.693653	5.1899	2.1040851291963e-07	1.70671617068664e-05	1.74691	NA	up
	59	ENSG00000180708	0.811777	4.33967	1.42698511016615e-05	0.000707744	1.3374	OR10K2	up
	60	ENSG00000075223	0.73906	4.72232	2.3316578381629e-06	0.000148289	1.50168	SEMA3C	up
	61	ENSG00000131844	0.46391	7.32046	2.47130924858549e-13	5.56567917007906e-11	2.29311	MCCC2	up
	62	ENSG00000119125	0.866569	3.89442	9.84323723206278e-05	0.00359598	1.21372	GDA	up
	63	ENSG00000138772	0.549447	6.13224	8.66525481723191e-10	1.08417629389719e-07	2.02918	ANXA3	up
	64	ENSG00000175779	0.928711	3.62248	0.000291797	0.00902401	1.06722	LINC02694	up
	65	ENSG00000106823	0.842942	3.98701	6.69106276233702e-05	0.0025772	1.3261	ECM2	up
	66	ENSG00000178445	0.437117	7.45231	9.17204238084965e-14	2.28026502982604e-11	2.26359	GLDC	up
	67	ENSG00000234456	0.578031	5.54377	2.96019638624709e-08	2.83335197109641e-06	1.80386	MAGI2-AS3	up
	68	ENSG00000140853	0.312874	10.2032	1.91931702736441e-24	9.66881206706237e-22	2.61468	NLRC5	up
	69	ENSG00000206337	0.351558	8.89825	5.67360907658885e-19	2.12960585398314e-16	2.44577	HCP5	up
	70	ENSG00000259664	0.750232	4.10037	4.12497202436458e-05	0.00173167	1.33635	LINC02254	up
	71	ENSG00000281392	0.821381	3.72991	0.000191546	0.00639925	1.14221	LINC00506	up
	72	ENSG00000279864	0.743314	4.06825	4.73673142571703e-05	0.00192516	1.31766	NA	up
	73	ENSG00000179008	0.683365	4.42344	9.71417771932335e-06	0.000508083	1.48759	C14orf39	up
	74	ENSG00000172936	0.567772	5.30363	1.13519987371897e-07	9.74490187560642e-06	1.7355	MYD88	up
	75	ENSG00000154678	0.733341	4.01176	6.02665954888856e-05	0.00234966	1.29021	PDE1C	up
	76	ENSG00000181481	0.799464	3.62778	0.000285864	0.00886921	1.15921	RNF135	up
	77	ENSG00000165186	0.513227	5.64549	1.64711342814281e-08	1.71362458450749e-06	1.81371	PTCHD1	up
	78	ENSG00000236924	0.587551	4.88904	1.01328149604322e-06	6.90293511699479e-05	1.59784	NA	up
	79	ENSG00000107518	0.688131	4.0917	4.28218960378596e-05	0.00177818	1.31131	ATRNL1	up
	80	ENSG00000286871	0.656513	4.09414	4.23737229144149e-05	0.00176339	1.34289	LOC124901358	up
	81	ENSG00000144451	0.210651	12.1847	3.75137617933895e-34	3.59062971005428e-31	2.329	SPAG16	up
	82	ENSG00000053108	0.360629	7.03714	1.96228628021942e-12	3.71921250121192e-10	1.95151	FSTL4	up
	83	ENSG00000125726	0.374907	6.7683	1.30308212098936e-11	2.13204282411105e-09	1.91259	CD70	up
	84	ENSG00000279175	0.347974	7.23633	4.60977612906074e-13	9.69724664160546e-11	1.97148	NA	up
	85	ENSG00000125798	0.636846	3.94316	8.04134686722362e-05	0.00301834	1.30629	FOXA2	up
	86	ENSG00000238129	0.56709	4.40657	1.05022229217218e-05	0.000543362	1.44251	NA	up
	87	ENSG00000133392	0.59988	4.15009	3.32346517991799e-05	0.0014592	1.35419	MYH11	up
	88	ENSG00000286215	0.636932	3.85534	0.00011557	0.00413525	1.25243	NA	up
	89	ENSG00000003402	0.3795	6.34694	2.19636189927465e-10	2.98191176154714e-08	1.80688	CFLAR	up
	90	ENSG00000149294	0.451226	5.32152	1.02902168099535e-07	8.87322614382615e-06	1.64078	NCAM1	up
	91	ENSG00000151136	0.521133	4.47283	7.71917180461952e-06	0.000428313	1.44069	ABTB3	up
	92	ENSG00000279443	0.52038	4.32272	1.54114808624564e-05	0.000746891	1.37869	NA	up
	93	ENSG00000268628	0.502244	4.47801	7.5343538319197e-06	0.000419274	1.42121	NA	up
	94	ENSG00000115297	0.398702	5.58684	2.31240578930605e-08	2.31174983341731e-06	1.63408	TLX2	up
	95	ENSG00000204397	0.565334	3.91144	9.17472864510592e-05	0.00336521	1.27666	CARD16	up
	96	ENSG00000236117	0.293816	7.43084	1.0791158611256e-13	2.64839934993941e-11	1.82185	LINC01639	up
	97	ENSG00000272121	0.263151	8.26224	1.42965397434691e-16	4.48653541490538e-14	1.87517	NA	up
	98	ENSG00000154274	0.500201	4.30055	1.70371833110464e-05	0.0008113	1.36151	C4orf19	up
	99	ENSG00000227195	0.407954	5.26296	1.41756534483503e-07	1.19019532439372e-05	1.55278	MIR663AHG	up
	100	ENSG00000146833	0.306143	7.0047	2.4751100812951e-12	4.55586848906079e-10	1.76528	TRIM4	up
	101	ENSG00000261087	0.578252	3.70007	0.000215538	0.00707727	1.20036	ZNNT1	up
	102	ENSG00000196335	0.493701	4.27625	1.90070673053709e-05	0.000887445	1.35638	STK31	up
	103	ENSG00000070915	0.571783	3.66453	0.000247795	0.00787963	1.19894	SLC12A3	up
	104	ENSG00000122420	0.323977	6.45488	1.08301834939745e-10	1.52442796047907e-08	1.6863	PTGFR	up
	105	ENSG00000289575	0.343845	6.03846	1.55594324384056e-09	1.87329695074465e-07	1.63229	LOC124905233	up
	106	ENSG00000198873	0.457954	4.46266	8.09488556489245e-06	0.000442744	1.37664	GRK5	up
	107	ENSG00000162374	0.521409	3.89391	9.86405477110131e-05	0.00359672	1.24886	ELAVL4	up
	108	ENSG00000231421	0.266197	7.55831	4.08348399512565e-14	1.05635316376609e-11	1.73063	NA	up
	109	ENSG00000203805	0.488195	4.08466	4.41413550150669e-05	0.0018133	1.28612	PLPP4	up
	110	ENSG00000021826	0.461362	4.14359	3.41917184365666e-05	0.00148277	1.28327	CPS1	up
	111	ENSG00000255836	0.373881	5.08496	3.67707413772715e-07	2.79326310390916e-05	1.43916	LOC100419928	up
	112	ENSG00000153064	0.439024	4.30843	1.6441500323468e-05	0.000790803	1.31134	BANK1	up
	113	ENSG00000140538	0.353664	5.33517	9.54529090504099e-08	8.30570471796362e-06	1.46531	NTRK3	up
	114	ENSG00000198865	0.215784	8.72355	2.69613905457375e-18	9.55781294846393e-16	1.70039	CCDC152	up
	115	ENSG00000183323	0.486764	3.84737	0.000119394	0.00424038	1.21244	CCDC125	up
	116	ENSG00000117154	0.507187	3.69082	0.000223537	0.00730232	1.17662	IGSF21	up
	117	ENSG00000140015	0.407794	4.49834	6.84863226937599e-06	0.000386736	1.32541	KCNH5	up
	118	ENSG00000213621	0.361525	5.02236	5.10406720117112e-07	3.74356928858309e-05	1.39436	RPSAP54	up
	119	ENSG00000223416	0.483775	3.75074	0.000176315	0.00597381	1.17453	NA	up
	120	ENSG00000143355	0.404644	4.43911	9.03319152238313e-06	0.00048034	1.30543	LHX9	up
	121	ENSG00000241743	0.243019	7.19672	6.16786326741213e-13	1.26958501643087e-10	1.53943	NA	up
	122	ENSG00000017483	0.24012	7.24109	4.45099754283611e-13	9.46727177361241e-11	1.53487	SLC38A5	up
	123	ENSG00000169059	0.21081	8.14186	3.89239121580643e-16	1.16425070381535e-13	1.55704	VCX3A	up
	124	ENSG00000128918	0.270707	6.30655	2.85319000794638e-10	3.79295946681371e-08	1.46101	ALDH1A2	up
	125	ENSG00000170627	0.156509	10.8922	1.2562786033571e-27	8.01631376802167e-25	1.6138	GTSF1	up
	126	ENSG00000226792	0.202825	8.35533	6.52478675069235e-17	2.11701682658481e-14	1.54808	C13orf42	up
	127	ENSG00000180353	0.336644	4.96673	6.80912544108823e-07	4.88191342017798e-05	1.32608	HCLS1	up
	128	ENSG00000243279	0.293124	5.69982	1.19931961412148e-08	1.29709465384901e-06	1.3948	PRAF2	up
	129	ENSG00000249655	0.461603	3.59022	0.000330395	0.00997418	1.10887	NA	up
	130	ENSG00000095574	0.293083	5.64434	1.65814423387178e-08	1.71577594967608e-06	1.38154	IKZF5	up
	131	ENSG00000198626	0.270656	6.03304	1.60901388157591e-09	1.9131274990688e-07	1.39737	RYR2	up
	132	ENSG00000114115	0.157669	10.3379	4.74744822079681e-25	2.45622706191117e-22	1.54179	RBP1	up
	133	ENSG00000189423	0.408696	3.94762	7.89307688172274e-05	0.00296851	1.16596	NA	up
	134	ENSG00000145247	0.35982	4.46916	7.85256689309563e-06	0.000434025	1.23948	OCIAD2	up
	135	ENSG00000147676	0.224877	7.05163	1.76838714317038e-12	3.4899211424444e-10	1.42059	MAL2	up
	136	ENSG00000244128	0.30344	5.22324	1.7582324196353e-07	1.43836936790934e-05	1.30821	LINC01322	up
	137	ENSG00000163840	0.386022	4.05727	4.96506380643276e-05	0.00201369	1.16633	DTX3L	up
	138	ENSG00000261786	0.276056	5.56989	2.54904333780811e-08	2.47145206029769e-06	1.30858	NA	up
	139	ENSG00000253706	0.395425	3.88377	0.00010285	0.00374306	1.13019	NA	up
	140	ENSG00000170430	0.230605	6.61601	3.69024109686182e-11	5.69695849332467e-09	1.35923	MGMT	up
	141	ENSG00000174080	0.335197	4.53486	5.76422596972474e-06	0.000333367	1.20798	CTSF	up
	142	ENSG00000164161	0.202523	7.4656	8.29178563259506e-14	2.11639536486356e-11	1.38162	HHIP	up
	143	ENSG00000152377	0.279042	5.36149	8.25366671421085e-08	7.24770375734579e-06	1.26896	SPOCK1	up
	144	ENSG00000165806	0.347264	4.24709	2.16566852185205e-05	0.000998973	1.15515	CASP7	up
	145	ENSG00000064763	0.358814	4.08657	4.37805002938541e-05	0.00180623	1.13134	FAR2	up
	146	ENSG00000132164	0.29468	4.96168	6.98869197424298e-07	4.9919600919005e-05	1.21869	SLC6A11	up
	147	ENSG00000165556	0.268891	5.43648	5.43436333770811e-08	4.99677526348793e-06	1.25346	CDX2	up
	148	ENSG00000151640	0.338938	4.30732	1.6524390802687e-05	0.000792798	1.15428	DPYSL4	up
	149	ENSG00000100181	0.220205	6.62747	3.4148584265263e-11	5.35824875893385e-09	1.31281	TPTEP1	up
	150	ENSG00000160072	0.396069	3.59654	0.000322478	0.00976049	1.04571	ATAD3B	up
	151	ENSG00000188620	0.365762	3.87691	0.000105791	0.00382829	1.08363	HMX3	up
	152	ENSG00000125845	0.222814	6.34502	2.22392071925425e-10	2.99806438934396e-08	1.26886	BMP2	up
	153	ENSG00000170381	0.213348	6.59064	4.37943197179603e-11	6.65360843143582e-09	1.2729	SEMA3E	up
	154	ENSG00000130640	0.225315	6.06109	1.3520606996805e-09	1.66983857896669e-07	1.22274	TUBGCP2	up
	155	ENSG00000143768	0.218028	6.24746	4.1717486711957e-10	5.4326384226326e-08	1.22782	LEFTY2	up
	156	ENSG00000179988	0.359812	3.77013	0.000163162	0.00557751	1.0454	PSTK	up
	157	ENSG00000104325	0.299611	4.50681	6.58103039573898e-06	0.000374942	1.11903	DECR1	up
	158	ENSG00000132975	0.359039	3.66045	0.000251773	0.00795945	1.01351	GPR12	up
	159	ENSG00000065833	0.274505	4.75229	2.01124744292955e-06	0.000128767	1.11194	ME1	up
	160	ENSG00000049246	0.348454	3.7383	0.000185266	0.00622201	1.01838	PER3	up
	161	ENSG00000283633	0.215477	6.04504	1.493720741561e-09	1.82129274877084e-07	1.17679	NA	up
	162	ENSG00000197162	0.294694	4.41156	1.02627409223589e-05	0.000532411	1.08357	ZNF785	up
	163	ENSG00000206190	0.268629	4.83434	1.33590752938763e-06	8.81837166726462e-05	1.1137	ATP10A	up
	164	ENSG00000234465	0.290989	4.44582	8.75569845376281e-06	0.000470816	1.08252	PINLYP	up
	165	ENSG00000166501	0.200541	6.32334	2.55965382620981e-10	3.42653518847093e-08	1.16075	PRKCB	up
	166	ENSG00000107949	0.169564	7.46222	8.50779687230684e-14	2.14295730956013e-11	1.18682	BCCIP	up
	167	ENSG00000119965	0.326534	3.86764	0.000109896	0.00396183	1.0143	C10orf88	up
	168	ENSG00000165669	0.191299	6.58562	4.52992147134298e-11	6.82805407290698e-09	1.16201	FAM204A	up
	169	ENSG00000112343	0.279616	4.49931	6.81756074192661e-06	0.00038612	1.06638	TRIM38	up
	170	ENSG00000166394	0.194668	6.42109	1.35302997956362e-10	1.8768878912164e-08	1.14973	CYB5R2	up
	171	ENSG00000160445	0.344362	3.61437	0.000301076	0.00922158	0.977798	ZER1	unchanged
	172	ENSG00000197358	0.234881	5.29739	1.17467296759144e-07	1.00387342047334e-05	1.10421	BNIP3P1	up
	173	ENSG00000183605	0.187246	6.63809	3.17772272765129e-11	5.02736745251477e-09	1.15015	SFXN4	up
	174	ENSG00000101311	0.148911	8.25741	1.48864819518898e-16	4.59632135491979e-14	1.16994	FERMT1	up
	175	ENSG00000107560	0.186493	6.49785	8.14747636350557e-11	1.20904759710533e-08	1.12205	RAB11FIP2	up
	176	ENSG00000175029	0.137114	8.81614	1.18471165675026e-18	4.36133370099426e-16	1.1587	CTBP2	up
	177	ENSG00000188690	0.23684	5.06656	4.05079380617796e-07	3.05292700124664e-05	1.06281	UROS	up
	178	ENSG00000143194	0.125091	9.41323	4.81140168786584e-21	2.14196889560037e-18	1.1366	MAEL	up
	179	ENSG00000241990	0.227363	5.16911	2.35215971358767e-07	1.88399135553175e-05	1.05044	NA	up
	180	ENSG00000133321	0.290161	4.04138	5.31376646407789e-05	0.00212362	0.9824	PLAAT4	unchanged
	181	ENSG00000205362	0.212607	5.49566	3.89252879447157e-08	3.68884548082026e-06	1.05829	MT1A	up
	182	ENSG00000108010	0.159782	7.29796	2.92155494287159e-13	6.42842830705643e-11	1.1014	GLRX3	up
	183	ENSG00000127884	0.188757	6.1425	8.1230691614709e-10	1.02302574314498e-07	1.07158	ECHS1	up
	184	ENSG00000166710	0.136759	8.45222	2.85807700474908e-17	9.43313243136409e-15	1.10823	B2M	up
	185	ENSG00000265992	0.162776	7.04927	1.79860278016158e-12	3.51333194088094e-10	1.08152	ESRG	up
	186	ENSG00000106853	0.169644	6.70063	2.07517385414664e-11	3.36652992287535e-09	1.06616	PTGR1	up
	187	ENSG00000248890	0.273687	4.14329	3.42361937007517e-05	0.00148277	0.967311	HHIP-AS1	unchanged
	188	ENSG00000085871	0.218121	5.17567	2.27091913543524e-07	1.83427025357117e-05	1.01759	MGST2	up
	189	ENSG00000099204	0.18039	6.2348	4.52356516324529e-10	5.8117186523493e-08	1.04638	ABLIM1	up
	190	ENSG00000135119	0.155777	7.19981	6.02958609505155e-13	1.25461268062578e-10	1.06226	RNFT2	up
	191	ENSG00000127252	0.2984	3.75692	0.00017202	0.00584898	0.930506	PLAAT1	unchanged
	192	ENSG00000124092	0.17318	6.46406	1.01929624205154e-10	1.44536207122908e-08	1.04719	CTCFL	up
	193	ENSG00000189319	0.25202	4.42358	9.70809007812595e-06	0.000508083	0.972708	FAM53B	unchanged
	194	ENSG00000175470	0.218047	5.08773	3.62376155409479e-07	2.77395550961896e-05	0.999994	PPP2R2D	unchanged
	195	ENSG00000154473	0.138013	7.99823	1.26225513819489e-15	3.60647016574101e-13	1.05752	BUB3	up
	196	ENSG00000166780	0.289571	3.74722	0.000178807	0.00604754	0.909797	BMERB1	unchanged
	197	ENSG00000236824	0.154617	6.93366	4.10076006728142e-12	7.26859721925632e-10	1.01618	BCYRN1	up
	198	ENSG00000089225	0.196874	5.43579	5.45539377354113e-08	4.99677526348793e-06	0.982516	TBX5	unchanged
	199	ENSG00000107669	0.215701	4.94594	7.57761737013491e-07	5.33302681310634e-05	0.963722	ATE1	unchanged
	200	ENSG00000165752	0.224896	4.71506	2.41644743960002e-06	0.000152102	0.949806	STK32C	unchanged
	201	ENSG00000237506	0.277889	3.81144	0.000138162	0.00480007	0.89923	RPSAP15	unchanged
	202	ENSG00000169136	0.179522	5.889	3.88529242337997e-09	4.50764562792502e-07	0.984221	ATF5	unchanged
	203	ENSG00000151893	0.147192	7.12385	1.0495508384108e-12	2.13739911698915e-10	0.998798	CACUL1	unchanged
	204	ENSG00000107679	0.215783	4.85385	1.21084543735071e-06	8.04833826639052e-05	0.946017	PLEKHA1	unchanged
	205	ENSG00000196865	0.214611	4.87985	1.06169098208107e-06	7.13121069122035e-05	0.946995	NHLRC2	unchanged
	206	ENSG00000031081	0.249119	4.17892	2.92895909977327e-05	0.00131618	0.910905	ARHGAP31	unchanged
	207	ENSG00000151923	0.141893	7.28892	3.12440463119354e-13	6.79664521078839e-11	0.98847	TIAL1	unchanged
	208	ENSG00000196821	0.164091	6.26397	3.75306171842452e-10	4.92088085450689e-08	0.9679	ILRUN	unchanged
	209	ENSG00000186767	0.16076	6.39194	1.63790375367254e-10	2.25571162277363e-08	0.969897	SPIN4	unchanged
	210	ENSG00000198546	0.214783	4.78234	1.73263129511234e-06	0.000112433	0.928612	ZNF511	unchanged
	211	ENSG00000084710	0.278588	3.65122	0.000260998	0.00818106	0.862964	EFR3B	unchanged
	212	ENSG00000125148	0.144763	7.02219	2.18409420860322e-12	4.05923450828071e-10	0.969795	MT2A	unchanged
	213	ENSG00000196091	0.226993	4.44382	8.83758487731995e-06	0.000473888	0.901832	MYBPC1	unchanged
	214	ENSG00000196177	0.23979	4.19689	2.70607471370746e-05	0.00122754	0.888838	ACADSB	unchanged
	215	ENSG00000096872	0.252754	3.97657	6.99158891343819e-05	0.00268216	0.876356	IFT74	unchanged
	216	ENSG00000148737	0.180406	5.56453	2.6286429654674e-08	2.52864885869058e-06	0.933948	TCF7L2	unchanged
	217	ENSG00000176171	0.182585	5.45558	4.88136936318654e-08	4.53611911259612e-06	0.925175	BNIP3	unchanged
	218	ENSG00000140600	0.198068	4.97262	6.6054432795042e-07	4.78969699619503e-05	0.903366	SH3GL3	unchanged
	219	ENSG00000187720	0.181471	5.35773	8.4276095220505e-08	7.36665429591839e-06	0.903806	THSD4	unchanged
	220	ENSG00000101417	0.260827	3.7276	0.000193313	0.00643581	0.840792	PXMP4	unchanged
	221	ENSG00000107672	0.167336	5.71133	1.12095737582197e-08	1.21923221848637e-06	0.89788	NSMCE4A	unchanged
	222	ENSG00000148908	0.182232	5.24392	1.57199411500666e-07	1.30271356465682e-05	0.887824	RGS10	unchanged
	223	ENSG00000203791	0.225572	4.23089	2.32768556986432e-05	0.00106856	0.854376	EEF1AKMT2	unchanged
	224	ENSG00000165868	0.233215	4.08739	4.36253219651522e-05	0.00180371	0.847278	HSPA12A	unchanged
	225	ENSG00000123104	0.161341	5.89958	3.64438786931128e-09	4.25393396233085e-07	0.898071	ITPR2	unchanged
	226	ENSG00000182240	0.246873	3.84607	0.000120025	0.00425019	0.832719	BACE2	unchanged
	227	ENSG00000165029	0.204801	4.58583	4.52191458174885e-06	0.000265531	0.85654	ABCA1	unchanged
	228	ENSG00000100060	0.209105	4.46776	7.90434033681544e-06	0.000434807	0.848853	MFNG	unchanged
	229	ENSG00000197771	0.242768	3.8168	0.000135195	0.00473135	0.816018	MCMBP	unchanged
	230	ENSG00000110651	0.213908	4.27332	1.9258695838969e-05	0.000897005	0.827012	CD81	unchanged
	231	ENSG00000123576	0.184109	4.95063	7.39723170980726e-07	5.22528437715278e-05	0.845502	ESX1	unchanged
	232	ENSG00000166965	0.179694	5.07011	3.97591415548967e-07	3.00833694381576e-05	0.848063	RCCD1	unchanged
	233	ENSG00000148773	0.122163	7.36714	1.74330818417049e-13	4.02074079151514e-11	0.870119	MKI67	unchanged
	234	ENSG00000178947	0.207109	4.34083	1.41945676982586e-05	0.000707621	0.818243	SMIM10L2A	unchanged
	235	ENSG00000165813	0.189621	4.7138	2.43134070984628e-06	0.000152102	0.825548	CCDC186	unchanged
	236	ENSG00000165832	0.235919	3.78457	0.000153974	0.00530131	0.791543	TRUB1	unchanged
	237	ENSG00000176170	0.24325	3.60377	0.000313633	0.00952997	0.771571	SPHK1	unchanged
	238	ENSG00000147065	0.166159	5.2454	1.559463933825e-07	1.29794861240052e-05	0.819534	MSN	unchanged
	239	ENSG00000156642	0.153736	5.65077	1.59733617351151e-08	1.67091838084868e-06	0.823922	NPTN	unchanged
	240	ENSG00000184160	0.175241	4.91864	8.71480157666628e-07	6.03967083793078e-05	0.805084	ADRA2C	unchanged
	241	ENSG00000186868	0.235436	3.63672	0.000276135	0.00860919	0.759304	MAPT	unchanged
	242	ENSG00000111676	0.233584	3.62986	0.000283572	0.00882669	0.753387	ATN1	unchanged
	243	ENSG00000234745	0.15597	5.43468	5.48949179965486e-08	5.00406388194252e-06	0.80273	HLA-B	unchanged
	244	ENSG00000187398	0.230022	3.67332	0.000239422	0.00770294	0.7533	LUZP2	unchanged
	245	ENSG00000185070	0.203711	4.13916	3.48580657598563e-05	0.00150629	0.769693	FLRT2	unchanged
	246	ENSG00000178741	0.152606	5.37673	7.58488021865779e-08	6.78492345914795e-06	0.7788	COX5A	unchanged
	247	ENSG00000178718	0.192948	4.25232	2.11570558994041e-05	0.000978284	0.755751	RPP25	unchanged
	248	ENSG00000108679	0.195165	4.15149	3.30320233329229e-05	0.00145364	0.744975	LGALS3BP	unchanged
	249	ENSG00000147872	0.182408	4.33965	1.42709708860085e-05	0.000707744	0.735314	PLIN2	unchanged
	250	ENSG00000139998	0.164441	4.80646	1.53624739737018e-06	0.00010037	0.744086	RAB15	unchanged
	251	ENSG00000129158	0.191246	4.10839	3.9843399153662e-05	0.00168371	0.724729	SERGEF	unchanged
	252	ENSG00000159200	0.202686	3.81778	0.000134656	0.00472259	0.706989	RCAN1	unchanged
	253	ENSG00000177700	0.213787	3.60791	0.000308678	0.00942428	0.697914	POLR2L	unchanged
	254	ENSG00000189067	0.169806	4.43379	9.25927224579865e-06	0.000486951	0.706041	LITAF	unchanged
	255	ENSG00000244398	0.208587	3.58975	0.000330997	0.00997418	0.680643	RPL36AP37	unchanged
	256	ENSG00000214182	0.188894	3.91943	8.87595920823948e-05	0.00328651	0.684185	PTMAP5	unchanged
	257	ENSG00000249395	0.176068	4.2018	2.64803608434756e-05	0.00120694	0.690555	CASC9	unchanged
	258	ENSG00000172954	0.191478	3.84741	0.000119375	0.00424038	0.679415	LCLAT1	unchanged
	259	ENSG00000092847	0.164336	4.34605	1.38608387206264e-05	0.000692789	0.672436	AGO1	unchanged
	260	ENSG00000087510	0.166541	4.28537	1.82438885969288e-05	0.00085809	0.670871	TFAP2C	unchanged
	261	ENSG00000101605	0.168963	4.0976	4.17447529408839e-05	0.001741	0.649672	MYOM1	unchanged
	262	ENSG00000078124	0.170845	4.03724	5.40844892625677e-05	0.00215696	0.646333	ACER3	unchanged
	263	ENSG00000124766	0.147017	4.69103	2.71829357946287e-06	0.000167319	0.656994	SOX4	unchanged
	264	ENSG00000158164	0.173049	3.97472	7.04613431490839e-05	0.0026923	0.643513	TMSB15A	unchanged
	265	ENSG00000231767	0.172881	3.95636	7.60996843477933e-05	0.00287333	0.639976	RPS27AP5	unchanged
	266	ENSG00000213397	0.177102	3.84589	0.000120115	0.00425019	0.635267	HAUS7	unchanged
	267	ENSG00000257923	0.142357	4.6895	2.73867032081814e-06	0.000168033	0.637846	CUX1	unchanged
	268	ENSG00000181704	0.1505	4.3887	1.14032624590165e-05	0.000586808	0.627792	YIPF6	unchanged
	269	ENSG00000102144	0.120902	5.4226	5.87390716672679e-08	5.32910923661852e-06	0.634278	PGK1	unchanged
	270	ENSG00000108828	0.146602	4.43937	9.02217162375399e-06	0.00048034	0.620159	VAT1	unchanged
	271	ENSG00000005059	0.156781	4.13435	3.55966761984864e-05	0.0015313	0.613495	MCUB	unchanged
	272	ENSG00000109472	0.175876	3.67119	0.000241421	0.0077198	0.602775	CPE	unchanged
	273	ENSG00000105968	0.162417	3.95782	7.56355811741152e-05	0.00286145	0.606042	H2AZ2	unchanged
	274	ENSG00000275023	0.174196	3.65768	0.000254513	0.0080134	0.595576	MLLT6	unchanged
	275	ENSG00000181026	0.175176	3.62372	0.000290395	0.00899519	0.592925	AEN	unchanged
	276	ENSG00000140474	0.15199	4.16702	3.08609747840053e-05	0.00136726	0.601384	ULK3	unchanged
	277	ENSG00000124191	0.146935	4.30231	1.6902428001064e-05	0.000806891	0.602245	TOX2	unchanged
	278	ENSG00000122642	0.144516	4.35312	1.34213514746469e-05	0.000672578	0.600258	FKBP9	unchanged
	279	ENSG00000104447	0.144822	4.29728	1.72909096398597e-05	0.00082134	0.593695	TRPS1	unchanged
	280	ENSG00000204711	0.167597	3.66025	0.000251971	0.00795945	0.576228	CFAP95	unchanged
	281	ENSG00000188677	0.165131	3.70377	0.00021242	0.0069989	0.575503	PARVB	unchanged
	282	ENSG00000115159	0.161253	3.75859	0.000170877	0.00582045	0.571874	GPD2	unchanged
	283	ENSG00000128713	0.147976	4.03269	5.5142562333754e-05	0.00218562	0.56812	HOXD11	unchanged
	284	ENSG00000139168	0.157511	3.77571	0.00015955	0.00546379	0.562603	ZCRB1	unchanged
	285	ENSG00000113300	0.136217	4.32804	1.50441569988097e-05	0.00073094	0.565417	CNOT6	unchanged
	286	ENSG00000140367	0.159529	3.67105	0.000241559	0.0077198	0.553255	UBE2Q2	unchanged
	287	ENSG00000184575	0.146566	3.97994	6.89337462598301e-05	0.0026498	0.555859	XPOT	unchanged
	288	ENSG00000135090	0.1464	3.92454	8.68968055769106e-05	0.00322377	0.547553	TAOK3	unchanged
	289	ENSG00000176834	0.157536	3.58904	0.0003319	0.00997418	0.534862	VSIG10	unchanged
	290	ENSG00000164024	0.143169	3.94174	8.08935122773066e-05	0.0030245	0.53892	METAP1	unchanged
	291	ENSG00000107581	0.1327	4.16888	3.06096509094401e-05	0.00136004	0.531676	EIF3A	unchanged
	292	ENSG00000110090	0.147585	3.73942	0.000184448	0.00620543	0.525547	CPT1A	unchanged
	293	ENSG00000206503	0.136741	3.95455	7.66772984525058e-05	0.00288944	0.518452	HLA-A	unchanged
	294	ENSG00000205871	0.148867	3.6211	0.000293355	0.00904299	0.512914	RPS3AP47	unchanged
	295	ENSG00000120837	0.146628	3.60604	0.0003109	0.00947699	0.50383	NFYB	unchanged
	296	ENSG00000154723	0.124076	3.61746	0.000297507	0.00914154	0.433489	ATP5PF	unchanged
	297	ENSG00000131016	0.128948	-3.59632	0.000322749	0.00976049	-0.446656	AKAP12	unchanged
	298	ENSG00000149948	0.129531	-3.69312	0.000221519	0.0072488	-0.460598	HMGA2	unchanged
	299	ENSG00000117523	0.131548	-3.6852	0.000228526	0.00741656	-0.466225	PRRC2C	unchanged
	300	ENSG00000198695	0.127245	-3.85163	0.000117335	0.00418277	-0.472501	ND6	unchanged
	301	ENSG00000173230	0.136924	-3.60076	0.000317286	0.00962568	-0.472646	GOLGB1	unchanged
	302	ENSG00000116133	0.139555	-3.72784	0.000193131	0.00643581	-0.497931	DHCR24	unchanged
	303	ENSG00000187240	0.143494	-3.67968	0.000233524	0.00756405	-0.504131	DYNC2H1	unchanged
	304	ENSG00000234741	0.145979	-3.61823	0.00029662	0.00912892	-0.50351	GAS5	unchanged
	305	ENSG00000008311	0.135869	-4.17947	2.92194376775058e-05	0.00131611	-0.544732	AASS	unchanged
	306	ENSG00000105612	0.138279	-4.21531	2.49431263379482e-05	0.00113959	-0.558331	DNASE2	unchanged
	307	ENSG00000138175	0.14991	-4.00385	6.23210685308881e-05	0.002415	-0.570717	ARL3	unchanged
	308	ENSG00000014919	0.170703	-3.6511	0.00026112	0.00818106	-0.584103	COX15	unchanged
	309	ENSG00000077147	0.128082	-4.89752	9.70538701627108e-07	6.63536513044562e-05	-0.604475	TM9SF3	unchanged
	310	ENSG00000141027	0.136682	-4.64371	3.42208387893942e-06	0.000206653	-0.608562	NCOR1	unchanged
	311	ENSG00000091136	0.177097	-3.62149	0.000292906	0.00904299	-0.598207	LAMB1	unchanged
	312	ENSG00000161970	0.130558	-5.00324	5.63748510348071e-07	4.11902203572256e-05	-0.628567	RPL26	unchanged
	313	ENSG00000124422	0.172331	-3.84413	0.000120979	0.00427288	-0.620098	USP22	unchanged
	314	ENSG00000212907	0.157517	-4.25754	2.06691979396851e-05	0.00095804	-0.634424	ND4L	unchanged
	315	ENSG00000091640	0.128647	-5.26209	1.42426382717001e-07	1.1905974866164e-05	-0.652123	SPAG7	unchanged
	316	ENSG00000137285	0.132846	-5.15398	2.55009532666475e-07	2.00890842956145e-05	-0.657977	TUBB2B	unchanged
	317	ENSG00000074356	0.169239	-4.05031	5.11494022169287e-05	0.00206572	-0.643091	NCBP3	unchanged
	318	ENSG00000137267	0.166632	-4.1157	3.86006611570346e-05	0.00163843	-0.644637	TUBB2A	unchanged
	319	ENSG00000065613	0.156605	-4.42227	9.76703333694404e-06	0.000509456	-0.655571	SLK	unchanged
	320	ENSG00000197147	0.167157	-4.14834	3.34889157276275e-05	0.001467	-0.651567	LRRC8B	unchanged
	321	ENSG00000279088	0.18944	-3.68681	0.000227086	0.00740564	-0.645174	NA	unchanged
	322	ENSG00000101115	0.17922	-3.90307	9.49790087734707e-05	0.00347645	-0.651377	SALL4	unchanged
	323	ENSG00000072778	0.169014	-4.14374	3.41681525547407e-05	0.00148277	-0.657186	ACADVL	unchanged
	324	ENSG00000122257	0.125111	-5.615	1.96561403111497e-08	1.99564627323965e-06	-0.678085	RBBP6	unchanged
	325	ENSG00000132383	0.144631	-4.86194	1.16241528252069e-06	7.75335043668764e-05	-0.670911	RPA1	unchanged
	326	ENSG00000174231	0.151262	-4.7091	2.48813644230905e-06	0.000154644	-0.6767	PRPF8	unchanged
	327	ENSG00000005100	0.177356	-4.01645	5.90803846306803e-05	0.00231757	-0.664297	DHX33	unchanged
	328	ENSG00000099194	0.155084	-4.61739	3.88590497289042e-06	0.000232407	-0.678548	SCD	unchanged
	329	ENSG00000137642	0.180675	-4.00799	6.12369286795393e-05	0.00237781	-0.673591	SORL1	unchanged
	330	ENSG00000151806	0.193184	-3.78234	0.000155364	0.00533955	-0.672978	GUF1	unchanged
	331	ENSG00000029725	0.179179	-4.07891	4.52466869669984e-05	0.00185202	-0.680577	RABEP1	unchanged
	332	ENSG00000095564	0.161921	-4.53337	5.8049771908097e-06	0.000334713	-0.692315	BTAF1	unchanged
	333	ENSG00000108064	0.198895	-3.72355	0.000196443	0.00652867	-0.67884	TFAM	unchanged
	334	ENSG00000134207	0.177836	-4.16654	3.09263546795781e-05	0.00136726	-0.690703	SYT6	unchanged
	335	ENSG00000059573	0.202515	-3.6753	0.000237572	0.00765628	-0.680161	ALDH18A1	unchanged
	336	ENSG00000187867	0.182455	-4.08594	4.38979604581709e-05	0.00180718	-0.692457	PALM3	unchanged
	337	ENSG00000118971	0.185488	-4.03183	5.53446936062831e-05	0.00218897	-0.693024	CCND2	unchanged
	338	ENSG00000154553	0.192875	-3.9114	9.17641673453917e-05	0.00336521	-0.694951	PDLIM3	unchanged
	339	ENSG00000167193	0.204637	-3.71012	0.00020716	0.00684916	-0.692586	CRK	unchanged
	340	ENSG00000108953	0.170612	-4.45527	8.37890418882043e-06	0.000455538	-0.712421	YWHAE	unchanged
	341	ENSG00000139116	0.193387	-3.93419	8.34765654145915e-05	0.00311499	-0.700601	KIF21A	unchanged
	342	ENSG00000166206	0.181881	-4.18763	2.8187811004608e-05	0.00127565	-0.707807	GABRB3	unchanged
	343	ENSG00000150625	0.197663	-3.85927	0.000113727	0.00408459	-0.699925	GPM6A	unchanged
	344	ENSG00000108175	0.188187	-4.07876	4.5277513568164e-05	0.00185202	-0.709738	ZMIZ1	unchanged
	345	ENSG00000138182	0.14319	-5.36186	8.2369640470382e-08	7.24770375734579e-06	-0.733187	KIF20B	unchanged
	346	ENSG00000133030	0.198282	-3.88066	0.000104175	0.00378411	-0.705716	MPRIP	unchanged
	347	ENSG00000198888	0.204926	-3.76013	0.000169824	0.00579492	-0.702664	ND1	unchanged
	348	ENSG00000181222	0.13573	-5.68266	1.32615689598875e-08	1.41824700893367e-06	-0.739949	POLR2A	unchanged
	349	ENSG00000129245	0.15538	-4.96692	6.80240998022471e-07	4.88191342017798e-05	-0.731166	FXR2	unchanged
	350	ENSG00000091542	0.177599	-4.37622	1.20753772213908e-05	0.000614784	-0.724677	ALKBH5	unchanged
	351	ENSG00000178307	0.198063	-3.97328	7.08888147988866e-05	0.00270324	-0.721782	TMEM11	unchanged
	352	ENSG00000279483	0.195171	-4.03295	5.50798796414992e-05	0.00218562	-0.723704	NA	unchanged
	353	ENSG00000072210	0.201231	-3.91573	9.01295070148463e-05	0.00332987	-0.720863	ALDH3A2	unchanged
	354	ENSG00000149150	0.177954	-4.43618	9.15694599499645e-06	0.000485572	-0.735817	SLC43A1	unchanged
	355	ENSG00000092421	0.187543	-4.21811	2.46354264684719e-05	0.00112822	-0.731871	SEMA6A	unchanged
	356	ENSG00000269821	0.15602	-5.08889	3.60170466539275e-07	2.7689731891411e-05	-0.751851	KCNQ1OT1	unchanged
	357	ENSG00000167695	0.210292	-3.81144	0.000138162	0.00480007	-0.727587	TLCD3A	unchanged
	358	ENSG00000141504	0.208497	-3.85476	0.000115843	0.00413728	-0.730582	SAT2	unchanged
	359	ENSG00000167693	0.18567	-4.38212	1.1752857930399e-05	0.000603177	-0.753824	NXN	unchanged
	360	ENSG00000066279	0.164879	-4.97728	6.44845612162016e-07	4.69364241582413e-05	-0.772359	ASPM	unchanged
	361	ENSG00000132507	0.177813	-4.62626	3.72324884707405e-06	0.00022343	-0.766847	EIF5A	unchanged
	362	ENSG00000167699	0.200693	-4.09975	4.13593222354557e-05	0.00173248	-0.75309	GLOD4	unchanged
	363	ENSG00000149136	0.127046	-6.47968	9.19202359643733e-11	1.32302938125263e-08	-0.793743	SSRP1	unchanged
	364	ENSG00000210082	0.142374	-5.81428	6.08955528306248e-09	6.89777259074941e-07	-0.790921	NA	unchanged
	365	ENSG00000108055	0.164156	-5.05128	4.38850921781729e-07	3.28161062330767e-05	-0.780804	SMC3	unchanged
	366	ENSG00000174498	0.18487	-4.4861	7.25402212689685e-06	0.000406034	-0.768876	IGDCC3	unchanged
	367	ENSG00000119927	0.188738	-4.40479	1.05885265850745e-05	0.000546351	-0.768368	GPAM	unchanged
	368	ENSG00000148843	0.143582	-5.79905	6.66921123969549e-09	7.50992416244063e-07	-0.794949	PDCD11	unchanged
	369	ENSG00000220205	0.233189	-3.58916	0.000331739	0.00997418	-0.743891	VAMP2	unchanged
	370	ENSG00000007168	0.163314	-5.12812	2.92654615783723e-07	2.27735256501944e-05	-0.789107	PAFAH1B1	unchanged
	371	ENSG00000211459	0.125784	-6.66194	2.70235740282279e-11	4.31093564685305e-09	-0.808537	NA	unchanged
	372	ENSG00000011295	0.201178	-4.1688	3.06210408997996e-05	0.00136004	-0.767202	TTC19	unchanged
	373	ENSG00000170558	0.194534	-4.33207	1.47715682564667e-05	0.000721357	-0.775272	CDH2	unchanged
	374	ENSG00000233098	0.164265	-5.13354	2.84343892664331e-07	2.22171230092787e-05	-0.793985	LOC339260	unchanged
	375	ENSG00000188042	0.184112	-4.61679	3.89712366606381e-06	0.000232407	-0.788564	ARL4C	unchanged
	376	ENSG00000281398	0.20656	-4.12261	3.74596459038995e-05	0.00160423	-0.775522	NA	unchanged
	377	ENSG00000210049	0.233664	-3.65983	0.000252384	0.00795945	-0.75972	NA	unchanged
	378	ENSG00000187122	0.208986	-4.11854	3.8127943956912e-05	0.0016285	-0.782062	SLIT1	unchanged
	379	ENSG00000143333	0.235754	-3.65333	0.00025886	0.00813689	-0.763767	RGS16	unchanged
	380	ENSG00000187607	0.231214	-3.73741	0.000185924	0.00623318	-0.769579	ZNF286A	unchanged
	381	ENSG00000145423	0.212935	-4.1004	4.12444374703719e-05	0.00173167	-0.790743	SFRP2	unchanged
	382	ENSG00000133026	0.132336	-6.61613	3.68711788108201e-11	5.69695849332467e-09	-0.841646	MYH10	unchanged
	383	ENSG00000107566	0.233629	-3.78601	0.000153083	0.00528013	-0.785914	ERLIN1	unchanged
	384	ENSG00000178921	0.159033	-5.57221	2.51524323309378e-08	2.45659700056705e-06	-0.837469	PFAS	unchanged
	385	ENSG00000050628	0.176433	-5.02465	5.04354017404341e-07	3.71340344429666e-05	-0.827303	PTGER3	unchanged
	386	ENSG00000166197	0.172665	-5.17002	2.34068157790432e-07	1.88267510276565e-05	-0.835404	NOLC1	unchanged
	387	ENSG00000170049	0.217563	-4.11297	3.90596551717167e-05	0.00165425	-0.807032	KCNAB3	unchanged
	388	ENSG00000141030	0.200773	-4.46445	8.02743005734875e-06	0.000440313	-0.820303	COPS3	unchanged
	389	ENSG00000144589	0.235512	-3.80648	0.000140961	0.0048796	-0.795115	STK11IP	unchanged
	390	ENSG00000228253	0.193769	-4.63635	3.54612462674289e-06	0.00021347	-0.826954	ATP8	unchanged
	391	ENSG00000107833	0.199008	-4.53021	5.89264405561996e-06	0.000338747	-0.826268	NPM3	unchanged
	392	ENSG00000138111	0.204544	-4.41556	1.00747703618502e-05	0.00052408	-0.823807	MFSD13A	unchanged
	393	ENSG00000171517	0.193442	-4.7209	2.34805840261842e-06	0.000148829	-0.840794	LPAR3	unchanged
	394	ENSG00000117394	0.200432	-4.60442	4.13625787535413e-06	0.000243632	-0.844894	SLC2A1	unchanged
	395	ENSG00000185722	0.207342	-4.48658	7.23742452569626e-06	0.000406034	-0.846578	ANKFY1	unchanged
	396	ENSG00000146013	0.253456	-3.67695	0.000236042	0.00763268	-0.811972	GFRA3	unchanged
	397	ENSG00000065559	0.228626	-4.11813	3.81964955008948e-05	0.0016285	-0.840518	MAP2K4	unchanged
	398	ENSG00000166579	0.230042	-4.09773	4.17226811485069e-05	0.001741	-0.840475	NDEL1	unchanged
	399	ENSG00000006744	0.169723	-5.58637	2.3186332759553e-08	2.31174983341731e-06	-0.889182	ELAC2	unchanged
	400	ENSG00000179409	0.186912	-5.10554	3.29859415142753e-07	2.5564772405173e-05	-0.883345	GEMIN4	unchanged
	401	ENSG00000272572	0.228644	-4.18089	2.90365906296238e-05	0.00131096	-0.853338	NA	unchanged
	402	ENSG00000064042	0.149214	-6.46843	9.90277509302009e-11	1.41469271347525e-08	-0.918177	LIMCH1	unchanged
	403	ENSG00000167721	0.159975	-6.04589	1.48587247551455e-09	1.82129274877084e-07	-0.913429	TSR1	unchanged
	404	ENSG00000101638	0.252877	-3.83516	0.000125481	0.0044156	-0.845565	ST8SIA5	unchanged
	405	ENSG00000169439	0.207229	-4.68269	2.83136290823405e-06	0.000172614	-0.883217	SDC2	unchanged
	406	ENSG00000171861	0.24742	-3.932	8.42424471466793e-05	0.00313746	-0.852766	MRM3	unchanged
	407	ENSG00000205544	0.239381	-4.0911	4.29330423676307e-05	0.00177893	-0.865404	TMEM256	unchanged
	408	ENSG00000153976	0.200092	-4.94175	7.74249094266103e-07	5.42910271484835e-05	-0.905425	HS3ST3A1	unchanged
	409	ENSG00000107957	0.266279	-3.71845	0.000200447	0.00663869	-0.8512	SH3PXD2A	unchanged
	410	ENSG00000143842	0.256333	-3.87122	0.000108291	0.00391134	-0.86226	SOX13	unchanged
	411	ENSG00000167703	0.202989	-4.91243	8.9956773517959e-07	6.19439753760536e-05	-0.910769	SLC43A2	unchanged
	412	ENSG00000143870	0.219476	-4.54812	5.41261803815199e-06	0.000313981	-0.898638	PDIA6	unchanged
	413	ENSG00000106829	0.194782	-5.15209	2.5760543934084e-07	2.02104136282856e-05	-0.923041	TLE4	unchanged
	414	ENSG00000108559	0.255842	-3.93119	8.45277383122635e-05	0.00314197	-0.874199	NUP88	unchanged
	415	ENSG00000109929	0.200595	-5.03869	4.68722952019296e-07	3.47781529864549e-05	-0.925164	SC5D	unchanged
	416	ENSG00000100867	0.197018	-5.19436	2.05426872042016e-07	1.67339855808524e-05	-0.939542	DHRS2	unchanged
	417	ENSG00000159167	0.256522	-3.99163	6.56198915892408e-05	0.00253258	-0.88931	STC1	unchanged
	418	ENSG00000120278	0.239507	-4.31901	1.56733592927491e-05	0.000757664	-0.914018	PLEKHG1	unchanged
	419	ENSG00000273759	0.279076	-3.70891	0.000208156	0.00687021	-0.877856	NA	unchanged
	420	ENSG00000210164	0.27699	-3.74512	0.000180304	0.00608741	-0.88143	NA	unchanged
	421	ENSG00000141510	0.257257	-4.10229	4.09089819638005e-05	0.00172494	-0.91591	TP53	unchanged
	422	ENSG00000177106	0.263243	-4.01295	5.99645103706373e-05	0.00234265	-0.91093	EPS8L2	unchanged
	423	ENSG00000179029	0.18968	-5.56939	2.55627387524914e-08	2.47145206029769e-06	-0.975613	TMEM107	unchanged
	424	ENSG00000038427	0.158847	-6.68384	2.3276579544388e-11	3.74439968250604e-09	-1.00349	VCAN	down
	425	ENSG00000054983	0.244647	-4.36022	1.29933108826961e-05	0.000654555	-0.937594	GALC	unchanged
	426	ENSG00000187498	0.296471	-3.60399	0.000313375	0.00952997	-0.889014	COL4A1	unchanged
	427	ENSG00000100505	0.289248	-3.69632	0.000218751	0.00717045	-0.896879	TRIM9	unchanged
	428	ENSG00000229015	0.24089	-4.44645	8.7299112416969e-06	0.000470751	-0.945054	LOC100506790	unchanged
	429	ENSG00000184489	0.244784	-4.43536	9.19205731039668e-06	0.000486087	-0.954055	PTP4A3	unchanged
	430	ENSG00000149115	0.16893	-6.49254	8.44019325739249e-11	1.23336350783408e-08	-1.02921	TNKS1BP1	down
	431	ENSG00000108061	0.231632	-4.77919	1.76002706436031e-06	0.000113442	-0.985406	SHOC2	unchanged
	432	ENSG00000116014	0.206833	-5.36588	8.05555503488965e-08	7.13923564967095e-06	-1.01032	KISS1R	down
	433	ENSG00000160097	0.304317	-3.67253	0.000240163	0.00770713	-0.921043	FNDC5	unchanged
	434	ENSG00000110092	0.230877	-4.91809	8.73942862721008e-07	6.03967083793078e-05	-1.01164	CCND1	down
	435	ENSG00000119986	0.290761	-3.91293	9.11842080789428e-05	0.00335681	-0.952262	AVPI1	unchanged
	436	ENSG00000160991	0.286422	-3.97585	7.0127768591652e-05	0.00268491	-0.958113	ORAI2	unchanged
	437	ENSG00000164818	0.289212	-3.94262	8.0597936301676e-05	0.00301935	-0.956303	DNAAF5	unchanged
	438	ENSG00000072134	0.284096	-4.01586	5.92306496125129e-05	0.00231872	-0.96219	EPN2	unchanged
	439	ENSG00000238113	0.297307	-3.84113	0.000122468	0.00431752	-0.949399	LINC01410	unchanged
	440	ENSG00000198062	0.318465	-3.64774	0.00026456	0.00827527	-0.942079	POTEH	unchanged
	441	ENSG00000157992	0.192267	-6.08877	1.13784184355181e-09	1.4143965202021e-07	-1.07896	KRTCAP3	down
	442	ENSG00000212464	0.313641	-3.74186	0.000182665	0.00615626	-0.957237	SNORA12	unchanged
	443	ENSG00000205927	0.214598	-5.47385	4.40362371506958e-08	4.15263885603827e-06	-1.06214	OLIG2	down
	444	ENSG00000120885	0.1469	-8.15936	3.36804698048915e-16	1.02340513250006e-13	-1.14191	CLU	down
	445	ENSG00000174721	0.247173	-4.86329	1.15451462033067e-06	7.72757810384268e-05	-1.05378	FGFBP3	down
	446	ENSG00000269609	0.173196	-6.96381	3.31184792309199e-12	5.98100988601414e-10	-1.12826	C10orf95-AS1	down
	447	ENSG00000149257	0.154409	-7.86306	3.74852964970446e-15	1.03997250846801e-12	-1.15102	SERPINH1	down
	448	ENSG00000128739	0.184638	-6.59814	4.1635925881013e-11	6.37629223312186e-09	-1.12964	SNRPN	down
	449	ENSG00000198920	0.319552	-3.81771	0.000134699	0.00472259	-0.988287	KIAA0753	unchanged
	450	ENSG00000177602	0.293212	-4.1775	2.94727303739633e-05	0.0013213	-1.02273	HASPIN	down
	451	ENSG00000132535	0.329141	-3.72192	0.000197712	0.00655945	-0.980067	DLG4	unchanged
	452	ENSG00000102290	0.323096	-3.80505	0.000141773	0.00489886	-0.991293	PCDH11X	unchanged
	453	ENSG00000165215	0.29091	-4.2846	1.83066665781739e-05	0.000858933	-1.04319	CLDN3	down
	454	ENSG00000130768	0.295357	-4.33149	1.48103188369114e-05	0.000721409	-1.06538	SMPDL3B	down
	455	ENSG00000189184	0.275564	-4.66262	3.12214638015099e-06	0.000189137	-1.09404	PCDH18	down
	456	ENSG00000170421	0.351488	-3.6606	0.000251623	0.00795945	-1.00176	KRT8	down
	457	ENSG00000272277	0.302836	-4.29339	1.75966818858678e-05	0.000831736	-1.07413	NA	down
	458	ENSG00000188219	0.2877	-4.5222	6.12012874251747e-06	0.000350771	-1.09344	POTEE	down
	459	ENSG00000129244	0.32673	-3.99186	6.55578026972108e-05	0.00253258	-1.04768	ATP1B2	down
	460	ENSG00000162755	0.30619	-4.35374	1.33833610641582e-05	0.000672435	-1.09647	KLHDC9	down
	461	ENSG00000054179	0.267073	-5.03003	4.90398821086359e-07	3.62459638303327e-05	-1.15436	ENTPD2	down
	462	ENSG00000223572	0.275378	-4.88426	1.03819375705511e-06	7.0475684720943e-05	-1.14505	CKMT1A	down
	463	ENSG00000152661	0.286785	-4.72694	2.27930214293367e-06	0.000145442	-1.14022	GJA1	down
	464	ENSG00000118523	0.282828	-4.81169	1.49658472916341e-06	9.81134296930659e-05	-1.14979	CCN2	down
	465	ENSG00000183186	0.263967	-5.16335	2.42566614843957e-07	1.93477196164911e-05	-1.17441	C2CD4C	down
	466	ENSG00000176974	0.301224	-4.54925	5.38369594363634e-06	0.000313253	-1.13397	SHMT1	down
	467	ENSG00000128567	0.259975	-5.29158	1.21266720276048e-07	1.03173725610861e-05	-1.19056	PODXL	down
	468	ENSG00000111859	0.271078	-5.15504	2.53579148513754e-07	2.00890842956145e-05	-1.1956	NEDD9	down
	469	ENSG00000162444	0.216051	-6.48356	8.95822424342139e-11	1.29914611130163e-08	-1.265	RBP7	down
	470	ENSG00000106538	0.253072	-5.58013	2.4033581175398e-08	2.38263448524743e-06	-1.23079	RARRES2	down
	471	ENSG00000188536	0.351483	-4.05371	5.04125306856022e-05	0.00204027	-1.11025	HBA2	down
	472	ENSG00000282048	0.33935	-4.20026	2.66614248682355e-05	0.0012123	-1.1261	NA	down
	473	ENSG00000108474	0.243058	-5.8861	3.95420853940534e-09	4.5599647030022e-07	-1.25989	PIGL	down
	474	ENSG00000210077	0.328001	-4.36603	1.2652666407662e-05	0.000640767	-1.14711	NA	down
	475	ENSG00000175061	0.195567	-7.40284	1.33299678930486e-13	3.23007057438771e-11	-1.33073	SNHG29	down
	476	ENSG00000108947	0.348809	-4.17382	2.99531716492505e-05	0.0013397	-1.13767	EFNB3	down
	477	ENSG00000237289	0.38373	-3.81613	0.000135559	0.00473541	-1.09351	CKMT1B	down
	478	ENSG00000255794	0.400536	-3.6601	0.000252113	0.00795945	-1.07045	RMST	down
	479	ENSG00000170412	0.334101	-4.45331	8.45575662425035e-06	0.000457256	-1.18366	GPRC5C	down
	480	ENSG00000116774	0.160421	-9.29038	1.5373906326379e-20	6.54005975124163e-18	-1.40709	OLFML3	down
	481	ENSG00000174938	0.260221	-5.75205	8.81662886633536e-09	9.6443843650433e-07	-1.29473	SEZ6L2	down
	482	ENSG00000128487	0.243126	-6.2088	5.33902489316994e-10	6.81366356866348e-08	-1.32888	SPECC1	down
	483	ENSG00000258743	0.334941	-4.56991	4.8794053944325e-06	0.000285647	-1.21777	LINC02301	down
	484	ENSG00000170074	0.371134	-4.14701	3.36850961822075e-05	0.00147222	-1.16973	FAM153A	down
	485	ENSG00000102265	0.35478	-4.43379	9.25910844554278e-06	0.000486951	-1.21985	TIMP1	down
	486	ENSG00000170549	0.28056	-5.67113	1.41857291982504e-08	1.50865230023393e-06	-1.34742	IRX1	down
	487	ENSG00000108590	0.338975	-4.72024	2.35569519311111e-06	0.000148829	-1.26456	MED31	down
	488	ENSG00000170222	0.397348	-4.03115	5.550399856324e-05	0.00219075	-1.17586	ADPRM	down
	489	ENSG00000156925	0.220148	-7.3723	1.67708272827858e-13	3.96350551449837e-11	-1.46032	ZIC3	down
	490	ENSG00000210140	0.302816	-5.36673	8.01780635448821e-08	7.13883102530083e-06	-1.34146	NA	down
	491	ENSG00000139318	0.433587	-3.81457	0.000136421	0.00475683	-1.15666	DUSP6	down
	492	ENSG00000159182	0.14779	-11.2959	1.37517139587621e-29	9.40175215402084e-27	-1.58957	PRAC1	down
	493	ENSG00000132692	0.388437	-4.31471	1.59814667250623e-05	0.000770613	-1.24561	BCAN	down
	494	ENSG00000134709	0.249203	-6.79982	1.04750898316098e-11	1.74369256214354e-09	-1.48286	HOOK1	down
	495	ENSG00000119888	0.390874	-4.37129	1.2351580922279e-05	0.000627179	-1.2649	EPCAM	down
	496	ENSG00000136859	0.349084	-4.95149	7.36464063904069e-07	5.22153021307985e-05	-1.35137	ANGPTL2	down
	497	ENSG00000169174	0.309361	-5.66472	1.47262647301908e-08	1.55748555651957e-06	-1.4362	PCSK9	down
	498	ENSG00000064547	0.363116	-4.827	1.38603082256838e-06	9.11779657609161e-05	-1.3455	LPAR2	down
	499	ENSG00000284668	0.196597	-9.03153	1.69291919922719e-19	6.75157338141795e-17	-1.63037	LINC02780	down
	500	ENSG00000214548	0.483781	-3.67545	0.000237431	0.00765628	-1.1505	MEG3	down
	501	ENSG00000178919	0.408006	-4.46876	7.8674625099822e-06	0.000434025	-1.32005	FOXE1	down
	502	ENSG00000112238	0.390712	-4.68399	2.81340640440043e-06	0.000172067	-1.35529	PRDM13	down
	503	ENSG00000229051	0.461726	-3.97159	7.13951651194424e-05	0.00271174	-1.22945	LINC01788	down
	504	ENSG00000132386	0.342056	-5.4672	4.57211426205095e-08	4.29039133913928e-06	-1.47412	SERPINF1	down
	505	ENSG00000133169	0.264822	-7.10922	1.16697883862372e-12	2.35152377976567e-10	-1.62183	BEX1	down
	506	ENSG00000203867	0.258952	-7.38109	1.57002442642834e-13	3.75687219938971e-11	-1.65662	RBM20	down
	507	ENSG00000171345	0.393195	-4.89799	9.68199094960102e-07	6.63536513044562e-05	-1.42078	KRT19	down
	508	ENSG00000130203	0.336694	-5.77357	7.76096133908052e-09	8.53839556977117e-07	-1.54154	APOE	down
	509	ENSG00000224078	0.136165	-14.4567	2.27519322422324e-47	3.11100170652182e-44	-1.88794	NA	down
	510	ENSG00000128564	0.443729	-4.45472	8.40020051406153e-06	0.000455538	-1.36321	VGF	down
	511	ENSG00000130635	0.306224	-6.49841	8.11750268048165e-11	1.20904759710533e-08	-1.63684	COL5A1	down
	512	ENSG00000132205	0.460203	-4.33509	1.45702709373775e-05	0.000718863	-1.34011	EMILIN2	down
	513	ENSG00000113140	0.403329	-4.95691	7.16226189076237e-07	5.09692116635183e-05	-1.4564	SPARC	down
