# Supplementary material for: The domesticated transposon protein L1TD1 associates with its ancestor L1 ORF1p to promote LINE-1 retrotransposition
Source: eLife. 2025 Mar 20;13:RP96850. doi: 10.7554/eLife.96850 (PMC11925450; doi:10.7554/eLife.96850)
Supplement: Figure 4—figure supplement 1—source data 1. [file elife-96850-fig4-figsupp1-data1.xlsx]

## Sheet: 4S1A exp1
Colony numbers per 10^6 cells		Unpaired t test of Colony numbers per 10^6 cells
KO	DKO	Table Analyzed	4th Colony numbers per 10^6 cells
593	109
657	115	Column B	DKO
702	117	vs.	vs.
		Column A	KO
		Unpaired t test
		P value	<0.0001
		P value summary	****
		Significantly different (P < 0.05)?	Yes
		One- or two-tailed P value?	Two-tailed
		t, df	t=16.93, df=4
		How big is the difference?
		Mean of column A	650.7
		Mean of column B	113.7
		Difference between means (B - A) ± SEM	-537.0 ± 31.72
		95% confidence interval	-625.1 to -448.9
		R squared (eta squared)	0.9862
		F test to compare variances
		F, DFn, Dfd	173.1, 2, 2
		P value	0.0115
		P value summary	*
		Significantly different (P < 0.05)?	Yes
		Data analyzed
		Sample size, column A	3
		Sample size, column B	3

## Sheet: 4S1A exp2
		Unpaired t test of 1st Colony numbers per 10^6 cells
		Table Analyzed	1st Colony numbers per 10^6 cells
		Column B	DKO
		vs.	vs.
		Column A	KO
Colony numbers per 10^6 cells		Unpaired t test
KO	DKO	P value	0.0015
332	37	P value summary	**
295	31	Significantly different (P < 0.05)?	Yes
222	12	One- or two-tailed P value?	Two-tailed
		t, df	t=7.725, df=4
		How big is the difference?
		Mean of column A	283
		Mean of column B	26.67
		Difference between means (B - A) ± SEM	-256.3 ± 33.18
		95% confidence interval	-348.5 to -164.2
		R squared (eta squared)	0.9372
		F test to compare variances
		F, DFn, Dfd	18.39, 2, 2
		P value	0.1031
		P value summary	ns
		Significantly different (P < 0.05)?	No
		Data analyzed
		Sample size, column A	3
		Sample size, column B	3

## Sheet: 4S1A exp3
Colony numbers per 10^6 cells		Unpaired t test of Colony numbers per 10^6 cells
KO	DKO	Table Analyzed	2nd Colony numbers per 10^6 cells
567	111
590	111	Column B	DKO
567	119	vs.	vs.
		Column A	KO
		Unpaired t test
		P value	<0.0001
		P value summary	****
		Significantly different (P < 0.05)?	Yes
		One- or two-tailed P value?	Two-tailed
		t, df	t=56.79, df=4
		How big is the difference?
		Mean of column A	574.7
		Mean of column B	113.7
		Difference between means (B - A) ± SEM	-461.0 ± 8.117
		95% confidence interval	-483.5 to -438.5
		R squared (eta squared)	0.9988
		F test to compare variances
		F, DFn, Dfd	8.266, 2, 2
		P value	0.2159
		P value summary	ns
		Significantly different (P < 0.05)?	No
		Data analyzed
		Sample size, column A	3
		Sample size, column B	3
