# Supplementary material for: The domesticated transposon protein L1TD1 associates with its ancestor L1 ORF1p to promote LINE-1 retrotransposition
Source: eLife. 2025 Mar 20;13:RP96850. doi: 10.7554/eLife.96850 (PMC11925450; doi:10.7554/eLife.96850)
Supplement: Figure 4—source data 1. [file elife-96850-fig4-data1.xlsx]

## Sheet: 4C
		Unpaired t test of 1-2-3 combined per 10^6 cells
1-2-3 combined per 10^6 cells		Table Analyzed	1-2-4 combined per 10^6 cells
KO	DKO
593	109	Column B	DKO
657	115	vs.	vs.
702	117	Column A	KO
332	37
295	31	Unpaired t test
222	12	P value	<0.0001
567	111	P value summary	****
590	111	Significantly different (P < 0.05)?	Yes
567	119	One- or two-tailed P value?	Two-tailed
		t, df	t=7.037, df=16
		How big is the difference?
		Mean of column A	502.8
		Mean of column B	84.67
		Difference between means (B - A) ± SEM	-418.1 ± 59.42
		95% confidence interval	-544.1 to -292.1
		R squared (eta squared)	0.7558
		F test to compare variances
		F, DFn, Dfd	15.34, 8, 8
		P value	0.0008
		P value summary	***
		Significantly different (P < 0.05)?	Yes
		Data analyzed
		Sample size, column A	9
		Sample size, column B	9
