# Supplementary material for: The domesticated transposon protein L1TD1 associates with its ancestor L1 ORF1p to promote LINE-1 retrotransposition
Source: eLife. 2025 Mar 20;13:RP96850. doi: 10.7554/eLife.96850 (PMC11925450; doi:10.7554/eLife.96850)
Supplement: Supplementary file 1. [file elife-96850-supp1.xlsx]

## Sheet: info
RNA sequencing of control, DNMT1 knockout and DNMT1/L1TD1 double knockout haploid cells (HAP1)
Homo sapiens
Expression profiling by high throughput sequencing
To investigate the effects of L1TD1 ablation in DNMT1 knockout HAP-1 cells in comparison to DNMT1 knockout and control HAP1 cells
Overall desgn
For RNA sequencing three control, three DNMT1 Knockout and three DNMT1/L1TD1 double knockout samples were isolated and RNA was and then used for RNA sequencing. The aim was to do the analysis of differentially expressed genes across the three conditions to determine the effects of L1TD1 ablation in DNMT1 knockout HAP1 cells and in comparison to control cells.
Repeat samples were performed using the original libraries run in a separate lane. They were later merged in the analysis.
GSE169614

## Sheet: DNMT1 KO_vs_WT
ensembl	baseMean	log2FoldChange	lfcSE	stat	pvalue	padj	entrez.first	entrez.count	concatenated	GENENAME.first	GENENAME.concat	REFSEQ.first	REFSEQ.concat
ENSG00000147381	5036.23	8.8688	0.186846	47.4658	0	0	4103	1	4103	melanoma antigen family A4	melanoma antigen family A4	NM_001011548	NM_001011548,NM_001011549,NM_001011550,NM_002362,NP_001011548,NP_001011549,NP_001011550,NP_002353,XM_005274677,XM_005274678,XM_005274679,XP_005274734,XP_005274735,XP_005274736
ENSG00000198883	5837.45	8.61554	0.186551	46.1834	0	0	114824	1	114824	paraneoplastic Ma antigen family member 5	paraneoplastic Ma antigen family member 5	NM_001103150	NM_001103150,NM_001103151,NM_001184924,NM_052926,NP_001096620,NP_001096621,NP_001171853,NP_443158
ENSG00000099399	2651.18	8.31536	0.193513	42.9705	0	0	4113	1	4113	melanoma antigen family B2	melanoma antigen family B2	NM_002364	NM_002364,NP_002355,XM_011545512,XP_011543814
ENSG00000213401	2522.04	8.24539	0.193886	42.527	0	0	4111	1	4111	melanoma antigen family A12	melanoma antigen family A12	NM_001166386	NM_001166386,NM_001166387,NM_005367,NP_001159858,NP_001159859,NP_005358
ENSG00000221867	1843.97	7.90407	0.197904	39.939	0	0	4102	1	4102	melanoma antigen family A3	melanoma antigen family A3	NM_005362	NM_005362,NP_005353,XM_005274676,XM_006724818,XM_011531160,XM_011531161,XP_005274733,XP_006724881,XP_011529462,XP_011529463
ENSG00000189060	4097.06	7.72837	0.191073	40.4472	0	0	3005	1	3005	H1 histone family, member 0	H1 histone family, member 0	NM_005318	NM_005318,NP_005309
ENSG00000197172	1601.35	7.6626	0.20092	38.1376	0	0	4105	1	4105	melanoma antigen family A6	melanoma antigen family A6	NM_005363	NM_005363,NM_175868,NP_005354,NP_787064,XM_011531162,XP_011529464
ENSG00000126890	1554.83	7.40099	0.200628	36.889	6.92583e-298	6.23245e-295	30848	1	30848	cancer/testis antigen 2	cancer/testis antigen 2	NM_020994	NM_020994,NM_172377,NP_066274,NP_758965
ENSG00000143194	2268.78	7.36093	0.196423	37.4749	2.35996e-307	2.50982e-304	84944	1	84944	maelstrom spermatogenic transposon silencer	maelstrom spermatogenic transposon silencer	NM_001286377	NM_001286377,NM_001286378,NM_032858,NP_001273306,NP_001273307,NP_116247,XM_006711582,XM_006711583,XM_011510067,XM_011510068,XP_006711645,XP_006711646,XP_011508369,XP_011508370
ENSG00000176087	1417.74	7.34182	0.198389	37.0072	8.78035e-300	8.21736e-297	113829	1	113829	solute carrier family 35, member A4	solute carrier family 35, member A4	NM_080670	NM_080670,NP_542401
ENSG00000124092	680.387	7.18778	0.209561	34.2992	8.05299e-258	5.09232e-255	140690	1	140690	CCCTC-binding factor (zinc finger protein)-like	CCCTC-binding factor (zinc finger protein)-like	NM_001269040	NM_001269040,NM_001269041,NM_001269042,NM_001269043,NM_001269044,NM_001269045,NM_001269046,NM_001269047,NM_001269048,NM_001269049,NM_001269050,NM_001269051,NM_001269052,NM_001269054,NM_001269055,NM_080618,NP_001255969,NP_001255970,NP_001255971,NP_001255972,NP_001255973,NP_001255974,NP_001255975,NP_001255976,NP_001255977,NP_001255978,NP_001255979,NP_001255980,NP_001255981,NP_001255983,NP_001255984…
ENSG00000100867	3639.92	7.06778	0.099222	71.232	0	0	10202	1	10202	dehydrogenase/reductase (SDR family) member 2	dehydrogenase/reductase (SDR family) member 2	NM_005794	NM_005794,NM_182908,NP_005785,NP_878912,XM_005267249,XM_006720000,XM_006720001,XM_006720002,XM_011536338,XM_011536339,XP_005267306,XP_006720063,XP_006720064,XP_006720065,XP_011534640,XP_011534641,XR_943366,XR_943367
ENSG00000214107	922.277	7.00674	0.206317	33.961	8.38298e-253	5.02914e-250	4112	1	4112	melanoma antigen family B1	melanoma antigen family B1	NM_002363	NM_002363,NM_177404,NM_177415,NP_002354,NP_796379,NP_803134
ENSG00000124260	956.067	6.92345	0.204869	33.7945	2.3726e-250	1.35394e-247	4109	1	4109	melanoma antigen family A10	melanoma antigen family A10	NM_001011543	NM_001011543,NM_001251828,NM_021048,NP_001011543,NP_001238757,NP_066386
ENSG00000141096	259.1	6.63507	0.238488	27.8214	2.39047e-170	6.50346e-168	64180	1	64180	dipeptidase 3	dipeptidase 3	NM_001129758	NM_001129758,NM_022357,NP_001123230,NP_071752
ENSG00000069482	977.11	6.60498	0.207418	31.8438	1.60441e-222	7.82052e-220	51083	1	51083	galanin/GMAP prepropeptide	galanin/GMAP prepropeptide	NM_015973	NM_015973,NP_057057
ENSG00000100285	758.442	6.58647	0.209918	31.3764	4.25262e-216	1.95095e-213	4744	1	4744	neurofilament, heavy polypeptide	neurofilament, heavy polypeptide	NM_021076	NM_021076,NP_066554,XM_011530200,XP_011528502
ENSG00000198930	602.41	6.43258	0.212482	30.2735	2.56101e-201	9.98667e-199	158511	1	158511	chondrosarcoma associated gene 1	chondrosarcoma associated gene 1	NM_001102576	NM_001102576,NM_153478,NM_153479,NP_001096046,NP_705611
ENSG00000106624	732.189	6.32665	0.194083	32.5977	4.42406e-233	2.30022e-230	165	1	165	AE binding protein 1	AE binding protein 1	NM_001129	NM_001129,NP_001120,XM_011515162,XP_011513464
ENSG00000007038	230.223	6.27055	0.236119	26.5567	2.14854e-155	5.02693e-153	10942	1	10942	protease, serine, 21 (testisin)	protease, serine, 21 (testisin)	NM_001270452	NM_001270452,NM_006799,NM_144956,NM_144957,NP_001257381,NP_006790,NP_659205,NP_659206,NR_073012
ENSG00000198467	2575.75	6.17469	0.111253	55.5015	0	0	7169	1	7169	tropomyosin 2 (beta)	tropomyosin 2 (beta)	NM_001145822	NM_001145822,NM_001301226,NM_001301227,NM_003289,NM_213674,NP_001288155,NP_001288156,NP_003280,NP_998839,XR_929320,XR_929321,XR_929322,XR_929323,XR_929324,XR_929325
ENSG00000265843	499.335	6.16321	0.215233	28.635	2.46125e-180	7.88846e-178	101927715	1	101927715	long intergenic non-protein coding RNA 1029	long intergenic non-protein coding RNA 1029	NR_104127	NR_104127
ENSG00000185686	2759.47	6.15371	0.109558	56.1686	0	0	23532	1	23532	preferentially expressed antigen in melanoma	preferentially expressed antigen in melanoma	NM_001291715	NM_001291715,NM_001291716,NM_001291717,NM_001291719,NM_006115,NM_206953,NM_206954,NM_206955,NM_206956,NP_001278644,NP_001278645,NP_001278646,NP_001278648,NP_006106,NP_996836,NP_996837,NP_996838,NP_996839,XM_011530034,XM_011530035,XM_011546897,XM_011546898,XP_011528336,XP_011528337,XP_011545199,XP_011545200
ENSG00000123407	651.213	6.14281	0.201985	30.4122	3.7862e-203	1.52734e-200	3228	1	3228	homeobox C12	homeobox C12	NM_173860	NM_173860,NP_776272
ENSG00000165905	418.879	6.12926	0.215493	28.443	5.95242e-178	1.83249e-175	120071	1	120071	glycosyltransferase-like 1B	glycosyltransferase-like 1B	NM_001300721	NM_001300721,NM_001300722,NM_152312,NP_001287650,NP_001287651,NP_689525,XM_005252787,XM_006718140,XM_006718141,XM_011519886,XM_011519887,XM_011519888,XM_011519889,XM_011519890,XM_011519891,XM_011519892,XM_011519893,XP_005252844,XP_006718203,XP_006718204,XP_011518188,XP_011518189,XP_011518190,XP_011518191,XP_011518192,XP_011518193,XP_011518194,XP_011518195
ENSG00000177034	683.376	6.07838	0.211279	28.7695	5.16695e-182	1.72702e-179	345778	1	345778	metaxin 3	metaxin 3	NM_001010891	NM_001010891,NM_001167741,NP_001010891,NP_001161213,XM_005248495,XP_005248552
ENSG00000198681	561.468	6.0024	0.214562	27.9752	3.25601e-172	9.52261e-170	4100	1	4100	melanoma antigen family A1	melanoma antigen family A1	NM_004988	NM_004988,NP_004979
ENSG00000196793	368.119	5.97788	0.220588	27.0998	9.91095e-162	2.52051e-159	8187	1	8187	zinc finger protein 239	zinc finger protein 239	NM_001099282	NM_001099282,NM_001099283,NM_001099284,NM_005674,NP_001092752,NP_001092753,NP_001092754,NP_005665,XM_005271828,XM_005271829,XM_005271831,XM_005271832,XM_006718001,XM_006718002,XM_006718003,XM_011540232,XM_011540233,XM_011540234,XM_011540235,XM_011540236,XM_011540237,XM_011540238,XP_005271885,XP_005271886,XP_005271888,XP_005271889,XP_006718064,XP_006718065,XP_006718066,XP_011538534,XP_011538535,XP…
ENSG00000168077	329.004	5.97763	0.223391	26.7586	9.81966e-158	2.44415e-155	51435	1	51435	scavenger receptor class A, member 3	scavenger receptor class A, member 3	NM_016240	NM_016240,NM_182826,NP_057324,NP_878185,XM_011544555,XM_011544556,XM_011544557,XP_011542857,XP_011542858,XP_011542859,XR_949419
ENSG00000013297	654.933	5.94987	0.193526	30.7446	1.44217e-207	6.24861e-205	5010	1	5010	claudin 11	claudin 11	NM_001185056	NM_001185056,NM_005602,NP_001171985,NP_005593
ENSG00000072041	121.564	5.94898	0.264575	22.4851	5.812e-112	7.31093e-110	55117	1	55117	solute carrier family 6 (neutral amino acid transporter), member 15	solute carrier family 6 (neutral amino acid transporter), member 15	NM_001146335	NM_001146335,NM_018057,NM_182767,NP_001139807,NP_060527,NP_877499,XM_011538523,XM_011538524,XM_011538525,XP_011536825,XP_011536826,XP_011536827
ENSG00000188725	743.593	5.92267	0.207994	28.4752	2.37489e-178	7.40872e-176	643155	1	643155	small integral membrane protein 15	small integral membrane protein 15	NM_001048249	NM_001048249,NP_001041714
ENSG00000185247	424.271	5.77335	0.216849	26.6238	3.59645e-156	8.58633e-154	4110	1	4110	melanoma antigen family A11	melanoma antigen family A11	NM_001011544	NM_001011544,NM_005366,NP_001011544,NP_005357,XM_011531163,XM_011531164,XP_011529465,XP_011529466
ENSG00000144468	381.174	5.75887	0.217544	26.4723	2.02204e-154	4.68412e-152	84236	1	84236	rhomboid domain containing 1	rhomboid domain containing 1	NM_001167608	NM_001167608,NM_032276,NP_001161080,NP_115652,XM_011511978,XM_011511979,XP_011510280,XP_011510281,XR_923036,XR_923037,XR_923038,XR_923039,XR_923040
ENSG00000158639	274.864	5.70971	0.226616	25.1955	4.48734e-140	8.53579e-138	90737	1	90737	P antigen family, member 5 (prostate associated)	P antigen family, member 5 (prostate associated)	NM_001013435	NM_001013435,NM_130467,NP_001013453,NP_569734
ENSG00000136110	160.893	5.69569	0.237987	23.9327	1.39777e-126	2.12361e-124	11061	1	11061	leukocyte cell derived chemotaxin 1	leukocyte cell derived chemotaxin 1	NM_001011705	NM_001011705,NM_007015,NP_001011705,NP_008946,XM_006719761,XM_011534897,XM_011534898,XM_011534899,XM_011534900,XP_006719824,XP_011533199,XP_011533200,XP_011533201,XP_011533202
ENSG00000100600	365.897	5.68699	0.220942	25.7398	4.19643e-146	8.8454e-144	5641	1	5641	legumain	legumain	NM_001008530	NM_001008530,NM_005606,NP_001008530,NP_005597,XM_005267862,XM_005267863,XM_011536970,XP_005267919,XP_005267920,XP_011535272
ENSG00000000003	944.472	5.65606	0.154807	36.5362	2.94877e-292	2.37904e-289	7105	1	7105	tetraspanin 6	tetraspanin 6	NM_001278740	NM_001278740,NM_001278741,NM_001278742,NM_001278743,NM_003270,NP_001265669,NP_001265670,NP_001265671,NP_001265672,NP_003261,XM_011531017,XM_011531018,XP_011529319,XP_011529320
ENSG00000215146	370.225	5.65527	0.219082	25.8135	6.25285e-147	1.32998e-144	441666	1	441666	zinc finger protein 91 pseudogene	zinc finger protein 91 pseudogene	NR_024380	NR_024380
ENSG00000178445	680.368	5.6458	0.202417	27.8919	3.34488e-171	9.42895e-169	2731	1	2731	glycine dehydrogenase (decarboxylating)	glycine dehydrogenase (decarboxylating)	NM_000170	NM_000170,NP_000161
ENSG00000129654	208.788	5.64277	0.230284	24.5035	1.35455e-132	2.30399e-130	2302	1	2302	forkhead box J1	forkhead box J1	NM_001454	NM_001454,NP_001445
ENSG00000145908	349.656	5.63122	0.218997	25.7137	8.20989e-146	1.71506e-143	91975	1	91975	zinc finger protein 300	zinc finger protein 300	NM_001172831	NM_001172831,NM_001172832,NM_052860,NP_001166302,NP_001166303,NP_443092,XM_006714806,XM_011537702,XM_011537703,XP_006714869,XP_011536004,XP_011536005
ENSG00000233098	418.741	5.55893	0.183059	30.3669	1.5022e-202	5.95712e-200	339260	3	3.3926e+20	uncharacterized LOC339260	uncharacterized LOC339260	NR_123730	NR_123730
ENSG00000109113	760.479	5.53122	0.155628	35.5414	1.1273e-276	7.99257e-274	83871	1	83871	RAB34, member RAS oncogene family	RAB34, member RAS oncogene family	NM_001142624	NM_001142624,NM_001142625,NM_001144942,NM_001144943,NM_001256276,NM_001256277,NM_001256278,NM_031934,NP_001136096,NP_001136097,NP_001138414,NP_001138415,NP_001243205,NP_001243206,NP_001243207,NP_114140
ENSG00000160352	478.612	5.50648	0.191863	28.7002	3.79823e-181	1.23426e-178	148206	1	148206	zinc finger protein 714	zinc finger protein 714	NM_182515	NM_182515,NP_872321,NR_117086,NR_117087,NR_117088
ENSG00000263753	388.269	5.45258	0.221037	24.6682	2.35008e-134	4.10335e-132	339290	1	339290	long intergenic non-protein coding RNA 667	long intergenic non-protein coding RNA 667	NR_015389	NR_015389
ENSG00000181291	396.962	5.38127	0.195978	27.4586	5.49016e-166	1.45969e-163	124842	1	124842	transmembrane protein 132E	transmembrane protein 132E	NM_001304438	NM_001304438,NM_207313,NP_001291367,XM_011524312,XM_011524313,XP_011522614,XP_011522615
ENSG00000167775	1096.67	5.36933	0.12881	41.684	0	0	51293	1	51293	CD320 molecule	CD320 molecule	NM_001165895	NM_001165895,NM_016579,NP_001159367,NP_057663
ENSG00000007350	593.799	5.34879	0.145945	36.6494	4.67124e-294	3.90332e-291	8277	1	8277	transketolase-like 1	transketolase-like 1	NM_001145933	NM_001145933,NM_001145934,NM_012253,NP_001139405,NP_001139406,NP_036385
ENSG00000106484	994.927	5.34711	0.159112	33.606	1.37016e-247	7.45524e-245	4232	1	4232	mesoderm specific transcript	mesoderm specific transcript	NM_001253900	NM_001253900,NM_001253901,NM_001253902,NM_002402,NM_177524,NM_177525,NP_001240829,NP_001240830,NP_001240831,NP_002393,NP_803490,NP_803491,XM_011516222,XP_011514524
ENSG00000185904	247.497	5.33494	0.22811	23.3875	5.726e-121	8.02222e-119	84856	1	84856	long intergenic non-protein coding RNA 839	long intergenic non-protein coding RNA 839	NM_032770	NM_032770,NR_026827
ENSG00000171812	239.593	5.32092	0.225528	23.5932	4.5245e-123	6.45487e-121	1296	1	1296	collagen, type VIII, alpha 2	collagen, type VIII, alpha 2	NM_001294347	NM_001294347,NM_005202,NP_001281276,NP_005193,XM_005270477,XP_005270534
ENSG00000229807	135.257	5.31728	0.2426	21.9179	1.75469e-106	2.01247e-104	7503	1	7503	X inactive specific transcript (non-protein coding)	X inactive specific transcript (non-protein coding)	NR_001564	NR_001564
ENSG00000279003	119.981	5.27918	0.246942	21.3782	2.13324e-101	2.2687e-99	NA	0	NA	NA	NA	NA	NA
ENSG00000183072	187.716	5.23988	0.225974	23.1879	6.02646e-119	8.10352e-117	1482	1	1482	NK2 homeobox 5	NK2 homeobox 5	NM_001166175	NM_001166175,NM_001166176,NM_004387,NP_001159647,NP_001159648,NP_004378
ENSG00000168806	351.46	5.22935	0.20886	25.0376	2.38244e-138	4.42397e-136	9836	1	9836	leucine carboxyl methyltransferase 2	leucine carboxyl methyltransferase 2	NM_014793	NM_014793,NP_055608
ENSG00000092051	160.794	5.21909	0.221011	23.6146	2.72801e-123	3.91579e-121	84502	1	84502	junctophilin 4	junctophilin 4	NM_001146028	NM_001146028,NM_032452,NP_001139500,NP_115828
ENSG00000240225	307.386	5.21778	0.216596	24.09	3.18471e-128	4.96751e-126	147947	1	147947	zinc finger protein 542, pseudogene	zinc finger protein 542, pseudogene	NM_194319	NM_194319,NR_003127,NR_024055,NR_024056,NR_024057,NR_033418
ENSG00000120669	217.246	5.21466	0.19549	26.6748	9.23115e-157	2.22661e-154	54937	2	54937100526761	spermatogenesis and oogenesis specific basic helix-loop-helix 2	spermatogenesis and oogenesis specific basic helix-loop-helix 2	NM_001282147	NM_001282147,NM_017826,NP_001269076,NP_060296
ENSG00000168803	281.424	5.19814	0.227171	22.8821	7.00907e-116	9.11062e-114	161823	1	161823	adenosine deaminase-like	adenosine deaminase-like	NM_001012969	NM_001012969,NM_001159280,NP_001012987,NP_001152752,XM_005254204,XM_011521291,XM_011521292,XM_011521293,XM_011521294,XM_011521295,XM_011521296,XM_011521297,XP_005254261,XP_011519593,XP_011519594,XP_011519595,XP_011519596,XP_011519597,XP_011519598,XP_011519599
ENSG00000198865	373.724	5.13432	0.220138	23.3232	2.58141e-120	3.532e-118	100129792	1	100129792	coiled-coil domain containing 152	coiled-coil domain containing 152	NM_001134848	NM_001134848,NP_001128320,XM_011513920,XP_011512222
ENSG00000104691	184.058	5.13395	0.232279	22.1026	2.9854e-108	3.51002e-106	7993	1	7993	UBX domain protein 8	UBX domain protein 8	NM_001282189	NM_001282189,NM_001282199,NM_005671,NP_001269118,NP_001269128,NP_005662,XM_011544655,XP_011542957
ENSG00000161544	241.944	5.11206	0.216055	23.6609	9.11509e-124	1.31646e-121	114757	1	114757	cytoglobin	cytoglobin	NM_134268	NM_134268,NP_599030,XM_005257005,XM_011524272,XP_005257062,XP_011522574
ENSG00000278318	209.75	5.10162	0.228879	22.2897	4.65554e-110	5.67321e-108	7772	1	7772	zinc finger protein 229	zinc finger protein 229	NM_001278510	NM_001278510,NM_014518,NP_001265439,NP_055333,NR_103551,XM_006723372,XM_011527292,XP_006723435,XP_011525594
ENSG00000114405	209.594	5.0043	0.225105	22.2309	1.72577e-109	2.08133e-107	57415	1	57415	chromosome 3 open reading frame 14	chromosome 3 open reading frame 14	NM_001291941	NM_001291941,NM_001291942,NM_001291943,NM_020685,NP_001278870,NP_001278871,NP_001278872,NP_065736,XM_011533966,XP_011532268
ENSG00000159164	467.773	4.97178	0.161894	30.7101	4.17892e-207	1.77771e-204	9900	1	9900	synaptic vesicle glycoprotein 2A	synaptic vesicle glycoprotein 2A	NM_001278719	NM_001278719,NM_014849,NP_001265648,NP_055664
ENSG00000101335	203.573	4.9642	0.228346	21.7398	8.62467e-105	9.65509e-103	10398	1	10398	myosin, light chain 9, regulatory	myosin, light chain 9, regulatory	NM_006097	NM_006097,NM_181526,NP_006088,NP_852667
ENSG00000132164	211.691	4.93556	0.233226	21.1622	2.13185e-99	2.16865e-97	6538	1	6538	solute carrier family 6 (neurotransmitter transporter), member 11	solute carrier family 6 (neurotransmitter transporter), member 11	NM_014229	NM_014229,NP_055044,XM_011534032,XM_011534033,XP_011532334,XP_011532335
ENSG00000166347	291.764	4.92363	0.227331	21.6585	5.05592e-104	5.57988e-102	1528	1	1528	cytochrome b5 type A (microsomal)	cytochrome b5 type A (microsomal)	NM_001190807	NM_001190807,NM_001914,NM_148923,NP_001177736,NP_001905,NP_683725,XM_011525835,XP_011524137
ENSG00000198054	166.738	4.91952	0.236829	20.7725	7.67413e-96	7.29885e-94	84677	1	84677	Down syndrome critical region 8	Down syndrome critical region 8	NM_032589	NM_032589,NM_203428,NM_203429,NR_026838,NR_026839,NR_026840,NR_026841,NR_026842
ENSG00000177932	228.943	4.89916	0.229616	21.3363	5.22892e-101	5.5358e-99	30832	1	30832	zinc finger protein 354C	zinc finger protein 354C	NM_014594	NM_014594,NP_055409,XM_005265894,XP_005265951
ENSG00000106538	180.111	4.85935	0.235592	20.6261	1.59926e-94	1.47896e-92	5919	1	5919	retinoic acid receptor responder (tazarotene induced) 2	retinoic acid receptor responder (tazarotene induced) 2	NM_002889	NM_002889,NP_002880
ENSG00000214897	87.6508	4.84874	0.254918	19.0208	1.14661e-80	8.59846e-79	NA	0	NA	NA	NA	NA	NA
ENSG00000255737	143.79	4.81482	0.240912	19.9858	7.31734e-89	6.15841e-87	100130776	1	100130776	AGAP2 antisense RNA 1	AGAP2 antisense RNA 1	NR_027032	NR_027032
ENSG00000182636	95.8933	4.7856	0.251952	18.9941	1.90804e-80	1.42173e-78	4692	1	4692	necdin, melanoma antigen (MAGE) family member	necdin, melanoma antigen (MAGE) family member	NM_002487	NM_002487,NP_002478
ENSG00000011677	201.733	4.77218	0.234762	20.3277	7.31145e-92	6.40696e-90	2556	1	2556	gamma-aminobutyric acid (GABA) A receptor, alpha 3	gamma-aminobutyric acid (GABA) A receptor, alpha 3	NM_000808	NM_000808,NP_000799,XM_005274659,XM_006724811,XM_011531133,XM_011531134,XP_005274716,XP_006724874,XP_011529435,XP_011529436
ENSG00000184524	121.666	4.77018	0.246203	19.375	1.25541e-83	9.92324e-82	51286	1	51286	cell cycle exit and neuronal differentiation 1	cell cycle exit and neuronal differentiation 1	NM_016564	NM_016564,NP_057648
ENSG00000180178	226.579	4.76625	0.221582	21.5101	1.25126e-102	1.35536e-100	440905	1	440905	fatty acyl CoA reductase 2 pseudogene 1	fatty acyl CoA reductase 2 pseudogene 1	NM_001013711	NM_001013711,NR_026758
ENSG00000184697	114.231	4.7236	0.233816	20.2022	9.36963e-91	8.14949e-89	9074	1	9074	claudin 6	claudin 6	NM_021195	NM_021195,NP_067018
ENSG00000183166	298.135	4.72143	0.228273	20.6832	4.90392e-95	4.58949e-93	83698	1	83698	calneuron 1	calneuron 1	NM_001017440	NM_001017440,NM_031468,NP_001017440,NP_113656,XM_011516593,XM_011516594,XM_011516595,XM_011516596,XM_011516597,XM_011516598,XM_011516599,XP_011514895,XP_011514896,XP_011514897,XP_011514898,XP_011514899,XP_011514900,XP_011514901
ENSG00000224078	133.819	4.6917	0.227958	20.5814	4.02708e-94	3.70951e-92	NA	0	NA	NA	NA	NA	NA
ENSG00000131668	804.605	4.68513	0.135899	34.4751	1.8967e-260	1.23269e-257	56033	1	56033	BARX homeobox 1	BARX homeobox 1	NM_021570	NM_021570,NP_067545
ENSG00000101115	171.304	4.67636	0.228637	20.4532	5.63007e-93	5.06641e-91	57167	1	57167	spalt-like transcription factor 4	spalt-like transcription factor 4	NM_020436	NM_020436,NP_065169,XM_005260467,XM_006723834,XM_011528919,XM_011528920,XM_011528921,XM_011528922,XM_011528923,XP_005260524,XP_006723897,XP_011527221,XP_011527222,XP_011527223,XP_011527224,XP_011527225
ENSG00000205362	116.426	4.6736	0.245384	19.0461	7.07735e-81	5.35886e-79	4489	1	4489	metallothionein 1A	metallothionein 1A	NM_005946	NM_005946,NP_005937
ENSG00000198028	190.596	4.66915	0.233057	20.0344	2.76283e-89	2.3421e-87	147741	1	147741	zinc finger protein 560	zinc finger protein 560	NM_152476	NM_152476,NP_689689,XM_011527696,XM_011527697,XP_011525998,XP_011525999,XR_936157
ENSG00000263711	99.6306	4.65493	0.249241	18.6764	7.70527e-78	5.47964e-76	400655	1	400655	uncharacterized LOC400655	uncharacterized LOC400655	NR_034133	NR_034133
ENSG00000166049	80.2812	4.63963	0.256708	18.0736	5.14742e-73	3.24621e-71	139135	1	139135	PAS domain containing 1	PAS domain containing 1	NM_173493	NM_173493,NP_775764,XM_011531102,XP_011529404
ENSG00000184368	470.477	4.62781	0.212499	21.778	3.75199e-105	4.22045e-103	256714	1	256714	MAP7 domain containing 2	MAP7 domain containing 2	NM_001168465	NM_001168465,NM_001168466,NM_001168467,NM_152780,NP_001161937,NP_001161938,NP_001161939,NP_689993,XM_005274478,XM_005274479,XM_005274480,XM_006724481,XM_006724482,XM_011545483,XM_011545484,XM_011545485,XM_011545486,XP_005274535,XP_005274536,XP_005274537,XP_006724544,XP_006724545,XP_011543785,XP_011543786,XP_011543787,XP_011543788
ENSG00000166394	259.634	4.6211	0.218128	21.1853	1.3063e-99	1.34051e-97	51700	1	51700	cytochrome b5 reductase 2	cytochrome b5 reductase 2	NM_001001336	NM_001001336,NM_001302826,NM_001302827,NM_016229,NP_001289755,NP_001289756,NP_057313,NR_126508,XM_005252975,XM_005252976,XM_006718251,XM_006718252,XM_011520184,XM_011520185,XP_005253032,XP_005253033,XP_006718314,XP_006718315,XP_011518486,XP_011518487
ENSG00000048545	130.39	4.61965	0.237336	19.4646	2.19409e-84	1.75805e-82	2978	1	2978	guanylate cyclase activator 1A (retina)	guanylate cyclase activator 1A (retina)	NM_000409	NM_000409,NP_000400,XM_006715073,XM_011514536,XM_011514537,XM_011514538,XM_011514539,XP_006715136,XP_011512838,XP_011512839,XP_011512840,XP_011512841
ENSG00000165584	58.1922	4.61792	0.272491	16.9471	2.02225e-64	1.04447e-62	10214	1	10214	synovial sarcoma, X breakpoint 3	synovial sarcoma, X breakpoint 3	NM_021014	NM_021014,NM_175711,NP_066294,XM_011543885,XP_011542187
ENSG00000198185	182.455	4.6168	0.228578	20.1979	1.02079e-90	8.84571e-89	55713	1	55713	zinc finger protein 334	zinc finger protein 334	NM_001270497	NM_001270497,NM_018102,NM_199441,NP_001257426,NP_060572,NR_073026,XM_006723817,XM_006723820,XM_011528889,XM_011528890,XM_011528891,XM_011528892,XM_011528893,XM_011528894,XM_011528895,XM_011528896,XM_011528897,XM_011528898,XM_011528899,XP_006723880,XP_006723883,XP_011527191,XP_011527192,XP_011527193,XP_011527194,XP_011527195,XP_011527196,XP_011527197,XP_011527198,XP_011527199,XP_011527200,XP_01152…
ENSG00000278811	367.631	4.60796	0.18323	25.1485	1.46812e-139	2.74797e-137	100289211	1	100289211	long intergenic non-protein coding RNA 624	long intergenic non-protein coding RNA 624	NR_038423	NR_038423
ENSG00000067445	197.793	4.60383	0.213877	21.5256	8.97115e-103	9.7627e-101	7216	1	7216	trophinin	trophinin	NM_001039705	NM_001039705,NM_001271183,NM_001271184,NM_016157,NM_177556,NM_177557,NP_001034794,NP_001258112,NP_001258113,NP_057241,NP_808224,NP_808225,NR_073148,NR_073149,XM_006724600,XM_006724605,XM_011530808,XM_011530809,XM_011530810,XM_011530811,XM_011530812,XM_011530813,XM_011530814,XM_011530815,XP_006724663,XP_006724668,XP_011529110,XP_011529111,XP_011529112,XP_011529113,XP_011529114,XP_011529115,XP_0115…
ENSG00000131914	693.062	4.59478	0.110705	41.5048	0	0	79727	1	79727	lin-28 homolog A (C. elegans)	lin-28 homolog A (C. elegans)	NM_024674	NM_024674,NP_078950,XM_011542148,XP_011540450
ENSG00000169594	277.189	4.57262	0.192554	23.7472	1.17401e-124	1.71677e-122	646	1	646	basonuclin 1	basonuclin 1	NM_001301206	NM_001301206,NM_001717,NP_001288135,NP_001708,XM_011521893,XM_011521894,XP_011520195,XP_011520196
ENSG00000154553	188.176	4.57059	0.227833	20.0611	1.61454e-89	1.37365e-87	27295	1	27295	PDZ and LIM domain 3	PDZ and LIM domain 3	NM_001114107	NM_001114107,NM_001257962,NM_001257963,NM_014476,NP_001107579,NP_001244891,NP_001244892,NP_055291,NR_047562,XM_011531874,XP_011530176,XR_938723,XR_938724
ENSG00000102287	213.824	4.55822	0.23409	19.4721	1.89413e-84	1.52817e-82	2564	1	2564	gamma-aminobutyric acid (GABA) A receptor, epsilon	gamma-aminobutyric acid (GABA) A receptor, epsilon	NM_004961	NM_004961,NM_021984,NM_021987,NM_021990,NP_004952,XM_006724813,XM_011531135,XM_011531136,XM_011531137,XM_011531138,XM_011531139,XM_011531140,XP_006724876,XP_011529437,XP_011529438,XP_011529439,XP_011529440,XP_011529441,XP_011529442
ENSG00000125144	108.858	4.55408	0.2456	18.5426	9.3531e-77	6.43631e-75	4495	1	4495	metallothionein 1G	metallothionein 1G	NM_001301267	NM_001301267,NM_005950,NP_001288196,NP_005941
ENSG00000100842	169.09	4.55243	0.222459	20.4641	4.49745e-93	4.07856e-91	10278	1	10278	embryonal Fyn-associated substrate	embryonal Fyn-associated substrate	NM_001277174	NM_001277174,NM_005864,NM_032459,NP_001264103,NP_005855,NP_115835,XM_005267256,XP_005267313
ENSG00000196653	154.337	4.5469	0.239623	18.9752	2.73321e-80	2.03012e-78	91392	1	91392	zinc finger protein 502	zinc finger protein 502	NM_001134440	NM_001134440,NM_001134441,NM_001134442,NM_001282880,NM_033210,NP_001127912,NP_001127913,NP_001127914,NP_001269809,NP_149987,XM_011534213,XM_011548748,XP_011532515,XP_011547050
ENSG00000128710	209.002	4.54298	0.222004	20.4635	4.55571e-93	4.11544e-91	3236	1	3236	homeobox D10	homeobox D10	NM_002148	NM_002148,NP_002139
ENSG00000184735	144.511	4.53703	0.240839	18.8385	3.65463e-79	2.64729e-77	168400	1	168400	DEAD (Asp-Glu-Ala-Asp) box polypeptide 53	DEAD (Asp-Glu-Ala-Asp) box polypeptide 53	NM_182699	NM_182699,NP_874358
ENSG00000169059	173.237	4.53524	0.239645	18.9249	7.11617e-80	5.21934e-78	26609	2	2660951481	variable charge, X-linked	variable charge, X-linked	NM_013452	NM_013452,NP_038480,XM_011545490,XP_011543792
ENSG00000253250	170.24	4.5337	0.237442	19.0939	2.83693e-81	2.16914e-79	100127983	1	100127983	chromosome 8 open reading frame 88	chromosome 8 open reading frame 88	NM_001190972	NM_001190972,NP_001177901
ENSG00000175414	449.005	4.5288	0.179677	25.2053	3.50841e-140	6.72839e-138	285598	1	285598	ADP-ribosylation factor-like 10	ADP-ribosylation factor-like 10	NM_173664	NM_173664,NP_775935,XM_005265890,XM_005265891,XM_011534529,XM_011534530,XM_011534531,XP_005265947,XP_005265948,XP_011532831,XP_011532832,XP_011532833
ENSG00000167874	123.944	4.50964	0.226933	19.8722	7.08904e-88	5.92366e-86	92162	1	92162	transmembrane protein 88	transmembrane protein 88	NM_203411	NM_203411,NP_981956,XM_005256856,XM_005256857,XP_005256913,XP_005256914
ENSG00000136574	384.867	4.50861	0.161178	27.9728	3.4814e-172	1.00561e-169	2626	1	2626	GATA binding protein 4	GATA binding protein 4	NM_001308093	NM_001308093,NM_001308094,NM_002052,NP_001295022,NP_001295023,NP_002043,XM_005272384,XM_005272385,XM_005272386,XM_006716248,XM_006716249,XM_011543817,XM_011543818,XP_005272441,XP_005272442,XP_005272443,XP_006716311,XP_006716312,XP_011542119,XP_011542120
ENSG00000088543	179.939	4.50847	0.216708	20.8043	3.95533e-96	3.79274e-94	51161	1	51161	chromosome 3 open reading frame 18	chromosome 3 open reading frame 18	NM_001171740	NM_001171740,NM_001171741,NM_001171743,NM_016210,NP_001165211,NP_001165212,NP_001165214,NP_057294,XM_011533781,XM_011533782,XM_011533783,XM_011533784,XM_011533785,XM_011533786,XM_011533787,XM_011533788,XM_011533789,XM_011533790,XP_011532083,XP_011532084,XP_011532085,XP_011532086,XP_011532087,XP_011532088,XP_011532089,XP_011532090,XP_011532091,XP_011532092
ENSG00000240563	177.341	4.50691	0.184331	24.45	5.02848e-132	8.46412e-130	54596	1	54596	LINE-1 type transposase domain containing 1	LINE-1 type transposase domain containing 1	NM_001164835	NM_001164835,NM_019079,NP_001158307,NP_061952
ENSG00000250742	88.1755	4.48622	0.251569	17.8329	3.92275e-71	2.36548e-69	400043	1	400043	uncharacterized LOC400043	uncharacterized LOC400043	NR_026656	NR_026656
ENSG00000160284	92.9389	4.47583	0.248533	18.009	1.65641e-72	1.03072e-70	84221	1	84221	spermatogenesis and centriole associated 1-like	spermatogenesis and centriole associated 1-like	NM_001142854	NM_001142854,NM_032261,NP_001136326,NP_115637,XM_005261188,XM_006725399,XM_011529756,XM_011546891,XP_005261245,XP_006725462,XP_011528058,XP_011545193
ENSG00000186603	51.8632	4.46454	0.272294	16.396	2.04165e-60	9.65019e-59	84842	1	84842	4-hydroxyphenylpyruvate dioxygenase-like	4-hydroxyphenylpyruvate dioxygenase-like	NM_032756	NM_032756,NP_116145
ENSG00000056291	160.054	4.46396	0.239118	18.6685	8.93868e-78	6.31838e-76	10886	1	10886	neuropeptide FF receptor 2	neuropeptide FF receptor 2	NM_001144756	NM_001144756,NM_004885,NM_053036,NP_001138228,NP_004876,NP_444264,XM_011531554,XP_011529856
ENSG00000169551	77.7333	4.44959	0.253229	17.5714	4.07656e-69	2.33201e-67	54967	1	54967	cancer/testis antigen 55	cancer/testis antigen 55	NM_001031705	NM_001031705,NM_017863,NP_001026875,NP_060333,XM_005262427,XP_005262484
ENSG00000106633	107.697	4.42025	0.243884	18.1243	2.04749e-73	1.31247e-71	2645	1	2645	glucokinase (hexokinase 4)	glucokinase (hexokinase 4)	NM_000162	NM_000162,NM_033507,NM_033508,NP_000153,NP_277042,NP_277043
ENSG00000073803	283.431	4.41994	0.184162	24.0003	2.76097e-127	4.2499e-125	9175	1	9175	mitogen-activated protein kinase kinase kinase 13	mitogen-activated protein kinase kinase kinase 13	NM_001242314	NM_001242314,NM_001242317,NM_004721,NP_001229243,NP_001229246,NP_004712,NR_038322,XM_011513310,XP_011511612
ENSG00000221923	190.907	4.41462	0.227887	19.372	1.33002e-83	1.04776e-81	400713	1	400713	zinc finger protein 880	zinc finger protein 880	NM_001145434	NM_001145434,NP_001138906
ENSG00000264334	116.843	4.40709	0.246251	17.8967	1.25031e-71	7.61809e-70	NA	0	NA	NA	NA	NA	NA
ENSG00000130540	90.5411	4.39768	0.251405	17.4924	1.63662e-68	9.22697e-67	25830	1	25830	sulfotransferase family 4A, member 1	sulfotransferase family 4A, member 1	NM_014351	NM_014351,NM_176874,NP_055166,XM_011530120,XM_011530121,XP_011528422,XP_011528423,XR_937838,XR_937839
ENSG00000206549	78.2776	4.37963	0.258644	16.9331	2.56563e-64	1.3193e-62	29122	1	29122	protease, serine, 50	protease, serine, 50	NM_013270	NM_013270,NP_037402
ENSG00000107562	132.999	4.36813	0.242185	18.0363	1.01029e-72	6.32024e-71	6387	1	6387	chemokine (C-X-C motif) ligand 12	chemokine (C-X-C motif) ligand 12	NM_000609	NM_000609,NM_001033886,NM_001178134,NM_001277990,NM_199168,NP_000600,NP_001029058,NP_001171605,NP_001264919,NP_954637
ENSG00000268089	369.593	4.36454	0.168511	25.9006	6.55579e-148	1.40721e-145	55879	1	55879	gamma-aminobutyric acid (GABA) A receptor, theta	gamma-aminobutyric acid (GABA) A receptor, theta	NM_018558	NM_018558,NP_061028,XM_011531184,XP_011529486
ENSG00000143768	45.0889	4.35098	0.2847	15.2827	9.97077e-53	3.9878e-51	7044	1	7044	left-right determination factor 2	left-right determination factor 2	NM_001172425	NM_001172425,NM_003240,NP_001165896,NP_003231,XM_011544266,XP_011542568
ENSG00000159182	51.4574	4.34439	0.271932	15.976	1.87776e-57	8.3366e-56	84366	1	84366	prostate cancer susceptibility candidate 1	prostate cancer susceptibility candidate 1	NM_032391	NM_032391,NP_115767
ENSG00000182632	123.105	4.33675	0.245746	17.6472	1.0685e-69	6.23433e-68	NA	0	NA	NA	NA	NA	NA
ENSG00000134871	87.2633	4.33518	0.250561	17.3019	4.55246e-67	2.48864e-65	1284	1	1284	collagen, type IV, alpha 2	collagen, type IV, alpha 2	NM_001846	NM_001846,NP_001837
ENSG00000164867	172.078	4.3075	0.204911	21.0213	4.18703e-98	4.15101e-96	4846	1	4846	nitric oxide synthase 3 (endothelial cell)	nitric oxide synthase 3 (endothelial cell)	NM_000603	NM_000603,NM_001160109,NM_001160110,NM_001160111,NP_000594,NP_001153581,NP_001153582,NP_001153583,XM_006716002,XP_006716065
ENSG00000229637	84.9951	4.30659	0.254931	16.8932	5.0522e-64	2.58092e-62	360205	1	360205	prostate cancer susceptibility candidate 2	prostate cancer susceptibility candidate 2	NM_001282275	NM_001282275,NM_001282276,NP_001269204,NP_001269205,XM_006721865,XM_011524747,XM_011524748,XP_006721928,XP_011523049,XP_011523050
ENSG00000074410	137.783	4.30441	0.239212	17.9941	2.16721e-72	1.34499e-70	771	1	771	carbonic anhydrase XII	carbonic anhydrase XII	NM_001218	NM_001218,NM_001293642,NM_206925,NP_001209,NP_001280571,NP_996808
ENSG00000204832	35.6873	4.27794	0.290836	14.7091	5.63445e-49	2.07933e-47	100128098	1	100128098	ST8SIA6 antisense RNA 1	ST8SIA6 antisense RNA 1	NR_034129	NR_034129
ENSG00000146122	149.773	4.27234	0.238783	17.8921	1.35819e-71	8.25389e-70	23500	1	23500	dishevelled associated activator of morphogenesis 2	dishevelled associated activator of morphogenesis 2	NM_001201427	NM_001201427,NM_015345,NP_001188356,NP_056160,XM_006715039,XM_006715040,XM_006715042,XM_006715043,XM_006715044,XM_006715045,XM_006715046,XM_011514447,XP_006715102,XP_006715103,XP_006715105,XP_006715106,XP_006715107,XP_006715108,XP_006715109,XP_011512749
ENSG00000013016	180.228	4.26989	0.201297	21.2119	7.41343e-100	7.74339e-98	30845	1	30845	EH-domain containing 3	EH-domain containing 3	NM_014600	NM_014600,NP_055415,XM_011532806,XP_011531108
ENSG00000175793	345.285	4.26954	0.162807	26.2246	1.39333e-151	3.16502e-149	2810	1	2810	stratifin	stratifin	NM_006142	NM_006142,NP_006133
ENSG00000226057	148.26	4.26864	0.243576	17.5249	9.25807e-69	5.25755e-67	NA	0	NA	NA	NA	NA	NA
ENSG00000165496	128.324	4.25122	0.242952	17.4982	1.47995e-68	8.3841e-67	140801	1	140801	ribosomal protein L10-like	ribosomal protein L10-like	NM_080746	NM_080746,NP_542784
ENSG00000078549	84.4553	4.23877	0.248931	17.0279	5.10406e-65	2.67757e-63	117	1	117	adenylate cyclase activating polypeptide 1 (pituitary) receptor type I	adenylate cyclase activating polypeptide 1 (pituitary) receptor type I	NM_001118	NM_001118,NM_001199635,NM_001199636,NM_001199637,NP_001109,NP_001186564,NP_001186565,NP_001186566,XM_005249618,XM_006715645,XM_011515117,XM_011515118,XM_011515119,XM_011515120,XP_005249675,XP_006715708,XP_011513419,XP_011513420,XP_011513421,XP_011513422
ENSG00000260027	377.076	4.23335	0.16528	25.6132	1.08877e-144	2.23455e-142	3217	1	3217	homeobox B7	homeobox B7	NM_004502	NM_004502,NP_004493
ENSG00000179455	115.493	4.22764	0.23682	17.8517	2.80386e-71	1.69514e-69	7681	1	7681	makorin ring finger protein 3	makorin ring finger protein 3	NM_005664	NM_005664,NP_005655
ENSG00000196593	81.154	4.2208	0.23527	17.9402	5.72005e-72	3.5219e-70	NA	0	NA	NA	NA	NA	NA
ENSG00000157349	51.7368	4.21485	0.266797	15.798	3.21353e-56	1.40274e-54	11269	1	11269	DEAD (Asp-Glu-Ala-Asp) box polypeptide 19B	DEAD (Asp-Glu-Ala-Asp) box polypeptide 19B	NM_001014449	NM_001014449,NM_001014451,NM_001257172,NM_001257173,NM_001257174,NM_001257175,NM_007242,NP_001014449,NP_001014451,NP_001244101,NP_001244102,NP_001244103,NP_001244104,NP_009173,XM_006721127,XM_011522832,XM_011522833,XM_011522834,XP_006721190,XP_011521134,XP_011521135,XP_011521136
ENSG00000183837	135.082	4.1963	0.244297	17.1771	3.9425e-66	2.11566e-64	29944	1	29944	paraneoplastic Ma antigen 3	paraneoplastic Ma antigen 3	NM_001282535	NM_001282535,NM_013364,NP_001269464,NP_037496,XR_938508
ENSG00000180964	570.124	4.18628	0.133102	31.4516	3.99001e-217	1.86709e-214	90843	1	90843	transcription elongation factor A (SII)-like 8	transcription elongation factor A (SII)-like 8	NM_001006684	NM_001006684,NM_153333,NP_001006685,NP_699164
ENSG00000197928	106.452	4.17606	0.249048	16.7681	4.17779e-63	2.0931e-61	342926	1	342926	zinc finger protein 677	zinc finger protein 677	NM_182609	NM_182609,NP_872415,XM_005258860,XM_005258862,XM_011526912,XM_011526913,XM_011526914,XP_005258917,XP_005258919,XP_011525214,XP_011525215,XP_011525216
ENSG00000228623	82.8149	4.17527	0.254422	16.4108	1.6008e-60	7.59715e-59	NA	0	NA	NA	NA	NA	NA
ENSG00000164616	95.5655	4.17191	0.250989	16.6218	4.84199e-62	2.38e-60	NA	0	NA	NA	NA	NA	NA
ENSG00000128709	316.494	4.14607	0.16974	24.426	9.05467e-132	1.49192e-129	3235	1	3235	homeobox D9	homeobox D9	NM_014213	NM_014213,NP_055028
ENSG00000197702	139.861	4.13043	0.242193	17.0543	3.24923e-65	1.71221e-63	55742	1	55742	parvin, alpha	parvin, alpha	NM_018222	NM_018222,NP_060692,XM_005253015,XP_005253072
ENSG00000242498	34.9054	4.10871	0.289541	14.1904	1.05051e-45	3.48634e-44	348110	1	348110	actin-related protein 2/3 complex inhibitor	actin-related protein 2/3 complex inhibitor	NM_001282380	NM_001282380,NM_182616,NP_001269309,NP_872422
ENSG00000224559	98.4483	4.09111	0.251825	16.2458	2.39057e-59	1.10757e-57	101927994	1	101927994	long intergenic non-protein coding RNA 1087	long intergenic non-protein coding RNA 1087	NR_108087	NR_108087
ENSG00000269821	205.027	4.08171	0.237614	17.1779	3.88834e-66	2.09139e-64	10984	1	10984	KCNQ1 opposite strand/antisense transcript 1 (non-protein coding)	KCNQ1 opposite strand/antisense transcript 1 (non-protein coding)	NR_002728	NR_002728
ENSG00000155980	194.644	4.05785	0.193121	21.0119	5.10076e-98	5.03555e-96	3798	1	3798	kinesin family member 5A	kinesin family member 5A	NM_004984	NM_004984,NP_004975
ENSG00000205628	142.588	4.05621	0.243955	16.6269	4.45128e-62	2.19256e-60	401337	1	401337	long intergenic non-protein coding RNA 1446	long intergenic non-protein coding RNA 1446	NM_001001707	NM_001001707,NR_038371
ENSG00000182240	90.1561	4.05357	0.253288	16.0038	1.20199e-57	5.36696e-56	25825	1	25825	beta-site APP-cleaving enzyme 2	beta-site APP-cleaving enzyme 2	NM_012105	NM_012105,NM_138991,NM_138992,NP_036237,NP_620476,NP_620477
ENSG00000135549	523.101	4.0529	0.145208	27.9109	1.96505e-171	5.60686e-169	5570	1	5570	protein kinase (cAMP-dependent, catalytic) inhibitor beta	protein kinase (cAMP-dependent, catalytic) inhibitor beta	NM_001270393	NM_001270393,NM_001270394,NM_001270395,NM_032471,NM_181794,NM_181795,NP_001257322,NP_001257323,NP_001257324,NP_115860,NP_861459,NP_861460,XM_011535930,XM_011535931,XM_011535932,XM_011535933,XM_011535934,XM_011535935,XM_011535936,XM_011535937,XP_011534232,XP_011534233,XP_011534234,XP_011534235,XP_011534236,XP_011534237,XP_011534238,XP_011534239
ENSG00000158296	88.8983	4.04732	0.25058	16.1518	1.1023e-58	5.01761e-57	64849	1	64849	solute carrier family 13 (sodium-dependent dicarboxylate transporter), member 3	solute carrier family 13 (sodium-dependent dicarboxylate transporter), member 3	NM_001011554	NM_001011554,NM_001193339,NM_001193340,NM_001193342,NM_022829,NP_001011554,NP_001180268,NP_001180269,NP_001180271,NP_073740
ENSG00000184302	36.5486	4.04346	0.28486	14.1945	9.90418e-46	3.29172e-44	4990	1	4990	SIX homeobox 6	SIX homeobox 6	NM_007374	NM_007374,NP_031400
ENSG00000272763	127.932	4.03963	0.232131	17.4024	7.91591e-68	4.37845e-66	NA	0	NA	NA	NA	NA	NA
ENSG00000237298	148.961	4.03285	0.229609	17.5639	4.65297e-69	2.65526e-67	100506866	2	1.00507e+17	TTN antisense RNA 1	TTN antisense RNA 1	NR_038271	NR_038271,NR_038272
ENSG00000083290	101.3	4.01141	0.247539	16.2052	4.63665e-59	2.13131e-57	9706	1	9706	unc-51 like autophagy activating kinase 2	unc-51 like autophagy activating kinase 2	NM_001142610	NM_001142610,NM_014683,NP_001136082,NP_055498,XM_011524087,XP_011522389,XR_934124,XR_934125
ENSG00000143469	108.654	4.01051	0.246076	16.2978	1.02262e-59	4.76617e-58	255928	1	255928	synaptotagmin XIV	synaptotagmin XIV	NM_001146261	NM_001146261,NM_001146262,NM_001146264,NM_001256006,NM_153262,NP_001139733,NP_001139734,NP_001139736,NP_001242935,NP_694994,NR_027459,XM_006711262,XM_011509388,XM_011509389,XM_011509390,XP_006711325,XP_011507690,XP_011507691,XP_011507692
ENSG00000116774	410.956	3.99356	0.126451	31.5819	6.54559e-219	3.12545e-216	56944	1	56944	olfactomedin-like 3	olfactomedin-like 3	NM_001286352	NM_001286352,NM_001286353,NM_020190,NP_001273281,NP_001273282,NP_064575
ENSG00000120451	836.022	3.97984	0.10751	37.0182	5.82947e-300	5.68301e-297	399979	1	399979	sorting nexin 19	sorting nexin 19	NM_001301089	NM_001301089,NM_014758,NP_001288018,NP_055573,XM_005271546,XM_011542819,XM_011542820,XM_011542821,XM_011542822,XM_011542823,XM_011542824,XM_011542825,XM_011542826,XM_011542827,XP_005271603,XP_011541121,XP_011541122,XP_011541123,XP_011541124,XP_011541125,XP_011541126,XP_011541127,XP_011541128,XP_011541129,XR_428976,XR_428977
ENSG00000163520	96.4654	3.97536	0.246352	16.1369	1.40388e-58	6.35329e-57	2199	1	2199	fibulin 2	fibulin 2	NM_001004019	NM_001004019,NM_001165035,NM_001998,NP_001004019,NP_001158507,NP_001989,XM_006713026,XP_006713089
ENSG00000104870	161.725	3.97459	0.206382	19.2584	1.20114e-82	9.36771e-81	2217	1	2217	Fc fragment of IgG, receptor, transporter, alpha	Fc fragment of IgG, receptor, transporter, alpha	NM_001136019	NM_001136019,NM_004107,NP_001129491,NP_004098,XM_005258657,XM_011526627,XM_011526628,XP_005258714,XP_011524929,XP_011524930,XR_935765
ENSG00000181433	54.0102	3.96399	0.267941	14.7943	1.59516e-49	6.00033e-48	55511	1	55511	sarcoma antigen 1	sarcoma antigen 1	NM_018666	NM_018666,NP_061136,XM_011531355,XM_011531356,XM_011531357,XM_011531358,XM_011531359,XM_011531360,XM_011531361,XP_011529657,XP_011529658,XP_011529659,XP_011529660,XP_011529661,XP_011529662,XP_011529663
ENSG00000168952	75.8224	3.95642	0.253655	15.5976	7.5544e-55	3.17135e-53	29091	1	29091	syntaxin binding protein 6 (amisyn)	syntaxin binding protein 6 (amisyn)	NM_001304476	NM_001304476,NM_001304477,NM_014178,NP_001291405,NP_001291406,NP_054897,XM_006720121,XM_011536668,XM_011536669,XP_006720184,XP_011534970,XP_011534971
ENSG00000169981	180.677	3.95127	0.199233	19.8324	1.56384e-87	1.29749e-85	7584	1	7584	zinc finger protein 35	zinc finger protein 35	NM_003420	NM_003420,NP_003411
ENSG00000259848	175.228	3.94701	0.237677	16.6067	6.23692e-62	3.04011e-60	442028	1	442028	uncharacterized LOC442028	uncharacterized LOC442028	NR_037597	NR_037597
ENSG00000206172	322.549	3.93747	0.168715	23.3379	1.82799e-120	2.51585e-118	3039	1	3039	hemoglobin, alpha 1	hemoglobin, alpha 1	NM_000558	NM_000558,NP_000549
ENSG00000198715	75.0502	3.93231	0.252205	15.5917	8.28838e-55	3.46911e-53	112770	1	112770	glycosylated lysosomal membrane protein	glycosylated lysosomal membrane protein	NM_001256604	NM_001256604,NM_001256605,NM_001256608,NM_001256609,NM_144580,NP_001243533,NP_001243534,NP_001243537,NP_001243538,NP_653181,XM_011509117,XP_011507419,XR_426762
ENSG00000137841	100.648	3.92946	0.240417	16.3443	4.77254e-60	2.23326e-58	5330	1	5330	phospholipase C, beta 2	phospholipase C, beta 2	NM_001284297	NM_001284297,NM_001284298,NM_001284299,NM_004573,NP_001271226,NP_001271227,NP_001271228,NP_004564,XM_005254448,XM_005254449,XM_005254450,XM_011521674,XM_011521675,XM_011521676,XM_011521677,XM_011521678,XP_005254505,XP_005254506,XP_005254507,XP_011519976,XP_011519977,XP_011519978,XP_011519979,XP_011519980,XR_931845
ENSG00000080007	114.041	3.92369	0.248931	15.7622	5.66417e-56	2.45416e-54	55510	1	55510	DEAD (Asp-Glu-Ala-Asp) box polypeptide 43	DEAD (Asp-Glu-Ala-Asp) box polypeptide 43	NM_018665	NM_018665,NP_061135,XM_011535926,XM_011535927,XM_011535928,XM_011535929,XP_011534228,XP_011534229,XP_011534230,XP_011534231
ENSG00000164318	78.5716	3.91634	0.237374	16.4986	3.75312e-61	1.80683e-59	133584	1	133584	EGF-like, fibronectin type III and laminin G domains	EGF-like, fibronectin type III and laminin G domains	NM_001205301	NM_001205301,NM_152403,NM_182798,NM_182799,NM_182801,NP_001192230,NP_689616,NP_877950,NP_877953
ENSG00000115297	57.412	3.91389	0.264202	14.814	1.18905e-49	4.47989e-48	3196	1	3196	T-cell leukemia homeobox 2	T-cell leukemia homeobox 2	NM_016170	NM_016170,NP_057254
ENSG00000185404	89.7773	3.89168	0.253985	15.3225	5.40778e-53	2.17398e-51	93349	1	93349	SP140 nuclear body protein-like	SP140 nuclear body protein-like	NM_001308162	NM_001308162,NM_001308163,NM_138402,NP_001295091,NP_001295092,NP_612411,XM_006712854,XM_006712855,XM_006712856,XM_006712857,XM_006712858,XM_006712859,XM_011512185,XM_011512186,XM_011512187,XM_011512188,XM_011512189,XM_011512190,XM_011512191,XP_006712917,XP_006712918,XP_006712919,XP_006712920,XP_006712921,XP_006712922,XP_011510487,XP_011510488,XP_011510489,XP_011510490,XP_011510491,XP_011510492,XP…
ENSG00000169418	101.827	3.87096	0.247404	15.6463	3.52121e-55	1.48711e-53	4881	1	4881	natriuretic peptide receptor 1	natriuretic peptide receptor 1	NM_000906	NM_000906,NP_000897,XM_005245218,XM_006711342,XM_006711343,XM_011509585,XP_005245275,XP_006711405,XP_006711406,XP_011507887
ENSG00000182985	781.506	3.86329	0.105988	36.4502	6.82656e-291	5.32403e-288	23705	1	23705	cell adhesion molecule 1	cell adhesion molecule 1	NM_001098517	NM_001098517,NM_001301043,NM_001301044,NM_001301045,NM_014333,NP_001091987,NP_001287972,NP_001287973,NP_001287974,NP_055148,XM_005271494,XP_005271551
ENSG00000228709	63.7256	3.84839	0.264023	14.576	3.99215e-48	1.42385e-46	NA	0	NA	NA	NA	NA	NA
ENSG00000156466	117.719	3.84441	0.212402	18.0996	3.2081e-73	2.03967e-71	392255	1	392255	growth differentiation factor 6	growth differentiation factor 6	NM_001001557	NM_001001557,NP_001001557,XM_011517030,XP_011515332
ENSG00000183421	101.81	3.84425	0.230463	16.6806	1.81532e-62	9.03684e-61	54101	1	54101	receptor-interacting serine-threonine kinase 4	receptor-interacting serine-threonine kinase 4	NM_020639	NM_020639,NP_065690
ENSG00000115380	76.4936	3.83913	0.251306	15.2767	1.09308e-52	4.35685e-51	2202	1	2202	EGF containing fibulin-like extracellular matrix protein 1	EGF containing fibulin-like extracellular matrix protein 1	NM_001039348	NM_001039348,NM_001039349,NM_004105,NP_001034437,NP_001034438,XM_005264205,XP_005264262
ENSG00000134873	237.472	3.83315	0.232754	16.4687	6.16066e-61	2.94165e-59	9071	1	9071	claudin 10	claudin 10	NM_001160100	NM_001160100,NM_006984,NM_182848,NP_001153572,NP_008915,NP_878268,XM_011521134,XP_011519436
ENSG00000166501	86.4694	3.82356	0.248185	15.4061	1.48962e-53	6.11451e-52	5579	1	5579	protein kinase C, beta	protein kinase C, beta	NM_002738	NM_002738,NM_212535,NP_002729,NP_997700
ENSG00000166770	153.019	3.8098	0.204365	18.6422	1.46205e-77	1.02112e-75	100128252	1	100128252	ZNF667 antisense RNA 1 (head to head)	ZNF667 antisense RNA 1 (head to head)	NM_198879	NM_198879,NR_036521,NR_036522
ENSG00000162444	38.3476	3.80959	0.278396	13.6841	1.26435e-42	3.92856e-41	116362	1	116362	retinol binding protein 7, cellular	retinol binding protein 7, cellular	NM_052960	NM_052960,NP_443192
ENSG00000188536	96.5751	3.80755	0.248777	15.3051	7.0728e-53	2.83846e-51	3040	1	3040	hemoglobin, alpha 2	hemoglobin, alpha 2	NM_000517	NM_000517,NP_000508
ENSG00000168754	194.083	3.79742	0.239323	15.8674	1.06634e-56	4.68089e-55	51252	1	51252	family with sequence similarity 178, member B	family with sequence similarity 178, member B	NM_001122646	NM_001122646,NM_001172667,NM_016490,NP_001116118,NP_001166138,NP_057574,XM_011511293,XM_011511294,XM_011511295,XM_011511296,XM_011511297,XM_011511298,XM_011511299,XP_011509595,XP_011509596,XP_011509597,XP_011509598,XP_011509599,XP_011509600,XP_011509601,XR_427090
ENSG00000131771	66.5191	3.78735	0.260801	14.522	8.7923e-48	3.10745e-46	84152	1	84152	protein phosphatase 1, regulatory (inhibitor) subunit 1B	protein phosphatase 1, regulatory (inhibitor) subunit 1B	NM_001242464	NM_001242464,NM_032192,NM_181505,NP_001229393,NP_115568,NP_852606,XM_006722137,XP_006722200
ENSG00000120915	108.113	3.78259	0.232218	16.2889	1.1832e-59	5.4927e-58	2053	1	2053	epoxide hydrolase 2, cytoplasmic	epoxide hydrolase 2, cytoplasmic	NM_001256482	NM_001256482,NM_001256483,NM_001256484,NM_001979,NP_001243411,NP_001243412,NP_001243413,NP_001970
ENSG00000165118	30.8264	3.77993	0.290415	13.0156	9.97212e-39	2.80767e-37	84267	1	84267	chromosome 9 open reading frame 64	chromosome 9 open reading frame 64	NM_032307	NM_032307,NP_115683,XM_005252271,XM_011519092,XP_005252328,XP_011517394
ENSG00000186446	73.8229	3.75668	0.259263	14.4899	1.40417e-47	4.94036e-46	115560	1	115560	zinc finger protein 501	zinc finger protein 501	NM_001258280	NM_001258280,NM_145044,NP_001245209,NP_659481
ENSG00000185869	142.079	3.75301	0.238816	15.7151	1.19196e-55	5.10773e-54	374899	1	374899	zinc finger protein 829	zinc finger protein 829	NM_001037232	NM_001037232,NM_001171979,NP_001032309,NP_001165450,XM_005258876,XM_011526933,XP_005258933,XP_011525235
ENSG00000156269	186.409	3.75249	0.240406	15.609	6.32403e-55	2.66601e-53	84779	1	84779	N(alpha)-acetyltransferase 11, NatA catalytic subunit	N(alpha)-acetyltransferase 11, NatA catalytic subunit	NM_032693	NM_032693,NP_116082
ENSG00000166821	62.5577	3.74923	0.263002	14.2556	4.13999e-46	1.39774e-44	8800	1	8800	peroxisomal biogenesis factor 11 alpha	peroxisomal biogenesis factor 11 alpha	NM_001271572	NM_001271572,NM_001271573,NM_003847,NP_001258501,NP_001258502,NP_003838
ENSG00000167555	85.1992	3.74272	0.25239	14.8291	9.50245e-50	3.59755e-48	84436	1	84436	zinc finger protein 528	zinc finger protein 528	NM_032423	NM_032423,NP_115799,XM_005259323,XM_006723418,XM_011527392,XM_011527393,XM_011527394,XP_005259380,XP_006723481,XP_011525694,XP_011525695,XP_011525696
ENSG00000155495	31.2092	3.74125	0.28865	12.9612	2.03008e-38	5.64778e-37	9947	1	9947	melanoma antigen family C1	melanoma antigen family C1	NM_005462	NM_005462,NP_005453,XM_011531418,XP_011529720
ENSG00000127399	23.0441	3.73447	0.300898	12.4111	2.27529e-35	5.84998e-34	65999	1	65999	leucine rich repeat containing 61	leucine rich repeat containing 61	NM_001142928	NM_001142928,NM_023942,NP_001136400,NP_076431,XM_006716095,XM_011516520,XP_006716158,XP_011514822
ENSG00000258484	293.671	3.72932	0.223873	16.6582	2.63863e-62	1.3052e-60	246777	1	246777	sperm equatorial segment protein 1	sperm equatorial segment protein 1	NM_145658	NM_145658,NP_663633
ENSG00000170370	71.0602	3.7241	0.248079	15.0117	6.15199e-51	2.37914e-49	2018	1	2018	empty spiracles homeobox 2	empty spiracles homeobox 2	NM_001165924	NM_001165924,NM_004098,NP_001159396,NP_004089
ENSG00000126803	36.3032	3.71962	0.278553	13.3534	1.13177e-40	3.37324e-39	3306	1	3306	heat shock 70kDa protein 2	heat shock 70kDa protein 2	NM_021979	NM_021979,NP_068814
ENSG00000131080	258.539	3.70068	0.159297	23.2313	2.19687e-119	2.97111e-117	60401	1	60401	ectodysplasin A2 receptor	ectodysplasin A2 receptor	NM_001199687	NM_001199687,NM_001199688,NM_001199689,NM_001242310,NM_021783,NP_001186616,NP_001229239,NP_068555,XM_005262285,XM_006724675,XM_011531000,XM_011531001,XM_011531002,XM_011531003,XM_011531004,XM_011531005,XM_011531006,XM_011531007,XP_005262342,XP_006724738,XP_011529302,XP_011529303,XP_011529304,XP_011529305,XP_011529306,XP_011529307,XP_011529308,XP_011529309,XR_244499,XR_938404,XR_938405,XR_938406
ENSG00000272077	79.2663	3.70058	0.248875	14.8692	5.22188e-50	1.98661e-48	NA	0	NA	NA	NA	NA	NA
ENSG00000175182	96.7555	3.68059	0.227803	16.1569	1.01538e-58	4.63096e-57	131408	1	131408	family with sequence similarity 131, member A	family with sequence similarity 131, member A	NM_001171093	NM_001171093,NM_144635,NP_001164564,NP_653236,XM_005247113,XM_005247114,XM_011512413,XP_005247170,XP_005247171,XP_011510715
ENSG00000083844	227.573	3.67081	0.175917	20.8667	1.07518e-96	1.04382e-94	9422	1	9422	zinc finger protein 264	zinc finger protein 264	NM_003417	NM_003417,NP_003408,XM_006723507,XM_011527521,XM_011527522,XM_011527523,XP_006723570,XP_011525823,XP_011525824,XP_011525825
ENSG00000136531	41.1769	3.66069	0.268389	13.6395	2.3325e-42	7.17129e-41	6326	1	6326	sodium channel, voltage gated, type II alpha subunit	sodium channel, voltage gated, type II alpha subunit	NM_001040142	NM_001040142,NM_001040143,NM_021007,NP_001035232,NP_001035233,NP_066287,XM_005246750,XM_005246753,XM_005246754,XM_005246755,XM_011511608,XM_011511609,XP_005246807,XP_005246810,XP_005246811,XP_005246812,XP_011509910,XP_011509911
ENSG00000103381	46.4906	3.65685	0.267587	13.666	1.62009e-42	5.00729e-41	55313	1	55313	calcineurin-like phosphoesterase domain containing 1	calcineurin-like phosphoesterase domain containing 1	NM_001099455	NM_001099455,NM_018340,NP_001092925,NP_060810
ENSG00000066923	139.713	3.65595	0.20598	17.7491	1.75214e-70	1.04846e-68	10734	1	10734	stromal antigen 3	stromal antigen 3	NM_001282716	NM_001282716,NM_001282717,NM_001282718,NM_012447,NP_001269645,NP_001269646,NP_001269647,NP_036579,XM_005250116,XM_011515742,XM_011515743,XM_011515744,XM_011515745,XP_005250173,XP_011514044,XP_011514045,XP_011514046,XP_011514047
ENSG00000238222	75.251	3.64725	0.261751	13.934	3.93542e-44	1.26306e-42	NA	0	NA	NA	NA	NA	NA
ENSG00000158691	71.4555	3.64631	0.260202	14.0134	1.2905e-44	4.18196e-43	9753	1	9753	zinc finger and SCAN domain containing 12	zinc finger and SCAN domain containing 12	NM_001039643	NM_001039643,NM_001163391,NM_014724,NP_001156863,NR_028077,XM_006715283,XM_011515013,XM_011515014,XM_011515015,XM_011515016,XM_011515017,XM_011515018,XP_006715346,XP_011513315,XP_011513316,XP_011513317,XP_011513318,XP_011513319,XP_011513320
ENSG00000203326	134.812	3.64173	0.246916	14.7489	3.12833e-49	1.1618e-47	170958	1	170958	zinc finger protein 525	zinc finger protein 525	NR_003699	NR_003699
ENSG00000124721	106.034	3.61694	0.252797	14.3077	1.95923e-46	6.67252e-45	1769	1	1769	dynein, axonemal, heavy chain 8	dynein, axonemal, heavy chain 8	NM_001206927	NM_001206927,NM_001371,NP_001193856,XM_011514318,XM_011514319,XM_011514320,XM_011514321,XM_011514322,XP_011512620,XP_011512621,XP_011512622,XP_011512623,XP_011512624,XR_926078
ENSG00000006757	61.5604	3.61679	0.265881	13.603	3.84271e-42	1.17527e-40	8228	1	8228	patatin-like phospholipase domain containing 4	patatin-like phospholipase domain containing 4	NM_001142389	NM_001142389,NM_001172672,NM_004650,NP_001135861,NP_001166143,NP_004641,XM_011545588,XP_011543890
ENSG00000168004	365.269	3.61612	0.14066	25.7082	9.45592e-146	1.95788e-143	117245	1	117245	HRAS-like suppressor family, member 5	HRAS-like suppressor family, member 5	NM_001146728	NM_001146728,NM_001146729,NM_054108,NP_001140200,NP_001140201,NP_473449,XM_011544751,XM_011544752,XM_011544753,XM_011544754,XP_011543053,XP_011543054,XP_011543055,XP_011543056,XR_428910
ENSG00000104321	160.996	3.61134	0.196989	18.3327	4.5403e-75	3.04382e-73	8989	1	8989	transient receptor potential cation channel, subfamily A, member 1	transient receptor potential cation channel, subfamily A, member 1	NM_007332	NM_007332,NP_015628,XM_011517624,XM_011517625,XP_011515926,XP_011515927
ENSG00000176720	194.003	3.61057	0.176416	20.4661	4.31386e-93	3.92729e-91	666	1	666	BCL2-related ovarian killer	BCL2-related ovarian killer	NM_032515	NM_032515,NP_115904,XM_005247037,XM_005247039,XM_011511696,XM_011511697,XP_005247094,XP_005247096,XP_011509998,XP_011509999
ENSG00000187498	40.7835	3.60121	0.276867	13.007	1.11681e-38	3.13311e-37	1282	1	1282	collagen, type IV, alpha 1	collagen, type IV, alpha 1	NM_001303110	NM_001303110,NM_001845,NP_001290039,NP_001836,XM_011521048,XP_011519350
ENSG00000149292	62.2573	3.59214	0.263989	13.6072	3.62971e-42	1.11158e-40	54970	1	54970	tetratricopeptide repeat domain 12	tetratricopeptide repeat domain 12	NM_017868	NM_017868,NP_060338,XM_005271604,XM_011542884,XM_011542885,XM_011542886,XM_011542887,XM_011542888,XM_011542889,XM_011542890,XP_005271661,XP_011541186,XP_011541187,XP_011541188,XP_011541189,XP_011541190,XP_011541191,XP_011541192,XR_947856
ENSG00000134072	69.8043	3.58974	0.246745	14.5484	5.97827e-48	2.1193e-46	8536	1	8536	calcium/calmodulin-dependent protein kinase I	calcium/calmodulin-dependent protein kinase I	NM_003656	NM_003656,NP_003647,XM_005265516,XM_005265517,XP_005265573,XP_005265574,XR_940505
ENSG00000148408	79.2058	3.58813	0.251233	14.2821	2.83022e-46	9.61085e-45	774	1	774	calcium channel, voltage-dependent, N type, alpha 1B subunit	calcium channel, voltage-dependent, N type, alpha 1B subunit	NM_000718	NM_000718,NM_001243812,NP_000709,NP_001230741,XM_011518990,XM_011518991,XM_011518992,XM_011518993,XM_011518994,XM_011518995,XM_011518996,XM_011518997,XP_011517292,XP_011517293,XP_011517294,XP_011517295,XP_011517296,XP_011517297,XP_011517298,XP_011517299
ENSG00000196917	24.0393	3.58605	0.296609	12.0901	1.19078e-33	2.87222e-32	27198	1	27198	hydroxycarboxylic acid receptor 1	hydroxycarboxylic acid receptor 1	NM_032554	NM_032554,NP_115943
ENSG00000232040	89.5132	3.57616	0.254671	14.0423	8.59155e-45	2.79578e-43	114821	1	114821	zinc finger, BED-type containing 9	zinc finger, BED-type containing 9	NM_052923	NM_052923,NP_443155,XM_006725471,XM_011514283,XM_011514284,XM_011514285,XM_011514286,XM_011514287,XM_011514288,XM_011547183,XM_011547184,XM_011547185,XM_011547186,XM_011547187,XM_011547188,XP_006725534,XP_011512585,XP_011512586,XP_011512587,XP_011512588,XP_011512589,XP_011512590,XP_011545485,XP_011545486,XP_011545487,XP_011545488,XP_011545489,XP_011545490
ENSG00000182986	158.178	3.55963	0.214603	16.587	8.6486e-62	4.20689e-60	162967	1	162967	zinc finger protein 320	zinc finger protein 320	NM_207333	NM_207333,NP_997216,XM_006723059,XP_006723122
ENSG00000229967	78.0874	3.55244	0.25937	13.6964	1.0663e-42	3.32644e-41	NA	0	NA	NA	NA	NA	NA
ENSG00000254585	56.2381	3.55191	0.267091	13.2985	2.36125e-40	6.9932e-39	54551	1	54551	melanoma antigen family L2	melanoma antigen family L2	NM_019066	NM_019066,NP_061939
ENSG00000176884	91.8064	3.53754	0.244939	14.4426	2.79272e-47	9.75241e-46	2902	1	2902	glutamate receptor, ionotropic, N-methyl D-aspartate 1	glutamate receptor, ionotropic, N-methyl D-aspartate 1	NM_000832	NM_000832,NM_001185090,NM_001185091,NM_007327,NM_021569,NP_000823,NP_001172019,NP_001172020,NP_015566,NP_067544,XM_005266071,XM_005266072,XM_005266073,XM_011518583,XP_005266128,XP_005266129,XP_005266130,XP_011516885
ENSG00000156966	65.3688	3.53438	0.252041	14.0231	1.12615e-44	3.65443e-43	93010	1	93010	UDP-GlcNAc:betaGal beta-1,3-N-acetylglucosaminyltransferase 7	UDP-GlcNAc:betaGal beta-1,3-N-acetylglucosaminyltransferase 7	NM_145236	NM_145236,NP_660279,XM_005246953,XP_005247010,XR_923064
ENSG00000074657	70.3653	3.53286	0.225627	15.658	2.92893e-55	1.2437e-53	55205	1	55205	zinc finger protein 532	zinc finger protein 532	NM_018181	NM_018181,NP_060651,XM_005266723,XM_005266724,XM_011526051,XM_011526052,XM_011526053,XM_011526054,XM_011526055,XM_011526056,XM_011526057,XM_011526058,XM_011526059,XM_011526060,XM_011526061,XM_011526062,XM_011526063,XM_011526064,XM_011526065,XM_011526066,XM_011526067,XP_005266780,XP_005266781,XP_011524353,XP_011524354,XP_011524355,XP_011524356,XP_011524357,XP_011524358,XP_011524359,XP_011524360,XP…
ENSG00000189229	71.9933	3.53203	0.247684	14.2602	3.87322e-46	1.31146e-44	NA	0	NA	NA	NA	NA	NA
ENSG00000215808	46.1794	3.53164	0.265113	13.3212	1.74179e-40	5.17165e-39	339535	1	339535	long intergenic non-protein coding RNA 1139	long intergenic non-protein coding RNA 1139	NR_015407	NR_015407
ENSG00000135439	61.1872	3.52421	0.261468	13.4785	2.09203e-41	6.34852e-40	116986	1	116986	ArfGAP with GTPase domain, ankyrin repeat and PH domain 2	ArfGAP with GTPase domain, ankyrin repeat and PH domain 2	NM_001122772	NM_001122772,NM_014770,NP_001116244,NP_055585,XM_005268625,XM_005268626,XP_005268682,XP_005268683,XR_245891
ENSG00000167355	27.2316	3.49167	0.290277	12.0288	2.5088e-33	5.98964e-32	NA	0	NA	NA	NA	NA	NA
ENSG00000136866	58.2916	3.48722	0.263863	13.2161	7.08844e-40	2.05512e-38	7539	1	7539	ZFP37 zinc finger protein	ZFP37 zinc finger protein	NM_001282515	NM_001282515,NM_001282518,NM_003408,NP_001269444,NP_001269447,NP_003399
ENSG00000183117	428.484	3.48342	0.133094	26.1726	5.446e-151	1.22519e-148	64478	1	64478	CUB and Sushi multiple domains 1	CUB and Sushi multiple domains 1	NM_033225	NM_033225,NP_150094,XM_011534752,XM_011534753,XM_011534754,XP_011533054,XP_011533055,XP_011533056
ENSG00000149294	56.2978	3.47919	0.24714	14.0778	5.19854e-45	1.70112e-43	4684	1	4684	neural cell adhesion molecule 1	neural cell adhesion molecule 1	NM_000615	NM_000615,NM_001076682,NM_001242607,NM_001242608,NM_181351,NP_000606,NP_001070150,NP_001229536,NP_001229537,NP_851996
ENSG00000154096	119.263	3.47704	0.206887	16.8065	2.18751e-63	1.10542e-61	7070	1	7070	Thy-1 cell surface antigen	Thy-1 cell surface antigen	NM_001311160	NM_001311160,NM_001311162,NM_006288,NP_001298089,NP_001298091,NP_006279
ENSG00000123388	482.164	3.45374	0.120834	28.5826	1.10426e-179	3.49139e-177	3227	1	3227	homeobox C11	homeobox C11	NM_014212	NM_014212,NP_055027
ENSG00000159212	56.9133	3.44621	0.266917	12.9112	3.89337e-38	1.07548e-36	54102	1	54102	chloride intracellular channel 6	chloride intracellular channel 6	NM_053277	NM_053277,NP_444507,XM_011529650,XP_011527952
ENSG00000213694	80.2127	3.43409	0.23291	14.7443	3.34823e-49	1.23953e-47	1903	1	1903	sphingosine-1-phosphate receptor 3	sphingosine-1-phosphate receptor 3	NM_005226	NM_005226,NP_005217
ENSG00000156345	52.4921	3.43303	0.267544	12.8316	1.09027e-37	2.9905e-36	23552	1	23552	cyclin-dependent kinase 20	cyclin-dependent kinase 20	NM_001039803	NM_001039803,NM_001170639,NM_001170640,NM_012119,NM_178432,NP_001034892,NP_001164110,NP_001164111,NP_036251,NP_848519,XM_011518425,XM_011518426,XM_011518427,XM_011518428,XM_011518429,XM_011518430,XM_011518431,XM_011518432,XM_011518433,XM_011518434,XM_011518435,XM_011518436,XP_011516727,XP_011516728,XP_011516729,XP_011516730,XP_011516731,XP_011516732,XP_011516733,XP_011516734,XP_011516735,XP_01151…
ENSG00000117122	158.382	3.42883	0.188771	18.1639	9.95953e-74	6.43751e-72	4237	1	4237	microfibrillar-associated protein 2	microfibrillar-associated protein 2	NM_001135247	NM_001135247,NM_001135248,NM_002403,NM_017459,NP_001128719,NP_001128720,NP_002394,NP_059453,XM_011541476,XP_011539778
ENSG00000232677	301.333	3.42707	0.154339	22.2049	3.08111e-109	3.678e-107	100506930	1	100506930	long intergenic non-protein coding RNA 665	long intergenic non-protein coding RNA 665	NR_038278	NR_038278,NR_038279
ENSG00000169220	144.069	3.41966	0.193219	17.6983	4.31945e-70	2.56503e-68	10636	1	10636	regulator of G-protein signaling 14	regulator of G-protein signaling 14	NM_006480	NM_006480,NP_006471,XM_005265794,XM_005265795,XP_005265851,XP_005265852
ENSG00000184635	95.2606	3.39954	0.236543	14.3717	7.78569e-47	2.69072e-45	81931	1	81931	zinc finger protein 93	zinc finger protein 93	NM_001004126	NM_001004126,NM_031218,NP_112495,XM_011528339,XP_011526641
ENSG00000234465	40.1368	3.39264	0.271821	12.4811	9.46188e-36	2.46372e-34	390940	1	390940	phospholipase A2 inhibitor and LY6/PLAUR domain containing	phospholipase A2 inhibitor and LY6/PLAUR domain containing	NM_001193621	NM_001193621,NM_001193622,NP_001180550,NP_001180551,XM_005258931,XM_011526970,XM_011526971,XP_005258988,XP_011525272,XP_011525273
ENSG00000175318	49.0297	3.39149	0.272316	12.4542	1.32605e-35	3.43964e-34	196996	1	196996	GRAM domain containing 2	GRAM domain containing 2	NM_001012642	NM_001012642,NP_001012660,XM_011521327,XM_011521328,XM_011521329,XM_011521330,XM_011521331,XM_011521332,XM_011521333,XP_011519629,XP_011519630,XP_011519631,XP_011519632,XP_011519633,XP_011519634,XP_011519635
ENSG00000241472	63.5367	3.3848	0.258204	13.109	2.92375e-39	8.33215e-38	100506994	1	100506994	PTPRG antisense RNA 1	PTPRG antisense RNA 1	NR_038281	NR_038281,NR_038282,NR_038283
ENSG00000223756	79.9205	3.36906	0.244663	13.7702	3.85046e-43	1.20925e-41	650368	1	650368	tumor suppressing subtransferable candidate 2 pseudogene	tumor suppressing subtransferable candidate 2 pseudogene	NR_024248	NR_024248
ENSG00000133134	107.151	3.3658	0.221292	15.2098	3.04456e-52	1.20735e-50	84707	1	84707	brain expressed X-linked 2	brain expressed X-linked 2	NM_001168399	NM_001168399,NM_001168400,NM_001168401,NM_032621,NP_001161871,NP_001161872,NP_001161873,NP_116010
ENSG00000113108	57.0004	3.36432	0.269109	12.5017	7.30806e-36	1.90833e-34	10307	1	10307	amyloid beta (A4) precursor protein-binding, family B, member 3	amyloid beta (A4) precursor protein-binding, family B, member 3	NM_006051	NM_006051,NM_133172,NM_133173,NM_133174,NM_133175,NM_133176,NP_006042,NP_573418,NP_573419,NP_573420
ENSG00000178498	37.7566	3.36141	0.279069	12.0451	2.05827e-33	4.93417e-32	196403	1	196403	deltex 3, E3 ubiquitin ligase	deltex 3, E3 ubiquitin ligase	NM_001286245	NM_001286245,NM_001286246,NM_178502,NP_001273174,NP_001273175,NP_848597,XM_005268697,XM_005268698,XM_005268700,XM_005268703,XM_011538021,XM_011538022,XP_005268754,XP_005268755,XP_005268757,XP_005268760,XP_011536323,XP_011536324
ENSG00000231421	30.2035	3.34875	0.289128	11.5822	5.07021e-31	1.11492e-29	NA	0	NA	NA	NA	NA	NA
ENSG00000046774	22.3013	3.34219	0.297099	11.2494	2.33174e-29	4.80667e-28	51438	1	51438	melanoma antigen family C2	melanoma antigen family C2	NM_016249	NM_016249,NP_057333
ENSG00000184029	43.4075	3.34029	0.27531	12.1328	7.07495e-34	1.72071e-32	10281	1	10281	Down syndrome critical region 4	Down syndrome critical region 4	NM_005867	NM_005867,NP_005858,XM_011529420,XM_011529421,XP_011527722,XP_011527723
ENSG00000164078	38.4833	3.33719	0.276524	12.0683	1.55221e-33	3.72865e-32	4486	1	4486	macrophage stimulating 1 receptor	macrophage stimulating 1 receptor	NM_001244937	NM_001244937,NM_002447,NP_001231866,NP_002438,XM_005265170,XM_011533739,XM_011533740,XM_011533741,XM_011533742,XM_011533743,XM_011533744,XM_011533745,XP_005265227,XP_011532041,XP_011532042,XP_011532043,XP_011532044,XP_011532045,XP_011532046,XP_011532047,XR_245136,XR_940428
ENSG00000132204	73.0324	3.33631	0.263064	12.6825	7.3922e-37	1.98799e-35	NA	0	NA	NA	NA	NA	NA
ENSG00000165863	50.6297	3.33414	0.263115	12.6718	8.47543e-37	2.27669e-35	143379	1	143379	chromosome 10 open reading frame 82	chromosome 10 open reading frame 82	NM_144661	NM_144661,NP_653262,XM_011539340,XM_011539341,XM_011539342,XM_011539343,XM_011539344,XM_011539345,XM_011539346,XM_011539347,XP_011537642,XP_011537643,XP_011537644,XP_011537645,XP_011537646,XP_011537647,XP_011537648,XP_011537649
ENSG00000157601	45.0069	3.32947	0.267477	12.4477	1.43988e-35	3.73078e-34	4599	1	4599	MX dynamin-like GTPase 1	MX dynamin-like GTPase 1	NM_001144925	NM_001144925,NM_001178046,NM_001282920,NM_002462,NP_001138397,NP_001171517,NP_001269849,NP_002453,XM_005260978,XM_005260979,XM_005260980,XM_005260981,XM_005260982,XM_011529568,XM_011529569,XM_011529570,XP_005261035,XP_005261036,XP_005261037,XP_005261038,XP_005261039,XP_011527870,XP_011527871,XP_011527872
ENSG00000228630	154.956	3.29026	0.18853	17.4521	3.31588e-68	1.84718e-66	100124700	1	100124700	HOX transcript antisense RNA	HOX transcript antisense RNA	NR_003716	NR_003716,NR_047517,NR_047518
ENSG00000238129	60.3282	3.28423	0.267982	12.2554	1.57204e-34	3.94223e-33	NA	0	NA	NA	NA	NA	NA
ENSG00000166349	99.1778	3.28043	0.224693	14.5996	2.82468e-48	1.01519e-46	5896	1	5896	recombination activating gene 1	recombination activating gene 1	NM_000448	NM_000448,NP_000439,XM_005253041,XM_011520250,XM_011520251,XP_005253098,XP_011518552,XP_011518553
ENSG00000204434	54.8098	3.27276	0.264823	12.3583	4.3933e-35	1.12216e-33	NA	0	NA	NA	NA	NA	NA
ENSG00000165646	76.8108	3.27022	0.249985	13.0817	4.1917e-39	1.18877e-37	6571	1	6571	solute carrier family 18 (vesicular monoamine transporter), member 2	solute carrier family 18 (vesicular monoamine transporter), member 2	NM_003054	NM_003054,NP_003045
ENSG00000125398	23.8987	3.26166	0.295232	11.0478	2.24647e-28	4.49237e-27	6662	1	6662	SRY (sex determining region Y)-box 9	SRY (sex determining region Y)-box 9	NM_000346	NM_000346,NP_000337
ENSG00000145945	97.9753	3.25843	0.258595	12.6005	2.09773e-36	5.5584e-35	26240	1	26240	family with sequence similarity 50, member B	family with sequence similarity 50, member B	NM_012135	NM_012135,NP_036267
ENSG00000146648	47.4504	3.25669	0.268943	12.1092	9.4374e-34	2.28342e-32	1956	1	1956	epidermal growth factor receptor	epidermal growth factor receptor	NM_005228	NM_005228,NM_201282,NM_201283,NM_201284,NP_005219,NP_958439,NP_958440,NP_958441
ENSG00000105750	114.825	3.25661	0.235598	13.8228	1.85754e-43	5.897e-42	7639	1	7639	zinc finger protein 85	zinc finger protein 85	NM_001256171	NM_001256171,NM_001256172,NM_001256173,NM_003429,NP_001243100,NP_001243101,NP_001243102,NP_003420,NR_045830,XM_011528263,XM_011528264,XM_011547015,XM_011547016,XP_011526565,XP_011526566,XP_011545317,XP_011545318
ENSG00000269190	194.246	3.25459	0.165196	19.7014	2.09904e-86	1.71119e-84	115290	1	115290	F-box protein 17	F-box protein 17	NM_024907	NM_024907,NM_148169,NP_079183,NP_680474,NR_104026
ENSG00000107957	284.189	3.25455	0.133249	24.4245	9.39532e-132	1.53722e-129	9644	1	9644	SH3 and PX domains 2A	SH3 and PX domains 2A	NM_014631	NM_014631,NP_055446,XM_005270294,XM_005270295,XM_005270297,XM_005270298,XM_006718079,XM_006718080,XM_011540385,XM_011540386,XM_011540387,XP_005270351,XP_005270352,XP_005270354,XP_005270355,XP_006718142,XP_006718143,XP_011538687,XP_011538688,XP_011538689
ENSG00000106992	71.3571	3.25016	0.245111	13.2599	3.95244e-40	1.15594e-38	203	1	203	adenylate kinase 1	adenylate kinase 1	NM_000476	NM_000476,NP_000467,XM_005251786,XM_011518348,XM_011518349,XP_005251843,XP_011516650,XP_011516651
ENSG00000112297	202.261	3.24875	0.163565	19.8621	8.65871e-88	7.20954e-86	202	1	202	absent in melanoma 1	absent in melanoma 1	NM_001624	NM_001624,NP_001615,XM_005266839,XP_005266896
ENSG00000265646	42.2814	3.24104	0.273623	11.8449	2.28642e-32	5.29657e-31	NA	0	NA	NA	NA	NA	NA
ENSG00000156009	43.7444	3.24085	0.276294	11.7297	8.97934e-32	2.03575e-30	4107	1	4107	melanoma antigen family A8	melanoma antigen family A8	NM_001166400	NM_001166400,NM_001166401,NM_005364,NP_001159872,NP_001159873,NP_005355
ENSG00000184860	59.5896	3.23801	0.261414	12.3865	3.09256e-35	7.92515e-34	93517	1	93517	short chain dehydrogenase/reductase family 42E, member 1	short chain dehydrogenase/reductase family 42E, member 1	NM_145168	NM_145168,NP_660151,XM_005256257,XM_011523470,XM_011523471,XM_011523472,XP_005256314,XP_011521772,XP_011521773,XP_011521774
ENSG00000278266	50.3043	3.2156	0.272662	11.7933	4.22467e-32	9.68115e-31	NA	0	NA	NA	NA	NA	NA
ENSG00000166426	270.148	3.2137	0.184305	17.4368	4.33353e-68	2.40835e-66	1381	1	1381	cellular retinoic acid binding protein 1	cellular retinoic acid binding protein 1	NM_004378	NM_004378,NP_004369
ENSG00000182022	64.4162	3.20975	0.228423	14.0518	7.51167e-45	2.45119e-43	51363	1	51363	carbohydrate (N-acetylgalactosamine 4-sulfate 6-O) sulfotransferase 15	carbohydrate (N-acetylgalactosamine 4-sulfate 6-O) sulfotransferase 15	NM_001270764	NM_001270764,NM_001270765,NM_014863,NM_015892,NP_001257693,NP_001257694,NP_055678,NP_056976,XM_005269891,XM_005269892,XM_005269893,XM_005269894,XM_006717891,XM_011539857,XP_005269948,XP_005269949,XP_005269950,XP_005269951,XP_006717954,XP_011538159,XR_945773
ENSG00000105146	42.5808	3.20848	0.278268	11.5302	9.29479e-31	2.02486e-29	6795	1	6795	aurora kinase C	aurora kinase C	NM_001015878	NM_001015878,NM_001015879,NM_003160,NP_001015878,NP_001015879,NP_003151,XR_430209
ENSG00000205089	63.6212	3.20413	0.261745	12.2414	1.86728e-34	4.66263e-33	645121	1	645121	cyclin I family, member 2	cyclin I family, member 2	NM_001039780	NM_001039780,NM_001287252,NM_001287253,NP_001034869,NP_001274181,NP_001274182,XM_011543572,XM_011543573,XP_011541874,XP_011541875
ENSG00000156414	24.6388	3.19966	0.294575	10.8619	1.74982e-27	3.40038e-26	122402	1	122402	tudor domain containing 9	tudor domain containing 9	NM_153046	NM_153046,NP_694591,XM_005267309,XM_006720019,XM_006720020,XM_011536396,XM_011536397,XM_011536398,XM_011536399,XM_011536400,XM_011536401,XM_011536402,XP_005267366,XP_006720082,XP_006720083,XP_011534698,XP_011534699,XP_011534700,XP_011534701,XP_011534702,XP_011534703,XP_011534704
ENSG00000267313	60.6827	3.19713	0.262726	12.1691	4.54264e-34	1.11176e-32	641516	1	641516	keratoconus gene 6	keratoconus gene 6	NR_002838	NR_002838
ENSG00000234511	50.6851	3.18915	0.272322	11.711	1.12009e-31	2.52718e-30	133874	1	133874	chromosome 5 open reading frame 58	chromosome 5 open reading frame 58	NM_001102609	NM_001102609,NM_001305393,NM_001305394,NM_001305395,NM_001305396,NM_001305397,NP_001096079,NP_001292322,NP_001292323,NP_001292324,NP_001292325,NP_001292326,NR_131091,NR_131092,XM_011534432,XM_011534433,XP_011532734,XP_011532735
ENSG00000010327	35.8228	3.17851	0.281344	11.2976	1.34843e-29	2.7994e-28	23166	1	23166	stabilin 1	stabilin 1	NM_015136	NM_015136,NP_055951,XM_005264973,XM_005264974,XM_005264975,XM_006713065,XM_011533528,XP_005265030,XP_005265031,XP_005265032,XP_006713128,XP_011531830,XR_940395
ENSG00000176769	43.1894	3.17671	0.276411	11.4927	1.43524e-30	3.10928e-29	256536	1	256536	transcription elongation regulator 1-like	transcription elongation regulator 1-like	NM_174937	NM_174937,NP_777597,XM_011539577,XM_011539578,XP_011537879,XP_011537880
ENSG00000198848	38.7763	3.17285	0.278801	11.3803	5.24033e-30	1.10061e-28	1066	1	1066	carboxylesterase 1	carboxylesterase 1	NM_001025194	NM_001025194,NM_001025195,NM_001266,NP_001020365,NP_001020366,NP_001257,XM_005255774,XM_005276867,XM_011522816,XM_011546995,XP_005255831,XP_005276924,XP_011521118,XP_011545297
ENSG00000121440	191.566	3.17146	0.237576	13.3492	1.19694e-40	3.56295e-39	23024	1	23024	PDZ domain containing ring finger 3	PDZ domain containing ring finger 3	NM_001303139	NM_001303139,NM_001303140,NM_001303141,NM_001303142,NM_015009,NP_001290068,NP_001290069,NP_001290070,NP_001290071,NP_055824
ENSG00000101489	41.3626	3.16996	0.271976	11.6553	2.1555e-31	4.82144e-30	56853	1	56853	CUGBP, Elav-like family member 4	CUGBP, Elav-like family member 4	NM_001025087	NM_001025087,NM_001025088,NM_001025089,NM_020180,NP_001020258,NP_001020259,NP_001020260,NP_064565,XM_005258308,XM_011526079,XM_011526080,XM_011526081,XM_011526082,XM_011526083,XM_011526084,XM_011526085,XM_011526086,XM_011526087,XM_011526088,XM_011526089,XM_011526090,XM_011526091,XM_011526092,XM_011526093,XM_011526094,XM_011526095,XM_011526096,XM_011526097,XP_005258365,XP_011524381,XP_011524382,XP…
ENSG00000142089	37.6533	3.16951	0.26417	11.998	3.63964e-33	8.66295e-32	10410	1	10410	interferon induced transmembrane protein 3	interferon induced transmembrane protein 3	NM_021034	NM_021034,NP_066362,NR_049759
ENSG00000161940	56.4495	3.16028	0.247404	12.7737	2.2982e-37	6.25972e-36	255877	1	255877	B-cell CLL/lymphoma 6, member B	B-cell CLL/lymphoma 6, member B	NM_181844	NM_181844,NP_862827
ENSG00000141485	21.9735	3.15449	0.295858	10.6622	1.52991e-26	2.86821e-25	284111	1	284111	solute carrier family 13 (sodium-dependent citrate transporter), member 5	solute carrier family 13 (sodium-dependent citrate transporter), member 5	NM_001143838	NM_001143838,NM_001284509,NM_001284510,NM_177550,NP_001137310,NP_001271438,NP_001271439,NP_808218,XM_006721504,XM_011523795,XP_006721567,XP_011522097
ENSG00000188002	33.0073	3.15072	0.284167	11.0876	1.44158e-28	2.89517e-27	NA	0	NA	NA	NA	NA	NA
ENSG00000204789	71.3395	3.14296	0.265469	11.8393	2.44546e-32	5.6594e-31	NA	0	NA	NA	NA	NA	NA
ENSG00000103034	139.359	3.14281	0.18323	17.1522	6.04839e-66	3.22356e-64	65009	1	65009	NDRG family member 4	NDRG family member 4	NM_001130487	NM_001130487,NM_001242833,NM_001242834,NM_001242835,NM_001242836,NM_020465,NM_022910,NP_001123959,NP_001229762,NP_001229763,NP_001229764,NP_001229765,NP_065198,NP_075061,NR_040072,XM_006721252,XM_006721253,XM_006721254,XM_006721256,XM_006721257,XM_006721258,XM_006721259,XM_006721260,XM_006721261,XM_006721262,XM_011523290,XM_011523291,XM_011523292,XM_011523293,XM_011523294,XP_006721315,XP_00672131…
ENSG00000138835	142.29	3.13946	0.215052	14.5986	2.86501e-48	1.02811e-46	5998	1	5998	regulator of G-protein signaling 3	regulator of G-protein signaling 3	NM_001276260	NM_001276260,NM_001276261,NM_001276262,NM_001282922,NM_001282923,NM_017790,NM_130795,NM_134427,NM_144488,NM_144489,NP_001263189,NP_001263190,NP_001263191,NP_001269851,NP_001269852,NP_060260,NP_570613,NP_602299,NP_652759,NP_652760,XM_006717219,XM_006717220,XM_006717222,XM_006717224,XM_006717225,XM_006717226,XM_006717230,XM_011518893,XM_011518894,XM_011518895,XM_011518896,XM_011518897,XM_011518898,…
ENSG00000255455	70.539	3.13442	0.251481	12.4639	1.17543e-35	3.05235e-34	103611081	1	103611081	uncharacterized LOC103611081	uncharacterized LOC103611081	NR_125382	NR_125382
ENSG00000251381	28.3498	3.13359	0.288012	10.8801	1.43416e-27	2.79626e-26	100506305	1	100506305	long intergenic non-protein coding RNA 958	long intergenic non-protein coding RNA 958	NR_038904	NR_038904
ENSG00000226887	229.227	3.12772	0.244254	12.8052	1.53292e-37	4.18015e-36	100288413	1	100288413	endogenous retrovirus group MER34, member 1	endogenous retrovirus group MER34, member 1	NM_001242690	NM_001242690,NM_024534,NP_001229619,NP_078810,XR_941039
ENSG00000236279	43.1165	3.12656	0.255067	12.2578	1.52622e-34	3.83144e-33	154790	1	154790	C-type lectin domain family 2, member L	C-type lectin domain family 2, member L	NM_001080511	NM_001080511,NP_001073980
ENSG00000174292	27.7762	3.12361	0.291705	10.7081	9.32546e-27	1.76527e-25	8711	1	8711	tyrosine kinase, non-receptor, 1	tyrosine kinase, non-receptor, 1	NM_001251902	NM_001251902,NM_003985,NP_001238831,NP_003976,XM_011524045,XM_011524046,XM_011524047,XM_011524048,XP_011522347,XP_011522348,XP_011522349,XP_011522350
ENSG00000165633	79.8291	3.10781	0.225465	13.784	3.18242e-43	1.00349e-41	196740	1	196740	V-set and transmembrane domain containing 4	V-set and transmembrane domain containing 4	NM_001031746	NM_001031746,NM_144984,NP_001026916,NP_659421,XM_006717689,XM_011539449,XP_006717752,XP_011537751
ENSG00000087495	35.9078	3.10733	0.272877	11.3873	4.83791e-30	1.02067e-28	116154	1	116154	phosphatase and actin regulator 3	phosphatase and actin regulator 3	NM_001199505	NM_001199505,NM_001199506,NM_001281507,NM_080672,NM_183244,NM_183246,NP_001186434,NP_001186435,NP_001268436,NP_542403,NP_899067,NP_899069,XM_011528525,XM_011528526,XP_011526827,XP_011526828
ENSG00000148942	117.119	3.10579	0.220612	14.0781	5.18135e-45	1.69787e-43	159963	1	159963	solute carrier family 5 (sodium/monocarboxylate cotransporter), member 12	solute carrier family 5 (sodium/monocarboxylate cotransporter), member 12	NM_178498	NM_178498,NP_848593,XM_006718155,XM_006718156,XM_006718157,XM_011519920,XM_011519921,XP_006718218,XP_006718219,XP_006718220,XP_011518222,XP_011518223,XR_930845
ENSG00000181626	28.869	3.10339	0.288846	10.7441	6.31619e-27	1.20244e-25	342850	1	342850	ankyrin repeat domain 62	ankyrin repeat domain 62	NM_001277333	NM_001277333,NP_001264262,XM_003959949,XM_011525658,XP_003959998,XP_011523960
ENSG00000173482	53.0211	3.09895	0.263646	11.7542	6.71766e-32	1.52595e-30	5797	1	5797	protein tyrosine phosphatase, receptor type, M	protein tyrosine phosphatase, receptor type, M	NM_001105244	NM_001105244,NM_002845,NP_001098714,NP_002836,XM_006722335,XM_006722337,XM_011525708,XM_011525709,XM_011525710,XM_011525711,XM_011525712,XM_011525713,XM_011525714,XM_011525715,XM_011525716,XM_011525717,XM_011525718,XM_011525719,XM_011525720,XM_011525721,XM_011525722,XP_006722398,XP_006722400,XP_011524010,XP_011524011,XP_011524012,XP_011524013,XP_011524014,XP_011524015,XP_011524016,XP_011524017,XP…
ENSG00000121310	38.4181	3.09558	0.262587	11.7888	4.46042e-32	1.02014e-30	55268	1	55268	enoyl CoA hydratase domain containing 2	enoyl CoA hydratase domain containing 2	NM_001198961	NM_001198961,NM_001198962,NM_018281,NP_001185890,NP_001185891,NP_060751,XM_005271002,XM_006710740,XM_011541709,XM_011541710,XM_011541711,XM_011541712,XM_011541713,XM_011541714,XM_011541715,XM_011541716,XM_011541717,XM_011541718,XM_011541719,XM_011541720,XM_011541721,XM_011541722,XM_011541723,XM_011541724,XM_011541725,XM_011541726,XM_011541727,XP_005271059,XP_006710803,XP_011540011,XP_011540012,XP…
ENSG00000185100	45.3712	3.09324	0.266154	11.622	3.18664e-31	7.0805e-30	122622	1	122622	adenylosuccinate synthase like 1	adenylosuccinate synthase like 1	NM_152328	NM_152328,NM_199165,NP_689541,NP_954634,XM_006720026,XM_011536412,XM_011536413,XM_011536414,XM_011536415,XP_006720089,XP_011534714,XP_011534715,XP_011534716,XP_011534717
ENSG00000267978	38.495	3.09218	0.28064	11.0183	3.11917e-28	6.20572e-27	728269	1	728269	melanoma antigen family A9B	melanoma antigen family A9B	NM_001080790	NM_001080790,NP_001074259,XM_005278192,XM_005278193,XP_005278249,XP_005278250
ENSG00000142765	36.0665	3.08725	0.27719	11.1377	8.22527e-29	1.672e-27	84958	1	84958	synaptotagmin-like 1	synaptotagmin-like 1	NM_001193308	NM_001193308,NM_032872,NP_001180237,NP_116261,XM_005246022,XM_006710990,XM_006710991,XM_011542316,XM_011542317,XP_005246079,XP_006711053,XP_006711054,XP_011540618,XP_011540619,XR_946784
ENSG00000198046	152.35	3.08404	0.186174	16.5653	1.24082e-61	6.02311e-60	63934	1	63934	zinc finger protein 667	zinc finger protein 667	NM_022103	NM_022103,NP_071386,NR_030740,XM_011527207,XM_011527208,XM_011527209,XM_011527210,XM_011527211,XP_011525509,XP_011525510,XP_011525511,XP_011525512,XP_011525513
ENSG00000113196	43.0858	3.07397	0.272369	11.2861	1.53732e-29	3.18589e-28	9421	1	9421	heart and neural crest derivatives expressed 1	heart and neural crest derivatives expressed 1	NM_004821	NM_004821,NP_004812,XM_005268531,XP_005268588
ENSG00000186281	24.5099	3.07203	0.291771	10.5289	6.35811e-26	1.17412e-24	150763	1	150763	glycerol-3-phosphate acyltransferase 2, mitochondrial	glycerol-3-phosphate acyltransferase 2, mitochondrial	NM_207328	NM_207328,NP_997211,XM_005263882,XM_005263884,XM_005263888,XM_006712302,XM_006712303,XM_006712304,XM_006712305,XM_006712306,XM_006712307,XM_006712308,XM_006712309,XM_006712310,XM_006712311,XM_006712312,XM_006712313,XM_006712315,XP_005263939,XP_005263941,XP_005263945,XP_006712365,XP_006712366,XP_006712367,XP_006712368,XP_006712369,XP_006712370,XP_006712371,XP_006712372,XP_006712373,XP_006712374,XP…
ENSG00000176746	43.463	3.07042	0.27287	11.2523	2.25642e-29	4.65961e-28	158809	1	158809	melanoma antigen family B6	melanoma antigen family B6	NM_173523	NM_173523,NP_775794
ENSG00000108786	117.221	3.06628	0.185774	16.5054	3.35263e-61	1.61735e-59	3292	1	3292	hydroxysteroid (17-beta) dehydrogenase 1	hydroxysteroid (17-beta) dehydrogenase 1	NM_000413	NM_000413,NP_000404,XM_005257292,XM_006721857,XM_006721858,XM_006721859,XM_011524729,XM_011524730,XM_011524731,XM_011524732,XP_005257349,XP_006721920,XP_006721921,XP_006721922,XP_011523031,XP_011523032,XP_011523033,XP_011523034,XR_934451
ENSG00000143032	112.506	3.06267	0.22161	13.8201	1.92783e-43	6.11184e-42	343472	1	343472	BarH-like homeobox 2	BarH-like homeobox 2	NM_020063	NM_020063,NP_064447
ENSG00000268940	52.0045	3.05876	0.256728	11.9144	9.95863e-33	2.33002e-31	541466	1	541466	cancer/testis antigen family 45, member A1	cancer/testis antigen family 45, member A1	NM_001017417	NM_001017417,NP_001017417,XM_005278141,XM_011531352,XP_005278198,XP_011529654
ENSG00000138738	82.3553	3.0565	0.242142	12.6227	1.58206e-36	4.21589e-35	11107	1	11107	PR domain containing 5	PR domain containing 5	NM_001300823	NM_001300823,NM_001300824,NM_018699,NP_001287752,NP_001287753,NP_061169,XM_005262708,XM_011531562,XM_011531563,XM_011531564,XM_011531565,XM_011531566,XM_011531567,XM_011531568,XM_011531569,XM_011531570,XP_005262765,XP_011529864,XP_011529865,XP_011529866,XP_011529867,XP_011529868,XP_011529869,XP_011529870,XP_011529871,XP_011529872,XR_938677,XR_938678,XR_938679,XR_938680
ENSG00000223564	85.3377	3.05425	0.261184	11.6938	1.37033e-31	3.07988e-30	NA	0	NA	NA	NA	NA	NA
ENSG00000240747	76.0225	3.04913	0.265242	11.4957	1.38706e-30	3.00769e-29	100506243	1	100506243	KRAB box domain containing 1	KRAB box domain containing 1	NM_001205272	NM_001205272,NM_015673,NP_001192201
ENSG00000113296	232.489	3.04727	0.163354	18.6544	1.16289e-77	8.17064e-76	7060	1	7060	thrombospondin 4	thrombospondin 4	NM_001306212	NM_001306212,NM_001306213,NM_001306214,NM_003248,NP_001293141,NP_001293142,NP_001293143,NP_003239,XM_011543614,XP_011541916
ENSG00000197162	51.8927	3.04158	0.267217	11.3824	5.11426e-30	1.0751e-28	146540	1	146540	zinc finger protein 785	zinc finger protein 785	NM_152458	NM_152458,NP_689671,XM_011545752,XM_011545753,XM_011545754,XM_011545755,XP_011544054,XP_011544055,XP_011544056,XP_011544057,XR_950748
ENSG00000171160	16.053	3.02462	0.30724	9.84449	7.24079e-23	1.16756e-21	118812	1	118812	MORN repeat containing 4	MORN repeat containing 4	NM_001098831	NM_001098831,NM_178832,NP_001092301,NP_849154,XM_011539250,XM_011539251,XP_011537552,XP_011537553
ENSG00000234284	34.9602	3.01456	0.281685	10.7019	9.97347e-27	1.88185e-25	345462	1	345462	zinc finger protein 879	zinc finger protein 879	NM_001136116	NM_001136116,NP_001129588,XM_005265908,XM_011534550,XM_011534551,XP_005265965,XP_011532852,XP_011532853
ENSG00000164089	57.3235	3.01395	0.25889	11.6418	2.52576e-31	5.62811e-30	64850	1	64850	ethanolamine-phosphate phospho-lyase	ethanolamine-phosphate phospho-lyase	NM_001146590	NM_001146590,NM_001146627,NM_031279,NP_001140062,NP_001140099,NP_112569,NR_027474,NR_027475,XM_006714290,XP_006714353
ENSG00000268916	34.3467	3.01052	0.28261	10.6526	1.69631e-26	3.17508e-25	389903	1	389903	CSAG family, member 3	CSAG family, member 3	NM_001129826	NM_001129826,NM_001129828,NM_203311,NP_001123298,NP_001123300,NR_130638
ENSG00000229847	24.6401	3.00858	0.292357	10.2908	7.75382e-25	1.37021e-23	196047	1	196047	EMX2 opposite strand/antisense RNA	EMX2 opposite strand/antisense RNA	NR_002791	NR_002791
ENSG00000093072	67.7735	3.00372	0.231533	12.9732	1.73592e-38	4.84091e-37	51816	1	51816	cat eye syndrome chromosome region, candidate 1	cat eye syndrome chromosome region, candidate 1	NM_001282225	NM_001282225,NM_001282226,NM_001282227,NM_001282228,NM_001282229,NM_017424,NM_177405,NP_001269154,NP_001269155,NP_001269156,NP_001269157,NP_001269158,NP_803124,XM_006724080,XM_011546133,XP_006724143,XP_011544435
ENSG00000145242	47.2064	2.99284	0.259209	11.5461	7.72795e-31	1.68982e-29	2044	1	2044	EPH receptor A5	EPH receptor A5	NM_001281765	NM_001281765,NM_001281766,NM_001281767,NM_004439,NM_182472,NP_001268694,NP_001268695,NP_001268696,NP_004430,NP_872272,XM_005265653,XM_011531733,XM_011531734,XM_011531735,XM_011531736,XP_005265710,XP_011530035,XP_011530036,XP_011530037,XP_011530038
ENSG00000008323	26.9705	2.99199	0.289758	10.3258	5.38675e-25	9.54801e-24	55200	1	55200	pleckstrin homology domain containing, family G (with RhoGef domain) member 6	pleckstrin homology domain containing, family G (with RhoGef domain) member 6	NM_001144856	NM_001144856,NM_001144857,NM_018173,NP_001138328,NP_001138329,NP_060643,XM_005253704,XM_006718985,XM_011520967,XP_005253761,XP_006719048,XP_011519269,XR_931514
ENSG00000166833	125.173	2.99161	0.204218	14.6491	1.36499e-48	4.95912e-47	89797	1	89797	neuron navigator 2	neuron navigator 2	NM_001111018	NM_001111018,NM_001111019,NM_001244963,NM_145117,NM_182964,NP_001104488,NP_001104489,NP_001231892,NP_660093,NP_892009,XM_005253214,XM_006718364,XM_006718365,XM_006718366,XM_006718367,XM_006718368,XM_006718369,XM_011520444,XM_011520445,XM_011520446,XM_011520447,XM_011520448,XM_011520449,XM_011520450,XM_011520451,XM_011520452,XM_011520453,XM_011520454,XP_005253271,XP_006718427,XP_006718428,XP_00671…
ENSG00000261761	42.2416	2.98923	0.279745	10.6856	1.18914e-26	2.23473e-25	100508631	1	100508631	uncharacterized LOC100508631	uncharacterized LOC100508631	XR_244604	XR_244604,XR_251566
ENSG00000112414	226.702	2.98578	0.15713	19.002	1.64273e-80	1.22795e-78	57211	1	57211	adhesion G protein-coupled receptor G6	adhesion G protein-coupled receptor G6	NM_001032394	NM_001032394,NM_001032395,NM_020455,NM_198569,NP_001027566,NP_001027567,NP_065188,NP_940971,XM_005267061,XM_006715516,XM_006715517,XM_006715518,XM_011535964,XP_005267118,XP_006715579,XP_006715580,XP_006715581,XP_011534266
ENSG00000160161	166.233	2.97817	0.169256	17.5956	2.66042e-69	1.53315e-67	148113	1	148113	cartilage intermediate layer protein 2	cartilage intermediate layer protein 2	NM_153221	NM_153221,NP_694953
ENSG00000151025	52.5442	2.96329	0.246832	12.0053	3.33416e-33	7.94393e-32	57512	1	57512	G protein-coupled receptor 158	G protein-coupled receptor 158	NM_020752	NM_020752,NP_065803,XR_930511,XR_930512
ENSG00000118620	216.907	2.95498	0.155861	18.959	3.71882e-80	2.75346e-78	80264	1	80264	zinc finger protein 430	zinc finger protein 430	NM_001172671	NM_001172671,NM_025189,NP_001166142,NP_079465,XM_005260081,XM_006722909,XP_005260138,XP_006722972
ENSG00000178096	64.4511	2.95187	0.248986	11.8556	2.0132e-32	4.67755e-31	51027	1	51027	bolA family member 1	bolA family member 1	NM_016074	NM_016074,NP_057158,XM_006711348,XP_006711411
ENSG00000128713	122.846	2.93928	0.207903	14.1378	2.22223e-45	7.32302e-44	3237	1	3237	homeobox D11	homeobox D11	NM_021192	NM_021192,NP_067015
ENSG00000185513	44.4075	2.93821	0.266091	11.0421	2.39336e-28	4.78201e-27	26013	1	26013	l(3)mbt-like 1 (Drosophila)	l(3)mbt-like 1 (Drosophila)	NM_015478	NM_015478,NM_032107,NP_056293,NP_115479
ENSG00000204219	34.4579	2.93475	0.26969	10.8819	1.40541e-27	2.74266e-26	6920	1	6920	transcription elongation factor A (SII), 3	transcription elongation factor A (SII), 3	NM_003196	NM_003196,NP_003187,XM_006710864,XM_011542053,XM_011542054,XM_011542055,XM_011542056,XM_011542057,XP_006710927,XP_011540355,XP_011540356,XP_011540357,XP_011540358,XP_011540359
ENSG00000197083	36.4598	2.93292	0.283858	10.3324	5.03083e-25	8.94424e-24	NA	0	NA	NA	NA	NA	NA
ENSG00000102109	37.7113	2.93285	0.274599	10.6805	1.25646e-26	2.35934e-25	27344	1	27344	proprotein convertase subtilisin/kexin type 1 inhibitor	proprotein convertase subtilisin/kexin type 1 inhibitor	NM_013271	NM_013271,NP_037403
ENSG00000152430	33.0685	2.93085	0.285766	10.2561	1.11087e-24	1.94981e-23	66037	1	66037	boule-like RNA-binding protein	boule-like RNA-binding protein	NM_001284358	NM_001284358,NM_001284361,NM_001284362,NM_033030,NM_197970,NP_001271287,NP_001271290,NP_001271291,NP_149019,NP_932074,XM_006712715,XM_011511692,XM_011511693,XM_011511694,XM_011511695,XP_006712778,XP_011509994,XP_011509995,XP_011509996,XP_011509997
ENSG00000164241	17.6551	2.92145	0.301989	9.67402	3.88803e-22	6.07264e-21	401207	1	401207	chromosome 5 open reading frame 63	chromosome 5 open reading frame 63	NM_001164478	NM_001164478,NM_001164479,NP_001157950,NP_001157951,XR_948252,XR_948253,XR_948254,XR_948255,XR_948256,XR_948257,XR_948258,XR_948259,XR_948260,XR_948261
ENSG00000166341	454.535	2.91891	0.119123	24.5034	1.35894e-132	2.30399e-130	8642	1	8642	dachsous cadherin-related 1	dachsous cadherin-related 1	NM_003737	NM_003737,NM_024542,NP_003728
ENSG00000127903	53.5201	2.91866	0.271546	10.7483	6.0371e-27	1.15118e-25	90485	1	90485	zinc finger protein 835	zinc finger protein 835	NM_001005850	NM_001005850,NP_001005850,XM_005259382,XM_005259383,XP_005259439,XP_005259440
ENSG00000253552	43.6189	2.90962	0.266766	10.907	1.06693e-27	2.09071e-26	NA	0	NA	NA	NA	NA	NA
ENSG00000160539	59.4199	2.90734	0.248961	11.6779	1.65378e-31	3.70628e-30	84814	1	84814	phosphatidic acid phosphatase type 2 domain containing 3	phosphatidic acid phosphatase type 2 domain containing 3	NM_032728	NM_032728,NP_116117,XM_005272230,XM_005272231,XP_005272287,XP_005272288
ENSG00000170074	15.8394	2.89408	0.304231	9.51277	1.85659e-21	2.80612e-20	285596	1	285596	family with sequence similarity 153, member A	family with sequence similarity 153, member A	NM_173663	NM_173663,NP_775934,XM_005265889,XM_006714842,XM_006714848,XM_006714849,XM_011534520,XM_011534521,XM_011534522,XM_011534523,XM_011534524,XM_011534525,XM_011534526,XM_011534527,XM_011534528,XP_005265946,XP_006714905,XP_006714911,XP_006714912,XP_011532822,XP_011532823,XP_011532824,XP_011532825,XP_011532826,XP_011532827,XP_011532828,XP_011532829,XP_011532830
ENSG00000075891	201.128	2.89031	0.156046	18.5222	1.36691e-76	9.35133e-75	5076	1	5076	paired box 2	paired box 2	NM_000278	NM_000278,NM_001304569,NM_003987,NM_003988,NM_003989,NM_003990,NP_000269,NP_001291498,NP_003978,NP_003979,NP_003980,NP_003981
ENSG00000248103	35.2761	2.88736	0.284881	10.1353	3.851e-24	6.5864e-23	NA	0	NA	NA	NA	NA	NA
ENSG00000122756	206.747	2.88358	0.160919	17.9195	8.31379e-72	5.07879e-70	1271	1	1271	ciliary neurotrophic factor receptor	ciliary neurotrophic factor receptor	NM_001207011	NM_001207011,NM_001842,NM_147164,NP_001193940,NP_001833,NP_671693,XM_011517707,XP_011516009
ENSG00000174332	35.6274	2.88298	0.276974	10.4089	2.25925e-25	4.06927e-24	148979	1	148979	GLIS family zinc finger 1	GLIS family zinc finger 1	NM_147193	NM_147193,NP_671726,XM_011540785,XP_011539087
ENSG00000100628	33.817	2.88243	0.28181	10.2283	1.48128e-24	2.59412e-23	51676	1	51676	ankyrin repeat and SOCS box containing 2	ankyrin repeat and SOCS box containing 2	NM_001202429	NM_001202429,NM_016150,NP_001189358,NP_057234,XM_005267758,XM_006725165,XM_011536834,XM_011536835,XM_011536836,XM_011546645,XM_011546646,XM_011546647,XP_005267815,XP_006725228,XP_011535136,XP_011535137,XP_011535138,XP_011544947,XP_011544948,XP_011544949
ENSG00000115266	195.066	2.8764	0.168175	17.1036	1.39432e-65	7.39746e-64	10297	1	10297	adenomatosis polyposis coli 2	adenomatosis polyposis coli 2	NM_005883	NM_005883,NP_005874,XM_005259475,XM_006722607,XM_006722608,XM_006722609,XM_006722610,XP_005259532,XP_006722670,XP_006722671,XP_006722672,XP_006722673
ENSG00000159915	49.8725	2.87353	0.264999	10.8435	2.14036e-27	4.13184e-26	353355	1	353355	zinc finger protein 233	zinc finger protein 233	NM_001207005	NM_001207005,NM_181756,NP_001193934,NP_861421
ENSG00000149582	79.9732	2.86899	0.246764	11.6265	3.02368e-31	6.72481e-30	84866	1	84866	transmembrane protein 25	transmembrane protein 25	NM_001144034	NM_001144034,NM_001144035,NM_001144036,NM_001144037,NM_001144038,NM_032780,NP_001137506,NP_001137507,NP_001137508,NP_001137509,NP_001137510,NP_116169,XM_005271703,XM_006718926,XM_006718927,XM_011543036,XM_011543037,XM_011543038,XP_005271760,XP_006718989,XP_006718990,XP_011541338,XP_011541339,XP_011541340
ENSG00000205212	24.6835	2.86342	0.291223	9.8324	8.16526e-23	1.31211e-21	339184	1	339184	coiled-coil domain containing 144 family, N-terminal like	coiled-coil domain containing 144 family, N-terminal like	NM_001004306	NM_001004306,NP_001004306,XM_011523818,XM_011523819,XM_011523820,XM_011523821,XP_011522120,XP_011522121,XP_011522122,XP_011522123
ENSG00000235961	201.712	2.8625	0.157971	18.1204	2.19945e-73	1.40602e-71	84968	1	84968	paraneoplastic Ma antigen family member 6A	paraneoplastic Ma antigen family member 6A	NM_032882	NM_032882,NP_116271
ENSG00000117595	28.4434	2.85772	0.287338	9.94551	2.63819e-23	4.35609e-22	3664	1	3664	interferon regulatory factor 6	interferon regulatory factor 6	NM_001206696	NM_001206696,NM_006147,NP_001193625,NP_006138
ENSG00000279192	22.2268	2.85692	0.295253	9.67616	3.80756e-22	5.95094e-21	8123	1	8123	Prader Willi/Angelman region RNA 5	Prader Willi/Angelman region RNA 5	NR_022008	NR_022008
ENSG00000111275	15.846	2.8559	0.30615	9.32843	1.07451e-20	1.57422e-19	217	1	217	aldehyde dehydrogenase 2 family (mitochondrial)	aldehyde dehydrogenase 2 family (mitochondrial)	NM_000690	NM_000690,NM_001204889,NP_000681,NP_001191818
ENSG00000258927	28.9632	2.85388	0.287405	9.92982	3.08822e-23	5.08839e-22	NA	0	NA	NA	NA	NA	NA
ENSG00000198576	272.352	2.85329	0.127334	22.4079	3.29862e-111	4.10521e-109	23237	1	23237	activity-regulated cytoskeleton-associated protein	activity-regulated cytoskeleton-associated protein	NM_015193	NM_015193,NP_056008
ENSG00000165643	21.3628	2.85014	0.298295	9.55476	1.2387e-21	1.88439e-20	402381	1	402381	spermatogenesis and oogenesis specific basic helix-loop-helix 1	spermatogenesis and oogenesis specific basic helix-loop-helix 1	NM_001012415	NM_001012415,NM_001101677,NP_001012415,NP_001095147,XM_005263403,XM_006717109,XM_011518698,XP_005263460,XP_006717172,XP_011517000
ENSG00000198821	30.4369	2.83987	0.283464	10.0184	1.2651e-23	2.11425e-22	919	1	919	CD247 molecule	CD247 molecule	NM_000734	NM_000734,NM_198053,NP_000725,NP_932170,XM_011510144,XM_011510145,XP_011508446,XP_011508447
ENSG00000241186	100.631	2.83264	0.19394	14.6057	2.58135e-48	9.29166e-47	6997	1	6997	teratocarcinoma-derived growth factor 1	teratocarcinoma-derived growth factor 1	NM_001174136	NM_001174136,NM_003212,NP_001167607,NP_003203
ENSG00000234235	14.6283	2.83243	0.307902	9.19913	3.60875e-20	5.14841e-19	NA	0	NA	NA	NA	NA	NA
ENSG00000205744	57.3487	2.83138	0.260879	10.8532	1.92484e-27	3.73119e-26	79958	1	79958	DENN/MADD domain containing 1C	DENN/MADD domain containing 1C	NM_001290331	NM_001290331,NM_024898,NP_001277260,NP_079174,XM_006722905,XM_006722906,XM_011528318,XP_006722968,XP_006722969,XP_011526620
ENSG00000101986	951.392	2.83047	0.080261	35.2658	1.96797e-272	1.35425e-269	215	1	215	ATP-binding cassette, sub-family D (ALD), member 1	ATP-binding cassette, sub-family D (ALD), member 1	NM_000033	NM_000033,NP_000024,XR_938507
ENSG00000250131	40.29	2.82479	0.270712	10.4346	1.7225e-25	3.13384e-24	NA	0	NA	NA	NA	NA	NA
ENSG00000164932	50.5395	2.81716	0.275454	10.2273	1.49561e-24	2.61727e-23	115908	1	115908	collagen triple helix repeat containing 1	collagen triple helix repeat containing 1	NM_001256099	NM_001256099,NM_138455,NP_001243028,NP_612464,XM_011516824,XP_011515126
ENSG00000247516	46.6156	2.81505	0.277603	10.1406	3.64888e-24	6.259e-23	100505738	1	100505738	MIR4458 host gene	MIR4458 host gene	NR_039989	NR_039989
ENSG00000276476	36.6686	2.81493	0.282274	9.97234	2.01425e-23	3.33999e-22	100506622	1	100506622	long intergenic non-protein coding RNA 540	long intergenic non-protein coding RNA 540	NR_103810	NR_103810
ENSG00000182912	35.2715	2.81178	0.281197	9.99935	1.53405e-23	2.55642e-22	NA	0	NA	NA	NA	NA	NA
ENSG00000010319	81.5573	2.8105	0.216313	12.9927	1.3453e-38	3.76506e-37	56920	1	56920	sema domain, immunoglobulin domain (Ig), short basic domain, secreted, (semaphorin) 3G	sema domain, immunoglobulin domain (Ig), short basic domain, secreted, (semaphorin) 3G	NM_020163	NM_020163,NP_064548
ENSG00000172123	101.329	2.80436	0.21521	13.0308	8.1703e-39	2.30314e-37	55106	1	55106	schlafen family member 12	schlafen family member 12	NM_001289009	NM_001289009,NM_018042,NP_001275938,NP_060512,XM_005257995,XM_011524966,XM_011524967,XP_005258052,XP_011523268,XP_011523269,XR_934498
ENSG00000009950	33.9435	2.80159	0.280299	9.99499	1.60299e-23	2.66941e-22	51085	1	51085	MLX interacting protein-like	MLX interacting protein-like	NM_032951	NM_032951,NM_032952,NM_032953,NM_032954,NM_032994,NP_116569,NP_116570,NP_116571,NP_116572,XM_011516277,XM_011516278,XM_011516279,XM_011516280,XM_011516281,XP_011514579,XP_011514580,XP_011514581,XP_011514582,XP_011514583,XR_927474,XR_927475
ENSG00000163362	54.6365	2.80094	0.275035	10.1839	2.33889e-24	4.05752e-23	55765	1	55765	chromosome 1 open reading frame 106	chromosome 1 open reading frame 106	NM_001142569	NM_001142569,NM_018265,NP_001136041,NP_060735,XM_011509754,XM_011509755,XM_011509756,XP_011508056,XP_011508057,XP_011508058
ENSG00000120068	43.4395	2.78956	0.267892	10.413	2.1629e-25	3.90473e-24	3218	1	3218	homeobox B8	homeobox B8	NM_024016	NM_024016,NP_076921,XM_005257286,XP_005257343
ENSG00000128739	21.4062	2.78908	0.297171	9.38542	6.26643e-21	9.29123e-20	6638	1	6638	small nuclear ribonucleoprotein polypeptide N	small nuclear ribonucleoprotein polypeptide N	NM_003097	NM_003097,NM_022805,NM_022806,NM_022807,NM_022808,NP_003088,NP_073716,NP_073717,NP_073718,NP_073719
ENSG00000203867	73.1515	2.77934	0.233512	11.9023	1.15067e-32	2.68416e-31	282996	1	282996	RNA binding motif protein 20	RNA binding motif protein 20	NM_001134363	NM_001134363,NP_001127835,XM_011539697,XP_011537999
ENSG00000165462	40.2982	2.77469	0.280313	9.89855	4.22365e-23	6.90571e-22	401	1	401	paired-like homeobox 2a	paired-like homeobox 2a	NM_005169	NM_005169,NP_005160
ENSG00000257151	21.8097	2.77459	0.297569	9.32417	1.11853e-20	1.63666e-19	NA	0	NA	NA	NA	NA	NA
ENSG00000129295	51.2136	2.77348	0.258073	10.7469	6.12884e-27	1.16772e-25	23639	1	23639	leucine rich repeat containing 6	leucine rich repeat containing 6	NM_012472	NM_012472,NP_036604,NR_073525,XM_006716538,XM_011516950,XM_011516951,XM_011516952,XM_011516953,XM_011516954,XP_006716601,XP_011515252,XP_011515253,XP_011515254,XP_011515255,XP_011515256,XR_428377
ENSG00000186897	962.073	2.77347	0.0733114	37.8314	0	0	338761	1	338761	complement component 1, q subcomponent-like 4	complement component 1, q subcomponent-like 4	NM_001008223	NM_001008223,NP_001008224,XM_011538270,XP_011536572
ENSG00000163531	72.5601	2.76721	0.227741	12.1507	5.69067e-34	1.38982e-32	23114	1	23114	neurofascin	neurofascin	NM_001005387	NM_001005387,NM_001005388,NM_001005389,NM_001160331,NM_001160332,NM_001160333,NM_015090,NP_001005388,NP_001005389,NP_001153803,NP_001153804,NP_001153805,NP_055905,XM_005244989,XM_005244991,XM_005244992,XM_005244993,XM_005244997,XM_011509311,XM_011509312,XM_011509313,XM_011509314,XM_011509315,XM_011509316,XM_011509317,XM_011509318,XM_011509319,XM_011509320,XM_011509321,XM_011509322,XM_011509323,XM…
ENSG00000177504	57.9106	2.74502	0.273164	10.049	9.28392e-24	1.56835e-22	51480	1	51480	variable charge, X-linked 2	variable charge, X-linked 2	NM_016378	NM_016378,NP_057462
ENSG00000132622	37.3302	2.74341	0.27055	10.1401	3.66669e-24	6.28494e-23	116835	1	116835	heat shock 70kD protein 12B	heat shock 70kD protein 12B	NM_001197327	NM_001197327,NM_052970,NP_001184256,NP_443202,XM_005260656,XM_011529149,XM_011529150,XM_011529151,XM_011529152,XP_005260713,XP_011527451,XP_011527452,XP_011527453,XP_011527454
ENSG00000170873	96.9984	2.74137	0.211081	12.9873	1.44413e-38	4.03684e-37	9788	1	9788	metastasis suppressor 1	metastasis suppressor 1	NM_001282971	NM_001282971,NM_001282974,NM_014751,NP_001269900,NP_001269903,NP_055566,XM_005251111,XM_005251113,XM_005251118,XM_006716700,XM_006716701,XM_006716702,XM_006716703,XM_006716704,XM_006716705,XM_006716706,XM_006716707,XM_011517403,XM_011517404,XM_011517405,XM_011517406,XM_011517407,XM_011517408,XP_005251168,XP_005251170,XP_005251175,XP_006716763,XP_006716764,XP_006716765,XP_006716766,XP_006716767,XP…
ENSG00000125384	23.3224	2.74092	0.28806	9.51511	1.81519e-21	2.74531e-20	5732	1	5732	prostaglandin E receptor 2 (subtype EP2), 53kDa	prostaglandin E receptor 2 (subtype EP2), 53kDa	NM_000956	NM_000956,NP_000947
ENSG00000171345	29.1577	2.73933	0.289724	9.45496	3.23135e-21	4.84641e-20	3880	1	3880	keratin 19, type I	keratin 19, type I	NM_002276	NM_002276,NP_002267
ENSG00000180113	53.3907	2.73696	0.262617	10.4219	1.96991e-25	3.56457e-24	221400	1	221400	tudor domain containing 6	tudor domain containing 6	NM_001010870	NM_001010870,NM_001168359,NP_001010870,NP_001161831
ENSG00000145020	86.3066	2.73325	0.20833	13.1198	2.53583e-39	7.23545e-38	275	1	275	aminomethyltransferase	aminomethyltransferase	NM_000481	NM_000481,NM_001164710,NM_001164711,NM_001164712,NP_000472,NP_001158182,NP_001158183,NP_001158184,NR_028435
ENSG00000122728	38.7113	2.71238	0.270282	10.0354	1.06564e-23	1.79243e-22	6872	2	6872138474	TAF1 RNA polymerase II, TATA box binding protein (TBP)-associated factor, 250kDa	TAF1 RNA polymerase II, TATA box binding protein (TBP)-associated factor, 250kDa	NM_001286074	NM_001286074,NM_004606,NM_138923,NP_001273003,NP_004597,NP_620278,NR_104387,NR_104388,NR_104389,NR_104390,NR_104391,NR_104392,NR_104393,NR_104394,NR_104395,NR_104396,XM_005262295,XM_005262296,XM_005262297,XM_005262300,XM_006724682,XM_011531016,XP_005262352,XP_005262353,XP_005262354,XP_005262357,XP_006724745,XP_011529318,XR_938407
ENSG00000116885	49.4716	2.69722	0.249968	10.7902	3.82762e-27	7.34659e-26	127700	1	127700	organic solute carrier partner 1	organic solute carrier partner 1	NM_145047	NM_145047,NM_206837,NP_659484,NP_996668,XM_005270461,XM_005270462,XM_005270463,XM_006710359,XM_011540680,XM_011540681,XP_005270518,XP_005270519,XP_005270520,XP_006710422,XP_011538982,XP_011538983
ENSG00000087266	199.596	2.69304	0.190729	14.1197	2.87072e-45	9.44674e-44	6452	1	6452	SH3-domain binding protein 2	SH3-domain binding protein 2	NM_001122681	NM_001122681,NM_001145855,NM_001145856,NM_003023,NP_001116153,NP_001139327,NP_001139328,NP_003014,XM_005247998,XM_005247999,XM_011513547,XM_011513548,XM_011513549,XM_011513550,XM_011513551,XM_011513552,XM_011513553,XM_011513554,XM_011513555,XM_011513556,XP_005248055,XP_005248056,XP_011511849,XP_011511850,XP_011511851,XP_011511852,XP_011511853,XP_011511854,XP_011511855,XP_011511856,XP_011511857,XP…
ENSG00000117245	81.669	2.69296	0.210085	12.8184	1.2929e-37	3.53802e-36	57576	1	57576	kinesin family member 17	kinesin family member 17	NM_001122819	NM_001122819,NM_001287212,NM_020816,NP_001116291,NP_001274141,NP_065867,XM_005245950,XM_005245951,XM_011541837,XM_011541838,XM_011541839,XM_011541840,XM_011541841,XM_011541842,XM_011541843,XM_011541844,XM_011541845,XM_011541846,XM_011541847,XP_005246007,XP_005246008,XP_011540139,XP_011540140,XP_011540141,XP_011540142,XP_011540143,XP_011540144,XP_011540145,XP_011540146,XP_011540147,XP_011540148,XP…
ENSG00000238269	31.9113	2.68341	0.288839	9.29033	1.53809e-20	2.23937e-19	389860	1	389860	P antigen family, member 2B	P antigen family, member 2B	NM_001015038	NM_001015038,NP_001015038,XM_011508990,XM_011508991,XM_011508992,XM_011508993,XM_011530785,XM_011530786,XM_011530787,XP_011507292,XP_011507293,XP_011507294,XP_011507295,XP_011529087,XP_011529088,XP_011529089
ENSG00000087245	28.9645	2.68225	0.276817	9.6896	3.3384e-22	5.22816e-21	4313	1	4313	matrix metallopeptidase 2	matrix metallopeptidase 2	NM_001127891	NM_001127891,NM_001302508,NM_001302509,NM_001302510,NM_004530,NP_001121363,NP_001289437,NP_001289438,NP_001289439,NP_004521
ENSG00000172638	39.6163	2.6793	0.268453	9.98053	1.85478e-23	3.07994e-22	30008	1	30008	EGF containing fibulin-like extracellular matrix protein 2	EGF containing fibulin-like extracellular matrix protein 2	NM_016938	NM_016938,NP_058634,NR_037718
ENSG00000228672	274.975	2.67474	0.13814	19.3625	1.59864e-83	1.25515e-81	389333	1	389333	proline-rich basic protein 1	proline-rich basic protein 1	NM_001161546	NM_001161546,NP_001155018
ENSG00000170608	50.1129	2.66898	0.23871	11.1808	5.06237e-29	1.03445e-27	3171	1	3171	forkhead box A3	forkhead box A3	NM_004497	NM_004497,NP_004488
ENSG00000104332	871.453	2.668	0.0820494	32.517	6.13178e-232	3.11881e-229	6422	1	6422	secreted frizzled-related protein 1	secreted frizzled-related protein 1	NM_003012	NM_003012,NP_003003
ENSG00000259129	75.2061	2.66773	0.236293	11.2899	1.47167e-29	3.05255e-28	100506433	1	100506433	long intergenic non-protein coding RNA 648	long intergenic non-protein coding RNA 648	NR_039996	NR_039996
ENSG00000242599	26.8681	2.65786	0.289884	9.1687	4.78746e-20	6.7845e-19	100130935	1	100130935	CSAG family, member 4 (pseudogene)	CSAG family, member 4 (pseudogene)	NM_001025306	NM_001025306,NR_073432
ENSG00000155961	71.2085	2.65456	0.229384	11.5726	5.67443e-31	1.24428e-29	116442	1	116442	RAB39B, member RAS oncogene family	RAB39B, member RAS oncogene family	NM_171998	NM_171998,NP_741995
ENSG00000146013	36.6113	2.65451	0.278348	9.53667	1.47489e-21	2.23787e-20	2676	1	2676	GDNF family receptor alpha 3	GDNF family receptor alpha 3	NM_001496	NM_001496,NP_001487
ENSG00000141736	349.48	2.65202	0.121318	21.86	6.24472e-106	7.05834e-104	2064	1	2064	erb-b2 receptor tyrosine kinase 2	erb-b2 receptor tyrosine kinase 2	NM_001005862	NM_001005862,NM_001289936,NM_001289937,NM_001289938,NM_004448,NP_001005862,NP_001276865,NP_001276866,NP_001276867,NP_004439,NR_110535
ENSG00000198959	34.7204	2.65134	0.262262	10.1095	5.01286e-24	8.54854e-23	7052	1	7052	transglutaminase 2	transglutaminase 2	NM_004613	NM_004613,NM_198951,NP_004604,NP_945189,XM_011529028,XM_011529029,XP_011527330,XP_011527331
ENSG00000259933	39.0227	2.65116	0.282751	9.37631	6.83244e-21	1.01112e-19	NA	0	NA	NA	NA	NA	NA
ENSG00000105641	33.8061	2.6501	0.27664	9.57959	9.74302e-22	1.4948e-20	6528	1	6528	solute carrier family 5 (sodium/iodide cotransporter), member 5	solute carrier family 5 (sodium/iodide cotransporter), member 5	NM_000453	NM_000453,NP_000444,XM_011528192,XM_011528193,XM_011528194,XP_011526494,XP_011526495,XP_011526496
ENSG00000156687	12.0268	2.64417	0.309207	8.55144	1.21558e-17	1.52172e-16	137970	1	137970	unc-5 netrin receptor D	unc-5 netrin receptor D	NM_080872	NM_080872,NP_543148,XM_006716288,XM_011544398,XM_011544399,XM_011544400,XM_011544401,XM_011544402,XM_011544403,XM_011544404,XM_011544405,XP_006716351,XP_011542700,XP_011542701,XP_011542702,XP_011542703,XP_011542704,XP_011542705,XP_011542706,XP_011542707
ENSG00000147082	221.869	2.64137	0.155618	16.9734	1.29215e-64	6.73329e-63	85417	1	85417	cyclin B3	cyclin B3	NM_033031	NM_033031,NM_033670,NM_033671,NP_149020,NP_391990,XM_006724610,XM_011530832,XM_011530833,XP_006724673,XP_011529134,XP_011529135
ENSG00000131849	41.7496	2.63733	0.275938	9.5577	1.20405e-21	1.83644e-20	7691	1	7691	zinc finger protein 132	zinc finger protein 132	NM_003433	NM_003433,NP_003424,XM_005259210,XP_005259267
ENSG00000197712	85.1302	2.63629	0.267809	9.8439	7.28284e-23	1.17272e-21	92689	1	92689	family with sequence similarity 114, member A1	family with sequence similarity 114, member A1	NM_138389	NM_138389,NP_612398,NR_033290,XM_005262672,XM_005262673,XM_006714033,XM_011513763,XP_005262729,XP_005262730,XP_006714096,XP_011512065
ENSG00000084453	118.272	2.63566	0.205232	12.8423	9.49757e-38	2.61122e-36	6579	1	6579	solute carrier organic anion transporter family, member 1A2	solute carrier organic anion transporter family, member 1A2	NM_005075	NM_005075,NM_021094,NM_134431,NP_066580,NP_602307,XM_005253474,XM_005253477,XM_011520818,XM_011520819,XM_011520820,XM_011520821,XP_005253531,XP_005253534,XP_011519120,XP_011519121,XP_011519122,XP_011519123
ENSG00000164659	470.827	2.62909	0.108192	24.3002	1.9498e-130	3.14617e-128	222223	1	222223	KIAA1324-like	KIAA1324-like	NM_001142749	NM_001142749,NM_001291990,NM_001291991,NM_152748,NP_001136221,NP_001278919,NP_001278920,NP_689961,XM_006715894,XM_006715895,XM_011515918,XM_011515919,XM_011515920,XM_011515921,XP_006715957,XP_006715958,XP_011514220,XP_011514221,XP_011514222,XP_011514223
ENSG00000204711	183.3	2.62743	0.158962	16.5287	2.28098e-61	1.10493e-59	138255	1	138255	chromosome 9 open reading frame 135	chromosome 9 open reading frame 135	NM_001010940	NM_001010940,NM_001308084,NM_001308085,NM_001308086,NP_001010940,NP_001295013,NP_001295014,NP_001295015,NR_131756,NR_131757,XM_005251705,XM_011518229,XM_011518230,XM_011518231,XM_011518232,XM_011518233,XM_011518234,XP_005251762,XP_011516531,XP_011516532,XP_011516533,XP_011516534,XP_011516535,XP_011516536
ENSG00000132122	63.8838	2.62689	0.23515	11.1711	5.64539e-29	1.15157e-27	54558	1	54558	spermatogenesis associated 6	spermatogenesis associated 6	NM_001286238	NM_001286238,NM_001286239,NM_019073,NP_001273167,NP_001273168,NP_061946,XM_006710699,XM_006710700,XM_006710701,XM_011541606,XM_011541607,XM_011541608,XM_011541609,XM_011541610,XM_011541611,XP_006710762,XP_006710763,XP_006710764,XP_011539908,XP_011539909,XP_011539910,XP_011539911,XP_011539912,XP_011539913
ENSG00000164176	161.091	2.62439	0.180763	14.5184	9.26216e-48	3.26858e-46	10085	1	10085	EGF-like repeats and discoidin I-like domains 3	EGF-like repeats and discoidin I-like domains 3	NM_001278642	NM_001278642,NM_005711,NP_001265571,NP_005702,XM_011543088,XM_011543089,XP_011541390,XP_011541391
ENSG00000267508	18.0605	2.61171	0.303849	8.59541	8.29651e-18	1.04813e-16	26974	1	26974	zinc finger protein 285	zinc finger protein 285	NM_001291488	NM_001291488,NM_001291489,NM_001291490,NM_001291491,NM_152354,NP_001278417,NP_001278418,NP_001278419,NP_001278420,NP_689567
ENSG00000117477	75.7864	2.60723	0.221689	11.7607	6.21822e-32	1.41663e-30	57821	1	57821	coiled-coil domain containing 181	coiled-coil domain containing 181	NM_001300968	NM_001300968,NM_001300969,NM_021179,NP_001287897,NP_001287898,NP_067002,XM_005245383,XM_011509827,XP_005245440,XP_011508129
ENSG00000154040	438.577	2.60026	0.111415	23.3386	1.79855e-120	2.48997e-118	26256	1	26256	calcium binding tyrosine-(Y)-phosphorylation regulated	calcium binding tyrosine-(Y)-phosphorylation regulated	NM_001308231	NM_001308231,NM_012189,NM_138643,NM_138644,NM_153768,NM_153769,NM_153770,NP_001295160,NP_036321,NP_619584,NP_619585,NP_722452,NP_722453,NP_722454,XM_005258245,XM_005258246,XM_005258247,XM_011525922,XP_005258302,XP_005258303,XP_005258304,XP_011524224
ENSG00000251151	63.3879	2.59525	0.233934	11.094	1.34196e-28	2.70205e-27	100874365	1	100874365	HOXC cluster antisense RNA 3	HOXC cluster antisense RNA 3	NR_047506	NR_047506
ENSG00000115604	31.8824	2.59303	0.287861	9.00792	2.09993e-19	2.87658e-18	8809	1	8809	interleukin 18 receptor 1	interleukin 18 receptor 1	NM_001282399	NM_001282399,NM_003855,NP_001269328,NP_003846,XM_005264039,XM_005264040,XM_006712823,XM_011512099,XP_005264096,XP_005264097,XP_006712886,XP_011510401,XR_923054
ENSG00000047617	23.6113	2.59058	0.294883	8.78514	1.56172e-18	2.04246e-17	57101	1	57101	anoctamin 2, calcium activated chloride channel	anoctamin 2, calcium activated chloride channel	NM_001278596	NM_001278596,NM_001278597,NM_020373,NP_001265525,NP_001265526,XM_006718988,XM_006718990,XM_006718991,XM_011520975,XM_011520976,XM_011520977,XM_011520978,XM_011520979,XM_011520980,XM_011520981,XM_011520982,XM_011520983,XM_011520984,XM_011520985,XP_006719051,XP_006719053,XP_006719054,XP_011519277,XP_011519278,XP_011519279,XP_011519280,XP_011519281,XP_011519282,XP_011519283,XP_011519284,XP_011519285…
ENSG00000265717	25.586	2.59014	0.293533	8.82399	1.10453e-18	1.45839e-17	NA	0	NA	NA	NA	NA	NA
ENSG00000228340	19.9776	2.58964	0.299547	8.64517	5.37241e-18	6.85751e-17	284757	1	284757	MIR646 host gene	MIR646 host gene	NM_001004305	NM_001004305,NR_046099
ENSG00000008517	21.7401	2.58363	0.291779	8.85477	8.3856e-19	1.11794e-17	9235	1	9235	interleukin 32	interleukin 32	NM_001012631	NM_001012631,NM_001012632,NM_001012633,NM_001012634,NM_001012635,NM_001012636,NM_001012718,NM_001308078,NM_004221,NP_001012649,NP_001012650,NP_001012651,NP_001012652,NP_001012653,NP_001012654,NP_001012736,NP_001295007,NP_004212,XM_005255686,XP_005255743
ENSG00000054983	18.118	2.58183	0.300073	8.60401	7.69816e-18	9.7517e-17	2581	1	2581	galactosylceramidase	galactosylceramidase	NM_000153	NM_000153,NM_001037525,NM_001201401,NM_001201402,NP_000144,NP_001188330,NP_001188331,XM_011536618,XP_011534920
ENSG00000178860	10.2503	2.57755	0.309491	8.32834	8.19856e-17	9.87245e-16	9242	1	9242	musculin	musculin	NM_005098	NM_005098,NP_005089
ENSG00000095777	15.8392	2.57406	0.303542	8.48005	2.251e-17	2.79103e-16	53904	1	53904	myosin IIIA	myosin IIIA	NM_017433	NM_017433,NP_059129,XM_011519498,XM_011519499,XM_011519500,XM_011519501,XM_011519502,XM_011519503,XM_011519504,XM_011519505,XM_011519506,XM_011519507,XM_011519508,XM_011519509,XM_011519510,XM_011519511,XM_011519512,XM_011519513,XP_011517800,XP_011517801,XP_011517802,XP_011517803,XP_011517804,XP_011517805,XP_011517806,XP_011517807,XP_011517808,XP_011517809,XP_011517810,XP_011517811,XP_011517812,XP…
ENSG00000135903	11.4713	2.57283	0.30961	8.3099	9.5781e-17	1.14864e-15	5077	1	5077	paired box 3	paired box 3	NM_000438	NM_000438,NM_001127366,NM_013942,NM_181457,NM_181458,NM_181459,NM_181460,NM_181461,NP_000429,NP_001120838,NP_039230,NP_852122,NP_852123,NP_852124,NP_852125,NP_852126,XM_011511278,XM_011511279,XM_011511280,XM_011511281,XP_011509580,XP_011509581,XP_011509582,XP_011509583
ENSG00000187135	20.7452	2.57259	0.293057	8.77847	1.65719e-18	2.16128e-17	342865	1	342865	V-set and transmembrane domain containing 2B	V-set and transmembrane domain containing 2B	NM_001146339	NM_001146339,NP_001139811,XM_005258856,XM_011526902,XM_011526903,XM_011526904,XM_011526905,XP_005258913,XP_011525204,XP_011525205,XP_011525206,XP_011525207
ENSG00000067715	107.975	2.57233	0.212382	12.1118	9.14747e-34	2.21786e-32	6857	1	6857	synaptotagmin I	synaptotagmin I	NM_001135805	NM_001135805,NM_001135806,NM_001291901,NM_005639,NP_001129277,NP_001129278,NP_001278830,NP_005630,XM_005269113,XM_006719576,XM_011538710,XP_005269170,XP_006719639,XP_011537012
ENSG00000237978	42.1713	2.56753	0.27204	9.43807	3.79716e-21	5.6871e-20	NA	0	NA	NA	NA	NA	NA
ENSG00000113790	33.4305	2.5642	0.286559	8.94826	3.61117e-19	4.88103e-18	1962	1	1962	enoyl-CoA, hydratase/3-hydroxyacyl CoA dehydrogenase	enoyl-CoA, hydratase/3-hydroxyacyl CoA dehydrogenase	NM_001166415	NM_001166415,NM_001966,NP_001159887,NP_001957,XM_006713525,XM_011512517,XP_006713588,XP_011510819
ENSG00000180667	398.26	2.55527	0.146408	17.453	3.26363e-68	1.82241e-66	55432	1	55432	YOD1 deubiquitinase	YOD1 deubiquitinase	NM_001276320	NM_001276320,NM_018566,NP_001263249,NP_061036,XM_011509725,XP_011508027,XR_247031
ENSG00000173809	48.6873	2.55229	0.243819	10.468	1.21199e-25	2.21539e-24	91646	1	91646	tudor domain containing 12	tudor domain containing 12	NM_001015890	NM_001015890,NM_001110822,NP_001104292,XM_011527471,XM_011527472,XM_011527473,XM_011527474,XM_011527475,XM_011527476,XM_011527477,XP_011525773,XP_011525774,XP_011525775,XP_011525776,XP_011525777,XP_011525778,XP_011525779
ENSG00000151474	111.532	2.55024	0.176925	14.4142	4.21119e-47	1.45969e-45	55691	1	55691	FERM domain containing 4A	FERM domain containing 4A	NM_018027	NM_018027,NP_060497,XM_005252489,XM_005252490,XM_005252494,XM_005252495,XM_006717457,XM_006717458,XM_006717459,XM_006717460,XM_006717461,XM_006717462,XM_006717464,XM_011519539,XM_011519540,XM_011519541,XM_011519542,XM_011519543,XM_011519544,XM_011519545,XM_011519546,XP_005252546,XP_005252547,XP_005252551,XP_005252552,XP_006717520,XP_006717521,XP_006717522,XP_006717523,XP_006717524,XP_006717525,XP…
ENSG00000138772	43.6458	2.54653	0.281311	9.05236	1.39914e-19	1.93588e-18	306	1	306	annexin A3	annexin A3	NM_005139	NM_005139,NP_005130,XM_011531906,XP_011530208,XR_938727
ENSG00000174607	506.692	2.53916	0.237606	10.6864	1.17829e-26	2.21612e-25	7368	1	7368	UDP glycosyltransferase 8	UDP glycosyltransferase 8	NM_001128174	NM_001128174,NM_003360,NP_001121646,NP_003351,XM_006714302,XM_006714303,XM_011532232,XP_006714365,XP_006714366,XP_011530534
ENSG00000196440	23.8804	2.53349	0.294295	8.60868	7.39076e-18	9.37244e-17	100131755	1	100131755	armadillo repeat containing, X-linked 4	armadillo repeat containing, X-linked 4	NM_001256155	NM_001256155,NM_152583,NP_001243084,NR_028407,NR_045861,NR_045862,NR_045863,NR_045864
ENSG00000223608	21.3553	2.53069	0.298183	8.48704	2.11965e-17	2.63095e-16	NA	0	NA	NA	NA	NA	NA
ENSG00000134595	12.308	2.53066	0.308398	8.20584	2.28986e-16	2.66945e-15	6658	1	6658	SRY (sex determining region Y)-box 3	SRY (sex determining region Y)-box 3	NM_005634	NM_005634,NP_005625
ENSG00000151702	66.1011	2.53043	0.236381	10.7049	9.65465e-27	1.82611e-25	2313	1	2313	Fli-1 proto-oncogene, ETS transcription factor	Fli-1 proto-oncogene, ETS transcription factor	NM_001167681	NM_001167681,NM_001271010,NM_001271012,NM_002017,NP_001161153,NP_001257939,NP_001257941,NP_002008,XM_011542701,XM_011542702,XP_011541003,XP_011541004
ENSG00000274827	22.13	2.53	0.297706	8.49832	1.92356e-17	2.39137e-16	NA	0	NA	NA	NA	NA	NA
ENSG00000133687	315.466	2.52847	0.128059	19.7446	8.93404e-87	7.3602e-85	83857	1	83857	transmembrane and tetratricopeptide repeat containing 1	transmembrane and tetratricopeptide repeat containing 1	NM_001193451	NM_001193451,NM_175861,NP_001180380,NP_787057,XM_005253498,XM_005253499,XM_005253500,XM_005253501,XM_011520866,XM_011520867,XM_011520868,XP_005253555,XP_005253556,XP_005253557,XP_005253558,XP_011519168,XP_011519169,XP_011519170
ENSG00000258708	34.1156	2.52462	0.286138	8.82307	1.11362e-18	1.46873e-17	100129794	1	100129794	SLC25A21 antisense RNA 1	SLC25A21 antisense RNA 1	NR_033240	NR_033240
ENSG00000163879	30.7132	2.52332	0.27783	9.08224	1.06365e-19	1.48309e-18	7802	1	7802	dynein, axonemal, light intermediate chain 1	dynein, axonemal, light intermediate chain 1	NM_003462	NM_003462,NP_003453,XM_005271172,XP_005271229
ENSG00000164627	49.7221	2.52038	0.25421	9.91456	3.59821e-23	5.89548e-22	221458	1	221458	kinesin family member 6	kinesin family member 6	NM_001289020	NM_001289020,NM_001289021,NM_001289024,NM_145027,NP_001275949,NP_001275950,NP_001275953,NP_659464,XM_005248904,XM_011514357,XM_011514358,XM_011514359,XM_011514360,XM_011514361,XP_005248961,XP_011512659,XP_011512660,XP_011512661,XP_011512662,XP_011512663
ENSG00000264575	37.3683	2.51418	0.287047	8.75878	1.97371e-18	2.56692e-17	NA	0	NA	NA	NA	NA	NA
ENSG00000213931	16.8334	2.51311	0.302805	8.29946	1.04589e-16	1.25042e-15	3046	1	3046	hemoglobin, epsilon 1	hemoglobin, epsilon 1	NM_005330	NM_005330,NP_005321,XM_011520036,XP_011518338
ENSG00000140538	29.9407	2.50753	0.287429	8.72399	2.68567e-18	3.4774e-17	4916	1	4916	neurotrophic tyrosine kinase, receptor, type 3	neurotrophic tyrosine kinase, receptor, type 3	NM_001007156	NM_001007156,NM_001012338,NM_001243101,NM_002530,NP_001007157,NP_001012338,NP_001230030,NP_002521,XM_006720543,XM_006720544,XM_006720545,XM_006720546,XM_006720547,XM_006720548,XM_006720549,XM_006720550,XM_011521634,XM_011521635,XM_011521636,XM_011521637,XM_011521638,XP_006720606,XP_006720607,XP_006720608,XP_006720609,XP_006720610,XP_006720611,XP_006720612,XP_006720613,XP_011519936,XP_011519937,XP…
ENSG00000250564	24.0783	2.50272	0.295238	8.47696	2.31147e-17	2.86145e-16	102546229	1	102546229	uncharacterized LOC102546229	uncharacterized LOC102546229	NR_105044	NR_105044
ENSG00000236117	22.4981	2.4997	0.297197	8.41092	4.06793e-17	4.96751e-16	NA	0	NA	NA	NA	NA	NA
ENSG00000062524	434.675	2.49881	0.108364	23.0595	1.18126e-117	1.56146e-115	4058	1	4058	leukocyte receptor tyrosine kinase	leukocyte receptor tyrosine kinase	NM_001135685	NM_001135685,NM_002344,NM_206961,NP_001129157,NP_002335,NP_996844,XM_011521556,XM_011521557,XM_011521558,XP_011519858,XP_011519859,XP_011519860
ENSG00000006283	44.3948	2.4921	0.252912	9.85361	6.61265e-23	1.0707e-21	8913	1	8913	calcium channel, voltage-dependent, T type, alpha 1G subunit	calcium channel, voltage-dependent, T type, alpha 1G subunit	NM_001256324	NM_001256324,NM_001256325,NM_001256326,NM_001256327,NM_001256328,NM_001256329,NM_001256330,NM_001256331,NM_001256332,NM_001256333,NM_001256334,NM_001256359,NM_001256360,NM_001256361,NM_018896,NM_198376,NM_198377,NM_198378,NM_198379,NM_198380,NM_198382,NM_198383,NM_198384,NM_198385,NM_198386,NM_198387,NM_198388,NM_198396,NM_198397,NP_001243253,NP_001243254,NP_001243255,NP_001243256,NP_001243257,NP…
ENSG00000115657	35.6946	2.48548	0.274439	9.05656	1.3463e-19	1.86718e-18	10058	1	10058	ATP-binding cassette, sub-family B (MDR/TAP), member 6 (Langereis blood group)	ATP-binding cassette, sub-family B (MDR/TAP), member 6 (Langereis blood group)	NM_005689	NM_005689,NP_005680
ENSG00000162931	27.4088	2.47962	0.289217	8.57358	1.00317e-17	1.26054e-16	51127	1	51127	tripartite motif containing 17	tripartite motif containing 17	NM_001024940	NM_001024940,NM_001024941,NM_001134855,NM_016102,NP_001020111,NP_001128327,NP_057186,XM_006711779,XM_011544209,XM_011544210,XM_011544211,XP_006711842,XP_011542511,XP_011542512,XP_011542513,XR_949144
ENSG00000121207	80.253	2.47944	0.228315	10.8597	1.79309e-27	3.47869e-26	9227	1	9227	lecithin retinol acyltransferase (phosphatidylcholine--retinol O-acyltransferase)	lecithin retinol acyltransferase (phosphatidylcholine--retinol O-acyltransferase)	NM_001301645	NM_001301645,NM_004744,NP_001288574,NP_004735,XM_006714412,XP_006714475,XR_938793
ENSG00000120075	66.2816	2.47802	0.244044	10.154	3.1805e-24	5.47163e-23	3215	1	3215	homeobox B5	homeobox B5	NM_002147	NM_002147,NP_002138
ENSG00000182230	15.1649	2.4715	0.304797	8.10868	5.11742e-16	5.87499e-15	202134	3	2.02134e+23	family with sequence similarity 153, member B	family with sequence similarity 153, member B	NM_001079529	NM_001079529,NM_001265615,NP_001252544
ENSG00000212747	233.865	2.46276	0.140854	17.4845	1.88176e-68	1.05329e-66	441518	1	441518	family with sequence similarity 127, member C	family with sequence similarity 127, member C	NM_001078173	NM_001078173,NP_001071641
ENSG00000188707	8.97631	2.45914	0.308598	7.96876	1.60273e-15	1.79165e-14	113763	1	113763	ZBED6 C-terminal like	ZBED6 C-terminal like	NM_138434	NM_138434,NP_612443
ENSG00000253706	38.1504	2.45751	0.280996	8.74568	2.21667e-18	2.8797e-17	NA	0	NA	NA	NA	NA	NA
ENSG00000103710	24.351	2.45532	0.293011	8.37963	5.30947e-17	6.44324e-16	51285	1	51285	RAS-like, family 12	RAS-like, family 12	NM_001307930	NM_001307930,NM_016563,NP_001294859,NP_057647,XM_005254433,XM_005254434,XM_011521660,XM_011521661,XP_005254490,XP_005254491,XP_011519962,XP_011519963
ENSG00000175445	208.538	2.45317	0.182899	13.4127	5.09819e-41	1.53122e-39	4023	1	4023	lipoprotein lipase	lipoprotein lipase	NM_000237	NM_000237,NP_000228
ENSG00000101888	3386.92	2.44086	0.0490736	49.7388	0	0	55916	1	55916	nuclear transport factor 2-like export factor 2	nuclear transport factor 2-like export factor 2	NM_001242617	NM_001242617,NM_001242618,NM_018698,NP_001229546,NP_001229547,NP_061168,XM_011530989,XP_011529291
ENSG00000153246	27.0167	2.43808	0.292419	8.33765	7.57837e-17	9.13503e-16	22925	1	22925	phospholipase A2 receptor 1, 180kDa	phospholipase A2 receptor 1, 180kDa	NM_001007267	NM_001007267,NM_001195641,NM_007366,NP_001007268,NP_001182570,NP_031392,XM_005246392,XM_005246393,XM_005246395,XM_006712369,XM_011510820,XM_011510821,XP_005246449,XP_005246450,XP_005246452,XP_006712432,XP_011509122,XP_011509123,XR_922892
ENSG00000213859	35.6426	2.43128	0.264727	9.18411	4.14926e-20	5.89795e-19	147040	1	147040	potassium channel tetramerization domain containing 11	potassium channel tetramerization domain containing 11	NM_001002914	NM_001002914,NP_001002914
ENSG00000124920	224.752	2.43108	0.134587	18.0632	6.20899e-73	3.90515e-71	745	1	745	myelin regulatory factor	myelin regulatory factor	NM_001127392	NM_001127392,NM_013279,NP_001120864,NP_037411,XM_005274222,XM_005274223,XM_005274224,XM_005274225,XM_005274226,XM_005274227,XM_005274228,XM_011545234,XP_005274279,XP_005274280,XP_005274281,XP_005274282,XP_005274283,XP_005274284,XP_005274285,XP_011543536
ENSG00000170927	67.0065	2.42926	0.243384	9.98121	1.84204e-23	3.06095e-22	5314	1	5314	polycystic kidney and hepatic disease 1 (autosomal recessive)	polycystic kidney and hepatic disease 1 (autosomal recessive)	NM_138694	NM_138694,NM_170724,NP_619639,NP_733842,XM_011514679,XM_011514680,XM_011514681,XM_011514682,XM_011514683,XM_011514684,XM_011514685,XM_011514686,XM_011514687,XM_011514688,XM_011514689,XM_011514690,XM_011514691,XP_011512981,XP_011512982,XP_011512983,XP_011512984,XP_011512985,XP_011512986,XP_011512987,XP_011512988,XP_011512989,XP_011512990,XP_011512991,XP_011512992,XP_011512993
ENSG00000166415	586.012	2.42679	0.0992874	24.4421	6.11155e-132	1.02137e-129	256764	1	256764	WD repeat domain 72	WD repeat domain 72	NM_001277176	NM_001277176,NM_182758,NP_001264105,NP_877435,NR_102334,NR_102335,NR_102336,XM_011521433,XM_011521434,XM_011521435,XM_011521436,XM_011521437,XP_011519735,XP_011519736,XP_011519737,XP_011519738,XP_011519739
ENSG00000116819	58.1823	2.41741	0.236833	10.2072	1.84024e-24	3.21315e-23	339488	1	339488	transcription factor AP-2 epsilon (activating enhancer binding protein 2 epsilon)	transcription factor AP-2 epsilon (activating enhancer binding protein 2 epsilon)	NM_178548	NM_178548,NP_848643
ENSG00000170421	195.828	2.41717	0.139535	17.3231	3.14989e-67	1.72595e-65	3856	1	3856	keratin 8, type II	keratin 8, type II	NM_001256282	NM_001256282,NM_001256293,NM_002273,NP_001243211,NP_001243222,NP_002264,NR_045962
ENSG00000213563	647.724	2.41058	0.0874128	27.5769	2.10425e-167	5.65898e-165	414919	1	414919	chromosome 8 open reading frame 82	chromosome 8 open reading frame 82	NM_001001795	NM_001001795,NP_001001795
ENSG00000172985	101.793	2.40812	0.201993	11.9218	9.111e-33	2.13597e-31	344558	1	344558	SH3 domain containing ring finger 3	SH3 domain containing ring finger 3	NM_001099289	NM_001099289,NP_001092759,XM_006712494,XM_011511109,XM_011511110,XM_011511111,XP_006712557,XP_011509411,XP_011509412,XP_011509413
ENSG00000204175	24.2054	2.40807	0.288476	8.34754	6.96975e-17	8.41007e-16	9721	1	9721	G protein regulated inducer of neurite outgrowth 2	G protein regulated inducer of neurite outgrowth 2	NM_014696	NM_014696,NP_055511,XM_005270329,XM_005277666,XM_011540388,XM_011540389,XM_011540390,XM_011540391,XM_011540392,XM_011540393,XM_011540394,XM_011540395,XM_011540396,XM_011540397,XM_011540398,XM_011540399,XM_011540400,XP_005270386,XP_005277723,XP_011538690,XP_011538691,XP_011538692,XP_011538693,XP_011538694,XP_011538695,XP_011538696,XP_011538697,XP_011538698,XP_011538699,XP_011538700,XP_011538701,XP…
ENSG00000131409	82.9334	2.40785	0.236401	10.1855	2.30267e-24	3.99966e-23	94030	1	94030	leucine rich repeat containing 4B	leucine rich repeat containing 4B	NM_001080457	NM_001080457,NP_001073926,XM_005259429,XM_006723506,XM_011527520,XP_005259486,XP_006723569,XP_011525822
ENSG00000180448	1083.93	2.40662	0.06765	35.5746	3.4638e-277	2.53258e-274	23526	1	23526	histocompatibility (minor) HA-1	histocompatibility (minor) HA-1	NM_001258328	NM_001258328,NM_001282334,NM_001282335,NM_012292,NP_001245257,NP_001269263,NP_001269264,NP_036424,XM_006722713,XM_011527857,XM_011527858,XM_011527859,XM_011527860,XP_006722776,XP_011526159,XP_011526160,XP_011526161,XP_011526162
ENSG00000164129	19.7867	2.40613	0.300762	8.00012	1.243e-15	1.39887e-14	4889	1	4889	neuropeptide Y receptor Y5	neuropeptide Y receptor Y5	NM_006174	NM_006174,NP_006165,XM_005263038,XM_011532011,XM_011532012,XM_011532013,XM_011532014,XM_011532015,XM_011532016,XM_011532017,XP_005263095,XP_011530313,XP_011530314,XP_011530315,XP_011530316,XP_011530317,XP_011530318,XP_011530319
ENSG00000074370	261.552	2.40544	0.119187	20.1822	1.40436e-90	1.20801e-88	489	1	489	ATPase, Ca++ transporting, ubiquitous	ATPase, Ca++ transporting, ubiquitous	NM_005173	NM_005173,NM_174953,NM_174954,NM_174955,NM_174956,NM_174957,NM_174958,NP_005164,NP_777613,NP_777614,NP_777615,NP_777616,NP_777617,NP_777618,XM_005256656,XM_011523881,XM_011523882,XM_011523883,XM_011523884,XM_011523885,XM_011523886,XM_011523887,XM_011523888,XM_011523889,XM_011523890,XM_011523891,XM_011523892,XP_005256713,XP_011522183,XP_011522184,XP_011522185,XP_011522186,XP_011522187,XP_011522188…
ENSG00000245680	78.2889	2.39941	0.216938	11.0604	1.95309e-28	3.90901e-27	92285	1	92285	zinc finger protein 585B	zinc finger protein 585B	NM_152279	NM_152279,NP_689492
ENSG00000025708	186.575	2.39181	0.161674	14.794	1.60161e-49	6.01491e-48	1890	1	1890	thymidine phosphorylase	thymidine phosphorylase	NM_001113755	NM_001113755,NM_001113756,NM_001257988,NM_001257989,NM_001953,NP_001107227,NP_001107228,NP_001244917,NP_001244918,NP_001944
ENSG00000253661	47.2691	2.39058	0.270082	8.85132	8.64935e-19	1.15244e-17	100192378	1	100192378	ZFHX4 antisense RNA 1	ZFHX4 antisense RNA 1	NR_024360	NR_024360
ENSG00000079308	86.1439	2.38955	0.199946	11.951	6.417e-33	1.51655e-31	7145	1	7145	tensin 1	tensin 1	NM_001308022	NM_001308022,NM_001308023,NM_022648,NP_001294951,NP_001294952,NP_072174,XM_011511711,XM_011511712,XM_011511713,XM_011511714,XM_011511715,XM_011511716,XM_011511717,XM_011511718,XM_011511719,XM_011511720,XM_011511721,XM_011511722,XM_011511723,XM_011511724,XM_011511725,XM_011511726,XM_011511727,XM_011511728,XP_011510013,XP_011510014,XP_011510015,XP_011510016,XP_011510017,XP_011510018,XP_011510019,XP…
ENSG00000148832	36.7643	2.38243	0.262951	9.06035	1.30033e-19	1.80557e-18	196743	1	196743	polyamine oxidase (exo-N4-amino)	polyamine oxidase (exo-N4-amino)	NM_152911	NM_152911,NM_207125,NM_207126,NM_207127,NM_207128,NM_207129,NP_690875,NP_997010,NP_997011,NR_109763,NR_109764,NR_109765,NR_109766
ENSG00000255836	20.5018	2.37879	0.297621	7.99268	1.32038e-15	1.48524e-14	NA	0	NA	NA	NA	NA	NA
ENSG00000161653	39.0734	2.37635	0.252683	9.40449	5.2283e-21	7.78158e-20	162417	1	162417	N-acetylglutamate synthase	N-acetylglutamate synthase	NM_153006	NM_153006,NP_694551,XM_011524438,XM_011524439,XP_011522740,XP_011522741
ENSG00000167771	524.695	2.37546	0.0937344	25.3425	1.08785e-141	2.15698e-139	283248	1	283248	REST corepressor 2	REST corepressor 2	NM_173587	NM_173587,NP_775858,XM_005273932,XP_005273989
ENSG00000173546	53.0093	2.37106	0.240277	9.86803	5.72774e-23	9.29348e-22	1464	1	1464	chondroitin sulfate proteoglycan 4	chondroitin sulfate proteoglycan 4	NM_001897	NM_001897,NP_001888
ENSG00000004799	40.2912	2.36614	0.269385	8.7835	1.58466e-18	2.06899e-17	5166	1	5166	pyruvate dehydrogenase kinase, isozyme 4	pyruvate dehydrogenase kinase, isozyme 4	NM_002612	NM_002612,NP_002603
ENSG00000235531	11.5699	2.36498	0.308829	7.6579	1.89e-14	1.99101e-13	100132891	1	100132891	MSC antisense RNA 1	MSC antisense RNA 1	NR_033651	NR_033651,NR_033652
ENSG00000126752	12.6185	2.36475	0.309151	7.64917	2.02276e-14	2.12608e-13	6756	1	6756	synovial sarcoma, X breakpoint 1	synovial sarcoma, X breakpoint 1	NM_001278691	NM_001278691,NM_005635,NP_001265620,NP_005626
ENSG00000039068	67.935	2.36467	0.228496	10.3488	4.23631e-25	7.54315e-24	999	1	999	cadherin 1, type 1	cadherin 1, type 1	NM_004360	NM_004360,NP_004351,XM_011523488,XM_011523489,XP_011521790,XP_011521791
ENSG00000243587	39.7049	2.35605	0.270736	8.70239	3.24971e-18	4.1938e-17	NA	0	NA	NA	NA	NA	NA
ENSG00000186642	47.8908	2.35428	0.244906	9.61302	7.04547e-22	1.08735e-20	5138	1	5138	phosphodiesterase 2A, cGMP-stimulated	phosphodiesterase 2A, cGMP-stimulated	NM_001143839	NM_001143839,NM_001146209,NM_001243784,NM_002599,NP_001137311,NP_001139681,NP_001230713,NP_002590,XM_005274040,XM_011545096,XP_005274097,XP_011543398
ENSG00000178922	34.7657	2.34809	0.273956	8.57105	1.02549e-17	1.2872e-16	81888	1	81888	hydroxypyruvate isomerase (putative)	hydroxypyruvate isomerase (putative)	NM_001190880	NM_001190880,NM_001243526,NM_031207,NP_001177809,NP_001230455,NP_112484,XM_005271239,XM_005271240,XM_006710937,XM_011542222,XM_011542223,XM_011542224,XP_005271296,XP_005271297,XP_006711000,XP_011540524,XP_011540525,XP_011540526
ENSG00000260073	43.4866	2.34542	0.283252	8.28032	1.22848e-16	1.4605e-15	NA	0	NA	NA	NA	NA	NA
ENSG00000165621	15.7385	2.34432	0.303537	7.72333	1.13333e-14	1.21302e-13	27199	1	27199	oxoglutarate (alpha-ketoglutarate) receptor 1	oxoglutarate (alpha-ketoglutarate) receptor 1	NM_080818	NM_080818,NP_543008,XM_005254043,XM_005254044,XM_005254045,XM_005254046,XM_011521077,XP_005254100,XP_005254101,XP_005254102,XP_005254103,XP_011519379
ENSG00000083828	171.386	2.34289	0.152542	15.3589	3.08554e-53	1.25117e-51	54807	1	54807	zinc finger protein 586	zinc finger protein 586	NM_001077426	NM_001077426,NM_001204814,NM_017652,NP_001070894,NP_001191743,NP_060122
ENSG00000196604	24.1956	2.34268	0.291795	8.02852	9.86577e-16	1.11836e-14	728378	1	728378	POTE ankyrin domain family, member F	POTE ankyrin domain family, member F	NM_001099771	NM_001099771,NP_001093241,XM_011511761,XM_011511762,XP_011510063,XP_011510064
ENSG00000168140	15.9406	2.33909	0.305026	7.66849	1.74029e-14	1.83744e-13	114990	1	114990	vasorin	vasorin	NM_138440	NM_138440,NP_612449
ENSG00000248131	22.1781	2.3356	0.297976	7.83823	4.56954e-15	4.97042e-14	NA	0	NA	NA	NA	NA	NA
ENSG00000269113	38.9816	2.33159	0.265458	8.78327	1.58787e-18	2.07203e-17	388630	1	388630	TraB domain containing 2B	TraB domain containing 2B	NM_001194986	NM_001194986,NP_001181915,XM_006710640,XM_011541442,XM_011541443,XM_011541444,XM_011541445,XP_006710703,XP_011539744,XP_011539745,XP_011539746,XP_011539747,XR_426606,XR_946653,XR_946654
ENSG00000198033	51.0487	2.32242	0.281542	8.24894	1.59808e-16	1.88936e-15	7278	1	7278	tubulin, alpha 3c	tubulin, alpha 3c	NM_006001	NM_006001,NM_079836,NP_005992
ENSG00000267270	57.4985	2.30781	0.237027	9.73648	2.10734e-22	3.33595e-21	100130522	1	100130522	PARD6G antisense RNA 1	PARD6G antisense RNA 1	NM_001145731	NM_001145731,NM_001145732,NM_001145733,NR_028339,NR_028340
ENSG00000206052	44.1536	2.30756	0.284872	8.10035	5.48002e-16	6.2851e-15	220164	1	220164	docking protein 6	docking protein 6	NM_152721	NM_152721,NP_689934,XM_011525873,XM_011525874,XM_011525875,XM_011525876,XP_011524175,XP_011524176,XP_011524177,XP_011524178
ENSG00000108821	512.578	2.30446	0.0997088	23.1119	3.51116e-118	4.66765e-116	1277	1	1277	collagen, type I, alpha 1	collagen, type I, alpha 1	NM_000088	NM_000088,NP_000079,XM_005257058,XM_005257059,XM_011524341,XP_005257115,XP_005257116,XP_011522643
ENSG00000205358	11.1503	2.30146	0.309636	7.43279	1.0633e-13	1.07141e-12	4496	1	4496	metallothionein 1H	metallothionein 1H	NM_005951	NM_005951,NP_005942
ENSG00000180190	131.03	2.29998	0.266417	8.63301	5.97565e-18	7.59849e-17	157695	1	157695	testis development related protein	testis development related protein	NM_001256113	NM_001256113,NM_175075,NP_001243042,NP_778250,XM_006716232,XM_011534717,XM_011534718,XM_011534719,XM_011534720,XM_011534721,XM_011534722,XM_011534723,XM_011534724,XM_011534725,XM_011549167,XP_006716295,XP_011533019,XP_011533020,XP_011533021,XP_011533022,XP_011533023,XP_011533024,XP_011533025,XP_011533026,XP_011533027,XP_011547469,XR_941338
ENSG00000143320	445.157	2.2968	0.0958955	23.9511	9.00688e-127	1.37735e-124	1382	1	1382	cellular retinoic acid binding protein 2	cellular retinoic acid binding protein 2	NM_001199723	NM_001199723,NM_001878,NP_001186652,NP_001869
ENSG00000072609	314.863	2.29276	0.115275	19.8895	5.01409e-88	4.20483e-86	55743	1	55743	checkpoint with forkhead and ring finger domains, E3 ubiquitin protein ligase	checkpoint with forkhead and ring finger domains, E3 ubiquitin protein ligase	NM_001161344	NM_001161344,NM_001161345,NM_001161346,NM_001161347,NM_018223,NP_001154816,NP_001154817,NP_001154818,NP_001154819,NP_060693
ENSG00000147246	51.1112	2.29002	0.277415	8.25488	1.52056e-16	1.80135e-15	3358	1	3358	5-hydroxytryptamine (serotonin) receptor 2C, G protein-coupled	5-hydroxytryptamine (serotonin) receptor 2C, G protein-coupled	NM_000868	NM_000868,NM_001256760,NM_001256761,NP_000859,NP_001243689,NP_001243690
ENSG00000120498	46.1974	2.28856	0.227304	10.0683	7.62983e-24	1.29453e-22	56159	1	56159	testis expressed 11	testis expressed 11	NM_001003811	NM_001003811,NM_031276,NP_001003811,NP_112566,XM_011530994,XM_011530995,XM_011530996,XP_011529296,XP_011529297,XP_011529298
ENSG00000185222	426.513	2.2873	0.102114	22.3994	3.98703e-111	4.93569e-109	51186	1	51186	WW domain binding protein 5	WW domain binding protein 5	NM_001006612	NM_001006612,NM_001006613,NM_001006614,NM_016303,NP_001006613,NP_001006614,NP_001006615,NP_057387
ENSG00000077327	18.9019	2.28342	0.301587	7.57137	3.69305e-14	3.81654e-13	9576	1	9576	sperm associated antigen 6	sperm associated antigen 6	NM_001253854	NM_001253854,NM_001253855,NM_012443,NM_172242,NP_001240783,NP_001240784,NP_036575,NP_758442,XM_005252645,XM_005252646,XP_005252702,XP_005252703
ENSG00000270816	155.552	2.27901	0.262245	8.69037	3.61254e-18	4.65176e-17	338005	1	338005	long intergenic non-protein coding RNA 221	long intergenic non-protein coding RNA 221	NR_027457	NR_027457
ENSG00000253304	180.002	2.27641	0.151037	15.0718	2.48102e-51	9.6426e-50	399474	1	399474	transmembrane protein 200B	transmembrane protein 200B	NM_001003682	NM_001003682,NM_001171868,NP_001003682,NP_001165339,XM_011541456,XM_011541457,XP_011539758,XP_011539759
ENSG00000179873	22.8953	2.27286	0.289758	7.84399	4.36464e-15	4.75195e-14	204801	1	204801	NLR family, pyrin domain containing 11	NLR family, pyrin domain containing 11	NM_001297743	NM_001297743,NM_145007,NP_001284672,NP_659444
ENSG00000170430	145.182	2.27053	0.164435	13.8081	2.27885e-43	7.21493e-42	4255	1	4255	O-6-methylguanine-DNA methyltransferase	O-6-methylguanine-DNA methyltransferase	NM_002412	NM_002412,NP_002403,XM_005252682,XM_006717863,XM_011539817,XP_005252739,XP_006717926,XP_011538119
ENSG00000253305	39.7881	2.26989	0.267762	8.47728	2.30523e-17	2.85675e-16	56100	1	56100	protocadherin gamma subfamily B, 6	protocadherin gamma subfamily B, 6	NM_018926	NM_018926,NM_032100,NP_061749,NP_115271
ENSG00000197647	40.5824	2.26938	0.262531	8.64424	5.4164e-18	6.9099e-17	163059	1	163059	zinc finger protein 433	zinc finger protein 433	NM_001080411	NM_001080411,NM_001308346,NM_001308348,NM_001308351,NM_001308355,NM_001308357,NM_152602,NP_001073880,NP_001295275,NP_001295277,NP_001295280,NP_001295284,NP_001295286,XM_005259782,XM_006722660,XM_006722661,XM_011527722,XM_011527723,XM_011527724,XM_011527725,XM_011527726,XM_011527727,XM_011527728,XM_011527729,XM_011527730,XM_011527731,XP_005259839,XP_006722723,XP_006722724,XP_011526024,XP_011526025…
ENSG00000196220	124.912	2.26838	0.175198	12.9475	2.42772e-38	6.73801e-37	9901	1	9901	SLIT-ROBO Rho GTPase activating protein 3	SLIT-ROBO Rho GTPase activating protein 3	NM_001033116	NM_001033116,NM_001033117,NM_014850,NP_001028289,NP_055665,XM_011534295,XM_011534296,XM_011534297,XM_011534298,XM_011534299,XM_011534300,XM_011534301,XM_011534302,XM_011534303,XP_011532597,XP_011532598,XP_011532599,XP_011532600,XP_011532601,XP_011532602,XP_011532603,XP_011532604,XP_011532605,XR_427300
ENSG00000173156	23.3964	2.26334	0.294084	7.69624	1.40132e-14	1.48828e-13	29984	1	29984	ras homolog family member D	ras homolog family member D	NM_001300886	NM_001300886,NM_014578,NP_001287815,NP_055393
ENSG00000170315	10.2505	2.26321	0.310273	7.29425	3.00317e-13	2.93138e-12	7314	1	7314	ubiquitin B	ubiquitin B	NM_001281716	NM_001281716,NM_001281717,NM_001281718,NM_001281719,NM_001281720,NM_018955,NP_001268645,NP_001268646,NP_001268647,NP_001268648,NP_001268649,NP_061828
ENSG00000054179	32.3722	2.26126	0.27437	8.24165	1.69847e-16	2.00399e-15	954	1	954	ectonucleoside triphosphate diphosphohydrolase 2	ectonucleoside triphosphate diphosphohydrolase 2	NM_001246	NM_001246,NM_203468,NP_001237,NP_982293,XM_011519211,XM_011519212,XP_011517513,XP_011517514
ENSG00000198142	809.328	2.25923	0.0770375	29.3263	4.78846e-189	1.67217e-186	65124	1	65124	sosondowah ankyrin repeat domain family member C	sosondowah ankyrin repeat domain family member C	NM_023016	NM_023016,NP_075392
ENSG00000250986	19.5882	2.25903	0.299743	7.53656	4.82542e-14	4.96048e-13	NA	0	NA	NA	NA	NA	NA
ENSG00000138207	14.8152	2.25744	0.30559	7.38715	1.50008e-13	1.49796e-12	5950	1	5950	retinol binding protein 4, plasma	retinol binding protein 4, plasma	NM_006744	NM_006744,NP_006735
ENSG00000185668	98.3471	2.25641	0.184463	12.2324	2.08782e-34	5.19668e-33	5453	1	5453	POU class 3 homeobox 1	POU class 3 homeobox 1	NM_002699	NM_002699,NP_002690
ENSG00000261239	15.3449	2.25561	0.304132	7.41653	1.20224e-13	1.20673e-12	NA	0	NA	NA	NA	NA	NA
ENSG00000133169	17.1628	2.25475	0.303433	7.4308	1.07944e-13	1.08666e-12	55859	1	55859	brain expressed, X-linked 1	brain expressed, X-linked 1	NM_018476	NM_018476,NP_060946
ENSG00000224689	14.2343	2.25446	0.305953	7.36866	1.72354e-13	1.71234e-12	729648	1	729648	zinc finger protein 812	zinc finger protein 812	NM_001199814	NM_001199814,NP_001186743,XM_005260045,XM_005260046,XM_005260047,XM_005260048,XM_011528238,XM_011528239,XM_011528240,XM_011528241,XM_011528242,XM_011528243,XM_011528244,XP_005260102,XP_005260103,XP_005260104,XP_005260105,XP_011526540,XP_011526541,XP_011526542,XP_011526543,XP_011526544,XP_011526545,XP_011526546
ENSG00000019505	14.9238	2.24398	0.30455	7.36819	1.72962e-13	1.71765e-12	57586	1	57586	synaptotagmin XIII	synaptotagmin XIII	NM_001247987	NM_001247987,NM_020826,NP_001234916,NP_065877
ENSG00000010361	219.86	2.24271	0.133322	16.8218	1.69019e-63	8.57817e-62	80199	1	80199	fuzzy planar cell polarity protein	fuzzy planar cell polarity protein	NM_001171937	NM_001171937,NM_025129,NP_001165408,NP_079405,NR_033269,XM_006723399,XM_011527339,XM_011527340,XM_011527341,XM_011527342,XM_011527343,XM_011527344,XM_011527345,XM_011527346,XM_011527347,XP_006723462,XP_011525641,XP_011525642,XP_011525643,XP_011525644,XP_011525645,XP_011525646,XP_011525647,XP_011525648,XP_011525649,XR_935862,XR_935863
ENSG00000235590	12.986	2.24023	0.30715	7.2936	3.01778e-13	2.94318e-12	149775	1	149775	GNAS antisense RNA 1	GNAS antisense RNA 1	NR_002785	NR_002785
ENSG00000250682	22.5536	2.23533	0.29418	7.59853	2.99503e-14	3.11305e-13	NA	0	NA	NA	NA	NA	NA
ENSG00000082556	16.6342	2.2304	0.302259	7.37912	1.59333e-13	1.58838e-12	4986	1	4986	opioid receptor, kappa 1	opioid receptor, kappa 1	NM_000912	NM_000912,NM_001282904,NP_000903,NP_001269833
ENSG00000159899	312.033	2.22663	0.116123	19.1747	6.01616e-82	4.63027e-80	4882	1	4882	natriuretic peptide receptor 2	natriuretic peptide receptor 2	NM_000907	NM_000907,NM_003995,NP_003986,XM_005251478,XM_005251479,XM_006716778,XM_011517889,XM_011517890,XM_011517891,XM_011517892,XM_011517893,XM_011517894,XM_011517895,XP_005251535,XP_005251536,XP_006716841,XP_011516191,XP_011516192,XP_011516193,XP_011516194,XP_011516195,XP_011516196,XP_011516197
ENSG00000171951	40.7081	2.22626	0.263757	8.44057	3.15786e-17	3.88253e-16	7857	1	7857	secretogranin II	secretogranin II	NM_003469	NM_003469,NP_003460
ENSG00000171772	11.5245	2.2261	0.309012	7.20394	5.84958e-13	5.58167e-12	93426	1	93426	synaptonemal complex central element protein 1	synaptonemal complex central element protein 1	NM_001143763	NM_001143763,NM_001143764,NM_130784,NM_201564,NP_001137235,NP_001137236,NP_570140
ENSG00000141255	8.28082	2.22567	0.308657	7.21082	5.56167e-13	5.31997e-12	84690	1	84690	spermatogenesis associated 22	spermatogenesis associated 22	NM_001170695	NM_001170695,NM_001170696,NM_001170697,NM_001170698,NM_001170699,NM_032598,NP_001164166,NP_001164167,NP_001164168,NP_001164169,NP_001164170,NP_115987,XM_005256828,XM_005256829,XM_005256830,XM_006721589,XM_006721590,XM_006721591,XM_011524043,XP_005256885,XP_005256886,XP_005256887,XP_006721652,XP_006721653,XP_006721654,XP_011522345
ENSG00000023892	16.5447	2.22097	0.303806	7.31049	2.66167e-13	2.60566e-12	50619	1	50619	DEF6 guanine nucleotide exchange factor	DEF6 guanine nucleotide exchange factor	NM_022047	NM_022047,NP_071330
ENSG00000141934	18.3261	2.22003	0.296827	7.4792	7.47771e-14	7.59687e-13	8612	1	8612	phosphatidic acid phosphatase type 2C	phosphatidic acid phosphatase type 2C	NM_003712	NM_003712,NM_177526,NM_177543,NP_003703,NP_803545,NP_808211,XM_011528396,XP_011526698
ENSG00000188112	39.5115	2.21826	0.245024	9.05324	1.38793e-19	1.92263e-18	647024	1	647024	chromosome 6 open reading frame 132	chromosome 6 open reading frame 132	NM_001164446	NM_001164446,NP_001157918
ENSG00000161958	28.8845	2.21822	0.269087	8.24352	1.67216e-16	1.97394e-15	2256	1	2256	fibroblast growth factor 11	fibroblast growth factor 11	NM_001303460	NM_001303460,NM_004112,NP_001290389,NP_004103,NR_130156
ENSG00000116544	155.705	2.2174	0.154371	14.3641	8.68964e-47	2.9987e-45	58512	1	58512	discs, large (Drosophila) homolog-associated protein 3	discs, large (Drosophila) homolog-associated protein 3	NM_001080418	NM_001080418,NP_001073887,XM_005271091,XM_011541879,XM_011541880,XP_005271148,XP_011540181,XP_011540182
ENSG00000197308	23.049	2.21456	0.295909	7.48392	7.21353e-14	7.33485e-13	399717	1	399717	GATA3 antisense RNA 1	GATA3 antisense RNA 1	NM_207423	NM_207423,NR_024255,NR_024256,NR_104327,NR_104328,NR_104329,NR_104330,NR_104336
ENSG00000272620	18.0142	2.20774	0.298321	7.40056	1.35616e-13	1.35656e-12	84740	1	84740	AFAP1 antisense RNA 1	AFAP1 antisense RNA 1	NM_032654	NM_032654,NR_026892
ENSG00000049089	48.4308	2.2076	0.232898	9.47885	2.57109e-21	3.87102e-20	1298	1	1298	collagen, type IX, alpha 2	collagen, type IX, alpha 2	NM_001852	NM_001852,NP_001843,XM_006710365,XM_011540714,XM_011540715,XM_011540716,XM_011540717,XM_011540718,XP_006710428,XP_011539016,XP_011539017,XP_011539018,XP_011539019,XP_011539020
ENSG00000104611	112.754	2.20749	0.193829	11.3889	4.75178e-30	1.004e-28	63898	1	63898	SH2 domain containing 4A	SH2 domain containing 4A	NM_001174159	NM_001174159,NM_001174160,NM_022071,NP_001167630,NP_001167631,NP_071354,XM_011544610,XM_011544611,XP_011542912,XP_011542913
ENSG00000177551	102.155	2.20669	0.194568	11.3415	8.17504e-30	1.70626e-28	4808	1	4808	nescient helix loop helix 2	nescient helix loop helix 2	NM_001111061	NM_001111061,NM_005599,NP_001104531,NP_005590,XM_006710666,XP_006710729,XR_946659
ENSG00000068985	13.6969	2.19924	0.306869	7.16671	7.68228e-13	7.27701e-12	8712	1	8712	P antigen family, member 1 (prostate associated)	P antigen family, member 1 (prostate associated)	NM_003785	NM_003785,NP_003776,XM_011543998,XM_011543999,XP_011542300,XP_011542301
ENSG00000259540	17.4431	2.19232	0.301838	7.26321	3.78003e-13	3.65914e-12	102723335	1	102723335	uncharacterized LOC102723335	uncharacterized LOC102723335	XR_429626	XR_429626,XR_433196
ENSG00000122378	796.972	2.19043	0.075623	28.9652	1.80659e-184	6.12591e-182	84293	1	84293	family with sequence similarity 213, member A	family with sequence similarity 213, member A	NM_001243778	NM_001243778,NM_001243779,NM_001243780,NM_001243781,NM_001243782,NM_032333,NP_001230707,NP_001230708,NP_001230709,NP_001230710,NP_001230711,NP_115709,XM_011540264,XM_011540265,XM_011540266,XP_011538566,XP_011538567,XP_011538568
ENSG00000130635	16.3716	2.1904	0.306319	7.15072	8.63242e-13	8.14078e-12	1289	1	1289	collagen, type V, alpha 1	collagen, type V, alpha 1	NM_000093	NM_000093,NM_001278074,NP_000084,NP_001265003,XR_929712,XR_929713
ENSG00000007237	9.57102	2.18907	0.309753	7.06713	1.58171e-12	1.4587e-11	8522	1	8522	growth arrest-specific 7	growth arrest-specific 7	NM_001130831	NM_001130831,NM_003644,NM_201432,NM_201433,NP_001124303,NP_003635,NP_958836,NP_958839,XM_005256831,XM_005256832,XM_005256833,XM_005256834,XM_005256835,XM_011524044,XP_005256888,XP_005256889,XP_005256890,XP_005256891,XP_005256892,XP_011522346
ENSG00000215475	21.7738	2.18514	0.299073	7.30638	2.74429e-13	2.68541e-12	283514	1	283514	siah E3 ubiquitin protein ligase family member 3	siah E3 ubiquitin protein ligase family member 3	NM_198849	NM_198849,NP_942146
ENSG00000104059	24.6765	2.18268	0.290118	7.52343	5.33596e-14	5.47808e-13	23359	1	23359	family with sequence similarity 189, member A1	family with sequence similarity 189, member A1	NM_015307	NM_015307,NP_056122,XM_005254261,XM_011521407,XM_011547392,XM_011547393,XM_011547394,XM_011548905,XM_011548906,XM_011548907,XM_011548908,XP_005254318,XP_011519709,XP_011545694,XP_011545695,XP_011545696,XP_011547207,XP_011547208,XP_011547209,XP_011547210
ENSG00000109854	7.95521	2.1794	0.307875	7.07885	1.45353e-12	1.34367e-11	10553	1	10553	HIV-1 Tat interactive protein 2, 30kDa	HIV-1 Tat interactive protein 2, 30kDa	NM_001098520	NM_001098520,NM_001098521,NM_001098522,NM_001098523,NM_006410,NP_001091990,NP_001091991,NP_001091992,NP_001091993,NP_006401
ENSG00000137962	110.078	2.17619	0.189592	11.4783	1.69536e-30	3.65926e-29	9411	1	9411	Rho GTPase activating protein 29	Rho GTPase activating protein 29	NM_004815	NM_004815,NP_004806,XM_006711048,XM_011542438,XM_011542439,XM_011542440,XP_006711111,XP_011540740,XP_011540741,XP_011540742
ENSG00000087253	186.647	2.17377	0.141801	15.3297	4.84377e-53	1.95396e-51	54947	1	54947	lysophosphatidylcholine acyltransferase 2	lysophosphatidylcholine acyltransferase 2	NM_017839	NM_017839,NP_060309,XM_005256006,XM_006721211,XM_011523169,XP_005256063,XP_006721274,XP_011521471
ENSG00000042493	84.441	2.17069	0.199087	10.9032	1.11246e-27	2.1781e-26	822	1	822	capping protein (actin filament), gelsolin-like	capping protein (actin filament), gelsolin-like	NM_001256139	NM_001256139,NM_001256140,NM_001747,NP_001243068,NP_001243069,NP_001738,XM_005264581,XM_011533122,XM_011533123,XP_005264638,XP_011531424,XP_011531425
ENSG00000168899	19.2122	2.17009	0.301272	7.20308	5.8868e-13	5.61261e-12	10791	1	10791	vesicle-associated membrane protein 5	vesicle-associated membrane protein 5	NM_006634	NM_006634,NP_006625
ENSG00000107859	20.8846	2.16573	0.293957	7.36749	1.73873e-13	1.72597e-12	5309	1	5309	paired-like homeodomain 3	paired-like homeodomain 3	NM_005029	NM_005029,NP_005020,XM_011539865,XP_011538167
ENSG00000059915	35.3055	2.16531	0.2612	8.28987	1.13376e-16	1.35214e-15	5662	1	5662	pleckstrin and Sec7 domain containing	pleckstrin and Sec7 domain containing	NM_001270965	NM_001270965,NM_001270966,NM_002779,NP_001257894,NP_001257895,NP_002770,NR_073110,XM_011539968,XM_011539969,XP_011538270,XP_011538271
ENSG00000205363	120.848	2.16422	0.165391	13.0855	3.98676e-39	1.13202e-37	388135	1	388135	chromosome 15 open reading frame 59	chromosome 15 open reading frame 59	NM_001039614	NM_001039614,NM_001303254,NP_001034703,NP_001290183,XM_005254369,XP_005254426
ENSG00000165443	31.1481	2.1587	0.281086	7.67987	1.59256e-14	1.68679e-13	84457	1	84457	phytanoyl-CoA 2-hydroxylase interacting protein-like	phytanoyl-CoA 2-hydroxylase interacting protein-like	NM_001143774	NM_001143774,NM_032439,NP_001137246,NP_115815,XM_011540275,XM_011540276,XP_011538577,XP_011538578
ENSG00000167880	10.5401	2.15221	0.309804	6.94701	3.73114e-12	3.35502e-11	2125	1	2125	envoplakin	envoplakin	NM_001988	NM_001988,NP_001979,XM_011524516,XP_011522818
ENSG00000143195	272.912	2.15213	0.15721	13.6895	1.17234e-42	3.65237e-41	387597	1	387597	immunoglobulin-like domain containing receptor 2	immunoglobulin-like domain containing receptor 2	NM_199351	NM_199351,NP_955383,XM_006711308,XM_006711309,XM_006711314,XM_011509526,XM_011509527,XM_011509528,XM_011509529,XM_011509530,XP_006711371,XP_006711372,XP_006711377,XP_011507828,XP_011507829,XP_011507830,XP_011507831,XP_011507832
ENSG00000182968	50.9545	2.14911	0.24584	8.74192	2.29185e-18	2.97572e-17	6656	1	6656	SRY (sex determining region Y)-box 1	SRY (sex determining region Y)-box 1	NM_005986	NM_005986,NP_005977
ENSG00000139973	27.956	2.14772	0.291385	7.37073	1.69699e-13	1.68668e-12	83851	1	83851	synaptotagmin XVI	synaptotagmin XVI	NM_031914	NM_031914,NP_114120,XM_006720272,XM_011537218,XM_011537219,XM_011537220,XM_011537221,XM_011537222,XM_011537223,XM_011537224,XM_011537225,XM_011537227,XM_011537228,XM_011537229,XM_011537230,XP_006720335,XP_011535520,XP_011535521,XP_011535522,XP_011535523,XP_011535524,XP_011535525,XP_011535526,XP_011535527,XP_011535529,XP_011535530,XP_011535531,XP_011535532,XR_943545,XR_943546,XR_943547
ENSG00000229375	31.6853	2.14751	0.294863	7.28308	3.26274e-13	3.17547e-12	NA	0	NA	NA	NA	NA	NA
ENSG00000204624	17.2364	2.14396	0.300361	7.13794	9.47383e-13	8.89483e-12	57540	1	57540	patched domain containing 2	patched domain containing 2	NM_020780	NM_020780,NP_065831,XM_011541828,XM_011541829,XM_011541830,XM_011541831,XM_011541832,XM_011541833,XM_011541834,XM_011541835,XP_011540130,XP_011540131,XP_011540132,XP_011540133,XP_011540134,XP_011540135,XP_011540136,XP_011540137,XR_946717
ENSG00000242407	22.4388	2.14032	0.300311	7.12702	1.02564e-12	9.59872e-12	NA	0	NA	NA	NA	NA	NA
ENSG00000100228	66.5687	2.1383	0.219601	9.73721	2.09217e-22	3.31419e-21	9609	1	9609	RAB36, member RAS oncogene family	RAB36, member RAS oncogene family	NM_004914	NM_004914,NP_004905,XM_005261859,XM_006724381,XM_006724382,XM_011530544,XM_011530545,XM_011530546,XM_011530547,XM_011530548,XM_011530549,XM_011530550,XM_011530551,XM_011530552,XP_005261916,XP_006724444,XP_006724445,XP_011528846,XP_011528847,XP_011528848,XP_011528849,XP_011528850,XP_011528851,XP_011528852,XP_011528853,XP_011528854
ENSG00000228903	23.7849	2.13824	0.289957	7.37432	1.65185e-13	1.64321e-12	NA	0	NA	NA	NA	NA	NA
ENSG00000171551	52.9062	2.13449	0.263858	8.08953	5.98956e-16	6.85941e-15	9427	1	9427	endothelin converting enzyme-like 1	endothelin converting enzyme-like 1	NM_001290787	NM_001290787,NM_004826,NP_001277716,NP_004817
ENSG00000205777	7.54552	2.1305	0.307538	6.9276	4.28025e-12	3.81796e-11	2543	2	2543100008586	G antigen 1	G antigen 1	NM_001040663	NM_001040663,NM_001468,NP_001035753,NR_102272,XM_011543896,XP_011542198
ENSG00000145423	189.339	2.12785	0.264742	8.03743	9.17407e-16	1.04146e-14	6423	1	6423	secreted frizzled-related protein 2	secreted frizzled-related protein 2	NM_003013	NM_003013,NP_003004
ENSG00000152137	8.54982	2.12769	0.309996	6.8636	6.71482e-12	5.90182e-11	26353	1	26353	heat shock 22kDa protein 8	heat shock 22kDa protein 8	NM_014365	NM_014365,NP_055180
ENSG00000005243	23.8542	2.12419	0.293311	7.2421	4.41784e-13	4.24843e-12	51226	1	51226	coatomer protein complex, subunit zeta 2	coatomer protein complex, subunit zeta 2	NM_016429	NM_016429,NP_057513,XM_011524874,XP_011523176,XR_934471,XR_934472,XR_934473,XR_934474
ENSG00000007314	15.4807	2.12093	0.305151	6.95042	3.64212e-12	3.27875e-11	6329	1	6329	sodium channel, voltage gated, type IV alpha subunit	sodium channel, voltage gated, type IV alpha subunit	NM_000334	NM_000334,NP_000325,XM_005257566,XP_005257623
ENSG00000221887	72.2361	2.11769	0.210498	10.0604	8.26628e-24	1.40048e-22	284293	1	284293	histocompatibility (minor) serpin domain containing	histocompatibility (minor) serpin domain containing	NM_001123366	NM_001123366,NP_001116838,XM_011525930,XP_011524232
ENSG00000185149	20.3671	2.11729	0.301371	7.02553	2.13254e-12	1.95513e-11	4887	1	4887	neuropeptide Y receptor Y2	neuropeptide Y receptor Y2	NM_000910	NM_000910,NP_000901,XM_005263033,XM_005263034,XP_005263090,XP_005263091
ENSG00000061337	68.0598	2.11246	0.219703	9.61509	6.90501e-22	1.06708e-20	11178	1	11178	leucine zipper, putative tumor suppressor 1	leucine zipper, putative tumor suppressor 1	NM_021020	NM_021020,NP_066300,XM_005273394,XM_011544383,XM_011544384,XM_011544385,XM_011544386,XM_011544387,XP_005273451,XP_011542685,XP_011542686,XP_011542687,XP_011542688,XP_011542689
ENSG00000166831	1011.78	2.1103	0.0683244	30.8864	1.8185e-209	8.02783e-207	348093	1	348093	RNA binding protein with multiple splicing 2	RNA binding protein with multiple splicing 2	NM_194272	NM_194272,NP_919248
ENSG00000136274	84.4751	2.10958	0.202865	10.3989	2.50811e-25	4.50708e-24	23148	1	23148	NAC alpha domain containing	NAC alpha domain containing	NM_001146334	NM_001146334,NP_001139806,XM_006715674,XP_006715737
ENSG00000081853	35.6611	2.10946	0.268031	7.8702	3.54081e-15	3.89123e-14	56113	1	56113	protocadherin gamma subfamily A, 2	protocadherin gamma subfamily A, 2	NM_018915	NM_018915,NM_032009,NP_061738,NP_114398
ENSG00000163462	22.8842	2.10905	0.289833	7.27678	3.41886e-13	3.32188e-12	80128	1	80128	tripartite motif containing 46	tripartite motif containing 46	NM_001256599	NM_001256599,NM_001256600,NM_001256601,NM_001282378,NM_001282379,NM_025058,NP_001243528,NP_001243529,NP_001243530,NP_001269307,NP_001269308,NP_079334,NR_046327,NR_046329,NR_104150,XM_011510001,XM_011510002,XM_011510003,XM_011510004,XP_011508303,XP_011508304,XP_011508305,XP_011508306,XR_921953,XR_921954
ENSG00000229089	53.4988	2.1076	0.26847	7.85041	4.1469e-15	4.5212e-14	NA	0	NA	NA	NA	NA	NA
ENSG00000224271	16.2049	2.10439	0.304315	6.91519	4.67236e-12	4.15504e-11	284930	1	284930	uncharacterized LOC284930	uncharacterized LOC284930	NR_122046	NR_122046
ENSG00000225280	29.1918	2.10412	0.277756	7.57542	3.57964e-14	3.70096e-13	NA	0	NA	NA	NA	NA	NA
ENSG00000172575	191.792	2.10055	0.137284	15.3007	7.56284e-53	3.02993e-51	10125	1	10125	RAS guanyl releasing protein 1 (calcium and DAG-regulated)	RAS guanyl releasing protein 1 (calcium and DAG-regulated)	NM_001128602	NM_001128602,NM_001306086,NM_005739,NP_001122074,NP_001293015,NP_005730,XM_005254114,XM_011521151,XM_011521152,XM_011521153,XM_011521154,XP_005254171,XP_011519453,XP_011519454,XP_011519455,XP_011519456,XR_931740
ENSG00000270574	19.2598	2.09811	0.301331	6.96281	3.3354e-12	3.0154e-11	NA	0	NA	NA	NA	NA	NA
ENSG00000028137	52.0843	2.09265	0.229086	9.13478	6.55413e-20	9.24333e-19	7133	1	7133	tumor necrosis factor receptor superfamily, member 1B	tumor necrosis factor receptor superfamily, member 1B	NM_001066	NM_001066,NP_001057,XM_011542060,XM_011542061,XM_011542062,XM_011542063,XP_011540362,XP_011540363,XP_011540364,XP_011540365
ENSG00000234722	7.05303	2.09253	0.304954	6.86178	6.80077e-12	5.97288e-11	103724390	1	103724390	long intergenic non-protein coding RNA 1287	long intergenic non-protein coding RNA 1287	NR_125776	NR_125776
ENSG00000164695	127.347	2.09064	0.167964	12.447	1.45257e-35	3.75949e-34	92421	1	92421	charged multivesicular body protein 4C	charged multivesicular body protein 4C	NM_152284	NM_152284,NP_689497
ENSG00000183196	229.768	2.08851	0.128055	16.3094	8.45515e-60	3.94861e-58	4166	1	4166	carbohydrate (N-acetylglucosamine 6-O) sulfotransferase 6	carbohydrate (N-acetylglucosamine 6-O) sulfotransferase 6	NM_021615	NM_021615,NP_067628,XM_005255955,XM_011523085,XP_005256012,XP_011521387
ENSG00000172901	26.5707	2.08723	0.291066	7.171	7.44498e-13	7.06368e-12	206338	1	206338	laeverin	laeverin	NM_173800	NM_173800,NP_776161,XM_005271919,XM_011543261,XM_011543262,XM_011543263,XM_011543264,XM_011543265,XP_005271976,XP_011541563,XP_011541564,XP_011541565,XP_011541566,XP_011541567,XR_427708,XR_948243
ENSG00000183833	14.0431	2.08288	0.306402	6.79786	1.06188e-11	9.22566e-11	89876	1	89876	MYCBP-associated, testis expressed 1	MYCBP-associated, testis expressed 1	NM_033364	NM_033364,NP_203528,XM_011513275,XM_011513276,XM_011513277,XM_011513278,XP_011511577,XP_011511578,XP_011511579,XP_011511580,XR_924210,XR_924211
ENSG00000269834	17.0498	2.08171	0.30322	6.86532	6.63413e-12	5.83969e-11	102724105	1	102724105	ZNF528 antisense RNA 1	ZNF528 antisense RNA 1	NR_125345	NR_125345
ENSG00000120820	34.2618	2.07983	0.272543	7.63122	2.32541e-14	2.43217e-13	83468	1	83468	glycosyltransferase 8 domain containing 2	glycosyltransferase 8 domain containing 2	NM_031302	NM_031302,NP_112592,XM_005269171,XM_011538793,XM_011538794,XP_005269228,XP_011537095,XP_011537096
ENSG00000076864	147.854	2.07721	0.155718	13.3396	1.36245e-40	4.05049e-39	5909	1	5909	RAP1 GTPase activating protein	RAP1 GTPase activating protein	NM_001145657	NM_001145657,NM_001145658,NM_002885,NP_001139129,NP_001139130,NP_002876,XM_005245955,XM_006710804,XM_006710805,XP_005246012,XP_006710867,XP_006710868,XR_946725,XR_946726,XR_946727,XR_946728,XR_946729,XR_946730,XR_946731,XR_946732,XR_946733
ENSG00000135519	98.6927	2.07694	0.19137	10.853	1.92898e-27	3.73612e-26	23416	1	23416	potassium channel, voltage gated eag related subfamily H, member 3	potassium channel, voltage gated eag related subfamily H, member 3	NM_001314030	NM_001314030,NM_012284,NP_001300959,NP_036416,XM_005268752,XM_006719313,XM_011538085,XM_011538086,XM_011538087,XM_011538088,XP_005268809,XP_006719376,XP_011536387,XP_011536388,XP_011536389,XP_011536390
ENSG00000187621	18.8994	2.07525	0.301127	6.89162	5.5162e-12	4.88318e-11	27004	1	27004	T-cell leukemia/lymphoma 6 (non-protein coding)	T-cell leukemia/lymphoma 6 (non-protein coding)	NM_012468	NM_012468,NM_014418,NM_020550,NM_020552,NM_020553,NM_020554,NR_028288
ENSG00000225439	251.503	2.07394	0.124431	16.6673	2.26596e-62	1.12323e-60	100507171	1	100507171	BOLA3 antisense RNA 1 (head to head)	BOLA3 antisense RNA 1 (head to head)	NR_045634	NR_045634,NR_045636,NR_045637
ENSG00000276547	19.2935	2.07217	0.298458	6.94291	3.84104e-12	3.44325e-11	56101	1	56101	protocadherin gamma subfamily B, 5	protocadherin gamma subfamily B, 5	NM_018925	NM_018925,NM_032099,NP_061748,NP_115270
ENSG00000182378	1315.92	2.06872	0.0593853	34.8356	7.02339e-266	4.69504e-263	55344	1	55344	phosphatidylinositol-specific phospholipase C, X domain containing 1	phosphatidylinositol-specific phospholipase C, X domain containing 1	NM_018390	NM_018390,NP_060860,NR_028057,XM_006724444,XM_006724445,XM_006724446,XM_006724865,XM_006724866,XM_006724867,XM_011545633,XM_011546180,XP_006724507,XP_006724508,XP_006724509,XP_006724928,XP_006724929,XP_006724930,XP_011543935,XP_011544482
ENSG00000169515	7.85837	2.06841	0.308792	6.69839	2.10725e-11	1.78571e-10	83987	1	83987	coiled-coil domain containing 8	coiled-coil domain containing 8	NM_032040	NM_032040,NP_114429
ENSG00000272046	34.1953	2.06817	0.275858	7.49722	6.51865e-14	6.66012e-13	NA	0	NA	NA	NA	NA	NA
ENSG00000149050	26.0563	2.06303	0.27907	7.3925	1.44094e-13	1.43952e-12	7761	1	7761	zinc finger protein 214	zinc finger protein 214	NM_013249	NM_013249,NP_037381,XM_005253128,XM_005253129,XM_006718308,XM_006718309,XM_011520355,XM_011520356,XM_011520357,XP_005253185,XP_005253186,XP_006718371,XP_006718372,XP_011518657,XP_011518658,XP_011518659
ENSG00000170162	40.818	2.06221	0.256921	8.02662	1.00191e-15	1.13464e-14	245806	1	245806	vestigial-like family member 2	vestigial-like family member 2	NM_153453	NM_153453,NM_182645,NP_703154,NP_872586,XM_005266883,XM_005266884,XP_005266940,XP_005266941
ENSG00000131203	20.4244	2.05865	0.284076	7.24683	4.26633e-13	4.10779e-12	3620	1	3620	indoleamine 2,3-dioxygenase 1	indoleamine 2,3-dioxygenase 1	NM_002164	NM_002164,NP_002155
ENSG00000214888	28.3791	2.05703	0.294994	6.97312	3.09985e-12	2.80787e-11	NA	0	NA	NA	NA	NA	NA
ENSG00000163618	96.5787	2.05144	0.21741	9.43583	3.87925e-21	5.79954e-20	8618	1	8618	Ca++-dependent secretion activator	Ca++-dependent secretion activator	NM_003716	NM_003716,NM_183393,NM_183394,NP_003707,NP_899630,NP_899631,XM_006713378,XM_011534171,XM_011534172,XM_011534173,XM_011534174,XM_011534175,XM_011534176,XM_011534177,XM_011534178,XM_011534179,XM_011534180,XM_011534181,XM_011534182,XM_011534183,XM_011534184,XM_011534185,XM_011534186,XM_011534187,XM_011534188,XM_011534189,XM_011534190,XM_011534191,XM_011534192,XM_011534193,XM_011534194,XM_011534195,X…
ENSG00000170689	465.77	2.04954	0.102157	20.0627	1.56311e-89	1.33475e-87	3219	1	3219	homeobox B9	homeobox B9	NM_024017	NM_024017,NP_076922,XM_011524728,XP_011523030
ENSG00000135740	38.3273	2.04259	0.256108	7.9755	1.5176e-15	1.6981e-14	6553	1	6553	solute carrier family 9, subfamily A (NHE5, cation proton antiporter 5), member 5	solute carrier family 9, subfamily A (NHE5, cation proton antiporter 5), member 5	NM_004594	NM_004594,NP_004585,XM_011523301,XM_011523302,XM_011523303,XM_011523304,XM_011523305,XP_011521603,XP_011521604,XP_011521605,XP_011521606,XP_011521607
ENSG00000111249	138.719	2.04178	0.169184	12.0684	1.55037e-33	3.72806e-32	23316	1	23316	cut-like homeobox 2	cut-like homeobox 2	NM_015267	NM_015267,NP_056082,XM_011538061,XM_011538062,XM_011538063,XM_011538064,XM_011538065,XM_011538066,XM_011538067,XM_011538068,XM_011538069,XM_011538070,XM_011538071,XM_011538072,XP_011536363,XP_011536364,XP_011536365,XP_011536366,XP_011536367,XP_011536368,XP_011536369,XP_011536370,XP_011536371,XP_011536372,XP_011536373,XP_011536374
ENSG00000134533	70.6187	2.04172	0.211702	9.6443	5.19664e-22	8.08415e-21	85004	1	85004	RAS-like, estrogen-regulated, growth inhibitor	RAS-like, estrogen-regulated, growth inhibitor	NM_001190726	NM_001190726,NM_032918,NP_001177655,NP_116307,XM_011520870,XP_011519172
ENSG00000151338	9.96461	2.03828	0.310311	6.56849	5.08268e-11	4.19321e-10	145282	1	145282	mirror-image polydactyly 1	mirror-image polydactyly 1	NM_001195296	NM_001195296,NM_001195297,NM_138731,NP_001182225,NP_001182226,NP_620059,XM_005267353,XM_011536457,XM_011536458,XM_011536459,XM_011536460,XM_011536461,XM_011536462,XM_011536463,XM_011536464,XM_011536465,XM_011536466,XM_011536467,XP_005267410,XP_011534759,XP_011534760,XP_011534761,XP_011534762,XP_011534763,XP_011534764,XP_011534765,XP_011534766,XP_011534767,XP_011534768,XP_011534769,XR_943391,XR_94…
ENSG00000080823	190.057	2.03344	0.128913	15.7737	4.71736e-56	2.04772e-54	5891	1	5891	MOK protein kinase	MOK protein kinase	NM_001272011	NM_001272011,NM_014226,NP_001258940,NP_055041,NR_073540,NR_073541,NR_073542,NR_073543,XM_006720225,XM_006720226,XM_011537052,XM_011537053,XP_006720288,XP_006720289,XP_011535354,XP_011535355,XR_429320,XR_429322,XR_429323,XR_943504
ENSG00000137727	26.8292	2.03263	0.277626	7.32147	2.45276e-13	2.40416e-12	57569	1	57569	Rho GTPase activating protein 20	Rho GTPase activating protein 20	NM_001258415	NM_001258415,NM_001258416,NM_001258417,NM_001258418,NM_020809,NP_001245344,NP_001245345,NP_001245346,NP_001245347,NP_065860,XM_005271628,XM_006718893,XP_005271685,XP_006718956
ENSG00000249803	12.6055	2.03236	0.308465	6.58863	4.43895e-11	3.6712e-10	NA	0	NA	NA	NA	NA	NA
ENSG00000100206	94.0901	2.03058	0.194733	10.4275	1.85674e-25	3.37022e-24	11144	1	11144	DNA meiotic recombinase 1	DNA meiotic recombinase 1	NM_001278208	NM_001278208,NM_007068,NP_001265137,NP_008999,NR_103474,XM_006724112,XM_011529834,XM_011529835,XM_011529836,XM_011529837,XM_011529838,XP_006724175,XP_011528136,XP_011528137,XP_011528138,XP_011528139,XP_011528140
ENSG00000169548	15.3728	2.02966	0.305094	6.65258	2.87999e-11	2.41517e-10	129025	1	129025	zinc finger protein 280A	zinc finger protein 280A	NM_080740	NM_080740,NP_542778
ENSG00000121316	7.12407	2.02779	0.305336	6.64119	3.11154e-11	2.60468e-10	79887	1	79887	phospholipase B domain containing 1	phospholipase B domain containing 1	NM_024829	NM_024829,NP_079105
ENSG00000168748	23.8326	2.02766	0.287018	7.06457	1.61114e-12	1.48467e-11	766	1	766	carbonic anhydrase VII	carbonic anhydrase VII	NM_001014435	NM_001014435,NM_005182,NP_001014435,NP_005173,XM_005256136,XM_011523311,XM_011523312,XP_005256193,XP_011521613,XP_011521614
ENSG00000235314	18.5279	2.02666	0.302395	6.70201	2.05569e-11	1.74264e-10	NA	0	NA	NA	NA	NA	NA
ENSG00000136010	12.6517	2.02488	0.307113	6.59325	4.30289e-11	3.56244e-10	160428	1	160428	aldehyde dehydrogenase 1 family, member L2	aldehyde dehydrogenase 1 family, member L2	NM_001034173	NM_001034173,NP_001029345,NR_027752,XM_011537986,XM_011537987,XM_011537988,XM_011537989,XP_011536288,XP_011536289,XP_011536290,XP_011536291
ENSG00000244649	19.9821	2.0201	0.298041	6.77791	1.21928e-11	1.05345e-10	NA	0	NA	NA	NA	NA	NA
ENSG00000233695	44.8373	2.00322	0.229915	8.71288	2.96246e-18	3.82732e-17	NA	0	NA	NA	NA	NA	NA
ENSG00000162849	47.7247	2.00218	0.243675	8.21661	2.09336e-16	2.44525e-15	55083	1	55083	kinesin family member 26B	kinesin family member 26B	NM_018012	NM_018012,NP_060482,XM_011544214,XM_011544215,XM_011544216,XM_011544217,XM_011544218,XP_011542516,XP_011542517,XP_011542518,XP_011542519,XP_011542520
ENSG00000076662	39.518	2.0018	0.254698	7.85948	3.85729e-15	4.22712e-14	3385	1	3385	intercellular adhesion molecule 3	intercellular adhesion molecule 3	NM_002162	NM_002162,NP_002153,XM_011527959,XM_011527960,XP_011526261,XP_011526262
ENSG00000170743	21.7659	1.9995	0.2999	6.66724	2.60667e-11	2.19699e-10	143425	1	143425	synaptotagmin IX	synaptotagmin IX	NM_175733	NM_175733,NP_783860,XM_005252795,XM_011519900,XM_011519901,XM_011519902,XM_011519903,XM_011519904,XM_011519905,XM_011519906,XM_011519907,XP_005252852,XP_011518202,XP_011518203,XP_011518204,XP_011518205,XP_011518206,XP_011518207,XP_011518208,XP_011518209
ENSG00000182218	13.422	1.99936	0.306645	6.5201	7.02609e-11	5.73785e-10	84439	1	84439	HHIP-like 1	HHIP-like 1	NM_001127258	NM_001127258,NM_032425,NP_001120730,NP_115801,XM_006720277,XM_011537236,XM_011537237,XP_006720340,XP_011535538,XP_011535539
ENSG00000248837	39.9463	1.99902	0.243164	8.22088	2.02016e-16	2.36565e-15	105374524	1	105374524	uncharacterized LOC105374524	uncharacterized LOC105374524	XR_925462	XR_925462,XR_925463,XR_925464,XR_925466,XR_925467,XR_925468,XR_925469,XR_925470,XR_925471,XR_944722,XR_944723,XR_944724,XR_944725,XR_944726,XR_944727,XR_944728,XR_944729,XR_944732
ENSG00000058453	443.377	1.99902	0.0943916	21.1779	1.52721e-99	1.56036e-97	9696	1	9696	ciliary rootlet coiled-coil, rootletin	ciliary rootlet coiled-coil, rootletin	NM_014675	NM_014675,NP_055490,XM_006711058,XM_011542468,XM_011542469,XM_011542470,XM_011542471,XM_011542472,XP_006711121,XP_011540770,XP_011540771,XP_011540772,XP_011540773,XP_011540774
ENSG00000075886	7.63822	1.99597	0.308509	6.46971	9.8192e-11	7.93575e-10	113457	1	113457	tubulin, alpha 3d	tubulin, alpha 3d	NM_080386	NM_080386,NP_525125
ENSG00000139915	18.6177	1.9951	0.294693	6.7701	1.2869e-11	1.10982e-10	161357	1	161357	MAM domain containing glycosylphosphatidylinositol anchor 2	MAM domain containing glycosylphosphatidylinositol anchor 2	NM_001113498	NM_001113498,NM_182830,NP_001106970,NP_878250,NR_103766,XM_011536519,XM_011536520,XM_011536521,XM_011536522,XM_011536523,XM_011536524,XM_011536525,XP_011534821,XP_011534822,XP_011534823,XP_011534824,XP_011534825,XP_011534826,XP_011534827
ENSG00000213366	88.0729	1.99482	0.190207	10.4876	9.84763e-26	1.80852e-24	2946	1	2946	glutathione S-transferase mu 2 (muscle)	glutathione S-transferase mu 2 (muscle)	NM_000848	NM_000848,NM_001142368,NP_000839,NP_001135840
ENSG00000269964	27.4414	1.98887	0.285304	6.97107	3.1454e-12	2.84803e-11	101928601	1	101928601	meiotic double-stranded break formation protein 4	meiotic double-stranded break formation protein 4	NM_001282136	NM_001282136,NP_001269065,XM_005248773,XM_005248774,XM_006715298,XP_005248830,XP_005248831,XP_006715361
ENSG00000112796	30.8517	1.98808	0.28052	7.08714	1.36907e-12	1.2681e-11	59084	1	59084	ectonucleotide pyrophosphatase/phosphodiesterase 5 (putative)	ectonucleotide pyrophosphatase/phosphodiesterase 5 (putative)	NM_001290072	NM_001290072,NM_001290073,NM_021572,NP_001277001,NP_001277002,NP_067547,XM_005249260,XM_011514786,XP_005249317,XP_011513088
ENSG00000124440	11.4028	1.98671	0.309259	6.42411	1.3264e-10	1.06062e-09	64344	1	64344	hypoxia inducible factor 3, alpha subunit	hypoxia inducible factor 3, alpha subunit	NM_022462	NM_022462,NM_152794,NM_152795,NM_152796,NP_071907,NP_690007,NP_690008,NP_690009,XM_005259152,XM_005259153,XM_005259154,XM_005259155,XM_005259156,XM_006723325,XP_005259209,XP_005259210,XP_005259211,XP_005259212,XP_005259213,XP_006723388,XR_935849
ENSG00000052850	523.975	1.98652	0.0888225	22.365	8.62461e-111	1.05649e-108	60529	1	60529	ALX homeobox 4	ALX homeobox 4	NM_021926	NM_021926,NP_068745,XM_011520264,XM_011520265,XM_011520266,XP_011518566,XP_011518567,XP_011518568
ENSG00000198353	74.5102	1.98507	0.206161	9.62875	6.04628e-22	9.35614e-21	3221	1	3221	homeobox C4	homeobox C4	NM_014620	NM_014620,NM_153633,NP_055435,NP_705897
ENSG00000183091	91.5333	1.98242	0.194462	10.1944	2.10105e-24	3.66034e-23	4703	1	4703	nebulin	nebulin	NM_001164507	NM_001164507,NM_001164508,NM_001271208,NM_004543,NP_001157979,NP_001157980,NP_001258137,NP_004534,XM_005246590,XM_005246591,XM_005246592,XM_005246593,XM_005246594,XM_005246595,XM_005246596,XM_005246597,XM_005246598,XM_005246599,XM_005246600,XM_005246601,XM_005246602,XM_005246603,XM_005246604,XM_005246606,XM_005246608,XM_005246610,XM_005246611,XM_005246612,XM_005246613,XM_005246615,XM_005246616,XM…
ENSG00000217950	35.6126	1.97755	0.269345	7.3421	2.10273e-13	2.06799e-12	NA	0	NA	NA	NA	NA	NA
ENSG00000224778	27.5641	1.97671	0.295439	6.69078	2.21988e-11	1.87775e-10	NA	0	NA	NA	NA	NA	NA
ENSG00000103647	69.7781	1.97401	0.217494	9.07615	1.12487e-19	1.56658e-18	10391	1	10391	coronin, actin binding protein, 2B	coronin, actin binding protein, 2B	NM_001190456	NM_001190456,NM_001190457,NM_006091,NP_001177385,NP_001177386,NP_006082,XM_005254124,XM_005254125,XM_011521159,XP_005254181,XP_005254182,XP_011519461
ENSG00000163958	15.7077	1.974	0.305754	6.45619	1.07372e-10	8.65673e-10	131540	1	131540	zinc finger, DHHC-type containing 19	zinc finger, DHHC-type containing 19	NM_001039617	NM_001039617,NM_144637,NP_001034706,XM_005269277,XM_005269278,XM_005269279,XM_006713493,XM_006713494,XM_011512414,XM_011512415,XM_011512416,XM_011512417,XM_011512418,XP_005269334,XP_005269335,XP_005269336,XP_006713556,XP_006713557,XP_011510716,XP_011510717,XP_011510718,XP_011510719,XP_011510720,XR_246038,XR_924098,XR_924099,XR_924100
ENSG00000123360	77.4757	1.97309	0.199871	9.8718	5.51658e-23	8.96329e-22	5153	1	5153	phosphodiesterase 1B, calmodulin-dependent	phosphodiesterase 1B, calmodulin-dependent	NM_000924	NM_000924,NM_001165975,NM_001288768,NM_001288769,NP_000915,NP_001159447,NP_001275697,NP_001275698,XM_006719451,XM_011538456,XP_006719514,XP_011536758
ENSG00000240108	21.3883	1.97084	0.301049	6.54658	5.88712e-11	4.82794e-10	149934	1	149934	nuclear receptor corepressor 1 pseudogene 1	nuclear receptor corepressor 1 pseudogene 1	NM_001039379	NM_001039379,NR_003678
ENSG00000225548	26.5276	1.96946	0.294028	6.69823	2.10964e-11	1.78647e-10	NA	0	NA	NA	NA	NA	NA
ENSG00000275832	48.6875	1.96884	0.237797	8.2795	1.23697e-16	1.46985e-15	57636	1	57636	Rho GTPase activating protein 23	Rho GTPase activating protein 23	NM_001199417	NM_001199417,NM_020876,NP_001186346,XM_006721991,XM_006721992,XM_006721993,XM_006721994,XM_006725330,XM_006725331,XM_006725332,XM_006725333,XM_011525073,XM_011525074,XM_011525075,XM_011525076,XM_011525077,XM_011546814,XM_011546815,XM_011546816,XM_011546817,XM_011546818,XP_006722054,XP_006722055,XP_006722056,XP_006722057,XP_006725393,XP_006725394,XP_006725395,XP_006725396,XP_011523375,XP_011523376…
ENSG00000182583	29.1996	1.96417	0.296014	6.63541	3.23612e-11	2.70509e-10	26609	1	26609	variable charge, X-linked	variable charge, X-linked	NM_013452	NM_013452,NP_038480,XM_011545490,XP_011543792
ENSG00000125816	194.718	1.9609	0.132565	14.792	1.64985e-49	6.18614e-48	644524	1	644524	NK2 homeobox 4	NK2 homeobox 4	NM_033176	NM_033176,NP_149416
ENSG00000095637	110.931	1.9608	0.176748	11.0937	1.34561e-28	2.70707e-27	10580	1	10580	sorbin and SH3 domain containing 1	sorbin and SH3 domain containing 1	NM_001034954	NM_001034954,NM_001034955,NM_001034956,NM_001034957,NM_001290294,NM_001290295,NM_001290296,NM_001290297,NM_001290298,NM_006434,NM_015385,NM_024991,NP_001030126,NP_001030127,NP_001030128,NP_001030129,NP_001277223,NP_001277224,NP_001277225,NP_001277226,NP_001277227,NP_006425,NP_056200,NP_079267,XM_006717570,XM_006717574,XM_006717581,XM_006717582,XM_006717585,XM_006717586,XM_006717589,XM_006717590,X…
ENSG00000229970	34.9805	1.95902	0.268287	7.30196	2.83609e-13	2.77176e-12	NA	0	NA	NA	NA	NA	NA
ENSG00000166126	12.6303	1.95773	0.306447	6.38849	1.67536e-10	1.32499e-09	81693	1	81693	amnion associated transmembrane protein	amnion associated transmembrane protein	NM_030943	NM_030943,NP_112205,XM_011537202,XM_011537203,XP_011535504,XP_011535505
ENSG00000258590	30.2558	1.95572	0.290412	6.73428	1.64748e-11	1.40782e-10	NA	0	NA	NA	NA	NA	NA
ENSG00000022556	54.7361	1.95471	0.214106	9.12966	6.87164e-20	9.66782e-19	55655	1	55655	NLR family, pyrin domain containing 2	NLR family, pyrin domain containing 2	NM_001174081	NM_001174081,NM_001174082,NM_001174083,NM_017852,NP_001167552,NP_001167553,NP_001167554,NP_060322
ENSG00000270823	21.1177	1.95457	0.302756	6.45593	1.07554e-10	8.66546e-10	NA	0	NA	NA	NA	NA	NA
ENSG00000116983	116.414	1.94888	0.174286	11.1821	4.98969e-29	1.02049e-27	51440	1	51440	hippocalcin like 4	hippocalcin like 4	NM_001282396	NM_001282396,NM_001282397,NM_016257,NP_001269325,NP_001269326,NP_057341
ENSG00000263155	9.99561	1.94729	0.310098	6.27961	3.39416e-10	2.62263e-09	100820829	1	100820829	myocardial zonula adherens protein	myocardial zonula adherens protein	NM_001018100	NM_001018100,NM_152451,NP_001018110,NP_689664
ENSG00000105996	59.5659	1.94551	0.235644	8.25614	1.5046e-16	1.78334e-15	3199	1	3199	homeobox A2	homeobox A2	NM_006735	NM_006735,NP_006726
ENSG00000117266	168.333	1.94396	0.144401	13.4623	2.60767e-41	7.87247e-40	5129	1	5129	cyclin-dependent kinase 18	cyclin-dependent kinase 18	NM_002596	NM_002596,NM_212502,NM_212503,NP_002587,NP_997667,NP_997668,XM_011509602,XP_011507904,XR_426779,XR_426780,XR_426781,XR_426782,XR_426784,XR_921822
ENSG00000197935	21.8552	1.93824	0.300819	6.44322	1.16966e-10	9.39786e-10	282890	1	282890	zinc finger protein 311	zinc finger protein 311	NM_001010877	NM_001010877,NP_001010877,XM_005249019,XM_005272794,XM_005274940,XM_005275094,XM_005275370,XM_005275530,XM_006715067,XM_006715070,XM_006725034,XM_006725035,XM_006725038,XM_006725479,XM_006725482,XM_006725693,XM_006725696,XM_006725811,XM_006725814,XM_006725992,XM_006725995,XM_006726082,XM_006726085,XM_011514510,XM_011514511,XM_011514512,XM_011514513,XM_011514514,XM_011514515,XM_011514516,XM_011514…
ENSG00000231431	20.593	1.9327	0.290406	6.65516	2.82988e-11	2.37399e-10	440910	1	440910	uncharacterized LOC440910	uncharacterized LOC440910	NR_030728	NR_030728
ENSG00000186235	18.2849	1.92682	0.301742	6.38564	1.70678e-10	1.34865e-09	151174	1	151174	uncharacterized LOC151174	uncharacterized LOC151174	NR_026925	NR_026925,NR_026926
ENSG00000170561	416.158	1.92173	0.104258	18.4325	7.20756e-76	4.90219e-74	153572	1	153572	iroquois homeobox 2	iroquois homeobox 2	NM_001134222	NM_001134222,NM_033267,NP_001127694,NP_150366,XM_011513978,XM_011513979,XP_011512280,XP_011512281
ENSG00000270038	14.7618	1.92117	0.303458	6.33092	2.43706e-10	1.9032e-09	NA	0	NA	NA	NA	NA	NA
ENSG00000249896	18.463	1.91945	0.303694	6.32035	2.60976e-10	2.03332e-09	NA	0	NA	NA	NA	NA	NA
ENSG00000247498	17.7543	1.91878	0.304113	6.30943	2.80069e-10	2.177e-09	100506314	1	100506314	uncharacterized LOC100506314	uncharacterized LOC100506314	NR_038920	NR_038920
ENSG00000268357	13.7502	1.91431	0.307599	6.2234	4.86499e-10	3.70287e-09	NA	0	NA	NA	NA	NA	NA
ENSG00000249196	8.85198	1.91339	0.309907	6.17408	6.6551e-10	5.01157e-09	283352	1	283352	uncharacterized LOC283352	uncharacterized LOC283352	NR_104172	NR_104172,NR_104173
ENSG00000140859	138.78	1.9085	0.156821	12.1699	4.49758e-34	1.10188e-32	3801	1	3801	kinesin family member C3	kinesin family member C3	NM_001130099	NM_001130099,NM_001130100,NM_005550,NP_001123571,NP_001123572,NP_005541,XM_005255937,XM_005255944,XM_006721188,XM_011523070,XM_011523071,XM_011523072,XM_011523073,XM_011523074,XM_011523075,XM_011523076,XM_011523077,XM_011523078,XM_011523079,XM_011523080,XP_005255994,XP_005256001,XP_006721251,XP_011521372,XP_011521373,XP_011521374,XP_011521375,XP_011521376,XP_011521377,XP_011521378,XP_011521379,XP…
ENSG00000072952	17.3228	1.90738	0.304975	6.25421	3.99541e-10	3.06997e-09	10335	1	10335	murine retrovirus integration site 1 homolog	murine retrovirus integration site 1 homolog	NM_001098579	NM_001098579,NM_001100163,NM_001100167,NM_001206880,NM_001206881,NM_130385,NP_001092049,NP_001093633,NP_001093637,NP_001193809,NP_001193810,NP_569056
ENSG00000215612	27.2338	1.90694	0.290155	6.57212	4.96043e-11	4.09525e-10	3166	1	3166	H6 family homeobox 1	H6 family homeobox 1	NM_001306142	NM_001306142,NM_018942,NP_001293071,NP_061815,XM_005248160,XP_005248217,XR_925325,XR_925326
ENSG00000133110	15.7967	1.90636	0.299591	6.36321	1.97575e-10	1.5528e-09	10631	1	10631	periostin, osteoblast specific factor	periostin, osteoblast specific factor	NM_001135934	NM_001135934,NM_001135935,NM_001135936,NM_001286665,NM_001286666,NM_001286667,NM_006475,NP_001129406,NP_001129407,NP_001129408,NP_001273594,NP_001273595,NP_001273596,NP_006466,XM_005266231,XM_005266232,XP_005266288,XP_005266289
ENSG00000165474	153.84	1.90629	0.157422	12.1094	9.41375e-34	2.28006e-32	2706	1	2706	gap junction protein, beta 2, 26kDa	gap junction protein, beta 2, 26kDa	NM_004004	NM_004004,NP_003995,XM_011535049,XP_011533351
ENSG00000143340	49.9259	1.9041	0.24462	7.78394	7.03026e-15	7.59404e-14	148753	1	148753	family with sequence similarity 163, member A	family with sequence similarity 163, member A	NM_173509	NM_173509,NP_775780,XM_005244913,XM_006711174,XM_006711175,XM_006711176,XM_006711177,XM_011509216,XM_011509217,XM_011509218,XM_011509219,XM_011509220,XM_011509221,XM_011509222,XM_011509223,XM_011509224,XM_011509225,XM_011509226,XM_011509227,XM_011509228,XP_005244970,XP_006711237,XP_006711238,XP_006711239,XP_006711240,XP_011507518,XP_011507519,XP_011507520,XP_011507521,XP_011507522,XP_011507523,XP…
ENSG00000198300	118.694	1.90356	0.275845	6.90083	5.16981e-12	4.58522e-11	5178	1	5178	paternally expressed 3	paternally expressed 3	NM_001146184	NM_001146184,NM_001146185,NM_001146186,NM_001146187,NM_006210,NP_001139656,NP_001139657,NP_001139658,NP_001139659,NP_006201
ENSG00000177138	15.8983	1.89981	0.305348	6.22179	4.91507e-10	3.73733e-09	171483	1	171483	family with sequence similarity 9, member B	family with sequence similarity 9, member B	NM_173696	NM_173696,NM_205849,NP_995321,XM_011545464,XM_011545465,XP_011543766,XP_011543767
ENSG00000260896	13.0715	1.89957	0.306399	6.19968	5.65765e-10	4.28111e-09	100996425	1	100996425	prostate cancer-associated 47	prostate cancer-associated 47	NR_131947	NR_131947,NR_131948,XR_158902,XR_172173,XR_917503,XR_933782
ENSG00000166257	37.6219	1.89859	0.249689	7.60381	2.87535e-14	2.98998e-13	55800	1	55800	sodium channel, voltage gated, type III beta subunit	sodium channel, voltage gated, type III beta subunit	NM_001040151	NM_001040151,NM_018400,NP_001035241,NP_060870,XM_011542897,XP_011541199,XR_947858
ENSG00000135929	18.3845	1.8978	0.294487	6.44443	1.16035e-10	9.32629e-10	1593	1	1593	cytochrome P450, family 27, subfamily A, polypeptide 1	cytochrome P450, family 27, subfamily A, polypeptide 1	NM_000784	NM_000784,NP_000775
ENSG00000075399	78.4962	1.89178	0.194443	9.72923	2.26305e-22	3.57278e-21	9605	1	9605	VPS9 domain containing 1	VPS9 domain containing 1	NM_004913	NM_004913,NP_004904,XM_005256329,XM_005256330,XM_005256331,XM_006721350,XM_011523476,XM_011523477,XM_011523478,XM_011523479,XM_011523480,XM_011523481,XP_005256386,XP_005256387,XP_005256388,XP_006721413,XP_011521778,XP_011521779,XP_011521780,XP_011521781,XP_011521782,XP_011521783,XR_933495
ENSG00000075643	210.995	1.89106	0.133225	14.1945	9.90456e-46	3.29172e-44	55034	1	55034	molybdenum cofactor sulfurase	molybdenum cofactor sulfurase	NM_017947	NM_017947,NP_060417
ENSG00000233515	16.2655	1.88983	0.307172	6.15236	7.63397e-10	5.71741e-09	NA	0	NA	NA	NA	NA	NA
ENSG00000138028	80.2273	1.88632	0.194901	9.67838	3.72576e-22	5.82698e-21	10669	1	10669	cell growth regulator with EF-hand domain 1	cell growth regulator with EF-hand domain 1	NM_001166239	NM_001166239,NM_001166240,NM_001166241,NM_001301324,NM_006569,NP_001159711,NP_001159712,NP_001288253,NP_006560
ENSG00000105997	150.579	1.8848	0.153855	12.2505	1.67028e-34	4.17964e-33	3200	1	3200	homeobox A3	homeobox A3	NM_030661	NM_030661,NM_153631,NM_153632,NP_109377,NP_705895,XM_005249730,XM_005249731,XM_005249732,XM_006715715,XM_011515343,XP_005249787,XP_005249788,XP_005249789,XP_006715778,XP_011513645
ENSG00000113231	45.6652	1.88355	0.254437	7.40282	1.33324e-13	1.33478e-12	8622	1	8622	phosphodiesterase 8B	phosphodiesterase 8B	NM_001029851	NM_001029851,NM_001029852,NM_001029853,NM_001029854,NM_003719,NP_001025022,NP_001025023,NP_001025024,NP_001025025,NP_003710,XM_005248621,XM_005248623,XM_005248624,XM_006714725,XM_006714726,XM_011543699,XM_011543700,XM_011543701,XM_011543702,XM_011543703,XM_011543704,XP_005248678,XP_005248680,XP_005248681,XP_006714788,XP_006714789,XP_011542001,XP_011542002,XP_011542003,XP_011542004,XP_011542005,XP…
ENSG00000162755	12.7488	1.88163	0.308067	6.10785	1.0098e-09	7.48612e-09	126823	1	126823	kelch domain containing 9	kelch domain containing 9	NM_001007255	NM_001007255,NM_001007256,NM_152366,NP_001007256,NP_689579,NR_033385,NR_033386
ENSG00000120708	11.9351	1.88137	0.308749	6.09353	1.10451e-09	8.15469e-09	7045	1	7045	transforming growth factor, beta-induced, 68kDa	transforming growth factor, beta-induced, 68kDa	NM_000358	NM_000358,NP_000349
ENSG00000165959	150.397	1.88077	0.151527	12.4121	2.24792e-35	5.78599e-34	79789	1	79789	calmin (calponin-like, transmembrane)	calmin (calponin-like, transmembrane)	NM_024734	NM_024734,NP_079010,XM_011537158,XM_011537159,XP_011535460,XP_011535461,XR_245721,XR_429330,XR_429332
ENSG00000158089	345.508	1.87881	0.111092	16.9122	3.65715e-64	1.87235e-62	79623	1	79623	polypeptide N-acetylgalactosaminyltransferase 14	polypeptide N-acetylgalactosaminyltransferase 14	NM_001253826	NM_001253826,NM_001253827,NM_024572,NP_001240755,NP_001240756,NP_078848,NR_045602,XM_011533104,XM_011533105,XM_011533106,XP_011531406,XP_011531407,XP_011531408
ENSG00000197322	10.2669	1.87495	0.310006	6.04813	1.46541e-09	1.07178e-08	NA	0	NA	NA	NA	NA	NA
ENSG00000186838	22.0944	1.87409	0.286951	6.53107	6.53013e-11	5.34402e-10	348303	1	348303	selenoprotein V	selenoprotein V	NM_182704	NM_182704,NP_874363
ENSG00000102678	40.5402	1.87294	0.262337	7.13945	9.37037e-13	8.80476e-12	2254	1	2254	fibroblast growth factor 9	fibroblast growth factor 9	NM_002010	NM_002010,NP_002001,XM_011534996,XP_011533298
ENSG00000124615	265.756	1.87262	0.118861	15.7546	6.38217e-56	2.75505e-54	4337	1	4337	molybdenum cofactor synthesis 1	molybdenum cofactor synthesis 1	NM_001075098	NM_001075098,NM_005942,NM_005943,NM_138928,NP_001068566,NP_005934,NR_033233,XM_011514632,XM_011514633,XM_011514634,XM_011514635,XP_011512934,XP_011512935,XP_011512936,XP_011512937,XR_926225
ENSG00000178386	13.3435	1.87221	0.308473	6.06929	1.28479e-09	9.43216e-09	7766	1	7766	zinc finger protein 223	zinc finger protein 223	NM_013361	NM_013361,NP_037493
ENSG00000116016	46.0828	1.87141	0.247802	7.55202	4.28545e-14	4.42093e-13	2034	1	2034	endothelial PAS domain protein 1	endothelial PAS domain protein 1	NM_001430	NM_001430,NP_001421,XM_011532698,XP_011531000
ENSG00000198892	17.1006	1.87071	0.299438	6.2474	4.17332e-10	3.20247e-09	149345	1	149345	shisa family member 4	shisa family member 4	NM_198149	NM_198149,NP_937792,NR_030775,XM_006711184,XP_006711247
ENSG00000255624	16.4205	1.86922	0.305269	6.1232	9.1717e-10	6.82105e-09	NA	0	NA	NA	NA	NA	NA
ENSG00000227036	18.1981	1.86915	0.297529	6.28225	3.33715e-10	2.58028e-09	400619	1	400619	long intergenic non-protein coding RNA 511	long intergenic non-protein coding RNA 511	NR_033876	NR_033876
ENSG00000265417	19.4016	1.86848	0.302565	6.17548	6.59607e-10	4.96871e-09	NA	0	NA	NA	NA	NA	NA
ENSG00000249641	21.266	1.86598	0.294355	6.33922	2.30928e-10	1.80462e-09	100874366	1	100874366	HOXC13 antisense RNA	HOXC13 antisense RNA	NR_047507	NR_047507
ENSG00000184363	7.8827	1.86396	0.309658	6.01943	1.75037e-09	1.27248e-08	11187	1	11187	plakophilin 3	plakophilin 3	NM_001303029	NM_001303029,NM_007183,NP_001289958,NP_009114
ENSG00000268912	19.0684	1.86255	0.2993	6.22303	4.87646e-10	3.70918e-09	NA	0	NA	NA	NA	NA	NA
ENSG00000176658	362.72	1.8596	0.10527	17.665	7.79587e-70	4.58291e-68	4642	1	4642	myosin ID	myosin ID	NM_001303279	NM_001303279,NM_001303280,NM_015194,NP_001290208,NP_001290209,NP_056009,XR_934470
ENSG00000182759	65.6734	1.85958	0.216819	8.57666	9.76707e-18	1.2286e-16	389692	1	389692	v-maf avian musculoaponeurotic fibrosarcoma oncogene homolog A	v-maf avian musculoaponeurotic fibrosarcoma oncogene homolog A	NM_201589	NM_201589,NP_963883
ENSG00000123612	91.6545	1.8588	0.191493	9.70689	2.81794e-22	4.42492e-21	130399	1	130399	activin A receptor, type IC	activin A receptor, type IC	NM_001111031	NM_001111031,NM_001111032,NM_001111033,NM_145259,NP_001104501,NP_001104502,NP_001104503,NP_660302
ENSG00000101017	36.6425	1.85743	0.261265	7.10936	1.16585e-12	1.08545e-11	958	1	958	CD40 molecule, TNF receptor superfamily member 5	CD40 molecule, TNF receptor superfamily member 5	NM_001250	NM_001250,NM_001302753,NM_152854,NP_001241,NP_001289682,NP_690593,NR_126502,XM_005260617,XM_005260619,XM_011529109,XP_005260674,XP_005260676,XP_011527411,XR_936660
ENSG00000182109	37.0289	1.85361	0.26317	7.04339	1.87618e-12	1.72551e-11	NA	0	NA	NA	NA	NA	NA
ENSG00000241721	16.0224	1.85208	0.305676	6.05895	1.3701e-09	1.00427e-08	NA	0	NA	NA	NA	NA	NA
ENSG00000085117	88.1835	1.84915	0.195926	9.43801	3.79918e-21	5.6871e-20	3732	1	3732	CD82 molecule	CD82 molecule	NM_001024844	NM_001024844,NM_002231,NP_001020015,NP_002222,XM_006718222,XM_006718223,XM_011520067,XP_006718285,XP_006718286,XP_011518369
ENSG00000111424	126.65	1.84871	0.161299	11.4614	2.06243e-30	4.42298e-29	7421	1	7421	vitamin D (1,25- dihydroxyvitamin D3) receptor	vitamin D (1,25- dihydroxyvitamin D3) receptor	NM_000376	NM_000376,NM_001017535,NM_001017536,NP_000367,NP_001017535,NP_001017536,XM_006719587,XM_011538720,XP_006719650,XP_011537022
ENSG00000128408	16.6115	1.84723	0.305509	6.04641	1.48108e-09	1.08256e-08	26150	1	26150	RIB43A domain with coiled-coils 2	RIB43A domain with coiled-coils 2	NM_015653	NM_015653,NP_056468,XM_005261524,XM_011530126,XP_005261581,XP_011528428
ENSG00000270277	15.9449	1.84621	0.30312	6.09068	1.12433e-09	8.29056e-09	NA	0	NA	NA	NA	NA	NA
ENSG00000132321	25.9407	1.84387	0.297344	6.20112	5.60626e-10	4.24635e-09	79781	1	79781	IQ motif containing with AAA domain 1	IQ motif containing with AAA domain 1	NM_001270584	NM_001270584,NM_001270585,NM_024726,NP_001257513,NP_001257514,NP_079002,NR_073043,XM_011511864,XM_011511865,XM_011511866,XP_011510166,XP_011510167,XP_011510168
ENSG00000006611	14.9566	1.84292	0.304778	6.04677	1.47779e-09	1.08049e-08	10083	1	10083	Usher syndrome 1C	Usher syndrome 1C	NM_001297764	NM_001297764,NM_005709,NM_153676,NP_001284693,NP_005700,NP_710142,NR_123738,XM_011519831,XM_011519832,XM_011519833,XM_011519834,XP_011518133,XP_011518134,XP_011518135,XP_011518136,XR_930841,XR_930842
ENSG00000005884	145.49	1.84242	0.15752	11.6964	1.32921e-31	2.99034e-30	3675	1	3675	integrin, alpha 3 (antigen CD49C, alpha 3 subunit of VLA-3 receptor)	integrin, alpha 3 (antigen CD49C, alpha 3 subunit of VLA-3 receptor)	NM_002204	NM_002204,NM_005501,NP_002195,NP_005492,XM_005257308,XP_005257365
ENSG00000186777	79.968	1.84217	0.276931	6.6521	2.88935e-11	2.42215e-10	654254	1	654254	zinc finger protein 732	zinc finger protein 732	NM_001137608	NM_001137608,NP_001131080
ENSG00000233836	9.44205	1.84115	0.310275	5.93393	2.95766e-09	2.10784e-08	NA	0	NA	NA	NA	NA	NA
ENSG00000160190	81.7975	1.8409	0.20169	9.12737	7.01821e-20	9.85624e-19	54020	1	54020	solute carrier family 37 (glucose-6-phosphate transporter), member 1	solute carrier family 37 (glucose-6-phosphate transporter), member 1	NM_018964	NM_018964,NP_061837,XM_005261141,XM_011529614,XM_011529615,XP_005261198,XP_011527916,XP_011527917
ENSG00000228554	10.3983	1.83967	0.310035	5.93375	2.96099e-09	2.10859e-08	NA	0	NA	NA	NA	NA	NA
ENSG00000001617	169.847	1.83894	0.141053	13.0372	7.51469e-39	2.12088e-37	6405	1	6405	sema domain, immunoglobulin domain (Ig), short basic domain, secreted, (semaphorin) 3F	sema domain, immunoglobulin domain (Ig), short basic domain, secreted, (semaphorin) 3F	NM_004186	NM_004186,NP_004177,XM_005265381,XM_005265382,XM_006713289,XM_006713290,XM_011533998,XM_011533999,XM_011534000,XP_005265438,XP_005265439,XP_006713352,XP_006713353,XP_011532300,XP_011532301,XP_011532302,XR_940487
ENSG00000248538	9.075	1.8357	0.310299	5.9159	3.30066e-09	2.3423e-08	101929128	1	101929128	uncharacterized LOC101929128	uncharacterized LOC101929128	NR_125431	NR_125431
ENSG00000164938	67.2397	1.8343	0.2799	6.55339	5.62439e-11	4.62057e-10	94241	1	94241	tumor protein p53 inducible nuclear protein 1	tumor protein p53 inducible nuclear protein 1	NM_001135733	NM_001135733,NM_033285,NP_001129205,NP_150601,XM_011517386,XP_011515688
ENSG00000043143	1059.8	1.8342	0.0690163	26.5764	1.27385e-155	3.01054e-153	23338	1	23338	jade family PHD finger 2	jade family PHD finger 2	NM_001289984	NM_001289984,NM_001289985,NM_001308143,NM_015288,NP_001276913,NP_001276914,NP_001295072,NP_056103,XM_005271945,XM_005271946,XM_005271947,XM_005271948,XM_011543291,XM_011543292,XM_011543293,XM_011543294,XP_005272002,XP_005272003,XP_005272004,XP_005272005,XP_011541593,XP_011541594,XP_011541595,XP_011541596
ENSG00000180818	899.653	1.83315	0.073347	24.9929	7.31144e-138	1.33645e-135	3226	1	3226	homeobox C10	homeobox C10	NM_017409	NM_017409,NP_059105
ENSG00000105270	30.4603	1.83176	0.266535	6.87251	6.30834e-12	5.55499e-11	25999	1	25999	CAP-GLY domain containing linker protein 3	CAP-GLY domain containing linker protein 3	NM_001199570	NM_001199570,NM_015526,NP_001186499,NP_056341
ENSG00000111344	32.9294	1.83083	0.252177	7.2601	3.86805e-13	3.7397e-12	8437	1	8437	RAS protein activator like 1 (GAP1 like)	RAS protein activator like 1 (GAP1 like)	NM_001193520	NM_001193520,NM_001193521,NM_001301202,NM_004658,NP_001180449,NP_001180450,NP_001288131,NP_004649,XM_005253950,XM_006719641,XM_006719642,XM_011538852,XM_011538853,XM_011538854,XP_005254007,XP_006719704,XP_006719705,XP_011537154,XP_011537155,XP_011537156,XR_944781,XR_944782
ENSG00000148053	10.0574	1.82729	0.310421	5.88648	3.94511e-09	2.77605e-08	4915	1	4915	neurotrophic tyrosine kinase, receptor, type 2	neurotrophic tyrosine kinase, receptor, type 2	NM_001007097	NM_001007097,NM_001018064,NM_001018065,NM_001018066,NM_001291937,NM_006180,NP_001007098,NP_001018074,NP_001018075,NP_001018076,NP_001278866,NP_006171,XM_005252001,XM_005252003,XM_005252004,XM_005252006,XM_005252007,XM_011518718,XM_011518719,XM_011518720,XP_005252058,XP_005252060,XP_005252061,XP_005252063,XP_005252064,XP_011517020,XP_011517021,XP_011517022
ENSG00000103852	248.156	1.82593	0.126339	14.4526	2.4141e-47	8.44285e-46	64927	1	64927	tetratricopeptide repeat domain 23	tetratricopeptide repeat domain 23	NM_001040655	NM_001040655,NM_001040656,NM_001040657,NM_001040658,NM_001040659,NM_001040660,NM_001288615,NM_001288616,NM_022905,NP_001275544,NP_001275545,NR_109947,XM_006720649,XM_011521927,XM_011521928,XM_011521929,XM_011521930,XM_011521931,XM_011521932,XM_011521933,XM_011521934,XM_011521935,XM_011521936,XM_011521937,XM_011521938,XM_011521939,XM_011521940,XM_011521941,XM_011521942,XM_011521943,XM_011521944,XM…
ENSG00000145832	102.456	1.82574	0.182132	10.0243	1.19238e-23	1.997e-22	153328	1	153328	solute carrier family 25, member 48	solute carrier family 25, member 48	NM_145282	NM_145282,NP_660325,XM_005271903,XM_006714544,XM_006714546,XM_006714549,XM_006714550,XM_006714552,XM_011543187,XM_011543188,XM_011543189,XM_011543190,XM_011543191,XM_011543192,XM_011543193,XM_011543194,XM_011543195,XM_011543196,XM_011543197,XM_011543198,XM_011543199,XM_011543200,XP_005271960,XP_006714607,XP_006714609,XP_006714612,XP_006714613,XP_006714615,XP_011541489,XP_011541490,XP_011541491,XP…
ENSG00000226674	9.98804	1.8255	0.310031	5.88812	3.90618e-09	2.75114e-08	401014	1	401014	testis expressed 41 (non-protein coding)	testis expressed 41 (non-protein coding)	NR_033870	NR_033870
ENSG00000140945	11.292	1.82384	0.309571	5.89152	3.82669e-09	2.70003e-08	1012	1	1012	cadherin 13	cadherin 13	NM_001220488	NM_001220488,NM_001220489,NM_001220490,NM_001220491,NM_001220492,NM_001257,NP_001207417,NP_001207418,NP_001207419,NP_001207420,NP_001207421,NP_001248,XM_011522804,XM_011522805,XP_011521106,XP_011521107
ENSG00000280356	7.3923	1.82347	0.308464	5.91146	3.39079e-09	2.40262e-08	NA	0	NA	NA	NA	NA	NA
ENSG00000119938	39.7183	1.82274	0.249204	7.31426	2.58801e-13	2.53566e-12	5507	1	5507	protein phosphatase 1, regulatory subunit 3C	protein phosphatase 1, regulatory subunit 3C	NM_005398	NM_005398,NP_005389
ENSG00000179627	133.704	1.82263	0.158261	11.5166	1.08838e-30	2.36442e-29	100128927	1	100128927	zinc finger and BTB domain containing 42	zinc finger and BTB domain containing 42	NM_001137601	NM_001137601,NP_001131073
ENSG00000138161	15.8777	1.82117	0.306378	5.94421	2.77798e-09	1.98523e-08	50624	1	50624	CUB and zona pellucida-like domains 1	CUB and zona pellucida-like domains 1	NM_022034	NM_022034,NP_071317,NR_037912
ENSG00000164128	207.543	1.81882	0.138376	13.144	1.84124e-39	5.27288e-38	4886	1	4886	neuropeptide Y receptor Y1	neuropeptide Y receptor Y1	NM_000909	NM_000909,NP_000900,XM_005263031,XM_011532010,XP_005263088,XP_011530312
ENSG00000251226	12.1607	1.81825	0.308796	5.88818	3.90464e-09	2.75089e-08	NA	0	NA	NA	NA	NA	NA
ENSG00000258525	37.1801	1.81791	0.26397	6.8868	5.70632e-12	5.04385e-11	100506071	1	100506071	uncharacterized LOC100506071	uncharacterized LOC100506071	NR_038356	NR_038356
ENSG00000119772	1016.52	1.8179	0.0665	27.3369	1.54644e-164	4.02022e-162	1788	1	1788	DNA (cytosine-5-)-methyltransferase 3 alpha	DNA (cytosine-5-)-methyltransferase 3 alpha	NM_022552	NM_022552,NM_153759,NM_175629,NM_175630,NP_072046,NP_715640,NP_783328,NP_783329,XM_005264175,XM_005264177,XM_006711957,XM_006711958,XM_011532662,XM_011532663,XM_011532664,XM_011532665,XM_011532666,XM_011532667,XM_011532668,XP_005264232,XP_005264234,XP_006712020,XP_006712021,XP_011530964,XP_011530965,XP_011530966,XP_011530967,XP_011530968,XP_011530969,XP_011530970
ENSG00000204717	22.2165	1.81587	0.300861	6.03559	1.58385e-09	1.15516e-08	NA	0	NA	NA	NA	NA	NA
ENSG00000253363	13.2081	1.81548	0.308913	5.877	4.17774e-09	2.93533e-08	105379374	1	105379374	uncharacterized LOC105379374	uncharacterized LOC105379374	XR_949671	XR_949671,XR_956761,XR_956762
ENSG00000159184	555.123	1.81206	0.0876243	20.6799	5.25299e-95	4.89658e-93	10481	1	10481	homeobox B13	homeobox B13	NM_006361	NM_006361,NP_006352
ENSG00000187268	5.38374	1.80969	0.297439	6.08424	1.17042e-09	8.62223e-09	171484	1	171484	family with sequence similarity 9, member C	family with sequence similarity 9, member C	NM_174901	NM_174901,NP_777561,XM_005274460,XM_011545466,XP_005274517,XP_011543768
ENSG00000166105	134.122	1.80874	0.16162	11.1913	4.49831e-29	9.20795e-28	112937	1	112937	galactosidase, beta 1-like 3	galactosidase, beta 1-like 3	NM_001080407	NM_001080407,NM_138416,NP_001073876,XM_011542566,XM_011542567,XM_011542568,XM_011542569,XM_011542570,XM_011542571,XM_011542572,XM_011542573,XM_011542574,XM_011542575,XP_011540868,XP_011540869,XP_011540870,XP_011540871,XP_011540872,XP_011540873,XP_011540874,XP_011540875,XP_011540876,XP_011540877,XR_947791
ENSG00000188219	15.6394	1.80687	0.30468	5.93038	3.02236e-09	2.14937e-08	445582	1	445582	POTE ankyrin domain family, member E	POTE ankyrin domain family, member E	NM_001004054	NM_001004054,NM_001005359,NM_001005364,NM_001083538,NP_001077007,XM_011511216,XM_011511217,XP_011509518,XP_011509519
ENSG00000268902	11.0721	1.80129	0.30986	5.81323	6.12785e-09	4.23305e-08	NA	0	NA	NA	NA	NA	NA
ENSG00000065361	269.219	1.79954	0.118947	15.129	1.04258e-51	4.0997e-50	2065	1	2065	erb-b2 receptor tyrosine kinase 3	erb-b2 receptor tyrosine kinase 3	NM_001005915	NM_001005915,NM_001982,NP_001005915,NP_001973
ENSG00000231976	15.7947	1.79754	0.3071	5.85327	4.81991e-09	3.36631e-08	NA	0	NA	NA	NA	NA	NA
ENSG00000124126	305.845	1.7959	0.109806	16.3552	3.99366e-60	1.8763e-58	57580	1	57580	phosphatidylinositol-3,4,5-trisphosphate-dependent Rac exchange factor 1	phosphatidylinositol-3,4,5-trisphosphate-dependent Rac exchange factor 1	NM_020820	NM_020820,NP_065871,XM_005260471,XM_011528934,XM_011528935,XP_005260528,XP_011527236,XP_011527237
ENSG00000183317	31.7255	1.79306	0.266661	6.7241	1.76681e-11	1.50539e-10	284656	1	284656	EPH receptor A10	EPH receptor A10	NM_001004338	NM_001004338,NM_001099439,NM_173641,NP_001092909,NP_775912,XM_006710584,XP_006710647,XR_946610,XR_946611,XR_946612,XR_946613,XR_946614
ENSG00000183914	7.66484	1.79276	0.309592	5.79072	7.00838e-09	4.80866e-08	146754	1	146754	dynein, axonemal, heavy chain 2	dynein, axonemal, heavy chain 2	NM_001303270	NM_001303270,NM_020877,NP_001290199,NP_065928,XM_011523663,XM_011523664,XM_011523665,XM_011523666,XM_011523667,XM_011523668,XM_011523669,XM_011523670,XP_011521965,XP_011521966,XP_011521967,XP_011521968,XP_011521969,XP_011521970,XP_011521971,XP_011521972
ENSG00000250486	19.0077	1.79225	0.303798	5.89948	3.64644e-09	2.5783e-08	152756	1	152756	family with sequence similarity 218, member A	family with sequence similarity 218, member A	NM_153027	NM_153027,NP_694572
ENSG00000259803	38.7429	1.78417	0.260034	6.86128	6.82476e-12	5.9917e-11	146429	1	146429	solute carrier family 22, member 31	solute carrier family 22, member 31	NM_001242757	NM_001242757,NP_001229686,XM_011522896,XM_011522897,XM_011522898,XM_011522899,XM_011522900,XM_011522901,XP_011521198,XP_011521199,XP_011521200,XP_011521201,XP_011521202,XP_011521203
ENSG00000070601	54.626	1.78337	0.223499	7.97931	1.47155e-15	1.64894e-14	22844	1	22844	FERM and PDZ domain containing 1	FERM and PDZ domain containing 1	NM_014907	NM_014907,NP_055722,XM_011517803,XM_011517804,XM_011517805,XM_011517806,XP_011516105,XP_011516106,XP_011516107,XP_011516108,XR_929220
ENSG00000175063	22.5151	1.78187	0.277317	6.42538	1.31543e-10	1.05293e-09	11065	1	11065	ubiquitin-conjugating enzyme E2C	ubiquitin-conjugating enzyme E2C	NM_001281741	NM_001281741,NM_001281742,NM_007019,NM_181799,NM_181800,NM_181801,NM_181802,NM_181803,NP_001268670,NP_001268671,NP_008950,NP_861515,NP_861516,NP_861517,NR_104036,NR_104037
ENSG00000214429	25.0052	1.77852	0.285447	6.23065	4.64511e-10	3.54474e-09	NA	0	NA	NA	NA	NA	NA
ENSG00000077935	17.8893	1.77613	0.305334	5.81701	5.99107e-09	4.14101e-08	27127	1	27127	structural maintenance of chromosomes 1B	structural maintenance of chromosomes 1B	NM_001291501	NM_001291501,NM_148674,NP_001278430,NP_683515,XM_011530144,XM_011530145,XM_011530146,XP_011528446,XP_011528447,XP_011528448,XR_244368
ENSG00000260289	10.218	1.77507	0.310058	5.72496	1.03457e-08	6.97976e-08	NA	0	NA	NA	NA	NA	NA
ENSG00000219438	50.8504	1.77315	0.246458	7.19452	6.26793e-13	5.97113e-12	25817	1	25817	family with sequence similarity 19 (chemokine (C-C motif)-like), member A5	family with sequence similarity 19 (chemokine (C-C motif)-like), member A5	NM_001082967	NM_001082967,NM_015381,NP_001076436,NP_056196
ENSG00000257636	22.6648	1.77239	0.292874	6.05171	1.43314e-09	1.04949e-08	NA	0	NA	NA	NA	NA	NA
ENSG00000140403	34.8471	1.77204	0.287704	6.15923	7.30977e-10	5.48511e-09	55466	1	55466	DnaJ (Hsp40) homolog, subfamily A, member 4	DnaJ (Hsp40) homolog, subfamily A, member 4	NM_001130182	NM_001130182,NM_001130183,NM_018602,NP_001123654,NP_001123655,NP_061072,XM_005254535,XM_006720601,XP_005254592,XP_006720664
ENSG00000175600	192.433	1.77155	0.13986	12.6666	9.05364e-37	2.42922e-35	79783	1	79783	succinyl-CoA:glutarate-CoA transferase	succinyl-CoA:glutarate-CoA transferase	NM_001193311	NM_001193311,NM_001193312,NM_001193313,NM_024728,NP_001180240,NP_001180241,NP_001180242,NP_079004,XM_006715775,XM_011515525,XM_011515526,XM_011515527,XM_011515528,XM_011515529,XM_011515530,XP_006715838,XP_011513827,XP_011513828,XP_011513829,XP_011513830,XP_011513831,XP_011513832
ENSG00000126947	8.32663	1.76755	0.310182	5.69842	1.20926e-08	8.11151e-08	51309	1	51309	armadillo repeat containing, X-linked 1	armadillo repeat containing, X-linked 1	NM_016608	NM_016608,NP_057692
ENSG00000250786	32.4132	1.75754	0.255187	6.88725	5.68802e-12	5.02958e-11	100505806	1	100505806	small nucleolar RNA host gene 18	small nucleolar RNA host gene 18	NR_045196	NR_045196
ENSG00000159167	11.7108	1.75539	0.31039	5.65544	1.55445e-08	1.03205e-07	6781	1	6781	stanniocalcin 1	stanniocalcin 1	NM_003155	NM_003155,NP_003146
ENSG00000264956	19.7025	1.75373	0.303501	5.77835	7.54358e-09	5.15923e-08	NA	0	NA	NA	NA	NA	NA
ENSG00000205002	13.7347	1.75214	0.308394	5.68148	1.33533e-08	8.92139e-08	441376	1	441376	alanine and arginine rich domain containing protein	alanine and arginine rich domain containing protein	NM_001025357	NM_001025357,NP_001020528,XM_011517043,XP_011515345
ENSG00000113722	6.91439	1.74992	0.307909	5.68322	1.32184e-08	8.83376e-08	1044	1	1044	caudal type homeobox 1	caudal type homeobox 1	NM_001804	NM_001804,NP_001795
ENSG00000237594	23.6405	1.74611	0.292485	5.96991	2.3738e-09	1.70472e-08	150051	1	150051	homeobox protein cut-like 1	homeobox protein cut-like 1	XR_109661	XR_109661,XR_172342
ENSG00000116852	158.836	1.74162	0.141078	12.3451	5.17383e-35	1.32009e-33	23046	1	23046	kinesin family member 21B	kinesin family member 21B	NM_001252100	NM_001252100,NM_001252102,NM_001252103,NM_017596,NP_001239029,NP_001239031,NP_001239032,NP_060066,XR_921754,XR_921755,XR_921756,XR_921757,XR_921758
ENSG00000204060	52.3968	1.74085	0.230359	7.55714	4.12036e-14	4.2525e-13	100132074	1	100132074	forkhead box O6	forkhead box O6	NM_001291281	NM_001291281,NP_001278210,XM_011548721,XP_011547023
ENSG00000127124	80.4123	1.73864	0.191703	9.06946	1.19608e-19	1.66278e-18	59269	1	59269	human immunodeficiency virus type I enhancer binding protein 3	human immunodeficiency virus type I enhancer binding protein 3	NM_001127714	NM_001127714,NM_024503,NP_001121186,NP_078779,NR_038260,NR_038261,XM_006710808,XM_006710809,XM_011541884,XM_011541885,XM_011541886,XM_011541887,XP_006710871,XP_006710872,XP_011540186,XP_011540187,XP_011540188,XP_011540189,XR_426625
ENSG00000175874	18.9474	1.73355	0.301222	5.75506	8.66091e-09	5.88555e-08	200407	1	200407	cellular repressor of E1A-stimulated genes 2	cellular repressor of E1A-stimulated genes 2	NM_153836	NM_153836,NP_722578,XM_011510777,XP_011509079
ENSG00000105639	13.7884	1.73243	0.303319	5.71155	1.11949e-08	7.52882e-08	3718	1	3718	Janus kinase 3	Janus kinase 3	NM_000215	NM_000215,NP_000206,XM_005259896,XM_006722745,XM_011527990,XM_011527991,XP_005259953,XP_006722808,XP_011526292,XP_011526293,XR_430137
ENSG00000162576	178.355	1.73005	0.14142	12.2334	2.06144e-34	5.14195e-33	54587	1	54587	matrix-remodelling associated 8	matrix-remodelling associated 8	NM_001282582	NM_001282582,NM_001282583,NM_001282584,NM_001282585,NM_032348,NP_001269511,NP_001269512,NP_001269513,NP_001269514,NP_115724
ENSG00000214140	15.2234	1.7265	0.308917	5.58889	2.28525e-08	1.4931e-07	768206	1	768206	progressive rod-cone degeneration	progressive rod-cone degeneration	NM_001077620	NM_001077620,NP_001071088,NR_033357,XM_011525184,XP_011523486
ENSG00000117643	182.354	1.72597	0.13988	12.3389	5.58988e-35	1.42469e-33	57134	1	57134	mannosidase, alpha, class 1C, member 1	mannosidase, alpha, class 1C, member 1	NM_001289010	NM_001289010,NM_020379,NP_001275939,NP_065112,XM_005245945,XM_011541805,XP_005246002,XP_011540107
ENSG00000145721	15.7032	1.72515	0.302507	5.70283	1.17833e-08	7.91317e-08	167410	1	167410	limb and CNS expressed 1	limb and CNS expressed 1	NM_153234	NM_153234,NP_694966
ENSG00000214617	25.1483	1.72482	0.298104	5.78595	7.21056e-09	4.94013e-08	386757	1	386757	solute carrier family 6 (neurotransmitter transporter), member 10, pseudogene	solute carrier family 6 (neurotransmitter transporter), member 10, pseudogene	NM_198857	NM_198857,NR_003083
ENSG00000159307	37.5401	1.72462	0.255026	6.7625	1.35626e-11	1.16621e-10	80274	1	80274	signal peptide, CUB domain, EGF-like 1	signal peptide, CUB domain, EGF-like 1	NM_173050	NM_173050,NP_766638,XM_005261752,XM_011530389,XM_011530390,XM_011530391,XP_005261809,XP_011528691,XP_011528692,XP_011528693
ENSG00000164398	99.0756	1.72352	0.184737	9.32956	1.0631e-20	1.55848e-19	23305	2	23305728637	acyl-CoA synthetase long-chain family member 6	acyl-CoA synthetase long-chain family member 6	NM_001009185	NM_001009185,NM_001205247,NM_001205248,NM_001205250,NM_001205251,NM_015256,NP_001009185,NP_001192176,NP_001192177,NP_001192179,NP_001192180,NP_056071
ENSG00000180801	79.7343	1.72132	0.190657	9.02835	1.74286e-19	2.39869e-18	79642	1	79642	arylsulfatase family, member J	arylsulfatase family, member J	NM_024590	NM_024590,NP_078866,XM_005263212,XM_005263213,XM_011532238,XM_011532239,XM_011532240,XM_011532241,XM_011532242,XP_005263269,XP_005263270,XP_011530540,XP_011530541,XP_011530542,XP_011530543,XP_011530544,XR_938770
ENSG00000173175	22.7692	1.72108	0.280447	6.13693	8.41306e-10	6.2708e-09	111	1	111	adenylate cyclase 5	adenylate cyclase 5	NM_001199642	NM_001199642,NM_183357,NP_001186571,NP_899200,XM_005247077,XM_005247078,XM_006713483,XM_006713484,XM_011512358,XM_011512359,XM_011512360,XM_011512361,XP_005247134,XP_005247135,XP_006713546,XP_006713547,XP_011510660,XP_011510661,XP_011510662,XP_011510663
ENSG00000236924	14.0222	1.71822	0.30817	5.57556	2.46738e-08	1.60806e-07	NA	0	NA	NA	NA	NA	NA
ENSG00000115138	10.432	1.71818	0.310006	5.54241	2.98332e-08	1.93354e-07	5443	1	5443	proopiomelanocortin	proopiomelanocortin	NM_000939	NM_000939,NM_001035256,NP_000930,NP_001030333,XM_011532917,XP_011531219
ENSG00000132975	21.4488	1.71751	0.299125	5.74176	9.36953e-09	6.34314e-08	2835	1	2835	G protein-coupled receptor 12	G protein-coupled receptor 12	NM_005288	NM_005288,NP_005279,XM_005266360,XP_005266417
ENSG00000118898	69.3569	1.71568	0.201656	8.50796	1.77027e-17	2.20431e-16	5493	1	5493	periplakin	periplakin	NM_002705	NM_002705,NP_002696,XM_006720902,XP_006720965
ENSG00000117407	11.224	1.71356	0.308103	5.56164	2.67255e-08	1.73645e-07	9048	1	9048	artemin	artemin	NM_001136215	NM_001136215,NM_003976,NM_057090,NM_057091,NM_057160,NP_001129687,NP_476431,NP_476432,XM_006711024,XM_011542402,XP_006711087,XP_011540704
ENSG00000106236	159.151	1.71238	0.143619	11.923	8.97658e-33	2.10657e-31	4885	1	4885	neuronal pentraxin II	neuronal pentraxin II	NM_002523	NM_002523,NP_002514
ENSG00000187608	178.716	1.71167	0.139102	12.3052	8.49578e-35	2.15125e-33	9636	1	9636	ISG15 ubiquitin-like modifier	ISG15 ubiquitin-like modifier	NM_005101	NM_005101,NP_005092
ENSG00000103489	8.43392	1.71126	0.310125	5.51798	3.42928e-08	2.21093e-07	64131	1	64131	xylosyltransferase I	xylosyltransferase I	NM_022166	NM_022166,NP_071449,XM_011522574,XP_011520876
ENSG00000133816	283.374	1.70828	0.118332	14.4364	3.05431e-47	1.065e-45	9645	1	9645	microtubule associated monooxygenase, calponin and LIM domain containing 2	microtubule associated monooxygenase, calponin and LIM domain containing 2	NM_001282663	NM_001282663,NM_001282664,NM_001282665,NM_001282666,NM_001282667,NM_001282668,NM_014632,NP_001269592,NP_001269593,NP_001269594,NP_001269595,NP_001269596,NP_001269597,NP_055447,XM_005253249,XM_011520490,XM_011520491,XP_005253306,XP_011518792,XP_011518793
ENSG00000119865	153.149	1.70817	0.169095	10.1019	5.41977e-24	9.22228e-23	25927	1	25927	cannabinoid receptor interacting protein 1	cannabinoid receptor interacting protein 1	NM_001111101	NM_001111101,NM_015463,NP_001104571,NP_056278,XM_005264249,XM_006711984,XP_005264306,XP_006712047
ENSG00000143416	10.6225	1.70623	0.310261	5.49935	3.81198e-08	2.4489e-07	8991	1	8991	selenium binding protein 1	selenium binding protein 1	NM_001258288	NM_001258288,NM_001258289,NM_003944,NP_001245217,NP_001245218,NP_003935,XM_011510110,XM_011510111,XP_011508412,XP_011508413,XR_921993
ENSG00000196345	19.3699	1.70522	0.304335	5.60312	2.10529e-08	1.37783e-07	55888	1	55888	zinc finger with KRAB and SCAN domains 7	zinc finger with KRAB and SCAN domains 7	NM_001288590	NM_001288590,NM_001288591,NM_001288592,NM_018651,NM_025169,NP_001275519,NP_001275520,NP_001275521,NP_061121,NP_079445,XM_011533957,XM_011533958,XM_011533959,XM_011533960,XM_011533961,XM_011533962,XM_011533963,XM_011548733,XM_011548734,XM_011548735,XM_011548736,XM_011548737,XM_011548738,XM_011548739,XM_011548740,XP_011532259,XP_011532260,XP_011532261,XP_011532262,XP_011532263,XP_011532264,XP_01153…
ENSG00000243279	51.0601	1.70509	0.232013	7.34912	1.99523e-13	1.96806e-12	11230	1	11230	PRA1 domain family, member 2	PRA1 domain family, member 2	NM_007213	NM_007213,NP_009144
ENSG00000132031	24.1629	1.70209	0.29033	5.8626	4.55668e-09	3.18913e-08	4148	1	4148	matrilin 3	matrilin 3	NM_002381	NM_002381,NP_002372
ENSG00000223760	12.8352	1.70197	0.309155	5.50522	3.68707e-08	2.37191e-07	285103	1	285103	mediator complex subunit 15 pseudogene 9	mediator complex subunit 15 pseudogene 9	NR_033903	NR_033903
ENSG00000186417	19.5485	1.70049	0.301567	5.63883	1.71214e-08	1.13129e-07	342035	1	342035	gliomedin	gliomedin	NM_181789	NM_181789,NP_861454,XM_011521501,XP_011519803
ENSG00000213225	131.359	1.69844	0.170492	9.96201	2.23508e-23	3.69831e-22	NA	0	NA	NA	NA	NA	NA
ENSG00000280002	13.4051	1.69455	0.308584	5.49137	3.98818e-08	2.55788e-07	NA	0	NA	NA	NA	NA	NA
ENSG00000101898	15.039	1.69026	0.298111	5.6699	1.42883e-08	9.50263e-08	NA	0	NA	NA	NA	NA	NA
ENSG00000170379	14.338	1.68802	0.305275	5.5295	3.21137e-08	2.07616e-07	285966	1	285966	TRPM8 channel-associated factor 2	TRPM8 channel-associated factor 2	NM_001130025	NM_001130025,NM_001130026,NM_173678,NP_001123497,NP_001123498,NP_775949,XM_006715927,XM_006715928,XM_011516059,XP_006715990,XP_006715991,XP_011514361
ENSG00000258240	11.3885	1.68723	0.309781	5.44653	5.13611e-08	3.25928e-07	NA	0	NA	NA	NA	NA	NA
ENSG00000177875	58.6242	1.6848	0.214226	7.86459	3.70318e-15	4.06585e-14	387856	1	387856	coiled-coil domain containing 184	coiled-coil domain containing 184	NM_001013635	NM_001013635,NP_001013657
ENSG00000112309	103.914	1.68419	0.190608	8.83593	9.92709e-19	1.31818e-17	135152	1	135152	beta-1,3-glucuronyltransferase 2	beta-1,3-glucuronyltransferase 2	NM_080742	NM_080742,NP_542780,XM_006715346,XP_006715409
ENSG00000160145	109.257	1.68419	0.175887	9.5754	1.01465e-21	1.55466e-20	8997	1	8997	kalirin, RhoGEF kinase	kalirin, RhoGEF kinase	NM_001024660	NM_001024660,NM_003947,NM_007064,NP_001019831,NP_003938,NP_008995,NR_028136,XM_006713810,XM_006713811,XM_006713812,XM_006713813,XM_006713814,XM_006713815,XM_006713817,XM_011513279,XM_011513280,XM_011513281,XM_011513282,XM_011513283,XM_011513284,XM_011513285,XM_011513286,XP_006713873,XP_006713874,XP_006713875,XP_006713876,XP_006713877,XP_006713878,XP_006713880,XP_011511581,XP_011511582,XP_01151158…
ENSG00000175707	11.3212	1.68047	0.309671	5.42665	5.74229e-08	3.62919e-07	126695	1	126695	keratinocyte differentiation factor 1	keratinocyte differentiation factor 1	NM_152365	NM_152365,NP_689578,XM_005245735,XM_011540622,XP_005245792,XP_011538924
ENSG00000251026	25.0799	1.67971	0.280405	5.9903	2.0946e-09	1.51211e-08	NA	0	NA	NA	NA	NA	NA
ENSG00000142552	433.95	1.67607	0.0933362	17.9573	4.20432e-72	2.60234e-70	57333	1	57333	reticulocalbin 3, EF-hand calcium binding domain	reticulocalbin 3, EF-hand calcium binding domain	NM_020650	NM_020650,NP_065701,XM_005259089,XM_011527143,XP_005259146,XP_011525445
ENSG00000027075	170.823	1.67507	0.145681	11.4982	1.34703e-30	2.92361e-29	5583	1	5583	protein kinase C, eta	protein kinase C, eta	NM_006255	NM_006255,NP_006246,XM_011536954,XM_011536955,XM_011536956,XM_011536957,XP_011535256,XP_011535257,XP_011535258,XP_011535259
ENSG00000228549	13.6211	1.67418	0.307111	5.45139	4.99775e-08	3.17579e-07	NA	0	NA	NA	NA	NA	NA
ENSG00000105825	112.695	1.67417	0.174471	9.59564	8.33949e-22	1.28283e-20	7980	1	7980	tissue factor pathway inhibitor 2	tissue factor pathway inhibitor 2	NM_001271003	NM_001271003,NM_001271004,NM_006528,NP_001257932,NP_001257933,NP_006519
ENSG00000267327	12.0456	1.67371	0.309099	5.4148	6.13571e-08	3.86218e-07	NA	0	NA	NA	NA	NA	NA
ENSG00000147100	594.439	1.67314	0.0890064	18.798	7.84497e-79	5.63033e-77	6567	1	6567	solute carrier family 16, member 2 (thyroid hormone transporter)	solute carrier family 16, member 2 (thyroid hormone transporter)	NM_006517	NM_006517,NP_006508,XM_005262294,XM_011531015,XP_005262351,XP_011529317
ENSG00000215452	16.1402	1.67192	0.30573	5.46864	4.53512e-08	2.8936e-07	NA	0	NA	NA	NA	NA	NA
ENSG00000129244	71.503	1.67181	0.19835	8.4286	3.49833e-17	4.28536e-16	482	1	482	ATPase, Na+/K+ transporting, beta 2 polypeptide	ATPase, Na+/K+ transporting, beta 2 polypeptide	NM_001303263	NM_001303263,NM_001678,NP_001290192,NP_001669
ENSG00000266524	10.3674	1.67134	0.310376	5.38488	7.24918e-08	4.53379e-07	2662	1	2662	growth differentiation factor 10	growth differentiation factor 10	NM_004962	NM_004962,NP_004953,XM_006717762,XP_006717825
ENSG00000268686	11.6095	1.67021	0.309912	5.38931	7.07274e-08	4.42936e-07	101928295	1	101928295	uncharacterized LOC101928295	uncharacterized LOC101928295	NR_110729	NR_110729
ENSG00000178187	15.0653	1.66751	0.304706	5.47251	4.43702e-08	2.83332e-07	285676	1	285676	zinc finger protein 454	zinc finger protein 454	NM_001178089	NM_001178089,NM_001178090,NM_182594,NP_001171560,NP_001171561,NP_872400,XM_006714855,XM_011534532,XM_011534533,XP_006714918,XP_011532834,XP_011532835
ENSG00000111679	9.15858	1.66686	0.310785	5.36338	8.16773e-08	5.0784e-07	5777	1	5777	protein tyrosine phosphatase, non-receptor type 6	protein tyrosine phosphatase, non-receptor type 6	NM_002831	NM_002831,NM_080548,NM_080549,NP_002822,NP_536858,NP_536859,XM_006718994,XM_011520988,XM_011520989,XP_006719057,XP_011519290,XP_011519291,XR_931520
ENSG00000128917	21.3094	1.66582	0.284056	5.86441	4.50726e-09	3.15643e-08	54567	1	54567	delta-like 4 (Drosophila)	delta-like 4 (Drosophila)	NM_019074	NM_019074,NP_061947
ENSG00000273588	11.3391	1.66399	0.309638	5.374	7.70073e-08	4.79952e-07	NA	0	NA	NA	NA	NA	NA
ENSG00000124134	14.1566	1.66311	0.308051	5.39881	6.70837e-08	4.21358e-07	3787	1	3787	potassium voltage-gated channel, modifier subfamily S, member 1	potassium voltage-gated channel, modifier subfamily S, member 1	NM_002251	NM_002251,NP_002242,XM_005260409,XP_005260466
ENSG00000237172	31.8856	1.66248	0.26112	6.36672	1.93115e-10	1.51927e-09	84752	1	84752	UDP-GlcNAc:betaGal beta-1,3-N-acetylglucosaminyltransferase 9	UDP-GlcNAc:betaGal beta-1,3-N-acetylglucosaminyltransferase 9	NM_033309	NM_033309,NP_171608
ENSG00000158856	141.532	1.66104	0.155788	10.6622	1.52916e-26	2.86821e-25	2039	1	2039	dematin actin binding protein	dematin actin binding protein	NM_001114135	NM_001114135,NM_001114136,NM_001114137,NM_001114138,NM_001114139,NM_001302816,NM_001302817,NM_001978,NP_001107607,NP_001107608,NP_001107609,NP_001107610,NP_001107611,NP_001289745,NP_001289746,NP_001969,XM_005273431,XM_005273432,XM_005273433,XM_005273434,XM_005273435,XM_005273436,XM_005273439,XM_005273440,XM_005273441,XM_005273442,XM_005273443,XM_005273446,XM_011544435,XM_011544436,XM_011544437,XM…
ENSG00000163689	149.788	1.65955	0.157547	10.5337	6.04114e-26	1.11647e-24	200844	1	200844	chromosome 3 open reading frame 67	chromosome 3 open reading frame 67	NM_198463	NM_198463,NP_940865,XM_005264929,XM_005264931,XM_006713013,XM_011533450,XM_011533451,XM_011533452,XM_011533453,XM_011533454,XM_011533455,XM_011533456,XM_011533457,XM_011533458,XM_011533459,XM_011533460,XM_011533461,XM_011533462,XM_011533463,XM_011533464,XP_005264986,XP_005264988,XP_006713076,XP_011531752,XP_011531753,XP_011531754,XP_011531755,XP_011531756,XP_011531757,XP_011531758,XP_011531759,XP…
ENSG00000144229	150.245	1.65954	0.150903	10.9974	3.93347e-28	7.80588e-27	80731	1	80731	thrombospondin, type I, domain containing 7B	thrombospondin, type I, domain containing 7B	NM_001080427	NM_001080427,NP_001073896,XM_005263802,XP_005263859
ENSG00000117971	27.6607	1.6585	0.269992	6.14279	8.1086e-10	6.05544e-09	1143	1	1143	cholinergic receptor, nicotinic, beta 4 (neuronal)	cholinergic receptor, nicotinic, beta 4 (neuronal)	NM_000750	NM_000750,NM_001256567,NP_000741,NP_001243496,XM_011521181,XM_011521182,XM_011521183,XM_011521184,XM_011521185,XM_011521186,XM_011521187,XM_011521188,XM_011521189,XM_011521190,XM_011521191,XM_011521192,XM_011521193,XP_011519483,XP_011519484,XP_011519485,XP_011519486,XP_011519487,XP_011519488,XP_011519489,XP_011519490,XP_011519491,XP_011519492,XP_011519493,XP_011519494,XP_011519495
ENSG00000171649	295.314	1.65838	0.111266	14.9046	3.0747e-50	1.17355e-48	284307	1	284307	zinc finger protein interacting with K protein 1	zinc finger protein interacting with K protein 1	NM_001010879	NM_001010879,NP_001010879,XM_005258769,XM_011526760,XM_011526761,XM_011526762,XM_011526763,XM_011526764,XM_011526765,XM_011526766,XM_011526767,XP_005258826,XP_011525062,XP_011525063,XP_011525064,XP_011525065,XP_011525066,XP_011525067,XP_011525068,XP_011525069
ENSG00000148344	76.1516	1.65796	0.193813	8.55444	1.18442e-17	1.4835e-16	9536	1	9536	prostaglandin E synthase	prostaglandin E synthase	NM_004878	NM_004878,NM_198797,NP_004869,XM_011519210,XP_011517512
ENSG00000167800	6.61532	1.65761	0.304318	5.44697	5.12354e-08	3.25218e-07	347853	1	347853	T-box 10	T-box 10	NM_005995	NM_005995,NP_005986,XM_011544992,XM_011544993,XP_011543294,XP_011543295
ENSG00000101004	201.795	1.65716	0.134861	12.2879	1.0524e-34	2.6562e-33	22981	1	22981	ninein-like	ninein-like	NM_025176	NM_025176,NP_079452,XM_005260679,XM_011529186,XM_011529187,XM_011529188,XM_011529189,XM_011529190,XM_011529191,XM_011529192,XM_011529193,XM_011529194,XM_011529195,XM_011529196,XM_011529197,XM_011529198,XP_005260736,XP_011527488,XP_011527489,XP_011527490,XP_011527491,XP_011527492,XP_011527493,XP_011527494,XP_011527495,XP_011527496,XP_011527497,XP_011527498,XP_011527499,XP_011527500
ENSG00000182256	18.3381	1.65708	0.297934	5.5619	2.66855e-08	1.73434e-07	2567	1	2567	gamma-aminobutyric acid (GABA) A receptor, gamma 3	gamma-aminobutyric acid (GABA) A receptor, gamma 3	NM_001270873	NM_001270873,NM_033223,NP_001257802,NP_150092,XM_011521430,XM_011521431,XM_011521432,XP_011519732,XP_011519733,XP_011519734
ENSG00000162676	97.7936	1.65212	0.184484	8.95536	3.38631e-19	4.59035e-18	2672	1	2672	growth factor independent 1 transcription repressor	growth factor independent 1 transcription repressor	NM_001127215	NM_001127215,NM_001127216,NM_005263,NP_001120687,NP_001120688,NP_005254,XM_005270749,XM_011541245,XM_011541246,XP_005270806,XP_011539547,XP_011539548
ENSG00000121742	100.995	1.64997	0.183509	8.99123	2.44475e-19	3.32944e-18	10804	1	10804	gap junction protein, beta 6, 30kDa	gap junction protein, beta 6, 30kDa	NM_001110219	NM_001110219,NM_001110220,NM_001110221,NM_006783,NP_001103689,NP_001103690,NP_001103691,NP_006774
ENSG00000115963	330.115	1.64901	0.106092	15.5432	1.76857e-54	7.34976e-53	390	1	390	Rho family GTPase 3	Rho family GTPase 3	NM_001254738	NM_001254738,NM_005168,NP_001241667,NP_005159
ENSG00000264067	6.77132	1.649	0.30436	5.41792	6.02955e-08	3.80047e-07	NA	0	NA	NA	NA	NA	NA
ENSG00000257582	15.5317	1.64857	0.307735	5.35712	8.45582e-08	5.24916e-07	101927324	1	101927324	long intergenic non-protein coding RNA 1475	long intergenic non-protein coding RNA 1475	NR_120618	NR_120618
ENSG00000257135	26.0095	1.64776	0.282196	5.83906	5.24957e-09	3.65875e-08	NA	0	NA	NA	NA	NA	NA
ENSG00000274286	25.1647	1.64759	0.273912	6.01504	1.79846e-09	1.30557e-08	151	1	151	adrenoceptor alpha 2B	adrenoceptor alpha 2B	NM_000682	NM_000682,NP_000673
ENSG00000259834	12.8463	1.64743	0.309147	5.32896	9.87766e-08	6.09622e-07	NA	0	NA	NA	NA	NA	NA
ENSG00000150054	254.562	1.64712	0.11725	14.048	7.92692e-45	2.58309e-43	143098	1	143098	membrane protein, palmitoylated 7 (MAGUK p55 subfamily member 7)	membrane protein, palmitoylated 7 (MAGUK p55 subfamily member 7)	NM_173496	NM_173496,NP_775767,XM_005252367,XM_005252368,XM_005252369,XM_011519337,XM_011519338,XM_011519339,XM_011519340,XM_011519341,XP_005252424,XP_005252425,XP_005252426,XP_011517639,XP_011517640,XP_011517641,XP_011517642,XP_011517643,XR_930470
ENSG00000197153	45.9637	1.6459	0.259384	6.34545	2.21782e-10	1.73604e-09	8356	1	8356	histone cluster 1, H3j	histone cluster 1, H3j	NM_003535	NM_003535,NP_003526
ENSG00000138356	19.5932	1.64561	0.30055	5.47533	4.36689e-08	2.79159e-07	316	1	316	aldehyde oxidase 1	aldehyde oxidase 1	NM_001159	NM_001159,NP_001150,XM_011511062,XP_011509364,XR_922913
ENSG00000162373	46.6086	1.64372	0.231181	7.1101	1.15963e-12	1.08052e-11	79656	1	79656	BEN domain containing 5	BEN domain containing 5	NM_001302082	NM_001302082,NM_024603,NP_001289011,NP_078879,XM_006710895,XM_006710897,XM_011542141,XM_011542142,XP_006710958,XP_006710960,XP_011540443,XP_011540444
ENSG00000036672	310.716	1.64205	0.109395	15.0102	6.29168e-51	2.42915e-49	9099	1	9099	ubiquitin specific peptidase 2	ubiquitin specific peptidase 2	NM_001243759	NM_001243759,NM_004205,NM_171997,NP_001230688,NP_004196,NP_741994,XM_005271721,XM_005271722,XP_005271778,XP_005271779
ENSG00000125775	33.6702	1.64058	0.256631	6.39276	1.62918e-10	1.2917e-09	27111	1	27111	syndecan binding protein (syntenin) 2	syndecan binding protein (syntenin) 2	NM_001199784	NM_001199784,NM_015685,NM_080489,NP_001186713,NP_056500,NP_536737
ENSG00000216775	252.698	1.63954	0.118295	13.8598	1.10942e-43	3.5412e-42	730101	1	730101	uncharacterized LOC730101	uncharacterized LOC730101	NR_024403	NR_024403,NR_024405
ENSG00000161642	309.584	1.63905	0.110068	14.8912	3.75739e-50	1.43179e-48	25946	1	25946	zinc finger protein 385A	zinc finger protein 385A	NM_001130967	NM_001130967,NM_001130968,NM_001290001,NM_001290002,NM_001290004,NM_015481,NP_001124439,NP_001124440,NP_001276930,NP_001276931,NP_001276933,NP_056296,XM_005268783,XM_006719342,XM_011538168,XM_011538169,XM_011538170,XM_011538171,XP_005268840,XP_006719405,XP_011536470,XP_011536471,XP_011536472,XP_011536473
ENSG00000118508	213.383	1.63838	0.12953	12.6486	1.13882e-36	3.04863e-35	10981	1	10981	RAB32, member RAS oncogene family	RAB32, member RAS oncogene family	NM_006834	NM_006834,NP_006825
ENSG00000021300	34.7107	1.63833	0.258089	6.34793	2.18233e-10	1.70941e-09	58473	1	58473	pleckstrin homology domain containing, family B (evectins) member 1	pleckstrin homology domain containing, family B (evectins) member 1	NM_001130033	NM_001130033,NM_001130034,NM_001130035,NM_001130036,NM_021200,NP_001123505,NP_001123506,NP_001123507,NP_001123508,NP_067023,XM_011545192,XM_011545193,XM_011545194,XP_011543494,XP_011543495,XP_011543496
ENSG00000166405	24.3344	1.63614	0.301941	5.41874	6.00203e-08	3.78618e-07	79608	1	79608	RIC3 acetylcholine receptor chaperone	RIC3 acetylcholine receptor chaperone	NM_001135109	NM_001135109,NM_001206671,NM_001206672,NM_024557,NP_001128581,NP_001193600,NP_001193601,NP_078833,NR_045405,XM_006718317,XM_006718318,XM_006718321,XM_011520366,XP_006718380,XP_006718381,XP_006718384,XP_011518668,XR_428848,XR_428851,XR_930896,XR_930897,XR_930898,XR_930899,XR_930900,XR_930901,XR_930902,XR_930903,XR_930904,XR_930905,XR_930906
ENSG00000133124	33.9835	1.63586	0.25873	6.32265	2.57117e-10	2.00392e-09	8471	1	8471	insulin receptor substrate 4	insulin receptor substrate 4	NM_003604	NM_003604,NP_003595,XM_005262220,XM_006724713,XM_011531061,XP_005262277,XP_006724776,XP_011529363
ENSG00000011347	226.015	1.63274	0.125533	13.0065	1.124e-38	3.1495e-37	9066	1	9066	synaptotagmin VII	synaptotagmin VII	NM_001252065	NM_001252065,NM_001300773,NM_004200,NP_001238994,NP_001287702,NP_004191,XM_005274383,XM_005274384,XM_005274385,XM_005274387,XM_005274390,XM_006718736,XM_011545335,XM_011545336,XM_011545337,XM_011545338,XM_011545339,XM_011545340,XM_011545341,XM_011545342,XM_011545343,XP_005274440,XP_005274441,XP_005274442,XP_005274444,XP_005274447,XP_006718799,XP_011543637,XP_011543638,XP_011543639,XP_011543640,XP…
ENSG00000136048	311.254	1.63145	0.106457	15.325	5.20651e-53	2.09667e-51	55332	1	55332	DNA-damage regulated autophagy modulator 1	DNA-damage regulated autophagy modulator 1	NM_018370	NM_018370,NP_060840,XM_005269004,XM_005269005,XM_011538536,XP_005269061,XP_005269062,XP_011536838
ENSG00000167733	102.549	1.63051	0.176249	9.25113	2.22124e-20	3.19817e-19	374875	1	374875	hydroxysteroid (11-beta) dehydrogenase 1-like	hydroxysteroid (11-beta) dehydrogenase 1-like	NM_001267868	NM_001267868,NM_001267869,NM_001267870,NM_001267871,NM_198533,NM_198704,NM_198705,NM_198706,NM_198707,NM_198708,NP_001254797,NP_001254798,NP_001254799,NP_001254800,NP_940935,NP_941993,NP_941994,NP_941995,NP_941996,NP_941997
ENSG00000168477	15.2029	1.62978	0.305691	5.33145	9.7434e-08	6.02289e-07	7148	1	7148	tenascin XB	tenascin XB	NM_019105	NM_019105,NM_032470,NP_061978,NP_115859
ENSG00000253159	23.1168	1.62895	0.288904	5.63836	1.71675e-08	1.13402e-07	26025	1	26025	protocadherin gamma subfamily A, 12	protocadherin gamma subfamily A, 12	NM_003735	NM_003735,NM_032094,NP_003726,NP_115265
ENSG00000176399	94.6247	1.6289	0.175661	9.27295	1.81068e-20	2.62157e-19	63951	1	63951	DMRT-like family A1	DMRT-like family A1	NM_022160	NM_022160,NP_071443
ENSG00000176988	6.16397	1.62805	0.305422	5.33051	9.79379e-08	6.05084e-07	158521	1	158521	fragile X mental retardation 1 neighbor	fragile X mental retardation 1 neighbor	NM_152578	NM_152578,NP_689791
ENSG00000169750	1080.04	1.62739	0.062046	26.2288	1.24777e-151	2.86216e-149	5881	1	5881	ras-related C3 botulinum toxin substrate 3 (rho family, small GTP binding protein Rac3)	ras-related C3 botulinum toxin substrate 3 (rho family, small GTP binding protein Rac3)	NM_005052	NM_005052,NP_005043,XM_005256390,XP_005256447
ENSG00000197465	14.5864	1.62376	0.307483	5.28083	1.28597e-07	7.85376e-07	2996	1	2996	glycophorin E (MNS blood group)	glycophorin E (MNS blood group)	NM_002102	NM_002102,NM_198682,NP_002093,NP_941391
ENSG00000118640	21.6744	1.62338	0.277242	5.85548	4.75622e-09	3.32282e-08	8673	1	8673	vesicle-associated membrane protein 8	vesicle-associated membrane protein 8	NM_003761	NM_003761,NP_003752
ENSG00000137699	20.652	1.61973	0.304011	5.32789	9.93621e-08	6.13073e-07	23650	1	23650	tripartite motif containing 29	tripartite motif containing 29	NM_012101	NM_012101,NM_058193,NP_036233,XM_005271490,XM_011542729,XM_011542730,XM_011542731,XM_011542732,XM_011542733,XP_005271547,XP_011541031,XP_011541032,XP_011541033,XP_011541034,XP_011541035
ENSG00000256806	15.9847	1.61869	0.300595	5.38497	7.24586e-08	4.53293e-07	NA	0	NA	NA	NA	NA	NA
ENSG00000090539	97.8578	1.61864	0.171251	9.45185	3.32883e-21	4.98941e-20	8646	1	8646	chordin	chordin	NM_001304472	NM_001304472,NM_001304473,NM_001304474,NM_003741,NM_177978,NM_177979,NP_001291401,NP_001291402,NP_001291403,NP_003732,NR_130747,XM_011513254,XM_011513255,XM_011513256,XP_011511556,XP_011511557,XP_011511558,XR_924203
ENSG00000150722	27.635	1.61745	0.278429	5.80921	6.27695e-09	4.33093e-08	151242	1	151242	protein phosphatase 1, regulatory (inhibitor) subunit 1C	protein phosphatase 1, regulatory (inhibitor) subunit 1C	NM_001080545	NM_001080545,NM_001261424,NM_001261425,NP_001074014,NP_001248353,NP_001248354,NR_048566,NR_048567
ENSG00000080644	120.806	1.61741	0.168668	9.58934	8.86536e-22	1.36283e-20	1136	1	1136	cholinergic receptor, nicotinic, alpha 3 (neuronal)	cholinergic receptor, nicotinic, alpha 3 (neuronal)	NM_000743	NM_000743,NM_001166694,NP_000734,NP_001160166,NR_046313,XM_006720382,XM_011521173,XP_006720445,XP_011519475
ENSG00000175274	382.728	1.61677	0.110319	14.6555	1.24307e-48	4.54441e-47	9537	1	9537	tumor protein p53 inducible protein 11	tumor protein p53 inducible protein 11	NM_001076787	NM_001076787,NM_001258320,NM_001258321,NM_001258322,NM_001258323,NM_001258324,NM_006034,NP_001245249,NP_001245250,NP_001245251,NP_001245252,NP_001245253,NP_006025,XM_005253227,XM_005253229,XM_011520475,XM_011520476,XM_011520477,XM_011520478,XM_011520479,XM_011520480,XM_011520481,XP_005253284,XP_005253286,XP_011518777,XP_011518778,XP_011518779,XP_011518780,XP_011518781,XP_011518782,XP_011518783,XR…
ENSG00000154134	121.712	1.61647	0.163424	9.89124	4.54375e-23	7.42389e-22	64221	1	64221	roundabout guidance receptor 3	roundabout guidance receptor 3	NM_022370	NM_022370,NP_071765,XM_011542953,XP_011541255
ENSG00000188338	42.2773	1.61597	0.243221	6.64401	3.05254e-11	2.55712e-10	10991	1	10991	solute carrier family 38, member 3	solute carrier family 38, member 3	NM_006841	NM_006841,NP_006832,XM_006712954,XP_006713017
ENSG00000177106	98.9561	1.61476	0.173478	9.30819	1.30032e-20	1.89792e-19	64787	1	64787	EPS8-like 2	EPS8-like 2	NM_022772	NM_022772,NP_073609
ENSG00000138311	57.7983	1.61456	0.222508	7.25619	3.98145e-13	3.84141e-12	22891	1	22891	zinc finger protein 365	zinc finger protein 365	NM_014951	NM_014951,NM_199450,NM_199451,NM_199452,NP_055766,NP_955522,NP_955523,NP_955524,XM_011539530,XM_011539531,XM_011539532,XM_011539533,XP_011537832,XP_011537833,XP_011537834,XP_011537835
ENSG00000166446	35.4035	1.61438	0.246658	6.54499	5.94988e-11	4.87599e-10	124359	1	124359	chromodomain protein, Y-like 2	chromodomain protein, Y-like 2	NM_152342	NM_152342,NP_689555,XM_011522866,XM_011522867,XM_011522868,XP_011521168,XP_011521169,XP_011521170
ENSG00000171169	468.951	1.61362	0.0976932	16.5172	2.7572e-61	1.33286e-59	203245	1	203245	nuclear apoptosis inducing factor 1	nuclear apoptosis inducing factor 1	NM_197956	NM_197956,NP_931045,XR_242574,XR_428519
ENSG00000125637	11.3212	1.61304	0.308718	5.22496	1.74195e-07	1.04772e-06	23550	1	23550	pleckstrin and Sec7 domain containing 4	pleckstrin and Sec7 domain containing 4	NM_012455	NM_012455,NP_036587,XM_005263634,XM_006712392,XM_006712393,XM_006712394,XM_011510888,XM_011510889,XP_005263691,XP_006712455,XP_006712456,XP_006712457,XP_011509190,XP_011509191
ENSG00000254349	14.5316	1.61243	0.305455	5.27879	1.30037e-07	7.93756e-07	441355	1	441355	MIR2052 host gene	MIR2052 host gene	NR_033830	NR_033830
ENSG00000119630	112.289	1.61196	0.162206	9.93778	2.85124e-23	4.70123e-22	5228	1	5228	placental growth factor	placental growth factor	NM_001207012	NM_001207012,NM_001293643,NM_002632,NP_001193941,NP_001280572,NP_002623
ENSG00000256633	13.447	1.61194	0.30891	5.21816	1.80711e-07	1.08468e-06	NA	0	NA	NA	NA	NA	NA
ENSG00000152969	11.3737	1.61166	0.310204	5.19551	2.04164e-07	1.21672e-06	152789	1	152789	janus kinase and microtubule interacting protein 1	janus kinase and microtubule interacting protein 1	NM_001099433	NM_001099433,NM_001306133,NM_001306134,NM_144720,NP_001092903,NP_001293062,NP_001293063,NP_653321,XM_011513399,XM_011513400,XM_011513401,XP_011511701,XP_011511702,XP_011511703
ENSG00000163817	14.4608	1.61066	0.308776	5.21627	1.82566e-07	1.09385e-06	54716	1	54716	solute carrier family 6 (proline IMINO transporter), member 20	solute carrier family 6 (proline IMINO transporter), member 20	NM_020208	NM_020208,NM_022405,NP_064593,NP_071800,XM_005265236,XM_011533847,XM_011533848,XP_005265293,XP_011532149,XP_011532150
ENSG00000213185	14.1912	1.60881	0.308359	5.21733	1.81518e-07	1.08869e-06	196792	1	196792	family with sequence similarity 24, member B	family with sequence similarity 24, member B	NM_001204364	NM_001204364,NM_152644,NP_001191293,NP_689857,NR_037911
ENSG00000206535	169.81	1.6064	0.140125	11.4641	1.99908e-30	4.29106e-29	348801	1	348801	leukemia NUP98 fusion partner 1	leukemia NUP98 fusion partner 1	NM_001085451	NM_001085451,NP_001078920
ENSG00000226141	10.8065	1.60585	0.310079	5.17885	2.23262e-07	1.32547e-06	NA	0	NA	NA	NA	NA	NA
ENSG00000175352	283.519	1.60519	0.111221	14.4324	3.23505e-47	1.12635e-45	56675	1	56675	nuclear receptor interacting protein 3	nuclear receptor interacting protein 3	NM_020645	NM_020645,NP_065696,XM_011520221,XP_011518523
ENSG00000137094	143.264	1.60257	0.144607	11.0822	1.53049e-28	3.07109e-27	25822	1	25822	DnaJ (Hsp40) homolog, subfamily B, member 5	DnaJ (Hsp40) homolog, subfamily B, member 5	NM_001135004	NM_001135004,NM_001135005,NM_012266,NP_001128476,NP_001128477,NP_036398,XM_005251428,XM_006716751,XM_011517842,XP_005251485,XP_006716814,XP_011516144
ENSG00000144596	20.5345	1.60051	0.287339	5.57012	2.54557e-08	1.65754e-07	80852	1	80852	glutamate receptor interacting protein 2	glutamate receptor interacting protein 2	NM_001080423	NM_001080423,NP_001073892,XM_011534141,XM_011534142,XM_011534143,XM_011534144,XM_011534145,XM_011534146,XP_011532443,XP_011532444,XP_011532445,XP_011532446,XP_011532447,XP_011532448,XR_940504
ENSG00000224189	115.296	1.6002	0.174044	9.19423	3.77687e-20	5.38169e-19	401022	1	401022	HOXD antisense growth-associated long non-coding RNA	HOXD antisense growth-associated long non-coding RNA	NR_033979	NR_033979,NR_110458,NR_110459,NR_110460,NR_110461,NR_110462,NR_110463,NR_110464,NR_110465,NR_110466,NR_110467,NR_110468
ENSG00000270641	5.99045	1.59985	0.305342	5.23953	1.60986e-07	9.72778e-07	9383	1	9383	TSIX transcript, XIST antisense RNA	TSIX transcript, XIST antisense RNA	NR_003255	NR_003255
ENSG00000197587	99.1705	1.59759	0.176878	9.03214	1.68346e-19	2.31967e-18	127343	1	127343	diencephalon/mesencephalon homeobox 1	diencephalon/mesencephalon homeobox 1	NM_147192	NM_147192,NM_172225,NP_671725,NP_757379,XM_011540667,XM_011540668,XM_011540669,XM_011540670,XP_011538969,XP_011538970,XP_011538971,XP_011538972
ENSG00000141738	9.57533	1.59417	0.310445	5.13511	2.81986e-07	1.65686e-06	2886	1	2886	growth factor receptor-bound protein 7	growth factor receptor-bound protein 7	NM_001030002	NM_001030002,NM_001242442,NM_001242443,NM_005310,NP_001025173,NP_001229371,NP_001229372,NP_005301,XM_011524683,XP_011522985
ENSG00000273388	6.48731	1.59394	0.306825	5.19494	2.04788e-07	1.21982e-06	NA	0	NA	NA	NA	NA	NA
ENSG00000177685	109.038	1.59335	0.170404	9.35041	8.731e-21	1.28478e-19	283229	1	283229	calcium release activated channel regulator 2B	calcium release activated channel regulator 2B	NM_001286606	NM_001286606,NM_173584,NP_001273535,NP_775855,XM_006718203,XM_006718205,XM_011520011,XM_011520012,XM_011520013,XM_011520014,XM_011520015,XM_011520016,XM_011520017,XM_011520018,XM_011520019,XM_011520020,XM_011520021,XM_011520022,XM_011520023,XM_011520024,XP_006718266,XP_006718268,XP_011518313,XP_011518314,XP_011518315,XP_011518316,XP_011518317,XP_011518318,XP_011518319,XP_011518320,XP_011518321,XP…
ENSG00000160219	73.82	1.59206	0.206548	7.70792	1.27884e-14	1.36315e-13	139716	1	139716	GRB2-associated binding protein 3	GRB2-associated binding protein 3	NM_001081573	NM_001081573,NM_001282283,NM_080612,NP_001075042,NP_001269212,NP_542179,NR_104114,XM_005274648,XM_006724804,XM_006724806,XM_011531103,XM_011531104,XM_011531105,XM_011531106,XP_005274705,XP_006724867,XP_006724869,XP_011529405,XP_011529406,XP_011529407,XP_011529408,XR_938505
ENSG00000134202	177.544	1.59117	0.136996	11.6147	3.46987e-31	7.68792e-30	2947	1	2947	glutathione S-transferase mu 3 (brain)	glutathione S-transferase mu 3 (brain)	NM_000849	NM_000849,NP_000840,NR_024537,XM_011541296,XP_011539598
ENSG00000133636	7.84802	1.59014	0.309476	5.13817	2.7743e-07	1.63288e-06	4922	1	4922	neurotensin	neurotensin	NM_006183	NM_006183,NP_006174
ENSG00000152527	106.514	1.58988	0.188002	8.45674	2.7496e-17	3.39306e-16	130271	1	130271	pleckstrin homology domain containing, family H (with MyTH4 domain) member 2	pleckstrin homology domain containing, family H (with MyTH4 domain) member 2	NM_172069	NM_172069,NP_742066,XM_011532539,XP_011530841,XR_244924,XR_426981,XR_939656,XR_939657
ENSG00000175879	203.99	1.58904	0.131816	12.055	1.82442e-33	4.37804e-32	3234	1	3234	homeobox D8	homeobox D8	NM_001199746	NM_001199746,NM_001199747,NM_019558,NP_001186675,NP_001186676,NP_062458
ENSG00000104848	10.2994	1.58717	0.310461	5.11231	3.18244e-07	1.8587e-06	3743	1	3743	potassium channel, voltage gated shaker related subfamily A, member 7	potassium channel, voltage gated shaker related subfamily A, member 7	NM_031886	NM_031886,NP_114092
ENSG00000146910	105.383	1.58684	0.174942	9.07067	1.18292e-19	1.64547e-18	285888	1	285888	canopy FGF signaling regulator 1	canopy FGF signaling regulator 1	NM_001103176	NM_001103176,NP_001096646
ENSG00000140015	56.4988	1.5863	0.215598	7.35766	1.87169e-13	1.85088e-12	27133	1	27133	potassium channel, voltage gated eag related subfamily H, member 5	potassium channel, voltage gated eag related subfamily H, member 5	NM_139318	NM_139318,NM_172375,NM_172376,NP_647479,NP_758963,XM_011536658,XP_011534960
ENSG00000162482	22.477	1.58365	0.272734	5.80657	6.37642e-09	4.39696e-08	22977	1	22977	aldo-keto reductase family 7, member A3 (aflatoxin aldehyde reductase)	aldo-keto reductase family 7, member A3 (aflatoxin aldehyde reductase)	NM_012067	NM_012067,NP_036199,XM_011541046,XM_011541047,XP_011539348,XP_011539349
ENSG00000185507	87.4433	1.58184	0.184235	8.58598	9.00622e-18	1.13534e-16	3665	1	3665	interferon regulatory factor 7	interferon regulatory factor 7	NM_001572	NM_001572,NM_004029,NM_004030,NM_004031,NP_001563,NP_004020,NP_004022,XM_005252906,XM_005252907,XM_005252908,XM_005252909,XM_006725137,XM_006725138,XM_006725139,XM_011520066,XP_005252963,XP_005252964,XP_005252965,XP_005252966,XP_006725200,XP_006725201,XP_006725202,XP_011518368
ENSG00000104419	46.774	1.5818	0.227827	6.943	3.83848e-12	3.44325e-11	10397	1	10397	N-myc downstream regulated 1	N-myc downstream regulated 1	NM_001135242	NM_001135242,NM_001258432,NM_001258433,NM_006096,NP_001128714,NP_001245361,NP_001245362,NP_006087,XM_011516791,XM_011516792,XP_011515093,XP_011515094
ENSG00000266885	24.8536	1.58142	0.302583	5.2264	1.72839e-07	1.04051e-06	NA	0	NA	NA	NA	NA	NA
ENSG00000214719	22.3695	1.57928	0.284181	5.55732	2.73949e-08	1.77896e-07	NA	0	NA	NA	NA	NA	NA
ENSG00000142319	49.6255	1.57833	0.227067	6.95091	3.62926e-12	3.26968e-11	6531	1	6531	solute carrier family 6 (neurotransmitter transporter), member 3	solute carrier family 6 (neurotransmitter transporter), member 3	NM_001044	NM_001044,NP_001035
ENSG00000156150	16.0997	1.57719	0.307128	5.13528	2.81718e-07	1.65592e-06	257	1	257	ALX homeobox 3	ALX homeobox 3	NM_006492	NM_006492,NP_006483
ENSG00000155657	26.1564	1.57384	0.280677	5.60729	2.05521e-08	1.34657e-07	7273	1	7273	titin	titin	NM_001256850	NM_001256850,NM_001267550,NM_003319,NM_133378,NM_133379,NM_133432,NM_133437,NP_001243779,NP_001254479,NP_003310,NP_596869,NP_596870,NP_597676,NP_597681,XM_011511729,XM_011511730,XM_011511731,XM_011511732,XP_011510031,XP_011510032,XP_011510033,XP_011510034
ENSG00000087258	433.259	1.57332	0.0978583	16.0775	3.66819e-58	1.64731e-56	2775	1	2775	guanine nucleotide binding protein (G protein), alpha activating activity polypeptide O	guanine nucleotide binding protein (G protein), alpha activating activity polypeptide O	NM_020988	NM_020988,NM_138736,NP_066268,NP_620073,XM_011523003,XP_011521305
ENSG00000112238	14.1506	1.57304	0.308403	5.10058	3.38611e-07	1.97295e-06	59336	1	59336	PR domain containing 13	PR domain containing 13	NM_021620	NM_021620,NP_067633
ENSG00000261659	27.4524	1.5727	0.273482	5.75066	8.88932e-09	6.03726e-08	NA	0	NA	NA	NA	NA	NA
ENSG00000162374	10.2727	1.56891	0.310403	5.05443	4.3168e-07	2.48891e-06	1996	1	1996	ELAV like neuron-specific RNA binding protein 4	ELAV like neuron-specific RNA binding protein 4	NM_001144774	NM_001144774,NM_001144775,NM_001144776,NM_001144777,NM_001294348,NM_021952,NP_001138246,NP_001138247,NP_001138248,NP_001138249,NP_001281277,NP_068771,XM_006710411,XM_006710412,XM_006710414,XM_011540889,XM_011540890,XM_011540891,XM_011540892,XM_011540893,XM_011540894,XM_011540895,XM_011540896,XP_006710474,XP_006710475,XP_006710477,XP_011539191,XP_011539192,XP_011539193,XP_011539194,XP_011539195,XP…
ENSG00000253520	18.822	1.5685	0.296534	5.28944	1.22688e-07	7.51254e-07	NA	0	NA	NA	NA	NA	NA
ENSG00000225210	15.593	1.56739	0.30415	5.15335	2.55869e-07	1.511e-06	503639	1	503639	double homeobox A pseudogene 10	double homeobox A pseudogene 10	NM_001013701	NM_001013701,NR_110526
ENSG00000158458	43.3097	1.56657	0.233102	6.72056	1.81032e-11	1.53966e-10	9542	1	9542	neuregulin 2	neuregulin 2	NM_001184935	NM_001184935,NM_004883,NM_013981,NM_013982,NM_013983,NM_013984,NM_013985,NP_001171864,NP_004874,NP_053584,NP_053585,NP_053586,XM_005268533,XM_006714808,XM_006714810,XM_011537710,XM_011537711,XM_011537712,XM_011537713,XP_005268590,XP_006714871,XP_006714873,XP_011536012,XP_011536013,XP_011536014,XP_011536015,XR_944342
ENSG00000127084	46.2079	1.5663	0.23626	6.62957	3.36676e-11	2.81329e-10	89846	1	89846	FYVE, RhoGEF and PH domain containing 3	FYVE, RhoGEF and PH domain containing 3	NM_001083536	NM_001083536,NM_001286993,NM_033086,NP_001077005,NP_001273922,NP_149077,XR_242605
ENSG00000255042	33.2815	1.56565	0.299047	5.23547	1.64565e-07	9.93123e-07	NA	0	NA	NA	NA	NA	NA
ENSG00000250874	13.9672	1.56554	0.306934	5.10056	3.38648e-07	1.97295e-06	NA	0	NA	NA	NA	NA	NA
ENSG00000166961	8.26462	1.5648	0.309863	5.04999	4.41827e-07	2.54366e-06	219995	1	219995	membrane-spanning 4-domains, subfamily A, member 15	membrane-spanning 4-domains, subfamily A, member 15	NM_001098835	NM_001098835,NM_001278242,NM_152717,NP_001092305,NP_001265171,NP_689930,NR_103481,XM_006718458,XM_006718459,XM_011544812,XM_011544813,XM_011544814,XP_006718521,XP_006718522,XP_011543114,XP_011543115,XP_011543116
ENSG00000172350	38.473	1.5633	0.256093	6.10441	1.03178e-09	7.63942e-09	64137	1	64137	ATP-binding cassette, sub-family G (WHITE), member 4	ATP-binding cassette, sub-family G (WHITE), member 4	NM_001142505	NM_001142505,NM_022169,NP_001135977,NP_071452,XM_011542952,XP_011541254
ENSG00000163347	271.322	1.56193	0.113353	13.7793	3.39468e-43	1.06898e-41	9076	1	9076	claudin 1	claudin 1	NM_021101	NM_021101,NP_066924
ENSG00000078725	8.26872	1.56149	0.309644	5.04286	4.58626e-07	2.63454e-06	1620	1	1620	bone morphogenetic protein/retinoic acid inducible neural-specific 1	bone morphogenetic protein/retinoic acid inducible neural-specific 1	NM_014618	NM_014618,NP_055433
ENSG00000274525	10.8646	1.56092	0.310081	5.03392	4.80539e-07	2.75433e-06	NA	0	NA	NA	NA	NA	NA
ENSG00000118004	88.6606	1.56062	0.180315	8.655	4.92897e-18	6.30871e-17	78989	1	78989	collectin sub-family member 11	collectin sub-family member 11	NM_001255982	NM_001255982,NM_001255983,NM_001255984,NM_001255985,NM_001255986,NM_001255987,NM_001255988,NM_001255989,NM_024027,NM_199235,NP_001242911,NP_001242912,NP_001242913,NP_001242914,NP_001242915,NP_001242916,NP_001242917,NP_001242918,NP_076932,NP_954705,NR_045659,XM_005263853,XM_006711897,XP_005263910,XP_006711960
ENSG00000179909	22.1352	1.56014	0.289545	5.38826	7.11448e-08	4.45192e-07	7710	1	7710	zinc finger protein 154	zinc finger protein 154	NM_001085384	NM_001085384,NM_003444,NP_001078853,NR_110974,NR_110975
ENSG00000164651	224.981	1.55978	0.128029	12.183	3.82838e-34	9.40888e-33	221833	1	221833	Sp8 transcription factor	Sp8 transcription factor	NM_182700	NM_182700,NM_198956,NP_874359,NP_945194,XM_011515176,XP_011513478
ENSG00000141750	237.231	1.55871	0.118292	13.1768	1.19332e-39	3.42999e-38	342667	1	342667	SH3 and cysteine rich domain 2	SH3 and cysteine rich domain 2	NM_198993	NM_198993,NP_945344
ENSG00000100473	1335.44	1.55824	0.0583156	26.7209	2.69225e-157	6.6306e-155	1690	1	1690	cochlin	cochlin	NM_001135058	NM_001135058,NM_004086,NP_001128530,NP_004077,XM_011536539,XP_011534841
ENSG00000225465	10.7721	1.55801	0.310188	5.02278	5.09291e-07	2.91128e-06	NA	0	NA	NA	NA	NA	NA
ENSG00000074416	29.4891	1.55721	0.275512	5.65204	1.58557e-08	1.05122e-07	11343	1	11343	monoglyceride lipase	monoglyceride lipase	NM_001003794	NM_001003794,NM_001256585,NM_007283,NP_001003794,NP_001243514,NP_009214,XM_011512377,XM_011512378,XM_011512379,XM_011512380,XM_011512381,XM_011512382,XM_011512383,XP_011510679,XP_011510680,XP_011510681,XP_011510682,XP_011510683,XP_011510684,XP_011510685
ENSG00000100721	12.3143	1.55714	0.309719	5.02759	4.96686e-07	2.84201e-06	8115	1	8115	T-cell leukemia/lymphoma 1A	T-cell leukemia/lymphoma 1A	NM_001098725	NM_001098725,NM_021966,NP_001092195,NP_068801,NR_049726
ENSG00000143878	625.356	1.55552	0.0789054	19.7137	1.64518e-86	1.34588e-84	388	1	388	ras homolog family member B	ras homolog family member B	NM_004040	NM_004040,NP_004031
ENSG00000134954	505.852	1.55312	0.0904842	17.1646	4.89239e-66	2.61341e-64	2113	1	2113	v-ets avian erythroblastosis virus E26 oncogene homolog 1	v-ets avian erythroblastosis virus E26 oncogene homolog 1	NM_001143820	NM_001143820,NM_001162422,NM_005238,NP_001137292,NP_001155894,NP_005229,XM_011542649,XM_011542650,XM_011542651,XM_011542652,XP_011540951,XP_011540952,XP_011540953,XP_011540954
ENSG00000142549	9.27365	1.55072	0.310315	4.99723	5.81594e-07	3.3012e-06	402665	1	402665	IgLON family member 5	IgLON family member 5	NM_001101372	NM_001101372,NP_001094842
ENSG00000266830	18.3756	1.54768	0.297855	5.1961	2.03513e-07	1.21315e-06	NA	0	NA	NA	NA	NA	NA
ENSG00000258128	5.31065	1.54552	0.301895	5.11938	3.06544e-07	1.79665e-06	NA	0	NA	NA	NA	NA	NA
ENSG00000166183	9.83158	1.54376	0.31026	4.97569	6.50153e-07	3.66899e-06	374569	1	374569	asparaginase	asparaginase	NM_001080464	NM_001080464,NP_001073933,XM_005267590,XM_006720132,XM_011536737,XM_011536738,XM_011536739,XM_011536740,XP_005267647,XP_006720195,XP_011535039,XP_011535040,XP_011535041,XP_011535042,XR_943428
ENSG00000187721	12.4777	1.54282	0.310571	4.96767	6.77616e-07	3.81661e-06	NA	0	NA	NA	NA	NA	NA
ENSG00000164929	44.208	1.54266	0.2397	6.43581	1.22817e-10	9.85108e-10	79870	1	79870	brain and acute leukemia, cytoplasmic	brain and acute leukemia, cytoplasmic	NM_001024372	NM_001024372,NM_024812,NP_001019543,NP_079088
ENSG00000106113	7.25502	1.5414	0.30871	4.99304	5.94376e-07	3.36885e-06	1395	1	1395	corticotropin releasing hormone receptor 2	corticotropin releasing hormone receptor 2	NM_001202475	NM_001202475,NM_001202481,NM_001202482,NM_001202483,NM_001883,NP_001189404,NP_001189410,NP_001189411,NP_001189412,NP_001874,XM_011515127,XM_011515128,XM_011515129,XP_011513429,XP_011513430,XP_011513431
ENSG00000213445	365.068	1.54129	0.100857	15.282	1.00824e-52	4.02556e-51	6494	1	6494	signal-induced proliferation-associated 1	signal-induced proliferation-associated 1	NM_006747	NM_006747,NM_153253,NP_006738,NP_694985,XM_005274189,XM_011545214,XM_011545215,XP_005274246,XP_011543516,XP_011543517,XR_247210,XR_950017
ENSG00000166401	64.0564	1.54079	0.205717	7.48987	6.89443e-14	7.02872e-13	5271	1	5271	serpin peptidase inhibitor, clade B (ovalbumin), member 8	serpin peptidase inhibitor, clade B (ovalbumin), member 8	NM_001031848	NM_001031848,NM_001276490,NM_002640,NM_198833,NP_001027018,NP_001263419,NP_002631,NP_942130,XM_006722484,XM_011526025,XP_006722547,XP_011524327
ENSG00000141376	195.182	1.53909	0.140143	10.9823	4.64966e-28	9.20372e-27	54828	1	54828	breast carcinoma amplified sequence 3	breast carcinoma amplified sequence 3	NM_001099432	NM_001099432,NM_017679,NP_001092902,NP_060149,XM_005257472,XM_005257475,XM_011524939,XM_011524940,XM_011524941,XM_011524942,XM_011524943,XM_011524944,XM_011524945,XM_011524946,XM_011524947,XM_011524948,XM_011524949,XM_011524950,XM_011524951,XM_011524952,XP_005257529,XP_005257532,XP_011523241,XP_011523242,XP_011523243,XP_011523244,XP_011523245,XP_011523246,XP_011523247,XP_011523248,XP_011523249,XP…
ENSG00000197705	113.437	1.53908	0.165189	9.31708	1.19584e-20	1.74869e-19	57565	1	57565	kelch-like family member 14	kelch-like family member 14	NM_020805	NM_020805,NP_065856,XM_011526108,XM_011526109,XP_011524410,XP_011524411
ENSG00000162706	8.24686	1.53782	0.30899	4.97693	6.46015e-07	3.64652e-06	57863	1	57863	cell adhesion molecule 3	cell adhesion molecule 3	NM_001127173	NM_001127173,NM_021189,NP_001120645,NP_067012
ENSG00000177519	151.874	1.53743	0.149662	10.2726	9.3598e-25	1.64903e-23	56475	1	56475	reprimo, TP53 dependent G2 arrest mediator candidate	reprimo, TP53 dependent G2 arrest mediator candidate	NM_019845	NM_019845,NP_062819
ENSG00000183305	7.16275	1.53554	0.307608	4.99187	5.97967e-07	3.38838e-06	4101	2	4101266740	melanoma antigen family A2	melanoma antigen family A2	NM_001282501	NM_001282501,NM_001282502,NM_001282504,NM_001282505,NM_005361,NM_175742,NM_175743,NP_001269430,NP_001269431,NP_001269433,NP_001269434,NP_005352,NP_786884,NP_786885,XM_011531159,XP_011529461
ENSG00000005471	19.0803	1.53441	0.295041	5.20067	1.98576e-07	1.18553e-06	5244	1	5244	ATP-binding cassette, sub-family B (MDR/TAP), member 4	ATP-binding cassette, sub-family B (MDR/TAP), member 4	NM_000443	NM_000443,NM_018849,NM_018850,NP_000434,NP_061337,NP_061338,XM_011516308,XM_011516309,XM_011516310,XM_011516311,XM_011516312,XM_011516313,XM_011516314,XM_011516315,XP_011514610,XP_011514611,XP_011514612,XP_011514613,XP_011514614,XP_011514615,XP_011514616,XP_011514617,XR_927478
ENSG00000226476	13.4977	1.53278	0.309703	4.9492	7.45198e-07	4.18216e-06	NA	0	NA	NA	NA	NA	NA
ENSG00000161798	10.5396	1.5316	0.310419	4.93398	8.05715e-07	4.50665e-06	362	1	362	aquaporin 5	aquaporin 5	NM_001651	NM_001651,NP_001642,XM_005268838,XP_005268895
ENSG00000189064	5.37651	1.53011	0.299422	5.11022	3.21782e-07	1.87843e-06	2574	4	2.57427e+23	G antigen 2C	G antigen 2C	NM_001472	NM_001472,NP_001463
ENSG00000262267	8.64352	1.52869	0.310012	4.93107	8.17794e-07	4.56766e-06	NA	0	NA	NA	NA	NA	NA
ENSG00000253958	20.3042	1.52705	0.297552	5.13204	2.86623e-07	1.68369e-06	137075	1	137075	claudin 23	claudin 23	NM_194284	NM_194284,NP_919260
ENSG00000106013	10.7642	1.52671	0.31036	4.91914	8.69254e-07	4.83776e-06	56311	1	56311	ankyrin repeat domain 7	ankyrin repeat domain 7	NM_001077708	NM_001077708,NM_019644,NP_062618
ENSG00000170049	162.103	1.52602	0.146332	10.4285	1.83766e-25	3.33819e-24	9196	1	9196	potassium channel, voltage gated subfamily A regulatory beta subunit 3	potassium channel, voltage gated subfamily A regulatory beta subunit 3	NM_004732	NM_004732,NP_004723,XM_011524067,XM_011524068,XM_011524069,XP_011522369,XP_011522370,XP_011522371
ENSG00000054282	487.811	1.52507	0.09655	15.7957	3.33321e-56	1.45227e-54	10806	1	10806	serologically defined colon cancer antigen 8	serologically defined colon cancer antigen 8	NM_006642	NM_006642,NP_006633,XM_005273013,XM_005273018,XM_005273021,XM_005273022,XM_005273023,XM_006711727,XM_006711728,XM_006711729,XM_006724964,XM_006724965,XM_006724966,XM_006724967,XM_006724969,XM_006724970,XM_006724971,XM_006724973,XM_011544021,XM_011544022,XM_011544023,XM_011544024,XM_011544025,XM_011544026,XM_011544027,XM_011544028,XM_011544029,XM_011544030,XM_011546428,XM_011546429,XM_011546430,XM…
ENSG00000095370	10.3337	1.52464	0.310317	4.91317	8.96176e-07	4.9793e-06	10044	1	10044	SH2 domain containing 3C	SH2 domain containing 3C	NM_001142531	NM_001142531,NM_001142532,NM_001142533,NM_001142534,NM_001252334,NM_005489,NM_170600,NP_001136003,NP_001136004,NP_001136005,NP_001136006,NP_001239263,NP_005480,NP_733745,XM_005251639,XM_011518114,XM_011518115,XM_011518116,XM_011518117,XP_005251696,XP_011516416,XP_011516417,XP_011516418,XP_011516419
ENSG00000117600	37.793	1.52336	0.238459	6.38835	1.67685e-10	1.32545e-09	9890	1	9890	lipid phosphate phosphatase-related protein type 4	lipid phosphate phosphatase-related protein type 4	NM_001166252	NM_001166252,NM_014839,NP_001159724,NP_055654,XM_011542498,XP_011540800
ENSG00000092068	219.622	1.5227	0.133345	11.4193	3.34978e-30	7.12497e-29	23428	1	23428	solute carrier family 7 (amino acid transporter light chain, L system), member 8	solute carrier family 7 (amino acid transporter light chain, L system), member 8	NM_001267036	NM_001267036,NM_001267037,NM_012244,NM_182728,NP_001253965,NP_001253966,NP_036376,NP_877392,NR_049767
ENSG00000167619	59.4994	1.52232	0.221789	6.8638	6.70535e-12	5.89571e-11	284339	1	284339	transmembrane protein 145	transmembrane protein 145	NM_173633	NM_173633,NP_775904,XM_005258781,XM_011526791,XM_011526792,XP_005258838,XP_011525093,XP_011525094
ENSG00000136404	103.264	1.52163	0.168634	9.02326	1.82579e-19	2.51135e-18	53346	1	53346	transmembrane 6 superfamily member 1	transmembrane 6 superfamily member 1	NM_001144903	NM_001144903,NM_023003,NP_001138375,NP_075379,XM_011521679,XM_011521680,XP_011519981,XP_011519982,XR_429457,XR_931847,XR_931848
ENSG00000186395	356.838	1.52127	0.0988772	15.3855	2.04872e-53	8.35087e-52	3858	1	3858	keratin 10, type I	keratin 10, type I	NM_000421	NM_000421,NP_000412,XM_005257343,XP_005257400
ENSG00000164972	17.2837	1.52038	0.294022	5.17096	2.32891e-07	1.37983e-06	84688	1	84688	chromosome 9 open reading frame 24	chromosome 9 open reading frame 24	NM_001252195	NM_001252195,NM_032596,NM_147168,NM_147169,NP_001239124,NP_115985,NP_671697,NP_671698,XM_005251616,XM_005251618,XM_011518055,XP_005251673,XP_005251675,XP_011516357
ENSG00000206192	6.95806	1.51835	0.308352	4.92409	8.47545e-07	4.71919e-06	NA	0	NA	NA	NA	NA	NA
ENSG00000250133	17.8859	1.51725	0.293123	5.17617	2.26485e-07	1.34358e-06	100874364	1	100874364	HOXC cluster antisense RNA 2	HOXC cluster antisense RNA 2	NR_047505	NR_047505
ENSG00000135638	44.9461	1.51307	0.256991	5.88766	3.917e-09	2.75793e-08	2016	1	2016	empty spiracles homeobox 1	empty spiracles homeobox 1	NM_001040404	NM_001040404,NM_004097,NP_004088,XM_005264203,XM_011532695,XM_011532696,XM_011532697,XP_005264260,XP_011530997,XP_011530998,XP_011530999
ENSG00000138735	204.455	1.51077	0.131617	11.4785	1.69111e-30	3.65345e-29	8654	1	8654	phosphodiesterase 5A, cGMP-specific	phosphodiesterase 5A, cGMP-specific	NM_001083	NM_001083,NM_033430,NM_033437,NP_001074,NP_236914,NP_246273
ENSG00000137691	37.3573	1.51036	0.261242	5.78145	7.40592e-09	5.07101e-08	85016	1	85016	chromosome 11 open reading frame 70	chromosome 11 open reading frame 70	NM_001195005	NM_001195005,NM_032930,NP_001181934,NP_116319,XM_005271713,XM_006718929,XP_005271770,XP_006718992
ENSG00000213186	104.995	1.50648	0.183172	8.22438	1.96207e-16	2.29993e-15	286827	1	286827	tripartite motif containing 59	tripartite motif containing 59	NM_173084	NM_173084,NP_775107
ENSG00000158014	11.0698	1.50607	0.310404	4.85195	1.22251e-06	6.67363e-06	7780	1	7780	solute carrier family 30 (zinc transporter), member 2	solute carrier family 30 (zinc transporter), member 2	NM_001004434	NM_001004434,NM_032513,NP_001004434,NP_115902
ENSG00000166262	52.8784	1.50591	0.2261	6.66036	2.73149e-11	2.29474e-10	196951	1	196951	family with sequence similarity 227, member B	family with sequence similarity 227, member B	NM_152647	NM_152647,NP_689860,XM_005254213,XM_005254214,XM_005254215,XM_005254216,XM_005254219,XM_005254220,XM_006720423,XM_006720424,XM_006720426,XM_006720427,XM_011521318,XM_011521319,XM_011521320,XM_011521321,XM_011521322,XM_011521323,XM_011521324,XM_011521325,XM_011521326,XP_005254270,XP_005254271,XP_005254272,XP_005254273,XP_005254276,XP_005254277,XP_006720486,XP_006720487,XP_006720489,XP_006720490,XP…
ENSG00000177599	11.1265	1.50481	0.309275	4.8656	1.14109e-06	6.25397e-06	126069	1	126069	zinc finger protein 491	zinc finger protein 491	NM_152356	NM_152356,NP_689569,XM_005259730,XM_006722640,XM_011527677,XP_005259787,XP_006722703,XP_011525979
ENSG00000101282	13.2709	1.50463	0.308934	4.87041	1.1137e-06	6.11766e-06	343637	1	343637	R-spondin 4	R-spondin 4	NM_001029871	NM_001029871,NM_001040007,NP_001025042,NP_001035096,XM_011529232,XM_011529233,XP_011527534,XP_011527535,XR_937068,XR_937069
ENSG00000134326	37.5409	1.50201	0.261769	5.73792	9.58491e-09	6.4777e-08	129607	1	129607	cytidine monophosphate (UMP-CMP) kinase 2, mitochondrial	cytidine monophosphate (UMP-CMP) kinase 2, mitochondrial	NM_001256477	NM_001256477,NM_001256478,NM_207315,NP_001243406,NP_001243407,NP_997198,NR_046236,XR_922655,XR_922656
ENSG00000205978	244.594	1.49861	0.119516	12.5389	4.57023e-36	1.19876e-34	57523	1	57523	NYN domain and retroviral integrase containing	NYN domain and retroviral integrase containing	NM_025081	NM_025081,NP_079357,XM_011537016,XP_011535318
ENSG00000197380	99.2057	1.497	0.172004	8.70328	3.22437e-18	4.16339e-17	147906	1	147906	dishevelled-binding antagonist of beta-catenin 3	dishevelled-binding antagonist of beta-catenin 3	NM_001301046	NM_001301046,NM_145056,NP_001287975,NP_659493,XM_011526498,XM_011526499,XM_011526500,XP_011524800,XP_011524801,XP_011524802
ENSG00000159713	96.1532	1.49576	0.176949	8.45302	2.83873e-17	3.49935e-16	51673	1	51673	tubulin polymerization-promoting protein family member 3	tubulin polymerization-promoting protein family member 3	NM_015964	NM_015964,NM_016140,NP_057048,NP_057224
ENSG00000277182	14.7664	1.49549	0.303479	4.92782	8.31528e-07	4.63994e-06	100287808	1	100287808	uncharacterized LOC100287808	uncharacterized LOC100287808	XR_243698	XR_243698,XR_253668,XR_430805
ENSG00000164082	11.6756	1.4921	0.30826	4.84038	1.29593e-06	7.03666e-06	2912	1	2912	glutamate receptor, metabotropic 2	glutamate receptor, metabotropic 2	NM_000839	NM_000839,NM_001130063,NP_000830,NP_001123535,XM_011533635,XM_011533636,XM_011533637,XM_011533638,XM_011533639,XM_011533640,XM_011533641,XM_011533642,XM_011533643,XM_011533644,XM_011533645,XM_011533646,XM_011533647,XP_011531937,XP_011531938,XP_011531939,XP_011531940,XP_011531941,XP_011531942,XP_011531943,XP_011531944,XP_011531945,XP_011531946,XP_011531947,XP_011531948,XP_011531949,XR_940421
ENSG00000177108	15.3049	1.49046	0.298792	4.98828	6.092e-07	3.44953e-06	283576	1	283576	zinc finger, DHHC-type containing 22	zinc finger, DHHC-type containing 22	NM_174976	NM_174976,NP_777636,XM_006720119,XM_011536661,XM_011536662,XP_006720182,XP_011534963,XP_011534964
ENSG00000099251	9.18542	1.48909	0.31025	4.79964	1.58952e-06	8.55334e-06	158160	1	158160	hydroxysteroid (17-beta) dehydrogenase 7 pseudogene 2	hydroxysteroid (17-beta) dehydrogenase 7 pseudogene 2	NM_001031744	NM_001031744,NM_182829,NR_003086
ENSG00000007866	151.491	1.48888	0.145042	10.2652	1.01117e-24	1.77749e-23	7005	1	7005	TEA domain family member 3	TEA domain family member 3	NM_003214	NM_003214,NP_003205
ENSG00000127920	107.044	1.48888	0.169064	8.80658	1.29017e-18	1.69205e-17	2791	1	2791	guanine nucleotide binding protein (G protein), gamma 11	guanine nucleotide binding protein (G protein), gamma 11	NM_004126	NM_004126,NP_004117
ENSG00000248663	19.3243	1.48829	0.293258	5.07502	3.87452e-07	2.2422e-06	NA	0	NA	NA	NA	NA	NA
ENSG00000184719	8.29242	1.48761	0.309795	4.8019	1.57164e-06	8.46495e-06	55328	1	55328	renalase, FAD-dependent amine oxidase	renalase, FAD-dependent amine oxidase	NM_001031709	NM_001031709,NM_018363,NP_001026879,NP_060833,XM_005269946,XM_005269947,XM_005269948,XM_005269949,XM_005269950,XM_011539924,XM_011539925,XM_011539926,XM_011539927,XP_005270003,XP_005270004,XP_005270005,XP_005270006,XP_005270007,XP_011538226,XP_011538227,XP_011538228,XP_011538229
ENSG00000165568	18.2689	1.4867	0.304967	4.87495	1.08836e-06	5.98882e-06	83592	1	83592	aldo-keto reductase family 1, member E2	aldo-keto reductase family 1, member E2	NM_001040177	NM_001040177,NM_001271021,NM_001271025,NM_031436,NP_001035267,NP_001257950,NP_001257954,NR_073125,NR_073126,NR_073127,XM_006717514,XM_011519715,XM_011519716,XM_011519717,XM_011519718,XM_011519719,XM_011519720,XM_011519721,XM_011519722,XM_011519723,XM_011519724,XM_011519725,XM_011519726,XM_011519727,XM_011519728,XM_011519729,XP_006717577,XP_011518017,XP_011518018,XP_011518019,XP_011518020,XP_01151…
ENSG00000119699	170.77	1.48435	0.134677	11.0216	3.00636e-28	5.98636e-27	7043	1	7043	transforming growth factor, beta 3	transforming growth factor, beta 3	NM_003239	NM_003239,NP_003230,XM_005268028,XP_005268085
ENSG00000108511	140.781	1.48366	0.15645	9.48326	2.46449e-21	3.71531e-20	3216	1	3216	homeobox B6	homeobox B6	NM_018952	NM_018952,NM_156036,NM_156037,NP_061825,XM_005257283,XM_005257284,XM_005257285,XM_006721856,XM_011524727,XP_005257340,XP_005257341,XP_005257342,XP_006721919,XP_011523029
ENSG00000161405	7.11754	1.48161	0.308658	4.80017	1.58533e-06	8.53671e-06	22806	1	22806	IKAROS family zinc finger 3 (Aiolos)	IKAROS family zinc finger 3 (Aiolos)	NM_001257408	NM_001257408,NM_001257409,NM_001257410,NM_001257411,NM_001257412,NM_001257413,NM_001257414,NM_001284514,NM_001284515,NM_001284516,NM_012481,NM_183228,NM_183229,NM_183230,NM_183231,NM_183232,NP_001244337,NP_001244338,NP_001244339,NP_001244340,NP_001244341,NP_001244342,NP_001244343,NP_001271443,NP_001271444,NP_001271445,NP_036613,NP_899051,NP_899052,NP_899053,NP_899054,NP_899055
ENSG00000149654	8.43784	1.48071	0.310361	4.77094	1.83364e-06	9.79492e-06	64405	1	64405	cadherin 22, type 2	cadherin 22, type 2	NM_021248	NM_021248,NP_067071,XM_006723858,XM_011528993,XM_011528994,XM_011528995,XP_006723921,XP_011527295,XP_011527296,XP_011527297
ENSG00000205246	32.5151	1.47919	0.251482	5.88186	4.05675e-09	2.85118e-08	NA	0	NA	NA	NA	NA	NA
ENSG00000250546	15.6187	1.47851	0.308946	4.78566	1.70427e-06	9.13305e-06	101928978	1	101928978	uncharacterized LOC101928978	uncharacterized LOC101928978	NR_125909	NR_125909
ENSG00000186354	6.80938	1.47834	0.307606	4.80594	1.54024e-06	8.30539e-06	286223	1	286223	chromosome 9 open reading frame 47	chromosome 9 open reading frame 47	NM_001001938	NM_001001938,NM_001142413,NP_001001938,NP_001135885
ENSG00000180535	7.95349	1.47804	0.309479	4.7759	1.78903e-06	9.56315e-06	168620	1	168620	basic helix-loop-helix family, member a15	basic helix-loop-helix family, member a15	NM_177455	NM_177455,NP_803238
ENSG00000265666	5.05055	1.47733	0.298389	4.95101	7.38306e-07	4.14546e-06	101929693	1	101929693	RARA antisense RNA 1	RARA antisense RNA 1	NR_110861	NR_110861
ENSG00000174473	47.963	1.47727	0.228847	6.45529	1.08009e-10	8.69906e-10	442117	1	442117	polypeptide N-acetylgalactosaminyltransferase-like 6	polypeptide N-acetylgalactosaminyltransferase-like 6	NM_001034845	NM_001034845,NP_001030017,XM_011531993,XM_011531994,XM_011531995,XM_011531996,XM_011531997,XM_011531998,XM_011531999,XM_011532000,XP_011530295,XP_011530296,XP_011530297,XP_011530298,XP_011530299,XP_011530300,XP_011530301,XP_011530302
ENSG00000277287	35.509	1.47682	0.240158	6.14937	7.77916e-10	5.82243e-09	NA	0	NA	NA	NA	NA	NA
ENSG00000248498	13.6289	1.47401	0.309813	4.75772	1.95788e-06	1.04158e-05	NA	0	NA	NA	NA	NA	NA
ENSG00000134245	122.004	1.47166	0.163459	9.00323	2.19182e-19	2.99544e-18	7482	1	7482	wingless-type MMTV integration site family, member 2B	wingless-type MMTV integration site family, member 2B	NM_001291880	NM_001291880,NM_004185,NM_024494,NP_001278809,NP_004176,NP_078613
ENSG00000006740	204.924	1.47054	0.121199	12.1332	7.04077e-34	1.71418e-32	9912	1	9912	Rho GTPase activating protein 44	Rho GTPase activating protein 44	NM_014859	NM_014859,NP_055674,XM_005256888,XM_005256889,XM_005256890,XM_005256891,XM_006721615,XP_005256945,XP_005256946,XP_005256947,XP_005256948,XP_006721678
ENSG00000112164	38.3528	1.47047	0.251341	5.85048	4.90143e-09	3.4212e-08	2740	1	2740	glucagon-like peptide 1 receptor	glucagon-like peptide 1 receptor	NM_002062	NM_002062,NP_002053,XR_926153,XR_926154,XR_926155
ENSG00000171121	17.0213	1.47044	0.307014	4.78949	1.67209e-06	8.97084e-06	27094	1	27094	potassium channel subfamily M regulatory beta subunit 3	potassium channel subfamily M regulatory beta subunit 3	NM_001163677	NM_001163677,NM_014407,NM_171828,NM_171829,NM_171830,NP_001157149,NP_055222,NP_741979,NP_741980,NP_741981,NR_028135
ENSG00000162591	34.0986	1.46918	0.250499	5.865	4.49143e-09	3.14629e-08	1953	1	1953	multiple EGF-like-domains 6	multiple EGF-like-domains 6	NM_001409	NM_001409,NP_001400,XM_006710406,XM_011540885,XM_011540886,XM_011540887,XM_011540888,XP_006710469,XP_011539187,XP_011539188,XP_011539189,XP_011539190
ENSG00000196189	28.1471	1.46802	0.277204	5.29579	1.18505e-07	7.27161e-07	64218	1	64218	sema domain, immunoglobulin domain (Ig), transmembrane domain (TM) and short cytoplasmic domain, (semaphorin) 4A	sema domain, immunoglobulin domain (Ig), transmembrane domain (TM) and short cytoplasmic domain, (semaphorin) 4A	NM_001193300	NM_001193300,NM_001193301,NM_001193302,NM_022367,NP_001180229,NP_001180230,NP_001180231,NP_071762,XM_011509871,XM_011509872,XM_011509873,XM_011509874,XM_011509875,XM_011509876,XM_011509877,XM_011509878,XM_011509879,XP_011508173,XP_011508174,XP_011508175,XP_011508176,XP_011508177,XP_011508178,XP_011508179,XP_011508180,XP_011508181
ENSG00000088882	392.658	1.46691	0.095342	15.3858	2.03847e-53	8.32359e-52	56265	1	56265	carboxypeptidase X (M14 family), member 1	carboxypeptidase X (M14 family), member 1	NM_001184699	NM_001184699,NM_019609,NP_001171628,NP_062555
ENSG00000132205	10.7632	1.46418	0.308503	4.74607	2.07408e-06	1.10039e-05	84034	1	84034	elastin microfibril interfacer 2	elastin microfibril interfacer 2	NM_032048	NM_032048,NP_114437,XM_011525747,XM_011525748,XP_011524049,XP_011524050,XR_935070
ENSG00000113805	18.313	1.4631	0.306978	4.76616	1.87773e-06	1.00121e-05	5067	1	5067	contactin 3 (plasmacytoma associated)	contactin 3 (plasmacytoma associated)	NM_020872	NM_020872,NP_065923,XM_005264757,XM_005264758,XM_005264759,XM_011533768,XM_011533769,XP_005264814,XP_005264815,XP_005264816,XP_011532070,XP_011532071
ENSG00000141179	179.296	1.46024	0.133609	10.9292	8.35546e-28	1.64418e-26	58488	1	58488	phosphatidylcholine transfer protein	phosphatidylcholine transfer protein	NM_001102402	NM_001102402,NM_021213,NP_001095872,NP_067036,XM_005257549,XM_005257550,XM_005257551,XM_011525089,XP_005257606,XP_005257607,XP_005257608,XP_011523391,XR_243677
ENSG00000214553	10.4643	1.45871	0.309949	4.70629	2.5227e-06	1.32429e-05	342666	1	342666	leucine rich repeat containing 37, member A11, pseudogene	leucine rich repeat containing 37, member A11, pseudogene	NM_198502	NM_198502,NR_033753
ENSG00000268119	10.8103	1.45866	0.308412	4.7296	2.24967e-06	1.18602e-05	NA	0	NA	NA	NA	NA	NA
ENSG00000204366	384.854	1.45644	0.0968783	15.0337	4.41711e-51	1.71388e-49	221527	1	221527	zinc finger and BTB domain containing 12	zinc finger and BTB domain containing 12	NM_181842	NM_181842,NP_862825,XM_011514383,XM_011547194,XM_011547608,XM_011548014,XM_011548203,XP_011512685,XP_011545496,XP_011545910,XP_011546316,XP_011546505
ENSG00000167554	20.3395	1.45593	0.299194	4.86617	1.13779e-06	6.23732e-06	162963	1	162963	zinc finger protein 610	zinc finger protein 610	NM_001161425	NM_001161425,NM_001161426,NM_001161427,NM_173530,NP_001154897,NP_001154898,NP_001154899,NP_775801,XM_011526560,XM_011526561,XM_011526562,XP_011524862,XP_011524863,XP_011524864
ENSG00000182575	11.6039	1.45476	0.309491	4.70049	2.59537e-06	1.36e-05	11248	1	11248	neurexophilin 3	neurexophilin 3	NM_007225	NM_007225,NP_009156
ENSG00000102924	62.0491	1.4533	0.214723	6.76827	1.30335e-11	1.12319e-10	869	1	869	cerebellin 1 precursor	cerebellin 1 precursor	NM_004352	NM_004352,NP_004343
ENSG00000138623	102.753	1.45225	0.167477	8.67138	4.26932e-18	5.47638e-17	8482	1	8482	semaphorin 7A, GPI membrane anchor (John Milton Hagen blood group)	semaphorin 7A, GPI membrane anchor (John Milton Hagen blood group)	NM_001146029	NM_001146029,NM_001146030,NM_003612,NP_001139501,NP_001139502,NP_003603
ENSG00000167034	121.502	1.45224	0.160019	9.0754	1.13258e-19	1.57638e-18	4824	1	4824	NK3 homeobox 1	NK3 homeobox 1	NM_001256339	NM_001256339,NM_006167,NP_001243268,NP_006158,NR_046072
ENSG00000141314	27.9149	1.45179	0.277631	5.22919	1.70254e-07	1.0256e-06	162494	1	162494	rhomboid, veinlet-like 3 (Drosophila)	rhomboid, veinlet-like 3 (Drosophila)	NM_138328	NM_138328,NP_612201,XM_006721733,XM_006721734,XM_006721735,XM_006721736,XM_011524441,XM_011524442,XM_011524443,XM_011524444,XM_011524445,XM_011524446,XP_006721796,XP_006721797,XP_006721798,XP_006721799,XP_011522743,XP_011522744,XP_011522745,XP_011522746,XP_011522747,XP_011522748
ENSG00000069188	9.18928	1.44963	0.310895	4.66276	3.11998e-06	1.62435e-05	54549	1	54549	sidekick cell adhesion molecule 2	sidekick cell adhesion molecule 2	NM_001144952	NM_001144952,NM_019064,NP_001138424,XM_011524914,XM_011524915,XM_011524916,XP_011523216,XP_011523217,XP_011523218
ENSG00000253537	23.5409	1.44857	0.295275	4.90585	9.30254e-07	5.1564e-06	56108	1	56108	protocadherin gamma subfamily A, 7	protocadherin gamma subfamily A, 7	NM_018920	NM_018920,NM_032087,NP_061743,NP_114476
ENSG00000133640	50.9398	1.44745	0.242507	5.9687	2.39158e-09	1.71644e-08	84125	1	84125	leucine-rich repeats and IQ motif containing 1	leucine-rich repeats and IQ motif containing 1	NM_001079910	NM_001079910,NM_032165,NP_001073379,XM_011538817,XM_011538818,XM_011538819,XM_011538820,XM_011538821,XM_011538822,XM_011538823,XM_011538824,XM_011538825,XM_011538826,XP_011537119,XP_011537120,XP_011537121,XP_011537122,XP_011537123,XP_011537124,XP_011537125,XP_011537126,XP_011537127,XP_011537128,XR_944764,XR_944765,XR_944766
ENSG00000272121	86.5567	1.44612	0.192925	7.49575	6.59212e-14	6.72931e-13	NA	0	NA	NA	NA	NA	NA
ENSG00000169856	16.8628	1.44488	0.303596	4.75923	1.94332e-06	1.03454e-05	3175	1	3175	one cut homeobox 1	one cut homeobox 1	NM_004498	NM_004498,NP_004489,NR_073510,XM_011521482,XM_011521483,XM_011521484,XM_011521485,XM_011521486,XM_011521487,XP_011519784,XP_011519785,XP_011519786,XP_011519787,XP_011519788,XP_011519789,XR_931800,XR_931801,XR_931802,XR_931803
ENSG00000159723	9.53868	1.44414	0.310627	4.64913	3.33343e-06	1.72855e-05	181	1	181	agouti related neuropeptide	agouti related neuropeptide	NM_001138	NM_001138,NP_001129,XM_011522927,XP_011521229
ENSG00000177098	16.1156	1.44403	0.296689	4.86716	1.13212e-06	6.20917e-06	6330	1	6330	sodium channel, voltage gated, type IV beta subunit	sodium channel, voltage gated, type IV beta subunit	NM_001142348	NM_001142348,NM_001142349,NM_174934,NP_001135820,NP_001135821,NP_777594,NR_024527
ENSG00000267102	9.46245	1.44357	0.310614	4.64747	3.36038e-06	1.74176e-05	NA	0	NA	NA	NA	NA	NA
ENSG00000189212	89.9969	1.44181	0.188566	7.6462	2.07005e-14	2.17383e-13	NA	0	NA	NA	NA	NA	NA
ENSG00000243350	8.12993	1.44084	0.309999	4.64788	3.35364e-06	1.73865e-05	399717	1	399717	GATA3 antisense RNA 1	GATA3 antisense RNA 1	NM_207423	NM_207423,NR_024255,NR_024256,NR_104327,NR_104328,NR_104329,NR_104330,NR_104336
ENSG00000267254	24.0376	1.43827	0.291019	4.94219	7.72497e-07	4.32705e-06	284408	1	284408	ZNF790 antisense RNA 1	ZNF790 antisense RNA 1	NR_040027	NR_040027,NR_040028
ENSG00000053524	35.5163	1.43825	0.260077	5.5301	3.20057e-08	2.06976e-07	23101	1	23101	MCF.2 cell line derived transforming sequence-like 2	MCF.2 cell line derived transforming sequence-like 2	NM_015078	NM_015078,NP_055893,XM_011512585,XM_011512586,XM_011512587,XP_011510887,XP_011510888,XP_011510889,XR_924114,XR_924115
ENSG00000178163	671.35	1.43727	0.0762541	18.8484	3.02726e-79	2.19965e-77	85460	1	85460	zinc finger protein 518B	zinc finger protein 518B	NM_053042	NM_053042,NP_444270,XM_005248193,XP_005248250
ENSG00000132972	4.72135	1.43643	0.295978	4.85315	1.21517e-06	6.63665e-06	56163	1	56163	ring finger protein 17	ring finger protein 17	NM_001184993	NM_001184993,NM_031277,NM_031994,NP_001171922,NP_112567,XM_006719846,XM_006719849,XM_006719852,XM_011535152,XM_011535153,XM_011535154,XM_011535155,XM_011535156,XM_011535157,XM_011535158,XM_011535159,XM_011535160,XM_011535161,XM_011535162,XM_011535163,XM_011535164,XP_006719909,XP_006719912,XP_006719915,XP_011533454,XP_011533455,XP_011533456,XP_011533457,XP_011533458,XP_011533459,XP_011533460,XP_01…
ENSG00000143217	22.3284	1.43636	0.273517	5.25147	1.50892e-07	9.16039e-07	81607	1	81607	poliovirus receptor-related 4	poliovirus receptor-related 4	NM_030916	NM_030916,NP_112178,XM_005245508,XM_011510021,XM_011510022,XM_011510023,XP_005245565,XP_011508323,XP_011508324,XP_011508325
ENSG00000248329	582.739	1.43288	0.0777857	18.4209	8.92902e-76	6.05543e-74	100506013	1	100506013	apelin receptor early endogenous ligand	apelin receptor early endogenous ligand	NM_001297550	NM_001297550,NP_001284479,NR_038825
ENSG00000013588	16.7421	1.43218	0.302435	4.73551	2.18509e-06	1.15405e-05	9052	1	9052	G protein-coupled receptor, class C, group 5, member A	G protein-coupled receptor, class C, group 5, member A	NM_003979	NM_003979,NP_003970
ENSG00000269586	25.2994	1.4315	0.265187	5.39806	6.73647e-08	4.23009e-07	102723631	1	102723631	cancer/testis antigen family 45, member A10	cancer/testis antigen family 45, member A10	NM_001291527	NM_001291527,NM_001291528,NM_001291529,NM_001291530,NP_001278456,NP_001278457,NP_001278458,NP_001278459,XM_011531238,XM_011531239,XP_011529540,XP_011529541
ENSG00000143184	12.6096	1.42755	0.308323	4.63006	3.65563e-06	1.88768e-05	6375	1	6375	chemokine (C motif) ligand 1	chemokine (C motif) ligand 1	NM_002995	NM_002995,NP_002986,XM_011509865,XP_011508167
ENSG00000181007	38.9722	1.42529	0.298163	4.78023	1.75095e-06	9.37246e-06	284406	1	284406	ZFP82 zinc finger protein	ZFP82 zinc finger protein	NM_133466	NM_133466,NP_597723,XM_005258810,XP_005258867
ENSG00000206432	8.88885	1.42456	0.310484	4.58817	4.47145e-06	2.28624e-05	645369	1	645369	transmembrane protein 200C	transmembrane protein 200C	NM_001080209	NM_001080209,NP_001073678,XM_005258130,XM_011525729,XP_005258187,XP_011524031
ENSG00000160973	10.5867	1.42189	0.308265	4.61257	3.97728e-06	2.0443e-05	8928	1	8928	forkhead box H1	forkhead box H1	NM_003923	NM_003923,NP_003914
ENSG00000113396	273.769	1.41705	0.111533	12.7052	5.53374e-37	1.49162e-35	28965	1	28965	solute carrier family 27 (fatty acid transporter), member 6	solute carrier family 27 (fatty acid transporter), member 6	NM_001017372	NM_001017372,NM_014031,NP_001017372,NP_054750,XM_005271967,XM_005271968,XM_005271969,XM_005271970,XM_011543348,XP_005272024,XP_005272025,XP_005272026,XP_005272027,XP_011541650
ENSG00000224940	30.9231	1.417	0.26895	5.26864	1.37442e-07	8.3721e-07	401399	1	401399	proline-rich transmembrane protein 4	proline-rich transmembrane protein 4	NM_001114726	NM_001114726,NM_001174164,NP_001108198,NP_001167635,XM_005250342,XM_005250343,XM_005250344,XM_006715985,XM_011516212,XP_005250399,XP_005250400,XP_005250401,XP_006716048,XP_011514514
ENSG00000280180	39.7912	1.41669	0.298434	4.74708	2.06377e-06	1.09517e-05	NA	0	NA	NA	NA	NA	NA
ENSG00000165061	16.3466	1.41456	0.301894	4.68561	2.79122e-06	1.45935e-05	79698	1	79698	zinc finger, matrin-type 4	zinc finger, matrin-type 4	NM_001135731	NM_001135731,NM_024645,NP_001129203,NP_078921,XM_011544643,XM_011544644,XM_011544645,XP_011542945,XP_011542946,XP_011542947
ENSG00000105784	151.378	1.41355	0.143234	9.86887	5.68e-23	9.22242e-22	154661	1	154661	RUN domain containing 3B	RUN domain containing 3B	NM_001134405	NM_001134405,NM_001134406,NM_138290,NP_001127877,NP_001127878,NP_612147,XM_005250156,XM_005250158,XM_011515826,XM_011515827,XM_011515828,XM_011515829,XP_005250213,XP_005250215,XP_011514128,XP_011514129,XP_011514130,XP_011514131
ENSG00000259692	15.2774	1.41353	0.307769	4.59284	4.37263e-06	2.23963e-05	NA	0	NA	NA	NA	NA	NA
ENSG00000182584	14.7027	1.41326	0.308949	4.57442	4.77548e-06	2.43266e-05	170487	1	170487	actin-like 10	actin-like 10	NM_001024675	NM_001024675,NP_001019846
ENSG00000266743	7.73732	1.41294	0.309158	4.5703	4.87036e-06	2.47593e-05	NA	0	NA	NA	NA	NA	NA
ENSG00000115361	164.548	1.4124	0.13613	10.3754	3.20876e-25	5.73094e-24	33	1	33	acyl-CoA dehydrogenase, long chain	acyl-CoA dehydrogenase, long chain	NM_001608	NM_001608,NP_001599,XM_005246517,XP_005246574
ENSG00000185306	9.27447	1.41021	0.310637	4.53975	5.63214e-06	2.83937e-05	115749	1	115749	chromosome 12 open reading frame 56	chromosome 12 open reading frame 56	NM_001099676	NM_001099676,NM_001170633,NP_001093146,NP_001164104,XM_011537860,XM_011537861,XP_011536162,XP_011536163,XR_944485,XR_944486
ENSG00000216307	5.95556	1.40962	0.303772	4.6404	3.47729e-06	1.79797e-05	NA	0	NA	NA	NA	NA	NA
ENSG00000198062	6.84672	1.40824	0.307551	4.57888	4.6748e-06	2.38552e-05	23784	1	23784	POTE ankyrin domain family, member H	POTE ankyrin domain family, member H	NM_001004053	NM_001004053,NM_001136213,NP_001129685
ENSG00000261308	11.6353	1.407	0.309783	4.54188	5.57548e-06	2.81384e-05	NA	0	NA	NA	NA	NA	NA
ENSG00000111224	228.512	1.40684	0.13143	10.7042	9.73095e-27	1.83757e-25	57097	1	57097	poly (ADP-ribose) polymerase family, member 11	poly (ADP-ribose) polymerase family, member 11	NM_001286521	NM_001286521,NM_001286522,NM_020367,NP_001273450,NP_001273451,NP_065100,NR_104461,XM_005253711,XM_005253714,XM_011520970,XM_011520971,XM_011520972,XM_011520973,XM_011520974,XP_005253768,XP_005253771,XP_011519272,XP_011519273,XP_011519274,XP_011519275,XP_011519276
ENSG00000050165	61.6161	1.40618	0.213017	6.60126	4.07676e-11	3.38001e-10	27122	1	27122	dickkopf WNT signaling pathway inhibitor 3	dickkopf WNT signaling pathway inhibitor 3	NM_001018057	NM_001018057,NM_013253,NM_015881,NP_001018067,NP_037385,NP_056965,XM_006718178,XP_006718241
ENSG00000231689	7.54789	1.40404	0.308657	4.54886	5.39368e-06	2.72679e-05	104355152	1	104355152	long intergenic non-protein coding RNA 1090	long intergenic non-protein coding RNA 1090	NR_126396	NR_126396
ENSG00000256151	9.43186	1.40219	0.310325	4.51845	6.22933e-06	3.12562e-05	NA	0	NA	NA	NA	NA	NA
ENSG00000230445	3.91784	1.40173	0.286212	4.89753	9.70494e-07	5.36392e-06	387646	1	387646	leucine rich repeat containing 37, member A6, pseudogene	leucine rich repeat containing 37, member A6, pseudogene	NM_001006604	NM_001006604,NR_003525
ENSG00000105464	101.676	1.39897	0.173133	8.08035	6.45824e-16	7.38531e-15	2906	1	2906	glutamate receptor, ionotropic, N-methyl D-aspartate 2D	glutamate receptor, ionotropic, N-methyl D-aspartate 2D	NM_000836	NM_000836,NP_000827,XM_011526872,XP_011525174
ENSG00000253741	11.875	1.39848	0.307072	4.55424	5.25753e-06	2.66199e-05	100288181	1	100288181	uncharacterized LOC100288181	uncharacterized LOC100288181	NR_038925	NR_038925
ENSG00000157399	4.38154	1.39709	0.295402	4.72945	2.2513e-06	1.18661e-05	415	1	415	arylsulfatase E (chondrodysplasia punctata 1)	arylsulfatase E (chondrodysplasia punctata 1)	NM_000047	NM_000047,NM_001282628,NM_001282631,NP_000038,NP_001269557,NP_001269560,XM_005274518,XM_005274519,XM_005274521,XM_011545519,XM_011545520,XM_011545521,XP_005274575,XP_005274576,XP_005274578,XP_011543821,XP_011543822,XP_011543823
ENSG00000165434	264.762	1.39507	0.111792	12.4791	9.70552e-36	2.52311e-34	283209	1	283209	phosphoglucomutase 2-like 1	phosphoglucomutase 2-like 1	NM_173582	NM_173582,NP_775853,XM_011544953,XP_011543255
ENSG00000137857	12.7059	1.39461	0.309789	4.5018	6.73789e-06	3.36492e-05	53905	1	53905	dual oxidase 1	dual oxidase 1	NM_017434	NM_017434,NM_175940,NP_059130,NP_787954,XM_011521681,XM_011521682,XP_011519983,XP_011519984
ENSG00000213626	1688.5	1.39356	0.0532486	26.1709	5.70654e-151	1.27158e-148	81606	1	81606	limb bud and heart development	limb bud and heart development	NM_030915	NM_030915,NP_112177
ENSG00000248238	8.09554	1.39317	0.309242	4.5051	6.63418e-06	3.31737e-05	NA	0	NA	NA	NA	NA	NA
ENSG00000109832	37.1895	1.39298	0.250404	5.56291	2.65307e-08	1.72523e-07	29118	1	29118	DEAD (Asp-Glu-Ala-Asp) box helicase 25	DEAD (Asp-Glu-Ala-Asp) box helicase 25	NM_013264	NM_013264,NP_037396,XM_011542790,XM_011542791,XP_011541092,XP_011541093
ENSG00000262621	30.9113	1.39005	0.267765	5.19131	2.0882e-07	1.24288e-06	NA	0	NA	NA	NA	NA	NA
ENSG00000179761	166.441	1.38929	0.143108	9.70802	2.78691e-22	4.38208e-21	51268	1	51268	pipecolic acid oxidase	pipecolic acid oxidase	NM_016518	NM_016518,NP_057602
ENSG00000116771	7.06691	1.38583	0.308737	4.48871	7.16558e-06	3.56405e-05	79814	1	79814	agmatine ureohydrolase (agmatinase)	agmatine ureohydrolase (agmatinase)	NM_024758	NM_024758,NP_079034
ENSG00000162757	92.6768	1.38557	0.18647	7.43053	1.08166e-13	1.08803e-12	148304	1	148304	chromosome 1 open reading frame 74	chromosome 1 open reading frame 74	NM_152485	NM_152485,NP_689698
ENSG00000103811	167.979	1.38488	0.140113	9.884	4.88437e-23	7.94712e-22	1512	1	1512	cathepsin H	cathepsin H	NM_004390	NM_004390,NM_148979,NP_004381,XM_005254181,XM_011521276,XP_005254238,XP_011519578
ENSG00000172889	224.601	1.38414	0.119603	11.5728	5.66371e-31	1.24309e-29	51162	1	51162	EGF-like-domain, multiple 7	EGF-like-domain, multiple 7	NM_016215	NM_016215,NM_201446,NP_057299,NP_958854,NR_045110,NR_045111,NR_046367,XM_006717141,XM_011518764,XM_011518765,XM_011518766,XM_011518767,XM_011518768,XP_006717204,XP_011517066,XP_011517067,XP_011517068,XP_011517069,XP_011517070
ENSG00000249741	10.2714	1.38323	0.310455	4.45549	8.37021e-06	4.13509e-05	NA	0	NA	NA	NA	NA	NA
ENSG00000095587	50.1732	1.38197	0.229929	6.01042	1.85038e-09	1.34077e-08	7093	1	7093	tolloid-like 2	tolloid-like 2	NM_012465	NM_012465,NP_036597
ENSG00000184005	36.2943	1.38145	0.251125	5.50104	3.7756e-08	2.42686e-07	256435	1	256435	ST6 (alpha-N-acetyl-neuraminyl-2,3-beta-galactosyl-1,3)-N-acetylgalactosaminide alpha-2,6-sialyltransferase 3	ST6 (alpha-N-acetyl-neuraminyl-2,3-beta-galactosyl-1,3)-N-acetylgalactosaminide alpha-2,6-sialyltransferase 3	NM_001160011	NM_001160011,NM_152996,NP_001153483,NP_694541,XM_006710553,XP_006710616
ENSG00000154678	10.3202	1.38022	0.310874	4.4398	9.00424e-06	4.4352e-05	5137	1	5137	phosphodiesterase 1C, calmodulin-dependent 70kDa	phosphodiesterase 1C, calmodulin-dependent 70kDa	NM_001191056	NM_001191056,NM_001191057,NM_001191058,NM_001191059,NM_005020,NP_001177985,NP_001177986,NP_001177987,NP_001177988,NP_005011,XM_005249768,XM_011515410,XM_011515411,XM_011515412,XM_011515413,XM_011515414,XP_005249825,XP_011513712,XP_011513713,XP_011513714,XP_011513715,XP_011513716
ENSG00000162105	8.88379	1.3802	0.310711	4.44208	8.90942e-06	4.39035e-05	22941	1	22941	SH3 and multiple ankyrin repeat domains 2	SH3 and multiple ankyrin repeat domains 2	NM_012309	NM_012309,NM_133266,NP_036441,NP_573573,NR_110766,XM_005277930,XM_005277932,XM_006718478,XM_011544854,XM_011544855,XM_011544856,XM_011544857,XM_011544858,XM_011544859,XP_005277987,XP_005277989,XP_006718541,XP_011543156,XP_011543157,XP_011543158,XP_011543159,XP_011543160,XP_011543161
ENSG00000171291	14.8686	1.37989	0.30849	4.47304	7.7116e-06	3.82506e-05	90594	1	90594	zinc finger protein 439	zinc finger protein 439	NM_152262	NM_152262,NP_689475,XM_005260142,XM_011528404,XP_005260199,XP_011526706
ENSG00000176092	26.6711	1.37645	0.263642	5.22089	1.78066e-07	1.06935e-06	55057	1	55057	absent in melanoma 1-like	absent in melanoma 1-like	NM_001039775	NM_001039775,NM_017977,NP_001034864,XM_005245918,XM_011541672,XM_011541673,XM_011541674,XM_011541675,XP_005245975,XP_011539974,XP_011539975,XP_011539976,XP_011539977,XR_946681
ENSG00000073150	120.342	1.37609	0.160619	8.56743	1.05823e-17	1.32687e-16	56666	1	56666	pannexin 2	pannexin 2	NM_001160300	NM_001160300,NM_052839,NP_001153772,NP_443071,NR_027691
ENSG00000132026	21.1945	1.37562	0.290665	4.73265	2.21613e-06	1.16939e-05	83546	1	83546	retbindin	retbindin	NM_001080997	NM_001080997,NM_001270440,NM_001270441,NM_001270442,NM_001270443,NM_001270444,NM_001270445,NM_031429,NP_001074466,NP_001257369,NP_001257370,NP_001257371,NP_001257372,NP_001257373,NP_001257374,NP_113617,XM_005260089,XM_005260090,XM_011528342,XM_011528343,XM_011528344,XM_011528345,XM_011528346,XP_005260146,XP_005260147,XP_011526644,XP_011526645,XP_011526646,XP_011526647,XP_011526648
ENSG00000279369	31.6519	1.37495	0.2612	5.26398	1.40972e-07	8.57598e-07	NA	0	NA	NA	NA	NA	NA
ENSG00000165731	93.9071	1.37463	0.17907	7.6765	1.63495e-14	1.72934e-13	5979	1	5979	ret proto-oncogene	ret proto-oncogene	NM_000323	NM_000323,NM_020629,NM_020630,NM_020975,NP_065681,NP_066124,XM_011540027,XP_011538329
ENSG00000234421	10.3728	1.37428	0.31047	4.42645	9.57961e-06	4.69489e-05	100131027	1	100131027	solute carrier family 25 (mitochondrial carrier; adenine nucleotide translocator), member 5 pseudogene 4	solute carrier family 25 (mitochondrial carrier; adenine nucleotide translocator), member 5 pseudogene 4	XR_915163	XR_915163
ENSG00000003137	474.63	1.37151	0.0880242	15.581	9.80043e-55	4.08735e-53	56603	1	56603	cytochrome P450, family 26, subfamily B, polypeptide 1	cytochrome P450, family 26, subfamily B, polypeptide 1	NM_001277742	NM_001277742,NM_019885,NP_001264671,NP_063938,XM_005264433,XM_011532988,XP_005264490,XP_011531290
ENSG00000073146	6.82361	1.37078	0.306845	4.46732	7.92061e-06	3.92541e-05	54456	1	54456	Mov10 RISC complex RNA helicase like 1	Mov10 RISC complex RNA helicase like 1	NM_001164104	NM_001164104,NM_001164105,NM_001164106,NM_018995,NP_001157576,NP_001157577,NP_001157578,NP_061868,XM_005261923,XM_011530696,XM_011530697,XM_011530698,XM_011530699,XM_011530700,XM_011530701,XM_011530702,XM_011530703,XM_011530704,XP_005261980,XP_011528998,XP_011528999,XP_011529000,XP_011529001,XP_011529002,XP_011529003,XP_011529004,XP_011529005,XP_011529006,XR_430479
ENSG00000248360	26.0663	1.37047	0.304053	4.50733	6.56483e-06	3.28691e-05	201853	1	201853	long intergenic non-protein coding RNA 504	long intergenic non-protein coding RNA 504	NR_126435	NR_126435
ENSG00000225813	11.1961	1.36889	0.310334	4.41101	1.0289e-05	5.01943e-05	NA	0	NA	NA	NA	NA	NA
ENSG00000269994	10.6383	1.36832	0.310774	4.40294	1.06792e-05	5.19895e-05	440173	1	440173	uncharacterized LOC440173	uncharacterized LOC440173	NR_027471	NR_027471
ENSG00000167920	159.532	1.36716	0.143195	9.5475	1.32858e-21	2.01849e-20	147184	1	147184	transmembrane protein 99	transmembrane protein 99	NM_001195386	NM_001195386,NM_001195387,NM_145274,NP_001182315,NP_001182316,NP_660317,XM_005257089,XP_005257146
ENSG00000243709	5.62939	1.36341	0.305994	4.45567	8.36317e-06	4.13248e-05	10637	1	10637	left-right determination factor 1	left-right determination factor 1	NM_020997	NM_020997,NP_066277
ENSG00000138411	25.9421	1.36297	0.284856	4.78475	1.71198e-06	9.17013e-06	57520	1	57520	HECT, C2 and WW domain containing E3 ubiquitin protein ligase 2	HECT, C2 and WW domain containing E3 ubiquitin protein ligase 2	NM_001304840	NM_001304840,NM_020760,NP_001291769,NP_065811,XM_006712646,XM_006712648,XP_006712709,XP_006712711
ENSG00000166450	327.616	1.3626	0.101278	13.454	2.91484e-41	8.78848e-40	283659	1	283659	protogenin	protogenin	NM_173814	NM_173814,NP_776175,XM_011521459,XM_011521460,XP_011519761,XP_011519762,XR_429451,XR_931797
ENSG00000206177	12.2511	1.36211	0.310145	4.39184	1.12395e-05	5.45355e-05	3042	1	3042	hemoglobin, mu	hemoglobin, mu	NM_001003938	NM_001003938,NP_001003938
ENSG00000253554	10.8717	1.36122	0.310575	4.38292	1.17098e-05	5.66413e-05	102724623	1	102724623	uncharacterized LOC102724623	uncharacterized LOC102724623	NR_125826	NR_125826
ENSG00000147364	415.944	1.36029	0.0951234	14.3003	2.17863e-46	7.40893e-45	26260	1	26260	F-box protein 25	F-box protein 25	NM_012173	NM_012173,NM_183420,NM_183421,NP_036305,NP_904356,NP_904357,XM_005266029,XM_005266030,XM_005266031,XM_005266032,XM_005266033,XM_011534748,XM_011534749,XP_005266086,XP_005266087,XP_005266088,XP_005266089,XP_005266090,XP_011533050,XP_011533051
ENSG00000157510	77.5413	1.3602	0.188709	7.20795	5.68005e-13	5.42876e-12	134265	1	134265	actin filament associated protein 1-like 1	actin filament associated protein 1-like 1	NM_001146337	NM_001146337,NM_152406,NP_001139809,NP_689619,XM_005268373,XM_011537558,XP_005268430,XP_011535860
ENSG00000250519	13.4968	1.35647	0.309142	4.38785	1.14478e-05	5.54774e-05	NA	0	NA	NA	NA	NA	NA
ENSG00000138798	53.9443	1.35594	0.222934	6.08226	1.18498e-09	8.72675e-09	1950	1	1950	epidermal growth factor	epidermal growth factor	NM_001178130	NM_001178130,NM_001178131,NM_001963,NP_001171601,NP_001171602,NP_001954,XM_005262796,XM_005262797,XM_005262798,XM_005262800,XM_005262801,XM_005262802,XM_006714124,XM_011531707,XM_011531708,XM_011531709,XP_005262853,XP_005262854,XP_005262855,XP_005262857,XP_005262858,XP_005262859,XP_006714187,XP_011530009,XP_011530010,XP_011530011,XR_427532,XR_938699
ENSG00000170396	73.3589	1.35533	0.185329	7.31311	2.6102e-13	2.55633e-12	91752	1	91752	zinc finger protein 804A	zinc finger protein 804A	NM_194250	NM_194250,NP_919226
ENSG00000186862	37.0131	1.35388	0.246065	5.50213	3.75237e-08	2.41259e-07	79955	1	79955	PDZ domain containing 7	PDZ domain containing 7	NM_001195263	NM_001195263,NM_024895,NP_001182192,NP_079171,XM_005270165,XM_011540177,XM_011540178,XM_011540179,XM_011540180,XM_011540181,XM_011540182,XM_011540183,XP_005270222,XP_011538479,XP_011538480,XP_011538481,XP_011538482,XP_011538483,XP_011538484,XP_011538485,XR_945815,XR_945816
ENSG00000184113	7.24819	1.35315	0.308177	4.39081	1.12928e-05	5.47602e-05	7122	1	7122	claudin 5	claudin 5	NM_001130861	NM_001130861,NM_003277,NP_001124333,NP_003268
ENSG00000176998	8.92152	1.35272	0.310145	4.36157	1.29135e-05	6.20662e-05	NA	0	NA	NA	NA	NA	NA
ENSG00000137507	21.7732	1.3524	0.277037	4.88165	1.05201e-06	5.79425e-06	2615	1	2615	leucine rich repeat containing 32	leucine rich repeat containing 32	NM_001128922	NM_001128922,NM_005512,NP_001122394,NP_005503,XM_005273902,XM_005273903,XM_011544935,XP_005273959,XP_005273960,XP_011543237
ENSG00000162981	236.768	1.35223	0.121634	11.1172	1.03525e-28	2.09169e-27	151354	1	151354	family with sequence similarity 84, member A	family with sequence similarity 84, member A	NM_145175	NM_145175,NP_660158
ENSG00000159176	568.205	1.35206	0.0810417	16.6836	1.72642e-62	8.61261e-61	1465	1	1465	cysteine and glycine-rich protein 1	cysteine and glycine-rich protein 1	NM_001144773	NM_001144773,NM_001193570,NM_001193571,NM_001193572,NM_004078,NP_001180499,NP_001180500,NP_001180501,NP_004069
ENSG00000174307	631.769	1.35074	0.0727887	18.557	7.16458e-77	4.94483e-75	23612	1	23612	pleckstrin homology-like domain, family A, member 3	pleckstrin homology-like domain, family A, member 3	NM_012396	NM_012396,NP_036528,NR_073080
ENSG00000165566	34.9323	1.34979	0.256746	5.2573	1.46185e-07	8.88616e-07	219287	1	219287	APC membrane recruitment protein 2	APC membrane recruitment protein 2	NM_152704	NM_152704,NM_199138,NP_689917,NP_954589,XM_005266279,XM_005266280,XM_006719770,XP_005266336,XP_005266337,XP_006719833
ENSG00000170748	13.5888	1.34887	0.309397	4.35968	1.30251e-05	6.25379e-05	27288	1	27288	RNA binding motif protein, X-linked-like 2	RNA binding motif protein, X-linked-like 2	NM_014469	NM_014469,NP_055284
ENSG00000091592	92.8453	1.34827	0.176474	7.64006	2.1712e-14	2.27597e-13	22861	1	22861	NLR family, pyrin domain containing 1	NLR family, pyrin domain containing 1	NM_001033053	NM_001033053,NM_014922,NM_033004,NM_033006,NM_033007,NP_001028225,NP_055737,NP_127497,NP_127499,NP_127500
ENSG00000136944	417.751	1.34684	0.0947809	14.21	7.93792e-46	2.65699e-44	4010	1	4010	LIM homeobox transcription factor 1, beta	LIM homeobox transcription factor 1, beta	NM_001174146	NM_001174146,NM_001174147,NM_002316,NP_001167617,NP_001167618,NP_002307
ENSG00000164741	250.112	1.34439	0.115944	11.5951	4.36254e-31	9.62929e-30	10395	1	10395	DLC1 Rho GTPase activating protein	DLC1 Rho GTPase activating protein	NM_001164271	NM_001164271,NM_006094,NM_024767,NM_182643,NP_001157743,NP_006085,NP_079043,NP_872584,XM_005273374,XM_005273375,XP_005273431,XP_005273432
ENSG00000233421	5.84301	1.34242	0.304909	4.40269	1.06915e-05	5.20385e-05	NA	0	NA	NA	NA	NA	NA
ENSG00000108839	5.45407	1.34163	0.305537	4.39104	1.12809e-05	5.4725e-05	239	1	239	arachidonate 12-lipoxygenase	arachidonate 12-lipoxygenase	NM_000697	NM_000697,NP_000688,XM_011523780,XP_011522082
ENSG00000233701	6.63791	1.34115	0.307238	4.36516	1.27028e-05	6.11287e-05	389152	1	389152	proline rich 23C	proline rich 23C	NM_001004315	NM_001004315,NM_001134657,NP_001128129
ENSG00000249645	9.70873	1.34021	0.310289	4.31925	1.56562e-05	7.44076e-05	NA	0	NA	NA	NA	NA	NA
ENSG00000279208	8.29437	1.34012	0.31013	4.32115	1.55217e-05	7.37983e-05	NA	0	NA	NA	NA	NA	NA
ENSG00000229689	5.58942	1.34011	0.302889	4.42442	9.67008e-06	4.73625e-05	NA	0	NA	NA	NA	NA	NA
ENSG00000197872	59.4105	1.33857	0.206804	6.47264	9.63079e-11	7.78885e-10	81553	1	81553	family with sequence similarity 49, member A	family with sequence similarity 49, member A	NM_030797	NM_030797,NP_110424,XM_005262630,XM_006712108,XP_005262687,XP_006712171
ENSG00000255150	55.4535	1.33857	0.21688	6.17191	6.7468e-10	5.07898e-09	493861	1	493861	EP300 interacting inhibitor of differentiation 3	EP300 interacting inhibitor of differentiation 3	NM_001008394	NM_001008394,NP_001008395
ENSG00000274849	26.5897	1.33591	0.270171	4.9447	7.62618e-07	4.27376e-06	NA	0	NA	NA	NA	NA	NA
ENSG00000130035	28.159	1.33463	0.273999	4.87093	1.11075e-06	6.10336e-06	3742	2	374226290	potassium channel, voltage gated shaker related subfamily A, member 6	potassium channel, voltage gated shaker related subfamily A, member 6	NM_002235	NM_002235,NP_002226,XM_005253686,XM_011520955,XP_005253743,XP_011519257
ENSG00000140511	518.348	1.33423	0.0855409	15.5976	7.56342e-55	3.17135e-53	145864	1	145864	hyaluronan and proteoglycan link protein 3	hyaluronan and proteoglycan link protein 3	NM_001307952	NM_001307952,NM_178232,NP_001294881,NP_839946,XM_011521260,XM_011521261,XP_011519562,XP_011519563,XR_243204,XR_931756
ENSG00000184922	35.043	1.33321	0.261775	5.09294	3.52548e-07	2.04883e-06	752	1	752	formin-like 1	formin-like 1	NM_005892	NM_005892,NP_005883,XM_006722062,XM_006722063,XM_006722064,XM_006722065,XM_006722066,XM_006722069,XM_006722070,XM_011525179,XM_011525180,XM_011525181,XM_011525182,XP_006722125,XP_006722126,XP_006722127,XP_006722128,XP_006722129,XP_006722132,XP_006722133,XP_011523481,XP_011523482,XP_011523483,XP_011523484
ENSG00000107738	6.72143	1.32997	0.307977	4.31841	1.57156e-05	7.46596e-05	64115	1	64115	chromosome 10 open reading frame 54	chromosome 10 open reading frame 54	NM_022153	NM_022153,NP_071436,XM_011540061,XP_011538363
ENSG00000164794	28.3422	1.32802	0.283711	4.6809	2.85623e-06	1.49235e-05	27012	1	27012	potassium channel, voltage gated modifier subfamily V, member 1	potassium channel, voltage gated modifier subfamily V, member 1	NM_014379	NM_014379,NP_055194,XM_005250866,XP_005250923
ENSG00000072163	31.9031	1.32685	0.260889	5.08587	3.6595e-07	2.12249e-06	55679	1	55679	LIM and senescent cell antigen-like domains 2	LIM and senescent cell antigen-like domains 2	NM_001136037	NM_001136037,NM_001161403,NM_001161404,NM_001256542,NM_017980,NP_001129509,NP_001154875,NP_001154876,NP_001243471,NP_060450,XM_005263709,XM_005263710,XM_006712627,XM_006712628,XM_011511453,XP_005263766,XP_005263767,XP_006712690,XP_006712691,XP_011509755,XR_922961
ENSG00000266714	10.2649	1.32601	0.310647	4.26853	1.96763e-05	9.22871e-05	80022	1	80022	myosin XVB	myosin XVB	NM_001080847	NM_001080847,NM_001309242,NP_001296171,NR_003587
ENSG00000183032	19.9718	1.32557	0.301238	4.4004	1.08051e-05	5.25803e-05	89874	1	89874	solute carrier family 25 (mitochondrial oxoadipate carrier), member 21	solute carrier family 25 (mitochondrial oxoadipate carrier), member 21	NM_001171170	NM_001171170,NM_030631,NP_001164641,NP_085134,XM_011537287,XM_011537288,XM_011537289,XP_011535589,XP_011535590,XP_011535591
ENSG00000132854	7.54903	1.32463	0.30943	4.28086	1.8617e-05	8.76245e-05	163782	1	163782	KN motif and ankyrin repeat domains 4	KN motif and ankyrin repeat domains 4	NM_181712	NM_181712,NP_859063,XM_011540843,XM_011540844,XM_011540845,XM_011540846,XP_011539145,XP_011539146,XP_011539147,XP_011539148,XR_946561
ENSG00000234546	4.37677	1.32435	0.291655	4.5408	5.60402e-06	2.82581e-05	NA	0	NA	NA	NA	NA	NA
ENSG00000267284	9.47663	1.32431	0.310651	4.263	2.01698e-05	9.43635e-05	NA	0	NA	NA	NA	NA	NA
ENSG00000166073	271.596	1.32428	0.114743	11.5412	8.17841e-31	1.78498e-29	11245	1	11245	G protein-coupled receptor 176	G protein-coupled receptor 176	NM_001271854	NM_001271854,NM_001271855,NM_007223,NP_001258783,NP_001258784,NP_009154,XM_005254139,XM_006720379,XM_011521167,XM_011521168,XM_011521169,XP_005254196,XP_006720442,XP_011519469,XP_011519470,XP_011519471
ENSG00000113327	26.9071	1.31874	0.282487	4.66832	3.03678e-06	1.58315e-05	2566	1	2566	gamma-aminobutyric acid (GABA) A receptor, gamma 2	gamma-aminobutyric acid (GABA) A receptor, gamma 2	NM_000816	NM_000816,NM_198903,NM_198904,NP_000807,NP_944493,NP_944494
ENSG00000171604	234.956	1.31857	0.116595	11.309	1.1843e-29	2.46304e-28	51523	1	51523	CXXC finger protein 5	CXXC finger protein 5	NM_016463	NM_016463,NP_057547,XM_005268461,XM_005268462,XM_006714786,XP_005268518,XP_005268519,XP_006714849
ENSG00000161381	20.4317	1.31795	0.291089	4.52765	5.9644e-06	2.99654e-05	57125	1	57125	plexin domain containing 1	plexin domain containing 1	NM_020405	NM_020405,NP_065138
ENSG00000251209	9.38361	1.31668	0.310266	4.24371	2.19857e-05	0.000102307	91948	1	91948	long intergenic non-protein coding RNA 923	long intergenic non-protein coding RNA 923	NR_024172	NR_024172,NR_024173
ENSG00000198133	26.9692	1.3163	0.264255	4.98116	6.32027e-07	3.5736e-06	161145	1	161145	transmembrane protein 229B	transmembrane protein 229B	NM_182526	NM_182526,NP_872332,XM_005267373,XM_005267374,XM_005267375,XM_006720062,XP_005267430,XP_005267431,XP_005267432,XP_006720125
ENSG00000175471	23.9269	1.31503	0.284812	4.61718	3.88998e-06	2.0025e-05	79772	1	79772	multiple C2 domains, transmembrane 1	multiple C2 domains, transmembrane 1	NM_001002796	NM_001002796,NM_001297777,NM_024717,NP_001002796,NP_001284706,NP_078993,XM_005272082,XM_005272083,XM_005272084,XM_005272086,XM_005272087,XM_005272088,XM_005272090,XM_006714692,XM_011543647,XM_011543648,XM_011543649,XM_011543650,XP_005272139,XP_005272140,XP_005272141,XP_005272143,XP_005272144,XP_005272145,XP_005272147,XP_006714755,XP_011541949,XP_011541950,XP_011541951,XP_011541952,XR_427720,XR_94…
ENSG00000255262	17.5471	1.315	0.305412	4.30568	1.66472e-05	7.88772e-05	NA	0	NA	NA	NA	NA	NA
ENSG00000135324	64.714	1.31246	0.201334	6.51883	7.08598e-11	5.78474e-10	112609	1	112609	melanocortin 2 receptor accessory protein 2	melanocortin 2 receptor accessory protein 2	NM_138409	NM_138409,NP_612418,XM_005248644,XM_005248645,XM_011535400,XM_011535401,XM_011535402,XM_011535403,XP_005248701,XP_005248702,XP_011533702,XP_011533703,XP_011533704,XP_011533705
ENSG00000092850	7.7827	1.31204	0.309561	4.23839	2.25129e-05	0.000104573	27285	1	27285	tektin 2 (testicular)	tektin 2 (testicular)	NM_014466	NM_014466,NP_055281,XM_005270753,XM_011541258,XP_005270810,XP_011539560
ENSG00000266736	5.85767	1.31177	0.304824	4.30337	1.68223e-05	7.9642e-05	NA	0	NA	NA	NA	NA	NA
ENSG00000144824	203.513	1.31157	0.133989	9.78862	1.26006e-22	2.00828e-21	90102	1	90102	pleckstrin homology-like domain, family B, member 2	pleckstrin homology-like domain, family B, member 2	NM_001134437	NM_001134437,NM_001134438,NM_001134439,NM_145753,NP_001127909,NP_001127910,NP_001127911,NP_665696
ENSG00000258932	13.0431	1.31137	0.310288	4.2263	2.37568e-05	0.000110023	NA	0	NA	NA	NA	NA	NA
ENSG00000107954	17.0559	1.3094	0.293582	4.46008	8.19305e-06	4.05185e-05	9148	1	9148	neuralized E3 ubiquitin protein ligase 1	neuralized E3 ubiquitin protein ligase 1	NM_004210	NM_004210,NP_004201,XM_005270269,XM_005270270,XM_011540331,XM_011540332,XM_011540333,XM_011540334,XM_011540335,XP_005270326,XP_005270327,XP_011538633,XP_011538634,XP_011538635,XP_011538636,XP_011538637,XR_945866
ENSG00000121653	299.27	1.30819	0.103471	12.643	1.22316e-36	3.27067e-35	9479	1	9479	mitogen-activated protein kinase 8 interacting protein 1	mitogen-activated protein kinase 8 interacting protein 1	NM_005456	NM_005456,NP_005447,XM_005253226,XP_005253283
ENSG00000127561	252.569	1.30783	0.11905	10.9855	4.48783e-28	8.89093e-27	9143	1	9143	synaptogyrin 3	synaptogyrin 3	NM_004209	NM_004209,NP_004200
ENSG00000235711	3.98133	1.30769	0.283199	4.61757	3.88257e-06	1.99913e-05	390616	1	390616	ankyrin repeat domain 34C	ankyrin repeat domain 34C	NM_001146341	NM_001146341,NP_001139813,XM_011521549,XP_011519851
ENSG00000173157	59.5373	1.30605	0.218211	5.98525	2.16064e-09	1.5569e-08	80070	1	80070	ADAM metallopeptidase with thrombospondin type 1 motif, 20	ADAM metallopeptidase with thrombospondin type 1 motif, 20	NM_025003	NM_025003,NM_175851,NP_079279,XM_011538754,XM_011538755,XP_011537056,XP_011537057
ENSG00000240429	12.6334	1.30524	0.31016	4.20829	2.57315e-05	0.000118582	101290506	1	101290506	leucine rich repeat (in FLII) interacting protein 1 pseudogene 1	leucine rich repeat (in FLII) interacting protein 1 pseudogene 1	NA	NA
ENSG00000266602	8.45413	1.30338	0.310226	4.20141	2.65264e-05	0.000121957	NA	0	NA	NA	NA	NA	NA
ENSG00000174514	93.1273	1.30335	0.179587	7.25744	3.94474e-13	3.80984e-12	148808	1	148808	major facilitator superfamily domain containing 4	major facilitator superfamily domain containing 4	NM_181644	NM_181644,NP_857595,XM_011509229,XP_011507531
ENSG00000180229	126.862	1.29981	0.185797	6.99583	2.6369e-12	2.39967e-11	283755	1	283755	hect domain and RLD 2 pseudogene 3	hect domain and RLD 2 pseudogene 3	NM_001024682	NM_001024682,NR_036432
ENSG00000180543	11.7086	1.29924	0.310635	4.18253	2.88287e-05	0.000131761	85453	1	85453	TSPY-like 5	TSPY-like 5	NM_033512	NM_033512,NP_277047
ENSG00000088756	16.3639	1.29784	0.308843	4.20227	2.64248e-05	0.000121609	79822	1	79822	Rho GTPase activating protein 28	Rho GTPase activating protein 28	NM_001010000	NM_001010000,NM_030672,NP_001010000,XM_005258144,XM_005258145,XM_005258146,XP_005258201,XP_005258202,XP_005258203
ENSG00000163909	201.533	1.29452	0.12753	10.1507	3.29025e-24	5.65628e-23	26508	1	26508	hes-related family bHLH transcription factor with YRPW motif-like	hes-related family bHLH transcription factor with YRPW motif-like	NM_014571	NM_014571,NP_055386,XM_005270745,XP_005270802
ENSG00000112981	7.09412	1.29404	0.308261	4.19788	2.69423e-05	0.000123626	8382	1	8382	NME/NM23 family member 5	NME/NM23 family member 5	NM_003551	NM_003551,NP_003542,XM_005272099,XM_006714716,XM_011543662,XM_011543663,XP_005272156,XP_006714779,XP_011541964,XP_011541965
ENSG00000233622	5.61727	1.29357	0.303131	4.26737	1.97791e-05	9.27028e-05	NA	0	NA	NA	NA	NA	NA
ENSG00000183779	184.828	1.2926	0.131931	9.79749	1.15413e-22	1.84448e-21	80139	1	80139	zinc finger protein 703	zinc finger protein 703	NM_025069	NM_025069,NP_079345
ENSG00000166800	11.769	1.29244	0.310467	4.16288	3.14265e-05	0.000142885	160287	1	160287	lactate dehydrogenase A-like 6A	lactate dehydrogenase A-like 6A	NM_001144071	NM_001144071,NM_144972,NP_001137543,NP_659409,XM_005252805,XM_011519922,XM_011519923,XM_011519924,XM_011519925,XP_005252862,XP_011518224,XP_011518225,XP_011518226,XP_011518227
ENSG00000234493	96.7972	1.28951	0.175947	7.329	2.31883e-13	2.27479e-12	101928941	1	101928941	Rhox homeobox family, member 1 pseudogene 1	Rhox homeobox family, member 1 pseudogene 1	NR_131250	NR_131250,XR_921595,XR_938562
ENSG00000142235	73.337	1.28618	0.195341	6.58428	4.57096e-11	3.7777e-10	114783	1	114783	lemur tyrosine kinase 3	lemur tyrosine kinase 3	NM_001080434	NM_001080434,NP_001073903,XM_011526411,XM_011526412,XP_011524713,XP_011524714
ENSG00000225449	8.65316	1.28611	0.310764	4.13854	3.4953e-05	0.000157602	100131320	1	100131320	RAB6C antisense RNA 1	RAB6C antisense RNA 1	NR_036537	NR_036537
ENSG00000197467	7.91073	1.28582	0.309341	4.15665	3.22952e-05	0.000146578	1305	1	1305	collagen, type XIII, alpha 1	collagen, type XIII, alpha 1	NM_001130103	NM_001130103,NM_005203,NM_080798,NM_080799,NM_080800,NM_080801,NM_080802,NM_080803,NM_080804,NM_080805,NM_080806,NM_080807,NM_080808,NM_080809,NM_080810,NM_080811,NM_080812,NM_080813,NM_080814,NM_080815,NP_001123575,NP_542988,NP_542990,NP_542991,NP_542992,NP_542995,XM_011539292,XM_011539293,XM_011539294,XM_011539295,XM_011539296,XP_011537594,XP_011537595,XP_011537596,XP_011537597,XP_011537598
ENSG00000123329	10.5004	1.28463	0.309743	4.14739	3.36282e-05	0.000152097	64333	1	64333	Rho GTPase activating protein 9	Rho GTPase activating protein 9	NM_001080156	NM_001080156,NM_001080157,NM_032496,NP_001073625,NP_001073626,NP_115885,XM_005269082,XM_005269083,XM_005269084,XM_005269085,XM_006719560,XM_011538656,XM_011538657,XM_011538658,XM_011538659,XM_011538660,XM_011538661,XM_011538662,XM_011538663,XP_005269139,XP_005269140,XP_005269141,XP_005269142,XP_006719623,XP_011536958,XP_011536959,XP_011536960,XP_011536961,XP_011536962,XP_011536963,XP_011536964,XP…
ENSG00000171608	130.526	1.28458	0.154731	8.302	1.0237e-16	1.22514e-15	5293	1	5293	phosphatidylinositol-4,5-bisphosphate 3-kinase, catalytic subunit delta	phosphatidylinositol-4,5-bisphosphate 3-kinase, catalytic subunit delta	NM_005026	NM_005026,NP_005017,XM_005263473,XM_006710686,XM_006710687,XM_006710688,XM_006710689,XM_006710690,XM_011541581,XM_011541582,XM_011541583,XP_005263530,XP_006710749,XP_006710750,XP_006710751,XP_006710752,XP_006710753,XP_011539883,XP_011539884,XP_011539885,XR_946667
ENSG00000205181	9.25577	1.2843	0.310818	4.132	3.59618e-05	0.000161745	NA	0	NA	NA	NA	NA	NA
ENSG00000203907	9.7491	1.28284	0.310361	4.13339	3.57457e-05	0.000160866	441161	1	441161	oocyte expressed protein	oocyte expressed protein	NM_001080507	NM_001080507,NP_001073976
ENSG00000131187	297.228	1.28174	0.106693	12.0134	3.02144e-33	7.20619e-32	2161	1	2161	coagulation factor XII (Hageman factor)	coagulation factor XII (Hageman factor)	NM_000505	NM_000505,NP_000496,XM_011534461,XM_011534462,XP_011532763,XP_011532764
ENSG00000167157	119.627	1.28123	0.166325	7.70315	1.32754e-14	1.41377e-13	51450	1	51450	paired related homeobox 2	paired related homeobox 2	NM_016307	NM_016307,NP_057391,XM_011518771,XM_011518772,XP_011517073,XP_011517074
ENSG00000197757	151.138	1.281	0.14391	8.90139	5.51511e-19	7.41166e-18	3223	1	3223	homeobox C6	homeobox C6	NM_004503	NM_004503,NM_153693,NP_004494,NP_710160
ENSG00000163364	112.747	1.28024	0.1781	7.18832	6.5592e-13	6.24172e-12	NA	0	NA	NA	NA	NA	NA
ENSG00000265763	77.9941	1.27984	0.190309	6.7251	1.75474e-11	1.49565e-10	118738	1	118738	zinc finger protein 488	zinc finger protein 488	NM_153034	NM_153034,NP_694579,XM_005270313,XM_006717617,XM_011539244,XM_011539245,XM_011539246,XM_011539247,XP_005270370,XP_006717680,XP_011537546,XP_011537547,XP_011537548,XP_011537549
ENSG00000035664	112.442	1.27941	0.15992	8.00029	1.24122e-15	1.39754e-14	23604	1	23604	death-associated protein kinase 2	death-associated protein kinase 2	NM_014326	NM_014326,NP_055141,XM_006720452,XM_006720453,XM_011521410,XM_011521411,XM_011521412,XM_011521413,XM_011521414,XM_011521415,XM_011521416,XM_011521417,XM_011521418,XM_011521419,XM_011521420,XM_011521421,XP_006720515,XP_006720516,XP_011519712,XP_011519713,XP_011519714,XP_011519715,XP_011519716,XP_011519717,XP_011519718,XP_011519719,XP_011519720,XP_011519721,XP_011519722,XP_011519723
ENSG00000119771	116.091	1.27923	0.168731	7.5815	3.41592e-14	3.53482e-13	114818	1	114818	kelch-like family member 29	kelch-like family member 29	NM_025067	NM_025067,NM_052920,NP_443152,XM_006711929,XM_011532501,XP_006711992,XP_011530803
ENSG00000182916	4.95904	1.27799	0.299967	4.26044	2.04029e-05	9.5359e-05	56849	1	56849	transcription elongation factor A (SII)-like 7	transcription elongation factor A (SII)-like 7	NM_152278	NM_152278,NP_689491
ENSG00000178662	84.9474	1.27729	0.1844	6.92673	4.3067e-12	3.84008e-11	80034	1	80034	cysteine-serine-rich nuclear protein 3	cysteine-serine-rich nuclear protein 3	NM_001172173	NM_001172173,NM_024969,NP_001165644,NP_079245,XM_005246865,XP_005246922
ENSG00000184160	91.3257	1.27624	0.170478	7.48622	7.08864e-14	7.21414e-13	152	1	152	adrenoceptor alpha 2C	adrenoceptor alpha 2C	NM_000683	NM_000683,NP_000674
ENSG00000105855	131.227	1.27603	0.153283	8.32469	8.4553e-17	1.01711e-15	3696	1	3696	integrin, beta 8	integrin, beta 8	NM_002214	NM_002214,NP_002205,XM_011515392,XM_011515393,XM_011515394,XM_011515395,XM_011515396,XP_011513694,XP_011513695,XP_011513696,XP_011513697,XP_011513698
ENSG00000128645	16.0993	1.27419	0.302768	4.20848	2.57096e-05	0.000118504	3231	1	3231	homeobox D1	homeobox D1	NM_024501	NM_024501,NP_078777,XM_005246507,XP_005246564
ENSG00000136425	599.546	1.27403	0.0758862	16.7887	2.95435e-63	1.48652e-61	10518	1	10518	calcium and integrin binding family member 2	calcium and integrin binding family member 2	NM_001271888	NM_001271888,NM_001271889,NM_001301224,NM_006383,NP_001258817,NP_001258818,NP_001288153,NP_006374,NR_125435,XM_005254126,XM_006720374,XM_011521161,XP_005254183,XP_006720437,XP_011519463
ENSG00000124191	129.134	1.27297	0.150416	8.46302	2.60546e-17	3.22028e-16	84969	1	84969	TOX high mobility group box family member 2	TOX high mobility group box family member 2	NM_001098796	NM_001098796,NM_001098797,NM_001098798,NM_032883,NP_001092266,NP_001092267,NP_001092268,NP_116272,XM_005260586,XM_006723884,XP_005260643,XP_006723947,XR_936651
ENSG00000229057	12.3711	1.2725	0.310375	4.09988	4.13371e-05	0.000184644	NA	0	NA	NA	NA	NA	NA
ENSG00000250979	10.1457	1.27175	0.309821	4.1048	4.04668e-05	0.000180998	392232	1	392232	transient receptor potential cation channel, subfamily A, member 1 pseudogene	transient receptor potential cation channel, subfamily A, member 1 pseudogene	NR_033867	NR_033867
ENSG00000123243	6.26781	1.26997	0.306807	4.13933	3.48328e-05	0.000157151	80760	1	80760	inter-alpha-trypsin inhibitor heavy chain family, member 5	inter-alpha-trypsin inhibitor heavy chain family, member 5	NM_001001851	NM_001001851,NM_030569,NM_032817,NP_001001851,NP_085046,NP_116206,XM_011519713,XM_011519714,XP_011518015,XP_011518016
ENSG00000164197	12.4074	1.26953	0.310445	4.08938	4.32532e-05	0.000192358	285671	1	285671	ring finger protein 180	ring finger protein 180	NM_001113561	NM_001113561,NM_178532,NP_001107033,NP_848627,XM_006714589,XM_006714590,XM_006714591,XM_011543342,XM_011543343,XP_006714652,XP_006714653,XP_006714654,XP_011541644,XP_011541645
ENSG00000121388	21.0708	1.2694	0.307225	4.13182	3.59901e-05	0.000161841	NA	0	NA	NA	NA	NA	NA
ENSG00000267733	5.7665	1.26896	0.303703	4.17828	2.93718e-05	0.00013409	NA	0	NA	NA	NA	NA	NA
ENSG00000253873	60.9778	1.26791	0.224851	5.6389	1.71135e-08	1.13109e-07	56105	1	56105	protocadherin gamma subfamily A, 11	protocadherin gamma subfamily A, 11	NM_018914	NM_018914,NM_032091,NM_032092,NP_061737,NP_114480,NP_114481
ENSG00000175745	385.658	1.26748	0.0993831	12.7535	2.98038e-37	8.08018e-36	7025	1	7025	nuclear receptor subfamily 2, group F, member 1	nuclear receptor subfamily 2, group F, member 1	NM_005654	NM_005654,NP_005645
ENSG00000105894	4.05886	1.26716	0.291708	4.34393	1.39957e-05	6.68416e-05	5764	1	5764	pleiotrophin	pleiotrophin	NM_002825	NM_002825,NP_002816,XM_005250515,XM_005250516,XP_005250572,XP_005250573
ENSG00000110002	38.3149	1.2665	0.24136	5.24736	1.54292e-07	9.3547e-07	4013	1	4013	von Willebrand factor A domain containing 5A	von Willebrand factor A domain containing 5A	NM_001130142	NM_001130142,NM_014622,NM_198315,NP_001123614,NP_055437,NP_938057,XM_011542828,XP_011541130
ENSG00000182580	156.582	1.26572	0.15021	8.42637	3.56552e-17	4.3631e-16	2049	1	2049	EPH receptor B3	EPH receptor B3	NM_004443	NM_004443,NP_004434
ENSG00000156509	56.2279	1.26561	0.285117	4.43891	9.04152e-06	4.44889e-05	286151	1	286151	F-box protein 43	F-box protein 43	NM_001029860	NM_001029860,NM_001077528,NP_001025031,NR_036491,XM_011516987,XM_011516988,XM_011516989,XM_011516990,XM_011516991,XM_011516992,XP_011515289,XP_011515290,XP_011515291,XP_011515292,XP_011515293,XP_011515294,XR_928320
ENSG00000115896	25.0517	1.26178	0.288514	4.37339	1.22332e-05	5.90147e-05	5334	1	5334	phospholipase C-like 1	phospholipase C-like 1	NM_006226	NM_006226,NP_006217,XM_005246643,XM_005246644,XM_011511351,XP_005246700,XP_005246701,XP_011509653
ENSG00000122861	29.9126	1.26139	0.260514	4.84193	1.28582e-06	6.99147e-06	5328	1	5328	plasminogen activator, urokinase	plasminogen activator, urokinase	NM_001145031	NM_001145031,NM_002658,NP_001138503,NP_002649,XM_011539866,XM_011539867,XP_011538168,XP_011538169
ENSG00000007516	25.949	1.26088	0.271062	4.65165	3.29297e-06	1.70984e-05	8938	1	8938	BAI1-associated protein 3	BAI1-associated protein 3	NM_001199096	NM_001199096,NM_001199097,NM_001199098,NM_001199099,NM_001286464,NM_003933,NP_001186025,NP_001186026,NP_001186027,NP_001186028,NP_001273393,NP_003924,XM_011522728,XM_011522729,XM_011522730,XP_011521030,XP_011521031,XP_011521032
ENSG00000259527	7.19531	1.26072	0.309868	4.06856	4.73053e-05	0.000209208	145978	1	145978	long intergenic non-protein coding RNA 52	long intergenic non-protein coding RNA 52	NM_152454	NM_152454,NR_026869
ENSG00000162745	25.1581	1.26002	0.271227	4.64561	3.39078e-06	1.75595e-05	25903	1	25903	olfactomedin-like 2B	olfactomedin-like 2B	NM_001297713	NM_001297713,NM_015441,NP_001284642,NP_056256,XM_005245075,XM_011509398,XP_005245132,XP_011507700
ENSG00000131951	10.796	1.25992	0.310558	4.05696	4.97159e-05	0.000219059	341883	1	341883	leucine rich repeat containing 9	leucine rich repeat containing 9	NM_198499	NM_198499,NR_075071
ENSG00000231806	34.4403	1.25858	0.252815	4.97826	6.41588e-07	3.62503e-06	101928099	1	101928099	prostate cancer associated transcript 7 (non-protein coding)	prostate cancer associated transcript 7 (non-protein coding)	NR_121566	NR_121566,NR_121567,NR_121568,NR_121569
ENSG00000168481	17.06	1.25852	0.300236	4.19176	2.76803e-05	0.000126813	203190	1	203190	leucine-rich repeat LGI family, member 3	leucine-rich repeat LGI family, member 3	NM_139278	NM_139278,NP_644807
ENSG00000254876	37.4228	1.25815	0.240791	5.22506	1.74096e-07	1.04739e-06	100499484	1	100499484	SUGT1-1300002K09Rik pseudogene	SUGT1-1300002K09Rik pseudogene	NR_036526	NR_036526
ENSG00000233170	11.6588	1.25773	0.310517	4.05044	5.11208e-05	0.000224615	NA	0	NA	NA	NA	NA	NA
ENSG00000143028	314.556	1.2572	0.104815	11.9945	3.79594e-33	9.02577e-32	284612	1	284612	synaptophysin-like 2	synaptophysin-like 2	NM_001006603	NM_001006603,NM_001040709,NP_001035799,XM_005270773,XM_011541283,XM_011541284,XM_011541285,XP_005270830,XP_011539585,XP_011539586,XP_011539587
ENSG00000225492	7.8158	1.25605	0.309616	4.05681	4.97485e-05	0.000219161	400759	1	400759	guanylate binding protein 1, interferon-inducible pseudogene 1	guanylate binding protein 1, interferon-inducible pseudogene 1	NR_003133	NR_003133
ENSG00000154511	82.5466	1.25524	0.186321	6.737	1.61693e-11	1.38323e-10	388650	1	388650	family with sequence similarity 69, member A	family with sequence similarity 69, member A	NM_001006605	NM_001006605,NM_001252269,NM_001252270,NM_001252271,NM_001252273,NP_001006606,NP_001239198,NP_001239199,NP_001239200,NP_001239202
ENSG00000128596	241.522	1.25275	0.120437	10.4017	2.43546e-25	4.37989e-24	64753	1	64753	coiled-coil domain containing 136	coiled-coil domain containing 136	NM_001201372	NM_001201372,NM_022742,NP_001188301,NP_073579,XM_005250534,XM_005250538,XM_005250540,XM_006716090,XM_006716091,XM_011516483,XM_011516484,XM_011516485,XM_011516486,XM_011516487,XM_011516488,XM_011516489,XM_011516490,XP_005250591,XP_005250595,XP_005250597,XP_006716153,XP_006716154,XP_011514785,XP_011514786,XP_011514787,XP_011514788,XP_011514789,XP_011514790,XP_011514791,XP_011514792
ENSG00000217236	15.8974	1.25268	0.301783	4.15092	3.31139e-05	0.000149916	100131390	1	100131390	Sp9 transcription factor	Sp9 transcription factor	NM_001145250	NM_001145250,NP_001138722,XR_922825,XR_922826,XR_922827
ENSG00000157827	1139.51	1.25255	0.0597815	20.9521	1.79526e-97	1.75748e-95	114793	1	114793	formin-like 2	formin-like 2	NM_001004417	NM_001004417,NM_001004421,NM_001004422,NM_052905,NP_443137,XM_005246263,XM_005246265,XM_011510530,XM_011510531,XM_011510532,XM_011510533,XM_011510534,XM_011510535,XM_011510536,XP_005246320,XP_005246322,XP_011508832,XP_011508833,XP_011508834,XP_011508835,XP_011508836,XP_011508837,XP_011508838,XR_241279
ENSG00000235890	5.67847	1.2524	0.302826	4.13573	3.53833e-05	0.000159419	54082	1	54082	TSPEAR antisense RNA 1	TSPEAR antisense RNA 1	NR_103707	NR_103707
ENSG00000203799	13.4407	1.25233	0.310045	4.03919	5.36351e-05	0.000235	221262	1	221262	coiled-coil domain containing 162, pseudogene	coiled-coil domain containing 162, pseudogene	NR_028595	NR_028595
ENSG00000101445	81.695	1.25132	0.186115	6.72336	1.77587e-11	1.51256e-10	26051	1	26051	protein phosphatase 1, regulatory subunit 16B	protein phosphatase 1, regulatory subunit 16B	NM_001172735	NM_001172735,NM_015568,NP_001166206,NP_056383,XM_011528768,XM_011528769,XP_011527070,XP_011527071
ENSG00000130475	226.231	1.25127	0.121125	10.3304	5.13232e-25	9.11776e-24	23149	1	23149	FCH domain only 1	FCH domain only 1	NM_001161357	NM_001161357,NM_001161358,NM_001161359,NM_015122,NP_001154829,NP_001154830,NP_001154831,NP_055937,XM_005259831,XM_006722701,XM_006722702,XM_011527824,XM_011527825,XM_011527826,XM_011527827,XM_011527828,XP_005259888,XP_006722764,XP_006722765,XP_011526126,XP_011526127,XP_011526128,XP_011526129,XP_011526130
ENSG00000067840	415.386	1.25065	0.0973301	12.8496	8.64725e-38	2.38304e-36	57595	1	57595	PDZ domain containing 4	PDZ domain containing 4	NM_001303512	NM_001303512,NM_001303513,NM_001303514,NM_001303515,NM_001303516,NM_032512,NP_001290441,NP_001290442,NP_001290443,NP_001290444,NP_001290445,NP_115901
ENSG00000169297	10.2322	1.25049	0.310453	4.02797	5.62613e-05	0.000245433	190	1	190	nuclear receptor subfamily 0, group B, member 1	nuclear receptor subfamily 0, group B, member 1	NM_000475	NM_000475,NP_000466
ENSG00000131831	13.0584	1.25042	0.307439	4.0672	4.75817e-05	0.000210254	10742	1	10742	retinoic acid induced 2	retinoic acid induced 2	NM_001172732	NM_001172732,NM_001172739,NM_001172743,NM_021785,NP_001166203,NP_001166210,NP_001166214,NP_068557,NR_033348,NR_033349,XM_006724459,XM_006724460,XM_011545439,XM_011545440,XM_011545441,XP_006724522,XP_006724523,XP_011543741,XP_011543742,XP_011543743
ENSG00000183770	8.02325	1.24989	0.308977	4.04526	5.22648e-05	0.000229512	668	1	668	forkhead box L2	forkhead box L2	NM_023067	NM_023067,NP_075555
ENSG00000206532	16.3205	1.24954	0.297776	4.19623	2.71393e-05	0.000124432	NA	0	NA	NA	NA	NA	NA
ENSG00000111913	14.2427	1.24948	0.305883	4.08481	4.4112e-05	0.000196065	9750	1	9750	family with sequence similarity 65, member B	family with sequence similarity 65, member B	NM_001286445	NM_001286445,NM_001286446,NM_001286447,NM_014722,NM_015864,NP_001273374,NP_001273375,NP_001273376,NP_055537,NP_056948,XM_006715275,XM_006715277,XM_006715278,XM_006715279,XM_006715281,XM_011515007,XM_011515008,XM_011515009,XM_011515010,XM_011515011,XM_011515012,XP_006715338,XP_006715340,XP_006715341,XP_006715342,XP_006715344,XP_011513309,XP_011513310,XP_011513311,XP_011513312,XP_011513313,XP_01151…
ENSG00000111670	1444.22	1.24708	0.0521699	23.9041	2.774e-126	4.18732e-124	79158	1	79158	N-acetylglucosamine-1-phosphate transferase, alpha and beta subunits	N-acetylglucosamine-1-phosphate transferase, alpha and beta subunits	NM_024312	NM_024312,NP_077288,XM_006719593,XM_011538731,XP_006719656,XP_011537033
ENSG00000179314	266.684	1.24661	0.111932	11.1372	8.26586e-29	1.67879e-27	23302	2	23302339166	WSC domain containing 1	WSC domain containing 1	NM_015253	NM_015253,NP_056068,XM_005256572,XM_005256573,XM_011523776,XM_011523777,XP_005256629,XP_005256630,XP_011522078,XP_011522079
ENSG00000260401	22.0348	1.24636	0.283906	4.39006	1.13321e-05	5.49393e-05	NA	0	NA	NA	NA	NA	NA
ENSG00000111666	5545.81	1.24612	0.045518	27.3765	5.22492e-165	1.37357e-162	56994	1	56994	choline phosphotransferase 1	choline phosphotransferase 1	NM_020244	NM_020244,NP_064629,XM_011538574,XM_011538575,XP_011536876,XP_011536877,XR_245946
ENSG00000227214	5.79625	1.24605	0.303482	4.10583	4.02869e-05	0.000180297	NA	0	NA	NA	NA	NA	NA
ENSG00000114270	35.4829	1.24549	0.257432	4.83814	1.31057e-06	7.11282e-06	1294	1	1294	collagen, type VII, alpha 1	collagen, type VII, alpha 1	NM_000094	NM_000094,NP_000085,XM_011533336,XM_011533337,XM_011533338,XM_011533339,XM_011533340,XM_011533341,XM_011533342,XP_011531638,XP_011531639,XP_011531640,XP_011531641,XP_011531642,XP_011531643,XP_011531644,XR_940369,XR_940370,XR_940371,XR_940372,XR_940373,XR_940374,XR_940375
ENSG00000257702	6.29392	1.24498	0.306687	4.05945	4.91876e-05	0.000217017	151534	1	151534	LBX2 antisense RNA 1	LBX2 antisense RNA 1	NM_138482	NM_138482,NR_024606
ENSG00000106333	118.26	1.24464	0.155924	7.98236	1.4356e-15	1.60943e-14	5118	1	5118	procollagen C-endopeptidase enhancer	procollagen C-endopeptidase enhancer	NM_002593	NM_002593,NP_002584
ENSG00000170382	11.3467	1.24443	0.308403	4.03508	5.45841e-05	0.000238711	10446	1	10446	leucine rich repeat neuronal 2	leucine rich repeat neuronal 2	NM_006338	NM_006338,NM_201630,NP_006329,NP_963924,XM_005244827,XM_011509066,XP_005244884,XP_011507368
ENSG00000142621	6.24752	1.24229	0.305003	4.07304	4.64038e-05	0.000205432	114827	1	114827	forkhead-associated (FHA) phosphopeptide binding domain 1	forkhead-associated (FHA) phosphopeptide binding domain 1	NM_052929	NM_052929,NP_443161,XM_011540575,XM_011540576,XM_011540577,XM_011540578,XM_011540579,XM_011540580,XM_011540581,XM_011540582,XM_011540583,XM_011540584,XM_011540585,XM_011540586,XM_011540587,XM_011540588,XM_011540589,XM_011540590,XM_011540591,XM_011540592,XM_011540593,XM_011540594,XM_011540595,XM_011540596,XM_011540597,XM_011540598,XP_011538877,XP_011538878,XP_011538879,XP_011538880,XP_011538881,XP…
ENSG00000279154	16.3953	1.24108	0.309781	4.00632	6.16719e-05	0.000267161	NA	0	NA	NA	NA	NA	NA
ENSG00000130558	20.7147	1.24092	0.292346	4.24468	2.18901e-05	0.000101903	10439	1	10439	olfactomedin 1	olfactomedin 1	NM_001282611	NM_001282611,NM_001282612,NM_006334,NM_014279,NM_058199,NP_001269540,NP_001269541,NP_006325,NP_055094
ENSG00000196724	73.4302	1.24067	0.211755	5.85898	4.65707e-09	3.25453e-08	147686	1	147686	zinc finger protein 418	zinc finger protein 418	NM_133460	NM_133460,NP_597717,XM_006723023,XM_011526471,XP_006723086,XP_011524773
ENSG00000146904	8.73335	1.24052	0.311032	3.9884	6.65215e-05	0.000286578	2041	1	2041	EPH receptor A1	EPH receptor A1	NM_005232	NM_005232,NP_005223,XM_006715880,XM_011515878,XP_006715943,XP_011514180,XR_428169
ENSG00000139364	8.26894	1.23846	0.308213	4.01819	5.8647e-05	0.000255096	114795	1	114795	transmembrane protein 132B	transmembrane protein 132B	NM_001286219	NM_001286219,NM_052907,NP_001273148,NP_443139,XM_011537852,XM_011537853,XM_011537854,XP_011536154,XP_011536155,XP_011536156
ENSG00000169129	29.7521	1.2382	0.269769	4.58987	4.43517e-06	2.26968e-05	84632	1	84632	actin filament associated protein 1-like 2	actin filament associated protein 1-like 2	NM_001001936	NM_001001936,NM_001287824,NM_032550,NP_001001936,NP_001274753,NP_115939,XM_005270233,XM_005270237,XM_005270241,XM_005270242,XM_011540279,XM_011540280,XM_011540281,XM_011540282,XM_011540283,XM_011540284,XM_011540285,XM_011540286,XM_011540287,XM_011540288,XM_011540289,XM_011540290,XM_011540291,XP_005270290,XP_005270294,XP_005270298,XP_005270299,XP_011538581,XP_011538582,XP_011538583,XP_011538584,XP…
ENSG00000163694	76.2247	1.23756	0.187381	6.60449	3.9888e-11	3.31296e-10	54502	1	54502	RNA binding motif protein 47	RNA binding motif protein 47	NM_001098634	NM_001098634,NM_019027,NP_001092104,NP_061900,XM_005248103,XM_005248107,XM_005248108,XM_005248109,XM_011513702,XM_011513703,XM_011513704,XM_011513705,XM_011513706,XM_011513707,XM_011513708,XM_011513709,XM_011513710,XP_005248160,XP_005248164,XP_005248165,XP_005248166,XP_011512004,XP_011512005,XP_011512006,XP_011512007,XP_011512008,XP_011512009,XP_011512010,XP_011512011,XP_011512012
ENSG00000095627	3.16033	1.2361	0.275364	4.48895	7.15734e-06	3.56071e-05	56165	1	56165	tudor domain containing 1	tudor domain containing 1	NM_198795	NM_198795,NP_942090,XM_005269978,XM_005269979,XM_011539959,XM_011539960,XM_011539961,XM_011539962,XM_011539963,XM_011539964,XM_011539965,XM_011539966,XP_005270035,XP_005270036,XP_011538261,XP_011538262,XP_011538263,XP_011538264,XP_011538265,XP_011538266,XP_011538267,XP_011538268
ENSG00000165801	242.042	1.23587	0.117954	10.4775	1.09592e-25	2.00951e-24	55701	1	55701	Rho guanine nucleotide exchange factor (GEF) 40	Rho guanine nucleotide exchange factor (GEF) 40	NM_001278529	NM_001278529,NM_001278530,NM_018071,NP_001265458,NP_001265459,NP_060541,XM_005267844,XM_011536937,XM_011536938,XP_005267901,XP_011535239,XP_011535240
ENSG00000255690	8.92821	1.23422	0.311038	3.96805	7.24635e-05	0.000310064	9865	1	9865	TLR4 interactor with leucine-rich repeats	TLR4 interactor with leucine-rich repeats	NM_014817	NM_014817,NP_055632
ENSG00000107807	420.622	1.23226	0.0979298	12.5831	2.61483e-36	6.91289e-35	3195	1	3195	T-cell leukemia homeobox 1	T-cell leukemia homeobox 1	NM_001195517	NM_001195517,NM_005521,NP_001182446,NP_005512,XM_011539744,XM_011539745,XP_011538046,XP_011538047
ENSG00000135363	10.7974	1.23165	0.309256	3.98261	6.81611e-05	0.000293102	4005	1	4005	LIM domain only 2 (rhombotin-like 1)	LIM domain only 2 (rhombotin-like 1)	NM_001142315	NM_001142315,NM_001142316,NM_005574,NP_001135787,NP_001135788,NP_005565,XM_005252921,XM_011520101,XP_005252978,XP_011518403
ENSG00000158104	6.77922	1.23047	0.309847	3.97122	7.15054e-05	0.000306244	3242	1	3242	4-hydroxyphenylpyruvate dioxygenase	4-hydroxyphenylpyruvate dioxygenase	NM_001171993	NM_001171993,NM_002150,NP_001165464,NP_002141
ENSG00000172818	13.5263	1.23009	0.30703	4.00643	6.1643e-05	0.000267085	5017	1	5017	ovo-like zinc finger 1	ovo-like zinc finger 1	NM_004561	NM_004561,NP_004552,XM_005274018,XM_011545067,XM_011545068,XP_005274075,XP_011543369,XP_011543370
ENSG00000249532	175.485	1.22994	0.129184	9.52085	1.71761e-21	2.60447e-20	NA	0	NA	NA	NA	NA	NA
ENSG00000136717	326.851	1.22986	0.101258	12.1457	6.04264e-34	1.47424e-32	274	1	274	bridging integrator 1	bridging integrator 1	NM_004305	NM_004305,NM_139343,NM_139344,NM_139345,NM_139346,NM_139347,NM_139348,NM_139349,NM_139350,NM_139351,NP_004296,NP_647593,NP_647594,NP_647595,NP_647596,NP_647597,NP_647598,NP_647599,NP_647600,NP_647601,XM_005263642,XM_005263643,XM_005263644,XM_005263645,XM_005263646,XM_005263647,XM_005263648,XM_006712425,XM_006712426,XM_006712427,XM_006712428,XM_006712429,XM_006712430,XM_006712431,XM_006712432,XM_0…
ENSG00000154914	47.7804	1.22857	0.219006	5.60973	2.02642e-08	1.32881e-07	124739	1	124739	ubiquitin specific peptidase 43	ubiquitin specific peptidase 43	NM_001267576	NM_001267576,NM_153210,NP_001254505,NP_694942,XM_011523639,XM_011523640,XM_011523641,XM_011523642,XP_011521941,XP_011521942,XP_011521943,XP_011521944
ENSG00000180616	13.2149	1.22712	0.306141	4.00834	6.11462e-05	0.00026508	6752	1	6752	somatostatin receptor 2	somatostatin receptor 2	NM_001050	NM_001050,NP_001041
ENSG00000196263	52.5799	1.22592	0.221277	5.54021	3.02113e-08	1.9575e-07	57573	1	57573	zinc finger protein 471	zinc finger protein 471	NM_020813	NM_020813,NP_065864,XM_011527148,XP_011525450
ENSG00000106991	4.40104	1.22559	0.294569	4.16063	3.17372e-05	0.000144185	2022	1	2022	endoglin	endoglin	NM_000118	NM_000118,NM_001114753,NM_001278138,NP_000109,NP_001108225,NP_001265067
ENSG00000064300	107.414	1.22505	0.166336	7.36493	1.77243e-13	1.75793e-12	4804	1	4804	nerve growth factor receptor	nerve growth factor receptor	NM_002507	NM_002507,NP_002498
ENSG00000110092	426.981	1.224	0.0906439	13.5034	1.49372e-41	4.53876e-40	595	1	595	cyclin D1	cyclin D1	NM_053056	NM_053056,NP_444284,XM_006718653,XP_006718716
ENSG00000185340	765.229	1.22214	0.0696458	17.5479	6.1722e-69	3.51365e-67	10634	1	10634	growth arrest-specific 2 like 1	growth arrest-specific 2 like 1	NM_001278730	NM_001278730,NM_006478,NM_152236,NM_152237,NP_001265659,NP_006469,NP_689422,NP_689423,XM_011529824,XM_011529825,XP_011528126,XP_011528127
ENSG00000008853	285.516	1.22181	0.109511	11.1569	6.62569e-29	1.34918e-27	23221	1	23221	Rho-related BTB domain containing 2	Rho-related BTB domain containing 2	NM_001160036	NM_001160036,NM_001160037,NM_015178,NP_001153508,NP_001153509,NP_055993,XM_006716315,XM_011544454,XP_006716378,XP_011542756
ENSG00000103253	601.743	1.22159	0.0791004	15.4436	8.33482e-54	3.43932e-52	84264	1	84264	hydroxyacylglutathione hydrolase-like	hydroxyacylglutathione hydrolase-like	NM_001290137	NM_001290137,NM_001290139,NM_032304,NM_207112,NP_001277066,NP_001277068,NP_115680,XM_005255631,XM_005255632,XM_011522711,XM_011522712,XP_005255688,XP_005255689,XP_011521013,XP_011521014
ENSG00000087076	13.74	1.22073	0.302132	4.04038	5.33646e-05	0.000233946	51171	1	51171	hydroxysteroid (17-beta) dehydrogenase 14	hydroxysteroid (17-beta) dehydrogenase 14	NM_016246	NM_016246,NP_057330,XM_005258969,XM_005258970,XP_005259026,XP_005259027,XR_243938
ENSG00000260209	10.3031	1.22019	0.31088	3.92494	8.67498e-05	0.00036763	NA	0	NA	NA	NA	NA	NA
ENSG00000175093	85.3882	1.22003	0.171631	7.10845	1.17352e-12	1.09216e-11	92369	1	92369	splA/ryanodine receptor domain and SOCS box containing 4	splA/ryanodine receptor domain and SOCS box containing 4	NM_080862	NM_080862,NP_543138,XM_011513313,XP_011511615,XR_924215,XR_924216
ENSG00000255101	3.35884	1.21958	0.280168	4.35302	1.34278e-05	6.43784e-05	NA	0	NA	NA	NA	NA	NA
ENSG00000090534	11.6443	1.21772	0.310092	3.92697	8.60211e-05	0.000364806	7066	1	7066	thrombopoietin	thrombopoietin	NM_000460	NM_000460,NM_001177597,NM_001177598,NM_001289997,NM_001289998,NM_001290003,NM_001290022,NM_001290026,NM_001290027,NM_001290028,NM_199228,NM_199356,NP_000451,NP_001171068,NP_001171069,NP_001276926,NP_001276927,NP_001276932,NP_001276951,NP_001276955,NP_001276956,NP_001276957,XM_011513113,XP_011511415
ENSG00000154654	57.3134	1.21704	0.224678	5.41683	6.0665e-08	3.82273e-07	4685	1	4685	neural cell adhesion molecule 2	neural cell adhesion molecule 2	NM_004540	NM_004540,NP_004531,XM_011529575,XM_011529576,XM_011529577,XM_011529578,XM_011529579,XM_011529580,XM_011529581,XM_011529582,XM_011529583,XM_011529584,XM_011529585,XP_011527877,XP_011527878,XP_011527879,XP_011527880,XP_011527881,XP_011527882,XP_011527883,XP_011527884,XP_011527885,XP_011527886,XP_011527887,XR_937498
ENSG00000140545	553.06	1.2154	0.0828761	14.6653	1.07523e-48	3.94314e-47	4240	1	4240	milk fat globule-EGF factor 8 protein	milk fat globule-EGF factor 8 protein	NM_001114614	NM_001114614,NM_001310319,NM_001310320,NM_001310321,NM_005928,NP_001108086,NP_001297248,NP_001297249,NP_001297250,NP_005919,XM_005254921,XP_005254978,XR_931838
ENSG00000214357	85.7342	1.21534	0.187134	6.49449	8.33126e-11	6.76359e-10	54492	1	54492	neuralized E3 ubiquitin protein ligase 1B	neuralized E3 ubiquitin protein ligase 1B	NM_001142651	NM_001142651,NM_001308177,NM_001308178,NP_001136123,NP_001295106,NP_001295107,NR_015355,XM_011534571,XP_011532873
ENSG00000223658	2.91996	1.21443	0.270492	4.4897	7.13233e-06	3.54902e-05	NA	0	NA	NA	NA	NA	NA
ENSG00000139289	137.987	1.21393	0.146406	8.29154	1.11794e-16	1.33519e-15	22822	1	22822	pleckstrin homology-like domain, family A, member 1	pleckstrin homology-like domain, family A, member 1	NM_007350	NM_007350,NP_031376
ENSG00000149451	4.75976	1.21333	0.298149	4.06955	4.71048e-05	0.000208418	80332	1	80332	ADAM metallopeptidase domain 33	ADAM metallopeptidase domain 33	NM_001282447	NM_001282447,NM_025220,NM_153202,NP_001269376,NP_079496,NP_694882,XM_005260843,XM_006723639,XM_006723640,XM_006723644,XM_011529366,XM_011529367,XM_011529368,XM_011529369,XM_011529370,XM_011529371,XM_011529372,XM_011529373,XP_005260900,XP_006723702,XP_006723703,XP_006723707,XP_011527668,XP_011527669,XP_011527670,XP_011527671,XP_011527672,XP_011527673,XP_011527674,XP_011527675,XR_937151,XR_937152,X…
ENSG00000178053	314.554	1.21191	0.105837	11.4507	2.33127e-30	4.99038e-29	4291	1	4291	myeloid leukemia factor 1	myeloid leukemia factor 1	NM_001130156	NM_001130156,NM_001130157,NM_001195432,NM_001195433,NM_001195434,NM_022443,NP_001123628,NP_001123629,NP_001182361,NP_001182362,NP_001182363,NP_071888,XM_005247479,XM_005247480,XM_006713645,XM_011512852,XM_011512853,XM_011512854,XP_005247536,XP_005247537,XP_006713708,XP_011511154,XP_011511155,XP_011511156
ENSG00000261594	14.0055	1.21185	0.302153	4.0107	6.05394e-05	0.000262742	100507050	1	100507050	trophoblast glycoprotein-like	trophoblast glycoprotein-like	NM_001195528	NM_001195528,NP_001182457
ENSG00000168675	15.8632	1.21107	0.303122	3.9953	6.46118e-05	0.000279173	753	1	753	low density lipoprotein receptor class A domain containing 4	low density lipoprotein receptor class A domain containing 4	NM_001003674	NM_001003674,NM_001003675,NM_001276249,NM_001276251,NM_004338,NM_181481,NM_181482,NM_181483,NP_001003674,NP_001003675,NP_001263178,NP_001263180,NP_852146,NP_852147,XM_005258140,XM_006722353,XM_006722354,XM_011525737,XM_011525738,XM_011525739,XM_011525740,XP_005258197,XP_006722416,XP_006722417,XP_011524039,XP_011524040,XP_011524041,XP_011524042
ENSG00000131095	7.38427	1.21044	0.309388	3.91238	9.13922e-05	0.000385697	2670	1	2670	glial fibrillary acidic protein	glial fibrillary acidic protein	NM_001131019	NM_001131019,NM_001242376,NM_002055,NP_001124491,NP_001229305,NP_002046
ENSG00000158486	6.56626	1.21035	0.308646	3.92149	8.80026e-05	0.000372332	55567	1	55567	dynein, axonemal, heavy chain 3	dynein, axonemal, heavy chain 3	NM_017539	NM_017539,NP_060009,XM_006721062,XM_011545882,XM_011545883,XM_011545884,XM_011545885,XM_011545886,XM_011545887,XM_011545888,XM_011545889,XM_011545890,XP_006721125,XP_011544184,XP_011544185,XP_011544186,XP_011544187,XP_011544188,XP_011544189,XP_011544190,XP_011544191,XP_011544192
ENSG00000028277	36.5088	1.20952	0.250631	4.8259	1.39373e-06	7.54142e-06	5452	1	5452	POU class 2 homeobox 2	POU class 2 homeobox 2	NM_001207025	NM_001207025,NM_001207026,NM_001247994,NM_002698,NP_001193954,NP_001193955,NP_001234923,NP_002689,XM_005259010,XM_011527040,XM_011527041,XM_011527042,XM_011527043,XM_011527044,XP_005259067,XP_011525342,XP_011525343,XP_011525344,XP_011525345,XP_011525346
ENSG00000146592	25.5753	1.20922	0.276276	4.37684	1.20411e-05	5.81597e-05	9586	1	9586	cAMP responsive element binding protein 5	cAMP responsive element binding protein 5	NM_001011666	NM_001011666,NM_004904,NM_182898,NM_182899,NP_001011666,NP_004895,NP_878901,NP_878902,XM_005249906,XM_011515616,XM_011515617,XM_011515618,XP_005249963,XP_011513918,XP_011513919,XP_011513920
ENSG00000183963	526.318	1.2088	0.082597	14.6349	1.68226e-48	6.10231e-47	6525	1	6525	smoothelin	smoothelin	NM_001207017	NM_001207017,NM_001207018,NM_006932,NM_134269,NM_134270,NP_001193946,NP_001193947,NP_008863,NP_599031,NP_599032,XM_006724298,XM_006724302,XM_011530332,XM_011530333,XM_011530334,XM_011530335,XM_011530336,XM_011530337,XM_011530338,XM_011530339,XM_011530340,XM_011530341,XP_006724361,XP_006724365,XP_011528634,XP_011528635,XP_011528636,XP_011528637,XP_011528638,XP_011528639,XP_011528640,XP_011528641,X…
ENSG00000226435	39.2523	1.20684	0.248698	4.85264	1.21832e-06	6.65226e-06	348840	1	348840	ankyrin repeat domain 18D, pseudogene	ankyrin repeat domain 18D, pseudogene	NM_182631	NM_182631,NR_003291
ENSG00000137558	63.9841	1.20608	0.214551	5.62142	1.89391e-08	1.24367e-07	51050	1	51050	peptidase inhibitor 15	peptidase inhibitor 15	NM_015886	NM_015886,NP_056970,XM_005251255,XM_006716453,XP_005251312,XP_006716516
ENSG00000141506	5.89271	1.20496	0.304319	3.95954	7.50956e-05	0.000320272	23533	1	23533	phosphoinositide-3-kinase, regulatory subunit 5	phosphoinositide-3-kinase, regulatory subunit 5	NM_001142633	NM_001142633,NM_001251851,NM_001251852,NM_001251853,NM_001251855,NM_014308,NP_001136105,NP_001238780,NP_001238781,NP_001238782,NP_001238784,NP_055123,XM_005256579,XM_005256580,XM_011523778,XP_005256636,XP_005256637,XP_011522080
ENSG00000221818	12.4641	1.20476	0.305946	3.93781	8.22274e-05	0.000349414	64641	1	64641	early B-cell factor 2	early B-cell factor 2	NM_022659	NM_022659,NP_073150
ENSG00000104892	89.8366	1.20308	0.170866	7.04108	1.9075e-12	1.75363e-11	147700	1	147700	kinesin light chain 3	kinesin light chain 3	NM_145275	NM_145275,NM_177417,NP_803136,XM_005258536,XP_005258593
ENSG00000251322	246.36	1.20306	0.123496	9.74167	2.00239e-22	3.17843e-21	NA	0	NA	NA	NA	NA	NA
ENSG00000160233	123.983	1.2023	0.168559	7.13284	9.83199e-13	9.21631e-12	81543	1	81543	leucine rich repeat containing 3	leucine rich repeat containing 3	NM_030891	NM_030891,NP_112153
ENSG00000182983	6.56485	1.20081	0.305981	3.92445	8.69288e-05	0.000368322	389114	1	389114	zinc finger protein 662	zinc finger protein 662	NM_001134656	NM_001134656,NM_207404,NP_001128128,NP_997287
ENSG00000154319	9.54282	1.20058	0.310389	3.86799	0.000109735	0.000457577	83648	1	83648	family with sequence similarity 167, member A	family with sequence similarity 167, member A	NM_053279	NM_053279,NP_444509,XM_005272398,XM_011543837,XM_011543838,XM_011543839,XM_011543840,XP_005272455,XP_011542139,XP_011542140,XP_011542141,XP_011542142
ENSG00000011105	356.093	1.19966	0.0964333	12.4404	1.57806e-35	4.07526e-34	10867	1	10867	tetraspanin 9	tetraspanin 9	NM_001168320	NM_001168320,NM_006675,NP_001161792,NP_006666,XM_011520912,XM_011520913,XP_011519214,XP_011519215
ENSG00000176753	9.96007	1.19776	0.310955	3.85187	0.000117221	0.000486279	NA	0	NA	NA	NA	NA	NA
ENSG00000237094	8.61043	1.19772	0.310631	3.85576	0.000115371	0.000479116	NA	0	NA	NA	NA	NA	NA
ENSG00000213420	116.486	1.19711	0.171129	6.99537	2.64559e-12	2.4057e-11	221914	1	221914	glypican 2	glypican 2	NM_152742	NM_152742,NP_689955
ENSG00000258545	3.33836	1.19704	0.280192	4.27221	1.93546e-05	9.09132e-05	101928969	1	101928969	RHOXF1 antisense RNA 1	RHOXF1 antisense RNA 1	NR_131238	NR_131238,XR_921597,XR_921598,XR_921599,XR_921601,XR_921602,XR_921603,XR_938564,XR_938565,XR_938566,XR_938567,XR_938568,XR_938569
ENSG00000137261	28.8136	1.19636	0.263435	4.5414	5.58812e-06	2.81961e-05	9856	1	9856	KIAA0319	KIAA0319	NM_001168374	NM_001168374,NM_001168375,NM_001168376,NM_001168377,NM_001252328,NM_014809,NP_001161846,NP_001161847,NP_001161848,NP_001161849,NP_001239257,NP_055624,XM_006715288,XM_011515022,XM_011515023,XM_011515024,XM_011515025,XM_011515026,XM_011515027,XP_006715351,XP_011513324,XP_011513325,XP_011513326,XP_011513327,XP_011513328,XP_011513329
ENSG00000139445	55.4085	1.19594	0.231133	5.17426	2.28816e-07	1.35672e-06	121643	1	121643	forkhead box N4	forkhead box N4	NM_213596	NM_213596,NP_998761,XM_011537919,XM_011537920,XM_011537921,XM_011537922,XM_011537923,XP_011536221,XP_011536222,XP_011536223,XP_011536224,XP_011536225
ENSG00000250056	42.8976	1.19391	0.242802	4.91724	8.77744e-07	4.88153e-06	255167	1	255167	long intergenic non-protein coding RNA 1018	long intergenic non-protein coding RNA 1018	NR_024423	NR_024423,NR_024424
ENSG00000234224	11.6437	1.19346	0.308252	3.87169	0.000108083	0.00045117	730130	1	730130	transmembrane protein 229A	transmembrane protein 229A	NM_001136002	NM_001136002,NP_001129474
ENSG00000171877	115.567	1.19332	0.162342	7.35063	1.97277e-13	1.94673e-12	84978	1	84978	FERM domain containing 5	FERM domain containing 5	NM_001286490	NM_001286490,NM_001286491,NM_032892,NP_001273419,NP_001273420,NP_116281,NR_104455,XM_005254730,XM_011522122,XM_011522123,XP_005254787,XP_011520424,XP_011520425,XR_931927,XR_931928
ENSG00000154898	17.5291	1.19266	0.294916	4.04406	5.25342e-05	0.000230565	NA	0	NA	NA	NA	NA	NA
ENSG00000141639	65.5952	1.19246	0.205686	5.79747	6.73241e-09	4.63153e-08	5596	1	5596	mitogen-activated protein kinase 4	mitogen-activated protein kinase 4	NM_001292039	NM_001292039,NM_001292040,NM_002747,NP_001278968,NP_001278969,NP_002738,XM_005258299,XM_011526074,XM_011526075,XM_011526076,XM_011526077,XM_011526078,XP_005258356,XP_011524376,XP_011524377,XP_011524378,XP_011524379,XP_011524380
ENSG00000181885	152.64	1.19194	0.152846	7.79832	6.2739e-15	6.78643e-14	1366	1	1366	claudin 7	claudin 7	NM_001185022	NM_001185022,NM_001185023,NM_001307,NP_001171951,NP_001171952,NP_001298
ENSG00000260293	42.2075	1.19171	0.234325	5.08572	3.66237e-07	2.12363e-06	NA	0	NA	NA	NA	NA	NA
ENSG00000177483	24.972	1.19164	0.280269	4.25178	2.12074e-05	9.89016e-05	375316	1	375316	RNA binding motif protein 44	RNA binding motif protein 44	NM_001080504	NM_001080504,NM_198852,NP_001073973,XM_005246075,XM_006712518,XM_011511151,XM_011511152,XM_011511153,XM_011511154,XM_011511155,XP_005246132,XP_006712581,XP_011509453,XP_011509454,XP_011509455,XP_011509456,XP_011509457
ENSG00000230524	10.7176	1.18984	0.310822	3.82803	0.000129171	0.00053208	344875	1	344875	collagen, type VI, alpha 4 pseudogene 1	collagen, type VI, alpha 4 pseudogene 1	NR_027927	NR_027927
ENSG00000161243	13.6242	1.18918	0.301777	3.94059	8.12814e-05	0.000345457	126433	1	126433	F-box protein 27	F-box protein 27	NM_178820	NM_178820,NP_849142
ENSG00000187189	797.201	1.18915	0.0697658	17.0449	3.8139e-65	2.00525e-63	23270	1	23270	TSPY-like 4	TSPY-like 4	NM_021648	NM_021648,NP_067680
ENSG00000223392	4.52072	1.18808	0.298078	3.98578	6.72582e-05	0.000289432	100874194	1	100874194	CLDN10 antisense RNA 1	CLDN10 antisense RNA 1	NR_046533	NR_046533
ENSG00000215007	14.2515	1.18468	0.304255	3.89372	9.87206e-05	0.000414382	NA	0	NA	NA	NA	NA	NA
ENSG00000251359	21.1883	1.18449	0.285047	4.15542	3.24686e-05	0.000147251	152641	1	152641	WWC2 antisense RNA 2	WWC2 antisense RNA 2	NM_153008	NM_153008,NR_024008
ENSG00000243970	10.2523	1.18446	0.310446	3.81535	0.000135988	0.000558684	NA	0	NA	NA	NA	NA	NA
ENSG00000092096	57.5171	1.184	0.227933	5.19449	2.05284e-07	1.22245e-06	51310	1	51310	solute carrier family 22, member 17	solute carrier family 22, member 17	NM_001289050	NM_001289050,NM_016609,NM_020372,NP_001275979,NP_057693,NP_065105,NR_110290,XM_005267747,XM_005267748,XP_005267804,XP_005267805,XR_245694
ENSG00000214076	3.83262	1.18385	0.288644	4.10143	4.10612e-05	0.000183516	NA	0	NA	NA	NA	NA	NA
ENSG00000155367	34.7587	1.18384	0.242724	4.87733	1.07534e-06	5.91854e-06	333926	1	333926	protein phosphatase, Mg2+/Mn2+ dependent, 1J	protein phosphatase, Mg2+/Mn2+ dependent, 1J	NM_005167	NM_005167,NP_005158
ENSG00000175985	11.6702	1.18322	0.309067	3.82836	0.000129	0.000531469	400224	1	400224	pleckstrin homology domain containing, family D (with coiled-coil domains) member 1	pleckstrin homology domain containing, family D (with coiled-coil domains) member 1	NM_001161498	NM_001161498,NP_001154970,XM_011536762,XM_011536763,XP_011535064,XP_011535065
ENSG00000142185	4.57837	1.18313	0.295631	4.00206	6.27939e-05	0.00027182	7226	1	7226	transient receptor potential cation channel, subfamily M, member 2	transient receptor potential cation channel, subfamily M, member 2	NM_001001188	NM_001001188,NM_003307,NP_003298,NR_038257,XM_005261171,XM_006724049,XM_011529734,XM_011529735,XM_011529736,XM_011529737,XP_005261228,XP_006724112,XP_011528036,XP_011528037,XP_011528038,XP_011528039,XR_937565,XR_937566
ENSG00000186675	7.40655	1.18242	0.30806	3.83828	0.000123898	0.000511531	139599	1	139599	melanoma antigen family E2	melanoma antigen family E2	NM_138703	NM_138703,NP_619648
ENSG00000259343	29.3239	1.18217	0.275553	4.29015	1.7855e-05	8.42401e-05	NA	0	NA	NA	NA	NA	NA
ENSG00000260231	50.2526	1.18211	0.216441	5.46156	4.71966e-08	3.00642e-07	100134229	1	100134229	JHDM1D antisense RNA 1 (head to head)	JHDM1D antisense RNA 1 (head to head)	NR_024451	NR_024451
ENSG00000184792	180.48	1.18111	0.131198	9.00255	2.20536e-19	3.01219e-18	23762	1	23762	oxysterol binding protein 2	oxysterol binding protein 2	NM_001003812	NM_001003812,NM_001282738,NM_001282739,NM_001282740,NM_001282741,NM_001282742,NM_030758,NP_001269667,NP_001269668,NP_001269669,NP_001269670,NP_001269671,NP_110385,XM_005261465,XM_006724203,XM_006724207,XM_006724208,XM_011530057,XM_011530058,XM_011530059,XM_011530060,XM_011530061,XM_011530062,XP_005261522,XP_006724266,XP_006724270,XP_006724271,XP_011528359,XP_011528360,XP_011528361,XP_011528362,XP…
ENSG00000196208	279.795	1.18031	0.115795	10.1931	2.12965e-24	3.7074e-23	9687	1	9687	growth regulation by estrogen in breast cancer 1	growth regulation by estrogen in breast cancer 1	NM_014668	NM_014668,NM_033090,NM_148903,NP_055483,NP_149081,NP_683701,XM_005246192,XM_005246196,XM_005246197,XM_011510418,XM_011510419,XM_011510420,XM_011510421,XM_011510422,XM_011510423,XP_005246249,XP_005246253,XP_005246254,XP_011508720,XP_011508721,XP_011508722,XP_011508723,XP_011508724,XP_011508725,XR_922686
ENSG00000065413	76.459	1.18022	0.189451	6.22968	4.67375e-10	3.56543e-09	91526	1	91526	ankyrin repeat domain 44	ankyrin repeat domain 44	NM_001195144	NM_001195144,NM_153697,NP_001182073,NP_710181,XM_005246945,XM_005246946,XM_005246947,XM_005246948,XM_006712838,XM_011512148,XM_011512149,XM_011512150,XP_005247002,XP_005247003,XP_005247004,XP_005247005,XP_006712901,XP_011510450,XP_011510451,XP_011510452,XR_923062
ENSG00000249421	10.4318	1.17972	0.309784	3.80819	0.000139987	0.000574408	103689846	1	103689846	ADAMTS19 antisense RNA 1	ADAMTS19 antisense RNA 1	NR_125748	NR_125748
ENSG00000140368	6.36119	1.179	0.304766	3.86852	0.000109496	0.000456744	9051	1	9051	proline-serine-threonine phosphatase interacting protein 1	proline-serine-threonine phosphatase interacting protein 1	NM_003978	NM_003978,NP_003969,XM_006720737,XM_011522163,XM_011522164,XM_011522165,XM_011522166,XM_011522167,XM_011522168,XM_011522169,XM_011522170,XM_011522171,XM_011522172,XM_011522173,XP_006720800,XP_011520465,XP_011520466,XP_011520467,XP_011520468,XP_011520469,XP_011520470,XP_011520471,XP_011520472,XP_011520473,XP_011520474,XP_011520475,XR_931936,XR_931937,XR_931938,XR_931939,XR_931940
ENSG00000259345	6.79591	1.17849	0.306672	3.84285	0.000121616	0.000502995	NA	0	NA	NA	NA	NA	NA
ENSG00000124557	9.3407	1.17793	0.310403	3.79484	0.000147737	0.000604092	696	1	696	butyrophilin, subfamily 1, member A1	butyrophilin, subfamily 1, member A1	NM_001732	NM_001732,NP_001723,XM_005249340,XP_005249397
ENSG00000114812	12.3905	1.17744	0.307283	3.83178	0.000127218	0.000524314	7433	1	7433	vasoactive intestinal peptide receptor 1	vasoactive intestinal peptide receptor 1	NM_001251882	NM_001251882,NM_001251883,NM_001251884,NM_001251885,NM_004624,NP_001238811,NP_001238812,NP_001238813,NP_001238814,NP_004615,XM_005265437,XM_005265438,XM_005265439,XM_011534079,XM_011534080,XP_005265494,XP_005265495,XP_005265496,XP_011532381,XP_011532382,XR_940499,XR_940500
ENSG00000180155	20.4965	1.17656	0.284303	4.13841	3.49726e-05	0.00015766	66004	1	66004	Ly6/neurotoxin 1	Ly6/neurotoxin 1	NM_023946	NM_023946,NM_177457,NM_177458,NM_177476,NM_177477,NP_076435,NP_803252,NP_803253,NP_803429,NP_803430,XM_011517238,XP_011515540
ENSG00000138039	44.7483	1.1761	0.242831	4.84329	1.27707e-06	6.94715e-06	3973	1	3973	luteinizing hormone/choriogonadotropin receptor	luteinizing hormone/choriogonadotropin receptor	NM_000233	NM_000233,NP_000224,XM_005264309,XM_006712015,XM_011532828,XM_011532829,XM_011532830,XM_011532831,XM_011532832,XM_011532833,XM_011532834,XP_005264366,XP_006712078,XP_011531130,XP_011531131,XP_011531132,XP_011531133,XP_011531134,XP_011531135,XP_011531136
ENSG00000226985	3.12878	1.17509	0.275944	4.25842	2.05873e-05	9.62016e-05	100133123	1	100133123	long intergenic non-protein coding RNA 1203	long intergenic non-protein coding RNA 1203	NR_045260	NR_045260
ENSG00000104888	90.45	1.17462	0.17965	6.5384	6.21815e-11	5.09226e-10	57030	1	57030	solute carrier family 17 (vesicular glutamate transporter), member 7	solute carrier family 17 (vesicular glutamate transporter), member 7	NM_020309	NM_020309,NP_064705
ENSG00000164742	267.317	1.17461	0.119322	9.84407	7.27065e-23	1.17157e-21	107	1	107	adenylate cyclase 1 (brain)	adenylate cyclase 1 (brain)	NM_001281768	NM_001281768,NM_021116,NP_001268697,NP_066939,XM_005249584,XM_005249585,XP_005249641,XP_005249642
ENSG00000134470	11.1888	1.17454	0.309521	3.7947	0.00014782	0.000604324	3601	1	3601	interleukin 15 receptor, alpha	interleukin 15 receptor, alpha	NM_001243539	NM_001243539,NM_001256765,NM_002189,NM_172200,NP_001230468,NP_001243694,NP_002180,NP_751950,NR_046362,XM_011519461,XM_011519462,XM_011519463,XM_011519464,XM_011519465,XM_011519466,XM_011519467,XM_011519468,XM_011519469,XM_011519470,XM_011519471,XM_011519472,XM_011519473,XM_011519474,XM_011519475,XM_011519476,XM_011519477,XP_011517763,XP_011517764,XP_011517765,XP_011517766,XP_011517767,XP_01151776…
ENSG00000187595	16.9026	1.17276	0.293269	3.99892	6.36323e-05	0.000275144	201181	1	201181	zinc finger protein 385C	zinc finger protein 385C	NM_001013624	NM_001013624,NM_001242704,NP_001229633,XM_003960738,XM_005257130,XM_006721751,XM_011508764,XM_011508765,XM_011508766,XM_011524475,XM_011524476,XM_011524477,XM_011524478,XM_011524479,XM_011524480,XM_011524481,XM_011524482,XM_011524483,XM_011524484,XM_011524485,XM_011524486,XM_011524487,XP_003960787,XP_005257187,XP_006721814,XP_011507066,XP_011507067,XP_011507068,XP_011522777,XP_011522778,XP_011522…
ENSG00000145911	110.631	1.17252	0.158754	7.38577	1.51572e-13	1.51229e-12	23138	1	23138	NEDD4 binding protein 3	NEDD4 binding protein 3	NM_015111	NM_015111,NP_055926,XM_006714834,XM_011534473,XM_011534474,XP_006714897,XP_011532775,XP_011532776,XR_941093,XR_941094
ENSG00000135083	63.2072	1.17214	0.201084	5.82912	5.57214e-09	3.86515e-08	79616	1	79616	cyclin J-like	cyclin J-like	NM_001308173	NM_001308173,NM_024565,NP_001295102,NP_078841,NR_131769,XM_005265982,XM_006714917,XM_006714918,XM_011534646,XM_011534647,XM_011534648,XP_005266039,XP_006714980,XP_006714981,XP_011532948,XP_011532949,XP_011532950,XR_427810,XR_427811
ENSG00000116254	13.9191	1.17127	0.306766	3.81811	0.000134476	0.000552863	26038	1	26038	chromodomain helicase DNA binding protein 5	chromodomain helicase DNA binding protein 5	NM_015557	NM_015557,NP_056372
ENSG00000174498	393.248	1.16999	0.0945804	12.3703	3.7844e-35	9.68749e-34	9543	1	9543	immunoglobulin superfamily, DCC subclass, member 3	immunoglobulin superfamily, DCC subclass, member 3	NM_004884	NM_004884,NP_004875,XM_011522241,XM_011522242,XM_011522243,XM_011522244,XM_011522245,XP_011520543,XP_011520544,XP_011520545,XP_011520546,XP_011520547
ENSG00000237187	89.4241	1.16846	0.17706	6.59926	4.13218e-11	3.42353e-10	441094	1	441094	NR2F1 antisense RNA 1	NR2F1 antisense RNA 1	NR_015369	NR_015369,NR_021490,NR_021491,NR_109818,NR_109819,NR_109820,NR_109821,NR_109822,NR_109823,NR_109824,NR_109825
ENSG00000158286	387.622	1.16812	0.0927865	12.5894	2.41646e-36	6.3957e-35	388591	1	388591	ring finger protein 207	ring finger protein 207	NM_173795	NM_173795,NM_207396,NP_997279,XM_011541438,XM_011541439,XM_011541440,XP_011539740,XP_011539741,XP_011539742,XR_946651,XR_946652
ENSG00000270953	26.8179	1.16762	0.281712	4.14474	3.40202e-05	0.000153633	NA	0	NA	NA	NA	NA	NA
ENSG00000125462	189.133	1.1676	0.13328	8.76046	1.94448e-18	2.53031e-17	10485	1	10485	chromosome 1 open reading frame 61	chromosome 1 open reading frame 61	NM_006365	NM_006365,NP_006356,XM_005244832,XM_006711119,XM_011509067,XM_011509068,XM_011509069,XM_011509070,XM_011509071,XM_011509072,XM_011509073,XM_011509074,XP_005244889,XP_006711182,XP_011507369,XP_011507370,XP_011507371,XP_011507372,XP_011507373,XP_011507374,XP_011507375,XP_011507376
ENSG00000136383	16.3068	1.16704	0.29532	3.95178	7.75717e-05	0.000330351	57538	1	57538	alpha-kinase 3	alpha-kinase 3	NM_020778	NM_020778,NP_065829
ENSG00000137642	931.21	1.16639	0.0643835	18.1163	2.37056e-73	1.51128e-71	6653	1	6653	sortilin-related receptor, L(DLR class) A repeats containing	sortilin-related receptor, L(DLR class) A repeats containing	NM_003105	NM_003105,NP_003096,XM_011542963,XM_011542964,XM_011542965,XM_011542966,XM_011542967,XP_011541265,XP_011541266,XP_011541267,XP_011541268,XP_011541269
ENSG00000257514	98.9355	1.16603	0.180235	6.46948	9.8341e-11	7.94504e-10	NA	0	NA	NA	NA	NA	NA
ENSG00000012779	23.7008	1.16557	0.277748	4.19652	2.71053e-05	0.000124301	240	1	240	arachidonate 5-lipoxygenase	arachidonate 5-lipoxygenase	NM_000698	NM_000698,NM_001256153,NM_001256154,NP_000689,NP_001243082,NP_001243083,XM_011539564,XM_011546981,XP_011537866,XP_011545283
ENSG00000151364	4.67473	1.16553	0.300796	3.8748	0.000106713	0.000445691	65987	2	65987100532726	potassium channel tetramerization domain containing 14	potassium channel tetramerization domain containing 14	NM_001282406	NM_001282406,NM_023930,NP_001269335,NP_076419
ENSG00000179331	54.9092	1.16548	0.210784	5.52924	3.21613e-08	2.07867e-07	54734	1	54734	RAB39A, member RAS oncogene family	RAB39A, member RAS oncogene family	NM_017516	NM_017516,NP_059986
ENSG00000268333	4.22282	1.16514	0.291855	3.99219	6.54658e-05	0.000282467	NA	0	NA	NA	NA	NA	NA
ENSG00000154556	7.52665	1.1645	0.310197	3.75406	0.000173992	0.000703092	8470	1	8470	sorbin and SH3 domain containing 2	sorbin and SH3 domain containing 2	NM_001145670	NM_001145670,NM_001145671,NM_001145672,NM_001145673,NM_001145674,NM_001145675,NM_001270771,NM_003603,NM_021069,NP_001139142,NP_001139143,NP_001139144,NP_001139145,NP_001139146,NP_001139147,NP_001257700,NP_003594,NP_066547,XM_005263307,XM_005263308,XM_005263310,XM_005263311,XM_005263312,XM_005263313,XM_006714358,XM_006714359,XM_006714365,XM_006714366,XM_006714368,XM_006714369,XM_006714370,XM_00671…
ENSG00000106536	138.444	1.16385	0.155691	7.47538	7.69792e-14	7.81041e-13	11281	1	11281	POU class 6 homeobox 2	POU class 6 homeobox 2	NM_001166018	NM_001166018,NM_007252,NP_001159490,NP_009183,XM_011515113,XM_011515114,XP_011513415,XP_011513416
ENSG00000258732	39.7834	1.16365	0.301726	3.85665	0.000114949	0.000477704	NA	0	NA	NA	NA	NA	NA
ENSG00000241839	256.897	1.16325	0.108362	10.7348	6.98574e-27	1.32882e-25	80301	1	80301	pleckstrin homology domain containing, family O member 2	pleckstrin homology domain containing, family O member 2	NM_001195059	NM_001195059,NM_025201,NP_001181988,NP_079477
ENSG00000226383	15.6527	1.16267	0.304791	3.81464	0.000136381	0.000560202	101929378	1	101929378	uncharacterized LOC101929378	uncharacterized LOC101929378	NR_110249	NR_110249,NR_110250
ENSG00000260597	43.1729	1.16229	0.243881	4.76581	1.88095e-06	1.0027e-05	NA	0	NA	NA	NA	NA	NA
ENSG00000100234	13.5901	1.16194	0.307508	3.77855	0.000157746	0.000641652	7078	1	7078	TIMP metallopeptidase inhibitor 3	TIMP metallopeptidase inhibitor 3	NM_000362	NM_000362,NP_000353
ENSG00000270964	50.9429	1.161	0.228019	5.09168	3.54906e-07	2.0615e-06	NA	0	NA	NA	NA	NA	NA
ENSG00000108387	38.5994	1.15921	0.249469	4.64671	3.37277e-06	1.7474e-05	5414	1	5414	septin 4	septin 4	NM_001198713	NM_001198713,NM_001256782,NM_001256822,NM_004574,NM_080415,NM_080416,NM_080417,NP_001185642,NP_001243711,NP_001243751,NP_004565,NP_536340,NP_536341,NR_037155,NR_104196,NR_104197,XM_006721949,XM_006721950,XM_006721951,XM_006721952,XM_006721954,XM_006721955,XM_011524910,XM_011524911,XM_011524912,XP_006722012,XP_006722013,XP_006722014,XP_006722015,XP_006722017,XP_006722018,XP_011523212,XP_011523213,…
ENSG00000111674	1790.29	1.159	0.0515107	22.5002	4.12839e-112	5.22119e-110	2026	1	2026	enolase 2 (gamma, neuronal)	enolase 2 (gamma, neuronal)	NM_001975	NM_001975,NP_001966
ENSG00000185989	318.044	1.15884	0.101561	11.4103	3.71301e-30	7.86896e-29	22821	1	22821	RAS p21 protein activator 3	RAS p21 protein activator 3	NM_007368	NM_007368,NP_031394,XM_005266196,XM_011534841,XM_011534842,XM_011548883,XM_011548884,XM_011548885,XP_005266253,XP_011533143,XP_011533144,XP_011547185,XP_011547186,XP_011547187
ENSG00000177455	12.7653	1.15855	0.310955	3.72579	0.000194708	0.000780867	930	1	930	CD19 molecule	CD19 molecule	NM_001178098	NM_001178098,NM_001770,NP_001171569,NP_001761,XM_006721103,XM_011545981,XP_006721166,XP_011544283,XR_950871,XR_950872
ENSG00000228314	14.9409	1.15788	0.304806	3.79875	0.000145425	0.000595468	54055	1	54055	cytochrome P450, family 4, subfamily F, polypeptide 29, pseudogene	cytochrome P450, family 4, subfamily F, polypeptide 29, pseudogene	NR_026755	NR_026755
ENSG00000140323	42.4641	1.15685	0.228999	5.05179	4.37694e-07	2.52235e-06	85455	1	85455	dispatched homolog 2 (Drosophila)	dispatched homolog 2 (Drosophila)	NM_033510	NM_033510,NP_277045,XM_011522125,XP_011520427
ENSG00000260329	20.462	1.15629	0.281723	4.10435	4.05462e-05	0.000181318	NA	0	NA	NA	NA	NA	NA
ENSG00000261787	140.259	1.15552	0.146926	7.86468	3.70039e-15	4.0647e-14	100129654	1	100129654	transcription factor 24	transcription factor 24	NM_001193502	NM_001193502,NP_001180431,XM_011517433,XP_011515735
ENSG00000088305	918.701	1.15522	0.0622267	18.5647	6.20243e-77	4.29344e-75	1789	1	1789	DNA (cytosine-5-)-methyltransferase 3 beta	DNA (cytosine-5-)-methyltransferase 3 beta	NM_001207055	NM_001207055,NM_001207056,NM_006892,NM_175848,NM_175849,NM_175850,NP_001193984,NP_001193985,NP_008823,NP_787044,NP_787045,NP_787046,XM_011528653,XM_011528654,XP_011526955,XP_011526956,XR_936510,XR_936511,XR_936512
ENSG00000105928	68.9578	1.15506	0.194443	5.94039	2.84347e-09	2.03017e-08	1687	1	1687	deafness, autosomal dominant 5	deafness, autosomal dominant 5	NM_001127453	NM_001127453,NM_001127454,NM_004403,NP_001120925,NP_001120926,NP_004394
ENSG00000220785	10.2076	1.15313	0.31079	3.71032	0.000206999	0.000826336	NA	0	NA	NA	NA	NA	NA
ENSG00000176463	185.66	1.15283	0.123601	9.32702	1.08891e-20	1.59432e-19	28232	1	28232	solute carrier organic anion transporter family, member 3A1	solute carrier organic anion transporter family, member 3A1	NM_001145044	NM_001145044,NM_013272,NP_001138516,NP_037404,XM_005254889,XM_005254891,XM_011521456,XM_011521457,XP_005254946,XP_005254948,XP_011519758,XP_011519759,XR_429450,XR_931795,XR_931796
ENSG00000186684	77.2245	1.15261	0.1824	6.31912	2.63065e-10	2.04828e-09	339761	1	339761	cytochrome P450, family 27, subfamily C, polypeptide 1	cytochrome P450, family 27, subfamily C, polypeptide 1	NM_001001665	NM_001001665,NP_001001665,XM_006712483,XP_006712546
ENSG00000144649	96.4269	1.15112	0.179346	6.41843	1.37688e-10	1.09836e-09	729085	1	729085	family with sequence similarity 198, member A	family with sequence similarity 198, member A	NM_001129908	NM_001129908,NP_001123380
ENSG00000143434	130.791	1.15095	0.153292	7.5082	5.9947e-14	6.14628e-13	10500	1	10500	sema domain, transmembrane domain (TM), and cytoplasmic domain, (semaphorin) 6C	sema domain, transmembrane domain (TM), and cytoplasmic domain, (semaphorin) 6C	NM_001178061	NM_001178061,NM_001178062,NM_030913,NP_001171532,NP_001171533,NP_112175,XM_005244835,XM_011509075,XP_005244892,XP_011507377
ENSG00000128298	10.0755	1.14782	0.310468	3.69707	0.000218103	0.000867554	80115	1	80115	BAI1-associated protein 2-like 2	BAI1-associated protein 2-like 2	NM_025045	NM_025045,NP_079321,XM_005261751,XM_011530379,XM_011530380,XM_011530381,XM_011530382,XM_011530383,XM_011530384,XM_011530385,XM_011530386,XM_011530387,XM_011530388,XP_005261808,XP_011528681,XP_011528682,XP_011528683,XP_011528684,XP_011528685,XP_011528686,XP_011528687,XP_011528688,XP_011528689,XP_011528690
ENSG00000160505	4.84285	1.14726	0.298933	3.83785	0.000124118	0.000512347	147945	1	147945	NLR family, pyrin domain containing 4	NLR family, pyrin domain containing 4	NM_134444	NM_134444,NP_604393,XM_006723042,XM_006723043,XM_011526515,XM_011526516,XP_006723105,XP_006723106,XP_011524817,XP_011524818
ENSG00000142102	116	1.1466	0.152779	7.50495	6.14503e-14	6.29765e-13	80162	1	80162	ATH1, acid trehalase-like 1 (yeast)	ATH1, acid trehalase-like 1 (yeast)	NM_025092	NM_025092,NP_079368,XM_011520383,XM_011520384,XM_011520385,XM_011520386,XM_011520387,XP_011518685,XP_011518686,XP_011518687,XP_011518688,XP_011518689,XR_428856,XR_930912
ENSG00000133216	233.239	1.14566	0.115378	9.92955	3.0966e-23	5.09861e-22	2048	1	2048	EPH receptor B2	EPH receptor B2	NM_001309192	NM_001309192,NM_001309193,NM_004442,NM_017449,NP_001296121,NP_001296122,NP_004433,NP_059145,XM_006710441,XM_006710442,XM_011540976,XP_006710504,XP_006710505,XP_011539278
ENSG00000151117	21.6523	1.14493	0.281692	4.06447	4.8141e-05	0.00021268	144110	1	144110	transmembrane protein 86A	transmembrane protein 86A	NM_153347	NM_153347,NP_699178
ENSG00000009694	85.0975	1.14316	0.184935	6.18145	6.35172e-10	4.79237e-09	10178	1	10178	teneurin transmembrane protein 1	teneurin transmembrane protein 1	NM_001163278	NM_001163278,NM_001163279,NM_014253,NP_001156750,NP_001156751,NP_055068,XM_011531230,XM_011531231,XM_011531232,XM_011531233,XM_011531234,XM_011531235,XM_011531236,XM_011531237,XP_011529532,XP_011529533,XP_011529534,XP_011529535,XP_011529536,XP_011529537,XP_011529538,XP_011529539
ENSG00000169758	34.4474	1.14212	0.247415	4.61619	3.90844e-06	2.01157e-05	123591	1	123591	chromosome 15 open reading frame 27	chromosome 15 open reading frame 27	NM_152335	NM_152335,NP_689548,XM_005254160,XM_011521223,XM_011521224,XM_011521225,XP_005254217,XP_011519525,XP_011519526,XP_011519527
ENSG00000132906	159.436	1.14187	0.139393	8.19171	2.57541e-16	2.99785e-15	842	1	842	caspase 9, apoptosis-related cysteine peptidase	caspase 9, apoptosis-related cysteine peptidase	NM_001229	NM_001229,NM_001278054,NM_032996,NP_001220,NP_001264983,NP_127463,NR_102732,NR_102733,XM_005246014,XM_011542270,XM_011542271,XM_011542272,XM_011542273,XP_005246071,XP_011540572,XP_011540573,XP_011540574,XP_011540575,XR_946778
ENSG00000163071	16.406	1.14182	0.309948	3.6839	0.000229695	0.000910412	132671	1	132671	spermatogenesis associated 18	spermatogenesis associated 18	NM_001297608	NM_001297608,NM_145263,NP_001284537,NP_660306,NR_123728,XM_005265716,XM_005265717,XM_005265718,XM_011534369,XM_011534370,XM_011534371,XM_011534372,XP_005265773,XP_005265774,XP_005265775,XP_011532671,XP_011532672,XP_011532673,XP_011532674,XR_941044
ENSG00000167889	102.969	1.14173	0.170735	6.68717	2.27528e-11	1.92322e-10	146664	1	146664	mannosyl (alpha-1,6-)-glycoprotein beta-1,6-N-acetyl-glucosaminyltransferase, isozyme B	mannosyl (alpha-1,6-)-glycoprotein beta-1,6-N-acetyl-glucosaminyltransferase, isozyme B	NM_001199172	NM_001199172,NM_144677,NM_198955,NP_001186101,NP_653278,NP_945193,XM_005257065,XM_006721707,XM_011524348,XM_011524349,XM_011524350,XM_011524351,XM_011524352,XM_011524353,XM_011524354,XP_005257122,XP_006721770,XP_011522650,XP_011522651,XP_011522652,XP_011522653,XP_011522654,XP_011522655,XP_011522656,XR_934377
ENSG00000188522	243.05	1.14071	0.114185	9.99004	1.68515e-23	2.80224e-22	644815	1	644815	family with sequence similarity 83, member G	family with sequence similarity 83, member G	NM_001039999	NM_001039999,NP_001035088
ENSG00000173930	48.1937	1.1395	0.223704	5.09378	3.50994e-07	2.0403e-06	353189	1	353189	solute carrier organic anion transporter family, member 4C1	solute carrier organic anion transporter family, member 4C1	NM_180991	NM_180991,NP_851322,XM_011543370,XM_011543371,XM_011543372,XP_011541672,XP_011541673,XP_011541674
ENSG00000250251	103.838	1.13833	0.168672	6.74878	1.49096e-11	1.27968e-10	NA	0	NA	NA	NA	NA	NA
ENSG00000092758	259.811	1.13824	0.122356	9.30267	1.36958e-20	1.99652e-19	1299	1	1299	collagen, type IX, alpha 3	collagen, type IX, alpha 3	NM_001853	NM_001853,NP_001844,XM_011528543,XM_011528544,XM_011528545,XM_011528546,XM_011528547,XP_011526845,XP_011526846,XP_011526847,XP_011526848,XP_011526849,XR_936499
ENSG00000135423	17.4053	1.13824	0.299063	3.80601	0.000141226	0.000579166	27165	1	27165	glutaminase 2 (liver, mitochondrial)	glutaminase 2 (liver, mitochondrial)	NM_001280796	NM_001280796,NM_001280797,NM_001280798,NM_013267,NM_138566,NP_001267725,NP_001267726,NP_001267727,NP_037399,XM_005268797,XP_005268854
ENSG00000280195	52.801	1.13722	0.217432	5.23026	1.6927e-07	1.01994e-06	NA	0	NA	NA	NA	NA	NA
ENSG00000117480	36.1023	1.13711	0.252979	4.49488	6.96094e-06	3.47036e-05	2166	1	2166	fatty acid amide hydrolase	fatty acid amide hydrolase	NM_001441	NM_001441,NP_001432
ENSG00000121101	22.2169	1.13569	0.283783	4.00197	6.28174e-05	0.000271872	56155	1	56155	testis expressed 14	testis expressed 14	NM_001201457	NM_001201457,NM_031272,NM_198393,NP_001188386,NP_112562,NP_938207,XM_011525028,XM_011525029,XM_011525030,XM_011525031,XM_011525032,XM_011525033,XP_011523330,XP_011523331,XP_011523332,XP_011523333,XP_011523334,XP_011523335
ENSG00000124749	9.63535	1.1345	0.311018	3.6477	0.000264601	0.00104013	81578	1	81578	collagen, type XXI, alpha 1	collagen, type XXI, alpha 1	NM_030820	NM_030820,NP_110447,XM_006715223,XM_006715225,XM_011514923,XM_011514924,XM_011514925,XM_011514926,XM_011514927,XP_006715286,XP_006715288,XP_011513225,XP_011513226,XP_011513227,XP_011513228,XP_011513229,XR_241922,XR_926314
ENSG00000123496	7.80038	1.13389	0.309494	3.6637	0.000248599	0.000980357	3598	1	3598	interleukin 13 receptor, alpha 2	interleukin 13 receptor, alpha 2	NM_000640	NM_000640,NP_000631
ENSG00000248485	34.4077	1.13326	0.246403	4.59922	4.24076e-06	2.17447e-05	654790	1	654790	Purkinje cell protein 4 like 1	Purkinje cell protein 4 like 1	NM_001102566	NM_001102566,NP_001096036
ENSG00000254402	22.4656	1.13236	0.284804	3.97593	7.01041e-05	0.000300849	441381	1	441381	leucine rich repeat containing 24	leucine rich repeat containing 24	NM_001024678	NM_001024678,NP_001019849
ENSG00000227743	7.31643	1.13234	0.308979	3.66478	0.000247552	0.000976561	NA	0	NA	NA	NA	NA	NA
ENSG00000188910	5.38042	1.12983	0.301231	3.75071	0.000176336	0.000711458	2707	1	2707	gap junction protein, beta 3, 31kDa	gap junction protein, beta 3, 31kDa	NM_001005752	NM_001005752,NM_024009,NP_001005752,NP_076872
ENSG00000197943	201.487	1.12938	0.130863	8.63026	6.12124e-18	7.77517e-17	5336	1	5336	phospholipase C, gamma 2 (phosphatidylinositol-specific)	phospholipase C, gamma 2 (phosphatidylinositol-specific)	NM_002661	NM_002661,NP_002652,XM_011523108,XP_011521410
ENSG00000170011	335.203	1.12865	0.0988522	11.4175	3.41853e-30	7.26461e-29	25924	1	25924	myosin VIIA and Rab interacting protein	myosin VIIA and Rab interacting protein	NM_001284423	NM_001284423,NM_001284424,NM_001284425,NM_001284426,NM_015460,NP_001271352,NP_001271353,NP_001271354,NP_001271355,NP_056275,NR_104316,XM_011533575,XP_011531877
ENSG00000143382	81.987	1.12855	0.194726	5.7956	6.80762e-09	4.67914e-08	54507	1	54507	ADAMTS-like 4	ADAMTS-like 4	NM_001288607	NM_001288607,NM_001288608,NM_019032,NM_025008,NP_001275536,NP_001275537,NP_061905,NP_079284,XM_011509644,XM_011509645,XM_011509646,XM_011509647,XM_011509648,XM_011509649,XM_011509650,XM_011509651,XM_011509652,XP_011507946,XP_011507947,XP_011507948,XP_011507949,XP_011507950,XP_011507951,XP_011507952,XP_011507953,XP_011507954,XR_921844
ENSG00000139832	123.148	1.12795	0.149518	7.54392	4.5606e-14	4.69236e-13	55647	1	55647	RAB20, member RAS oncogene family	RAB20, member RAS oncogene family	NM_017817	NM_017817,NP_060287
ENSG00000184497	17.9061	1.1264	0.292935	3.84522	0.000120445	0.000498857	348013	1	348013	transmembrane protein 255B	transmembrane protein 255B	NM_182614	NM_182614,NP_872420,XM_005272413,XM_005272414,XM_005272415,XM_005272416,XM_006719982,XM_006719983,XM_006719984,XM_006719985,XM_006719986,XM_006719987,XM_006719988,XM_006719989,XM_006719990,XP_005272470,XP_005272471,XP_005272472,XP_005272473,XP_006720045,XP_006720046,XP_006720047,XP_006720048,XP_006720049,XP_006720050,XP_006720051,XP_006720052,XP_006720053,XR_941408
ENSG00000187537	3.3479	1.12639	0.282726	3.98404	6.77521e-05	0.00029145	404785	2	404785641455	POTE ankyrin domain family, member G	POTE ankyrin domain family, member G	NM_001005356	NM_001005356,NM_001005357,NM_207513,NP_001005356,NR_027480
ENSG00000278910	4.71551	1.12593	0.299307	3.76179	0.000168704	0.000683018	NA	0	NA	NA	NA	NA	NA
ENSG00000255020	9.64251	1.1256	0.310431	3.62591	0.000287942	0.00112564	NA	0	NA	NA	NA	NA	NA
ENSG00000124466	11.4099	1.1245	0.307359	3.65861	0.00025359	0.000998863	27076	1	27076	LY6/PLAUR domain containing 3	LY6/PLAUR domain containing 3	NM_014400	NM_014400,NP_055215
ENSG00000198417	272.945	1.12301	0.116343	9.65266	4.7896e-22	7.46087e-21	4494	1	4494	metallothionein 1F	metallothionein 1F	NM_001301272	NM_001301272,NM_005949,NP_001288201,NP_005940
ENSG00000259485	9.0009	1.12251	0.310867	3.6109	0.000305132	0.00118769	NA	0	NA	NA	NA	NA	NA
ENSG00000271369	10.0976	1.12195	0.310317	3.61548	0.000299787	0.00116844	NA	0	NA	NA	NA	NA	NA
ENSG00000264734	6.33817	1.12173	0.304697	3.68147	0.000231895	0.000918512	NA	0	NA	NA	NA	NA	NA
ENSG00000164764	13.8247	1.12118	0.302505	3.70632	0.000210294	0.00083849	157869	1	157869	somatomedin B and thrombospondin, type 1 domain containing	somatomedin B and thrombospondin, type 1 domain containing	NM_153225	NM_153225,NP_694957,XM_005251178,XM_011517475,XP_005251235,XP_011515777,XR_928762
ENSG00000111012	69.1322	1.12034	0.198479	5.64463	1.6554e-08	1.09627e-07	1594	1	1594	cytochrome P450, family 27, subfamily B, polypeptide 1	cytochrome P450, family 27, subfamily B, polypeptide 1	NM_000785	NM_000785,NP_000776
ENSG00000137872	66.6197	1.11982	0.196514	5.69843	1.20916e-08	8.11151e-08	80031	1	80031	sema domain, transmembrane domain (TM), and cytoplasmic domain, (semaphorin) 6D	sema domain, transmembrane domain (TM), and cytoplasmic domain, (semaphorin) 6D	NM_001198999	NM_001198999,NM_020858,NM_024966,NM_153616,NM_153617,NM_153618,NM_153619,NP_001185928,NP_065909,NP_079242,NP_705869,NP_705870,NP_705871,NP_705872,XM_005254685,XM_005254686,XM_005254687,XM_005254689,XM_011522075,XM_011522076,XM_011522077,XM_011522078,XM_011522079,XM_011522080,XM_011522081,XM_011522082,XP_005254742,XP_005254743,XP_005254744,XP_005254746,XP_011520377,XP_011520378,XP_011520379,XP_011…
ENSG00000119508	109.766	1.11884	0.16633	6.72663	1.73638e-11	1.48055e-10	8013	1	8013	nuclear receptor subfamily 4, group A, member 3	nuclear receptor subfamily 4, group A, member 3	NM_006981	NM_006981,NM_173198,NM_173199,NM_173200,NP_008912,NP_775291,NP_775292,XM_005252237,XM_011519048,XM_011519049,XP_005252294,XP_011517350,XP_011517351
ENSG00000183638	16.5593	1.1186	0.297591	3.75885	0.000170693	0.000690236	94137	1	94137	retinitis pigmentosa 1-like 1	retinitis pigmentosa 1-like 1	NM_178857	NM_178857,NP_849188
ENSG00000112619	3.67103	1.11855	0.287818	3.8863	0.000101782	0.00042662	5961	1	5961	peripherin 2 (retinal degeneration, slow)	peripherin 2 (retinal degeneration, slow)	NM_000322	NM_000322,NP_000313,XR_427834,XR_926295
ENSG00000247121	23.8125	1.11789	0.273357	4.08949	4.3233e-05	0.000192305	NA	0	NA	NA	NA	NA	NA
ENSG00000170837	646.903	1.11728	0.075765	14.7467	3.23177e-49	1.19832e-47	2850	1	2850	G protein-coupled receptor 27	G protein-coupled receptor 27	NM_018971	NM_018971,NP_061844
ENSG00000178718	2141.93	1.11694	0.0463563	24.0946	2.84709e-128	4.47069e-126	54913	1	54913	ribonuclease P/MRP 25kDa subunit	ribonuclease P/MRP 25kDa subunit	NM_017793	NM_017793,NP_060263
ENSG00000275582	16.1849	1.11675	0.300499	3.71631	0.000202152	0.000808921	NA	0	NA	NA	NA	NA	NA
ENSG00000165338	280.444	1.11649	0.108512	10.289	7.89548e-25	1.39419e-23	143279	1	143279	HECT domain containing E3 ubiquitin protein ligase 2	HECT domain containing E3 ubiquitin protein ligase 2	NM_001284274	NM_001284274,NM_173497,NM_182765,NP_001271203,NP_775768,NP_877497,NR_104291,XM_011539336,XM_011539337,XM_011539338,XM_011539339,XP_011537638,XP_011537639,XP_011537640,XP_011537641,XR_945607
ENSG00000231646	13.2037	1.11566	0.308317	3.61854	0.000296266	0.00115606	NA	0	NA	NA	NA	NA	NA
ENSG00000277363	96.1053	1.11489	0.170841	6.52592	6.75844e-11	5.52313e-10	80725	1	80725	SRC kinase signaling inhibitor 1	SRC kinase signaling inhibitor 1	NM_025248	NM_025248,NP_079524
ENSG00000092929	7.25516	1.11452	0.310945	3.58431	0.000337967	0.00130507	201294	1	201294	unc-13 homolog D (C. elegans)	unc-13 homolog D (C. elegans)	NM_199242	NM_199242,NP_954712,XM_011524504,XM_011524505,XM_011524506,XM_011524507,XM_011524508,XP_011522806,XP_011522807,XP_011522808,XP_011522809,XP_011522810
ENSG00000124212	5.10781	1.11409	0.300043	3.71311	0.000204727	0.000818295	5740	1	5740	prostaglandin I2 (prostacyclin) synthase	prostaglandin I2 (prostacyclin) synthase	NM_000961	NM_000961,NP_000952
ENSG00000271347	3.30527	1.11304	0.276194	4.02991	5.57976e-05	0.000243699	NA	0	NA	NA	NA	NA	NA
ENSG00000187172	23.8439	1.11181	0.307337	3.61755	0.0002974	0.00115971	NA	0	NA	NA	NA	NA	NA
ENSG00000267191	8.62471	1.10919	0.310627	3.57081	0.000355882	0.00136869	NA	0	NA	NA	NA	NA	NA
ENSG00000144681	176.786	1.10871	0.127471	8.69779	3.38418e-18	4.36252e-17	6769	1	6769	SH3 and cysteine rich domain	SH3 and cysteine rich domain	NM_001292049	NM_001292049,NM_003149,NP_001278978,NP_003140,XM_011534036,XM_011534037,XM_011534038,XP_011532338,XP_011532339,XP_011532340,XR_940496
ENSG00000100604	5.06092	1.10848	0.298533	3.7131	0.00020474	0.000818295	1113	1	1113	chromogranin A	chromogranin A	NM_001275	NM_001275,NM_001301690,NP_001266,NP_001288619,XM_011536370,XM_011546640,XP_011534672,XP_011544942
ENSG00000116661	111.385	1.10786	0.158549	6.98751	2.79807e-12	2.5414e-11	26232	1	26232	F-box protein 2	F-box protein 2	NM_012168	NM_012168,NP_036300
ENSG00000269067	60.9341	1.10775	0.218836	5.06199	4.14894e-07	2.39651e-06	388523	1	388523	zinc finger protein 728	zinc finger protein 728	NM_001267716	NM_001267716,NP_001254645,XM_011528009,XP_011526311
ENSG00000256008	34.9167	1.10607	0.245581	4.50391	6.67155e-06	3.33463e-05	NA	0	NA	NA	NA	NA	NA
ENSG00000149591	29.8601	1.10533	0.256479	4.30963	1.63529e-05	7.75925e-05	6876	1	6876	transgelin	transgelin	NM_001001522	NM_001001522,NM_003186,NP_001001522,NP_003177
ENSG00000140876	58.0076	1.10525	0.22173	4.98468	6.2065e-07	3.51181e-06	283927	1	283927	nudix (nucleoside diphosphate linked moiety X)-type motif 7	nudix (nucleoside diphosphate linked moiety X)-type motif 7	NM_001105663	NM_001105663,NM_001243657,NM_001243660,NM_001243661,NP_001099133,NP_001230586,NP_001230589,NP_001230590,XM_011523032,XM_011523033,XP_011521334,XP_011521335
ENSG00000136842	80.465	1.10237	0.185852	5.93145	3.00276e-09	2.13608e-08	7111	1	7111	tropomodulin 1	tropomodulin 1	NM_001166116	NM_001166116,NM_003275,NP_001159588,NP_003266
ENSG00000135919	261.942	1.1022	0.111991	9.84188	7.43064e-23	1.1957e-21	5270	1	5270	serpin peptidase inhibitor, clade E (nexin, plasminogen activator inhibitor type 1), member 2	serpin peptidase inhibitor, clade E (nexin, plasminogen activator inhibitor type 1), member 2	NM_001136528	NM_001136528,NM_001136530,NM_006216,NP_001130000,NP_001130002,NP_006207,NR_073116,XM_005246641,XM_005246642,XP_005246698,XP_005246699
ENSG00000196083	273.663	1.10217	0.107538	10.2492	1.19337e-24	2.09149e-23	3556	1	3556	interleukin 1 receptor accessory protein	interleukin 1 receptor accessory protein	NM_001167928	NM_001167928,NM_001167929,NM_001167930,NM_001167931,NM_002182,NM_134470,NP_001161400,NP_001161401,NP_001161402,NP_001161403,NP_002173,NP_608273,XM_005247433,XM_005247434,XM_011512794,XP_005247490,XP_005247491,XP_011511096
ENSG00000106123	132.582	1.10213	0.147385	7.47788	7.55319e-14	7.66917e-13	2051	1	2051	EPH receptor B6	EPH receptor B6	NM_001280794	NM_001280794,NM_001280795,NM_004445,NP_001267723,NP_001267724,NP_004436,NR_104001,XM_006715881,XM_011515879,XM_011515880,XM_011515881,XM_011515882,XM_011546506,XM_011546507,XM_011546508,XM_011546509,XM_011546510,XM_011546511,XP_006715944,XP_011514181,XP_011514182,XP_011514183,XP_011514184,XP_011544808,XP_011544809,XP_011544810,XP_011544811,XP_011544812,XP_011544813
ENSG00000267745	10.2816	1.10194	0.310913	3.54421	0.00039379	0.00150032	NA	0	NA	NA	NA	NA	NA
ENSG00000104518	11.9448	1.10184	0.304788	3.6151	0.000300226	0.00116995	79792	1	79792	gasdermin D	gasdermin D	NM_001166237	NM_001166237,NM_024736,NP_001159709,NP_079012,XM_011517301,XM_011546546,XP_011515603,XP_011544848
ENSG00000278709	10.6824	1.10184	0.310079	3.55342	0.00038026	0.00145375	105416157	1	105416157	NF-kappaB interacting long non-coding RNA	NF-kappaB interacting long non-coding RNA	NR_131157	NR_131157
ENSG00000196155	847.413	1.10126	0.0716517	15.3696	2.6163e-53	1.06274e-51	25894	1	25894	pleckstrin homology domain containing, family G (with RhoGef domain) member 4	pleckstrin homology domain containing, family G (with RhoGef domain) member 4	NM_001129727	NM_001129727,NM_001129728,NM_001129729,NM_001129731,NM_015432,NP_001123199,NP_001123200,NP_001123201,NP_001123203,XM_011522985,XM_011522986,XM_011522987,XM_011522988,XM_011522989,XP_011521287,XP_011521288,XP_011521289,XP_011521290,XP_011521291,XR_933268
ENSG00000261934	28.0104	1.10119	0.275973	3.9902	6.60165e-05	0.000284507	56107	1	56107	protocadherin gamma subfamily A, 9	protocadherin gamma subfamily A, 9	NM_018921	NM_018921,NM_032089,NP_061744,NP_114478
ENSG00000167377	27.9242	1.10009	0.265321	4.14627	3.37931e-05	0.000152755	7571	1	7571	zinc finger protein 23	zinc finger protein 23	NM_001304492	NM_001304492,NM_001304493,NM_001304494,NM_145911,NP_001291421,NP_001291422,NP_001291423,NP_666016
ENSG00000155760	778.696	1.09985	0.0740652	14.8498	6.98231e-50	2.65203e-48	8324	1	8324	frizzled class receptor 7	frizzled class receptor 7	NM_003507	NM_003507,NP_003498
ENSG00000164736	32.7389	1.09979	0.304816	3.60805	0.000308506	0.00120042	64321	1	64321	SRY (sex determining region Y)-box 17	SRY (sex determining region Y)-box 17	NM_022454	NM_022454,NP_071899
ENSG00000100968	137.967	1.09857	0.147817	7.43196	1.07002e-13	1.07772e-12	4776	1	4776	nuclear factor of activated T-cells, cytoplasmic, calcineurin-dependent 4	nuclear factor of activated T-cells, cytoplasmic, calcineurin-dependent 4	NM_001136022	NM_001136022,NM_001198965,NM_001198966,NM_001198967,NM_001288802,NM_004554,NP_001129494,NP_001185894,NP_001185895,NP_001185896,NP_001275731,NP_004545,XM_011536797,XM_011536798,XM_011536799,XP_011535099,XP_011535100,XP_011535101
ENSG00000107242	13.6789	1.09841	0.305983	3.58979	0.00033095	0.00127924	8395	1	8395	phosphatidylinositol-4-phosphate 5-kinase, type I, beta	phosphatidylinositol-4-phosphate 5-kinase, type I, beta	NM_001031687	NM_001031687,NM_001278253,NM_003558,NP_001265182,NP_003549,XM_005252261,XM_005252262,XM_006717300,XM_006717301,XM_011519082,XM_011519083,XM_011519084,XM_011519085,XP_005252318,XP_005252319,XP_006717363,XP_006717364,XP_011517384,XP_011517385,XP_011517386,XP_011517387
ENSG00000173988	13.9269	1.09797	0.301882	3.63707	0.000275753	0.0010807	220416	1	220416	leucine rich repeat containing 63	leucine rich repeat containing 63	NM_001024609	NM_001024609,NM_001282460,NP_001269389,XM_011534981,XM_011534982,XM_011534983,XM_011534984,XM_011534985,XM_011534986,XM_011534987,XM_011534988,XM_011534989,XM_011534990,XM_011534991,XM_011534992,XM_011534993,XP_011533283,XP_011533284,XP_011533285,XP_011533286,XP_011533287,XP_011533288,XP_011533289,XP_011533290,XP_011533291,XP_011533292,XP_011533293,XP_011533294,XP_011533295,XR_941517,XR_941518,XR…
ENSG00000279712	7.77191	1.09778	0.308531	3.55809	0.000373568	0.0014315	NA	0	NA	NA	NA	NA	NA
ENSG00000234296	5.65817	1.09754	0.30193	3.6351	0.000277877	0.00108848	NA	0	NA	NA	NA	NA	NA
ENSG00000159239	14.9723	1.09753	0.299497	3.66458	0.000247746	0.00097716	388963	1	388963	chromosome 2 open reading frame 81	chromosome 2 open reading frame 81	NM_001145054	NM_001145054,NP_001138526
ENSG00000006327	63.3592	1.09735	0.199877	5.49013	4.01633e-08	2.57523e-07	51330	1	51330	tumor necrosis factor receptor superfamily, member 12A	tumor necrosis factor receptor superfamily, member 12A	NM_016639	NM_016639,NP_057723
ENSG00000168016	20.278	1.09561	0.280817	3.9015	9.55984e-05	0.00040207	9881	1	9881	tetratricopeptide repeat and ankyrin repeat containing 1	tetratricopeptide repeat and ankyrin repeat containing 1	NM_014831	NM_014831,NP_055646,XM_006713432,XM_011534289,XM_011534290,XM_011534291,XM_011534292,XM_011534293,XM_011534294,XP_006713495,XP_011532591,XP_011532592,XP_011532593,XP_011532594,XP_011532595,XP_011532596,XR_940526
ENSG00000121743	193.949	1.09484	0.125247	8.74141	2.30215e-18	2.98743e-17	2700	1	2700	gap junction protein, alpha 3, 46kDa	gap junction protein, alpha 3, 46kDa	NM_021954	NM_021954,NP_068773,XM_005266353,XM_011535048,XP_005266410,XP_011533350
ENSG00000108852	421.947	1.09427	0.0925005	11.8299	2.73555e-32	6.30578e-31	4355	1	4355	membrane protein, palmitoylated 2 (MAGUK p55 subfamily member 2)	membrane protein, palmitoylated 2 (MAGUK p55 subfamily member 2)	NM_001278370	NM_001278370,NM_001278371,NM_001278372,NM_001278373,NM_001278374,NM_001278375,NM_001278376,NM_001278381,NM_005374,NP_001265299,NP_001265300,NP_001265301,NP_001265302,NP_001265303,NP_001265304,NP_001265305,NP_001265310,NP_005365,XM_011524824,XM_011524825,XM_011524826,XM_011524827,XP_011523126,XP_011523127,XP_011523128,XP_011523129
ENSG00000184905	99.4142	1.09139	0.177653	6.14337	8.07888e-10	6.03517e-09	140597	1	140597	transcription elongation factor A (SII)-like 2	transcription elongation factor A (SII)-like 2	NM_080390	NM_080390,NP_525129
ENSG00000131721	2.56145	1.09126	0.261654	4.17061	3.03782e-05	0.000138361	84528	1	84528	Rhox homeobox family, member 2	Rhox homeobox family, member 2	NM_032498	NM_032498,NP_115887,XM_005262484,XP_005262541
ENSG00000155754	5.0186	1.09105	0.299009	3.64887	0.0002634	0.00103558	151254	1	151254	amyotrophic lateral sclerosis 2 (juvenile) chromosome region, candidate 11	amyotrophic lateral sclerosis 2 (juvenile) chromosome region, candidate 11	NM_001168216	NM_001168216,NM_001168217,NM_001168221,NM_152525,NP_001161688,NP_001161689,NP_001161693,NP_689738,XM_005246347,XM_006712331,XM_006712332,XM_006712333,XM_006712334,XM_006712335,XM_006712336,XM_011510736,XP_005246404,XP_006712394,XP_006712395,XP_006712396,XP_006712397,XP_006712398,XP_006712399,XP_011509038,XR_922875,XR_922876
ENSG00000177272	7.42356	1.09104	0.307706	3.54573	0.00039152	0.00149314	3738	1	3738	potassium channel, voltage gated shaker related subfamily A, member 3	potassium channel, voltage gated shaker related subfamily A, member 3	NM_002232	NM_002232,NP_002223,NR_109845,NR_109846
ENSG00000274220	4.35861	1.0899	0.295807	3.68451	0.000229144	0.000908384	NA	0	NA	NA	NA	NA	NA
ENSG00000254815	45.319	1.08881	0.237437	4.58569	4.52494e-06	2.31157e-05	NA	0	NA	NA	NA	NA	NA
ENSG00000099365	40.6619	1.08857	0.247759	4.39366	1.11459e-05	5.41261e-05	112755	1	112755	syntaxin 1B	syntaxin 1B	NM_052874	NM_052874,NP_443106
ENSG00000168672	361.524	1.08808	0.096603	11.2635	1.98788e-29	4.11232e-28	157638	1	157638	family with sequence similarity 84, member B	family with sequence similarity 84, member B	NM_174911	NM_174911,NP_777571,XR_242379
ENSG00000135547	28.8653	1.08774	0.281393	3.86555	0.000110841	0.000461779	23493	1	23493	hes-related family bHLH transcription factor with YRPW motif 2	hes-related family bHLH transcription factor with YRPW motif 2	NM_012259	NM_012259,NP_036391,XM_005266878,XM_011535649,XM_011535650,XP_005266935,XP_011533951,XP_011533952
ENSG00000149403	81.8001	1.08732	0.189101	5.74997	8.92595e-09	6.05686e-08	2900	1	2900	glutamate receptor, ionotropic, kainate 4	glutamate receptor, ionotropic, kainate 4	NM_001282470	NM_001282470,NM_001282473,NM_014619,NP_001269399,NP_001269402,NP_055434,XM_011542783,XM_011542784,XM_011542785,XM_011542786,XM_011542787,XM_011542788,XP_011541085,XP_011541086,XP_011541087,XP_011541088,XP_011541089,XP_011541090
ENSG00000182648	8.28169	1.08654	0.309677	3.50861	0.000450451	0.00169905	129790	2	129790100506380	chromosome 7 open reading frame 13	chromosome 7 open reading frame 13	NM_032625	NM_032625,NR_026865
ENSG00000174599	138.581	1.08652	0.151694	7.16258	7.91723e-13	7.49047e-12	133022	1	133022	translocation associated membrane protein 1-like 1	translocation associated membrane protein 1-like 1	NM_152402	NM_152402,NP_689615
ENSG00000114626	25.5358	1.08625	0.28096	3.86622	0.000110533	0.000460661	80325	1	80325	ankyrin repeat and BTB (POZ) domain containing 1	ankyrin repeat and BTB (POZ) domain containing 1	NM_032548	NM_032548,NM_172027,NM_172028,NP_115937,NP_742024,NR_033429,XM_006713769,XM_006713772,XM_011513212,XM_011513213,XP_006713832,XP_006713835,XP_011511514,XP_011511515,XR_924182,XR_924183
ENSG00000159374	2.70063	1.08611	0.265394	4.09245	4.26845e-05	0.000190082	130951	1	130951	meiosis 1 associated protein	meiosis 1 associated protein	NM_001281295	NM_001281295,NM_001281296,NM_138804,NP_001268224,NP_001268225,NP_620159,XM_005264150,XM_005264152,XM_006711946,XM_006711947,XM_011532548,XM_011532549,XM_011532550,XM_011532551,XM_011532552,XM_011532553,XM_011532554,XP_005264207,XP_005264209,XP_006712009,XP_006712010,XP_011530850,XP_011530851,XP_011530852,XP_011530853,XP_011530854,XP_011530855,XP_011530856
ENSG00000177301	9.12431	1.0854	0.310982	3.49025	0.000482568	0.0018094	3737	1	3737	potassium channel, voltage gated shaker related subfamily A, member 2	potassium channel, voltage gated shaker related subfamily A, member 2	NM_001204269	NM_001204269,NM_004974,NP_001191198,NP_004965,XM_011541396,XM_011541397,XM_011541398,XM_011541399,XM_011541400,XP_011539698,XP_011539699,XP_011539700,XP_011539701,XP_011539702
ENSG00000169894	67.5673	1.08393	0.194783	5.5648	2.6245e-08	1.70761e-07	4584	1	4584	mucin 3A, cell surface associated	mucin 3A, cell surface associated	NM_005960	NM_005960,NP_005951,XM_011516246,XM_011516247,XM_011516248,XM_011516249,XM_011516250,XM_011516251,XP_011514548,XP_011514549,XP_011514550,XP_011514551,XP_011514552,XP_011514553
ENSG00000157111	20.7881	1.08279	0.283266	3.82254	0.000132085	0.000543509	134285	1	134285	transmembrane protein 171	transmembrane protein 171	NM_001161342	NM_001161342,NM_173490,NP_001154814,NP_775761,XM_011543156,XM_011543157,XP_011541458,XP_011541459
ENSG00000070778	112.556	1.08216	0.166383	6.50402	7.82033e-11	6.35541e-10	11099	1	11099	protein tyrosine phosphatase, non-receptor type 21	protein tyrosine phosphatase, non-receptor type 21	NM_007039	NM_007039,NP_008970,XM_005267287,XM_006720011,XM_011536367,XM_011536368,XM_011536369,XP_005267344,XP_006720074,XP_011534669,XP_011534670,XP_011534671
ENSG00000262456	10.3194	1.08214	0.310949	3.48014	0.000501155	0.00187338	NA	0	NA	NA	NA	NA	NA
ENSG00000271141	7.86397	1.0817	0.307743	3.51494	0.000439858	0.00166124	NA	0	NA	NA	NA	NA	NA
ENSG00000224902	2.65199	1.08072	0.265067	4.07714	4.55929e-05	0.000202072	729442	1	729442	G antigen 12H	G antigen 12H	NM_001098410	NM_001098410,NP_001091880
ENSG00000019144	338.013	1.07993	0.096431	11.199	4.12515e-29	8.45892e-28	23187	1	23187	pleckstrin homology-like domain, family B, member 1	pleckstrin homology-like domain, family B, member 1	NM_001144758	NM_001144758,NM_001144759,NM_015157,NP_001138230,NP_001138231,NP_055972,XM_005271468,XM_005271469,XM_005271470,XM_005271471,XM_005271472,XM_005271473,XM_005271474,XM_005271475,XM_005277680,XM_006718796,XM_006718797,XM_006718798,XM_006718799,XM_006718800,XM_006718801,XM_006718802,XM_006718803,XM_006718804,XM_011542703,XM_011542704,XM_011542705,XM_011542706,XM_011542707,XM_011542708,XM_011542709,XM…
ENSG00000187566	10.2292	1.07991	0.310441	3.47862	0.000504002	0.00188313	378884	1	378884	NHL repeat containing E3 ubiquitin protein ligase 1	NHL repeat containing E3 ubiquitin protein ligase 1	NM_198586	NM_198586,NP_940988
ENSG00000250284	8.27364	1.0796	0.310588	3.47599	0.000508966	0.00190046	NA	0	NA	NA	NA	NA	NA
ENSG00000168772	263.404	1.07931	0.117457	9.18893	3.96782e-20	5.6469e-19	80319	1	80319	CXXC finger protein 4	CXXC finger protein 4	NM_025212	NM_025212,NP_079488,NR_132741,XM_011532284,XP_011530586
ENSG00000235493	7.13259	1.07907	0.309595	3.48544	0.000491337	0.00183874	NA	0	NA	NA	NA	NA	NA
ENSG00000079841	14.8566	1.07872	0.306143	3.52357	0.000425769	0.00161141	22999	1	22999	regulating synaptic membrane exocytosis 1	regulating synaptic membrane exocytosis 1	NM_001168407	NM_001168407,NM_001168408,NM_001168409,NM_001168410,NM_001168411,NM_014989,NP_001161879,NP_001161880,NP_001161881,NP_001161882,NP_001161883,NP_055804,XM_005248688,XM_011535602,XM_011535603,XM_011535604,XM_011535605,XM_011535606,XM_011535607,XM_011535608,XM_011535609,XM_011535610,XM_011535611,XM_011535612,XM_011535613,XM_011535615,XM_011535616,XM_011535617,XM_011535618,XP_005248745,XP_011533904,XP…
ENSG00000259536	7.11765	1.07797	0.311051	3.46558	0.000529093	0.00196776	NA	0	NA	NA	NA	NA	NA
ENSG00000231136	3.92714	1.07794	0.290417	3.7117	0.000205875	0.000822269	NA	0	NA	NA	NA	NA	NA
ENSG00000232502	16.9543	1.07762	0.309916	3.47712	0.000506836	0.00189281	NA	0	NA	NA	NA	NA	NA
ENSG00000205927	94.3204	1.07734	0.175318	6.14503	7.99463e-10	5.97605e-09	10215	1	10215	oligodendrocyte lineage transcription factor 2	oligodendrocyte lineage transcription factor 2	NM_005806	NM_005806,NP_005797,XM_005260908,XP_005260965
ENSG00000172382	37.1231	1.07728	0.242188	4.44813	8.66222e-06	4.27393e-05	83886	1	83886	protease, serine 27	protease, serine 27	NM_031948	NM_031948,NP_114154,XM_005255617,XM_011522689,XP_005255674,XP_011520991
ENSG00000165325	7.86315	1.07598	0.308137	3.4919	0.000479602	0.0018003	159989	1	159989	coiled-coil domain containing 67	coiled-coil domain containing 67	NM_181645	NM_181645,NP_857596,XM_005273802,XM_011542629,XM_011542630,XM_011542631,XM_011542632,XM_011542633,XM_011542634,XM_011542635,XM_011542636,XM_011542637,XM_011542638,XP_005273859,XP_011540931,XP_011540932,XP_011540933,XP_011540934,XP_011540935,XP_011540936,XP_011540937,XP_011540938,XP_011540939,XP_011540940,XR_947796,XR_947797,XR_947798,XR_947799,XR_947800
ENSG00000164900	7.42424	1.07597	0.310849	3.46138	0.000537413	0.00199648	2636	1	2636	gastrulation brain homeobox 1	gastrulation brain homeobox 1	NM_001098834	NM_001098834,NP_001092304,XM_011516025,XP_011514327
ENSG00000143850	10.9855	1.07568	0.310044	3.46943	0.000521568	0.00194348	22874	1	22874	pleckstrin homology domain containing, family A member 6	pleckstrin homology domain containing, family A member 6	NM_014935	NM_014935,NM_138480,NP_055750,XM_005244966,XM_005244967,XM_005244968,XM_006711212,XM_006711213,XM_006711214,XM_006711215,XM_006711217,XM_006711218,XM_006711219,XM_006711220,XM_006711221,XM_006711222,XM_011509295,XM_011509296,XM_011509297,XM_011509298,XM_011509299,XM_011509300,XM_011509301,XM_011509302,XM_011509303,XM_011509304,XM_011509305,XM_011509306,XP_005245023,XP_005245024,XP_005245025,XP_00…
ENSG00000162761	23.6184	1.07544	0.307104	3.50188	0.000461982	0.00173974	4009	1	4009	LIM homeobox transcription factor 1, alpha	LIM homeobox transcription factor 1, alpha	NM_001033507	NM_001033507,NM_001174069,NM_177398,NM_177399,NP_001167540,NP_796372,XM_011509538,XM_011509539,XM_011509540,XP_011507840,XP_011507841,XP_011507842
ENSG00000234028	28.7485	1.07516	0.26635	4.03664	5.42215e-05	0.0002373	NA	0	NA	NA	NA	NA	NA
ENSG00000217801	38.7591	1.07465	0.242354	4.43423	9.24004e-06	4.53893e-05	NA	0	NA	NA	NA	NA	NA
ENSG00000267272	28.3383	1.074	0.264766	4.05641	4.98319e-05	0.000219487	339524	1	339524	long intergenic non-protein coding RNA 1140	long intergenic non-protein coding RNA 1140	NM_207357	NM_207357,NR_026985,NR_026986,NR_026987,NR_026988,NR_026989
ENSG00000005379	5.49467	1.07358	0.298417	3.59758	0.000321192	0.00124523	9256	1	9256	benzodiazepine receptor (peripheral) associated protein 1	benzodiazepine receptor (peripheral) associated protein 1	NM_001261835	NM_001261835,NM_004758,NM_024418,NP_001248764,NP_004749,NP_077729,XM_005257807,XM_006722173,XM_006722174,XM_006722175,XM_006722176,XM_006722177,XM_006722178,XM_011525471,XM_011525472,XP_005257864,XP_006722236,XP_006722237,XP_006722238,XP_006722239,XP_006722240,XP_006722241,XP_011523773,XP_011523774,XR_934597,XR_934598,XR_934599
ENSG00000119919	65.9462	1.07336	0.2166	4.95552	7.21387e-07	4.05631e-06	159296	1	159296	NK2 homeobox 3	NK2 homeobox 3	NM_145285	NM_145285,NP_660328,XM_011539369,XM_011539370,XP_011537671,XP_011537672
ENSG00000130830	1113.71	1.073	0.0645005	16.6355	3.85652e-62	1.90361e-60	4354	1	4354	membrane protein, palmitoylated 1, 55kDa	membrane protein, palmitoylated 1, 55kDa	NM_001166460	NM_001166460,NM_001166461,NM_001166462,NM_002436,NP_001159932,NP_001159933,NP_001159934,NP_002427,XM_011531167,XM_011531168,XM_011531169,XP_011529469,XP_011529470,XP_011529471
ENSG00000185304	6.31163	1.07277	0.302239	3.54942	0.000386079	0.00147383	729857	1	729857	RANBP2-like and GRIP domain containing 2	RANBP2-like and GRIP domain containing 2	NM_001078170	NM_001078170,NP_001071638,XM_005264535,XM_011533085,XM_011533086,XM_011533087,XM_011533088,XM_011533089,XM_011533090,XP_005264592,XP_011531387,XP_011531388,XP_011531389,XP_011531390,XP_011531391,XP_011531392
ENSG00000250992	3.57435	1.07267	0.285362	3.759	0.000170595	0.000689961	NA	0	NA	NA	NA	NA	NA
ENSG00000006016	375.787	1.07205	0.106812	10.0368	1.05022e-23	1.76777e-22	9244	1	9244	cytokine receptor-like factor 1	cytokine receptor-like factor 1	NM_004750	NM_004750,NP_004741,XM_011528422,XM_011528423,XM_011528424,XP_011526724,XP_011526725,XP_011526726
ENSG00000235571	11.0833	1.0714	0.310621	3.44923	0.000562188	0.00208158	NA	0	NA	NA	NA	NA	NA
ENSG00000103740	116.765	1.07081	0.243866	4.39096	1.1285e-05	5.47336e-05	23205	1	23205	acyl-CoA synthetase bubblegum family member 1	acyl-CoA synthetase bubblegum family member 1	NM_001199377	NM_001199377,NM_015162,NP_001186306,NP_055977,XM_011521389,XM_011521390,XM_011521391,XP_011519691,XP_011519692,XP_011519693
ENSG00000253953	24.2595	1.0707	0.295509	3.62324	0.000290932	0.00113623	8641	1	8641	protocadherin gamma subfamily B, 4	protocadherin gamma subfamily B, 4	NM_003736	NM_003736,NM_032098,NP_003727,NP_115269
ENSG00000101680	7.34997	1.07061	0.307161	3.4855	0.000491215	0.00183858	284217	1	284217	laminin, alpha 1	laminin, alpha 1	NM_005559	NM_005559,NP_005550,XM_011525655,XM_011525656,XM_011525657,XP_011523957,XP_011523958,XP_011523959
ENSG00000140470	145.117	1.06905	0.15681	6.8175	9.26404e-12	8.07867e-11	170691	1	170691	ADAM metallopeptidase with thrombospondin type 1 motif, 17	ADAM metallopeptidase with thrombospondin type 1 motif, 17	NM_139057	NM_139057,NP_620688,XM_005254872,XM_011521312,XP_005254929,XP_011519614
ENSG00000272796	7.85998	1.06825	0.310749	3.43766	0.000586769	0.00216677	NA	0	NA	NA	NA	NA	NA
ENSG00000142606	5.96684	1.06696	0.306105	3.48559	0.000491054	0.00183827	79258	1	79258	membrane metallo-endopeptidase-like 1	membrane metallo-endopeptidase-like 1	NM_033467	NM_033467,NP_258428,XM_011542115,XM_011542116,XM_011542117,XM_011542118,XM_011542119,XM_011542120,XM_011542121,XM_011542122,XM_011542123,XM_011542124,XM_011542125,XM_011546399,XM_011546400,XM_011546401,XM_011546402,XM_011546403,XM_011546404,XM_011546405,XM_011546406,XM_011546407,XM_011546408,XM_011546409,XM_011546410,XP_011540417,XP_011540418,XP_011540419,XP_011540420,XP_011540421,XP_011540422,XP…
ENSG00000206082	18.2356	1.06544	0.296086	3.59841	0.000320164	0.00124144	NA	0	NA	NA	NA	NA	NA
ENSG00000271614	13.4843	1.0653	0.304353	3.50022	0.000464878	0.00174956	338758	1	338758	long intergenic non-protein coding RNA 936	long intergenic non-protein coding RNA 936	NR_028138	NR_028138
[truncated: 33,602 more rows]

## Sheet: up
ensembl	baseMean	log2FoldChange	lfcSE	stat	pvalue	padj	entrez.first	entrez.count	concatenated	GENENAME.first	GENENAME.concat	REFSEQ.first	REFSEQ.concat	pvalue	padj	entrez.first	entrez.count	concatenated	GENENAME.first	GENENAME.concat	REFSEQ.first	REFSEQ.concat	114824	paraneoplastic Ma antigen family member 5	paraneoplastic Ma antigen family member 5	NM_001103150	NM_001103150,NM_001103151,NM_001184924,NM_052926,NP_001096620,NP_001096621,NP_001171853,NP_443158
[truncated: 1,850 more rows]

[truncated: 1 more sheets: down]
