# Supplementary material for: The domesticated transposon protein L1TD1 associates with its ancestor L1 ORF1p to promote LINE-1 retrotransposition
Source: eLife. 2025 Mar 20;13:RP96850. doi: 10.7554/eLife.96850 (PMC11925450; doi:10.7554/eLife.96850)
Supplement: Supplementary file 2. [file elife-96850-supp2.xlsx]

## Sheet: info
Column Name	Description
Gene ID	Ensembl gene id
Gene name	Gene name
basemean	average of normalize count values, dividing by size factors taken over all samples
logFC	Fold change (log2) over DNMT1 KO cells
lfcSE	Standard error estimate for the log2 fold change estimate
P value	p value
adj pvalue	adjusted p value
logfc shrunken	shrinkage estimation for dispersions and fold changes to improve stability and interpretability of estimates
Data analysis was explained in Materials and Methods section
GEO GSE254459

## Sheet: IP vs input in KO HAP1
gene_id	gene_name	baseMean	log2FoldChange	lfcSE	stat	pvalue	padj	log2FoldChange.shrunk	sign
ENSG00000240563	L1TD1	3099.9	5.14018	0.451895	11.3747	5.58813e-30	9.23252e-28	4.85409	up
ENSG00000100852	ARHGAP5	695.882	5.27381	0.554303	9.51432	1.82912e-21	1.22929e-19	4.82603	up
ENSG00000236824	BCYRN1	11248.5	6.25619	1.09143	5.73208	9.92066e-09	1.34994e-07	4.75917	up
ENSG00000280128		157.551	5.49708	0.743448	7.39404	1.42435e-13	3.77529e-12	4.72296	up
ENSG00000280079		169.714	4.91227	0.536221	9.16091	5.14637e-20	2.92355e-18	4.54308	up
ENSG00000275764		111.513	5.02004	0.679466	7.38822	1.48806e-13	3.91796e-12	4.45347	up
ENSG00000200913	SNORD46	59.2472	4.63226	0.555105	8.34485	7.1305e-17	2.82174e-15	4.29032	up
ENSG00000290018		441.93	5.71388	1.10992	5.14801	2.63269e-07	2.80622e-06	4.28345	up
ENSG00000289871		11.7169	6.38672	1.67905	3.80377	0.000142511	0.000884325	4.26646	up
ENSG00000277998		297.592	4.28374	0.338669	12.6487	1.13686e-36	3.75656e-34	4.14703	up
ENSG00000131016	AKAP12	5015.22	4.21989	0.298713	14.1269	2.59202e-45	1.77205e-42	4.10357	up
ENSG00000199480	RNA5SP389	68.1003	4.48687	0.613022	7.31927	2.49328e-13	6.41972e-12	4.00679	up
ENSG00000144674	GOLGA4	1885.35	4.1744	0.406663	10.265	1.01308e-24	9.75016e-23	3.97015	up
ENSG00000107890	ANKRD26	942.042	4.04018	0.331143	12.2007	3.08173e-34	7.45102e-32	3.90729	up
ENSG00000104442	ARMC1	3182.87	4.03448	0.324903	12.4175	2.10013e-35	5.57252e-33	3.90711	up
ENSG00000277806		21.8414	5.70811	1.40267	4.06945	4.71241e-05	0.000328048	3.90131	up
ENSG00000133739	LRRCC1	1005.96	3.95394	0.283897	13.9274	4.31893e-44	2.76217e-41	3.85835	up
ENSG00000196119	OR8A1	23.1294	4.97815	1.17056	4.2528	2.11117e-05	0.000157591	3.84325	up
ENSG00000160321	ZNF208	275.962	3.98178	0.392184	10.1528	3.21851e-24	2.84867e-22	3.79767	up
ENSG00000198162	MAN1A2	838.732	3.85092	0.307761	12.5127	6.36325e-36	1.94089e-33	3.74046	up
ENSG00000023287	RB1CC1	1769.4	3.84208	0.315724	12.1691	4.53944e-34	1.05881e-31	3.72608	up
ENSG00000182670	TTC3	2378.98	3.7913	0.269482	14.0688	5.90219e-45	3.90056e-42	3.7072	up
ENSG00000288945		8.59061	6.81913	1.89285	3.60257	0.000315083	0.00180544	3.69895	up
ENSG00000133863	TEX15	385.536	3.80162	0.30518	12.457	1.28108e-35	3.6284e-33	3.69826	up
ENSG00000232931	LINC00342	91.9458	4.51655	0.899503	5.02116	5.13595e-07	5.16617e-06	3.68272	up
ENSG00000101745	ANKRD12	627.82	3.7676	0.294158	12.8081	1.47748e-37	5.52691e-35	3.66684	up
ENSG00000106536	POU6F2	239.563	3.78444	0.345454	10.955	6.28866e-28	8.23952e-26	3.65063	up
ENSG00000275110		27.6699	6.38394	1.42586	4.47726	7.56073e-06	6.251e-05	3.5739	up
ENSG00000151914	DST	616.804	3.64645	0.284953	12.7966	1.71181e-37	6.28489e-35	3.55723	up
ENSG00000146757	ZNF92	783.275	3.60773	0.251913	14.3213	1.60987e-46	1.18212e-43	3.53749	up
ENSG00000203668	CHML	572.717	3.58205	0.253049	14.1556	1.72539e-45	1.2217e-42	3.51392	up
ENSG00000171988	JMJD1C	360.191	3.70597	0.439077	8.44037	3.1634e-17	1.3176e-15	3.4944	up
ENSG00000215105	TTC3P1	29.945	4.07466	0.724465	5.62437	1.86188e-08	2.42216e-07	3.48681	up
ENSG00000139618	BRCA2	621.278	3.63086	0.36885	9.84374	7.29488e-23	5.45767e-21	3.48143	up
ENSG00000274652		12.2146	7.27382	1.93321	3.76257	0.000168177	0.0010253	3.48129	up
ENSG00000197555	SIPA1L1	665.892	3.69394	0.452594	8.16171	3.3032e-16	1.2241e-14	3.46689	up
ENSG00000274422		25.8791	5.70685	1.41372	4.03675	5.41973e-05	0.000371419	3.45666	up
ENSG00000171634	BPTF	1245.09	3.53306	0.281515	12.5502	3.96744e-36	1.24855e-33	3.44624	up
ENSG00000141404	GNAL	327.305	3.97787	0.715669	5.55826	2.72478e-08	3.44086e-07	3.43557	up
ENSG00000227437	RPS8P4	189.123	3.77557	0.597156	6.32259	2.57209e-10	4.46144e-09	3.42794	up
ENSG00000009413	REV3L	379.84	3.61366	0.423021	8.5425	1.31343e-17	5.76108e-16	3.42471	up
ENSG00000060982	BCAT1	8794.36	3.46768	0.229441	15.1136	1.31721e-51	1.63218e-48	3.41122	up
ENSG00000156299	TIAM1	353.373	5.04282	1.29348	3.89864			3.39457	-
ENSG00000158290	CUL4B	688.677	3.52975	0.370508	9.5268	1.62203e-21	1.09382e-19	3.38713	up
ENSG00000038219	BOD1L1	603.107	3.48078	0.31448	11.0684	1.78613e-28	2.54761e-26	3.37665	up
ENSG00000138778	CENPE	2005.55	3.46692	0.298307	11.622	3.18671e-31	5.84997e-29	3.37245	up
ENSG00000068489	PRR11	8414	3.42546	0.260146	13.1675	1.3504e-39	6.22629e-37	3.35431	up
ENSG00000035928	RFC1	2024.7	3.42705	0.270557	12.6666	9.04989e-37	3.04107e-34	3.34964	up
ENSG00000257159		5.72908	6.30179	2.05952	3.05984	0.00221455	0.0100425	3.34474	up
ENSG00000206418	RAB12	92.7072	3.63471	0.541271	6.71514	1.87887e-11	3.80885e-10	3.33133	up
ENSG00000133710	SPINK5	92.4356	3.8591	0.696765	5.5386	3.04897e-08	3.82588e-07	3.32895	up
ENSG00000168916	ZNF608	91.551	3.54666	0.459057	7.72596	1.11012e-14	3.43359e-13	3.32887	up
ENSG00000101773	RBBP8	1220.58	3.38262	0.264937	12.7676	2.48557e-37	8.9598e-35	3.30901	up
ENSG00000151846	PABPC3	4.72766	5.90546	1.77538	3.32632	0.000880023	0.00449558	3.30619	up
ENSG00000075407	ZNF37A	765.617	3.4682	0.404138	8.58171	9.34707e-18	4.20216e-16	3.30189	up
ENSG00000089682	RBM41	531.832	3.42714	0.366802	9.34331	9.33722e-21	5.83974e-19	3.29271	up
ENSG00000145734	BDP1	1166.76	3.38069	0.30642	11.0328	2.65351e-28	3.73109e-26	3.28422	up
ENSG00000173114	LRRN3	16.3496	3.72839	0.910684	4.09405	4.23899e-05	0.000297811	3.28273	up
ENSG00000107341	UBE2R2	2091.72	3.31921	0.226648	14.6448	1.45531e-48	1.44265e-45	3.26657	up
ENSG00000233668		490.393	3.4325	0.420451	8.16386	3.24485e-16	1.20473e-14	3.25901	up
ENSG00000201822	RNA5SP149	11.5589	4.72472	1.29882	3.63771	0.000275078	0.00159979	3.2516	up
ENSG00000066279	ASPM	928.532	3.33854	0.303208	11.0107	3.39233e-28	4.69845e-26	3.24598	up
ENSG00000101966	XIAP	663.825	3.34149	0.315937	10.5764	3.83225e-26	4.10693e-24	3.24201	up
ENSG00000289250		6.45102	5.95415	1.61671	3.68288	0.000230618	0.00136281	3.2206	up
ENSG00000118412	CASP8AP2	584.51	3.35952	0.376357	8.92642	4.40026e-19	2.28376e-17	3.21903	up
ENSG00000169083	AR	213.685	3.32469	0.340854	9.75402	1.77311e-22	1.29242e-20	3.20672	up
ENSG00000235651	G3BP1P1	9.34203	4.05872	1.22248	3.32007	0.000899957	0.00458441	3.19876	up
ENSG00000126777	KTN1	2704.19	3.28923	0.302946	10.8575	1.8377e-27	2.32065e-25	3.19662	up
ENSG00000258636	LRFN5-DT	42.3768	3.94435	0.929948	4.24147	2.22058e-05	0.000164765	3.19318	up
ENSG00000273284		15.9683	4.62197	1.30879	3.53149	0.000413219	0.00229997	3.18739	up
ENSG00000229089	ANKRD20A8P	95.2011	3.33288	0.394407	8.45034	2.90456e-17	1.22004e-15	3.18671	up
ENSG00000281087		30.1215	4.89705	1.57576	3.10773			3.16624	-
ENSG00000237268		58.0871	3.66456	0.709718	5.16341	2.42496e-07	2.60582e-06	3.16491	up
ENSG00000164151	ICE1	396.04	3.3017	0.383246	8.61509	6.98847e-18	3.17783e-16	3.15621	up
ENSG00000078177	N4BP2	415.125	3.2276	0.280172	11.5201	1.04516e-30	1.85012e-28	3.15003	up
ENSG00000286707		23.2068	3.51694	0.80373	4.37577	1.21003e-05	9.58838e-05	3.14661	up
ENSG00000110318	CEP126	179.935	3.43024	0.541126	6.33907	2.31163e-10	4.03081e-09	3.14528	up
ENSG00000185561	TLCD2	188.316	3.35182	0.502786	6.66649	2.61994e-11	5.1736e-10	3.11174	up
ENSG00000215146		280.971	3.31912	0.477548	6.95034	3.64417e-12	8.1088e-11	3.10603	up
ENSG00000240673		14.9748	3.89509	1.02809	3.78867	0.000151458	0.000935744	3.10311	up
ENSG00000188322	SBK1	394.225	3.18177	0.290358	10.9581	6.07543e-28	8.084e-26	3.10002	up
ENSG00000138592	USP8	827.421	3.27689	0.43215	7.58278	3.38229e-14	9.74671e-13	3.08991	up
ENSG00000204789	ZNF204P	248.954	3.30096	0.52571	6.27904	3.40664e-10	5.84257e-09	3.04641	up
ENSG00000100592	DAAM1	1293.5	3.17153	0.366989	8.64203	5.5223e-18	2.54026e-16	3.04322	up
ENSG00000008311	AASS	724.546	3.16448	0.376079	8.41441	3.94888e-17	1.61424e-15	3.03149	up
ENSG00000167232	ZNF91	677.129	3.1849	0.411819	7.73373	1.0444e-14	3.23537e-13	3.02631	up
ENSG00000148773	MKI67	663.888	3.11622	0.324367	9.60708	7.46331e-22	5.15566e-20	3.01378	up
ENSG00000289094		23.8552	3.98961	1.16163	3.43449	0.000593672	0.00316062	3.00821	up
ENSG00000109790	KLHL5	891.744	3.05965	0.252793	12.1034	1.01338e-33	2.25745e-31	3.00118	up
ENSG00000152926	ZNF117	21.5722	3.62452	0.905496	4.0028	6.25964e-05	0.000422552	2.99884	up
ENSG00000085224	ATRX	748.177	3.07275	0.294712	10.4263	1.88087e-25	1.90256e-23	2.99011	up
ENSG00000254162		9.16128	5.01344	1.81203	2.76676	0.00566162	0.022499	2.98244	up
ENSG00000226833	PPP1CB-DT	428.557	5.55108	1.87098	2.96693			2.97981	-
ENSG00000123104	ITPR2	198.511	3.0779	0.324233	9.49288	2.24729e-21	1.50016e-19	2.97022	up
ENSG00000142937	RPS8	750780	3.05084	0.303531	10.0512	9.07987e-24	7.43874e-22	2.96582	up
ENSG00000247746	USP51	41.3998	3.75334	0.959687	3.911	9.19147e-05	0.000599638	2.95786	up
ENSG00000174501	ANKRD36C	153.538	3.13857	0.444643	7.05863	1.6815e-12	3.93799e-11	2.95728	up
ENSG00000145012	LPP	268.244	3.11309	0.421752	7.38133	1.56718e-13	4.1099e-12	2.95158	up
ENSG00000064012	CASP8	72.1291	3.45889	0.73111	4.73101	2.23402e-06	2.02894e-05	2.95066	up
ENSG00000135315	CEP162	273.258	3.11929	0.437098	7.13637	9.58274e-13	2.30847e-11	2.94969	up
ENSG00000242615		84.1452	3.05779	0.404308	7.56302	3.93806e-14	1.13154e-12	2.94504	up
ENSG00000137831	UACA	1548.05	3.00429	0.270456	11.1082	1.14403e-28	1.64359e-26	2.93646	up
ENSG00000260317	LINC02986	11.444	3.65197	1.11236	3.28309	0.00102676	0.00515108	2.92554	up
ENSG00000101935	AMMECR1	225.839	3.04665	0.372051	8.18878	2.63888e-16	9.94648e-15	2.92315	up
ENSG00000213463	SYNJ2BP	460.965	3.08448	0.453344	6.80384	1.01867e-11	2.13266e-10	2.90509	up
ENSG00000165813	CCDC186	173.421	3.06726	0.420896	7.28744	3.15902e-13	8.01929e-12	2.905	up
ENSG00000078674	PCM1	1229.29	2.9344	0.188377	15.5772	1.03983e-54	1.47255e-51	2.90176	up
ENSG00000188994	ZNF292	502.144	3.01618	0.356968	8.44946	2.92656e-17	1.22668e-15	2.899	up
ENSG00000091656	ZFHX4	281.733	3.05134	0.409043	7.4597	8.67214e-14	2.3715e-12	2.89895	up
ENSG00000101882	NKAP	540.753	2.96457	0.278263	10.6539	1.67289e-26	1.88448e-24	2.89379	up
ENSG00000150776	NKAPD1	1000.54	2.94589	0.243299	12.1081	9.56439e-34	2.15481e-31	2.89239	up
ENSG00000116005	PCYOX1	1751.9	2.97645	0.319508	9.31574	1.2111e-20	7.48014e-19	2.88452	up
ENSG00000165288	BRWD3	193.276	2.99105	0.354592	8.43519	3.30673e-17	1.37153e-15	2.87878	up
ENSG00000060339	CCAR1	2634.48	2.90568	0.179934	16.1486	1.16173e-58	2.55916e-55	2.87636	up
ENSG00000240376		2027.42	2.95135	0.304135	9.70408	2.89673e-22	2.07331e-20	2.86957	up
ENSG00000186439	TRDN	30.5856	3.51887	0.902624	3.89849	9.67933e-05	0.00062857	2.86952	up
ENSG00000198420	TCAF1	270.283	2.95887	0.328288	9.01303	2.00448e-19	1.0683e-17	2.8657	up
ENSG00000168803	ADAL	723.098	2.93013	0.272955	10.7349	6.98164e-27	8.23916e-25	2.86388	up
ENSG00000152104	PTPN14	646.553	3.03104	0.436027	6.95148	3.61464e-12	8.05212e-11	2.86304	up
ENSG00000164323	CFAP97	597.345	2.95399	0.326263	9.05403	1.37787e-19	7.46385e-18	2.85886	up
ENSG00000219391		6.94153	3.9387	1.34094	2.93726	0.00331132	0.0142008	2.85418	up
ENSG00000180233	ZNRF2	31.9926	3.44389	0.803831	4.28435	1.83273e-05	0.000138907	2.8386	up
ENSG00000134982	APC	262.442	2.92694	0.326125	8.9749	2.83601e-19	1.49938e-17	2.83509	up
ENSG00000081386	ZNF510	27.9324	3.38753	0.868521	3.90034	9.60565e-05	0.000624194	2.82416	up
ENSG00000267383		244.831	3.15293	0.626265	5.0345	4.79108e-07	4.85872e-06	2.82074	up
ENSG00000122483	CCDC18	584.085	2.87125	0.249845	11.4922	1.44466e-30	2.51244e-28	2.81687	up
ENSG00000138182	KIF20B	1766.49	2.85639	0.24413	11.7003	1.27059e-31	2.42217e-29	2.80403	up
ENSG00000105810	CDK6	790.716	2.86083	0.264096	10.8326	2.41337e-27	2.91753e-25	2.80051	up
ENSG00000204186	ZDBF2	272.252	3.09435	0.586525	5.27573	1.32232e-07	1.48199e-06	2.79918	up
ENSG00000115355	CCDC88A	1135.67	2.88353	0.311526	9.25614	2.11956e-20	1.27727e-18	2.79843	up
ENSG00000033867	SLC4A7	341.413	2.84853	0.23423	12.1612	5.00062e-34	1.15282e-31	2.7973	up
ENSG00000248360	LINC00504	76.324	3.49397	0.998009	3.50094	0.00046362	0.00254483	2.793	up
ENSG00000148019	CEP78	717.023	2.84055	0.236158	12.0282	2.52607e-33	5.50351e-31	2.79222	up
ENSG00000164114	MAP9	419.032	2.85542	0.285816	9.99039	1.67926e-23	1.33707e-21	2.78596	up
ENSG00000138336	TET1	945.322	2.91063	0.380107	7.65738	1.89757e-14	5.6744e-13	2.78482	up
ENSG00000156052	GNAQ	446.675	2.87057	0.324325	8.8509	8.68164e-19	4.39087e-17	2.78059	up
ENSG00000215271	HOMEZ	757.091	2.90417	0.378773	7.66731	1.75647e-14	5.26836e-13	2.77524	up
ENSG00000104218	CSPP1	438.755	2.86972	0.330835	8.67416	4.16596e-18	1.94798e-16	2.77422	up
ENSG00000180530	NRIP1	148.331	3.0475	0.556722	5.474	4.39984e-08	5.38464e-07	2.76939	up
ENSG00000241316	SUCLG2-DT	42.7885	3.04637	0.656812	4.63812	3.51595e-06	3.0926e-05	2.769	up
ENSG00000081026	MAGI3	180.573	3.20026	0.717252	4.46184	8.12601e-06	6.66003e-05	2.76855	up
ENSG00000106034	CPED1	189.76	3.05803	0.634288	4.82121	1.42691e-06	1.33821e-05	2.76383	up
ENSG00000188738	FSIP2	16.4597	3.18174	0.746535	4.26201	2.02594e-05	0.000151857	2.76106	up
ENSG00000233330		7.22879	5.45617	1.91971	2.84218	0.00448062	0.0184415	2.75384	up
ENSG00000196458	ZNF605	57.0593	3.026	0.592306	5.10885	3.24132e-07	3.40734e-06	2.75361	up
ENSG00000065526	SPEN	332.944	2.82745	0.292817	9.65602	4.63539e-22	3.28219e-20	2.75292	up
ENSG00000060749	QSER1	392.635	2.94613	0.47742	6.17093	6.78915e-10	1.10329e-08	2.75018	up
ENSG00000163104	SMARCAD1	310.613	2.85609	0.35674	8.00607	1.1843e-15	4.09773e-14	2.74683	up
ENSG00000174718	RESF1	498.004	2.88525	0.405602	7.1135	1.13133e-12	2.71547e-11	2.74241	up
ENSG00000168772	CXXC4	244.173	2.82186	0.310524	9.08743	1.01407e-19	5.60025e-18	2.74205	up
ENSG00000143776	CDC42BPA	542.788	2.86022	0.373866	7.65038	2.00381e-14	5.98306e-13	2.74089	up
ENSG00000141446	ESCO1	361	2.88243	0.410057	7.02934	2.07517e-12	4.77844e-11	2.7394	up
ENSG00000129116	PALLD	1537.03	2.79879	0.266917	10.4856	1.00586e-25	1.03865e-23	2.73764	up
ENSG00000171943	SRGAP2C	104.698	2.87656	0.413415	6.95803	3.45064e-12	7.70411e-11	2.73678	up
ENSG00000206530	CFAP44	30.3081	3.11934	0.711891	4.38176	1.17722e-05	9.35453e-05	2.72701	up
ENSG00000048991	R3HDM1	505.427	2.79012	0.27728	10.0625	8.09494e-24	6.74329e-22	2.72546	up
ENSG00000199994	RNA5SP145	61.2693	8.31624	2.03785	4.08089	4.48633e-05	0.000313964	2.72322	up
ENSG00000137812	KNL1	318.49	2.91709	0.478327	6.09853	1.07045e-09	1.67902e-08	2.72221	up
ENSG00000055609	KMT2C	404.804	2.82079	0.34062	8.28135	1.21788e-16	4.74374e-15	2.71922	up
ENSG00000247199	FBXO38-DT	47.1933	3.13279	0.741753	4.22349	2.40545e-05	0.000177354	2.71183	up
ENSG00000119547	ONECUT2	209.158	2.89502	0.475598	6.08711	1.14964e-09	1.79048e-08	2.7093	up
ENSG00000153201	RANBP2	579.744	2.77906	0.286135	9.71243	2.66886e-22	1.91713e-20	2.7092	up
ENSG00000079482	OPHN1	54.7419	3.23818	0.741356	4.36791	1.25443e-05	9.90061e-05	2.70845	up
ENSG00000067208	EVI5	325.316	2.7968	0.327459	8.54092	1.33156e-17	5.8277e-16	2.70471	up
ENSG00000047346	FAM214A	59.5839	2.97507	0.572352	5.19797	2.01476e-07	2.19596e-06	2.70183	up
ENSG00000272293		22.0465	3.04834	0.763095	3.9947	6.47755e-05	0.000435483	2.69938	up
ENSG00000272518		11.9808	4.04646	1.42185	2.84591	0.00442851	0.0182611	2.69928	up
ENSG00000247679		176.937	3.89384	1.23883	3.14316	0.00167134	0.00789893	2.6973	up
ENSG00000251689		12.0864	4.50005	1.48835	3.02351	0.00249859	0.0111219	2.69221	up
ENSG00000189423	USP32P3	3.99579	5.75551	2.309	2.49264	0.0126797	0.0445012	2.69115	up
ENSG00000197372	ZNF675	156.274	2.76553	0.324139	8.53193	1.43927e-17	6.23034e-16	2.67986	up
ENSG00000058272	PPP1R12A	765.97	2.75468	0.299232	9.20582	3.39077e-20	1.97722e-18	2.67855	up
ENSG00000135837	CEP350	520.235	2.7774	0.368514	7.53675	4.81837e-14	1.35888e-12	2.66505	up
ENSG00000107854	TNKS2	567.551	2.72141	0.270595	10.0571	8.54475e-24	7.05867e-22	2.65959	up
ENSG00000102678	FGF9	61.042	3.05728	0.704056	4.34239	1.40944e-05	0.000109787	2.65946	up
ENSG00000143469	SYT14	107.198	2.87715	0.523772	5.49314	3.9484e-08	4.86822e-07	2.65722	up
ENSG00000174373	RALGAPA1	65.5105	2.82376	0.463055	6.09812	1.07324e-09	1.68206e-08	2.65561	up
ENSG00000280088		67.3263	3.00309	0.643755	4.66495	3.08686e-06	2.74563e-05	2.64826	up
ENSG00000146587	RBAK	151.665	2.91595	0.577365	5.05045	4.40777e-07	4.52321e-06	2.64754	up
ENSG00000163785	RYK	421.425	2.74646	0.349173	7.8656	3.67323e-15	1.19779e-13	2.64597	up
ENSG00000253377		82.2705	5.76682	1.99717	2.8875	0.00388319	0.0163318	2.64486	up
ENSG00000227470	RPL39P16	8.84941	3.45865	1.21858	2.83825	0.0045361	0.0186182	2.64112	up
ENSG00000166450	PRTG	133.957	2.84013	0.491321	5.78061	7.44282e-09	1.0319e-07	2.63992	up
ENSG00000162623	TYW3	517.409	2.70742	0.299105	9.05172	1.4073e-19	7.60247e-18	2.63456	up
ENSG00000163029	SMC6	594.634	2.68078	0.234756	11.4194	3.3438e-30	5.61816e-28	2.63445	up
ENSG00000148143	ZNF462	311.398	2.71457	0.313707	8.65322	5.00685e-18	2.33018e-16	2.63319	up
ENSG00000286152		4.43904	4.85444	1.99335	2.43531	0.0148789	0.0508778	2.6288	-
ENSG00000197969	VPS13A	255.39	2.69628	0.287934	9.36422	7.66119e-21	4.82193e-19	2.62859	up
ENSG00000236058	RPL17P36	582.016	3.57511	1.16705	3.06337			2.62804	-
ENSG00000196247	ZNF107	257.918	2.78956	0.445193	6.26595	3.70562e-10	6.32252e-09	2.62785	up
ENSG00000238247	RDXP3	5.83527	4.11839	1.53253	2.68731	0.00720296	0.0276664	2.62701	up
ENSG00000146247	PHIP	1297.07	2.67391	0.264506	10.1091	5.03629e-24	4.36024e-22	2.61566	up
ENSG00000118200	CAMSAP2	271.218	2.76104	0.427242	6.46247	1.03007e-10	1.88223e-09	2.61497	up
ENSG00000198464	ZNF480	464.389	2.70747	0.351439	7.70396	1.31909e-14	4.03586e-13	2.60816	up
ENSG00000196482	ESRRG	10.2734	5.05907	1.86863	2.70738	0.00678175	0.0262813	2.59863	up
ENSG00000123636	BAZ2B	373.742	2.69602	0.35522	7.5897	3.20645e-14	9.30764e-13	2.59167	up
ENSG00000260196		156.28	2.8655	0.577109	4.96527	6.86061e-07	6.72028e-06	2.59162	up
ENSG00000182141	ZNF708	123.553	2.96878	0.698726	4.24885	2.14875e-05	0.000160095	2.58873	up
ENSG00000197603	CPLANE1	54.2806	2.99854	0.713708	4.20135	2.65324e-05	0.00019375	2.58792	up
ENSG00000187231	SESTD1	308.791	2.73795	0.429113	6.38048	1.7653e-10	3.12211e-09	2.58723	up
ENSG00000197312	DDI2	510.124	2.69534	0.373482	7.21679	5.32293e-13	1.31423e-11	2.58328	up
ENSG00000196074	SYCP2	26.4127	2.90767	0.755727	3.84752	0.000119319	0.000755066	2.58322	up
ENSG00000215457	RPS8P3	25.2071	2.93723	0.761072	3.85934	0.000113695	0.000724099	2.5809	up
ENSG00000171827	ZNF570	131.446	2.83104	0.56306	5.02796	4.95733e-07	4.99918e-06	2.58067	up
ENSG00000212459	RNU6-695P	3.29025	5.35295	2.10574	2.54208	0.0110196	0.0396217	2.57834	up
ENSG00000230383	RPL6P19	6728.54	3.36626	1.04119	3.23309	0.00122457	0.0060095	2.57791	up
ENSG00000104408	EIF3E	59261.7	2.61212	0.208212	12.5455	4.20778e-36	1.30349e-33	2.57708	up
ENSG00000176208	ATAD5	359.577	2.77005	0.491955	5.6307	1.79485e-08	2.34727e-07	2.57537	up
ENSG00000101974	ATP11C	620.252	2.64259	0.289708	9.12156	7.4054e-20	4.14744e-18	2.57295	up
ENSG00000139116	KIF21A	511.325	2.618	0.245215	10.6764	1.31322e-26	1.48777e-24	2.56985	up
ENSG00000174197	MGA	377.52	2.648	0.315478	8.39361	4.71425e-17	1.90744e-15	2.56681	up
ENSG00000112419	PHACTR2	264.155	2.74124	0.473855	5.78498	7.25203e-09	1.00685e-07	2.56558	up
ENSG00000169967	MAP3K2	321.248	2.67412	0.372096	7.18665	6.64021e-13	1.6273e-11	2.56418	up
ENSG00000170017	ALCAM	531.096	2.64497	0.320644	8.24894	1.59799e-16	6.1518e-15	2.56214	up
ENSG00000229676	ZNF492	72.3417	2.90306	0.668956	4.33969	1.42687e-05	0.000110894	2.56214	up
ENSG00000138688	KIAA1109	196.183	2.72458	0.450016	6.05441	1.40929e-09	2.16594e-08	2.55999	up
ENSG00000153250	RBMS1	803.97	2.60705	0.243545	10.7046	9.68381e-27	1.12936e-24	2.5597	up
ENSG00000160551	TAOK1	479.437	2.6036	0.236517	11.0081	3.49339e-28	4.74383e-26	2.55868	up
ENSG00000039560	RAI14	774.061	2.67469	0.381625	7.00869	2.40565e-12	5.48842e-11	2.55764	up
ENSG00000171316	CHD7	767.509	2.6147	0.265532	9.847	7.06198e-23	5.30344e-21	2.55725	up
ENSG00000219626	FAM228B	77.6729	2.92682	0.720209	4.06384	4.82709e-05	0.000335443	2.55447	up
ENSG00000162643	DNAI3	5.75074	4.3657	2.00808	2.17406	0.0297003	0.0895298	2.55419	-
ENSG00000198707	CEP290	481.212	2.61739	0.283079	9.24617	2.32683e-20	1.38533e-18	2.5541	up
ENSG00000065613	SLK	648.711	2.62447	0.298535	8.79117	1.48006e-18	7.37277e-17	2.55383	up
ENSG00000162614	NEXN	106.562	2.70456	0.436189	6.20044	5.63062e-10	9.31825e-09	2.55328	up
ENSG00000269973		74.362	2.98027	0.727741	4.09524	4.21736e-05	0.000296606	2.55253	up
ENSG00000118482	PHF3	1055.56	2.64982	0.356837	7.42587	1.12037e-13	3.00169e-12	2.54806	up
ENSG00000188227	ZNF793	150.146	2.77877	0.550845	5.04456	4.54555e-07	4.64536e-06	2.54747	up
ENSG00000162688	AGL	313.585	2.61002	0.287187	9.08824	1.00656e-19	5.57431e-18	2.54238	up
ENSG00000067900	ROCK1	1091.81	2.5904	0.244549	10.5926	3.22628e-26	3.47632e-24	2.54228	up
ENSG00000122484	RPAP2	492.768	2.70177	0.450442	5.99805	1.99703e-09	3.01088e-08	2.54223	up
ENSG00000255642	PABPC1P4	54.4666	2.73264	0.542198	5.03993	4.65713e-07	4.73985e-06	2.5412	up
ENSG00000196705	ZNF431	193.822	2.72141	0.483053	5.63376	1.76325e-08	2.30747e-07	2.54017	up
ENSG00000133302	SLF1	260.619	2.59763	0.271433	9.57009	1.06815e-21	7.27734e-20	2.53967	up
ENSG00000100697	DICER1	454.51	2.57943	0.230957	11.1685	5.81862e-29	8.73939e-27	2.53802	up
ENSG00000237186		10.9423	3.7552	1.39342	2.69494	0.00704014	0.0271288	2.53769	up
ENSG00000108510	MED13	314.617	2.60351	0.285718	9.11214	8.07706e-20	4.51087e-18	2.53724	up
ENSG00000189180	ZNF33A	644.192	2.63558	0.356621	7.39042	1.46363e-13	3.85877e-12	2.53564	up
ENSG00000120694	HSPH1	1205.47	2.59767	0.282144	9.2069	3.35682e-20	1.9632e-18	2.53479	up
ENSG00000116539	ASH1L	290.779	2.6099	0.313668	8.32058	8.75367e-17	3.43664e-15	2.53263	up
ENSG00000114251	WNT5A	82.1067	2.79925	0.57071	4.90486	9.34957e-07	8.98519e-06	2.53253	up
ENSG00000118985	ELL2	155.787	2.78921	0.584528	4.77173	1.8265e-06	1.68429e-05	2.53234	up
ENSG00000185942	NKAIN3	271.759	2.82265	0.626958	4.50213	6.72752e-06	5.61599e-05	2.52947	up
ENSG00000156103	MMP16	142.145	2.74811	0.527468	5.21001	1.88833e-07	2.0684e-06	2.52622	up
ENSG00000215421	ZNF407	46.3722	3.11417	0.842786	3.69509	0.000219813	0.00130284	2.52273	up
ENSG00000036530	CYP46A1	6.57918	3.52439	1.32675	2.65642	0.00789761	0.0299442	2.52197	up
ENSG00000183354	KIAA2026	200.556	2.84393	0.640282	4.44169	8.92568e-06	7.25843e-05	2.52168	up
ENSG00000054654	SYNE2	253.68	2.60183	0.318495	8.16913	3.10618e-16	1.15758e-14	2.52098	up
ENSG00000138768	USO1	1437.73	2.59188	0.301426	8.59872	8.06129e-18	3.65728e-16	2.52036	up
ENSG00000163808	KIF15	312.185	2.59032	0.29591	8.75376	2.06351e-18	1.01015e-16	2.52024	up
ENSG00000153207	AHCTF1	304.704	2.55323	0.224716	11.362	6.46346e-30	1.05037e-27	2.51465	up
ENSG00000107863	ARHGAP21	171.028	2.59317	0.315498	8.21929	2.04716e-16	7.82023e-15	2.51349	up
ENSG00000164190	NIPBL	1023	2.6105	0.348389	7.49307	6.72798e-14	1.86297e-12	2.51315	up
ENSG00000165525	NEMF	871.618	2.55501	0.232016	11.0122	3.33698e-28	4.65908e-26	2.51242	up
ENSG00000135776	ABCB10	343.006	2.57264	0.278128	9.24981	2.24888e-20	1.34702e-18	2.51227	up
ENSG00000278530	CHMP1B2P	22.4764	2.98994	0.900799	3.31921	0.000902739	0.00459387	2.51147	up
ENSG00000123066	MED13L	561.234	2.5689	0.270494	9.49705	2.15914e-21	1.44619e-19	2.51044	up
ENSG00000158636	EMSY	443.647	2.61381	0.363344	7.19376	6.30328e-13	1.54664e-11	2.50779	up
ENSG00000111860	CEP85L	122.417	2.77624	0.591556	4.69311	2.69079e-06	2.4161e-05	2.5074	up
ENSG00000272842		15.5717	4.99814	1.69469	2.94929	0.00318502	0.0137275	2.5072	up
ENSG00000182050	MGAT4C	30.4889	2.84046	0.785549	3.61589	0.00029932	0.0017276	2.50473	up
ENSG00000147174	GCNA	10.1633	6.34485	1.94727	3.25834	0.00112067	0.00556216	2.50427	up
ENSG00000182621	PLCB1	304.202	2.59324	0.339671	7.63458	2.26559e-14	6.71413e-13	2.50382	up
ENSG00000277112	ANKRD20A21P	5.0037	3.92305	1.64832	2.38003	0.0173114	0.0576185	2.50051	-
ENSG00000080561	MID2	11.4818	3.62795	1.26398	2.87026	0.00410132	0.0170933	2.49686	up
ENSG00000166266	CUL5	365.113	2.58764	0.343887	7.52467	5.28552e-14	1.48639e-12	2.49522	up
ENSG00000168724	DNAJC21	1075.55	2.5535	0.279192	9.14606	5.90491e-20	3.33357e-18	2.49204	up
ENSG00000135913	USP37	152.401	2.68614	0.503238	5.33771	9.41303e-08	1.07874e-06	2.48907	up
ENSG00000134318	ROCK2	577.947	2.54498	0.270592	9.40524	5.19105e-21	3.31993e-19	2.48755	up
ENSG00000198604	BAZ1A	996.757	2.53761	0.254852	9.95717	2.34648e-23	1.84609e-21	2.48646	up
ENSG00000113810	SMC4	4320.37	2.5164	0.205299	12.2572	1.53643e-34	3.85586e-32	2.48336	up
ENSG00000075292	ZNF638	711.215	2.53643	0.261038	9.7167	2.55932e-22	1.84513e-20	2.48302	up
ENSG00000168491	CCDC110	62.3689	2.7532	0.604186	4.55688	5.192e-06	4.42357e-05	2.48292	up
ENSG00000154479	CFAP210	50.9817	2.72442	0.640358	4.25452	2.09496e-05	0.000156498	2.47984	up
ENSG00000123612	ACVR1C	89.5205	3.12357	0.941483	3.31772	0.000907562	0.00461604	2.4765	up
ENSG00000241923	RPL14P3	51.4156	3.124	0.997802	3.13088			2.47638	-
ENSG00000111642	CHD4	820.59	2.53745	0.279316	9.08451	1.04165e-19	5.73658e-18	2.47442	up
ENSG00000033178	UBA6	475.537	2.52275	0.252282	9.99973	1.52809e-23	1.22161e-21	2.47319	up
ENSG00000231752	EMBP1	58.987	3.16559	0.933871	3.38975	0.000699567	0.00366436	2.472	up
ENSG00000075213	SEMA3A	57.0822	2.83406	0.691922	4.09593	4.20481e-05	0.000295934	2.47046	up
ENSG00000196693	ZNF33B	443.156	2.55465	0.334668	7.6334	2.28648e-14	6.76595e-13	2.46939	up
ENSG00000101752	MIB1	474.665	2.5875	0.386617	6.69266	2.19144e-11	4.37979e-10	2.46899	up
ENSG00000096696	DSP	399.59	2.57837	0.377923	6.82247	8.94854e-12	1.89747e-10	2.46442	up
ENSG00000248347		58.9188	3.03219	0.845998	3.58415	0.000338178	0.00192277	2.46415	up
ENSG00000047365	ARAP2	31.9767	2.81063	0.705516	3.9838	6.78233e-05	0.000454586	2.46162	up
ENSG00000136824	SMC2	1074.93	2.53288	0.3028	8.36487	6.01816e-17	2.39591e-15	2.46162	up
ENSG00000111879	FAM184A	266.675	2.57218	0.376934	6.82396	8.85644e-12	1.88197e-10	2.46145	up
ENSG00000187079	TEAD1	476.814	2.59278	0.412289	6.28874	3.20053e-10	5.51771e-09	2.46109	up
ENSG00000234420	ZNF37BP	299.44	2.66175	0.516226	5.15617	2.52053e-07	2.69827e-06	2.46032	up
ENSG00000250568		33.0376	2.70723	0.650487	4.16185	3.15673e-05	0.000227087	2.45547	up
ENSG00000100523	DDHD1	137.217	2.57964	0.390886	6.59947	4.12629e-11	7.96e-10	2.45528	up
ENSG00000231074	HCG18	434.094	2.52535	0.307496	8.21263	2.1639e-16	8.23444e-15	2.45484	up
ENSG00000128923	MINDY2	1967.01	2.59818	0.433864	5.98847	2.11831e-09	3.18404e-08	2.45452	up
ENSG00000186472	PCLO	171.456	2.59206	0.422587	6.13379	8.58073e-10	1.37527e-08	2.45383	up
ENSG00000154188	ANGPT1	58.6318	3.49548	1.12029	3.12016	0.00180754	0.00843602	2.45202	up
ENSG00000206557	TRIM71	243.562	2.51076	0.281839	8.90849	5.17308e-19	2.67087e-17	2.4516	up
ENSG00000287059		5.05561	5.93737	2.32567	2.55297	0.0106809	0.0386	2.45018	up
ENSG00000139746	RBM26	534.04	2.56802	0.393387	6.52799	6.66587e-11	1.25625e-09	2.4496	up
ENSG00000140015	KCNH5	28.0041	2.98206	0.777866	3.83365	0.000126257	0.000793571	2.44921	up
ENSG00000134852	CLOCK	159.389	2.54554	0.357652	7.11737	1.10007e-12	2.64365e-11	2.44809	up
ENSG00000113231	PDE8B	37.1918	3.49078	1.16854	2.98731	0.00281444	0.0123367	2.44671	up
ENSG00000071794	HLTF	964.465	2.57301	0.405984	6.3377	2.33213e-10	4.06299e-09	2.44389	up
ENSG00000115464	USP34	265.558	2.55049	0.375674	6.78911	1.1283e-11	2.34482e-10	2.44243	up
ENSG00000116678	LEPR	110.836	2.59717	0.453747	5.72382	1.04157e-08	1.41053e-07	2.44099	up
ENSG00000165209	STRBP	644.816	2.5752	0.416722	6.17966	6.42393e-10	1.05257e-08	2.43971	up
ENSG00000117620	SLC35A3	320.04	2.51529	0.32672	7.69862	1.37542e-14	4.19524e-13	2.43483	up
ENSG00000147905	ZCCHC7	696.753	2.47294	0.232732	10.6257	2.26359e-26	2.52123e-24	2.43208	up
ENSG00000173588	CEP83	182.167	2.63184	0.519262	5.06843	4.01115e-07	4.14841e-06	2.43151	up
ENSG00000046651	OFD1	374.862	2.48125	0.2584	9.60234	7.81496e-22	5.37984e-20	2.43091	up
ENSG00000006468	ETV1	59.2356	2.56019	0.424989	6.02414	1.70016e-09	2.5877e-08	2.43011	up
ENSG00000139351	SYCP3	26.2719	2.91368	0.814425	3.57759	0.000346774	0.00196883	2.42633	up
ENSG00000151917	BEND6	79.9287	2.60521	0.49114	5.3044	1.13043e-07	1.28141e-06	2.42512	up
ENSG00000197860	SGTB	251.497	2.55622	0.427066	5.98553	2.15687e-09	3.23465e-08	2.42135	up
ENSG00000198521	ZNF43	595.885	2.53917	0.404107	6.28342	3.31208e-10	5.70012e-09	2.41685	up
ENSG00000173930	SLCO4C1	19.3343	2.67547	0.726802	3.68116	0.000232179	0.00137122	2.41553	up
ENSG00000169213	RAB3B	1351.43	2.48188	0.297757	8.33524	7.73392e-17	3.05443e-15	2.41439	up
ENSG00000023516	AKAP11	218.357	2.53149	0.393091	6.43996	1.19507e-10	2.16181e-09	2.41315	up
ENSG00000138083	SIX3	381.293	2.51174	0.372428	6.74424	1.53835e-11	3.14425e-10	2.40751	up
ENSG00000115904	SOS1	264.534	2.49028	0.334453	7.44583	9.63352e-14	2.61636e-12	2.40685	up
ENSG00000173273	TNKS	365.102	2.49206	0.332352	7.49826	6.46717e-14	1.79326e-12	2.40676	up
ENSG00000140836	ZFHX3	768.771	2.49238	0.337594	7.38278	1.55022e-13	4.07083e-12	2.40482	up
ENSG00000285669		16.5995	3.41516	1.25362	2.72424	0.00644487	0.0251726	2.39864	up
ENSG00000196437	ZNF569	402.234	2.5464	0.460475	5.52994	3.20335e-08	3.99683e-07	2.39219	up
ENSG00000080200	CRYBG3	75.373	2.75678	0.685809	4.01975	5.82601e-05	0.00039693	2.39122	up
ENSG00000176049	JAKMIP2	7.4001	3.97101	1.69106	2.34824	0.0188623	0.0617715	2.39068	-
ENSG00000198862	LTN1	144.673	2.52308	0.415868	6.06702	1.30301e-09	2.01301e-08	2.39063	up
ENSG00000005483	KMT2E	717.803	2.45435	0.292172	8.40036	4.45123e-17	1.8084e-15	2.39014	up
ENSG00000237499	WAKMAR2	8.55864	3.23927	1.26579	2.55908	0.0104949	0.0380666	2.38982	up
ENSG00000131969	ABHD12B	5.76376	3.48494	1.44662	2.40903	0.0159952	0.0538862	2.38747	-
ENSG00000235652	EPM2A-DT	25.7833	2.95885	0.937653	3.15559	0.00160174	0.0076117	2.38731	up
ENSG00000272461		5.48632	3.46563	1.46927	2.35873	0.0183375	0.0602817	2.38266	-
ENSG00000180263	FGD6	104.831	2.49351	0.393243	6.34088	2.2845e-10	3.99404e-09	2.37607	up
ENSG00000273014		27.955	3.18345	1.08217	2.94172	0.00326395	0.014028	2.37503	up
ENSG00000117523	PRRC2C	2327.46	2.45933	0.336946	7.29888	2.90181e-13	7.44259e-12	2.37435	up
ENSG00000152582	SPEF2	110.365	2.66551	0.628807	4.239	2.24521e-05	0.000166468	2.37027	up
ENSG00000102753	KPNA3	851.667	2.42627	0.277584	8.7407	2.31679e-18	1.11759e-16	2.36941	up
ENSG00000168769	TET2	175.587	2.58037	0.536154	4.81274	1.48874e-06	1.39291e-05	2.36898	up
ENSG00000100503	NIN	446.948	2.43236	0.294056	8.27176	1.31993e-16	5.12112e-15	2.36867	up
ENSG00000133138	TBC1D8B	100.012	3.05856	0.999811	3.05914	0.00221974	0.0100637	2.36866	up
ENSG00000137941	TTLL7	133.281	2.5246	0.46225	5.46154	4.72017e-08	5.73419e-07	2.36693	up
ENSG00000235613	NSRP1P1	4.90769	3.60696	1.43379	2.51568	0.0118803	0.0422415	2.36648	up
ENSG00000129534	MIS18BP1	887.122	2.41763	0.262424	9.21271	3.17999e-20	1.87081e-18	2.36626	up
ENSG00000172915	NBEA	99.9602	2.57876	0.531766	4.84943	1.23817e-06	1.16784e-05	2.36563	up
ENSG00000113318	MSH3	414.382	2.46599	0.370688	6.65246	2.88238e-11	5.66925e-10	2.3639	up
ENSG00000144152	FBLN7	17.8465	2.81952	0.83928	3.35945	0.000780988	0.00404173	2.36234	up
ENSG00000066933	MYO9A	650.356	2.42907	0.297798	8.15677	3.44113e-16	1.27283e-14	2.36173	up
ENSG00000175455	CCDC14	469.773	2.43895	0.329971	7.3914	1.45286e-13	3.8406e-12	2.35939	up
ENSG00000129204	USP6	13.6509	6.93501	2.26407	3.06307	0.00219081	0.00995988	2.35839	up
ENSG00000215895	HSPA5P1	4.5705	3.75093	1.58662	2.36409	0.0180742	0.0595941	2.35224	-
ENSG00000151553	FHIP2A	25.2505	2.71322	0.682463	3.97564	7.01916e-05	0.000468086	2.35105	up
ENSG00000234493	RHOXF1P1	189.669	2.43277	0.340089	7.15332	8.47011e-13	2.05041e-11	2.35067	up
ENSG00000118193	KIF14	472.711	2.4687	0.402683	6.13063	8.75341e-10	1.39843e-08	2.35026	up
ENSG00000276115		10.2242	3.13485	1.19588	2.62137	0.00875775	0.0326866	2.33677	up
ENSG00000183337	BCOR	919.908	2.39381	0.278448	8.59696	8.18536e-18	3.70509e-16	2.33537	up
ENSG00000009954	BAZ1B	1263.32	2.39282	0.27771	8.61624	6.91888e-18	3.15342e-16	2.33527	up
ENSG00000197299	BLM	312.793	2.49955	0.477133	5.23869	1.61721e-07	1.79222e-06	2.33507	up
ENSG00000185869	ZNF829	322.387	2.44609	0.398115	6.14419	8.03743e-10	1.28924e-08	2.33346	up
ENSG00000102786	INTS6	304.603	2.37804	0.248241	9.57956	9.7459e-22	6.66283e-20	2.33202	up
ENSG00000138587	MNS1	529.998	2.37183	0.242063	9.79839	1.14397e-22	8.43136e-21	2.3293	up
ENSG00000107290	SETX	193.991	2.43134	0.376523	6.45734	1.06562e-10	1.94003e-09	2.32904	up
ENSG00000132842	AP3B1	564.577	2.38695	0.280114	8.52135	1.57699e-17	6.79682e-16	2.32883	up
ENSG00000118557	PMFBP1	8.64276	5.63465	2.21182	2.54752	0.0108493	0.0391514	2.32732	up
ENSG00000123684	LPGAT1	939.655	2.42758	0.377422	6.43201	1.25925e-10	2.26962e-09	2.32479	up
ENSG00000174485	DENND4A	320.065	2.37426	0.258525	9.18388	4.15831e-20	2.39659e-18	2.32462	up
ENSG00000182168	UNC5C	6.28941	4.47163	2.21825	2.01584	0.0438168	0.12258	2.31956	-
ENSG00000128573	FOXP2	21.4351	3.50351	1.43782	2.43668	0.0148227	0.0507381	2.31894	-
ENSG00000244265	SIAH2-AS1	15.3785	2.70227	0.861657	3.13613	0.00171192	0.00806099	2.31877	up
ENSG00000145362	ANK2	109.048	2.44638	0.408187	5.99328	2.05645e-09	3.09342e-08	2.31794	up
ENSG00000198429	ZNF69	61.1746	2.77717	0.840862	3.30277	0.000957346	0.00484069	2.31722	up
ENSG00000134597	RBMX2	1525.28	2.35662	0.250532	9.40647	5.13061e-21	3.29189e-19	2.31139	up
ENSG00000141429	GALNT1	694.264	2.42596	0.402461	6.02781	1.66196e-09	2.53267e-08	2.30956	up
ENSG00000053254	FOXN3	615.303	2.395	0.340229	7.03937	1.93115e-12	4.47802e-11	2.30911	up
ENSG00000101596	SMCHD1	418.889	2.37779	0.311618	7.63049	2.33865e-14	6.90999e-13	2.30762	up
ENSG00000122299	ZC3H7A	394.806	2.34972	0.237799	9.88115	5.02545e-23	3.86181e-21	2.30665	up
ENSG00000146463	ZMYM4	340.851	2.3973	0.356859	6.71777	1.84526e-11	3.74837e-10	2.30417	up
ENSG00000177853	ZNF518A	232.785	2.38175	0.332777	7.1572	8.23408e-13	1.99815e-11	2.30375	up
ENSG00000166439	RNF169	98.3618	2.81912	0.80256	3.51266	0.000443641	0.00245003	2.30188	up
ENSG00000070018	LRP6	444.726	2.36424	0.297706	7.94151	1.99736e-15	6.68915e-14	2.29806	up
ENSG00000183943	PRKX	1130.93	2.38687	0.354867	6.7261	1.74273e-11	3.55466e-10	2.29578	up
ENSG00000258890	CEP95	398.518	2.38967	0.365026	6.54658	5.88714e-11	1.11692e-09	2.29336	up
ENSG00000179455	MKRN3	71.4079	2.60231	0.671435	3.87574	0.000106301	0.000683594	2.2932	up
ENSG00000278931		7.16537	3.1586	1.18062	2.67537	0.00746472	0.02851	2.29021	up
ENSG00000186871	ERCC6L	175.263	2.4135	0.413496	5.83682	5.32074e-09	7.51881e-08	2.29019	up
ENSG00000163629	PTPN13	555.094	2.35428	0.30676	7.67465	1.65869e-14	4.98259e-13	2.28526	up
ENSG00000278492		3.57456	5.61719	2.59228	2.16689	0.0302429	0.0908755	2.28333	-
ENSG00000159712	ANKRD18CP	20.0606	3.51372	1.28902	2.72589	0.00641279	0.0250621	2.28068	up
ENSG00000268364	SMC5-DT	38.1185	2.81934	0.960963	2.93387	0.00334761	0.0143471	2.28032	up
ENSG00000151835	SACS	483.998	2.41071	0.431846	5.58235	2.37293e-08	3.02739e-07	2.27855	up
ENSG00000001629	ANKIB1	266.557	2.34346	0.308191	7.60392	2.87297e-14	8.4011e-13	2.27573	up
ENSG00000279103		9.11247	2.92545	1.08108	2.70605	0.00680892	0.0263763	2.26998	up
ENSG00000197385	ZNF860	6.31298	3.08368	1.36634	2.25689	0.0240152	0.0755994	2.26962	-
ENSG00000139132	FGD4	106.017	2.60885	0.680515	3.83364	0.000126261	0.000793571	2.26947	up
ENSG00000185630	PBX1	398.764	2.39207	0.413406	5.78624	7.1979e-09	1.00004e-07	2.26933	up
ENSG00000230797	YY2	46.656	2.71082	0.807055	3.3589	0.000782534	0.00404867	2.265	up
ENSG00000278383		26.2181	3.32992	1.26582	2.63063	0.00852269	0.0319772	2.2645	up
ENSG00000230091	TMEM254-AS1	51.319	2.38289	0.502969	4.73764	2.16216e-06	1.9709e-05	2.26435	up
ENSG00000149548	CCDC15	117.69	2.43083	0.482663	5.03628	4.7466e-07	4.81836e-06	2.264	up
ENSG00000072657	TRHDE	17.7577	2.68892	0.8923	3.01347	0.0025828	0.0114633	2.26353	up
ENSG00000178691	SUZ12	716.685	2.28951	0.190634	12.01	3.14804e-33	6.71109e-31	2.26352	up
ENSG00000100578	KIAA0586	331.93	2.37692	0.403351	5.89293	3.79412e-09	5.48667e-08	2.26122	up
ENSG00000166501	PRKCB	102.972	2.597	0.641766	4.04664	5.19581e-05	0.000358677	2.25913	up
ENSG00000181555	SETD2	538.786	2.39962	0.448155	5.35443	8.58246e-08	9.92162e-07	2.25623	up
ENSG00000234145	NAP1L4P3	11.5366	2.80117	0.964253	2.90501	0.00367241	0.0155476	2.25493	up
ENSG00000176105	YES1	784.686	2.3564	0.387047	6.08814	1.14228e-09	1.78181e-08	2.25276	up
ENSG00000151718	WWC2	575.076	2.31053	0.287569	8.0347	9.38062e-16	3.29169e-14	2.25184	up
ENSG00000143494	VASH2	190.413	2.33385	0.347583	6.71451	1.88706e-11	3.82153e-10	2.25145	up
ENSG00000075568	TMEM131	251.392	2.33636	0.342823	6.81508	9.42144e-12	1.99136e-10	2.25124	up
ENSG00000289353		75.0995	2.37361	0.432535	5.48767	4.07268e-08	5.00899e-07	2.2507	up
ENSG00000130224	LRCH2	122.269	2.37317	0.423045	5.60974	2.02631e-08	2.61888e-07	2.25003	up
ENSG00000283757		6.50573	3.24288	1.61083	2.01317	0.044097	0.123206	2.24793	-
ENSG00000137601	NEK1	403.047	2.37173	0.421645	5.62494	1.85568e-08	2.41567e-07	2.24676	up
ENSG00000268696	ZNF723	6.66204	2.95041	1.2078	2.4428	0.0145737	0.0500151	2.24601	-
ENSG00000047410	TPR	1324.67	2.29582	0.268752	8.54251	1.31339e-17	5.76108e-16	2.24511	up
ENSG00000133103	COG6	318.975	2.3028	0.284214	8.10234	5.39125e-16	1.93987e-14	2.24506	up
ENSG00000070756	PABPC1	58969.8	2.2795	0.223592	10.1949	2.08925e-24	1.90882e-22	2.24426	up
ENSG00000122691	TWIST1	85.6127	2.46735	0.555879	4.43864	9.05272e-06	7.35008e-05	2.24047	up
ENSG00000122482	ZNF644	573.285	2.33758	0.37341	6.2601	3.8472e-10	6.53036e-09	2.23951	up
ENSG00000186687	LYRM7	1299.69	2.28118	0.247742	9.20788	3.32614e-20	1.95101e-18	2.23865	up
ENSG00000087301	TXNDC16	167.039	2.3439	0.373625	6.2734	3.53252e-10	6.04799e-09	2.23827	up
ENSG00000257800	FNBP1P1	9.45408	2.95699	1.20738	2.4491	0.0143215	0.0493462	2.23765	up
ENSG00000118513	MYB	84.4952	2.43833	0.528584	4.61294	3.97008e-06	3.45678e-05	2.23675	up
ENSG00000126773	PCNX4	620.052	2.38353	0.463373	5.14387	2.69143e-07	2.86267e-06	2.23474	up
ENSG00000187109	NAP1L1	25717.9	2.31229	0.336843	6.8646	6.66794e-12	1.4385e-10	2.233	up
ENSG00000164168	TMEM184C	364.668	2.33343	0.39624	5.88893	3.88714e-09	5.60891e-08	2.22983	up
ENSG00000073711	PPP2R3A	136.212	2.32016	0.375801	6.17391	6.66196e-10	1.0844e-08	2.22289	up
ENSG00000196172	ZNF681	251.108	2.3668	0.46056	5.13895	2.76276e-07	2.93539e-06	2.22188	up
ENSG00000170396	ZNF804A	16.675	2.73137	0.988746	2.76246	0.0057367	0.0227608	2.22039	up
ENSG00000067715	SYT1	125.635	2.50814	0.64905	3.86432	0.000111399	0.000711743	2.21919	up
ENSG00000068366	ACSL4	156.449	2.31878	0.382558	6.06127	1.35055e-09	2.07888e-08	2.2186	up
ENSG00000133226	SRRM1	1799.2	2.24834	0.207781	10.8207	2.74541e-27	3.29882e-25	2.21816	up
ENSG00000177485	ZBTB33	153.395	2.46873	0.609384	4.05119	5.09587e-05	0.000352514	2.21728	up
ENSG00000155506	LARP1	1937.06	2.26339	0.265065	8.53898	1.35412e-17	5.9004e-16	2.21411	up
ENSG00000155970	MICU3	75.7814	2.35122	0.453172	5.18837	2.12138e-07	2.30457e-06	2.20997	up
ENSG00000156256	USP16	1667.49	2.23713	0.201248	11.1163	1.04498e-28	1.51225e-26	2.20902	up
ENSG00000287855		5.45809	5.1518	2.38563	2.15952	0.0308101	0.0921825	2.20838	-
ENSG00000145700	ANKRD31	6.19132	4.15497	1.80915	2.29664	0.0216394	0.0692532	2.20825	-
ENSG00000146373	RNF217	43.9592	2.61885	0.788858	3.3198	0.000900822	0.00458647	2.20638	up
ENSG00000181450	ZNF678	134.164	2.40086	0.543034	4.42119	9.81592e-06	7.91743e-05	2.20579	up
ENSG00000185736	ADARB2	5.66809	6.2013	2.63765	2.35107	0.0187194	0.0613789	2.20543	-
ENSG00000259969		12.3051	2.62705	0.953959	2.75384	0.00588999	0.0233037	2.20404	up
ENSG00000229721		2.57342	5.06718	2.40251	2.10912	0.0349345		2.20197	-
ENSG00000011347	SYT7	76.6925	2.4061	0.545843	4.40804	1.04311e-05	8.35586e-05	2.20149	up
ENSG00000198785	GRIN3A	2.33036	4.81453	2.19879	2.18962	0.0285515		2.20012	-
ENSG00000184785	SMIM10	338.217	2.26944	0.3209	7.0721	1.52606e-12	3.61477e-11	2.19939	up
ENSG00000147251	DOCK11	101.606	2.40352	0.51461	4.67056	3.00381e-06	2.68017e-05	2.19823	up
ENSG00000185621	LMLN	86.1152	2.49283	0.663279	3.75834	0.000171043	0.00104091	2.19493	up
ENSG00000198346	ZNF813	69.8036	2.40157	0.553062	4.34232	1.40985e-05	0.000109787	2.19176	up
ENSG00000225200		6327.77	2.70207	0.903544	2.99052	0.00278503	0.0122268	2.19133	up
ENSG00000163602	RYBP	377.41	2.32088	0.432176	5.37021	7.86447e-08	9.15567e-07	2.1909	up
ENSG00000114933	INO80D	91.7409	2.3853	0.547952	4.35312	1.34216e-05	0.000105052	2.18934	up
ENSG00000106004	HOXA5	61.4729	2.50932	0.669154	3.74998	0.000176847	0.00107255	2.18744	up
ENSG00000122417	ODF2L	246.842	2.41898	0.603862	4.00584	6.17962e-05	0.000417862	2.18699	up
ENSG00000223572	CKMT1A	58.9202	2.32305	0.459401	5.05669	4.26597e-07	4.39134e-06	2.18297	up
ENSG00000184811	TRARG1	16.8349	4.95472	1.82702	2.71191	0.00668966	0.0259701	2.18257	up
ENSG00000274383		5.17289	4.2574	1.76581	2.41102	0.0159081	0.0536568	2.18174	-
ENSG00000163605	PPP4R2	517.261	2.24838	0.309503	7.26449	3.7446e-13	9.44535e-12	2.18149	up
ENSG00000127311	HELB	51.2928	2.49934	0.669511	3.73308	0.000189155	0.0011378	2.17935	up
ENSG00000277778	PGM5P2	4.71081	3.17113	1.41019	2.24873	0.0245299	0.0769386	2.17922	-
ENSG00000163596	ICA1L	150.133	2.46519	0.664288	3.71103	0.000206419	0.00122971	2.17483	up
ENSG00000100077	GRK3	222.337	2.30886	0.451488	5.11389	3.15588e-07	3.32811e-06	2.16934	up
ENSG00000118276	B4GALT6	65.1374	2.57994	0.818781	3.15095	0.00162738	0.00771691	2.16808	up
ENSG00000119397	CNTRL	339.964	2.20029	0.215363	10.2167	1.66981e-24	1.55426e-22	2.16758	up
ENSG00000212127	TAS2R14	9.32117	2.88505	1.25168	2.30494	0.0211699	0.0680043	2.16703	-
ENSG00000133858	ZFC3H1	163.472	2.30583	0.452897	5.0913	3.55625e-07	3.71672e-06	2.16626	up
ENSG00000103657	HERC1	378.794	2.2261	0.302907	7.34912	1.99519e-13	5.19116e-12	2.16164	up
ENSG00000199523	RNA5SP226	11.0439	3.62075	1.44507	2.5056	0.0122245	0.0432637	2.16122	up
ENSG00000114739	ACVR2B	437.739	2.20134	0.242836	9.06513	1.24456e-19	6.7602e-18	2.16057	up
ENSG00000092439	TRPM7	277.764	2.2309	0.319411	6.98443	2.86023e-12	6.47338e-11	2.16051	up
ENSG00000134352	IL6ST	129.113	2.3699	0.551917	4.29394	1.75527e-05	0.000133641	2.16018	up
ENSG00000080345	RIF1	759.877	2.20059	0.246001	8.94545	3.70444e-19	1.93135e-17	2.15944	up
ENSG00000229267	SNHG31	29.8114	2.55082	0.840938	3.03331	0.00241889	0.0108408	2.15938	up
ENSG00000196109	ZNF676	108.083	2.49633	0.71416	3.49548	0.000473208	0.00259166	2.15923	up
ENSG00000233396	LINC01719	11.0364	3.01242	1.25923	2.39228	0.0167443	0.05603	2.15904	-
ENSG00000070961	ATP2B1	1394.64	2.21111	0.275417	8.02822	9.88933e-16	3.45795e-14	2.15898	up
ENSG00000223571	DHRSX-IT1	5.766	5.94011	2.27587	2.61004	0.00905316	0.0336372	2.15885	up
ENSG00000032219	ARID4A	291.322	2.21252	0.277552	7.97152	1.56735e-15	5.32094e-14	2.15864	up
ENSG00000160229	ZNF66	97.7729	2.48605	0.742358	3.34885	0.000811471	0.00418528	2.15753	up
ENSG00000038427	VCAN	583.094	2.24247	0.357135	6.27907	3.40602e-10	5.84257e-09	2.15628	up
ENSG00000272529		3.22743	5.38882	2.55406	2.1099	0.0348667	0.102168	2.15561	-
ENSG00000229336	SREK1IP1P1	8.72502	2.75325	0.996232	2.76367	0.00571556	0.0226815	2.15424	up
ENSG00000115232	ITGA4	158.146	2.3469	0.538219	4.36049	1.29774e-05	0.000101958	2.15208	up
ENSG00000180336	MEIOC	67.192	2.31284	0.479675	4.82168	1.42351e-06	1.33566e-05	2.15159	up
ENSG00000116903	EXOC8	61.6637	2.52111	0.743789	3.38955	0.000700075	0.00366606	2.15087	up
ENSG00000213139	CRYGS	5.57473	3.17414	1.41317	2.24611	0.0246973	0.077378	2.14966	-
ENSG00000170381	SEMA3E	167.451	2.24258	0.351514	6.37977	1.77359e-10	3.13398e-09	2.14936	up
ENSG00000090612	ZNF268	190.439	2.33548	0.531165	4.39691	1.09804e-05	8.76396e-05	2.14887	up
ENSG00000272425		2.98595	5.07285	2.32445	2.18239	0.0290809	0.0881049	2.14798	-
ENSG00000075151	EIF4G3	394.637	2.20867	0.303107	7.28677	3.1748e-13	8.04905e-12	2.14531	up
ENSG00000225357	RPF2P1	16.6046	2.67659	0.889825	3.008	0.00262975	0.0116456	2.14486	up
ENSG00000119927	GPAM	181.613	2.21337	0.327908	6.74997	1.47876e-11	3.02558e-10	2.14356	up
ENSG00000123124	WWP1	261.73	2.1984	0.285118	7.71046	1.25361e-14	3.85272e-13	2.14348	up
ENSG00000138658	ZGRF1	152.635	2.25251	0.404505	5.56855	2.56868e-08	3.2541e-07	2.14301	up
ENSG00000259775	EIF5-DT	6.97335	3.54511	1.51064	2.34676	0.0189375	0.061946	2.14224	-
ENSG00000168779	SHOX2	146.711	2.2756	0.454247	5.00961	5.45396e-07	5.45836e-06	2.14139	up
ENSG00000154174	TOMM70	1175.84	2.21866	0.338208	6.56007	5.37835e-11	1.02431e-09	2.14119	up
ENSG00000129003	VPS13C	334.595	2.19919	0.292201	7.52628	5.22049e-14	1.47019e-12	2.14099	up
ENSG00000091136	LAMB1	690.918	2.19331	0.278786	7.86734	3.62273e-15	1.18327e-13	2.14067	up
ENSG00000261098		29.3094	2.56471	0.845435	3.0336	0.00241658	0.0108374	2.14046	up
ENSG00000125864	BFSP1	59.477	2.30658	0.511003	4.51384	6.36656e-06	5.33264e-05	2.13947	up
ENSG00000138246	DNAJC13	200.14	2.23496	0.372626	5.99785	1.99942e-09	3.0122e-08	2.1391	up
ENSG00000101639	CEP192	302.376	2.23535	0.383344	5.8312	5.50316e-09	7.76553e-08	2.13464	up
ENSG00000172901	LVRN	7.45834	3.06702	1.31176	2.33809	0.0193826	0.0631935	2.13462	-
ENSG00000144228	SPOPL	99.9036	2.28309	0.479021	4.76615	1.87776e-06	1.72995e-05	2.13328	up
ENSG00000076770	MBNL3	122.85	2.2109	0.354769	6.23195	4.60675e-10	7.74669e-09	2.13239	up
ENSG00000182389	CACNB4	91.5124	2.34504	0.578206	4.05571	4.99822e-05	0.000346122	2.13198	up
ENSG00000227199	ST7-AS1	6.41616	3.82816	1.62132	2.36113	0.0182193	0.0599926	2.1319	-
ENSG00000095951	HIVEP1	67.5801	2.40009	0.617809	3.88483	0.000102401	0.000661087	2.13186	up
ENSG00000267249		28.0648	3.24468	1.29966	2.49655	0.0125409	0.0441234	2.13161	up
ENSG00000102554	KLF5	251.932	2.23389	0.387886	5.75915	8.4538e-09	1.16231e-07	2.13029	up
ENSG00000163558	PRKCI	544.313	2.19626	0.311802	7.04377	1.87106e-12	4.34374e-11	2.13025	up
ENSG00000253517	XRCC6P4	6.62326	3.4613	1.5138	2.28649	0.0222255	0.0708883	2.12924	-
ENSG00000082438	COBLL1	63.1021	2.49172	0.787341	3.16473	0.00155228	0.00741221	2.12915	up
ENSG00000138758	SEPTIN11	1713.88	2.15574	0.198651	10.8519	1.95257e-27	2.41947e-25	2.12901	up
ENSG00000197020	ZNF100	173.613	2.1744	0.270985	8.02407	1.02298e-15	3.5707e-14	2.12855	up
ENSG00000220184	HMGB3P18	3.36501	5.56551	2.82616	1.96929	0.0489202	0.133704	2.12699	-
ENSG00000237984	PTENP1	18.6653	2.88905	1.18815	2.43156	0.0150338	0.0513014	2.1235	-
ENSG00000180071	ANKRD18A	80.4942	2.26021	0.449448	5.02885	4.9342e-07	4.98092e-06	2.12327	up
ENSG00000111670	GNPTAB	587.549	2.16529	0.254307	8.51447	1.67356e-17	7.18182e-16	2.12234	up
ENSG00000275318		7.67906	2.5414	1.0233	2.48354	0.0130084	0.0454699	2.12232	up
ENSG00000100485	SOS2	108.369	2.26945	0.474195	4.7859	1.70223e-06	1.57851e-05	2.12091	up
ENSG00000198554	WDHD1	679.793	2.19128	0.322919	6.78583	1.15417e-11	2.39608e-10	2.12072	up
ENSG00000151690	MFSD6	154.695	2.19431	0.33518	6.54667	5.88342e-11	1.11692e-09	2.11992	up
ENSG00000066777	ARFGEF1	408.139	2.19898	0.341146	6.44584	1.1496e-10	2.08908e-09	2.11989	up
ENSG00000269069		5.74901	3.18829	1.62298	1.96447	0.0494757	0.134814	2.11762	-
ENSG00000180229	HERC2P3	77.0594	2.2428	0.445724	5.03182	4.85841e-07	4.91443e-06	2.11658	up
ENSG00000099337	KCNK6	464.694	2.20099	0.360541	6.10469	1.02999e-09	1.62455e-08	2.11641	up
ENSG00000091009	RBM27	206.662	2.18504	0.323196	6.76071	1.37318e-11	2.83001e-10	2.11607	up
ENSG00000163535	SGO2	633.149	2.16171	0.264031	8.18733	2.67086e-16	1.00479e-14	2.11556	up
ENSG00000198836	OPA1	672.236	2.15646	0.249674	8.63711	5.76551e-18	2.64599e-16	2.1151	up
ENSG00000187240	DYNC2H1	372.458	2.19034	0.342082	6.40297	1.52381e-10	2.72171e-09	2.11315	up
ENSG00000139083	ETV6	111.51	2.20589	0.370086	5.96047	2.51513e-09	3.74362e-08	2.11297	up
ENSG00000271992		22.6033	2.47353	0.731305	3.38235	0.000718691	0.00375165	2.11132	up
ENSG00000179981	TSHZ1	211.987	2.1789	0.320453	6.79944	1.05024e-11	2.19179e-10	2.11116	up
ENSG00000141431	ASXL3	33.7196	2.64587	0.964232	2.74402	0.00606915	0.0238981	2.11053	up
ENSG00000113649	TCERG1	1065.45	2.14172	0.217315	9.85541	6.49507e-23	4.91493e-21	2.11021	up
ENSG00000147202	DIAPH2	202.022	2.19209	0.350076	6.26175	3.80681e-10	6.47843e-09	2.10702	up
ENSG00000182158	CREB3L2	250.54	2.16131	0.290238	7.44667	9.57254e-14	2.60336e-12	2.10587	up
ENSG00000175544	CABP4	27.6555	2.60561	0.93833	2.77686	0.00548877	0.0219131	2.10582	up
ENSG00000289311		9.49246	2.78752	1.13644	2.45286	0.0141727	0.048927	2.1058	up
ENSG00000152409	JMY	242.404	2.2006	0.369289	5.95901	2.53769e-09	3.77421e-08	2.10472	up
ENSG00000118922	KLF12	69.0429	2.30048	0.547579	4.20117	2.65535e-05	0.000193832	2.1039	up
ENSG00000198087	CD2AP	281.955	2.18443	0.349089	6.25753	3.91124e-10	6.63339e-09	2.1037	up
ENSG00000127914	AKAP9	1359.78	2.14241	0.244276	8.77046	1.7794e-18	8.7976e-17	2.10284	up
ENSG00000225465	RFPL1S	35.5218	2.40585	0.683717	3.51877	0.000433545	0.00239963	2.10203	up
ENSG00000107485	GATA3	251.356	2.20752	0.398988	5.53281	3.1514e-08	3.93944e-07	2.10162	up
ENSG00000239941	LINC02917	3.33348	5.55209	2.84652	1.95048	0.0511186	0.138396	2.10112	-
ENSG00000198000	NOL8	653.815	2.1486	0.268777	7.99399	1.30641e-15	4.50449e-14	2.10099	up
ENSG00000157741	UBN2	140.17	2.36468	0.63503	3.72373	0.0001963	0.00117596	2.09346	up
ENSG00000153157	SYCP2L	78.2328	2.44969	0.701779	3.49068	0.000481792	0.00263431	2.09253	up
ENSG00000260296		7.94127	4.08502	1.71501	2.38192	0.0172226	0.0573778	2.09234	-
ENSG00000285336		4.22504	5.65399	2.43798	2.31913	0.0203881	0.0658975	2.09171	-
ENSG00000196628	TCF4	541.316	2.13905	0.271155	7.88867	3.05412e-15	1.00416e-13	2.091	up
ENSG00000115896	PLCL1	11.4781	3.4593	1.45955	2.37012	0.0177826	0.0587889	2.09059	-
ENSG00000145824	CXCL14	728.015	2.21882	0.448863	4.9432	7.68514e-07	7.48358e-06	2.09008	up
ENSG00000287778		43.404	2.67716	0.953041	2.80907			2.08776	-
ENSG00000143702	CEP170	156.913	2.15772	0.331731	6.50443	7.79867e-11	1.4518e-09	2.08709	up
ENSG00000130818	ZNF426	340.823	2.1552	0.3255	6.62119	3.56321e-11	6.89885e-10	2.08693	up
ENSG00000164463	CREBRF	42.8231	2.32633	0.617854	3.76517	0.000166435	0.00101562	2.08668	up
ENSG00000115020	PIKFYVE	148.171	2.16744	0.352165	6.1546	7.52661e-10	1.21319e-08	2.08633	up
ENSG00000198919	DZIP3	284.577	2.1796	0.380782	5.72402	1.04033e-08	1.40982e-07	2.08463	up
ENSG00000136874	STX17	243.927	2.15054	0.319504	6.73088	1.68636e-11	3.44323e-10	2.08436	up
ENSG00000048405	ZNF800	140.41	2.19074	0.403608	5.42789	5.70244e-08	6.81885e-07	2.08351	up
ENSG00000128596	CCDC136	94.2754	2.26571	0.508039	4.45971	8.20707e-06	6.72092e-05	2.07998	up
ENSG00000154001	PPP2R5E	477.61	2.10389	0.200469	10.4948	9.12464e-26	9.47147e-24	2.07718	up
ENSG00000198286	CARD11	9.19005	4.57437	2.36065	1.93776			2.07522	-
ENSG00000111647	UHRF1BP1L	241.667	2.11813	0.260358	8.13546	4.10372e-16	1.50389e-14	2.07484	up
ENSG00000184661	CDCA2	732.858	2.14375	0.322753	6.64207	3.09306e-11	6.05959e-10	2.07451	up
ENSG00000130449	ZSWIM6	103.822	2.35178	0.651075	3.61215	0.000303669	0.00174864	2.07204	up
ENSG00000267892		19.1092	2.51072	0.967023	2.59634	0.00942228	0.034774	2.06929	up
ENSG00000173230	GOLGB1	453.803	2.24048	0.515514	4.3461	1.38582e-05	0.000108128	2.06892	up
ENSG00000197016	ZNF470	69.6102	2.34033	0.657245	3.56082	0.000369701	0.00208289	2.06811	up
ENSG00000058091	CDK14	88.4028	2.1912	0.441734	4.96044	7.03332e-07	6.87587e-06	2.0672	up
ENSG00000186660	ZFP91	368.236	2.12705	0.301733	7.04945	1.7962e-12	4.17976e-11	2.0668	up
ENSG00000287806		6.54365	3.2645	1.51438	2.15566	0.0311102	0.0928903	2.06626	-
ENSG00000156804	FBXO32	30.975	2.59998	0.865425	3.00428	0.00266209	0.011773	2.0661	up
ENSG00000128512	DOCK4	54.6922	2.35983	0.652815	3.61485	0.000300522	0.00173353	2.06591	up
ENSG00000155545	MIER3	114.492	2.13952	0.345777	6.18756	6.11043e-10	1.00621e-08	2.06544	up
ENSG00000106052	TAX1BP1	1979.32	2.10182	0.23607	8.90338	5.41728e-19	2.78969e-17	2.0652	up
ENSG00000151292	CSNK1G3	372.235	2.16811	0.406023	5.33988	9.30063e-08	1.06771e-06	2.06209	up
ENSG00000139354	GAS2L3	139.93	2.12397	0.31153	6.81786	9.24074e-12	1.95734e-10	2.06051	up
ENSG00000092148	HECTD1	376.747	2.1076	0.266704	7.90239	2.73607e-15	9.0409e-14	2.06015	up
ENSG00000203727	SAMD5	85.6008	2.4462	0.834501	2.93133	0.00337514	0.0144526	2.06014	up
ENSG00000280399		4.3071	3.00083	1.48396	2.02217	0.0431585	0.121336	2.05843	-
ENSG00000275580		5.23042	3.13499	1.65654	1.8925	0.058425	0.153829	2.05801	-
ENSG00000149212	SESN3	97.7926	2.27485	0.565775	4.02076	5.80096e-05	0.000395495	2.05793	up
ENSG00000109670	FBXW7	400.232	2.10305	0.267923	7.84944	4.17905e-15	1.35161e-13	2.05671	up
ENSG00000135248	GARIN1B	8.51277	2.54912	1.03755	2.45686	0.0140158	0.0484613	2.05607	up
ENSG00000271828		15.4997	4.85186	1.92907	2.51513	0.0118988	0.0422996	2.05602	up
ENSG00000068796	KIF2A	915.771	2.10149	0.266274	7.89219	2.96925e-15	9.7788e-14	2.0556	up
ENSG00000236699	ARHGEF38	6.99038	3.16971	1.42193	2.22915	0.0258037	0.0800476	2.05471	-
ENSG00000169607	CKAP2L	581.76	2.11546	0.311006	6.80199	1.03183e-11	2.15565e-10	2.05263	up
ENSG00000121879	PIK3CA	188.707	2.13143	0.344203	6.19237	5.92667e-10	9.78369e-09	2.0517	up
ENSG00000037757	MRI1	284.654	2.13033	0.359191	5.93092	3.01244e-09	4.4175e-08	2.05018	up
ENSG00000113356	POLR3G	472.426	2.15438	0.413933	5.20467	1.94345e-07	2.1276e-06	2.04687	up
ENSG00000096968	JAK2	73.6123	2.51283	0.83704	3.00204	0.00268175	0.0118441	2.04586	up
ENSG00000115825	PRKD3	331.597	2.17413	0.448778	4.84455	1.26899e-06	1.19577e-05	2.04535	up
ENSG00000152495	CAMK4	351.133	2.15997	0.426313	5.06662	4.04947e-07	4.18586e-06	2.04526	up
ENSG00000198920	KIAA0753	68.8683	2.17502	0.471475	4.61322	3.96477e-06	3.45367e-05	2.0449	up
ENSG00000228331	RPL17P43	14.9273	2.93966	1.22138	2.40683	0.0160917	0.0541745	2.04449	-
ENSG00000119900	OGFRL1	299.429	2.09503	0.279217	7.50322	6.22692e-14	1.73392e-12	2.04443	up
ENSG00000170160	CCDC144A	10.8562	2.74112	1.25807	2.17883	0.0293442	0.0886858	2.04436	-
ENSG00000091844	RGS17	174.573	2.24213	0.571453	3.92355	8.72527e-05	0.000572237	2.04348	up
ENSG00000143458	GABPB2	164.761	2.16847	0.445115	4.8717	1.10643e-06	1.05058e-05	2.04224	up
ENSG00000253636		6.1458	3.02608	1.43004	2.11608	0.0343381	0.100842	2.04124	-
ENSG00000104517	UBR5	388.518	2.09336	0.292867	7.14783	8.81585e-13	2.1289e-11	2.03813	up
ENSG00000202343		3.99623	4.23277	1.9169	2.20813	0.0272354	0.0835865	2.03781	-
ENSG00000146263	MMS22L	792.76	2.10138	0.325323	6.45936	1.05149e-10	1.9196e-09	2.03456	up
ENSG00000203326	ZNF525	94.9251	2.24827	0.587416	3.8274	0.000129506	0.00081022	2.03332	up
ENSG00000119729	RHOQ	312.372	2.12214	0.378443	5.60754	2.05224e-08	2.64894e-07	2.03204	up
ENSG00000246366	LACTB2-AS1	3.69742	4.49303	2.27789	1.97245	0.0485581	0.132947	2.03099	-
ENSG00000153339	TRAPPC8	173.825	2.11512	0.367126	5.76131	8.3465e-09	1.14915e-07	2.02827	up
ENSG00000286214	COPG2IT1	22.5529	2.39052	0.848019	2.81895	0.00481816	0.0196109	2.02747	up
ENSG00000163006	CCDC138	366.356	2.10052	0.33934	6.19001	6.0159e-10	9.92273e-09	2.02744	up
ENSG00000049618	ARID1B	547.229	2.07763	0.279142	7.4429	9.84954e-14	2.66772e-12	2.02673	up
ENSG00000198780	FAM169A	50.0167	2.48653	0.842509	2.95134	0.00316402	0.0136488	2.02664	up
ENSG00000143195	ILDR2	131.254	2.14069	0.415622	5.15057	2.59693e-07	2.77557e-06	2.02645	up
ENSG00000260400		104.796	2.23957	0.580139	3.86039	0.000113205	0.00072144	2.02593	up
ENSG00000183569	SERHL2	64.3657	2.67278	1.15029	2.32357	0.0201485	0.0652933	2.02527	-
ENSG00000157181	ODR4	271.049	2.12468	0.403244	5.26897	1.37195e-07	1.53327e-06	2.02494	up
ENSG00000272010		7.69021	3.8971	1.86214	2.0928	0.0363667	0.105601	2.02408	-
ENSG00000171791	BCL2	54.6383	2.17442	0.510592	4.25863	2.05684e-05	0.000153825	2.02373	up
ENSG00000074657	ZNF532	222.389	2.27876	0.715276	3.18585	0.00144329	0.0069527	2.02324	up
ENSG00000116127	ALMS1	376.063	2.16055	0.46614	4.63499	3.56963e-06	3.13287e-05	2.02281	up
ENSG00000115760	BIRC6	387.648	2.12653	0.403133	5.27501	1.32746e-07	1.48691e-06	2.02158	up
ENSG00000181827	RFX7	147.809	2.09459	0.336917	6.21694	5.06955e-10	8.48177e-09	2.02136	up
ENSG00000213371	NAP1L1P3	14.8516	2.30842	0.717622	3.21677	0.00129644	0.0063153	2.02006	up
ENSG00000169994	MYO7B	37.8855	7.12115	3.01899	2.35879			2.01996	-
ENSG00000135541	AHI1	244.288	2.07453	0.29954	6.92572	4.33775e-12	9.59823e-11	2.01796	up
ENSG00000214425	LRRC37A4P	35.9444	2.88353	1.19077	2.42158	0.0154533	0.0524168	2.01706	-
ENSG00000178568	ERBB4	28.2987	2.42757	0.808808	3.00142	0.00268725	0.0118658	2.01648	up
ENSG00000225675	LRP8-DT	7.99412	5.98361	2.1889	2.73362	0.00626432	0.0245642	2.01564	up
ENSG00000145375	SPATA5	191.073	2.15983	0.481878	4.48211	7.39095e-06	6.12084e-05	2.01536	up
ENSG00000213885	RPL13AP7	90.1248	2.19949	0.522993	4.20559	2.60397e-05	0.000190573	2.01413	up
ENSG00000270909		13.196	2.76261	1.0684	2.58575	0.00971662	0.0356546	2.01307	up
ENSG00000039650	PNKP	506.29	2.07891	0.320657	6.48328	8.97486e-11	1.65522e-09	2.01273	up
ENSG00000147874	HAUS6	509.804	2.05659	0.266269	7.72373	1.12973e-14	3.4888e-13	2.01202	up
ENSG00000127980	PEX1	185.052	2.12961	0.431673	4.93338	8.08204e-07	7.82777e-06	2.01043	up
ENSG00000114302	PRKAR2A	1853.25	2.0736	0.315567	6.57103	4.99673e-11	9.55306e-10	2.00982	up
ENSG00000169891	REPS2	40.1825	2.38004	0.70688	3.36697	0.000759999	0.00394134	2.00975	up
ENSG00000176853	FAM91A1	210.904	2.04886	0.255387	8.02258	1.0355e-15	3.60171e-14	2.0087	up
ENSG00000112144	CILK1	364.489	2.0756	0.327555	6.33666	2.34802e-10	4.08708e-09	2.00837	up
ENSG00000281131	SCHLAP1	148.413	2.0803	0.403079	5.16103	2.45596e-07	2.63484e-06	2.00736	up
ENSG00000083857	FAT1	257.995	2.06272	0.291819	7.06848	1.56636e-12	3.6926e-11	2.0067	up
ENSG00000228451	SDAD1P1	63.0276	2.51208	0.90856	2.76491	0.0056939	0.0226046	2.0066	up
ENSG00000261156	LINC01989	13.4421	2.90185	1.1482	2.52731	0.0114941	0.0410227	2.00459	up
ENSG00000273247	RAB33B-AS1	280.465	2.22787	0.613851	3.62933	0.000284159	0.00164777	2.00457	up
ENSG00000139324	TMTC3	320.95	2.14743	0.474644	4.52429	6.05991e-06	5.09516e-05	2.00419	up
ENSG00000169554	ZEB2	116.895	2.09427	0.382469	5.47567	4.35854e-08	5.3374e-07	2.00286	up
ENSG00000228623	ZNF883	171.559	2.39363	0.831994	2.87698	0.00401506	0.0167903	2.00271	up
ENSG00000078018	MAP2	36.9166	2.35784	0.783918	3.00776	0.00263178	0.011652	2.00245	up
ENSG00000227355		99.0521	2.44275	0.913483	2.67411	0.00749283	0.0286009	2.00182	up
ENSG00000160584	SIK3	101.694	2.1466	0.487857	4.40005	1.08225e-05	8.64841e-05	2.00073	up
ENSG00000186918	ZNF395	218.139	2.1316	0.445198	4.78798	1.68466e-06	1.56441e-05	2.00045	up
ENSG00000185129	PURA	450.155	2.09772	0.39407	5.3232	1.01956e-07	1.16171e-06	1.99961	up
ENSG00000102053	ZC3H12B	26.9568	2.52928	0.890209	2.84122	0.00449418	0.0184743	1.99914	up
ENSG00000186854	TRABD2A	760.043	2.07346	0.345459	6.00206	1.94832e-09	2.94192e-08	1.99898	up
ENSG00000079387	SENP1	161.429	2.0784	0.359079	5.78814	7.11684e-09	9.9086e-08	1.99598	up
ENSG00000147246	HTR2C	25.1388	2.94119	1.19737	2.45638	0.0140345	0.0485175	1.99567	up
ENSG00000273226		12.5691	2.39721	0.967425	2.47793	0.0132147	0.0461095	1.99556	up
ENSG00000156650	KAT6B	278.547	2.06613	0.334568	6.17551	6.59492e-10	1.07576e-08	1.99497	up
ENSG00000162636	FAM102B	162.044	2.23575	0.629456	3.55187	0.0003825	0.00214829	1.99463	up
ENSG00000111145	ELK3	128.689	2.17496	0.539013	4.03508	5.45837e-05	0.000373938	1.99385	up
ENSG00000259820	MIR30DHG	17.0988	4.37016	1.90534	2.29364	0.0218113	0.0697581	1.99372	-
ENSG00000253352	TUG1	610.601	2.04383	0.283305	7.21426	5.42292e-13	1.33559e-11	1.99358	up
ENSG00000129317	PUS7L	257.802	2.05118	0.310093	6.61471	3.72269e-11	7.2006e-10	1.99212	up
ENSG00000111371	SLC38A1	1854.76	2.02311	0.223696	9.044	1.51047e-19	8.11559e-18	1.99168	up
ENSG00000183530	PRR14L	514.419	2.07461	0.364927	5.68499	1.30821e-08	1.74539e-07	1.99019	up
ENSG00000178295	GEN1	155.277	2.08025	0.388491	5.35469	8.57025e-08	9.91329e-07	1.98865	up
ENSG00000174738	NR1D2	255.868	2.08087	0.382527	5.4398	5.33409e-08	6.40543e-07	1.98755	up
ENSG00000112249	ASCC3	371.137	2.10054	0.430453	4.87985	1.06169e-06	1.011e-05	1.98571	up
ENSG00000123094	RASSF8	91.8969	2.16227	0.534497	4.04543	5.22279e-05	0.000360039	1.98492	up
ENSG00000121621	KIF18A	349.768	2.02876	0.266691	7.60715	2.80198e-14	8.22992e-13	1.98481	up
ENSG00000108256	NUFIP2	354.398	2.09266	0.416424	5.02532	5.02604e-07	5.06333e-06	1.98294	up
ENSG00000165392	WRN	183.743	2.07578	0.381459	5.4417	5.27759e-08	6.34143e-07	1.98266	up
ENSG00000170088	TMEM192	611.137	2.05584	0.344261	5.97175	2.34728e-09	3.5096e-08	1.98212	up
ENSG00000152402	GUCY1A2	11.7679	2.76555	1.2158	2.27468	0.0229251	0.0727686	1.98026	-
ENSG00000134874	DZIP1	518.965	2.06262	0.366874	5.62215	1.88598e-08	2.4503e-07	1.97972	up
ENSG00000175820	CCDC168	3.32516	3.59901	2.16911	1.65921	0.0970734	0.228925	1.97942	-
ENSG00000147421	HMBOX1	157.851	2.05424	0.345498	5.94574	2.75203e-09	4.07786e-08	1.97919	up
ENSG00000279377		4.1556	5.6601	2.59471	2.1814	0.0291539	0.0882734	1.97908	-
ENSG00000149084	HSD17B12	865.744	2.03088	0.290966	6.9798	2.95599e-12	6.68249e-11	1.97867	up
ENSG00000075539	FRYL	195.905	2.06484	0.364453	5.6656	1.46511e-08	1.94037e-07	1.97712	up
ENSG00000252835	SCARNA21	7.33513	3.60636	1.67529	2.15267	0.0313442	0.0934483	1.9769	-
ENSG00000152270	PDE3B	84.5559	2.09755	0.448503	4.67678	2.91414e-06	2.60251e-05	1.97554	up
ENSG00000187140	FOXD3	35.2718	2.20893	0.575233	3.84007	0.000122998	0.000775626	1.97477	up
ENSG00000257511		128.503	2.07917	0.424303	4.90021	9.57364e-07	9.18273e-06	1.97338	up
ENSG00000166033	HTRA1	75.892	2.23821	0.580897	3.85303	0.000116665	0.000741348	1.97234	up
ENSG00000118873	RAB3GAP2	527.575	2.01896	0.277597	7.27299	3.51611e-13	8.89163e-12	1.97181	up
ENSG00000119950	MXI1	756.255	2.0221	0.286843	7.0495	1.7956e-12	4.17976e-11	1.9716	up
ENSG00000254759	NAP1L1P1	37.7177	2.17969	0.622241	3.50297	0.000460096	0.00252823	1.97147	up
ENSG00000268043	NBPF12	8.19424	2.63721	1.09937	2.39883	0.0164475	0.0551942	1.96833	-
ENSG00000109794	FAM149A	95.1901	2.2002	0.572035	3.84626	0.000119934	0.000757989	1.96737	up
ENSG00000289318		10.7683	2.57077	1.11436	2.30696	0.0210571	0.0677286	1.96732	-
ENSG00000042317	SPATA7	133.053	2.10142	0.470171	4.46948	7.84089e-06	6.45036e-05	1.96724	up
ENSG00000197579	TOPORS	357.99	2.0444	0.354243	5.77118	7.87188e-09	1.08758e-07	1.96628	up
ENSG00000014123	UFL1	565.892	2.02526	0.311625	6.49901	8.08509e-11	1.50371e-09	1.96494	up
ENSG00000189057	FAM111B	253.779	2.19601	0.619818	3.54299	0.000395615	0.00221254	1.96471	up
ENSG00000261167		33.3381	2.55898	0.976337	2.621			1.9643	-
ENSG00000257497	GLIPR1-AS1	10.7484	2.33151	0.965739	2.41423	0.0157686	0.0532407	1.96424	-
ENSG00000206560	ANKRD28	276.069	2.02035	0.29839	6.77081	1.28059e-11	2.64469e-10	1.9637	up
ENSG00000150893	FREM2	144.668	2.19426	0.602557	3.64158	0.000270973	0.00157823	1.95893	up
ENSG00000163510	CWC22	460.067	2.01189	0.293803	6.84775	7.50194e-12	1.60967e-10	1.95878	up
ENSG00000198677	TTC37	744.656	2.03306	0.348994	5.82549	5.69448e-09	8.01838e-08	1.95809	up
ENSG00000196646	ZNF136	70.0338	2.37302	0.825229	2.87559	0.00403268	0.0168548	1.95724	up
ENSG00000260711		10.7608	2.84824	1.46774	1.94056	0.0523117	0.140991	1.95649	-
ENSG00000163728	TTC14	121.776	2.20448	0.642801	3.42948	0.000604738	0.00321263	1.95591	up
ENSG00000149948	HMGA2	925.179	2.02812	0.348328	5.82245	5.7992e-09	8.14271e-08	1.95446	up
ENSG00000156140	ADAMTS3	104.54	2.11003	0.504631	4.18133	2.89805e-05	0.000209773	1.95446	up
ENSG00000091039	OSBPL8	495.525	2.0272	0.344005	5.89293	3.79412e-09	5.48667e-08	1.95405	up
ENSG00000133640	LRRIQ1	116.802	2.05654	0.420557	4.89004	1.00814e-06	9.63415e-06	1.95304	up
ENSG00000182150	ERCC6L2	244.814	2.10508	0.499351	4.21563	2.49085e-05	0.000182832	1.95298	up
ENSG00000169306	IL1RAPL1	7.03889	2.85164	1.26878	2.24754	0.0246054	0.0771391	1.95095	-
ENSG00000113658	SMAD5	462.052	1.99492	0.26817	7.43901	1.01443e-13	2.73635e-12	1.95047	up
ENSG00000182263	FIGN	198.462	2.12851	0.544002	3.91269	9.12724e-05	0.000596233	1.95029	up
ENSG00000080298	RFX3	112.826	2.09413	0.489503	4.27807	1.88519e-05	0.000142221	1.94911	up
ENSG00000154380	ENAH	2261.65	1.97628	0.212568	9.29716	1.44242e-20	8.7992e-19	1.94841	up
ENSG00000269421		3.4856	4.13167	2.11198	1.9563	0.0504294	0.136845	1.94815	-
ENSG00000163249	CCNYL1	131.2	2.18992	0.634779	3.4499	0.000560795	0.00300658	1.94815	up
ENSG00000236035	NSA2P1	2.51947	4.31138	1.95749	2.2025	0.02763		1.94768	-
ENSG00000254635	WAC-AS1	272.126	2.04202	0.394167	5.18061	2.21163e-07	2.39213e-06	1.94742	up
ENSG00000261239	ANKRD26P1	90.7621	2.9462	1.54325	1.90908	0.0562518	0.149377	1.94494	-
ENSG00000196335	STK31	34.2938	2.55089	0.902538	2.82636	0.00470809	0.0192221	1.94482	up
ENSG00000122779	TRIM24	995.723	1.96746	0.194086	10.1371	3.78316e-24	3.30418e-22	1.94435	up
ENSG00000257242	LINC01619	2.92343	4.00598	2.10438	1.90364	0.0569569	0.150745	1.94427	-
ENSG00000135378	PRRG4	42.7176	2.41872	0.850081	2.84528	0.0044372	0.0182932	1.94401	up
ENSG00000269964	MEI4	4.10782	3.02614	1.62242	1.8652	0.0621533	0.161713	1.94303	-
ENSG00000138185	ENTPD1	117.861	2.1411	0.592638	3.61282	0.00030288	0.0017451	1.94254	up
ENSG00000164346	NSA2	4191.64	1.99171	0.285777	6.96945	3.18181e-12	7.13156e-11	1.94187	up
ENSG00000104067	TJP1	289.468	1.99662	0.297645	6.70807	1.97213e-11	3.97351e-10	1.94164	up
ENSG00000283312		5.44882	3.40011	1.79456	1.89467	0.0581356	0.15321	1.94091	-
ENSG00000226933	NRBF2P2	9.21716	2.26964	0.931601	2.43628	0.0148392	0.0507856	1.93991	-
ENSG00000198682	PAPSS2	165.031	2.09292	0.503264	4.15869	3.20081e-05	0.000230092	1.93989	up
ENSG00000077097	TOP2B	1512.57	1.97299	0.230783	8.5491	1.24051e-17	5.5021e-16	1.93989	up
ENSG00000197044	ZNF441	87.702	2.12733	0.554624	3.83562	0.000125245	0.000788792	1.93875	up
ENSG00000011454	RABGAP1	163.819	2.01382	0.347941	5.78782	7.13042e-09	9.91358e-08	1.93874	up
ENSG00000196323	ZBTB44	530.012	2.00047	0.322653	6.20007	5.64369e-10	9.33189e-09	1.93693	up
ENSG00000114857	NKTR	351.373	1.98767	0.294388	6.75188	1.45938e-11	2.99614e-10	1.9364	up
ENSG00000258732		83.8719	2.33701	0.825752	2.83016	0.00465248	0.0190264	1.93552	up
ENSG00000250068		2.51244	4.77616	2.41495	1.97775	0.0479573		1.93418	-
ENSG00000087095	NLK	204.53	2.20642	0.667144	3.30727	0.000942111	0.00476974	1.93382	up
ENSG00000008086	CDKL5	66.5159	2.12006	0.552218	3.83917	0.000123453	0.000777999	1.93072	up
ENSG00000196418	ZNF124	291.795	1.99543	0.33323	5.98814	2.1225e-09	3.18794e-08	1.93043	up
ENSG00000254837	LIPT2-AS1	14.9399	3.02041	1.38992	2.17307	0.0297749	0.0896731	1.93018	-
ENSG00000166164	BRD7	1078.96	1.96077	0.226675	8.65012	5.14453e-18	2.38307e-16	1.92955	up
ENSG00000122257	RBBP6	1071.14	1.95935	0.228262	8.58379	9.17974e-18	4.13631e-16	1.92804	up
ENSG00000156802	ATAD2	823.43	1.97832	0.286663	6.90119	5.157e-12	1.12355e-10	1.92745	up
ENSG00000198887	SMC5	295.942	1.9582	0.230023	8.51306	1.69397e-17	7.2537e-16	1.92657	up
ENSG00000260418		7.90327	2.39294	1.10478	2.16599	0.0303118	0.0910547	1.9258	-
ENSG00000078747	ITCH	197.289	1.99794	0.345189	5.78796	7.12452e-09	9.91234e-08	1.92522	up
ENSG00000148516	ZEB1	211.602	2.00339	0.356652	5.6172	1.94079e-08	2.51491e-07	1.92502	up
ENSG00000136770	DNAJC1	770.085	1.95573	0.224338	8.71775	2.83784e-18	1.35901e-16	1.925	up
ENSG00000177363	LRRN4CL	2.91017	5.12016	2.5888	1.97781	0.04795	0.131597	1.92441	-
ENSG00000272990		3.11844	3.39263	2.05483	1.65105	0.0987286	0.231809	1.92339	-
ENSG00000123106	CCDC91	303.851	1.97959	0.307249	6.44296	1.17168e-10	2.12533e-09	1.92319	up
ENSG00000229358	DPY19L1P1	30.9907	2.77918	1.1942	2.32722	0.0199535	0.0647461	1.923	-
ENSG00000112414	ADGRG6	99.4353	1.99302	0.34275	5.8148	6.07071e-09	8.50977e-08	1.92273	up
ENSG00000112159	MDN1	356.996	1.97713	0.299227	6.60745	3.90984e-11	7.55521e-10	1.92085	up
ENSG00000150938	CRIM1	176.705	2.00154	0.356239	5.61853	1.92593e-08	2.49892e-07	1.91993	up
ENSG00000222030	LINC01793	9.49544	2.45134	1.01888	2.40592	0.0161319	0.0542914	1.91946	-
ENSG00000163939	PBRM1	449.414	1.95285	0.232721	8.39138	4.80459e-17	1.94004e-15	1.91946	up
ENSG00000276672		31.3983	2.6403	1.18678	2.22475	0.026098	0.0808213	1.9166	-
ENSG00000139218	SCAF11	1080.31	1.9384	0.19532	9.92423	3.26618e-23	2.54942e-21	1.91532	up
ENSG00000138767	CNOT6L	248.769	1.97597	0.313797	6.29698	3.03502e-10	5.24149e-09	1.9151	up
ENSG00000112851	ERBIN	378.103	1.94632	0.232046	8.38765	4.95975e-17	1.99862e-15	1.9141	up
ENSG00000165434	PGM2L1	208.619	1.98993	0.353575	5.62804	1.82267e-08	2.38052e-07	1.91326	up
ENSG00000119285	HEATR1	242.536	2.00484	0.39385	5.09036	3.57385e-07	3.73315e-06	1.91281	up
ENSG00000110693	SOX6	107.265	2.07399	0.510744	4.06073	4.89185e-05	0.000339349	1.91258	up
ENSG00000249395	CASC9	804.125	1.98596	0.353457	5.61867	1.9243e-08	2.49844e-07	1.91173	up
ENSG00000185634	SHC4	15.7479	2.49226	1.14515	2.17637	0.0295274	0.0890764	1.9114	-
ENSG00000278879		2.46391	4.73941	2.4247	1.95464	0.0506256		1.90933	-
ENSG00000213468	FIRRE	201.46	1.97313	0.332316	5.93752	2.89373e-09	4.27505e-08	1.90901	up
ENSG00000124789	NUP153	307.686	2.01002	0.404559	4.96841	6.75033e-07	6.62535e-06	1.90883	up
ENSG00000107771	CCSER2	195.954	2.02006	0.441816	4.57217	4.82701e-06	4.13571e-05	1.90543	up
ENSG00000234241		3.21236	3.67195	1.72387	2.13007	0.0331659	0.0978784	1.905	-
ENSG00000082805	ERC1	257.474	1.98661	0.366338	5.42288	5.86454e-08	6.9958e-07	1.90448	up
ENSG00000229832		3.42736	4.45376	2.47794	1.79736	0.0722783	0.18199	1.90314	-
ENSG00000239556	UPK3BL3P	3.74365	5.20027	2.37858	2.18629	0.0287945	0.0874108	1.90182	-
ENSG00000251364	SYT9-AS1	8.97995	2.53821	1.16327	2.18196	0.0291124	0.0881732	1.90101	-
ENSG00000156273	BACH1	178.833	2.12657	0.615157	3.45696	0.000546306	0.00293525	1.9009	up
ENSG00000139800	ZIC5	67.024	2.07778	0.533521	3.89446	9.84173e-05	0.00063828	1.90067	up
ENSG00000152484	USP12	129.292	1.9668	0.34133	5.76217	8.30368e-09	1.14405e-07	1.89948	up
ENSG00000134709	HOOK1	138.437	2.1204	0.616077	3.44177	0.000577914	0.0030875	1.89907	up
ENSG00000261542		8.75363	2.66759	1.27751	2.08813	0.0367865	0.106596	1.89794	-
ENSG00000223575	RBMX2P3	3.02667	3.28008	1.80026	1.822	0.0684549	0.174737	1.89759	-
ENSG00000130856	ZNF236	69.3539	2.20913	0.741921	2.97758	0.00290536	0.0126932	1.89667	up
ENSG00000028277	POU2F2	138.476	2.27001	0.819049	2.77152	0.00557948	0.0222126	1.89651	up
ENSG00000135968	GCC2	412.127	1.9356	0.2587	7.482	7.31993e-14	2.01843e-12	1.89616	up
ENSG00000262185	LINC02861	4.43336	3.44685	1.8192	1.8947	0.058132	0.15321	1.89601	-
ENSG00000186479	RGS7BP	7.67305	2.32993	1.04991	2.21917	0.0264751	0.0817723	1.89594	-
ENSG00000113494	PRLR	17.3077	2.62011	1.23743	2.11738	0.0342273	0.100562	1.89568	-
ENSG00000048828	FAM120A	485.063	1.9357	0.257426	7.51946	5.50046e-14	1.54029e-12	1.89563	up
ENSG00000213949	ITGA1	27.4841	2.53834	1.01661	2.49687	0.0125296	0.0441205	1.89439	up
ENSG00000188158	NHS	154.352	1.97842	0.363395	5.44425	5.20238e-08	6.26456e-07	1.8942	up
ENSG00000186522	SEPTIN10	493.024	1.94603	0.295799	6.57889	4.7396e-11	9.08289e-10	1.89395	up
ENSG00000283010		3.60875	5.06389	2.22929	2.27152	0.0231155	0.0732351	1.89246	-
ENSG00000186814	ZSCAN30	99.3424	2.00182	0.435928	4.59209	4.38826e-06	3.78104e-05	1.89029	up
ENSG00000264151		10.8938	4.36416	1.93015	2.26105	0.0237563	0.0749392	1.88928	-
ENSG00000286758		2.53584	4.88246	2.54697	1.91697	0.0552417		1.88838	-
ENSG00000178966	RMI1	310.116	1.92702	0.256609	7.50957	5.93239e-14	1.65423e-12	1.88816	up
ENSG00000051341	POLQ	165.876	2.00367	0.450538	4.44729	8.69602e-06	7.0862e-05	1.88754	up
ENSG00000198590	APRG1	6.61281	4.37776	1.90843	2.29391	0.0217954	0.0697186	1.88711	-
ENSG00000155313	USP25	184.67	1.92947	0.279798	6.89595	5.35064e-12	1.1619e-10	1.88508	up
ENSG00000139318	DUSP6	24.5863	2.62372	1.17142	2.23977	0.0251056	0.0783107	1.88474	-
ENSG00000087470	DNM1L	1157.23	1.91198	0.214999	8.89297	5.94944e-19	3.03223e-17	1.88461	up
ENSG00000215086	NPM1P24	28.0206	2.24623	0.805439	2.78883	0.00528988	0.021213	1.88444	up
ENSG00000196911	KPNA5	130.445	2.11699	0.633737	3.34048			1.88407	-
ENSG00000164134	NAA15	1068.4	1.91484	0.22942	8.34641	7.03713e-17	2.79036e-15	1.88371	up
ENSG00000232593	KANTR	117.577	2.02712	0.504086	4.02137	5.78598e-05	0.000394881	1.88333	up
ENSG00000082701	GSK3B	222.585	1.94657	0.327807	5.93815	2.8826e-09	4.26178e-08	1.8827	up
ENSG00000137710	RDX	1898.25	1.90399	0.198004	9.61594	6.84815e-22	4.74725e-20	1.88067	up
ENSG00000151422	FER	119.425	2.08747	0.595541	3.50517	0.000456319	0.00251096	1.88061	up
ENSG00000168172	HOOK3	583.648	1.95825	0.361267	5.4205	5.94336e-08	7.07281e-07	1.88046	up
ENSG00000227056	RPL6P2	2.41877	3.85802	2.14115	1.80184	0.0715699		1.8804	-
ENSG00000151572	ANO4	54.2768	2.17567	0.702462	3.09721	0.00195351	0.00903226	1.87904	up
ENSG00000261115	TMEM178B	69.143	2.04457	0.525771	3.88871	0.000100779	0.000651675	1.87789	up
ENSG00000266074	BAHCC1	381.033	1.95272	0.349212	5.59178	2.24751e-08	2.88036e-07	1.87737	up
ENSG00000104320	NBN	477.23	1.90193	0.207349	9.1726	4.61765e-20	2.64594e-18	1.87719	up
ENSG00000160218	TRAPPC10	46.3928	2.09565	0.587505	3.56704	0.000361042	0.00203965	1.87716	up
ENSG00000128641	MYO1B	309.933	1.95567	0.365044	5.35735	8.4451e-08	9.77422e-07	1.8752	up
ENSG00000166012	TAF1D	2967.13	1.93064	0.306319	6.30271	2.9249e-10	5.06012e-09	1.8751	up
ENSG00000137460	FHDC1	20.6356	2.42228	1.02703	2.35853	0.0183475	0.0603046	1.8747	-
ENSG00000267127		2.78873	5.12103	2.70256	1.89488	0.058108		1.87406	-
ENSG00000044459	CNTLN	1052.66	1.90213	0.220639	8.62103	6.6352e-18	3.03809e-16	1.87346	up
ENSG00000165240	ATP7A	84.1207	2.15453	0.686832	3.13692	0.00170734	0.00804414	1.87344	up
ENSG00000143971	ETAA1	235.708	1.92234	0.296055	6.49318	8.40459e-11	1.55583e-09	1.87135	up
ENSG00000175087	PDIK1L	120.698	2.03116	0.523941	3.87669	0.000105888	0.000681814	1.8702	up
ENSG00000135090	TAOK3	391.717	1.91755	0.280761	6.82985	8.50036e-12	1.81213e-10	1.86899	up
ENSG00000184260	H2AC20	773.498	1.96217	0.403534	4.86247	1.1593e-06	1.09762e-05	1.86837	up
ENSG00000050030	NEXMIF	9.21253	2.70249	1.2224	2.21081	0.0270493	0.0831312	1.86818	-
ENSG00000154928	EPHB1	219.096	1.94784	0.362989	5.36611	8.04548e-08	9.33897e-07	1.86633	up
ENSG00000072415	PALS1	218.253	1.9902	0.461131	4.3159	1.58953e-05	0.000122194	1.86595	up
ENSG00000164684	ZNF704	128.532	1.94009	0.35123	5.52372	3.31904e-08	4.13211e-07	1.86578	up
ENSG00000178105	DDX10	788.131	1.91713	0.294608	6.50738	7.64717e-11	1.42493e-09	1.86553	up
ENSG00000189195	BTBD8	22.2251	2.54537	1.09846	2.31722	0.0204916	0.0661888	1.86493	-
ENSG00000061455	PRDM6	34.3759	2.17646	0.724855	3.00261	0.00267672	0.0118246	1.86491	up
ENSG00000289811	FAM95A	80.5932	2.00327	0.461076	4.34478	1.39417e-05	0.000108694	1.86344	up
ENSG00000104447	TRPS1	301.342	1.94501	0.369544	5.26328	1.4151e-07	1.58061e-06	1.86326	up
ENSG00000138829	FBN2	593.301	1.9243	0.317304	6.06452	1.32351e-09	2.04042e-08	1.86281	up
ENSG00000182923	CEP63	106.928	1.94387	0.380887	5.10352	3.33385e-07	3.49719e-06	1.86214	up
ENSG00000113163	CERT1	327.94	1.90068	0.259353	7.32855	2.32651e-13	6.00591e-12	1.86081	up
ENSG00000187187	ZNF546	30.1812	2.31236	0.953236	2.4258	0.0152747	0.0519443	1.86071	-
ENSG00000116962	NID1	324.93	1.91104	0.291555	6.55463	5.57788e-11	1.0613e-09	1.86068	up
ENSG00000143970	ASXL2	181.859	1.90845	0.28448	6.70855	1.96566e-11	3.96452e-10	1.86058	up
ENSG00000267655		65.2205	2.34085	0.956744	2.44668	0.0144179	0.049618	1.86011	up
ENSG00000278177		6.70314	3.63334	1.52799	2.37786	0.0174134	0.0578481	1.85978	-
ENSG00000230453	ANKRD18B	171.734	1.94449	0.384457	5.05775	4.24231e-07	4.36925e-06	1.85879	up
ENSG00000129292	PHF20L1	312.747	1.90283	0.273794	6.94986	3.65643e-12	8.12696e-11	1.85873	up
ENSG00000232811		5.46236	3.98707	2.03797	1.95639	0.0504187	0.136845	1.85861	-
ENSG00000109762	SNX25	104.864	2.14418	0.705712	3.03832	0.00237899	0.0107025	1.85812	up
ENSG00000171951	SCG2	5.42237	4.33598	2.4522	1.7682	0.0770275	0.191516	1.85807	-
ENSG00000102531	FNDC3A	294.574	1.97765	0.454504	4.35122	1.3538e-05	0.000105879	1.85803	up
ENSG00000269821	KCNQ1OT1	94.1117	1.97423	0.464708	4.24833	2.15366e-05	0.00016034	1.85712	up
ENSG00000215861		5.30952	3.16928	1.80823	1.7527	0.0796542	0.196617	1.85628	-
ENSG00000164164	OTUD4	160.337	1.98593	0.467242	4.25033	2.13458e-05	0.000159158	1.85589	up
ENSG00000134987	WDR36	282.201	1.89288	0.250936	7.54329	4.58267e-14	1.30353e-12	1.85589	up
ENSG00000138674	SEC31A	932.507	1.87563	0.184334	10.1752	2.55864e-24	2.28502e-22	1.85567	up
ENSG00000169118	CSNK1G1	346.494	1.95389	0.407631	4.79329	1.64071e-06	1.52717e-05	1.85508	up
ENSG00000258806	OR11H7	4.67431	3.04237	1.93567	1.57175	0.11601	0.261186	1.8542	-
ENSG00000157212	PAXIP1	235.548	1.94442	0.388238	5.00833	5.49054e-07	5.48944e-06	1.85405	up
ENSG00000153113	CAST	1447.55	1.96217	0.435658	4.50393	6.67071e-06	5.57561e-05	1.85297	up
ENSG00000066654	THUMPD1	498.622	1.89423	0.26947	7.02948	2.07311e-12	4.77844e-11	1.85254	up
ENSG00000051825	MPHOSPH9	373.924	1.9146	0.328319	5.83152	5.49246e-09	7.75594e-08	1.85238	up
ENSG00000119707	RBM25	1303.71	1.88534	0.239606	7.8685	3.58917e-15	1.17424e-13	1.85137	up
ENSG00000139117	CPNE8	68.1002	2.06883	0.610687	3.38771	0.000704792	0.00368783	1.85078	up
ENSG00000198301	SDAD1	1073.49	1.87844	0.22305	8.42161	3.71353e-17	1.52116e-15	1.84952	up
ENSG00000106443	PHF14	1107.69	1.87198	0.197912	9.45864	3.11969e-21	2.02128e-19	1.84884	up
ENSG00000120137	PANK3	377.378	1.93422	0.384021	5.03676	4.73477e-07	4.81146e-06	1.84873	up
ENSG00000116984	MTR	543.726	1.94653	0.410491	4.74195	2.11668e-06	1.93121e-05	1.84855	up
ENSG00000272335		37.6338	2.6271	1.21528	2.16172	0.0306396	0.0917893	1.84713	-
ENSG00000158528	PPP1R9A	169.927	1.93198	0.38209	5.05634	4.27382e-07	4.39485e-06	1.84694	up
ENSG00000066422	ZBTB11	102.368	1.92556	0.36763	5.23778	1.62523e-07	1.8001e-06	1.84638	up
ENSG00000140534	TICRR	169.441	1.90381	0.313118	6.08014	1.20075e-09	1.8686e-08	1.84571	up
ENSG00000116514	RNF19B	84.8319	1.99841	0.496974	4.02115	5.79151e-05	0.000395122	1.84536	up
ENSG00000127928	GNGT1	176.979	2.08555	0.674858	3.09035	0.00199922	0.00920497	1.84481	up
ENSG00000153317	ASAP1	328.708	1.87334	0.229446	8.16462	3.22449e-16	1.19941e-14	1.84355	up
ENSG00000285813		5.7786	2.54697	1.38706	1.83623	0.0663233	0.170261	1.84294	-
ENSG00000272886	DCP1A	526.686	1.89323	0.296243	6.3908	1.6502e-10	2.93161e-09	1.84271	up
ENSG00000147862	NFIB	279.647	1.95211	0.436401	4.47321	7.70548e-06	6.35478e-05	1.84252	up
ENSG00000101350	KIF3B	430.15	1.95412	0.442115	4.41993	9.87318e-06	7.95068e-05	1.8424	up
ENSG00000154305	MIA3	451.914	1.90769	0.336734	5.66528	1.46785e-08	1.9427e-07	1.84198	up
ENSG00000099139	PCSK5	81.3954	2.08324	0.640643	3.2518	0.00114677	0.00567405	1.84171	up
ENSG00000152457	DCLRE1C	415.23	1.91201	0.350632	5.45305	4.95121e-08	5.9965e-07	1.8417	up
ENSG00000119138	KLF9	140.407	1.92967	0.381955	5.05208	4.37026e-07	4.48937e-06	1.84062	up
ENSG00000168152	THAP9	101.818	2.1331	0.71994	2.96289	0.00304766	0.0132187	1.84022	up
ENSG00000065243	PKN2	524.29	1.87078	0.243447	7.68455	1.53533e-14	4.65435e-13	1.83638	up
ENSG00000275342	PRAG1	64.7634	2.10233	0.663453	3.16877	0.00153088	0.00731708	1.83621	up
ENSG00000169964	TMEM42	3.72959	2.95446	1.7164	1.72132	0.0851935	0.207016	1.83577	-
ENSG00000186812	ZNF397	372.287	1.9048	0.355242	5.36198	8.23144e-08	9.53251e-07	1.83321	up
ENSG00000178202	POGLUT3	383.264	1.87149	0.259362	7.21577	5.36299e-13	1.32247e-11	1.83292	up
ENSG00000227087	RBMX2P5	3.15248	3.16154	1.77064	1.78553	0.0741752	0.185588	1.83167	-
ENSG00000270816	LINC00221	431.511	1.90204	0.352593	5.39444	6.87369e-08	8.07811e-07	1.83161	up
ENSG00000185565	LSAMP	26.1044	2.15924	0.777326	2.77778	0.0054732	0.0218597	1.83141	up
ENSG00000245680	ZNF585B	41.9293	2.43659	1.03684	2.35	0.0187732	0.0614972	1.83013	-
ENSG00000130779	CLIP1	263.517	1.92067	0.388738	4.94078	7.78095e-07	7.55831e-06	1.8294	up
ENSG00000104093	DMXL2	250.185	1.90303	0.348163	5.46593	4.6048e-08	5.61815e-07	1.829	up
ENSG00000164236	ANKRD33B	62.7285	2.04417	0.592999	3.44718	0.000566465	0.00303288	1.82885	up
ENSG00000006747	SCIN	23.1097	2.0909	0.743146	2.81357	0.00489941	0.0198926	1.82858	up
ENSG00000134323	MYCN	25.5318	2.62076	1.1635	2.25248	0.0242918	0.076349	1.82848	-
ENSG00000262714		1.60522	4.22474	2.30305	1.83441	0.0665932		1.82793	-
ENSG00000197566	ZNF624	28.0327	2.6649	1.21996	2.1844	0.0289326	0.087803	1.82765	-
ENSG00000154240	CEP112	62.0891	2.01232	0.560996	3.58704	0.00033445	0.00190431	1.8273	up
ENSG00000115159	GPD2	183.663	1.89656	0.336565	5.63506	1.74994e-08	2.29157e-07	1.82677	up
ENSG00000162733	DDR2	31.6592	2.20039	0.784308	2.80552	0.00502362	0.0203137	1.8248	up
ENSG00000164292	RHOBTB3	584.334	1.8726	0.289922	6.45897	1.05417e-10	1.92095e-09	1.82453	up
ENSG00000170242	USP47	343.502	1.86083	0.25227	7.37634	1.62698e-13	4.24988e-12	1.8244	up
ENSG00000006459	KDM7A	156.418	1.89584	0.346463	5.47199	4.44999e-08	5.43595e-07	1.82408	up
ENSG00000111799	COL12A1	8.28978	2.79972	1.39648	2.00484	0.0449798	0.125055	1.82344	-
ENSG00000157625	TAB3	128.901	2.05658	0.639644	3.21519	0.00130357	0.00634067	1.82303	up
ENSG00000185070	FLRT2	163.635	1.9226	0.402076	4.78167	1.73846e-06	1.6061e-05	1.82279	up
ENSG00000276855		4.6457	5.28162	2.28722	2.30919	0.0209333	0.0674286	1.82114	-
ENSG00000175029	CTBP2	797.688	1.87594	0.301102	6.23024	4.65706e-10	7.81803e-09	1.8211	up
ENSG00000269345	VN1R85P	6.98921	5.22262	2.13488	2.44633	0.0144321	0.0496471	1.82096	up
ENSG00000258169	LINC00485	3.80821	3.68497	2.30801	1.5966	0.110354	0.251712	1.82083	-
ENSG00000101331	CCM2L	11.3311	2.38152	1.01885	2.33746	0.0194153	0.0632688	1.82035	-
ENSG00000155903	RASA2	117.5	1.87003	0.302817	6.17544	6.59804e-10	1.07576e-08	1.81554	up
ENSG00000196914	ARHGEF12	358.26	1.85517	0.261917	7.08306	1.41002e-12	3.3479e-11	1.81533	up
ENSG00000117500	TMED5	784.813	1.8499	0.249165	7.42439	1.13301e-13	3.0233e-12	1.81499	up
ENSG00000169760	NLGN1	57.3133	2.09138	0.718997	2.90875	0.00362881	0.0153892	1.81184	up
ENSG00000175938	ORAI3	17.6179	2.76696	1.25843	2.19874	0.0278963	0.0851879	1.81099	-
ENSG00000074590	NUAK1	186.312	1.97303	0.52954	3.72592	0.000194601	0.00116702	1.8109	up
ENSG00000242110	AMACR	1.96326	4.30514	2.3373	1.84193	0.0654853		1.81011	-
ENSG00000165325	DEUP1	10.381	2.33806	1.11954	2.08842	0.0367602	0.106551	1.8101	-
ENSG00000141905	NFIC	786.605	1.89458	0.383026	4.94635	7.56192e-07	7.37083e-06	1.81003	up
ENSG00000163625	WDFY3	75.6555	1.95069	0.493805	3.95033	7.80431e-05	0.00051714	1.80939	up
ENSG00000068784	SRBD1	326.972	1.8563	0.288852	6.42646	1.30608e-10	2.34762e-09	1.80876	up
ENSG00000130396	AFDN	392.617	1.88567	0.360233	5.23459	1.6535e-07	1.82834e-06	1.80851	up
ENSG00000166503	HDGFL3	2257.99	1.84421	0.25117	7.34249	2.09662e-13	5.42657e-12	1.80822	up
ENSG00000223509	WHAMMP1	10.2406	2.35324	1.0712	2.19683	0.0280323	0.0855293	1.80813	-
ENSG00000250565	ATP6V1E2	213.857	1.86482	0.317873	5.86657	4.44896e-09	6.35942e-08	1.80813	up
ENSG00000184226	PCDH9	77.2421	2.08534	0.719223	2.89943	0.00373842	0.0157899	1.80708	up
ENSG00000281327	LINC01338	15.8345	2.10568	0.843344	2.49682	0.0125311	0.0441205	1.80593	up
ENSG00000136040	PLXNC1	50.4335	1.9976	0.550697	3.62741	0.000286278	0.00165861	1.80556	up
ENSG00000182111	ZNF716	13.9932	2.14627	0.871832	2.4618	0.0138242	0.0478839	1.8047	up
ENSG00000153922	CHD1	450.898	1.91266	0.434722	4.39972	1.08389e-05	8.65775e-05	1.80434	up
ENSG00000286406		12.0021	2.58376	1.30436	1.98086	0.0476068	0.13085	1.80412	-
ENSG00000096654	ZNF184	112.62	1.90618	0.418522	4.55456	5.24956e-06	4.46877e-05	1.80366	up
ENSG00000198315	ZKSCAN8	82.023	1.91272	0.444211	4.30589	1.66317e-05	0.000127608	1.80346	up
ENSG00000173145	NOC3L	622.301	1.82845	0.214026	8.54312	1.30645e-17	5.75592e-16	1.80315	up
ENSG00000136628	EPRS1	5838.34	1.83143	0.22395	8.17787	2.88915e-16	1.08486e-14	1.8028	up
ENSG00000135655	USP15	416.675	1.88578	0.3848	4.90068	9.55074e-07	9.1652e-06	1.80115	up
ENSG00000169330	MINAR1	11.0988	2.6243	1.24463	2.10849	0.0349882	0.102463	1.80112	-
ENSG00000252739	RNU7-151P	1.93767	4.49186	2.44842	1.8346	0.0665653		1.79578	-
ENSG00000197121	PGAP1	128.306	1.89017	0.403156	4.68845	2.75287e-06	2.46738e-05	1.79538	up
ENSG00000244675		4.43249	2.68851	1.43863	1.86879	0.0616517	0.160703	1.79335	-
ENSG00000168280	KIF5C	602.038	1.83313	0.269908	6.79169	1.10825e-11	2.31044e-10	1.79164	up
ENSG00000103995	CEP152	257.446	1.89793	0.429275	4.42124	9.81367e-06	7.91743e-05	1.79128	up
ENSG00000267470	ZNF571-AS1	12.971	2.0978	0.922596	2.2738	0.0229779	0.0728779	1.79037	-
ENSG00000134744	TUT4	379.256	1.83093	0.270216	6.77581	1.23708e-11	2.55749e-10	1.79027	up
ENSG00000254535	PABPC4L	91.6033	2.14538	0.774544	2.76986	0.00560799	0.0223127	1.78978	up
ENSG00000113441	LNPEP	192.147	1.88876	0.417082	4.52852	5.93981e-06	5.00054e-05	1.78971	up
ENSG00000162409	PRKAA2	221.614	1.87782	0.394618	4.75859	1.94953e-06	1.78642e-05	1.78915	up
ENSG00000055332	EIF2AK2	496.036	1.82356	0.248971	7.32438	2.4e-13	6.18758e-12	1.78884	up
ENSG00000115816	CEBPZ	1154.89	1.82429	0.251516	7.25316	4.07167e-13	1.01669e-11	1.78866	up
ENSG00000104321	TRPA1	126.589	1.88265	0.408143	4.61272	3.97433e-06	3.45896e-05	1.78856	up
ENSG00000196369	SRGAP2B	26.6275	2.35683	1.08593	2.17033	0.029982	0.0901871	1.78759	-
ENSG00000197008	ZNF138	632.221	1.87854	0.408767	4.59562	4.3147e-06	3.72738e-05	1.78733	up
ENSG00000184007	PTP4A2	1231.41	1.82421	0.259799	7.02164	2.19285e-12	5.03187e-11	1.78609	up
ENSG00000168538	TRAPPC11	227.496	1.84029	0.308585	5.96363	2.46689e-09	3.67458e-08	1.78608	up
ENSG00000114166	KAT2B	90.0178	1.90976	0.467135	4.08824	4.34665e-05	0.000304619	1.78524	up
ENSG00000139734	DIAPH3	525.927	1.81972	0.247297	7.35841	1.86112e-13	4.85507e-12	1.78511	up
ENSG00000254726	MEX3A	964.509	1.88977	0.439201	4.30274	1.68702e-05	0.000129188	1.78356	up
ENSG00000271554		2.63643	5.21301	3.09359	1.6851	0.0919695		1.78298	-
ENSG00000076108	BAZ2A	454.092	1.81203	0.2245	8.07142	6.94866e-16	2.46447e-14	1.78292	up
ENSG00000155966	AFF2	27.168	2.20525	0.874922	2.52051	0.0117185	0.0417411	1.78163	up
ENSG00000137558	PI15	21.6011	2.22801	0.982963	2.26663	0.0234128	0.0740204	1.78031	-
ENSG00000117139	KDM5B	372.785	1.84391	0.336245	5.48383	4.16219e-08	5.10957e-07	1.78026	up
ENSG00000101972	STAG2	1137.64	1.82708	0.292655	6.24311	4.28949e-10	7.25007e-09	1.77889	up
ENSG00000145332	KLHL8	405.889	1.87265	0.410635	4.56037	5.10637e-06	4.35811e-05	1.77886	up
ENSG00000138039	LHCGR	23.9985	2.55387	1.00736	2.5352	0.0112383	0.0402622	1.77847	up
ENSG00000164944	VIRMA	451.768	1.83412	0.315427	5.81472	6.0735e-09	8.50977e-08	1.77794	up
ENSG00000111885	MAN1A1	106.472	1.89132	0.441664	4.28227	1.84998e-05	0.000139938	1.77773	up
ENSG00000104643	MTMR9	165.951	1.85149	0.360908	5.1301	2.89587e-07	3.06533e-06	1.77764	up
ENSG00000179388	EGR3	2.28867	4.98119	2.97458	1.67458	0.0940163		1.7763	-
ENSG00000182903	ZNF721	306.646	1.85522	0.37786	4.90979	9.11718e-07	8.78315e-06	1.77624	up
ENSG00000184156	KCNQ3	23.3035	2.66595	1.18316	2.25325	0.0242437	0.076234	1.77549	-
ENSG00000197442	MAP3K5	102.109	1.92159	0.499197	3.84936	0.000118429	0.000749977	1.77538	up
ENSG00000113971	NPHP3	67.9182	1.97581	0.6003	3.29138	0.000996983	0.005016	1.77494	up
ENSG00000078114	NEBL	38.576	2.14948	0.82664	2.60026	0.0093153	0.0344546	1.77494	up
ENSG00000029363	BCLAF1	1131.55	1.80337	0.22649	7.96225	1.68934e-15	5.69608e-14	1.77466	up
ENSG00000146833	TRIM4	87.1943	1.94283	0.494168	3.93153	8.44076e-05	0.000555047	1.77396	up
ENSG00000072364	AFF4	228.585	1.87481	0.42646	4.39621	1.1016e-05	8.78882e-05	1.77374	up
ENSG00000174799	CEP135	281.217	1.835	0.331753	5.53124	3.17972e-08	3.96985e-07	1.77368	up
ENSG00000005187	ACSM3	4.95255	2.75273	1.75035	1.57267	0.115795	0.260822	1.77326	-
ENSG00000156017	CARNMT1	254.861	1.85619	0.389532	4.76517	1.88693e-06	1.73449e-05	1.77159	up
ENSG00000144724	PTPRG	279.112	1.8138	0.264121	6.8673	6.54275e-12	1.41303e-10	1.77125	up
ENSG00000115977	AAK1	275.775	1.83052	0.323346	5.66118	1.50332e-08	1.98831e-07	1.77103	up
ENSG00000213096	ZNF254	215.968	1.9707	0.606506	3.24927	0.00115702	0.0057162	1.77075	up
ENSG00000004799	PDK4	14.1761	2.18995	0.946656	2.31336	0.020703	0.0667976	1.77074	-
ENSG00000005020	SKAP2	722.12	1.81272	0.277166	6.54018	6.14431e-11	1.16127e-09	1.76954	up
ENSG00000108239	TBC1D12	86.9956	2.05159	0.736272	2.78646	0.00532872	0.0213386	1.7687	up
ENSG00000106299	WASL	333.957	1.82496	0.318076	5.73749	9.609e-09	1.31204e-07	1.76779	up
ENSG00000112406	HECA	108.248	1.86997	0.424017	4.41013	1.03309e-05	8.28561e-05	1.76722	up
ENSG00000089048	ESF1	1194.95	1.81439	0.291195	6.23087	4.63858e-10	7.79361e-09	1.76676	up
ENSG00000085719	CPNE3	686.955	1.81384	0.292111	6.20942	5.31813e-10	8.86027e-09	1.76591	up
ENSG00000170871	KIAA0232	154.934	1.83124	0.350399	5.22616	1.73068e-07	1.90943e-06	1.76544	up
ENSG00000230002	ALMS1-IT1	66.3186	1.91881	0.518822	3.69839	0.000216973	0.00128678	1.7652	up
ENSG00000179477	ALOX12B	37.621	2.43694	1.1887	2.0501	0.0403548	0.114854	1.76515	-
ENSG00000126653	NSRP1	2693.12	1.79308	0.225146	7.96407	1.66476e-15	5.62274e-14	1.76494	up
ENSG00000174953	DHX36	966.382	1.80805	0.278968	6.48119	9.10015e-11	1.67521e-09	1.76435	up
ENSG00000177425	PAWR	964.169	1.78676	0.205042	8.71415	2.92943e-18	1.39613e-16	1.76361	up
ENSG00000121892	PDS5A	760.766	1.81159	0.294637	6.14854	7.82002e-10	1.2564e-08	1.76298	up
ENSG00000084093	REST	257.007	1.82986	0.347257	5.26947	1.36815e-07	1.52989e-06	1.76294	up
ENSG00000112320	SOBP	169.463	1.82508	0.33465	5.45372	4.93276e-08	5.9778e-07	1.76226	up
ENSG00000159905	ZNF221	42.4023	2.62354	1.36181	1.92651	0.0540403	0.144804	1.76222	-
ENSG00000144283	PKP4	589.175	1.7996	0.256961	7.0034	2.49821e-12	5.67999e-11	1.76211	up
ENSG00000073792	IGF2BP2	613.575	1.80231	0.26873	6.70675	1.99011e-11	4.00161e-10	1.76174	up
ENSG00000170049	KCNAB3	90.6482	1.86823	0.452661	4.12722	3.67168e-05	0.000261288	1.76152	up
ENSG00000248727	LINC01948	3.82276	5.66726	2.98889	1.89611			1.76092	-
ENSG00000083223	TUT7	86.4505	1.97261	0.617264	3.19573	0.00139478	0.00674296	1.76086	up
ENSG00000103460	TOX3	70.3376	2.01265	0.678994	2.96416	0.00303509	0.0131758	1.76085	up
ENSG00000137492	THAP12	371	1.81747	0.319655	5.68573	1.30256e-08	1.73902e-07	1.76056	up
ENSG00000011405	PIK3C2A	391.012	1.86406	0.434659	4.28856	1.79835e-05	0.000136606	1.76033	up
ENSG00000198924	DCLRE1A	67.0637	2.03702	0.668179	3.04862	0.00229899	0.0103921	1.76001	up
ENSG00000137942	FNBP1L	275.572	1.86988	0.449235	4.16235	3.14982e-05	0.000226673	1.75998	up
ENSG00000163714	U2SURP	1597.48	1.78401	0.209311	8.52324	1.55147e-17	6.7014e-16	1.75961	up
ENSG00000166750	SLFN5	17.8843	2.53017	1.16143	2.17848	0.02937	0.0887232	1.75918	-
ENSG00000165732	DDX21	7105.56	1.78893	0.233848	7.64996	2.01047e-14	5.98493e-13	1.75855	up
ENSG00000100320	RBFOX2	572.92	1.80547	0.295776	6.10419	1.03323e-09	1.62836e-08	1.75738	up
ENSG00000163608	NEPRO	702.1	1.7882	0.236622	7.55721	4.11818e-14	1.18158e-12	1.75734	up
ENSG00000117020	AKT3	331.106	1.89777	0.507977	3.73593	0.000187021	0.00112633	1.75634	up
ENSG00000223812	PYDC2-AS1	3.63131	3.56911	2.16901	1.6455	0.0998661	0.233705	1.75519	-
ENSG00000129680	MAP7D3	731.907	1.80525	0.303509	5.94794	2.71541e-09	4.02962e-08	1.75415	up
ENSG00000082516	GEMIN5	292.76	1.81649	0.33443	5.4316	5.58502e-08	6.69055e-07	1.75393	up
ENSG00000147044	CASK	292.503	1.81262	0.321199	5.6433	1.66823e-08	2.1918e-07	1.75359	up
ENSG00000247402		3.89501	2.81566	1.66625	1.68982	0.0910628	0.218018	1.75318	-
ENSG00000160097	FNDC5	99.8788	2.02882	0.731544	2.77334	0.00554837	0.0221065	1.75264	up
ENSG00000213270	RPL6P25	12.9273	2.13354	0.907303	2.35152	0.0186967	0.0613305	1.75252	-
ENSG00000244556	ODCP	2.71561	5.20845	2.99811	1.73724	0.0823442		1.75243	-
ENSG00000047648	ARHGAP6	2.69694	3.11624	1.91314	1.62886	0.103343		1.75199	-
ENSG00000007952	NOX1	4.61981	4.36124	1.95211	2.23411	0.0254756	0.0791908	1.7512	-
ENSG00000267940		6.19351	2.49154	1.42885	1.74374	0.0812042	0.199647	1.75056	-
ENSG00000151012	SLC7A11	1536.8	1.77313	0.203631	8.70754	3.10535e-18	1.47289e-16	1.75015	up
ENSG00000005810	MYCBP2	408.824	1.85293	0.431371	4.29544	1.74351e-05	0.000132938	1.74932	up
ENSG00000113360	DROSHA	415.52	1.82901	0.381031	4.80016	1.58535e-06	1.47842e-05	1.74826	up
ENSG00000281332	LINC00997	4.89235	2.81503	1.64325	1.71308	0.086697	0.209837	1.74811	-
ENSG00000165156	ZHX1	360.31	1.8175	0.35572	5.10936	3.23247e-07	3.40164e-06	1.74792	up
ENSG00000148498	PARD3	697.255	1.80307	0.315834	5.70892	1.13695e-08	1.52821e-07	1.74699	up
ENSG00000172986	GXYLT2	90.0493	1.90425	0.496651	3.83418	0.000125981	0.000792419	1.74645	up
ENSG00000185477	GPRIN3	18.5499	2.12768	0.936356	2.2723	0.0230684	0.0731066	1.74605	-
ENSG00000072952	IRAG1	17.9045	2.32884	1.00927	2.30745	0.0210299	0.067663	1.74537	-
ENSG00000170522	ELOVL6	719.851	1.76532	0.193945	9.10218	8.85376e-20	4.91694e-18	1.7453	up
ENSG00000120594	PLXDC2	95.2564	1.81842	0.350916	5.18192	2.19611e-07	2.37794e-06	1.74528	up
ENSG00000069869	NEDD4	184.45	1.93288	0.580738	3.32832	0.000873725	0.0044657	1.74475	up
ENSG00000092140	G2E3	520.623	1.78206	0.260537	6.83997	7.92108e-12	1.6941e-10	1.74432	up
ENSG00000231887	PRH1	4.03427	3.4562	1.92634	1.79418	0.0727848	0.18294	1.74425	-
ENSG00000122203	KIAA1191	1865.99	1.81815	0.373165	4.87223	1.10344e-06	1.04824e-05	1.74298	up
ENSG00000180329	CCDC43	429.746	1.7787	0.260301	6.83326	8.30079e-12	1.77149e-10	1.74171	up
ENSG00000047188	YTHDC2	126.954	1.8701	0.481847	3.8811	0.000103985	0.000670658	1.74145	up
ENSG00000120800	UTP20	196.148	1.77717	0.265856	6.68472	2.31374e-11	4.61028e-10	1.74054	up
ENSG00000163788	SNRK	124.212	1.86825	0.473363	3.94676	7.92173e-05	0.000523696	1.74027	up
ENSG00000278703		14.7366	3.19621	1.51439	2.11056	0.0348101	0.102062	1.73866	-
ENSG00000171940	ZNF217	247.626	1.78986	0.300964	5.94707	2.7298e-09	4.04795e-08	1.73835	up
ENSG00000118058	KMT2A	260.176	1.79139	0.309921	5.78013	7.46409e-09	1.03352e-07	1.73798	up
ENSG00000261170		7.47855	3.17844	1.69917	1.87058	0.0614037	0.160162	1.73768	-
ENSG00000162086	ZNF75A	259.387	1.94152	0.619113	3.13597	0.00171285	0.00806174	1.73728	up
ENSG00000005700	IBTK	338.587	1.80143	0.342582	5.2584	1.45318e-07	1.61949e-06	1.73677	up
ENSG00000100393	EP300	340.464	1.81855	0.382405	4.75556	1.97899e-06	1.81059e-05	1.73659	up
ENSG00000147145	LPAR4	3.80363	3.54646	2.14568	1.65283	0.0983645	0.23112	1.7365	-
ENSG00000135414	GDF11	288.95	1.7886	0.312946	5.71535	1.09481e-08	1.47558e-07	1.73617	up
ENSG00000185551	NR2F2	250.433	1.7782	0.275306	6.45898	1.05413e-10	1.92095e-09	1.73576	up
ENSG00000107560	RAB11FIP2	127.256	1.82206	0.37363	4.87664	1.07911e-06	1.0266e-05	1.73517	up
ENSG00000116641	DOCK7	312.648	1.87612	0.50591	3.70842	0.00020856	0.00124172	1.735	up
ENSG00000115419	GLS	143.736	1.80209	0.354325	5.08599	3.65716e-07	3.81013e-06	1.73477	up
ENSG00000074054	CLASP1	202.699	1.78865	0.311631	5.73962	9.48879e-09	1.29652e-07	1.73375	up
ENSG00000138078	PREPL	299.458	1.80218	0.350918	5.13562	2.81208e-07	2.983e-06	1.73366	up
ENSG00000073712	FERMT2	589.427	1.75548	0.196129	8.95063	3.53449e-19	1.84894e-17	1.73356	up
ENSG00000145349	CAMK2D	405.807	1.77781	0.285363	6.22999	4.6647e-10	7.82423e-09	1.73318	up
ENSG00000250917		8.22052	2.86888	1.47163	1.94945	0.0512416	0.138654	1.73216	-
ENSG00000074181	NOTCH3	327.345	1.78184	0.294481	6.05079	1.4414e-09	2.21357e-08	1.73212	up
ENSG00000175874	CREG2	34.5207	2.28052	1.01728	2.2418	0.0249745	0.0780617	1.73137	-
ENSG00000261654		4.92106	4.01307	2.47127	1.62389	0.104399	0.24149	1.73136	-
ENSG00000119042	SATB2	141.49	1.82916	0.428129	4.27246	1.9333e-05	0.000145519	1.72971	up
ENSG00000224094	RPS24P8	127.821	1.88412	0.543918	3.46397	0.000532261	0.00287458	1.72807	up
ENSG00000073614	KDM5A	513.111	1.7546	0.221233	7.93101	2.17375e-15	7.24315e-14	1.72758	up
ENSG00000251188		7.0807	2.87691	1.74059	1.65283	0.0983653	0.23112	1.72707	-
ENSG00000163125	RPRD2	629.65	1.7585	0.243988	7.20736	5.70491e-13	1.40329e-11	1.72624	up
ENSG00000169184	MN1	61.2145	1.93384	0.606193	3.19013	0.00142208	0.00686157	1.72609	up
ENSG00000197619	ZNF615	41.2664	1.89893	0.582508	3.25992	0.00111445	0.00553762	1.72556	up
ENSG00000198728	LDB1	277.093	1.79701	0.359366	5.0005	5.71804e-07	5.69391e-06	1.72538	up
ENSG00000213713	PIGCP1	5.38255	2.71741	1.66031	1.63669	0.101696	0.237008	1.72538	-
ENSG00000066027	PPP2R5A	190.377	1.76616	0.27713	6.37305	1.85307e-10	3.26569e-09	1.72512	up
ENSG00000269933		7.15969	3.38172	1.98574	1.703	0.0885677	0.213385	1.72494	-
ENSG00000093000	NUP50	745.078	1.75895	0.249194	7.05856	1.68238e-12	3.93799e-11	1.72491	up
ENSG00000120327	PCDHB14	9.64443	2.45184	1.32052	1.85673	0.0633501	0.16403	1.72381	-
ENSG00000157827	FMNL2	133.9	1.84459	0.467125	3.94881	7.854e-05	0.000519911	1.72329	up
ENSG00000170264	FAM161A	416.224	1.80831	0.404573	4.46968	7.83372e-06	6.44712e-05	1.72126	up
ENSG00000064652	SNX24	319.378	1.79029	0.359341	4.98215	6.28814e-07	6.20859e-06	1.72077	up
ENSG00000138593	SECISBP2L	111.989	1.80118	0.387656	4.64632	3.37901e-06	2.98406e-05	1.72075	up
ENSG00000136813	ECPAS	1024.56	1.75439	0.248104	7.0712	1.536e-12	3.63397e-11	1.72074	up
ENSG00000204178	MACO1	205.218	1.78548	0.340247	5.24759	1.54098e-07	1.70965e-06	1.71998	up
ENSG00000144619	CNTN4	1.94857	4.41136	2.50817	1.75879	0.0786125		1.71866	-
ENSG00000163827	LRRC2	7.88359	2.98982	1.58615	1.88495	0.0594363	0.155953	1.71849	-
ENSG00000253598	SLC10A5	8.08163	3.65067	2.0364	1.79271	0.07302	0.183392	1.71719	-
ENSG00000185532	PRKG1	39.2492	1.85582	0.594824	3.11994	0.00180887	0.00843828	1.71554	up
ENSG00000147010	SH3KBP1	1122.46	1.79338	0.376688	4.76091	1.92723e-06	1.76812e-05	1.71533	up
ENSG00000166233	ARIH1	599.283	1.74219	0.221893	7.85145	4.11247e-15	1.33225e-13	1.71528	up
ENSG00000197978	GOLGA6L9	14.9673	2.44521	1.19059	2.05378	0.0399974	0.114033	1.71474	-
ENSG00000136014	USP44	21.0787	2.00331	0.913403	2.19324	0.0282903	0.0861572	1.71451	-
ENSG00000101868	POLA1	510.381	1.7869	0.364979	4.8959	9.78592e-07	9.36821e-06	1.71437	up
ENSG00000171467	ZNF318	153.267	1.7837	0.349776	5.09956	3.40436e-07	3.56738e-06	1.71373	up
ENSG00000090989	EXOC1	175.881	1.75679	0.284185	6.18184	6.3359e-10	1.03986e-08	1.71203	up
ENSG00000281026	N4BP2L2-IT2	3.52856	4.2693	2.43352	1.75437	0.0793668	0.196014	1.7105	-
ENSG00000086300	SNX10	240.102	1.7465	0.256286	6.81465	9.44919e-12	1.9951e-10	1.71047	up
ENSG00000081189	MEF2C	79.2445	1.95828	0.674996	2.90118	0.00371765	0.0157156	1.71011	up
ENSG00000164675	IQUB	11.3624	2.13815	1.06227	2.01281	0.044135	0.123284	1.70998	-
ENSG00000171016	PYGO1	79.0979	1.84037	0.500666	3.67585	0.000237055	0.00139752	1.70979	up
ENSG00000233503	HNRNPLP1	2.26376	3.26641	1.75637	1.85975	0.0629214		1.70928	-
ENSG00000166037	CEP57	909.322	1.77601	0.354093	5.01566	5.28521e-07	5.30547e-06	1.7091	up
ENSG00000148672	GLUD1	1095.8	1.72639	0.178998	9.64474	5.174e-22	3.62473e-20	1.70878	up
ENSG00000175054	ATR	158.292	1.84707	0.509711	3.62376	0.000290346	0.00167972	1.70819	up
ENSG00000062650	WAPL	600.108	1.73838	0.239381	7.26198	3.81459e-13	9.59748e-12	1.70767	up
ENSG00000237289	CKMT1B	50.1441	1.81355	0.471133	3.84933	0.000118439	0.000749977	1.70703	up
ENSG00000124098	FAM210B	593.41	1.74283	0.261669	6.66044	2.73015e-11	5.38586e-10	1.706	up
ENSG00000074603	DPP8	713.127	1.73983	0.251353	6.92187	4.45735e-12	9.82996e-11	1.70592	up
ENSG00000091436	MAP3K20	692.985	1.78804	0.393005	4.54966	5.37325e-06	4.56819e-05	1.705	up
ENSG00000134873	CLDN10	554.677	3.26663	1.09563	2.98153	0.00286816	0.0125583	1.70476	up
ENSG00000114062	UBE3A	1371.56	1.72986	0.216628	7.98536	1.40114e-15	4.79777e-14	1.70448	up
ENSG00000090621	PABPC4	1214.96	1.74141	0.264413	6.58597	4.51925e-11	8.69046e-10	1.70372	up
ENSG00000115841	RMDN2	34.6327	1.95951	0.6993	2.80211	0.00507698	0.0204919	1.70323	up
ENSG00000116991	SIPA1L2	214.855	1.74004	0.259884	6.69545	2.15008e-11	4.30581e-10	1.70313	up
ENSG00000253394	LINC00534	4.9907	2.64892	1.5555	1.70294	0.0885802	0.213389	1.7027	-
ENSG00000064989	CALCRL	14.9592	1.93477	0.81929	2.36152	0.0182	0.0599492	1.70141	-
ENSG00000165355	FBXO33	183.553	1.82528	0.479876	3.80365	0.000142578	0.000884346	1.7013	up
ENSG00000185352	HS6ST3	91.5714	1.91343	0.621158	3.08042	0.00206707	0.00948212	1.70119	up
ENSG00000133657	ATP13A3	340.967	1.74948	0.30029	5.82596	5.67845e-09	8.00149e-08	1.70095	up
ENSG00000118762	PKD2	53.5383	2.14706	0.90262	2.37869	0.0173741	0.057766	1.70094	-
ENSG00000231776	LINC01611	4.41153	3.47066	1.9107	1.81643	0.0693037	0.17645	1.70059	-
ENSG00000102081	FMR1	282.46	1.82845	0.488286	3.74462	0.000180666	0.00109304	1.70037	up
ENSG00000280385		12.206	2.3345	1.19658	1.95097	0.0510606	0.138277	1.70033	-
ENSG00000184898	RBM43	24.6452	2.0843	0.859675	2.42452	0.0153285	0.0520828	1.70021	-
ENSG00000133687	TMTC1	150.18	1.8286	0.485735	3.7646	0.000166818	0.00101764	1.6988	up
ENSG00000132122	SPATA6	80.9984	2.02855	0.810354	2.50329	0.0123044	0.0435232	1.69718	up
ENSG00000113594	LIFR	117.8	1.83722	0.494763	3.71334	0.000204538	0.00121997	1.69685	up
ENSG00000160360	GPSM1	161.048	1.77381	0.372209	4.76561	1.88279e-06	1.73217e-05	1.6962	up
ENSG00000280798	LINC00294	52.0667	1.97349	0.748952	2.635	0.00841385	0.0316173	1.69617	up
ENSG00000141933	TPGS1	33.0281	2.29	0.978555	2.34018	0.0192745	0.062903	1.69602	-
ENSG00000115750	TAF1B	380.178	1.74397	0.302454	5.76606	8.11459e-09	1.11955e-07	1.6951	up
ENSG00000149571	KIRREL3	4.05941	3.42666	1.97915	1.73137	0.0833851	0.203698	1.69419	-
ENSG00000057019	DCBLD2	285.423	1.7529	0.333769	5.25183	1.50595e-07	1.67454e-06	1.69402	up
ENSG00000178074	C2orf69	283.511	1.73884	0.298567	5.82396	5.74708e-09	8.08097e-08	1.69198	up
ENSG00000286511		11.5915	3.93728	1.91614	2.0548	0.039898	0.113799	1.69095	-
ENSG00000138594	TMOD3	494.952	1.73973	0.303334	5.73535	9.73105e-09	1.32596e-07	1.69062	up
ENSG00000101333	PLCB4	101.894	1.84275	0.542499	3.39678	0.000681837	0.00358285	1.69023	up
ENSG00000145725	PPIP5K2	245.138	1.79094	0.438384	4.08532	4.40157e-05	0.000308358	1.68959	up
ENSG00000151466	SCLT1	278.172	1.73853	0.310723	5.59511	2.20483e-08	2.82748e-07	1.68879	up
ENSG00000177311	ZBTB38	103.902	1.78349	0.41554	4.29199	1.77081e-05	0.000134669	1.68824	up
ENSG00000103042	SLC38A7	166.457	1.76772	0.394056	4.48597	7.25844e-06	6.02368e-05	1.68814	up
ENSG00000025796	SEC63	1796.66	1.70741	0.193767	8.81165	1.23322e-18	6.17422e-17	1.68709	up
ENSG00000147548	NSD3	764.963	1.72983	0.285079	6.06791	1.29587e-09	2.00599e-08	1.68632	up
ENSG00000253485	PCDHGA5	8.7892	2.17562	1.10664	1.96598	0.0493013	0.13445	1.68621	-
ENSG00000214760	RPL21P1	939.699	2.21666	1.08482	2.04334	0.0410185	0.116392	1.68595	-
ENSG00000125676	THOC2	1126.02	1.74997	0.347116	5.04144	4.62039e-07	4.70893e-06	1.68526	up
ENSG00000134909	ARHGAP32	176.505	1.78783	0.427555	4.18151	2.89576e-05	0.000209683	1.68439	up
ENSG00000052126	PLEKHA5	366.889	1.72344	0.274798	6.27165	3.57248e-10	6.10586e-09	1.68394	up
ENSG00000152942	RAD17	484.625	1.72564	0.281609	6.12779	8.911e-10	1.42132e-08	1.6832	up
ENSG00000137821	LRRC49	284.045	1.75062	0.356775	4.90679	9.25798e-07	8.91013e-06	1.68304	up
ENSG00000145908	ZNF300	117.642	1.87725	0.605885	3.09836	0.00194594	0.00900354	1.68304	up
ENSG00000150672	DLG2	8.29329	2.2572	1.24747	1.80943	0.0703841	0.178445	1.68141	-
ENSG00000248774		4.40662	3.19563	1.73453	1.84236	0.0654228	0.168451	1.67967	-
ENSG00000169519	METTL15	156.141	1.76563	0.408367	4.32363	1.53479e-05	0.000118446	1.67958	up
ENSG00000212664		94.8751	1.96836	0.767425	2.56489	0.0103208	0.0375518	1.67912	up
ENSG00000112739	PRPF4B	815.862	1.70899	0.238537	7.16445	7.80998e-13	1.89989e-11	1.67878	up
ENSG00000185515	BRCC3	762.321	1.70585	0.228383	7.46924	8.06589e-14	2.20903e-12	1.67865	up
ENSG00000166025	AMOTL1	152.949	1.72253	0.290121	5.93729	2.89776e-09	4.27668e-08	1.67765	up
ENSG00000185947	ZNF267	188.412	1.79547	0.482819	3.71872	0.000200238	0.00119793	1.67742	up
ENSG00000021776	AQR	327.349	1.72112	0.285899	6.02003	1.74385e-09	2.64932e-08	1.6773	up
ENSG00000146414	SHPRH	80.7574	1.79339	0.463291	3.87098	0.0001084	0.00069574	1.67653	up
ENSG00000157654	PALM2AKAP2	155.559	1.74075	0.345093	5.04428	4.55229e-07	4.64986e-06	1.67639	up
ENSG00000169851	PCDH7	14.6244	3.12341	1.69073	1.84737	0.0646936	0.167138	1.67595	-
ENSG00000128487	SPECC1	317.566	1.74384	0.365896	4.76594	1.87975e-06	1.73084e-05	1.67557	up
ENSG00000229022	RPL6P3	16.3361	1.96298	0.796407	2.46479	0.0137093	0.047584	1.67519	up
ENSG00000126001	CEP250	328.284	1.72673	0.311429	5.54455	2.94718e-08	3.70284e-07	1.67446	up
ENSG00000165730	STOX1	42.5998	1.8215	0.54926	3.31628	0.000912246	0.00463748	1.67384	up
ENSG00000108424	KPNB1	7221.5	1.72505	0.312417	5.52162	3.35886e-08	4.17509e-07	1.67345	up
ENSG00000173276	ZBTB21	88.685	1.77426	0.433351	4.09428	4.23478e-05	0.00029762	1.67339	up
ENSG00000149308	NPAT	197.778	1.76027	0.406431	4.33104	1.48405e-05	0.000114932	1.67304	up
ENSG00000286662		3.5966	3.26054	1.90269	1.71364	0.0865944	0.209675	1.67272	-
ENSG00000104332	SFRP1	517.539	1.73635	0.347052	5.00314	5.64031e-07	5.62216e-06	1.67243	up
ENSG00000111731	C2CD5	119.359	1.74919	0.385397	4.53869	5.66053e-06	4.78778e-05	1.67032	up
ENSG00000272599		70.4051	1.7816	0.473049	3.76622	0.00016574	0.00101231	1.66955	up
ENSG00000164197	RNF180	6.28723	2.27584	1.3114	1.73544	0.0826636	0.202357	1.66948	-
ENSG00000168461	RAB31	855.872	1.72991	0.3396	5.09398	3.50633e-07	3.66648e-06	1.66929	up
ENSG00000150907	FOXO1	74.4813	1.82364	0.504876	3.61205	0.00030379	0.00174882	1.6688	up
ENSG00000132321	IQCA1	49.7233	2.42874	1.20926	2.00845	0.0445952	0.124335	1.66874	-
ENSG00000225156		28.6339	2.18576	0.936377	2.33427	0.0195816	0.0637061	1.66855	-
ENSG00000198265	HELZ	279.05	1.72957	0.340918	5.07326	3.91054e-07	4.05493e-06	1.66803	up
ENSG00000056097	ZFR	962.789	1.68895	0.206074	8.19588	2.48775e-16	9.41262e-15	1.66654	up
ENSG00000164398	ACSL6	63.4533	1.95014	0.741255	2.63086	0.00851702	0.0319626	1.66633	up
ENSG00000186318	BACE1	47.5937	1.89966	0.655573	2.89771	0.00375901	0.01586	1.66611	up
ENSG00000266538		3.38597	3.18993	2.01323	1.58448	0.113084	0.2562	1.66602	-
ENSG00000116731	PRDM2	284.829	1.76522	0.436277	4.04611	5.20769e-05	0.000359133	1.66577	up
ENSG00000080802	CNOT4	179.008	1.76583	0.440268	4.0108	6.05145e-05	0.000410596	1.66575	up
ENSG00000198380	GFPT1	530.693	1.73171	0.348609	4.96747	6.78325e-07	6.64779e-06	1.66537	up
ENSG00000081913	PHLPP1	99.117	1.83868	0.557683	3.297	0.000977221	0.00492611	1.66482	up
ENSG00000279844		3.73785	5.39412	2.79388	1.93069	0.0535213	0.143588	1.66469	-
ENSG00000143514	TP53BP2	346.246	1.69333	0.238694	7.09414	1.30157e-12	3.09782e-11	1.66416	up
ENSG00000272986		4.02319	4.52458	2.4789	1.82524	0.0679656	0.17369	1.66324	-
ENSG00000248019	FAM13A-AS1	2.50396	5.13825	3.21574	1.59784	0.110079		1.66281	-
ENSG00000251468		4.75197	3.46189	2.03684	1.69964	0.0891987	0.214488	1.6626	-
ENSG00000117724	CENPF	5798.63	1.69454	0.246433	6.87628	6.14343e-12	1.32969e-10	1.66255	up
ENSG00000253731	PCDHGA6	32.1731	1.9553	0.754094	2.59291	0.00951674	0.03509	1.66209	up
ENSG00000050344	NFE2L3	271.094	1.72365	0.338835	5.087	3.63768e-07	3.79382e-06	1.66158	up
ENSG00000107938	EDRF1	83.5323	1.7975	0.487484	3.68729	0.000226653	0.00134098	1.66059	up
ENSG00000231646	FSIP2-AS1	4.66541	2.56418	1.80814	1.41813	0.156152	0.324616	1.65938	-
ENSG00000232594		6.22691	2.42886	1.33275	1.82244	0.0683879	0.174589	1.65932	-
ENSG00000111981	ULBP1	900.046	1.68451	0.223219	7.54647	4.47223e-14	1.27578e-12	1.65879	up
ENSG00000167549	CORO6	51.6165	2.17765	1.08908	1.99953	0.0455509	0.126254	1.65838	-
ENSG00000102189	EEA1	697.68	1.69435	0.264148	6.41439	1.41387e-10	2.53219e-09	1.65816	up
ENSG00000287808	DHX9-AS1	34.2433	1.88638	0.757504	2.49025	0.0127652	0.0447697	1.65764	up
ENSG00000118898	PPL	59.7981	2.01423	0.801015	2.5146	0.0119168	0.0423367	1.65716	up
ENSG00000169855	ROBO1	464.815	1.68011	0.20084	8.3654	5.99125e-17	2.38999e-15	1.65709	up
ENSG00000180914	OXTR	12.5933	2.53194	1.35379	1.87026	0.0614475	0.160234	1.65687	-
ENSG00000148700	ADD3	807.037	1.71707	0.340366	5.04478	4.54043e-07	4.64253e-06	1.65652	up
ENSG00000153815	CMIP	173.146	1.74702	0.406971	4.29273	1.76488e-05	0.000134321	1.65615	up
ENSG00000165521	EML5	18.7511	1.95175	0.801777	2.43428	0.0149214	0.050988	1.65582	-
ENSG00000114331	ACAP2	473.338	1.69351	0.271475	6.23817	4.42705e-10	7.4635e-09	1.65491	up
ENSG00000172175	MALT1	118.853	1.74591	0.414203	4.21512	2.4965e-05	0.000183114	1.65448	up
ENSG00000214353	VAC14-AS1	7.79553	2.80992	1.55688	1.80484	0.0710992	0.179771	1.65382	-
ENSG00000225280		46.2844	1.84884	0.592561	3.12008	0.00180803	0.00843636	1.65319	up
ENSG00000259291	ZNF710-AS1	33.2338	2.30015	1.05829	2.17346	0.0297454	0.0896361	1.65312	-
ENSG00000143442	POGZ	548.782	1.69391	0.277282	6.10897	1.00273e-09	1.58282e-08	1.65287	up
ENSG00000054523	KIF1B	851.175	1.7057	0.315036	5.4143	6.15284e-08	7.29582e-07	1.65278	up
ENSG00000159459	UBR1	176.231	1.73319	0.389807	4.44627	8.73758e-06	7.11422e-05	1.6526	up
ENSG00000101096	NFATC2	28.2306	2.06053	0.919686	2.24047	0.0250605	0.0781949	1.65259	-
ENSG00000138398	PPIG	2225.53	1.67472	0.206761	8.09978	5.5059e-16	1.97754e-14	1.65226	up
ENSG00000132466	ANKRD17	550.704	1.67674	0.21499	7.79914	6.23287e-15	1.97717e-13	1.65221	up
ENSG00000144668	ITGA9	104.761	1.87679	0.630117	2.97848	0.00289685	0.0126644	1.65142	up
ENSG00000152413	HOMER1	351.228	1.73689	0.406732	4.27036	1.95157e-05	0.000146727	1.65117	up
ENSG00000153827	TRIP12	489.517	1.70096	0.308699	5.5101	3.58631e-08	4.44389e-07	1.65086	up
ENSG00000232775	BMS1P22	5.68896	2.71979	1.81988	1.49449	0.135048	0.292458	1.65047	-
ENSG00000059769	DNAJC25	88.5063	1.90774	0.704947	2.70621	0.00680559	0.0263685	1.65022	up
ENSG00000261630		2.73187	5.11746	2.9621	1.72764	0.0840521		1.65002	-
ENSG00000151806	GUF1	471.406	1.6902	0.282313	5.98699	2.13764e-09	3.20824e-08	1.64935	up
ENSG00000152217	SETBP1	115.845	1.77925	0.501205	3.54995	0.000385311	0.00216224	1.64877	up
ENSG00000183783	KCTD8	10.1703	2.85836	1.42787	2.00183	0.0453026	0.125688	1.64862	-
ENSG00000171517	LPAR3	418.502	1.69291	0.294792	5.74271	9.3174e-09	1.27662e-07	1.6486	up
ENSG00000182568	SATB1	249.146	1.6885	0.27589	6.1202	9.34559e-10	1.48585e-08	1.64821	up
ENSG00000134900	TPP2	429.037	1.67358	0.220292	7.5971	3.02843e-14	8.8167e-13	1.64816	up
ENSG00000163694	RBM47	45.54	1.9456	0.760446	2.5585	0.0105125	0.0381096	1.6473	up
ENSG00000175073	VCPIP1	97.4497	1.73775	0.416254	4.17473	2.98346e-05	0.000215483	1.64671	up
ENSG00000162620	LRRIQ3	179.023	1.81044	0.573104	3.15901	0.00158308	0.00754295	1.64516	up
ENSG00000154153	RETREG1	292.445	1.71542	0.367333	4.66992	3.01313e-06	2.68728e-05	1.64442	up
ENSG00000089902	RCOR1	162.717	1.73537	0.418604	4.14562	3.38899e-05	0.000242214	1.64296	up
ENSG00000167525	PROCA1	119.146	2.99372	1.84638	1.6214	0.104932	0.242333	1.64274	-
ENSG00000280193		8.41835	2.42631	1.46776	1.65307	0.0983161	0.231105	1.64245	-
ENSG00000260804	LINC01963	33.3671	2.07231	0.989827	2.0936	0.0362952	0.105434	1.64213	-
ENSG00000077935	SMC1B	46.8696	1.96186	0.78946	2.48507	0.0129527	0.0453231	1.64127	up
ENSG00000145715	RASA1	107.049	1.71978	0.387559	4.43746	9.10277e-06	7.38427e-05	1.6411	up
ENSG00000224078	SNHG14	3189.14	1.66455	0.215887	7.71029	1.25535e-14	3.85272e-13	1.64079	up
ENSG00000011114	BTBD7	220.738	1.80195	0.558462	3.22664	0.00125255	0.0061316	1.63955	up
ENSG00000198648	STK39	175.116	1.69596	0.333523	5.08498	3.6767e-07	3.82741e-06	1.6393	up
ENSG00000164099	PRSS12	118.728	1.73495	0.423598	4.09574	4.20824e-05	0.00029607	1.6392	up
ENSG00000163428	LRRC58	859.885	1.68639	0.30646	5.50282	3.73757e-08	4.61689e-07	1.63855	up
ENSG00000043093	DCUN1D1	346.54	1.70284	0.357063	4.76901	1.8513e-06	1.70636e-05	1.63821	up
ENSG00000148411	NACC2	155.754	1.8475	0.639468	2.88912	0.00386324	0.0162514	1.63786	up
ENSG00000054267	ARID4B	529.649	1.6846	0.30079	5.60059	2.13619e-08	2.74836e-07	1.63781	up
ENSG00000083312	TNPO1	1056.85	1.67456	0.271045	6.17814	6.48623e-10	1.0619e-08	1.63663	up
ENSG00000267102		2.52682	5.15166	3.25061	1.58483	0.113006		1.63588	-
ENSG00000100629	CEP128	108.271	1.70825	0.365262	4.67678	2.91413e-06	2.60251e-05	1.63565	up
ENSG00000055211	GINM1	835.386	1.66469	0.238791	6.97135	3.13924e-12	7.04853e-11	1.6355	up
ENSG00000108021	TASOR2	255.967	1.73596	0.442401	3.92396	8.71051e-05	0.000571458	1.63466	up
ENSG00000089916	GPATCH2L	190.389	1.67367	0.280469	5.9674	2.4107e-09	3.59358e-08	1.63422	up
ENSG00000287870		2.35927	5.05298	3.23438	1.56227	0.118224		1.63418	-
ENSG00000153707	PTPRD	141.528	1.7469	0.453627	3.85096	0.000117657	0.000746934	1.63315	up
ENSG00000077264	PAK3	42.6764	1.80468	0.601309	3.00125	0.0026887	0.0118695	1.63298	up
ENSG00000289606		23.42	1.89014	0.707566	2.67133	0.00755524	0.0288003	1.63279	up
ENSG00000240423	LINC00636	4.38015	2.44909	1.43108	1.71135	0.087016	0.210391	1.63243	-
ENSG00000163349	HIPK1	162.094	1.67839	0.29703	5.65059	1.59896e-08	2.10778e-07	1.63239	up
ENSG00000282961	PRNCR1	1.90571	3.73794	1.98305	1.88495	0.0594369		1.6322	-
ENSG00000075391	RASAL2	89.8919	1.73393	0.457873	3.78693	0.000152518	0.000941413	1.63154	up
ENSG00000256667	KLRA1P	10.8724	2.07833	1.1488	1.80913	0.0704314	0.178519	1.63123	-
ENSG00000198722	UNC13B	273.082	1.67389	0.286001	5.85273	4.83563e-09	6.88236e-08	1.6301	up
ENSG00000277443	MARCKS	1599.78	1.67419	0.292372	5.72622	1.02692e-08	1.39354e-07	1.62978	up
ENSG00000196092	PAX5	6.05145	2.43733	1.46162	1.66756	0.0954039	0.225767	1.62971	-
ENSG00000091986	CCDC80	162.984	1.74709	0.498397	3.50542	0.000455894	0.00250932	1.62881	up
ENSG00000290048		3.85007	5.46868	2.82659	1.93473	0.0530234	0.142464	1.62881	-
ENSG00000204130	RUFY2	65.3876	1.79397	0.571009	3.14176	0.00167936	0.00793493	1.62873	up
ENSG00000197056	ZMYM1	117.388	1.75655	0.510671	3.4397	0.000582369	0.00310796	1.62745	up
ENSG00000138468	SENP7	170.532	1.70675	0.393897	4.33298	1.47104e-05	0.000114014	1.62743	up
ENSG00000258500		3.8634	3.35239	1.74766	1.91821	0.0550842	0.146906	1.62739	-
ENSG00000020577	SAMD4A	66.64	1.85768	0.677237	2.74302	0.00608764	0.0239594	1.62698	up
ENSG00000112062	MAPK14	257.091	1.67694	0.311904	5.37647	7.59583e-08	8.87942e-07	1.62616	up
ENSG00000096401	CDC5L	972.568	1.64731	0.202896	8.11902	4.69979e-16	1.70656e-14	1.62606	up
ENSG00000196653	ZNF502	134.267	1.75571	0.505743	3.47155	0.000517467	0.00280162	1.62303	up
ENSG00000245573	BDNF-AS	71.632	1.76882	0.54282	3.25857	0.00111977	0.00555986	1.62289	up
ENSG00000140386	SCAPER	640.564	1.67123	0.315497	5.29713	1.1764e-07	1.332e-06	1.62125	up
ENSG00000123607	TTC21B	153.465	1.66394	0.293599	5.66739	1.44989e-08	1.92406e-07	1.62098	up
ENSG00000005249	PRKAR2B	133.493	1.81335	0.612171	2.96216	0.00305486	0.0132413	1.62065	up
ENSG00000163781	TOPBP1	626.694	1.65469	0.258449	6.40239	1.52959e-10	2.72958e-09	1.6206	up
ENSG00000136111	TBC1D4	193.309	1.68912	0.367785	4.59267	4.37602e-06	3.77213e-05	1.61942	up
ENSG00000137962	ARHGAP29	49.9191	1.9379	0.78993	2.45326	0.0141568	0.0488892	1.61872	up
ENSG00000151748	SAV1	255.019	1.7029	0.40502	4.20449	2.61676e-05	0.000191368	1.61868	up
ENSG00000259319	JDP2-AS1	20.4234	2.53053	1.28931	1.96269			1.61836	-
ENSG00000203914	HSP90B3P	4.05077	3.40537	1.7203	1.97952	0.0477579	0.131233	1.61771	-
ENSG00000128915	ICE2	640.865	1.63333	0.177623	9.19548	3.73337e-20	2.16426e-18	1.61747	up
ENSG00000109458	GAB1	69.9073	1.85452	0.661981	2.80147	0.00508707	0.0205242	1.61688	up
ENSG00000174948	GPR149	2.53362	4.1136	2.81596	1.46082	0.144066		1.61659	-
ENSG00000135945	REV1	148.209	1.72415	0.462709	3.72622	0.000194375	0.00116637	1.61657	up
ENSG00000152952	PLOD2	539.385	1.66747	0.31343	5.32007	1.03726e-07	1.1812e-06	1.61656	up
ENSG00000177565	TBL1XR1	823.403	1.65148	0.264221	6.25038	4.09456e-10	6.93243e-09	1.61551	up
ENSG00000179841	AKAP5	34.9741	1.97307	0.889422	2.21837	0.0265298	0.0819027	1.61506	-
ENSG00000170667	RASA4B	9.33338	3.9751	1.67143	2.37827	0.0173942	0.0578139	1.61466	-
ENSG00000188211	NCR3LG1	122.606	1.78191	0.581809	3.0627	0.00219349	0.00996746	1.61372	up
ENSG00000112701	SENP6	632.387	1.66755	0.324959	5.13156	2.87349e-07	3.04651e-06	1.61354	up
ENSG00000164070	HSPA4L	373.184	1.67883	0.359641	4.66808	3.04026e-06	2.70904e-05	1.61322	up
ENSG00000152601	MBNL1	186.96	1.67737	0.361168	4.64428	3.41262e-06	3.01106e-05	1.61262	up
ENSG00000174106	LEMD3	148.159	1.72191	0.459092	3.75067	0.000176361	0.00106993	1.61257	up
ENSG00000173473	SMARCC1	2102.37	1.63162	0.196637	8.29761	1.06228e-16	4.1622e-15	1.61168	up
ENSG00000120696	KBTBD7	149.651	1.7738	0.55678	3.18582	0.00144342	0.0069527	1.61156	up
ENSG00000253846	PCDHGA10	45.9638	1.89084	0.7488	2.52516	0.0115646	0.0412448	1.61099	up
ENSG00000273141		3.26409	2.76488	1.87142	1.47742	0.139562	0.29926	1.61054	-
ENSG00000241088	RPL17P44	1.66954	3.22314	2.10723	1.52956	0.126125		1.60998	-
ENSG00000164327	RICTOR	113.989	1.78968	0.591708	3.0246	0.00248961	0.0110919	1.6097	up
ENSG00000220804	LINC01881	69.7963	1.71017	0.4485	3.81308	0.000137246	0.000854332	1.6097	up
ENSG00000166147	FBN1	20.4394	2.14379	0.979041	2.18968	0.0285473	0.08682	1.60958	-
ENSG00000110090	CPT1A	700.215	1.64714	0.27324	6.02819	1.6581e-09	2.52873e-08	1.60874	up
ENSG00000005436	GCFC2	352.394	1.65255	0.299182	5.52355	3.32219e-08	4.13211e-07	1.60787	up
ENSG00000258568	RHOQP1	5.60962	2.43734	1.50088	1.62393	0.10439	0.24149	1.6077	-
ENSG00000125249	RAP2A	218.982	1.68421	0.393032	4.28517	1.82602e-05	0.000138601	1.60769	up
ENSG00000201700	SNORD113-3	2.22966	4.9715	3.25274	1.5284	0.126412		1.60661	-
ENSG00000198743	SLC5A3	99.0427	1.69374	0.419485	4.03767	5.39853e-05	0.000370094	1.60605	up
ENSG00000038382	TRIO	121.24	1.74464	0.503966	3.46182	0.000536544	0.00289456	1.60568	up
ENSG00000205339	IPO7	2993.31	1.63217	0.231638	7.0462	1.83876e-12	4.27376e-11	1.60513	up
ENSG00000179855	GIPC3	21.2045	1.94717	0.849846	2.2912	0.0219519	0.070174	1.60479	-
ENSG00000153721	CNKSR3	110.485	1.68163	0.378974	4.43731	9.10895e-06	7.38626e-05	1.6046	up
ENSG00000144642	RBMS3	35.489	1.93675	0.847611	2.28495	0.0223155	0.0711297	1.60408	-
ENSG00000280623	PCAT14	67.1436	1.68461	0.467011	3.60721	0.00030951	0.00177659	1.60397	up
ENSG00000082175	PGR	42.2114	2.11313	1.05333	2.00615			1.60395	-
ENSG00000112531	QKI	1320.51	1.63841	0.265256	6.17671	6.54531e-10	1.0698e-08	1.60275	up
ENSG00000011258	MBTD1	159.759	1.68823	0.405286	4.16552	3.10639e-05	0.000224036	1.60218	up
ENSG00000124782	RREB1	101.873	1.70603	0.45434	3.75496	0.000173373	0.00105277	1.60177	up
ENSG00000132825	PPP1R3D	26.104	1.78062	0.622447	2.86068	0.00422731	0.0175373	1.60105	up
ENSG00000188042	ARL4C	341.815	1.64095	0.286248	5.7326	9.8903e-09	1.34674e-07	1.6005	up
ENSG00000112893	MAN2A1	266.915	1.64137	0.283492	5.78985	7.04496e-09	9.81542e-08	1.59974	up
ENSG00000165934	CPSF2	723.585	1.62262	0.218148	7.43816	1.021e-13	2.75033e-12	1.59851	up
ENSG00000197472	ZNF695	444.125	1.69607	0.44883	3.77886	0.000157545	0.000970029	1.59823	up
ENSG00000107338	SHB	122.902	1.67528	0.367157	4.56283	5.04684e-06	4.31101e-05	1.59814	up
ENSG00000201185	RNA5SP202	2.62805	4.28769	2.29289	1.86999	0.0614848		1.59752	-
ENSG00000131773	KHDRBS3	252.682	1.6689	0.371533	4.49194	7.05778e-06	5.86944e-05	1.59669	up
ENSG00000068097	HEATR6	165.571	1.64774	0.315505	5.22253	1.7649e-07	1.94394e-06	1.5965	up
ENSG00000131503	ANKHD1	119.111	1.69637	0.421155	4.02791	5.62756e-05	0.000384731	1.59627	up
ENSG00000112742	TTK	680.727	1.66296	0.36243	4.58838	4.46707e-06	3.8456e-05	1.59621	up
ENSG00000227782		2.25408	4.98649	3.26845	1.52565	0.127098		1.5961	-
ENSG00000177932	ZNF354C	50.7828	1.78705	0.628709	2.84242	0.00447729	0.0184316	1.59593	up
ENSG00000228057	SEC63P1	7.82725	2.16854	1.0292	2.10702	0.0351157	0.102745	1.5956	-
ENSG00000171466	ZNF562	71.9373	1.81022	0.664709	2.72332	0.00646286	0.0252185	1.59471	up
ENSG00000249736	LINC02242	2.79213	3.16578	2.28281	1.38679	0.165505		1.59371	-
ENSG00000117707	PROX1	57.4545	1.81422	0.675618	2.68528	0.007247	0.0278017	1.59354	up
ENSG00000218891	ZNF579	113.714	1.73833	0.509632	3.41095	0.000647365	0.00342258	1.59228	up
ENSG00000144357	UBR3	100.279	1.90087	0.779753	2.43779	0.0147775	0.0506183	1.59092	-
ENSG00000076650	GPATCH1	130.573	1.65111	0.348854	4.73296	2.21265e-06	2.01045e-05	1.59078	up
ENSG00000150764	DIXDC1	158.984	1.91408	0.778888	2.45745	0.0139926	0.0483952	1.59	up
ENSG00000165660	ABRAXAS2	167.887	1.66502	0.36052	4.61839	3.86736e-06	3.37623e-05	1.58975	up
ENSG00000138180	CEP55	514.011	1.63125	0.290796	5.60959	2.02802e-08	2.61938e-07	1.58886	up
ENSG00000204611	ZNF616	127.617	1.74036	0.554589	3.1381	0.00170045	0.00802119	1.58813	up
ENSG00000144028	SNRNP200	1238.34	1.61355	0.224539	7.18605	6.6694e-13	1.63042e-11	1.58807	up
ENSG00000178951	ZBTB7A	122.945	1.69607	0.456635	3.71427	0.000203789	0.00121623	1.58732	up
ENSG00000118620	ZNF430	258.285	1.63341	0.310546	5.2598	1.44214e-07	1.60809e-06	1.58661	up
ENSG00000229536	LINC02572	12.6151	3.75028	1.95597	1.91736	0.0551926	0.147116	1.58595	-
ENSG00000165632	TAF3	365.202	1.65936	0.379148	4.37655	1.20572e-05	9.55801e-05	1.58594	up
ENSG00000157680	DGKI	2.41288	3.3798	1.93366	1.74787	0.0804863		1.58563	-
ENSG00000164163	ABCE1	880.522	1.60176	0.183125	8.74682	2.19458e-18	1.07167e-16	1.58511	up
ENSG00000136492	BRIP1	158.254	1.64803	0.355278	4.63871	3.50586e-06	3.0851e-05	1.58508	up
ENSG00000153814	JAZF1	98.3168	1.88702	0.820754	2.29914	0.0214972	0.0688647	1.58493	-
ENSG00000131019	ULBP3	784.778	1.62995	0.305417	5.3368	9.46015e-08	1.08352e-06	1.5846	up
ENSG00000138081	FBXO11	169.955	1.6362	0.320102	5.11149	3.1963e-07	3.36715e-06	1.58443	up
ENSG00000133812	SBF2	164.668	1.63014	0.300905	5.41747	6.04479e-08	7.17629e-07	1.58395	up
ENSG00000170558	CDH2	808.715	1.62929	0.302304	5.38957	7.06277e-08	8.28069e-07	1.58331	up
ENSG00000152332	UHMK1	208.722	1.71472	0.517791	3.31161	0.000927612	0.00470836	1.58296	up
ENSG00000149311	ATM	239.586	1.62101	0.277583	5.83973	5.22847e-09	7.39898e-08	1.58286	up
ENSG00000179456	ZBTB18	70.5146	1.65011	0.377109	4.37567	1.2106e-05	9.58901e-05	1.58262	up
ENSG00000267565		2.54766	2.97036	2.00829	1.47905	0.139126		1.58261	-
ENSG00000172954	LCLAT1	444.62	1.63946	0.335268	4.89001	1.00831e-06	9.63415e-06	1.58256	up
ENSG00000182700	IGIP	5.03522	2.8705	1.92119	1.49413	0.135142	0.292567	1.58109	-
ENSG00000258441	LINC00641	47.7215	1.79525	0.715515	2.50904	0.012106	0.0428929	1.58107	up
ENSG00000227195	MIR663AHG	33.8525	2.43168	1.06339	2.28673	0.0222117	0.0708672	1.58089	-
ENSG00000253276	CCDC71L	127.514	1.88619	0.802298	2.35099	0.0187236	0.0613789	1.58082	-
ENSG00000286331		6.37612	4.65934	2.27795	2.04541	0.0408145	0.11593	1.58061	-
ENSG00000152192	POU4F1	193.116	1.62923	0.314999	5.17217	2.31389e-07	2.49728e-06	1.58042	up
ENSG00000127946	HIP1	542.637	1.61681	0.274185	5.89679	3.70646e-09	5.37341e-08	1.57961	up
ENSG00000127870	RNF6	200.374	1.62671	0.311637	5.2199	1.79021e-07	1.96963e-06	1.57939	up
ENSG00000151233	GXYLT1	376.314	1.65006	0.376896	4.37802	1.19764e-05	9.49779e-05	1.57931	up
ENSG00000203952	CCDC160	22.3326	1.7312	0.66287	2.61167	0.00901009	0.0335086	1.57917	up
ENSG00000166783	MARF1	143.711	1.65355	0.386244	4.28111	1.85959e-05	0.000140611	1.57837	up
ENSG00000188177	ZC3H6	268.512	1.62697	0.314034	5.18086	2.20859e-07	2.39015e-06	1.57834	up
ENSG00000255362	LINC02761	12.4388	2.06003	0.981432	2.099	0.0358166	0.10435	1.5783	-
ENSG00000184486	POU3F2	278.511	1.64701	0.370052	4.45075	8.55707e-06	6.98159e-05	1.57827	up
ENSG00000101343	CRNKL1	389.877	1.64084	0.352685	4.65242	3.28061e-06	2.90493e-05	1.57736	up
ENSG00000065060	UHRF1BP1	450.378	1.62303	0.304222	5.335	9.55442e-08	1.09368e-06	1.57651	up
ENSG00000166448	TMEM130	18.5576	2.64772	1.67816	1.57775	0.114623	0.258706	1.57626	-
ENSG00000058056	USP13	183.395	1.6082	0.257969	6.23408	4.5445e-10	7.65499e-09	1.57614	up
ENSG00000014138	POLA2	276.341	1.61958	0.294956	5.49093	3.99819e-08	4.92654e-07	1.57579	up
ENSG00000147606	SLC26A7	5.28095	5.66826	2.62208	2.16174			1.57568	-
ENSG00000100784	RPS6KA5	58.6357	1.84571	0.737729	2.50188	0.0123537	0.0436429	1.57538	up
ENSG00000121210	TMEM131L	150.012	1.65408	0.380498	4.34716	1.37915e-05	0.000107649	1.57478	up
ENSG00000172831	CES2	209.025	1.61855	0.304841	5.30949	1.09931e-07	1.24899e-06	1.57325	up
ENSG00000133019	CHRM3	159.429	1.67082	0.442693	3.77422	0.000160507	0.000985813	1.5727	up
ENSG00000091409	ITGA6	369.66	1.61473	0.290653	5.55554	2.7676e-08	3.49048e-07	1.57178	up
ENSG00000187605	TET3	89.4599	1.67825	0.463221	3.62299	0.000291212	0.00168375	1.57164	up
ENSG00000133083	DCLK1	73.98	1.88761	0.807826	2.33665	0.0194572	0.0633637	1.57142	-
ENSG00000196950	SLC39A10	642.321	1.61486	0.296099	5.4538	4.93049e-08	5.9778e-07	1.57133	up
ENSG00000198589	LRBA	255.336	1.61958	0.313445	5.16704	2.37828e-07	2.56121e-06	1.57063	up
ENSG00000240738	RPL6P22	6.48502	2.28245	1.30315	1.75148	0.0798625	0.19691	1.57025	-
ENSG00000065150	IPO5	4446.18	1.59344	0.216932	7.34536	2.05206e-13	5.32515e-12	1.57009	up
ENSG00000109685	NSD2	1188.16	1.59523	0.226901	7.03052	2.05772e-12	4.74928e-11	1.56944	up
ENSG00000123200	ZC3H13	966.477	1.64144	0.378099	4.34131	1.41639e-05	0.000110166	1.5693	up
ENSG00000197256	KANK2	199.261	1.62585	0.338811	4.79869	1.59707e-06	1.48864e-05	1.56909	up
ENSG00000140443	IGF1R	561.165	1.6073	0.276216	5.81901	5.91965e-09	8.30594e-08	1.56895	up
ENSG00000138735	PDE5A	55.7278	1.66826	0.449532	3.7111	0.000206361	0.00122971	1.56889	up
ENSG00000109171	SLAIN2	1208.19	1.59151	0.214507	7.41939	1.17659e-13	3.13536e-12	1.56878	up
ENSG00000104313	EYA1	3.58237	3.54868	2.32893	1.52374	0.127574	0.280657	1.56864	-
ENSG00000137497	NUMA1	272.945	1.61104	0.291662	5.52365	3.32026e-08	4.13211e-07	1.56843	up
ENSG00000119778	ATAD2B	99.6718	1.6698	0.4492	3.71727	0.000201388	0.00120372	1.56801	up
ENSG00000151779	NBAS	321.355	1.63957	0.371918	4.40842	1.04125e-05	8.34432e-05	1.56793	up
ENSG00000205269	TMEM170B	107.664	1.64672	0.404082	4.07521	4.59724e-05	0.00032082	1.56722	up
ENSG00000198900	TOP1	1122.73	1.5891	0.211246	7.5225	5.37368e-14	1.50691e-12	1.56704	up
ENSG00000198718	TOGARAM1	73.4647	1.70296	0.515656	3.30251	0.000958221	0.00484333	1.56614	up
ENSG00000120907	ADRA1A	64.1893	6.66372	3.30987	2.01328			1.56571	-
ENSG00000230364	RPL4P3	91.1638	1.8958	0.872851	2.17196	0.0298585	0.08987	1.56535	-
ENSG00000261351		57.5268	1.67124	0.459675	3.63571	0.000277217	0.00161111	1.56518	up
ENSG00000277235		5.43261	3.0087	1.75225	1.71705	0.0859708	0.208496	1.56472	-
ENSG00000135040	NAA35	375.27	1.5926	0.238849	6.66782	2.59633e-11	5.13209e-10	1.56465	up
ENSG00000102038	SMARCA1	288.131	1.59341	0.237776	6.70132	2.06551e-11	4.14481e-10	1.56458	up
ENSG00000055208	TAB2	299.613	1.64121	0.395725	4.14736	3.36333e-05	0.00024064	1.56454	up
ENSG00000198865	CCDC152	271.412	1.65582	0.420028	3.94217	8.07461e-05	0.000532913	1.56403	up
ENSG00000131375	CAPN7	203.701	1.65355	0.424435	3.89588	9.78424e-05	0.000634759	1.56378	up
ENSG00000286019	NOTCH2NLB	3.42409	2.77437	1.63005	1.70202	0.0887521	0.213647	1.56354	-
ENSG00000125257	ABCC4	181.752	1.60746	0.293747	5.47226	4.44321e-08	5.43101e-07	1.56353	up
ENSG00000011332	DPF1	280.567	1.63232	0.376538	4.33508	1.45707e-05	0.00011302	1.56335	up
ENSG00000039319	ZFYVE16	99.4757	1.6949	0.525405	3.22589	0.00125583	0.00614618	1.56273	up
ENSG00000135338	LCA5	67.7849	1.83548	0.738986	2.48378	0.0129996	0.0454469	1.56232	up
ENSG00000105926	PALS2	422.526	1.61994	0.343807	4.71177	2.4557e-06	2.2201e-05	1.5621	up
ENSG00000226053	LINC01776	2.45058	3.85207	2.52637	1.52475	0.127322		1.56188	-
ENSG00000196268	ZNF493	57.3248	1.75863	0.663153	2.65191	0.0080037	0.0302895	1.56148	up
ENSG00000114127	XRN1	179.755	1.61328	0.319309	5.05242	4.36252e-07	4.48374e-06	1.56124	up
ENSG00000272218		2.9469	3.3387	2.29283	1.45615	0.145352	0.308274	1.56121	-
ENSG00000225329	LHFPL3-AS2	6.94491	4.77446	2.04763	2.3317	0.0197166	0.0640611	1.56044	-
ENSG00000123983	ACSL3	832.771	1.59314	0.258918	6.1531	7.59851e-10	1.22344e-08	1.55988	up
ENSG00000255639		2.05109	3.71185	2.62551	1.41376	0.157431		1.55987	-
ENSG00000196110	ZNF699	49.9824	1.77361	0.667785	2.65596	0.00790835	0.0299677	1.55944	up
ENSG00000205628	LINC01446	161.948	2.28737	1.3	1.75952			1.55853	-
ENSG00000140450	ARRDC4	86.1582	1.6928	0.51925	3.26008	0.00111381	0.00553582	1.55806	up
ENSG00000139946	PELI2	225.378	1.59866	0.284763	5.61401	1.97687e-08	2.55999e-07	1.55799	up
ENSG00000225171	DUTP6	3.13578	2.75298	2.12692	1.29435	0.195545	0.38096	1.55778	-
ENSG00000126804	ZBTB1	217.446	1.61611	0.341398	4.7338	2.20353e-06	2.004e-05	1.55757	up
ENSG00000023445	BIRC3	7.53675	3.10121	1.79833	1.7245	0.0846182	0.205946	1.55742	-
ENSG00000185177	ZNF479	3.33064	3.87797	2.29693	1.68833	0.0913486	0.218502	1.55741	-
ENSG00000148842	CNNM2	170.714	1.62586	0.375693	4.32763	1.50725e-05	0.000116592	1.55725	up
ENSG00000156735	BAG4	479.973	1.61486	0.346572	4.65953	3.16933e-06	2.81393e-05	1.5567	up
ENSG00000076321	KLHL20	163.271	1.71358	0.565168	3.03198	0.00242951	0.0108754	1.55657	up
ENSG00000198963	RORB	19.6539	1.8617	0.841792	2.21159	0.0269949	0.0830518	1.55653	-
ENSG00000147180	ZNF711	118.58	1.81647	0.73112	2.48451	0.0129731	0.0453784	1.5564	up
ENSG00000064726	BTBD1	410.03	1.58687	0.250039	6.3465	2.20265e-10	3.85776e-09	1.55615	up
ENSG00000135801	TAF5L	260.303	1.61511	0.34807	4.64019	3.48091e-06	3.0645e-05	1.55609	up
ENSG00000134086	VHL	996.785	1.59583	0.285636	5.58694	2.31103e-08	2.95222e-07	1.55559	up
ENSG00000143674	MAP3K21	187.151	1.63588	0.404761	4.0416	5.30869e-05	0.000365325	1.55539	up
ENSG00000073050	XRCC1	540.885	1.59666	0.289272	5.51957	3.39839e-08	4.22158e-07	1.55458	up
ENSG00000275632		9.73372	1.8627	0.843923	2.20719	0.0273005	0.0837604	1.55456	-
ENSG00000157404	KIT	64.7826	1.69158	0.519181	3.25816	0.00112135	0.00556216	1.5538	up
ENSG00000124177	CHD6	357.501	1.6251	0.37589	4.32334	1.53683e-05	0.000118511	1.55367	up
ENSG00000075945	KIFAP3	195.761	1.62709	0.38948	4.1776	2.94606e-05	0.000213092	1.55203	up
ENSG00000127603	MACF1	240.712	1.62496	0.385467	4.21555	2.49173e-05	0.000182832	1.5518	up
ENSG00000138685	FGF2	118.695	1.64013	0.417287	3.93047	8.47794e-05	0.000557122	1.55141	up
ENSG00000206195	DUXAP8	43.8656	1.74949	0.655625	2.66843	0.00762073	0.0290108	1.5505	up
ENSG00000092421	SEMA6A	1055.25	1.58598	0.268314	5.91093	3.40188e-09	4.96289e-08	1.55032	up
ENSG00000224559	LINC01087	12.2609	3.53104	1.92787	1.83158	0.0670144	0.171718	1.55	-
ENSG00000175893	ZDHHC21	76.9276	1.68606	0.55748	3.02442	0.00249108	0.011096	1.54971	up
ENSG00000114853	ZBTB47	9.78845	2.93886	1.79685	1.63556	0.101931	0.237289	1.54913	-
ENSG00000271254		11.2256	2.3178	1.24339	1.86409	0.0623089	0.162033	1.54869	-
ENSG00000269825		19.7013	1.80812	0.867855	2.08343	0.0372118	0.107561	1.54859	-
ENSG00000271971		8.40874	2.98956	1.76759	1.69132	0.090776	0.217489	1.5479	-
ENSG00000077157	PPP1R12B	75.9988	1.78457	0.695322	2.56654	0.0102719	0.0374015	1.54778	up
ENSG00000178075	GRAMD1C	61.4705	1.67023	0.499731	3.34226	0.000831003	0.00426715	1.54773	up
ENSG00000240915		2.67017	4.89937	2.85073	1.71864	0.0856801		1.5477	-
ENSG00000183196	CHST6	73.0621	1.70005	0.543613	3.12731	0.00176411	0.00826254	1.54763	up
ENSG00000215311	NPM1P12	25.6795	2.05105	1.0313	1.98881	0.0467218	0.128931	1.5472	-
ENSG00000180773	SLC36A4	199.499	1.82811	0.784226	2.3311	0.019748	0.0641525	1.54642	-
ENSG00000156011	PSD3	211.63	1.60892	0.358201	4.49168	7.0662e-06	5.87398e-05	1.54583	up
ENSG00000121274	TENT4B	384.085	1.58427	0.286292	5.53375	3.1346e-08	3.92092e-07	1.54437	up
ENSG00000202031	SNORD38A	4.4907	2.73116	1.92404	1.41949	0.155756	0.324031	1.54415	-
ENSG00000154310	TNIK	143.28	1.65417	0.475545	3.47847	0.000504294	0.00273846	1.54385	up
ENSG00000147459	DOCK5	67.7534	1.66874	0.506846	3.2924	0.000993374	0.00500118	1.54358	up
ENSG00000237892	KLF7-IT1	2.04399	3.70497	2.6429	1.40186	0.160958		1.54346	-
ENSG00000106086	PLEKHA8	145.867	1.65944	0.491942	3.37324	0.000742894	0.00386274	1.54336	up
ENSG00000137177	KIF13A	137.481	1.65096	0.462664	3.56837	0.000359206	0.00203243	1.54257	up
ENSG00000100227	POLDIP3	29.1889	1.83679	0.705532	2.60341	0.00923022	0.0341861	1.54161	up
ENSG00000143067	ZNF697	29.1254	1.91669	0.870136	2.20275	0.0276121	0.0845333	1.54118	-
ENSG00000273271		5.13198	3.47885	2.06398	1.6855	0.0918917	0.219299	1.54106	-
ENSG00000118689	FOXO3	525.673	1.57636	0.266964	5.90476	3.53156e-09	5.13319e-08	1.54082	up
ENSG00000171206	TRIM8	204.975	1.60796	0.37658	4.26991	1.95551e-05	0.000146967	1.54041	up
ENSG00000272263		4.1718	5.25032	2.57231	2.04109	0.0412416	0.116834	1.53974	-
ENSG00000162402	USP24	172.22	1.61086	0.384036	4.19455	2.73414e-05	0.000198852	1.53879	up
ENSG00000177888	ZBTB41	45.4179	2.12051	1.13196	1.87331	0.061026	0.159365	1.53836	-
ENSG00000115808	STRN	155.575	1.59173	0.332786	4.78303	1.7267e-06	1.5982e-05	1.53781	up
ENSG00000148154	UGCG	297.214	1.60171	0.362618	4.41707	1.00046e-05	8.05321e-05	1.53779	up
ENSG00000109654	TRIM2	416.086	1.60484	0.372993	4.30261	1.68797e-05	0.000129211	1.53765	up
ENSG00000131626	PPFIA1	314.623	1.61309	0.389859	4.13764	3.50896e-05	0.000250067	1.53729	up
ENSG00000272627		2.14526	4.68567	2.93587	1.59601	0.110487		1.53689	-
ENSG00000125885	MCM8	315.866	1.56151	0.228676	6.82846	8.58296e-12	1.82777e-10	1.53596	up
ENSG00000289613		4.18293	2.70466	2.04038	1.32556	0.184984	0.365725	1.53547	-
ENSG00000164221	CCDC112	572.119	1.59305	0.34171	4.66201	3.13142e-06	2.78401e-05	1.53524	up
ENSG00000119596	YLPM1	339.091	1.62323	0.42535	3.81622	0.000135512	0.000845125	1.53408	up
ENSG00000166004	CEP295	227.046	1.60907	0.397914	4.04376	5.2601e-05	0.000362359	1.53328	up
ENSG00000286208		8.69423	2.10784	1.26529	1.66589	0.0957348	0.226415	1.53325	-
ENSG00000079841	RIMS1	12.9764	2.7444	1.56936	1.74874	0.0803353	0.197919	1.53307	-
ENSG00000110066	KMT5B	465.19	1.55649	0.222141	7.00675	2.43919e-12	5.55217e-11	1.53276	up
ENSG00000143079	CTTNBP2NL	89.5078	1.68227	0.565643	2.97408	0.00293866	0.0128217	1.5324	up
ENSG00000083799	CYLD	114.265	1.65258	0.493897	3.34599	0.00081988	0.00421877	1.53236	up
ENSG00000136731	UGGT1	542.684	1.55106	0.198087	7.83016	4.8724e-15	1.56818e-13	1.53192	up
ENSG00000225422	RBMS1P1	7.47203	2.31956	1.31381	1.76552	0.0774767	0.192391	1.53163	-
ENSG00000132549	VPS13B	83.7958	1.71237	0.618855	2.767	0.00565745	0.0224914	1.53076	up
ENSG00000109787	KLF3	171.65	1.59396	0.357444	4.45933	8.2217e-06	6.73011e-05	1.53061	up
ENSG00000101849	TBL1X	961.799	1.55241	0.212486	7.30595	2.75322e-13	7.07064e-12	1.53033	up
ENSG00000123836	PFKFB2	55.2742	1.65175	0.507625	3.25388	0.0011384	0.00563823	1.53031	up
ENSG00000239247	RN7SL589P	4.57893	3.58148	2.20175	1.62665	0.103811	0.240438	1.52975	-
ENSG00000196584	XRCC2	384.154	1.5711	0.296692	5.2954	1.18758e-07	1.3416e-06	1.5297	up
ENSG00000137807	KIF23	1158.34	1.53994	0.145973	10.5494	5.11103e-26	5.38996e-24	1.52955	up
ENSG00000139352	ASCL1	15.2803	3.31071	1.9043	1.73854	0.0821152	0.201346	1.52933	-
ENSG00000198765	SYCP1	2.24537	4.98199	3.35466	1.4851	0.137518		1.52887	-
ENSG00000131127	ZNF141	423.43	1.59343	0.372029	4.28308	1.84327e-05	0.000139574	1.52838	up
ENSG00000157540	DYRK1A	232.518	1.61079	0.408861	3.93969	8.15866e-05	0.000537839	1.52835	up
ENSG00000065883	CDK13	180.339	1.61502	0.42164	3.83033	0.000127973	0.000802404	1.52814	up
ENSG00000137203	TFAP2A	114.286	1.62969	0.463243	3.51801	0.000434797	0.00240521	1.52783	up
ENSG00000134313	KIDINS220	480.596	1.58145	0.336686	4.69709	2.6389e-06	2.37382e-05	1.52636	up
ENSG00000259959		27.1256	1.94153	0.962248	2.0177	0.0436225	0.122207	1.52615	-
ENSG00000111834	RSPH4A	4.12003	3.7811	2.72536	1.38737	0.165328	0.337921	1.52593	-
ENSG00000141664	ZCCHC2	147.423	1.69484	0.590483	2.87026	0.0041013	0.0170933	1.52571	up
ENSG00000131437	KIF3A	246.853	1.60452	0.403164	3.97981	6.89715e-05	0.00046119	1.52539	up
ENSG00000269067	ZNF728	42.2252	1.94071	0.959331	2.02299	0.0430747	0.121152	1.52482	-
ENSG00000128881	TTBK2	142.084	1.65205	0.512507	3.22347	0.00126646	0.00618596	1.52453	up
ENSG00000071537	SEL1L	337.102	1.58752	0.359693	4.41354	1.01696e-05	8.17277e-05	1.52437	up
ENSG00000090889	KIF4A	744.686	1.55166	0.234044	6.62978	3.36187e-11	6.54096e-10	1.52414	up
ENSG00000131149	GSE1	872.685	1.5384	0.17165	8.96243	3.17614e-19	1.67474e-17	1.52381	up
ENSG00000104164	BLOC1S6	846.954	1.5732	0.322524	4.87779	1.0728e-06	1.02109e-05	1.52379	up
ENSG00000157107	FCHO2	92.8543	1.60911	0.42756	3.76348	0.000167566	0.00102189	1.52259	up
ENSG00000169018	FEM1B	900.636	1.57418	0.327661	4.80431	1.55287e-06	1.45017e-05	1.52254	up
ENSG00000258548	LINC00645	3.49985	2.72846	1.96473	1.38872	0.164918	0.337357	1.52235	-
ENSG00000122591	FAM126A	607.023	1.55486	0.264082	5.88781	3.91357e-09	5.63883e-08	1.52097	up
ENSG00000163681	SLMAP	331.382	1.58219	0.355646	4.44877	8.63625e-06	7.04039e-05	1.52088	up
ENSG00000196497	IPO4	50.2386	1.64198	0.511153	3.21231	0.00131674	0.00639688	1.52087	up
ENSG00000286540		3.2396	2.79503	1.77148	1.5778	0.114612	0.258706	1.52048	-
ENSG00000154447	SH3RF1	92.383	1.67063	0.563946	2.96239	0.00305256	0.0132371	1.52006	up
ENSG00000224897	POT1-AS1	11.6625	1.89133	1.04789	1.80489	0.0710914	0.179771	1.51931	-
ENSG00000228915	OR7E128P	3.72098	3.09349	2.38789	1.29549	0.195152	0.380404	1.51873	-
ENSG00000213079	SCAF8	189.267	1.56654	0.319805	4.89843	9.66038e-07	9.25697e-06	1.51788	up
ENSG00000121931	LRIF1	280.054	1.60925	0.433119	3.71549	0.000202809	0.0012114	1.51737	up
ENSG00000242779	ZNF702P	57.5501	1.85302	0.881734	2.10157	0.0355913	0.103831	1.51736	-
ENSG00000153936	HS2ST1	330.233	1.55618	0.286338	5.43477	5.48672e-08	6.58075e-07	1.51729	up
ENSG00000111727	HCFC2	35.5329	1.70918	0.667989	2.55869	0.0105068	0.0380958	1.51713	up
ENSG00000173960	UBXN2A	861.306	1.55273	0.279368	5.55802	2.72849e-08	3.44335e-07	1.51603	up
ENSG00000159086	PAXBP1	110.046	1.6077	0.438516	3.66623	0.000246156	0.00144773	1.51488	up
ENSG00000120784	ZFP30	73.8674	1.72581	0.666415	2.5897	0.00960604	0.035347	1.51445	up
ENSG00000148840	PPRC1	417.036	1.58258	0.374393	4.22707	2.36757e-05	0.000174691	1.5144	up
ENSG00000182308	DCAF4L1	3.3715	3.12672	2.13154	1.46688	0.142408	0.30388	1.51424	-
ENSG00000178175	ZNF366	5.30888	2.55916	1.60089	1.59859	0.109912	0.250951	1.5141	-
ENSG00000115306	SPTBN1	564.571	1.54343	0.24602	6.27359	3.52821e-10	6.04584e-09	1.51266	up
ENSG00000064042	LIMCH1	350.117	1.55967	0.316825	4.92282	8.53039e-07	8.24993e-06	1.51258	up
ENSG00000170471	RALGAPB	139.64	1.57615	0.365915	4.30741	1.6518e-05	0.000126834	1.51253	up
ENSG00000260908		10.4446	2.59034	1.8272	1.41765			1.51211	-
ENSG00000165650	PDZD8	723.874	1.55533	0.301099	5.16551	2.39789e-07	2.57952e-06	1.51177	up
ENSG00000278704		15.4333	1.90242	0.961349	1.9789	0.0478267	0.131319	1.51169	-
ENSG00000101577	LPIN2	97.3312	1.79581	0.775806	2.31477	0.0206256	0.0665998	1.51156	-
ENSG00000196284	SUPT3H	384.61	1.55584	0.308752	5.03912	4.67677e-07	4.75739e-06	1.51153	up
ENSG00000119314	PTBP3	561.937	1.53382	0.214488	7.15108	8.6097e-13	2.08166e-11	1.5114	up
ENSG00000157021	CIBAR1P1	28.6206	1.73804	0.695991	2.49721	0.0125174	0.0440878	1.51121	up
ENSG00000121749	TBC1D15	264.511	1.5459	0.269277	5.74094	9.41538e-09	1.28826e-07	1.51114	up
ENSG00000178104	PDE4DIP	184.484	1.58849	0.403715	3.93467	8.33095e-05	0.000548553	1.51106	up
ENSG00000147003	CLTRN	25.5606	1.92869	1.01046	1.90872	0.0562982	0.14946	1.51074	-
ENSG00000117477	CCDC181	237.142	1.53633	0.245012	6.27044	3.60025e-10	6.14803e-09	1.51071	up
ENSG00000198399	ITSN2	322.454	1.56498	0.336199	4.65493	3.24089e-06	2.87232e-05	1.51027	up
ENSG00000125827	TMX4	498.593	1.53957	0.247252	6.2267	4.76348e-10	7.97641e-09	1.50997	up
ENSG00000285458		39.0212	1.57278	0.454669	3.45916	0.000541855	0.00291766	1.50892	up
ENSG00000233757		104.384	1.63215	0.505143	3.23107	0.00123326	0.00604615	1.50845	up
ENSG00000015171	ZMYND11	105.448	1.62201	0.487038	3.33035	0.000867356	0.00443658	1.50781	up
ENSG00000155111	CDK19	105.568	1.60444	0.450117	3.5645	0.000364551	0.00205797	1.50778	up
ENSG00000177707	NECTIN3	124.107	1.62564	0.502451	3.23543	0.00121461	0.00596649	1.50712	up
ENSG00000128710	HOXD10	79.0435	1.87708	0.891171	2.10631	0.0351773	0.102911	1.50708	-
ENSG00000152818	UTRN	958.523	1.53184	0.227759	6.72569	1.7476e-11	3.55727e-10	1.50675	up
ENSG00000180769	WDFY3-AS2	75.3408	2.006	1.03721	1.93404	0.0531085	0.142654	1.50647	-
ENSG00000105821	DNAJC2	2002.39	1.54985	0.304499	5.08984	3.58359e-07	3.74136e-06	1.50588	up
ENSG00000078043	PIAS2	301.762	1.54898	0.305608	5.06853	4.00897e-07	4.14832e-06	1.50549	up
ENSG00000049323	LTBP1	101.312	1.68216	0.586346	2.86888	0.00411929	0.0171502	1.50525	up
ENSG00000183495	EP400	297.016	1.53919	0.267071	5.76323	8.25187e-09	1.1377e-07	1.50453	up
ENSG00000083642	PDS5B	467.815	1.54586	0.295651	5.22867	1.70731e-07	1.88574e-06	1.50387	up
ENSG00000125686	MED1	587.121	1.56701	0.364821	4.29528	1.74471e-05	0.000132938	1.50315	up
ENSG00000289943		8.32235	2.2147	1.51413	1.46269	0.143553	0.305407	1.50214	-
ENSG00000055917	PUM2	481.909	1.55743	0.342443	4.548	5.41591e-06	4.59615e-05	1.5016	up
ENSG00000223547	ZNF844	14.2092	1.91329	1.02771	1.8617	0.0626451	0.162693	1.49999	-
ENSG00000229361	UBTFL7	5.53396	1.95452	1.26315	1.54733	0.121783	0.271137	1.49993	-
ENSG00000162702	ZNF281	372.555	1.5694	0.385219	4.07405	4.62019e-05	0.000322194	1.49969	up
ENSG00000154217	PITPNC1	130.765	1.56623	0.359237	4.35986	1.30145e-05	0.000102107	1.4995	up
ENSG00000047457	CP	70.5006	1.61867	0.504303	3.20973	0.00132862	0.00644985	1.49923	up
ENSG00000106624	AEBP1	370.145	1.54873	0.315193	4.9136	8.94173e-07	8.63091e-06	1.49912	up
ENSG00000196511	TPK1	88.7283	2.44257	1.509	1.61867	0.105519	0.243399	1.49844	-
ENSG00000153015	CWC27	1296.46	1.51435	0.185184	8.17751	2.89761e-16	1.08597e-14	1.49815	up
ENSG00000147133	TAF1	172.695	1.55861	0.349913	4.45427	8.41806e-06	6.87666e-05	1.49807	up
ENSG00000254604		5.062	3.99121	2.14947	1.85684	0.0633344	0.164025	1.49794	-
ENSG00000050405	LIMA1	233.886	1.55513	0.348301	4.46491	8.01032e-06	6.58154e-05	1.49777	up
ENSG00000125772	GPCPD1	328.173	1.53694	0.283399	5.42325	5.85263e-08	6.98581e-07	1.4975	up
ENSG00000204685	STARD7-AS1	24.1089	1.85515	0.892106	2.07951	0.0375702	0.108344	1.49744	-
ENSG00000145703	IQGAP2	495.065	1.54084	0.297152	5.18538	2.15578e-07	2.33938e-06	1.49734	up
ENSG00000180182	MED14	227.294	1.64226	0.553127	2.96904	0.00298731	0.0129895	1.49726	up
ENSG00000112394	SLC16A10	401.125	1.55036	0.334868	4.62975	3.66114e-06	3.20326e-05	1.49675	up
ENSG00000188315	C3orf62	46.4223	2.47907	1.39223	1.78064			1.49655	-
ENSG00000234206		5.43707	2.98274	1.80958	1.6483	0.0992902	0.232907	1.49617	-
ENSG00000046889	PREX2	84.5916	1.76604	0.758099	2.32957	0.019829	0.0643805	1.49578	-
ENSG00000012048	BRCA1	810.888	1.52358	0.243331	6.26135	3.81657e-10	6.48833e-09	1.49553	up
ENSG00000184194	GPR173	14.8374	1.96401	1.11547	1.7607	0.078289	0.19402	1.49551	-
ENSG00000126858	RHOT1	241.923	1.55385	0.349026	4.45197	8.50873e-06	6.94501e-05	1.4952	up
ENSG00000147027	TMEM47	177.961	1.58545	0.438801	3.61315	0.000302498	0.00174341	1.49508	up
ENSG00000120071	KANSL1	221.419	1.55717	0.353085	4.41016	1.03292e-05	8.28561e-05	1.495	up
ENSG00000147231	RADX	113.847	1.68523	0.621161	2.71304	0.00666687	0.025907	1.49385	up
ENSG00000127947	PTPN12	241.517	1.56471	0.38956	4.01661	5.90407e-05	0.000401558	1.49322	up
ENSG00000204217	BMPR2	295.227	1.5985	0.472829	3.38072	0.000722957	0.00376896	1.49285	up
ENSG00000230606	LINC02969	2.35327	3.05057	2.44436	1.248	0.212029		1.49241	-
ENSG00000141424	SLC39A6	960.561	1.53453	0.298304	5.14418	2.68696e-07	2.85946e-06	1.49233	up
ENSG00000188786	MTF1	83.139	1.58379	0.446465	3.5474	0.000389053	0.00218015	1.49221	up
ENSG00000254469	XNDC1N	25.9505	2.00499	1.04926	1.91086	0.0560231	0.148828	1.4922	-
ENSG00000119004	CYP20A1	394.077	1.59126	0.462535	3.4403	0.000581063	0.00310182	1.492	up
ENSG00000133639	BTG1	795.488	1.52681	0.270583	5.64269	1.67413e-08	2.1981e-07	1.49163	up
ENSG00000152133	GPATCH11	293.393	1.57935	0.434587	3.63414	0.000278914	0.00161908	1.49127	up
ENSG00000134369	NAV1	69.6433	1.61977	0.522546	3.09977	0.00193674	0.00896515	1.49091	up
ENSG00000172123	SLFN12	28.6181	2.01597	1.03962	1.93915	0.0524834	0.141282	1.49079	-
ENSG00000012983	MAP4K5	300.992	1.53572	0.307806	4.98927	6.06091e-07	6.00218e-06	1.49068	up
ENSG00000157106	SMG1	211.57	1.57891	0.432693	3.64903	0.000263237	0.00153724	1.49063	up
ENSG00000165121		28.9891	1.8517	0.879922	2.10439	0.0353447	0.1033	1.49048	-
ENSG00000079102	RUNX1T1	80.5407	1.62167	0.490413	3.30675	0.000943852	0.00477733	1.49048	up
ENSG00000165733	BMS1	559.495	1.51861	0.243384	6.23956	4.38795e-10	7.40387e-09	1.49029	up
ENSG00000162437	RAVER2	104.372	1.5572	0.37877	4.11121	3.93584e-05	0.000278487	1.48928	up
ENSG00000288107		7.28908	1.94279	1.09812	1.76921	0.0768594	0.19117	1.4877	-
ENSG00000135049	AGTPBP1	323.956	1.50766	0.206929	7.28587	3.19592e-13	8.09225e-12	1.48748	up
ENSG00000155657	TTN	19.7101	1.86196	0.908143	2.05029	0.0403359	0.114817	1.4874	-
ENSG00000125484	GTF3C4	353.656	1.55446	0.377397	4.11889	3.80699e-05	0.000269851	1.48733	up
ENSG00000213316	LTC4S	8.10229	2.12251	1.36261	1.55768	0.119308	0.266946	1.4865	-
ENSG00000135976	ANKRD36	77.2095	1.68816	0.673115	2.50799	0.0121421	0.0429872	1.48639	up
ENSG00000164985	PSIP1	2006.1	1.51333	0.245885	6.15461	7.52622e-10	1.21319e-08	1.48469	up
ENSG00000165061	ZMAT4	14.8718	1.88954	1.06961	1.76658	0.0772992	0.192023	1.48417	-
ENSG00000106346	USP42	304.31	1.53696	0.335316	4.58361	4.57016e-06	3.92413e-05	1.48353	up
ENSG00000111530	CAND1	804.3	1.50294	0.206985	7.2611	3.83954e-13	9.63579e-12	1.48285	up
ENSG00000239407		12.9962	2.59041	1.7595	1.47224	0.140956	0.301596	1.48219	-
ENSG00000136861	CDK5RAP2	647.733	1.51578	0.265399	5.71134	1.12093e-08	1.50771e-07	1.48204	up
ENSG00000136108	CKAP2	903.516	1.497	0.180663	8.28612	1.17002e-16	4.57532e-15	1.48178	up
ENSG00000134748	PRPF38A	1350.38	1.50617	0.232374	6.48167	9.07134e-11	1.67145e-09	1.48111	up
ENSG00000196466	ZNF799	30.0671	1.96611	0.98086	2.00448	0.0450187	0.125128	1.48053	-
ENSG00000130158	DOCK6	151.373	1.59999	0.506422	3.15939	0.00158099	0.0075348	1.48051	up
ENSG00000171763	SPATA5L1	157.617	1.5481	0.372535	4.15557	3.24473e-05	0.000232827	1.4805	up
ENSG00000288982		1.6979	4.08928	2.58983	1.57898	0.114342		1.47993	-
ENSG00000069702	TGFBR3	95.1536	1.87095	0.913276	2.04862	0.0404995	0.1152	1.47991	-
ENSG00000140396	NCOA2	135.285	1.52541	0.31019	4.91767	8.75798e-07	8.46178e-06	1.47976	up
ENSG00000070269	TMEM260	113.97	1.57921	0.458139	3.44702	0.000566814	0.00303392	1.47957	up
ENSG00000186951	PPARA	85.0081	1.61737	0.536168	3.01655	0.00255672	0.0113603	1.47927	up
ENSG00000165997	ARL5B	323.649	1.55116	0.395262	3.9244	8.69479e-05	0.000570804	1.47904	up
ENSG00000177119	ANO6	226.735	1.51335	0.27094	5.58556	2.32947e-08	2.97386e-07	1.47871	up
ENSG00000114999	TTL	428.047	1.53743	0.355165	4.32879	1.49934e-05	0.000116026	1.47811	up
ENSG00000138375	SMARCAL1	188.716	1.69764	0.682344	2.48796	0.0128479	0.045028	1.47761	up
ENSG00000213940		2.62848	2.94874	1.7023	1.73221	0.0832353		1.47753	-
ENSG00000233928		40.9927	1.84128	0.902233	2.04081	0.0412702	0.116889	1.47663	-
ENSG00000138448	ITGAV	274.82	1.51515	0.285556	5.30596	1.12082e-07	1.27125e-06	1.47632	up
ENSG00000137760	ALKBH8	90.8686	1.95744	1.01853	1.92183	0.0546274	0.145947	1.47613	-
ENSG00000196712	NF1	338.195	1.52434	0.322702	4.72369	2.31603e-06	2.09861e-05	1.47493	up
ENSG00000272791		7.52861	1.91099	1.1371	1.68058	0.0928444	0.221162	1.47458	-
ENSG00000289357		123.404	1.5893	0.486838	3.26454	0.00109642	0.00545759	1.47378	up
ENSG00000272356		13.5683	1.73499	0.886893	1.95626	0.0504351	0.136845	1.47348	-
ENSG00000004700	RECQL	226.039	1.5521	0.414066	3.74844	0.000177939	0.00107819	1.47302	up
ENSG00000253729	PRKDC	2042.24	1.49034	0.192306	7.74981	9.20326e-15	2.86893e-13	1.47297	up
ENSG00000258378		2.89452	3.47295	2.09663	1.65645	0.0976315	0.229804	1.47263	-
ENSG00000250067	YJEFN3	31.7044	1.67663	0.646916	2.59172	0.00954975	0.0351594	1.47257	up
ENSG00000198944	SOWAHA	33.0514	1.7947	0.825695	2.17356	0.0297382	0.0896305	1.4725	-
ENSG00000070882	OSBPL3	134.943	1.56708	0.446505	3.50966	0.000448682	0.00247461	1.47249	up
ENSG00000188559	RALGAPA2	80.1755	1.75875	0.793042	2.21772	0.026574	0.0820068	1.47232	-
ENSG00000157193	LRP8	133.657	1.55828	0.4253	3.66395	0.000248352	0.00145848	1.47215	up
ENSG00000196199	MPHOSPH8	1146.63	1.49887	0.239239	6.26513	3.72509e-10	6.34482e-09	1.47208	up
ENSG00000078403	MLLT10	413.249	1.4906	0.200431	7.43701	1.02991e-13	2.77056e-12	1.47189	up
ENSG00000259259	NPM1P42	4.30532	2.44526	1.50724	1.62234	0.10473	0.242029	1.47157	-
ENSG00000060237	WNK1	702.202	1.50937	0.284851	5.29878	1.16576e-07	1.32071e-06	1.47105	up
ENSG00000258733	LINC02328	6.19529	2.44724	1.54047	1.58863	0.112143	0.254628	1.47077	-
ENSG00000069431	ABCC9	3.00553	3.21742	2.41352	1.33308	0.182505	0.362292	1.47058	-
ENSG00000095015	MAP3K1	110.762	1.60309	0.514248	3.11735	0.00182483	0.00850873	1.47023	up
ENSG00000078687	TNRC6C	125.457	1.56986	0.447368	3.5091	0.000449632	0.00247829	1.46975	up
ENSG00000118407	FILIP1	63.5331	1.53833	0.400198	3.84391	0.000121087	0.000764303	1.46955	up
ENSG00000154175	ABI3BP	2.64928	4.4956	2.50416	1.79525	0.0726132		1.46908	-
ENSG00000270953		2.74793	4.02928	2.65583	1.51714	0.12923		1.46862	-
ENSG00000279148		5.83515	2.70161	1.7071	1.58258	0.113518	0.256832	1.46861	-
ENSG00000111912	NCOA7	289.971	1.53332	0.374731	4.09178	4.28073e-05	0.000300211	1.46848	up
ENSG00000261087	ZNNT1	11.7487	2.02218	1.27489	1.58616	0.112702	0.25548	1.46833	-
ENSG00000178445	GLDC	254.889	1.61271	0.442519	3.64439	0.000268028	0.00156338	1.46814	up
ENSG00000181904	C5orf24	439.446	1.52112	0.340714	4.46449	8.02587e-06	6.59159e-05	1.46775	up
ENSG00000279696		6.0631	2.60144	1.83115	1.42066	0.155415	0.323545	1.46719	-
ENSG00000127152	BCL11B	83.9029	1.64343	0.597666	2.74975	0.00596407	0.0235592	1.46705	up
ENSG00000255725	TDGP1	10.5094	1.81172	0.893182	2.02839	0.0425209	0.119866	1.46699	-
ENSG00000147526	TACC1	299.483	1.51665	0.330747	4.58553	4.52839e-06	3.89501e-05	1.46554	up
ENSG00000174231	PRPF8	1089.78	1.49099	0.23483	6.34925	2.16371e-10	3.7929e-09	1.46553	up
ENSG00000182489	XKRX	6.29143	2.89692	2.15073	1.34695	0.177997	0.356262	1.46525	-
ENSG00000083544	TDRD3	313.001	1.65658	0.644119	2.57185	0.0101158	0.0368688	1.4645	up
ENSG00000126787	DLGAP5	1718.84	1.51612	0.332993	4.553	5.28872e-06	4.50018e-05	1.4643	up
ENSG00000116406	EDEM3	132.675	1.52288	0.360869	4.22005	2.44253e-05	0.00017982	1.46372	up
ENSG00000236111	RPL6P1	30.4536	1.54098	0.476764	3.23216	0.00122859	0.00602773	1.46363	up
ENSG00000180370	PAK2	778.82	1.49015	0.240195	6.20392	5.50727e-10	9.13701e-09	1.46344	up
ENSG00000100815	TRIP11	385.49	1.49241	0.25516	5.8489	4.9482e-09	7.02743e-08	1.46333	up
ENSG00000111581	NUP107	877.794	1.4979	0.27653	5.41676	6.06898e-08	7.2007e-07	1.46199	up
ENSG00000164031	DNAJB14	184.019	1.55834	0.459599	3.39066	0.000697238	0.00365603	1.46194	up
ENSG00000280205		2.20889	4.78593	3.1061	1.54082	0.123361		1.4619	-
ENSG00000138823	MTTP	17.0692	2.26514	1.25735	1.80151	0.0716225	0.18089	1.46136	-
ENSG00000243144	LINC02932	1.77137	4.2266	2.77407	1.52361	0.127606		1.46066	-
ENSG00000159267	HLCS	101.185	1.53932	0.399792	3.8503	0.000117972	0.000747973	1.46062	up
ENSG00000165591	FAAH2	2.76058	3.42424	2.73728	1.25097	0.210946		1.46053	-
ENSG00000259594		8.67608	2.22652	1.40347	1.58644	0.112639	0.255367	1.45979	-
ENSG00000271524	BNIP3P17	2.79894	3.05066	2.16151	1.41136	0.158139		1.45907	-
ENSG00000188763	FZD9	49.2564	1.67447	0.716219	2.33793	0.0193907	0.0632093	1.45906	-
ENSG00000104290	FZD3	461.956	1.50448	0.316164	4.75855	1.94987e-06	1.78642e-05	1.45897	up
ENSG00000013375	PGM3	389.574	1.48319	0.235487	6.2984	3.00728e-10	5.19811e-09	1.45821	up
ENSG00000229704	EIF2S2P2	2.66534	3.22607	1.91254	1.6868	0.091642		1.45789	-
ENSG00000024526	DEPDC1	581.058	1.48816	0.259145	5.74258	9.32454e-09	1.27671e-07	1.45745	up
ENSG00000112305	SMAP1	453.917	1.48616	0.252404	5.888	3.90897e-09	5.6363e-08	1.45708	up
ENSG00000242086	MUC20-OT1	96.6472	1.58315	0.532789	2.97143	0.00296412	0.0129129	1.45662	up
ENSG00000145819	ARHGAP26	56.9964	1.807	0.837885	2.15662	0.0310352	0.0927494	1.45659	-
ENSG00000048649	RSF1	1493.03	1.48853	0.268966	5.53425	3.12554e-08	3.91206e-07	1.4552	up
ENSG00000197647	ZNF433	49.3717	1.63472	0.622861	2.62454	0.00867661	0.0324571	1.45502	up
ENSG00000188831	DPPA3P2	3.4191	2.17024	1.73827	1.24851	0.211845	0.403463	1.45452	-
ENSG00000166963	MAP1A	45.149	1.65957	0.696712	2.382	0.0172191	0.0573778	1.45395	-
ENSG00000172292	CERS6	99.9698	1.5493	0.451876	3.42859	0.00060672	0.00322143	1.45383	up
ENSG00000167981	ZNF597	12.7473	2.38413	1.45246	1.64144	0.100706	0.235225	1.45333	-
ENSG00000128585	MKLN1	351.066	1.50926	0.350945	4.30054	1.70381e-05	0.000130163	1.4532	up
ENSG00000151458	ANKRD50	120.705	1.71925	0.754011	2.28014	0.0225994	0.0719191	1.45318	-
ENSG00000107105	ELAVL2	209.29	1.4874	0.280872	5.29564	1.18599e-07	1.34124e-06	1.45232	up
ENSG00000139629	GALNT6	161.425	1.49438	0.302513	4.93988	7.81701e-07	7.58591e-06	1.45219	up
ENSG00000115414	FN1	142.146	1.50078	0.323164	4.64402	3.41702e-06	3.01361e-05	1.452	up
ENSG00000126016	AMOT	74.4065	1.61052	0.588415	2.73706	0.00619919	0.0243521	1.45162	up
ENSG00000206260	PRR23A	4.9913	4.90785	2.98144	1.64614	0.0997355	0.233509	1.45102	-
ENSG00000225830	ERCC6	88.0013	1.57825	0.527207	2.9936	0.00275703	0.0121253	1.45083	up
ENSG00000206192	ANKRD20A9P	2.22951	3.93213	3.01891	1.3025	0.192746		1.45067	-
ENSG00000161048	NAPEPLD	105.433	1.638	0.638488	2.56543	0.0103048	0.0375007	1.45067	up
ENSG00000272750		6.20201	2.49533	1.74627	1.42895	0.153019	0.320118	1.45037	-
ENSG00000132953	XPO4	219.412	1.48178	0.264346	5.60544	2.07721e-08	2.67421e-07	1.45023	up
ENSG00000110723	EXPH5	127.489	1.60287	0.584337	2.74306	0.00608687	0.0239594	1.44972	up
ENSG00000133124	IRS4	20.7276	2.54351	1.46455	1.73672	0.0824362	0.202	1.44959	-
ENSG00000188419	CHM	138.181	1.53836	0.440775	3.49014	0.00048277	0.00263893	1.44935	up
ENSG00000284703		10.724	2.04319	1.34564	1.51838	0.12892	0.283083	1.44906	-
ENSG00000116574	RHOU	68.8029	1.53503	0.441381	3.47779	0.000505574	0.00274466	1.44895	up
ENSG00000085449	WDFY1	183.588	1.50247	0.341847	4.39516	1.10691e-05	8.82769e-05	1.44808	up
ENSG00000139793	MBNL2	49.6233	1.71849	0.776218	2.21392			1.44801	-
ENSG00000166483	WEE1	494.009	1.49959	0.335174	4.47405	7.67504e-06	6.3323e-05	1.44772	up
ENSG00000143190	POU2F1	383.596	1.49465	0.324542	4.60543	4.11614e-06	3.57297e-05	1.44761	up
ENSG00000067248	DHX29	609.99	1.46935	0.218756	6.71685	1.85691e-11	3.76818e-10	1.4472	up
ENSG00000197050	ZNF420	107.613	1.54409	0.449956	3.43164	0.000599933	0.00318967	1.44677	up
ENSG00000149218	ENDOD1	149.973	1.55663	0.496413	3.13575	0.00171415	0.00806474	1.44651	up
ENSG00000177189	RPS6KA3	435.768	1.46652	0.21013	6.9791	2.97067e-12	6.70803e-11	1.44638	up
ENSG00000139990	DCAF5	247.278	1.54747	0.468314	3.30435	0.000951975	0.00481599	1.44636	up
ENSG00000274561		12.8933	2.72444	1.58839	1.71522	0.0863046	0.209127	1.44609	-
ENSG00000169218	RSPO1	1.81833	4.30318	2.74266	1.56898	0.116653		1.44551	-
ENSG00000173542	MOB1B	195.054	1.49269	0.322682	4.6259	3.72971e-06	3.25893e-05	1.44531	up
ENSG00000153560	UBP1	350.894	1.4779	0.267271	5.52961	3.20943e-08	4.0019e-07	1.44487	up
ENSG00000279628		3.7543	5.72348	3.57216	1.60225	0.109101	0.249629	1.44416	-
ENSG00000151575	TEX9	90.059	1.55557	0.514228	3.02506	0.00248585	0.0110802	1.44386	up
ENSG00000260160		3.03491	2.70214	2.26323	1.19393	0.232504	0.430565	1.44364	-
ENSG00000171488	LRRC8C	109.547	1.52731	0.424057	3.60165	0.000316205	0.00181135	1.44335	up
ENSG00000278730		119.622	1.52121	0.40534	3.75294	0.000174775	0.00106096	1.44322	up
ENSG00000276846		15.6081	2.12946	1.33804	1.59148	0.111502	0.253543	1.44312	-
ENSG00000063515	GSC2	8.013	1.89852	1.25822	1.5089	0.131326	0.286905	1.44181	-
ENSG00000188171	ZNF626	51.6637	1.63926	0.664399	2.46728	0.0136144	0.0473043	1.44096	up
ENSG00000011201	ANOS1	17.4126	2.38171	1.30556	1.82429	0.068108	0.173942	1.44075	-
ENSG00000052795	FNIP2	356.265	1.48598	0.315434	4.71091	2.46609e-06	2.22746e-05	1.44037	up
ENSG00000179295	PTPN11	652.615	1.48262	0.305364	4.85525	1.20234e-06	1.1362e-05	1.44034	up
ENSG00000156535	CD109	146.814	1.56827	0.516751	3.03487	0.00240638	0.0108036	1.44025	up
ENSG00000157315	TMED6	4.58774	2.82383	2.13803	1.32077	0.18658	0.368073	1.44018	-
ENSG00000186416	NKRF	227.013	1.48833	0.328391	4.53218	5.83772e-06	4.92505e-05	1.44013	up
ENSG00000105976	MET	146.581	1.49334	0.337109	4.42985	9.42999e-06	7.62476e-05	1.43997	up
ENSG00000133131	MORC4	280.026	1.52989	0.438784	3.48666	0.000489098	0.00266837	1.43932	up
ENSG00000146433	TMEM181	278.339	1.47828	0.294592	5.01808	5.21915e-07	5.24455e-06	1.43868	up
ENSG00000137145	DENND4C	316.453	1.48319	0.311452	4.76218	1.91512e-06	1.75783e-05	1.43852	up
ENSG00000130783	CCDC62	12.5792	3.74003	2.0396	1.83371	0.0666976	0.171045	1.43838	-
ENSG00000241743	XACT	182.35	1.64185	0.656119	2.50236	0.0123369	0.0435915	1.43838	up
ENSG00000065328	MCM10	636.153	1.45089	0.169886	8.54037	1.33793e-17	5.84267e-16	1.43771	up
ENSG00000127328	RAB3IP	611.724	1.46486	0.245434	5.96845	2.39521e-09	3.57856e-08	1.43768	up
ENSG00000134755	DSC2	177.5	1.74588	0.787797	2.21615	0.0266811	0.0822675	1.43737	-
ENSG00000122367	LDB3	4.77674	1.98165	1.21357	1.63291	0.102489	0.238155	1.43722	-
ENSG00000290051		1.69497	3.22998	2.41031	1.34007	0.180224		1.43647	-
ENSG00000174720	LARP7	1165.19	1.47232	0.282525	5.21128	1.87546e-07	2.05657e-06	1.43602	up
ENSG00000278022		1.84296	4.48788	3.04552	1.4736	0.140588		1.43585	-
ENSG00000145147	SLIT2	156.988	1.49128	0.347569	4.2906	1.78191e-05	0.000135409	1.43493	up
ENSG00000104112	SCG3	7.62883	1.77496	1.10391	1.60788	0.107862	0.24748	1.43451	-
ENSG00000262772	LINC01977	2.71161	4.7393	2.71442	1.74597	0.0808164		1.43409	-
ENSG00000184408	KCND2	27.1276	2.06559	1.26291	1.63559	0.101926	0.237289	1.43395	-
ENSG00000184304	PRKD1	101.154	1.64196	0.677121	2.42491	0.0153122	0.0520362	1.4339	-
ENSG00000029153	ARNTL2	121.646	1.56636	0.542006	2.88993	0.00385332	0.0162165	1.4336	up
ENSG00000138061	CYP1B1	32.7897	1.92009	1.04482	1.83773	0.0661028	0.169871	1.4334	-
ENSG00000163312	HELQ	101.412	1.50511	0.403638	3.72886	0.00019235	0.00115561	1.43331	up
ENSG00000110756	HPS5	161.707	1.4794	0.312206	4.73855	2.15256e-06	1.96305e-05	1.4333	up
ENSG00000174282	ZBTB4	38.0078	1.57079	0.5709	2.75142	0.00593369	0.0234626	1.43326	up
ENSG00000241170	RPL31P46	17.236	1.67548	0.749481	2.23552	0.0253831	0.0789528	1.43315	-
ENSG00000163507	CIP2A	157.737	1.50376	0.402156	3.73925	0.000184569	0.00111325	1.43244	up
ENSG00000197323	TRIM33	535.824	1.4717	0.292342	5.03416	4.79953e-07	4.8648e-06	1.4324	up
ENSG00000119912	IDE	243.159	1.50114	0.389855	3.8505	0.000117875	0.000747595	1.43209	up
ENSG00000167258	CDK12	243.258	1.48244	0.332463	4.45898	8.23501e-06	6.73823e-05	1.43184	up
ENSG00000119471	HSDL2	625.292	1.46367	0.265459	5.51375	3.51271e-08	4.35814e-07	1.43183	up
ENSG00000031691	CENPQ	322.583	1.46453	0.273698	5.3509	8.75155e-08	1.00936e-06	1.4318	up
ENSG00000122376	SHLD2	247.925	1.47073	0.296841	4.9546	7.24775e-07	7.07852e-06	1.43154	up
ENSG00000164187	LMBRD2	140.402	1.49857	0.37757	3.96898	7.21818e-05	0.00048055	1.43085	up
ENSG00000100207	TCF20	266.279	1.57393	0.559538	2.81292	0.0049094	0.0199291	1.43019	up
ENSG00000165995	CACNB2	50.4638	1.92809	1.01757	1.89479	0.0581198	0.15321	1.43009	-
ENSG00000065361	ERBB3	332.306	1.45122	0.216462	6.70426	2.02427e-11	4.06619e-10	1.42988	up
ENSG00000092201	SUPT16H	1844.3	1.45081	0.217168	6.68057	2.38017e-11	4.73313e-10	1.42925	up
ENSG00000248429	GASK1B-AS1	4.46945	2.26276	1.62005	1.39672	0.162498	0.333956	1.42838	-
ENSG00000236317		5.01344	3.32323	2.42476	1.37054			1.42834	-
ENSG00000165490	DDIAS	250.33	1.48342	0.351639	4.21859	2.45838e-05	0.000180719	1.42771	up
ENSG00000145864	GABRB2	8.20638	1.84641	1.15406	1.59993	0.109615	0.250459	1.42764	-
ENSG00000280177		4.06445	5.20778	2.72858	1.9086	0.0563132	0.14946	1.42748	-
ENSG00000136542	GALNT5	2.69721	2.62461	2.06963	1.26815	0.204743		1.42685	-
ENSG00000177034	MTX3	229.045	1.50408	0.419588	3.58467	0.000337505	0.0019195	1.4267	up
ENSG00000269044		41.8202	1.71998	0.856947	2.0071	0.0447389	0.124616	1.42652	-
ENSG00000165097	KDM1B	165.516	1.50296	0.405342	3.7079	0.000208988	0.00124352	1.42603	up
ENSG00000102158	MAGT1	1034.86	1.47264	0.321252	4.58406	4.56036e-06	3.91741e-05	1.4258	up
ENSG00000091073	DTX2	193.085	1.51887	0.444173	3.41956	0.000627234	0.00332412	1.4254	up
ENSG00000198062	POTEH	8.22406	3.96241	1.92775	2.05546	0.0398349	0.113685	1.42504	-
ENSG00000117000	RLF	255.312	1.48159	0.351202	4.21862	2.45801e-05	0.000180719	1.42465	up
ENSG00000170153	RNF150	132.458	1.55368	0.532686	2.9167	0.0035376	0.0150667	1.4246	up
ENSG00000280132		17.6307	1.66722	0.83254	2.00257	0.0452236	0.12554	1.42448	-
ENSG00000196504	PRPF40A	2816.17	1.44028	0.188584	7.63733	2.21769e-14	6.58203e-13	1.42425	up
ENSG00000088387	DOCK9	70.7485	1.55582	0.538166	2.89097	0.0038405	0.0161729	1.4241	up
ENSG00000212163	SNORD91A	12.8864	2.17343	1.4119	1.53936	0.123716	0.274638	1.4238	-
ENSG00000248092	NNT-AS1	858.334	1.44902	0.240102	6.035	1.5896e-09	2.43174e-08	1.42323	up
ENSG00000288890		9.064	2.01752	1.3239	1.52393	0.127526	0.280614	1.42311	-
ENSG00000186684	CYP27C1	45.7608	1.50014	0.443435	3.383	0.000716998	0.0037438	1.42277	up
ENSG00000187918	OR51I2	4.69869	2.63054	1.87828	1.40051	0.161362	0.332403	1.42263	-
ENSG00000138646	HERC5	238.03	1.47634	0.344678	4.28325	1.84187e-05	0.000139537	1.42259	up
ENSG00000215559	ANKRD20A11P	31.2152	1.69759	0.784041	2.16519	0.0303735	0.0911986	1.42228	-
ENSG00000198018	ENTPD7	120.842	1.56442	0.583888	2.67931	0.00737742	0.028231	1.42207	up
ENSG00000230863		3.80458	3.31032	2.22452	1.48811	0.136723	0.295087	1.42205	-
ENSG00000085511	MAP3K4	141.024	1.49008	0.389871	3.822	0.000132376	0.000826608	1.42184	up
ENSG00000258925	NPM1P5	47.3766	1.50771	0.476207	3.16608	0.00154508	0.0073796	1.42166	up
ENSG00000178852	EFCAB13	13.1462	1.73131	0.869492	1.99118	0.0464613	0.128418	1.42132	-
ENSG00000141367	CLTC	1393.73	1.44663	0.23707	6.10211	1.04677e-09	1.64709e-08	1.42117	up
ENSG00000165699	TSC1	177.916	1.46884	0.322871	4.54932	5.38208e-06	4.57177e-05	1.42108	up
ENSG00000070367	EXOC5	379.072	1.44018	0.211018	6.8249	8.79852e-12	1.87167e-10	1.4207	up
ENSG00000197102	DYNC1H1	710.67	1.46965	0.324346	4.53112	5.86717e-06	4.94358e-05	1.42053	up
ENSG00000109920	FNBP4	494.787	1.46398	0.311061	4.70642	2.52107e-06	2.27401e-05	1.42044	up
ENSG00000118946	PCDH17	123.346	1.52792	0.492611	3.10168	0.00192429	0.00891169	1.42027	up
ENSG00000163082	SGPP2	20.0314	1.79162	0.940596	1.90477	0.0568098	0.150456	1.41977	-
ENSG00000261824	LINC00662	597.18	1.46322	0.31812	4.5996	4.23303e-06	3.66906e-05	1.41881	up
ENSG00000165029	ABCA1	84.9459	1.64512	0.68116	2.41518	0.0157276	0.0531201	1.4182	-
ENSG00000233672	RNASEH2B-AS1	7.56781	1.79006	1.08203	1.65435	0.0980555	0.230611	1.41809	-
ENSG00000151090	THRB	111.083	1.48747	0.386276	3.8508	0.000117735	0.000746986	1.41756	up
ENSG00000223546	LINC00630	38.0658	1.65008	0.786298	2.09855	0.0358566	0.104436	1.41746	-
ENSG00000121741	ZMYM2	331.954	1.48156	0.378842	3.91076	9.20051e-05	0.000600031	1.41704	up
ENSG00000235532	LINC00402	4.74814	3.41547	2.20287	1.55047	0.12103	0.270028	1.41692	-
ENSG00000268205		127.565	1.47855	0.381436	3.87626	0.000106073	0.000682348	1.4169	up
ENSG00000080854	IGSF9B	44.3309	1.53055	0.494029	3.09809	0.0019477	0.00900961	1.41608	up
ENSG00000129422	MTUS1	235.58	1.47543	0.364411	4.04881	5.14797e-05	0.000355499	1.41607	up
ENSG00000136643	RPS6KC1	122.98	1.50935	0.466766	3.23363	0.00122227	0.00599969	1.41566	up
ENSG00000183091	NEB	48.4922	1.98286	1.11063	1.78535	0.0742052	0.185616	1.41545	-
ENSG00000140795	MYLK3	5.22396	2.20742	1.60852	1.37233	0.16996	0.34486	1.41536	-
ENSG00000170802	FOXN2	90.944	1.51461	0.481689	3.14436	0.00166448	0.00787027	1.41531	up
ENSG00000110422	HIPK3	110.176	1.49321	0.410027	3.64173	0.000270809	0.00157791	1.41511	up
ENSG00000165895	ARHGAP42	50.9397	1.64676	0.692193	2.37905	0.0173572	0.0577381	1.41502	-
ENSG00000230629	RPS23P8	1416.41	1.46208	0.327685	4.46186	8.12512e-06	6.66003e-05	1.41489	up
ENSG00000232098	ZNF584-DT	12.1779	1.91812	1.08822	1.76262	0.0779639	0.193407	1.41419	-
ENSG00000215838		4.96649	1.94545	1.31739	1.47674	0.139746	0.299524	1.41418	-
ENSG00000105792	CFAP69	8.6796	2.17849	1.39109	1.56603	0.117342	0.263356	1.41348	-
ENSG00000102763	VWA8	72.7473	1.50468	0.453415	3.31854	0.000904904	0.0046037	1.4133	up
ENSG00000267560		5.97031	2.82703	1.76985	1.59733	0.110193	0.251431	1.41256	-
ENSG00000223864	NPM1P19	1.6378	3.26712	2.44473	1.33639	0.181422		1.41232	-
ENSG00000128059	PPAT	697.3	1.44778	0.28104	5.15151	2.58404e-07	2.76327e-06	1.41225	up
ENSG00000171794	UTF1	77.3018	1.57653	0.534202	2.95119	0.00316552	0.0136523	1.41159	up
ENSG00000187984	ANKRD19P	18.0174	2.40322	1.41169	1.70236	0.0886871	0.213569	1.41102	-
ENSG00000233571		9.75864	1.88712	1.20399	1.56739	0.117025	0.262964	1.41063	-
ENSG00000159147	DONSON	276.23	1.43303	0.225918	6.34314	2.25122e-10	3.93934e-09	1.41054	up
ENSG00000289293		3.73347	2.55243	1.83778	1.38886	0.164874	0.337302	1.41007	-
ENSG00000132932	ATP8A2	93.9356	1.50647	0.445584	3.3809	0.000722487	0.00376896	1.40979	up
ENSG00000204267	TAP2	66.5698	1.57146	0.575577	2.73023	0.00632895	0.0247735	1.4095	up
ENSG00000272024		4.5793	2.8919	2.20305	1.31268	0.18929	0.371806	1.40911	-
ENSG00000188647	PTAR1	476.676	1.45941	0.337688	4.32177	1.54781e-05	0.000119265	1.40894	up
ENSG00000021645	NRXN3	20.5948	1.80172	0.934962	1.92706	0.0539727	0.144662	1.40855	-
ENSG00000269888		10.1582	1.83341	0.949848	1.93021	0.0535802	0.143707	1.4084	-
ENSG00000051382	PIK3CB	205.6	1.46788	0.362443	4.04997	5.12251e-05	0.000353884	1.40815	up
ENSG00000152078	TLCD4	158.186	1.5105	0.49149	3.0733	0.00211707	0.00967788	1.4072	up
ENSG00000078618	NRDC	1707.39	1.42912	0.221081	6.46426	1.01795e-10	1.86179e-09	1.40703	up
ENSG00000169359	SLC33A1	101.924	1.47423	0.390209	3.77805	0.000158058	0.000972282	1.40634	up
ENSG00000213228	RPL12P38	60.2204	1.51074	0.507136	2.97896	0.00289229	0.01265	1.40495	up
ENSG00000137414	FAM8A1	181.596	1.67093	0.790712	2.1132	0.0345838	0.101504	1.40429	-
ENSG00000236976	RPL6P20	8.82157	1.66951	0.856096	1.95014	0.0511593	0.138474	1.40412	-
ENSG00000189079	ARID2	337.245	1.4395	0.283829	5.07172	3.94235e-07	4.08578e-06	1.40338	up
ENSG00000136485	DCAF7	1030.19	1.41306	0.149363	9.46056	3.06304e-21	1.99762e-19	1.40316	up
ENSG00000165185	KIAA1958	175.761	1.51442	0.498582	3.03746	0.00238581	0.0107202	1.40304	up
ENSG00000101489	CELF4	251.327	1.43703	0.277861	5.17176	2.31897e-07	2.50141e-06	1.40244	up
ENSG00000176624	MEX3C	157.557	1.46471	0.370974	3.94828	7.87137e-05	0.000520887	1.40221	up
ENSG00000085982	USP40	288.787	1.48899	0.433529	3.43459	0.00059346	0.00316055	1.40209	up
ENSG00000226674	TEX41	23.541	1.85819	1.0623	1.74922	0.0802536	0.197776	1.40164	-
ENSG00000271425	NBPF10	3.20111	2.17426	1.60504	1.35465	0.175529	0.352813	1.4015	-
ENSG00000170448	NFXL1	174.156	1.43707	0.281996	5.09607	3.46771e-07	3.62801e-06	1.40138	up
ENSG00000168140	VASN	14.6613	2.1042	1.31671	1.59808	0.110026	0.251136	1.401	-
ENSG00000144395	CCDC150	82.1399	1.55795	0.623131	2.5002	0.0124121	0.0438026	1.40082	up
ENSG00000085563	ABCB1	22.1795	1.56892	0.663635	2.36414	0.0180722	0.0595941	1.40067	-
ENSG00000176444	CLK2	242.993	1.46583	0.391494	3.7442	0.000180969	0.00109454	1.40047	up
ENSG00000107731	UNC5B	161.13	1.46683	0.373806	3.92404	8.70772e-05	0.000571458	1.40015	up
ENSG00000114346	ECT2	705.241	1.42331	0.232927	6.11056	9.92805e-10	1.56839e-08	1.39914	up
ENSG00000231690	LINC00574	3.0546	4.00558	2.55768	1.5661	0.117325	0.263356	1.39906	-
ENSG00000077232	DNAJC10	595.446	1.43135	0.270431	5.29282	1.20444e-07	1.35832e-06	1.39902	up
ENSG00000164659	ELAPOR2	246.303	1.46024	0.36811	3.96686	7.28267e-05	0.00048468	1.39889	up
ENSG00000064393	HIPK2	460.864	1.43451	0.285303	5.02803	4.95536e-07	4.99918e-06	1.39879	up
ENSG00000122477	LRRC39	4.91662	2.68924	1.89976	1.41557	0.156901	0.325573	1.39878	-
ENSG00000025293	PHF20	1015.54	1.42629	0.254915	5.59515	2.20431e-08	2.82748e-07	1.39768	up
ENSG00000124198	ARFGEF2	162.428	1.5058	0.496702	3.03159	0.00243267	0.0108798	1.39714	up
ENSG00000120278	PLEKHG1	177.062	1.45774	0.376798	3.86876	0.000109389	0.000700497	1.39712	up
ENSG00000086712	TXLNG	775.075	1.43322	0.288275	4.97172	6.63613e-07	6.52295e-06	1.39648	up
ENSG00000151773	CCDC122	42.4994	1.70394	0.923107	1.84588	0.0649103	0.167523	1.39584	-
ENSG00000172888	ZNF621	151.203	1.47658	0.437514	3.37494	0.000738321	0.00384198	1.39358	up
ENSG00000140262	TCF12	335.503	1.46537	0.405432	3.61433	0.000301125	0.0017365	1.39322	up
ENSG00000164631	ZNF12	173.901	1.47068	0.415268	3.54152	0.000397831	0.00222305	1.39317	up
ENSG00000138160	KIF11	985.876	1.42074	0.250664	5.66792	1.4454e-08	1.91939e-07	1.39306	up
ENSG00000204194	RPL12P1	4.41841	1.91725	1.20213	1.59488	0.11074	0.252331	1.3926	-
ENSG00000162971	TYW5	169.507	1.60867	0.709808	2.26634	0.0234307	0.0740652	1.39252	-
ENSG00000153989	NUS1	237.232	1.44545	0.352199	4.10407	4.0595e-05	0.000286623	1.39178	up
ENSG00000156876	SASS6	245.537	1.44662	0.356054	4.06291	4.84638e-05	0.000336548	1.39133	up
ENSG00000251602	MTA1-DT	185.92	1.4639	0.424796	3.44612	0.000568689	0.00304314	1.39047	up
ENSG00000132613	MTSS2	26.644	1.74852	0.857426	2.03926	0.0414238	0.117274	1.38978	-
ENSG00000196922	ZNF252P	162.523	1.44078	0.351722	4.09635	4.19712e-05	0.000295498	1.38941	up
ENSG00000258920	FOXN3-AS1	9.25188	2.74153	1.62004	1.69226	0.0905962	0.217164	1.3894	-
ENSG00000106723	SPIN1	315.129	1.45282	0.380735	3.81582	0.000135733	0.000846242	1.38936	up
ENSG00000003402	CFLAR	52.7858	1.56145	0.583692	2.67512	0.0074703	0.0285258	1.38663	up
ENSG00000138376	BARD1	480.955	1.42245	0.287766	4.94308	7.68973e-07	7.48422e-06	1.38581	up
ENSG00000105849	POLR1F	1260.6	1.40026	0.184126	7.60488	2.85164e-14	8.35104e-13	1.38542	up
ENSG00000250471	GMPSP1	11.858	1.83291	0.974003	1.88183	0.0598588	0.156834	1.3853	-
ENSG00000105464	GRIN2D	20.7885	1.85464	1.00404	1.84717			1.38509	-
ENSG00000251488		6.20476	3.20471	2.07321	1.54577	0.12216	0.271731	1.38435	-
ENSG00000179833	SERTAD2	169.645	1.48964	0.486565	3.06154	0.00220202	0.0100017	1.38414	up
ENSG00000183454	GRIN2A	25.0218	2.71261	1.63353	1.66058	0.0967972	0.228389	1.38406	-
ENSG00000135862	LAMC1	1115.63	1.41111	0.247326	5.70544	1.16041e-08	1.55763e-07	1.38391	up
ENSG00000260212		1.72989	3.84908	2.41379	1.59462	0.110796		1.3827	-
ENSG00000169282	KCNAB1	7.05529	2.00116	1.38638	1.44344	0.148896	0.31401	1.38227	-
ENSG00000143869	GDF7	46.0369	1.60795	0.714444	2.25063	0.024409	0.0766687	1.38224	-
ENSG00000171723	GPHN	227.251	1.43088	0.337217	4.24321	2.20342e-05	0.000163614	1.38204	up
ENSG00000240288	GHRLOS	4.27029	2.27916	1.79267	1.27138	0.203595	0.391893	1.3819	-
ENSG00000076984	MAP2K7	523.737	1.46133	0.428626	3.40934	0.000651209	0.00343923	1.38183	up
ENSG00000135272	MDFIC	103.322	1.48825	0.494591	3.00905	0.00262067	0.0116132	1.38175	up
ENSG00000099204	ABLIM1	312.015	1.42867	0.324597	4.40135	1.07577e-05	8.60011e-05	1.38145	up
ENSG00000085832	EPS15	307.478	1.42803	0.330269	4.32384	1.5334e-05	0.000118384	1.38025	up
ENSG00000249753		2.53028	3.02374	2.38783	1.26631	0.205401		1.38004	-
ENSG00000041353	RAB27B	2.70864	2.59053	2.27443	1.13898	0.254713		1.37995	-
ENSG00000205189	ZBTB10	225.286	1.40918	0.256647	5.49072	4.00293e-08	4.92932e-07	1.37987	up
ENSG00000163328	GPR155	78.6283	1.43236	0.350914	4.08179	4.46902e-05	0.000312863	1.3798	up
ENSG00000139908	TSSK4	2.72532	4.15424	3.03323	1.36958	0.170819		1.37949	-
ENSG00000154429	CCSAP	166.614	1.44564	0.388319	3.72281	0.000197017	0.00117972	1.3792	up
ENSG00000261126	RBFADN	3.309	2.09363	1.52637	1.37164	0.170175	0.345084	1.37823	-
ENSG00000213239	NPM1P32	4.4403	2.19139	1.47908	1.48159	0.138449	0.297647	1.37803	-
ENSG00000116044	NFE2L2	762.942	1.39259	0.181249	7.6833	1.55039e-14	4.68567e-13	1.37799	up
ENSG00000158023	CFAP251	4.52753	3.88573	2.16406	1.79557	0.0725623	0.182543	1.3774	-
ENSG00000187742	SECISBP2	995.795	1.39257	0.192356	7.23957	4.50101e-13	1.12107e-11	1.37653	up
ENSG00000248905	FMN1	3.7668	2.42789	1.83147	1.32565	0.184956	0.365725	1.37596	-
ENSG00000184005	ST6GALNAC3	56.6606	1.68309	0.884214	1.90349	0.0569767	0.150777	1.37444	-
ENSG00000086758	HUWE1	601.965	1.39377	0.214078	6.51055	7.48773e-11	1.39785e-09	1.37365	up
ENSG00000150527	MIA2	139.907	1.43185	0.368036	3.89051	0.000100035	0.000647077	1.37325	up
ENSG00000128829	EIF2AK4	787.23	1.41288	0.30282	4.66575	3.07495e-06	2.73749e-05	1.37279	up
ENSG00000150471	ADGRL3	103.283	1.65497	0.801814	2.06403	0.0390147	0.111714	1.37257	-
ENSG00000039123	MTREX	864.572	1.39058	0.205044	6.78189	1.18613e-11	2.45986e-10	1.37238	up
ENSG00000125962	ARMCX5	134.197	1.45119	0.416736	3.48229	0.000497145	0.00270408	1.37152	up
ENSG00000273058		2.45351	3.12224	2.68663	1.16214	0.245179		1.37124	-
ENSG00000265480	KRT18P55	8.07069	2.9514	1.85344	1.59239	0.111296	0.253192	1.37122	-
ENSG00000151623	NR3C2	32.1804	1.58899	0.690046	2.30273	0.0212943	0.068303	1.37102	-
ENSG00000083099	LYRM2	913.817	1.39176	0.226916	6.13338	8.6032e-10	1.37665e-08	1.3699	up
ENSG00000163848	ZNF148	360.267	1.41359	0.316325	4.4688	7.86596e-06	6.46829e-05	1.36981	up
ENSG00000008294	SPAG9	535.625	1.41204	0.315551	4.47484	7.647e-06	6.3166e-05	1.36955	up
ENSG00000259469		3.45598	2.38739	1.79716	1.32842	0.184038	0.364255	1.36947	-
ENSG00000286219	NOTCH2NLC	19.0921	1.72773	0.910231	1.89812	0.0576806	0.152355	1.36907	-
ENSG00000067177	PHKA1	193.344	1.43665	0.373198	3.84958	0.000118321	0.000749707	1.3688	up
ENSG00000117528	ABCD3	464.055	1.39735	0.259252	5.38993	7.0487e-08	8.26908e-07	1.36842	up
ENSG00000259250		3.96419	3.18203	2.18029	1.45945	0.144441	0.306945	1.36823	-
ENSG00000104998	IL27RA	228.231	1.43539	0.394816	3.63559	0.000277345	0.00161111	1.36815	up
ENSG00000258303		3.10746	2.08963	1.63948	1.27457	0.202462	0.390292	1.36706	-
ENSG00000048707	VPS13D	119.919	1.47403	0.483632	3.04783	0.002305	0.0104145	1.36646	up
ENSG00000188730	VWC2	39.4739	2.31022	1.40945	1.63909	0.101194	0.236143	1.366	-
ENSG00000018510	AGPS	553.227	1.38777	0.223634	6.20556	5.4502e-10	9.06507e-09	1.36599	up
ENSG00000174469	CNTNAP2	35.7006	1.56056	0.700713	2.22711	0.02594	0.080395	1.36563	-
ENSG00000183111	ARHGEF37	7.60457	1.69902	1.05749	1.60666	0.108129	0.247915	1.36556	-
ENSG00000251192	ZNF674	36.8681	1.53926	0.677639	2.27151	0.0231164	0.0732351	1.36552	-
ENSG00000100030	MAPK1	443.002	1.40784	0.308506	4.56342	5.03275e-06	4.30083e-05	1.3654	up
ENSG00000116199	FAM20B	277.957	1.43028	0.389449	3.67257	0.000240124	0.00141435	1.36534	up
ENSG00000103994	ZNF106	739.614	1.38764	0.227834	6.09058	1.12505e-09	1.7577e-08	1.36504	up
ENSG00000145241	CENPC	168.209	1.45333	0.46091	3.15318	0.00161504	0.00766391	1.36489	up
ENSG00000272150	NBPF25P	2.18312	2.93245	1.92644	1.52221	0.127957		1.36346	-
ENSG00000281183	NPTN-IT1	6.75044	3.25261	2.13352	1.52452	0.127378	0.280444	1.36305	-
ENSG00000111615	KRR1	878.601	1.37544	0.171606	8.01513	1.10016e-15	3.81994e-14	1.36304	up
ENSG00000146021	KLHL3	7.22519	2.17688	1.55751	1.39767	0.162212	0.333721	1.36293	-
ENSG00000136603	SKIL	229.224	1.41875	0.363586	3.90212	9.53552e-05	0.000620242	1.36266	up
ENSG00000134324	LPIN1	147.16	1.41227	0.339077	4.16506	3.11277e-05	0.000224414	1.36233	up
ENSG00000088367	EPB41L1	143.794	1.4222	0.37456	3.79698	0.000146467	0.000906603	1.36202	up
ENSG00000120733	KDM3B	377.457	1.43157	0.397659	3.59998	0.000318241	0.00181986	1.36178	up
ENSG00000154727	GABPA	146.974	1.39113	0.268326	5.18447	2.16634e-07	2.34698e-06	1.36161	up
ENSG00000116747	RO60	1531.37	1.39428	0.278277	5.01038	5.43213e-07	5.43926e-06	1.36136	up
ENSG00000157764	BRAF	154.821	1.40874	0.332592	4.23565	2.27895e-05	0.000168843	1.36053	up
ENSG00000141655	TNFRSF11A	260.569	1.48244	0.526044	2.8181	0.00483092	0.0196588	1.36001	up
ENSG00000134531	EMP1	12.5858	1.89066	1.19236	1.58564	0.11282	0.255718	1.35991	-
ENSG00000091157	WDR7	46.7225	1.47941	0.522242	2.8328	0.00461417	0.018897	1.35976	up
ENSG00000236809	SNX25P1	2.87854	2.48816	2.00264	1.24244	0.214073	0.406029	1.35963	-
ENSG00000102921	N4BP1	172.077	1.57168	0.701172	2.2415	0.0249938	0.0780792	1.3596	-
ENSG00000271009		7.1379	2.81493	1.7211	1.63554	0.101936	0.237289	1.35942	-
ENSG00000171681	ATF7IP	389.377	1.39596	0.291747	4.78482	1.7114e-06	1.58627e-05	1.3592	up
ENSG00000122786	CALD1	1226.7	1.37108	0.16672	8.22384	1.97084e-16	7.55783e-15	1.35908	up
ENSG00000196455	PIK3R4	136.777	1.41666	0.370521	3.82343	0.000131609	0.000822081	1.35905	up
ENSG00000135341	MAP3K7	402.244	1.38843	0.264551	5.24824	1.53558e-07	1.70557e-06	1.35871	up
[truncated: 59,861 more rows]

## Sheet: IP vs input in DKO HAP1
gene_id	gene_name	baseMean	log2FoldChange	lfcSE	stat	pvalue	padj	log2FoldChange.shrunk	sign
ENSG00000131016	AKAP12	5015.22	4.60574	0.299769	15.3643	2.84e-53	2.6985e-50	4.47772	up
ENSG00000275110		27.6699	5.65285	1.14598	4.93275	8.10798e-07	7.95653e-06	4.28964	up
ENSG00000215271	HOMEZ	757.091	4.28117	0.381078	11.2343	2.76548e-29	4.54412e-27	4.09523	up
ENSG00000197555	SIPA1L1	665.892	4.09686	0.454632	9.01138	2.03485e-19	1.28155e-17	3.84489	up
ENSG00000196526	AFAP1	59.4143	4.24489	0.710471	5.97476	2.30432e-09	3.79141e-08	3.71053	up
ENSG00000130032	PRRG3	380.724	5.12798	1.2008	4.27046	1.9507e-05	0.000135766	3.67623	up
ENSG00000154856	APCDD1	25.2617	4.73572	1.05207	4.50135	6.75232e-06	5.27395e-05	3.67381	up
ENSG00000278703		14.7366	5.45722	1.49017	3.66214	0.000250115	0.00127413	3.55326	up
ENSG00000243101	RPS3P7	41.3505	4.34198	1.05569	4.11293	3.90676e-05	0.0002523	3.44581	up
ENSG00000107854	TNKS2	567.551	3.42991	0.276109	12.4223	1.97787e-35	4.96832e-33	3.34888	up
ENSG00000274422		25.8791	4.10841	0.940708	4.36736	1.25759e-05	9.21642e-05	3.32113	up
ENSG00000100227	POLDIP3	29.1889	3.67781	0.68139	5.39751	6.75727e-08	8.38577e-07	3.26708	up
ENSG00000275342	PRAG1	64.7634	3.72903	0.684149	5.45061	5.01975e-08	6.378e-07	3.25793	up
ENSG00000199994	RNA5SP145	61.2693	8.96872	2.03698	4.40295	1.0679e-05	7.97606e-05	3.24064	up
ENSG00000266074	BAHCC1	381.033	3.30722	0.348935	9.47805	2.59085e-21	2.09706e-19	3.18727	up
ENSG00000164692	COL1A2	5.91003	6.26097	2.21901	2.82151	0.00477976	0.016105	3.17588	up
ENSG00000107338	SHB	122.902	3.29694	0.361588	9.11796	7.65516e-20	5.13178e-18	3.17563	up
ENSG00000218891	ZNF579	113.714	3.3934	0.500516	6.7798	1.20344e-11	2.90929e-10	3.15885	up
ENSG00000261150	EPPK1	38.0761	4.07076	0.982783	4.14207	3.44183e-05	0.000224732	3.15213	up
ENSG00000242732	RTL5	26.4825	3.70444	0.789413	4.69265	2.69688e-06	2.34531e-05	3.13391	up
ENSG00000226945		69.4571	3.5822	0.656449	5.45694	4.84413e-08	6.1764e-07	3.11718	up
ENSG00000134909	ARHGAP32	176.505	3.28492	0.426746	7.69761	1.3864e-14	5.19697e-13	3.11215	up
ENSG00000206418	RAB12	92.7072	3.4141	0.551463	6.19098	5.97905e-10	1.07989e-08	3.11093	up
ENSG00000076826	CAMSAP3	111.8	3.35016	0.51204	6.54275	6.0396e-11	1.31072e-09	3.10588	up
ENSG00000289194		272.432	3.25354	0.395075	8.23524	1.79198e-16	8.56937e-15	3.10375	up
ENSG00000087510	TFAP2C	204.898	3.30064	0.460479	7.16785	7.61858e-13	2.21111e-11	3.10122	up
ENSG00000120669	SOHLH2	158.523	3.7526	0.698705	5.3708	7.83884e-08	9.61335e-07	3.09809	up
ENSG00000166340	TPP1	172.475	3.28142	0.448013	7.3244	2.39979e-13	7.5136e-12	3.09679	up
ENSG00000204388	HSPA1B	137.316	3.27418	0.450301	7.27109	3.56587e-13	1.07636e-11	3.07419	up
ENSG00000150893	FREM2	144.668	3.32516	0.60258	5.5182	3.42487e-08	4.48241e-07	2.99045	up
ENSG00000101298	SNPH	34.9633	3.69937	0.941372	3.92976	8.50303e-05	0.000496195	2.98662	up
ENSG00000273203		17.9467	3.8282	1.04249	3.67217	0.000240498	0.00123434	2.97738	up
ENSG00000277157	H4C4	71.6534	3.30046	0.599789	5.50271	3.74004e-08	4.86227e-07	2.97408	up
ENSG00000111642	CHD4	820.59	3.03871	0.275975	11.0108	3.3892e-28	5.21603e-26	2.96835	up
ENSG00000289045		28.7527	3.93608	1.0428	3.77454	0.000160302	0.000866494	2.9572	up
ENSG00000166439	RNF169	98.3618	3.44575	0.783084	4.40023	1.08136e-05	8.06828e-05	2.91438	up
ENSG00000039650	PNKP	506.29	3.00957	0.323386	9.30643	1.32202e-20	9.7606e-19	2.91333	up
ENSG00000149548	CCDC15	117.69	3.14035	0.496368	6.32665	2.50542e-10	4.85403e-09	2.91251	up
ENSG00000171988	JMJD1C	360.191	3.08629	0.44106	6.99745	2.60662e-12	7.05013e-11	2.9042	up
ENSG00000091656	ZFHX4	281.733	3.05124	0.414838	7.35525	1.90567e-13	6.0621e-12	2.89096	up
ENSG00000103647	CORO2B	50.1706	3.20516	0.621447	5.15757	2.50171e-07	2.74322e-06	2.88774	up
ENSG00000198062	POTEH	8.22406	5.5353	1.90013	2.91312	0.00357839	0.0126214	2.88059	up
ENSG00000189157	FAM47E	7.56277	6.42385	2.06777	3.10665	0.00189217	0.00736317	2.87828	up
ENSG00000008382	MPND	109.611	3.09028	0.498066	6.20457	5.48455e-10	9.98829e-09	2.87247	up
ENSG00000198728	LDB1	277.093	2.98213	0.364219	8.18772	2.66219e-16	1.23262e-14	2.86288	up
ENSG00000270909		13.196	3.85332	1.11168	3.46621	0.000527847	0.00244657	2.85457	up
ENSG00000121101	TEX14	22.9235	4.82203	1.45721	3.30908	0.00093604	0.00403158	2.85335	up
ENSG00000168916	ZNF608	91.551	3.00941	0.46004	6.54163	6.08528e-11	1.31932e-09	2.81832	up
ENSG00000138039	LHCGR	23.9985	3.23631	0.773723	4.18277	2.87973e-05	0.000192105	2.81437	up
ENSG00000230896		10.9711	5.27388	1.63347	3.22863	0.00124385	0.00515318	2.81045	up
ENSG00000161395	PGAP3	139.429	3.37429	0.859519	3.92578	8.64475e-05	0.000503793	2.80569	up
ENSG00000183856	IQGAP3	273.534	2.89661	0.354713	8.16607	3.18604e-16	1.46277e-14	2.79052	up
ENSG00000289357		123.404	2.96967	0.489182	6.07068	1.27368e-09	2.18486e-08	2.76663	up
ENSG00000196497	IPO4	50.2386	3.05522	0.564534	5.41194	6.23473e-08	7.79038e-07	2.76657	up
ENSG00000176973	FAM89B	68.5081	3.02521	0.5672	5.33357	9.62986e-08	1.15887e-06	2.76593	up
ENSG00000146757	ZNF92	783.275	2.80903	0.253813	11.0673	1.80777e-28	2.88373e-26	2.75156	up
ENSG00000133710	SPINK5	92.4356	3.11917	0.667461	4.67319	2.9656e-06	2.54257e-05	2.74317	up
ENSG00000148143	ZNF462	311.398	2.82918	0.319534	8.85408	8.43796e-19	5.03834e-17	2.73931	up
ENSG00000158636	EMSY	443.647	2.85278	0.363106	7.8566	3.947e-15	1.59147e-13	2.73896	up
ENSG00000171488	LRRC8C	109.547	2.9007	0.435795	6.65611	2.81163e-11	6.41393e-10	2.73802	up
ENSG00000139117	CPNE8	68.1002	3.07158	0.631144	4.86668	1.1349e-06	1.08212e-05	2.72627	up
ENSG00000099377	HSD3B7	26.6815	4.58903	1.57523	2.91325	0.0035769	0.0126182	2.72118	up
ENSG00000115306	SPTBN1	564.571	2.76846	0.242632	11.4101	3.72128e-30	6.66597e-28	2.71942	up
ENSG00000166833	NAV2	49.8274	2.93367	0.525885	5.57854	2.42539e-08	3.28202e-07	2.71338	up
ENSG00000101639	CEP192	302.376	2.82742	0.384502	7.35347	1.93128e-13	6.13461e-12	2.70184	up
ENSG00000101752	MIB1	474.665	2.8202	0.385653	7.3128	2.61633e-13	8.14491e-12	2.69418	up
ENSG00000148840	PPRC1	417.036	2.81405	0.376946	7.46539	8.30559e-14	2.78818e-12	2.69347	up
ENSG00000283907		38.3735	3.21338	0.876396	3.66659	0.000245809	0.00125483	2.69115	up
ENSG00000091073	DTX2	193.085	2.84127	0.442587	6.41969	1.36552e-10	2.77085e-09	2.67996	up
ENSG00000184661	CDCA2	732.858	2.76751	0.323109	8.56525	1.0784e-17	5.74815e-16	2.67934	up
ENSG00000240563	L1TD1	3099.9	2.93093	0.485911	6.03183	1.62115e-09	2.72319e-08	2.67272	up
ENSG00000125266	EFNB2	72.9594	2.94865	0.584232	5.04705	4.48693e-07	4.65706e-06	2.67202	up
ENSG00000253159	PCDHGA12	15.5397	4.21736	1.53597	2.74573	0.00603762	0.0196232	2.66892	up
ENSG00000080200	CRYBG3	75.373	3.04865	0.68296	4.46389	8.04864e-06	6.17175e-05	2.66311	up
ENSG00000198933	TBKBP1	252.129	2.87	0.504884	5.68447	1.31218e-08	1.86452e-07	2.66233	up
ENSG00000101773	RBBP8	1220.58	2.70284	0.264444	10.2208	1.59997e-24	1.73098e-22	2.64388	up
ENSG00000272275		11.778	3.80775	1.37331	2.77268	0.00555966	0.0183508	2.63784	up
ENSG00000077943	ITGA8	4.75095	3.88451	1.57515	2.46613	0.0136584	0.0385529	2.63256	up
ENSG00000099381	SETD1A	151.126	2.74675	0.384659	7.14075	9.28244e-13	2.67271e-11	2.6251	up
ENSG00000112139	MDGA1	37.2029	3.41338	1.04909	3.25366	0.00113927	0.00477058	2.6209	up
ENSG00000183691	NOG	44.3942	3.42024	1.0574	3.23456	0.00121832	0.00506469	2.62067	up
ENSG00000130396	AFDN	392.617	2.72079	0.357345	7.6139	2.65954e-14	9.60687e-13	2.61719	up
ENSG00000214925	RPL36AP52	19.7016	3.55365	1.07684	3.30007	0.000966615	0.00414042	2.61688	up
ENSG00000101210	EEF1A2	952.918	2.67938	0.280042	9.56779	1.09215e-21	9.19551e-20	2.61491	up
ENSG00000286542		8.78385	4.84049	1.97131	2.45546	0.0140702	0.039503	2.60776	up
ENSG00000130522	JUND	496.744	2.8064	0.495304	5.66603	1.46148e-08	2.06193e-07	2.60748	up
ENSG00000184056	VPS33B	48.2961	2.91425	0.626862	4.64895	3.33627e-06	2.81727e-05	2.60419	up
ENSG00000138246	DNAJC13	200.14	2.71116	0.372998	7.26857	3.6331e-13	1.09514e-11	2.59815	up
ENSG00000250471	GMPSP1	11.858	3.36727	1.01988	3.30163	0.000961233	0.00412544	2.59644	up
ENSG00000145675	PIK3R1	67.8889	2.85854	0.558443	5.11877	3.07531e-07	3.3189e-06	2.59259	up
ENSG00000134363	FST	29.1955	3.23791	0.889632	3.6396	0.00027306	0.00137302	2.59169	up
ENSG00000183337	BCOR	919.908	2.6511	0.276626	9.58369	9.36409e-22	7.96275e-20	2.58896	up
ENSG00000148832	PAOX	18.8267	3.43243	1.08626	3.15985	0.0015785	0.00630881	2.5774	up
ENSG00000213707	HMGB1P10	30.4811	3.30579	0.98955	3.34071	0.000835658	0.00365177	2.57579	up
ENSG00000271781		8.97091	5.43996	1.91291	2.84381	0.0044577	0.0152074	2.5746	up
ENSG00000288829		19.3982	3.27041	0.943196	3.46737	0.000525577	0.00243812	2.56707	up
ENSG00000131503	ANKHD1	119.111	2.69053	0.404203	6.65638	2.80657e-11	6.40906e-10	2.56682	up
ENSG00000156650	KAT6B	278.547	2.65405	0.337841	7.85591	3.96866e-15	1.59721e-13	2.56165	up
ENSG00000100393	EP300	340.464	2.67951	0.383282	6.99096	2.73017e-12	7.34792e-11	2.56154	up
ENSG00000123104	ITPR2	198.511	2.62512	0.295181	8.89325	5.93451e-19	3.5926e-17	2.55896	up
ENSG00000146828	SLC12A9	127.115	2.685	0.403455	6.655	2.83291e-11	6.45573e-10	2.55786	up
ENSG00000237289	CKMT1B	50.1441	2.86014	0.571357	5.00587	5.56102e-07	5.67634e-06	2.55211	up
ENSG00000154310	TNIK	143.28	2.74457	0.486489	5.64158	1.68496e-08	2.35141e-07	2.55133	up
ENSG00000170162	VGLL2	35.9017	2.90531	0.693758	4.18779	2.8169e-05	0.000188373	2.54791	up
ENSG00000174197	MGA	377.52	2.6272	0.316318	8.30558	9.93299e-17	4.83464e-15	2.5464	up
ENSG00000055609	KMT2C	404.804	2.63684	0.337369	7.81588	5.45792e-15	2.15302e-13	2.54596	up
ENSG00000213445	SIPA1	312.193	2.6165	0.301495	8.67839	4.01412e-18	2.25513e-16	2.54439	up
ENSG00000100092	SH3BP1	60.2407	2.80462	0.589768	4.75547	1.97986e-06	1.77182e-05	2.54118	up
ENSG00000070601	FRMPD1	31.1119	2.96183	0.751117	3.94323	8.03906e-05	0.0004724	2.53363	up
ENSG00000171634	BPTF	1245.09	2.59002	0.279565	9.26445	1.96091e-20	1.40504e-18	2.5273	up
ENSG00000173175	ADCY5	41.5973	2.8711	0.702558	4.08664	4.37668e-05	0.000278451	2.52725	up
ENSG00000165521	EML5	18.7511	3.45929	1.02076	3.38892	0.000701689	0.00313658	2.52377	up
ENSG00000100968	NFATC4	168.314	2.68261	0.464213	5.77883	7.52221e-09	1.11678e-07	2.51933	up
ENSG00000271254		11.2256	3.94426	1.3777	2.86293	0.00419742	0.0144526	2.51369	up
ENSG00000085982	USP40	288.787	2.65746	0.431408	6.15997	7.27567e-10	1.29586e-08	2.51292	up
ENSG00000286058		15.3477	3.0965	0.902286	3.43184	0.000599497	0.00273744	2.51067	up
ENSG00000165959	CLMN	145.996	2.6387	0.430201	6.13364	8.58922e-10	1.50955e-08	2.50113	up
ENSG00000167992	VWCE	113.007	2.5894	0.344219	7.52254	5.37233e-14	1.84893e-12	2.49757	up
ENSG00000265683	SYPL1P2	17.9016	4.24446	1.56336	2.71495	0.00662851	0.0211752	2.49395	up
ENSG00000259291	ZNF710-AS1	33.2338	3.30558	1.04697	3.1573	0.00159238	0.0063515	2.49263	up
ENSG00000152582	SPEF2	110.365	2.81644	0.636114	4.42758	9.52964e-06	7.18636e-05	2.49223	up
ENSG00000107719	PALD1	279.743	2.58523	0.356887	7.24384	4.36142e-13	1.30033e-11	2.48668	up
ENSG00000129245	FXR2	227.317	2.70785	0.535551	5.05619	4.27726e-07	4.4725e-06	2.48351	up
ENSG00000105409	ATP1A3	78.3295	2.75932	0.61491	4.48736	7.2111e-06	5.59033e-05	2.48269	up
ENSG00000138670	RASGEF1B	25.4792	3.41759	1.17884	2.89913	0.00374205	0.0131077	2.47984	up
ENSG00000118898	PPL	59.7981	2.96023	0.798294	3.7082	0.00020874	0.00109212	2.47758	up
ENSG00000196586	MYO6	543.612	2.57391	0.355373	7.24284	4.39396e-13	1.30825e-11	2.47623	up
ENSG00000106624	AEBP1	370.145	2.54001	0.311327	8.15865	3.3878e-16	1.53604e-14	2.46651	up
ENSG00000033867	SLC4A7	341.413	2.50304	0.221836	11.2833	1.58671e-29	2.64701e-27	2.46616	up
ENSG00000154930	ACSS1	240.385	2.61522	0.451576	5.79131	6.98391e-09	1.04111e-07	2.46398	up
ENSG00000188730	VWC2	39.4739	4.0882	1.43482	2.84927	0.00438197	0.0149935	2.45464	up
ENSG00000178235	SLITRK1	5.97746	4.54504	1.65792	2.74142	0.00611746	0.0198435	2.45432	up
ENSG00000140836	ZFHX3	768.771	2.54211	0.337137	7.54029	4.6894e-14	1.6267e-12	2.45391	up
ENSG00000076201	PTPN23	189.577	2.60622	0.453333	5.74901	8.97655e-09	1.31308e-07	2.4525	up
ENSG00000097096	SYDE2	55.1114	3.1062	0.899891	3.45175	0.00055696	0.00256789	2.4492	up
ENSG00000272077		17.7163	4.49778	1.65729	2.71393	0.00664893	0.0212364	2.44756	up
ENSG00000163788	SNRK	124.212	2.60872	0.472172	5.52493	3.29618e-08	4.33422e-07	2.44039	up
ENSG00000124789	NUP153	307.686	2.55851	0.40328	6.34425	2.23516e-10	4.36916e-09	2.43483	up
ENSG00000143126	CELSR2	131.027	2.53739	0.370271	6.85279	7.24209e-12	1.81085e-10	2.43355	up
ENSG00000237268		58.0871	2.81804	0.701887	4.01494	5.94601e-05	0.000363027	2.43316	up
ENSG00000107957	SH3PXD2A	94.8188	2.59668	0.454062	5.71878	1.07289e-08	1.54561e-07	2.43113	up
ENSG00000162676	GFI1	93.416	2.75965	0.675322	4.08643	4.38064e-05	0.000278541	2.42773	up
ENSG00000173546	CSPG4	132.439	2.73316	0.656214	4.16504	3.11298e-05	0.000205892	2.42679	up
ENSG00000179588	ZFPM1	47.4005	2.76046	0.705274	3.91402	9.07716e-05	0.000525907	2.42446	up
ENSG00000067840	PDZD4	189.018	2.58701	0.475052	5.44574	5.15918e-08	6.54755e-07	2.42181	up
ENSG00000279332		11.4857	4.16788	1.70452	2.4452	0.0144774	0.0404434	2.41929	up
ENSG00000231609	EHBP1-AS1	39.759	2.87439	0.791608	3.63108	0.000282233	0.00141239	2.41546	up
ENSG00000127528	KLF2	15.4428	3.87454	1.4857	2.60789	0.00911015	0.0275905	2.41514	up
ENSG00000176058	TPRN	279.342	2.52005	0.377939	6.66787	2.59536e-11	5.96415e-10	2.41325	up
ENSG00000075539	FRYL	195.905	2.50596	0.356696	7.02547	2.13346e-12	5.82081e-11	2.41223	up
ENSG00000269973		74.362	2.82107	0.732205	3.85284	0.000116758	0.000657296	2.4075	up
ENSG00000104967	NOVA2	46.4498	2.72873	0.67853	4.02153	5.78222e-05	0.000354628	2.40603	up
ENSG00000168930	TRIM49	70.8226	3.13876	0.791234	3.96691	7.28103e-05	0.000433333	2.40531	up
ENSG00000123066	MED13L	561.234	2.46084	0.270481	9.098	9.20129e-20	6.04016e-18	2.405	up
ENSG00000151276	MAGI1	266.973	2.51511	0.38537	6.52647	6.73359e-11	1.4427e-09	2.40394	up
ENSG00000138829	FBN2	593.301	2.47435	0.313823	7.88455	3.15665e-15	1.29186e-13	2.40095	up
ENSG00000166888	STAT6	55.2826	2.63462	0.569591	4.62545	3.7379e-06	3.12025e-05	2.4005	up
ENSG00000103264	FBXO31	133.641	2.51036	0.3954	6.34891	2.16844e-10	4.24633e-09	2.39477	up
ENSG00000096696	DSP	399.59	2.49668	0.373857	6.67817	2.41938e-11	5.59505e-10	2.39217	up
ENSG00000118946	PCDH17	123.346	2.58859	0.507393	5.10175	3.36526e-07	3.61397e-06	2.38903	up
ENSG00000274383		5.17289	4.95189	1.76178	2.81073	0.00494285	0.0165854	2.38871	up
ENSG00000146232	NFKBIE	146.447	2.79046	0.752927	3.70616	0.000210429	0.00109938	2.38294	up
ENSG00000115419	GLS	143.736	2.48873	0.371236	6.7039	2.02933e-11	4.7636e-10	2.38123	up
ENSG00000163499	CRYBA2	43.3602	3.73121	1.35036	2.76312	0.00572522	0.0188007	2.37908	up
ENSG00000082516	GEMIN5	292.76	2.46158	0.337296	7.29798	2.92113e-13	8.99845e-12	2.37609	up
ENSG00000151835	SACS	483.998	2.52298	0.437711	5.76403	8.21312e-09	1.2095e-07	2.37409	up
ENSG00000288765		37.3664	2.60422	0.581158	4.48109	7.42633e-06	5.74496e-05	2.37147	up
ENSG00000135519	KCNH3	101.287	2.62285	0.594886	4.409	1.03848e-05	7.77488e-05	2.36918	up
ENSG00000095203	EPB41L4B	87.4654	2.45463	0.364522	6.73383	1.65251e-11	3.92544e-10	2.36344	up
ENSG00000166501	PRKCB	102.972	2.60935	0.59931	4.35392	1.33722e-05	9.72501e-05	2.36303	up
ENSG00000273387		7.86957	3.92357	1.6318	2.40443	0.0161975	0.0444196	2.36159	up
ENSG00000119777	TMEM214	196.727	2.52138	0.475655	5.30086	1.1526e-07	1.36303e-06	2.35913	up
ENSG00000124920	MYRF	127.865	2.54189	0.510084	4.98328	6.25157e-07	6.29546e-06	2.35881	up
ENSG00000225280		46.2844	2.59921	0.584198	4.4492	8.61919e-06	6.55406e-05	2.35871	up
ENSG00000120733	KDM3B	377.457	2.46966	0.397673	6.21029	5.28882e-10	9.63985e-09	2.35335	up
ENSG00000117713	ARID1A	758.255	2.40244	0.27042	8.88412	6.44298e-19	3.88964e-17	2.34868	up
ENSG00000127152	BCL11B	83.9029	2.59517	0.59183	4.385	1.15988e-05	8.58385e-05	2.346	up
ENSG00000080603	SRCAP	30.803	2.77862	0.782945	3.54893	0.000386797	0.00186437	2.34468	up
ENSG00000274712		42.0186	2.64875	0.676492	3.91542	9.02483e-05	0.000523292	2.34362	up
ENSG00000019102	VSIG2	25.5757	2.78946	0.853126	3.26969	0.00107666	0.00454324	2.33965	up
ENSG00000199480	RNA5SP389	68.1003	2.54259	0.533442	4.76638	1.87561e-06	1.69029e-05	2.33878	up
ENSG00000169891	REPS2	40.1825	2.61024	0.642319	4.06378	4.82853e-05	0.000304188	2.33791	up
ENSG00000174953	DHX36	966.382	2.39509	0.279994	8.55411	1.18786e-17	6.31618e-16	2.33698	up
ENSG00000214530	STARD10	287.047	2.4609	0.416581	5.90738	3.47596e-09	5.49267e-08	2.33556	up
ENSG00000162148	PPP1R32	14.9135	3.31813	1.26927	2.61419	0.0089439	0.0271681	2.3348	up
ENSG00000258634		32.8988	2.72534	0.736313	3.70133	0.000214474	0.00111704	2.33097	up
ENSG00000273568		18.7333	2.83947	0.893726	3.17711	0.0014875	0.00599774	2.32976	up
ENSG00000186918	ZNF395	218.139	2.46705	0.438088	5.63141	1.78739e-08	2.48011e-07	2.3294	up
ENSG00000279331	RBM12B-AS1	16.6999	2.91892	1.01256	2.88271	0.00394274	0.0136894	2.32901	up
ENSG00000272779	BMS1P20	8.16694	3.04765	1.11041	2.74461	0.00605829	0.0196816	2.32466	up
ENSG00000250366	TUNAR	37.4905	2.76057	0.737714	3.74206	0.000182519	0.00096909	2.3246	up
ENSG00000275074	NUDT18	46.4107	2.97543	0.991161	3.00196	0.00268246	0.00993031	2.32292	up
ENSG00000161682	FAM171A2	202.931	2.49162	0.493565	5.0482	4.45986e-07	4.63461e-06	2.3193	up
ENSG00000180530	NRIP1	148.331	2.53214	0.548224	4.61882	3.85936e-06	3.20937e-05	2.31463	up
ENSG00000108256	NUFIP2	354.398	2.44155	0.417355	5.85005	4.91433e-09	7.53141e-08	2.31402	up
ENSG00000139618	BRCA2	621.278	2.40806	0.366916	6.56296	5.27509e-11	1.15052e-09	2.30848	up
ENSG00000224051	CPTP	139.453	2.45359	0.453974	5.4047	6.49168e-08	8.06992e-07	2.30847	up
ENSG00000132613	MTSS2	26.644	2.78337	0.842158	3.30505	0.000949598	0.0040796	2.30536	up
ENSG00000165392	WRN	183.743	2.40993	0.380655	6.33099	2.43594e-10	4.73043e-09	2.30534	up
ENSG00000280152		7.72899	5.46157	2.26884	2.40721	0.0160749	0.0441498	2.30355	up
ENSG00000173473	SMARCC1	2102.37	2.3314	0.196684	11.8536	2.06226e-32	4.06023e-30	2.30326	up
ENSG00000156103	MMP16	142.145	2.50985	0.529699	4.73826	2.15565e-06	1.9158e-05	2.30307	up
ENSG00000235961	PNMA6A	287.508	2.35787	0.282136	8.35718	6.42329e-17	3.1976e-15	2.3016	up
ENSG00000169184	MN1	61.2145	2.56359	0.606877	4.22424	2.39751e-05	0.000162769	2.30157	up
ENSG00000141582	CBX4	258.878	2.44	0.446959	5.45912	4.7851e-08	6.10826e-07	2.30024	up
ENSG00000170561	IRX2	442.728	2.38347	0.346787	6.87301	6.28593e-12	1.59736e-10	2.2967	up
ENSG00000078177	N4BP2	415.125	2.354	0.279588	8.41954	3.77971e-17	1.92545e-15	2.29618	up
ENSG00000065526	SPEN	332.944	2.35391	0.292479	8.04815	8.40549e-16	3.66654e-14	2.2913	up
ENSG00000106571	GLI3	150.126	2.4284	0.442618	5.48645	4.10094e-08	5.30446e-07	2.291	up
ENSG00000111860	CEP85L	122.417	2.57029	0.606704	4.23648	2.27052e-05	0.000155208	2.28885	up
ENSG00000239486		6.3763	4.83463	1.92926	2.50595	0.0122121	0.0350886	2.28728	up
ENSG00000170667	RASA4B	9.33338	3.13567	1.28359	2.44288	0.0145705	0.040682	2.28594	up
ENSG00000188215	DCUN1D3	47.4996	2.62031	0.722198	3.62824	0.000285359	0.0014264	2.28157	up
ENSG00000139734	DIAPH3	525.927	2.32636	0.250117	9.30109	1.39018e-20	1.01609e-18	2.28087	up
ENSG00000289811	FAM95A	80.5932	2.40652	0.435319	5.52817	3.23588e-08	4.26006e-07	2.2798	up
ENSG00000127311	HELB	51.2928	2.58324	0.660603	3.91043	9.2133e-05	0.00053323	2.27571	up
ENSG00000100592	DAAM1	1293.5	2.37498	0.368731	6.44095	1.18725e-10	2.4317e-09	2.27471	up
ENSG00000148411	NACC2	155.754	2.57979	0.647685	3.98309	6.8024e-05	0.000408406	2.27078	up
ENSG00000198561	CTNND1	38.2966	2.54703	0.607426	4.19316	2.75099e-05	0.000184474	2.27071	up
ENSG00000033178	UBA6	475.537	2.31595	0.254078	9.11511	7.85905e-20	5.22042e-18	2.26899	up
ENSG00000117480	FAAH	97.6603	2.49523	0.58582	4.25937	2.05003e-05	0.000141956	2.26865	up
ENSG00000214960	CRPPA	13.1269	3.54826	1.4283	2.48425	0.0129824	0.0369288	2.26859	up
ENSG00000128641	MYO1B	309.933	2.36077	0.364322	6.47991	9.17765e-11	1.92115e-09	2.26634	up
ENSG00000083857	FAT1	257.995	2.32302	0.287943	8.06763	7.16755e-16	3.15806e-14	2.26495	up
ENSG00000173273	TNKS	365.102	2.341	0.329954	7.09492	1.29426e-12	3.61699e-11	2.2634	up
ENSG00000179094	PER1	148.739	2.40011	0.443169	5.41579	6.10203e-08	7.63381e-07	2.26223	up
ENSG00000244405	ETV5	23.5231	2.95097	0.972019	3.03592	0.00239802	0.00903559	2.26173	up
ENSG00000100888	CHD8	506.023	2.30334	0.250179	9.20677	3.36091e-20	2.33915e-18	2.25915	up
ENSG00000187764	SEMA4D	169.616	2.36211	0.388343	6.08254	1.18296e-09	2.03883e-08	2.25837	up
ENSG00000168036	CTNNB1	2273.89	2.35076	0.359596	6.53722	6.2671e-11	1.35337e-09	2.25763	up
ENSG00000149091	DGKZ	288.966	2.33162	0.32929	7.08075	1.4338e-12	3.98149e-11	2.25615	up
ENSG00000166126	AMN	57.2793	2.82695	0.88447	3.19621	0.00139246	0.0056626	2.25612	up
ENSG00000111199	TRPV4	50.5832	2.8846	0.982376	2.93635	0.00332096	0.01189	2.25543	up
ENSG00000241058	NSUN6	301.421	2.31495	0.297015	7.79407	6.48843e-15	2.52053e-13	2.25315	up
ENSG00000189410	SH2D5	129.024	2.37582	0.428482	5.54473	2.94406e-08	3.92553e-07	2.25133	up
ENSG00000112659	CUL9	66.455	2.67994	0.808317	3.31545	0.000914941	0.00394926	2.24965	up
ENSG00000167912	TOX-DT	66.7982	4.07206	1.5665	2.59947	0.00933681	0.0281518	2.24894	up
ENSG00000109794	FAM149A	95.1901	2.43653	0.535655	4.5487	5.39781e-06	4.32577e-05	2.24845	up
ENSG00000143442	POGZ	548.782	2.3011	0.276609	8.31899	8.8718e-17	4.34718e-15	2.24725	up
ENSG00000146247	PHIP	1297.07	2.29625	0.263917	8.70067	3.29919e-18	1.87762e-16	2.24659	up
ENSG00000262246	CORO7	144.396	2.33464	0.369386	6.32033	2.6101e-10	5.03452e-09	2.24407	up
ENSG00000068078	FGFR3	176.801	2.3559	0.403487	5.83885	5.25635e-09	7.99947e-08	2.24377	up
ENSG00000032219	ARID4A	291.322	2.2937	0.274665	8.35088	6.77587e-17	3.34266e-15	2.24101	up
ENSG00000166750	SLFN5	17.8843	3.23452	1.18983	2.71847	0.00655839	0.0210034	2.23995	up
ENSG00000114268	PFKFB4	89.8595	2.44698	0.561077	4.36121	1.29342e-05	9.42843e-05	2.23681	up
ENSG00000009954	BAZ1B	1263.32	2.28503	0.27694	8.25099	1.57084e-16	7.52832e-15	2.23092	up
ENSG00000145819	ARHGAP26	56.9964	2.68614	0.828795	3.24102	0.00119103	0.0049645	2.22673	up
ENSG00000151779	NBAS	321.355	2.31865	0.36774	6.30514	2.87939e-10	5.51501e-09	2.22572	up
ENSG00000112893	MAN2A1	266.915	2.28166	0.284166	8.02932	9.80114e-16	4.20813e-14	2.22555	up
ENSG00000089639	GMIP	73.9827	2.55202	0.6796	3.75518	0.000173215	0.00092667	2.22516	up
ENSG00000153815	CMIP	173.146	2.33464	0.401291	5.81781	5.9625e-09	9.01138e-08	2.22489	up
ENSG00000234297	PSIP1P1	17.5414	2.57273	0.754583	3.40948	0.000650869	0.00293825	2.22194	up
ENSG00000115760	BIRC6	387.648	2.33337	0.403268	5.78616	7.20141e-09	1.07207e-07	2.21923	up
ENSG00000177732	SOX12	634.263	2.28521	0.315892	7.23413	4.68525e-13	1.3893e-11	2.21666	up
ENSG00000177000	MTHFR	96.5003	2.47781	0.629782	3.93439	8.34077e-05	0.000487638	2.21646	up
ENSG00000288966		18.3093	3.17078	1.16782	2.71514	0.00662478	0.0211664	2.21547	up
ENSG00000165895	ARHGAP42	50.9397	2.52263	0.681704	3.70047	0.000215201	0.00112056	2.21392	up
ENSG00000163694	RBM47	45.54	2.6495	0.781491	3.39032	0.000698119	0.00312253	2.21275	up
ENSG00000130544	ZNF557	152.474	2.42867	0.569774	4.26253	2.02129e-05	0.000140188	2.20822	up
ENSG00000198300	PEG3	24.9192	2.88746	0.884842	3.26324	0.00110145	0.00463618	2.20549	up
ENSG00000091129	NRCAM	47.2515	2.64797	0.816328	3.24376	0.00117962	0.00492069	2.20443	up
ENSG00000251689		12.0864	3.35417	1.31954	2.54192	0.0110245	0.0322616	2.20432	up
ENSG00000104093	DMXL2	250.185	2.28042	0.340266	6.70187	2.05765e-11	4.81971e-10	2.20243	up
ENSG00000100084	HIRA	207.675	2.30943	0.40051	5.76621	8.10747e-09	1.19636e-07	2.19956	up
ENSG00000185551	NR2F2	250.433	2.25186	0.275945	8.16056	3.33473e-16	1.52026e-14	2.19944	up
ENSG00000270059		6.42128	6.109	2.38097	2.56576	0.0102949	0.0305067	2.19729	up
ENSG00000259482	RORA-AS2	223.727	10.5204	3.02078	3.48268	0.000496429	0.00231915	2.19248	up
ENSG00000131773	KHDRBS3	252.682	2.28455	0.3687	6.19622	5.78344e-10	1.04715e-08	2.19228	up
ENSG00000106004	HOXA5	61.4729	2.48225	0.656296	3.78221	0.00015544	0.000842553	2.19163	up
ENSG00000183684	ALYREF	2447.6	2.2295	0.243799	9.14484	5.97188e-20	4.04054e-18	2.18837	up
ENSG00000203867	RBM20	72.337	2.38969	0.520987	4.58685	4.49989e-06	3.66943e-05	2.18592	up
ENSG00000183826	BTBD9	38.4035	2.47551	0.67616	3.66113	0.000251108	0.0012774	2.18541	up
ENSG00000186654	PRR5	140.016	2.31379	0.453555	5.10145	3.37062e-07	3.61796e-06	2.17887	up
ENSG00000139116	KIF21A	511.325	2.22254	0.249197	8.9188	4.71357e-19	2.86937e-17	2.17843	up
ENSG00000148773	MKI67	663.888	2.2475	0.318462	7.05736	1.69694e-12	4.68836e-11	2.17832	up
ENSG00000103047	TANGO6	139.675	2.39187	0.566002	4.22591	2.37978e-05	0.000161715	2.17801	up
ENSG00000101115	SALL4	287.32	2.23354	0.282493	7.90652	2.64686e-15	1.09347e-13	2.17782	up
ENSG00000171467	ZNF318	153.267	2.25329	0.343008	6.5692	5.05847e-11	1.10658e-09	2.17543	up
ENSG00000161904	LEMD2	847.333	2.29974	0.428496	5.36701	8.00519e-08	9.77895e-07	2.17494	up
ENSG00000170145	SIK2	114.989	2.35079	0.515695	4.55849	5.1522e-06	4.15178e-05	2.17269	up
ENSG00000049323	LTBP1	101.312	2.38701	0.574395	4.1557	3.24295e-05	0.000213147	2.1714	up
ENSG00000155275	TRMT44	67.464	2.36895	0.545933	4.33928	1.42952e-05	0.000103241	2.17112	up
ENSG00000138688	KIAA1109	196.183	2.31039	0.448897	5.1468	2.64962e-07	2.89379e-06	2.17085	up
ENSG00000104812	GYS1	217.549	2.24698	0.341056	6.5883	4.449e-11	9.82107e-10	2.16885	up
ENSG00000079432	CIC	122.351	2.34286	0.510211	4.59195	4.39131e-06	3.59699e-05	2.16848	up
ENSG00000128596	CCDC136	94.2754	2.31753	0.483708	4.79118	1.65807e-06	1.51596e-05	2.16658	up
ENSG00000147912	FBXO10	36.7687	2.5833	0.792076	3.26143	0.00110852	0.00466146	2.16569	up
ENSG00000014138	POLA2	276.341	2.2253	0.297427	7.48185	7.32817e-14	2.48294e-12	2.16479	up
ENSG00000065328	MCM10	636.153	2.18477	0.172948	12.6325	1.39747e-36	4.01847e-34	2.16421	up
ENSG00000178104	PDE4DIP	184.484	2.28113	0.411513	5.54328	2.96863e-08	3.95106e-07	2.1633	up
ENSG00000159256	MORC3	93.3784	2.39828	0.600793	3.99186	6.55568e-05	0.000395658	2.16325	up
ENSG00000001617	SEMA3F	68.9323	2.40265	0.605035	3.97109	7.15447e-05	0.000427079	2.16267	up
ENSG00000198910	L1CAM	25.7793	2.60064	0.816921	3.18347	0.00145524	0.00588394	2.15939	up
ENSG00000124496	TRERF1	153.354	2.26334	0.399007	5.67242	1.40791e-08	1.98763e-07	2.15833	up
ENSG00000148158	SNX30	171.924	2.31283	0.477267	4.84599	1.2598e-06	1.18467e-05	2.15735	up
ENSG00000132688	NES	768.931	2.20329	0.257212	8.56604	1.071e-17	5.72267e-16	2.15708	up
ENSG00000049618	ARID1B	547.229	2.20783	0.277324	7.9612	1.70382e-15	7.13318e-14	2.15584	up
ENSG00000076108	BAZ2A	454.092	2.18843	0.223469	9.79299	1.20668e-22	1.09878e-20	2.15486	up
ENSG00000073614	KDM5A	513.111	2.18713	0.222481	9.83062	8.31024e-23	7.69542e-21	2.15344	up
ENSG00000250420	AACSP1	91.6966	2.29434	0.468842	4.89363	9.8994e-07	9.5515e-06	2.15326	up
ENSG00000196642	RABL6	1135.95	2.20884	0.291154	7.58648	3.28705e-14	1.17186e-12	2.1517	up
ENSG00000174231	PRPF8	1089.78	2.19033	0.237562	9.22001	2.97066e-20	2.0808e-18	2.15133	up
ENSG00000137218	FRS3	18.3237	2.53905	0.829816	3.05977	0.00221508	0.0084291	2.14784	up
ENSG00000074181	NOTCH3	327.345	2.20251	0.289357	7.61175	2.70406e-14	9.74066e-13	2.14718	up
ENSG00000177084	POLE	318.235	2.1992	0.287567	7.64759	2.04788e-14	7.53441e-13	2.14371	up
ENSG00000244165	P2RY11	45.9407	2.34763	0.566113	4.14692	3.36977e-05	0.000220488	2.14276	up
ENSG00000064687	ABCA7	195.861	2.28214	0.450594	5.06473	4.08984e-07	4.29709e-06	2.14273	up
ENSG00000073169	SELENOO	169.505	2.18125	0.257497	8.47096	2.4338e-17	1.25444e-15	2.13953	up
ENSG00000147133	TAF1	172.695	2.21855	0.34691	6.39516	1.60376e-10	3.20078e-09	2.1394	up
ENSG00000128591	FLNC	337.211	2.19297	0.285765	7.67401	1.66701e-14	6.18657e-13	2.13865	up
ENSG00000180900	SCRIB	330.172	2.21599	0.342416	6.47164	9.6943e-11	2.01771e-09	2.13758	up
ENSG00000111275	ALDH2	50.4791	2.77873	0.950944	2.92207	0.00347709	0.0123285	2.13644	up
ENSG00000277443	MARCKS	1599.78	2.19388	0.292575	7.49852	6.45422e-14	2.19705e-12	2.13596	up
ENSG00000108819	PPP1R9B	115.898	2.306	0.520565	4.42981	9.43147e-06	7.1197e-05	2.13459	up
ENSG00000250753		3.96709	5.03686	2.03265	2.47797	0.0132131	0.0374816	2.13332	up
ENSG00000137812	KNL1	318.49	2.29206	0.480816	4.76703	1.86958e-06	1.68625e-05	2.13234	up
ENSG00000143434	SEMA6C	59.7797	2.31205	0.549102	4.2106	2.54694e-05	0.00017174	2.12792	up
ENSG00000188786	MTF1	83.139	2.28002	0.466905	4.88326	1.04345e-06	1.00324e-05	2.12763	up
ENSG00000032444	PNPLA6	271.465	2.2025	0.339297	6.49137	8.50614e-11	1.79955e-09	2.12734	up
ENSG00000142544	CTU1	74.9794	2.33082	0.583983	3.99125	6.57263e-05	0.000396462	2.12646	up
ENSG00000182197	EXT1	158.959	2.25976	0.447173	5.05343	4.33936e-07	4.53093e-06	2.12445	up
ENSG00000163104	SMARCAD1	310.613	2.21326	0.359125	6.16293	7.14094e-10	1.27588e-08	2.12431	up
ENSG00000172046	USP19	232.424	2.22662	0.400536	5.55909	2.71191e-08	3.63819e-07	2.12265	up
ENSG00000268129		6.55222	2.98978	1.2438	2.40375	0.0162277	0.0444799	2.12233	up
ENSG00000126749	EMG1	330.647	2.18061	0.298466	7.30607	2.75074e-13	8.51483e-12	2.12144	up
ENSG00000089159	PXN	122.8	2.27477	0.486823	4.67269	2.9728e-06	2.54749e-05	2.1214	up
ENSG00000104983	CCDC61	121.356	2.24638	0.440491	5.09971	3.4017e-07	3.64594e-06	2.1214	up
ENSG00000007202	KIAA0100	323.878	2.17216	0.275608	7.88136	3.23842e-15	1.32285e-13	2.12135	up
ENSG00000287759		5.57402	5.74181	2.25314	2.54836	0.0108231	0.0317572	2.12116	up
ENSG00000198604	BAZ1A	996.757	2.16509	0.255143	8.48578	2.14271e-17	1.10964e-15	2.12102	up
ENSG00000171316	CHD7	767.509	2.16631	0.264215	8.19905	2.42291e-16	1.1382e-14	2.11943	up
ENSG00000260423	LINC02367	10.7027	3.01147	1.1751	2.56274	0.0103851	0.0307279	2.11903	up
ENSG00000155657	TTN	19.7101	2.76914	0.968877	2.85809	0.00426198	0.0146471	2.11828	up
ENSG00000250067	YJEFN3	31.7044	2.3851	0.646109	3.69148	0.000222953	0.00115515	2.11677	up
ENSG00000240445	FOXO3B	28.3417	2.40579	0.630401	3.81629	0.000135475	0.00074802	2.11663	up
ENSG00000184160	ADRA2C	257.069	2.21775	0.401759	5.52009	3.38822e-08	4.44454e-07	2.11588	up
ENSG00000169871	TRIM56	20.4468	3.16591	1.28975	2.45468	0.0141011	0.0395749	2.11459	up
ENSG00000274561		12.8933	3.8009	1.61357	2.35558	0.0184938	0.0494511	2.11226	up
ENSG00000141314	RHBDL3	53.7109	2.23837	0.448671	4.98889	6.07275e-07	6.14132e-06	2.11204	up
ENSG00000107099	DOCK8	20.3495	3.29577	1.36708	2.41081	0.0159173	0.0437995	2.10996	up
ENSG00000064309	CDON	49.6198	2.49577	0.772911	3.22905	0.00124201	0.00514851	2.10876	up
ENSG00000140443	IGF1R	561.165	2.15944	0.276521	7.80931	5.75009e-15	2.25202e-13	2.10866	up
ENSG00000142686	C1orf216	77.5376	2.25387	0.482131	4.6748	2.94239e-06	2.52764e-05	2.10842	up
ENSG00000276529		140.341	2.2681	0.493301	4.59779	4.26987e-06	3.51159e-05	2.10817	up
ENSG00000119596	YLPM1	339.091	2.22704	0.425429	5.23482	1.65144e-07	1.89055e-06	2.10712	up
ENSG00000130749	ZC3H4	192.09	2.20374	0.389336	5.66027	1.51136e-08	2.12544e-07	2.10578	up
ENSG00000104687	GSR	356.08	2.22524	0.429607	5.17971	2.22231e-07	2.47409e-06	2.10434	up
ENSG00000134709	HOOK1	138.437	2.37978	0.628664	3.78545	0.000153428	0.000834084	2.10378	up
ENSG00000140691	ARMC5	204.653	2.21923	0.427812	5.18739	2.13265e-07	2.38034e-06	2.10197	up
ENSG00000206190	ATP10A	141.851	2.31663	0.595438	3.89064	9.99815e-05	0.000572138	2.10077	up
ENSG00000160469	BRSK1	27.2527	2.40481	0.695116	3.45959	0.000541002	0.00250065	2.10042	up
ENSG00000115183	TANC1	90.9833	2.25184	0.495381	4.54567	5.47607e-06	4.37725e-05	2.09753	up
ENSG00000148498	PARD3	697.255	2.15938	0.314751	6.86057	6.85849e-12	1.7248e-10	2.09418	up
ENSG00000150471	ADGRL3	103.283	2.52467	0.806874	3.12895	0.00175433	0.00691293	2.09142	up
ENSG00000184058	TBX1	277.79	2.14834	0.302742	7.09628	1.28156e-12	3.58608e-11	2.09027	up
ENSG00000213949	ITGA1	27.4841	2.75046	1.01155	2.71906	0.00654677	0.0209754	2.09015	up
ENSG00000165462	PHOX2A	81.9149	2.20591	0.433922	5.08365	3.70258e-07	3.92606e-06	2.0896	up
ENSG00000171105	INSR	358.687	2.15801	0.32723	6.59479	4.25872e-11	9.43914e-10	2.08921	up
ENSG00000154027	AK5	68.3017	2.40205	0.694032	3.46101	0.000538163	0.00248858	2.08858	up
ENSG00000188613	NANOS1	38.2147	2.68827	1.06943	2.51373	0.0119463	0.0344562	2.08701	up
ENSG00000138674	SEC31A	932.507	2.10785	0.18583	11.3429	8.04288e-30	1.39499e-27	2.08486	up
ENSG00000172915	NBEA	99.9602	2.26826	0.529157	4.28654	1.81475e-05	0.000127441	2.08353	up
ENSG00000100697	DICER1	454.51	2.12157	0.23995	8.84172	9.42597e-19	5.5977e-17	2.08096	up
ENSG00000143624	INTS3	261.358	2.16736	0.368285	5.88502	3.97997e-09	6.22161e-08	2.07939	up
ENSG00000187017	ESPN	92.2952	2.27625	0.562093	4.04959	5.13066e-05	0.000319993	2.0776	up
ENSG00000234616	JRK	171.43	2.21908	0.46616	4.76035	1.93259e-06	1.73663e-05	2.07734	up
ENSG00000199523	RNA5SP226	11.0439	3.31731	1.40077	2.3682	0.0178748	0.048116	2.07728	up
ENSG00000198722	UNC13B	273.082	2.12794	0.28297	7.52003	5.47648e-14	1.87885e-12	2.07658	up
ENSG00000261221	ZNF865	48.9256	2.27021	0.55264	4.10793	3.99225e-05	0.00025691	2.07614	up
ENSG00000274756		9.86557	3.18373	1.29636	2.45589	0.0140537	0.0394616	2.0744	up
ENSG00000274964		33.788	2.57238	0.928985	2.76902	0.00562252	0.0185219	2.07401	up
ENSG00000270659		27.6989	2.3473	0.683646	3.4335	0.000595835	0.00272414	2.07304	up
ENSG00000201822	RNA5SP149	11.5589	2.83347	1.09291	2.59259	0.0095255	0.0286381	2.07002	up
ENSG00000154928	EPHB1	219.096	2.14684	0.355378	6.04098	1.53179e-09	2.583e-08	2.06675	up
ENSG00000070018	LRP6	444.726	2.12138	0.292725	7.247	4.26089e-13	1.27558e-11	2.06622	up
ENSG00000116133	DHCR24	1256.25	2.11635	0.28494	7.42737	1.10776e-13	3.64594e-12	2.06269	up
ENSG00000147202	DIAPH2	202.022	2.13583	0.341496	6.25433	3.99228e-10	7.45704e-09	2.06199	up
ENSG00000038427	VCAN	583.094	2.1469	0.360389	5.95719	2.56613e-09	4.17264e-08	2.06031	up
ENSG00000155980	KIF5A	57.4722	2.35486	0.68727	3.42639	0.000611653	0.00278422	2.05978	up
ENSG00000065883	CDK13	180.339	2.17636	0.42398	5.13317	2.84901e-07	3.09608e-06	2.05956	up
ENSG00000146576	INTS15	200.433	2.13686	0.354999	6.01934	1.75134e-09	2.93062e-08	2.05839	up
ENSG00000164053	ATRIP	173.06	2.21519	0.489334	4.52695	5.98406e-06	4.73139e-05	2.05798	up
ENSG00000143157	POGK	309.134	2.0986	0.253034	8.29373	1.09755e-16	5.31837e-15	2.05734	up
ENSG00000187720	THSD4	233.022	2.11356	0.307513	6.87305	6.28425e-12	1.59736e-10	2.05696	up
ENSG00000109670	FBXW7	400.232	2.10504	0.271397	7.75631	8.74328e-15	3.34048e-13	2.05619	up
ENSG00000196132	MYT1	24.9439	2.59598	0.937753	2.7683	0.00563498	0.0185462	2.05585	up
ENSG00000134644	PUM1	725.659	2.10047	0.269832	7.78436	7.00653e-15	2.7101e-13	2.05346	up
ENSG00000115464	USP34	265.558	2.14774	0.378255	5.67802	1.36265e-08	1.93247e-07	2.05274	up
ENSG00000082805	ERC1	257.474	2.13172	0.365371	5.8344	5.3986e-09	8.20452e-08	2.0459	up
ENSG00000197102	DYNC1H1	710.67	2.11068	0.321197	6.5713	4.98785e-11	1.09223e-09	2.04516	up
ENSG00000181222	POLR2A	247.785	2.11117	0.315726	6.68671	2.2824e-11	5.30634e-10	2.04509	up
ENSG00000148843	PDCD11	675.742	2.08052	0.24645	8.44195	3.12094e-17	1.60106e-15	2.04108	up
ENSG00000147251	DOCK11	101.606	2.17865	0.479116	4.54723	5.43566e-06	4.34972e-05	2.04105	up
ENSG00000131149	GSE1	872.685	2.0591	0.170657	12.0657	1.6021e-33	3.43259e-31	2.04058	up
ENSG00000011454	RABGAP1	163.819	2.11593	0.348034	6.07968	1.20425e-09	2.0739e-08	2.03815	up
ENSG00000183475	ASB7	81.3247	2.17121	0.460902	4.71078	2.46769e-06	2.16408e-05	2.0381	up
ENSG00000253729	PRKDC	2042.24	2.06187	0.192627	10.704	9.75127e-27	1.30739e-24	2.03791	up
ENSG00000176641	RNF152	68.1497	2.22019	0.56252	3.94687	7.91792e-05	0.000466159	2.03663	up
ENSG00000175602	CCDC85B	1310.65	2.07993	0.262374	7.92735	2.23875e-15	9.30146e-14	2.03611	up
ENSG00000105137	SYDE1	73.9326	2.22546	0.558359	3.98572	6.72751e-05	0.000404688	2.03564	up
ENSG00000076555	ACACB	52.7746	2.27798	0.628533	3.62427	0.000289774	0.00144715	2.03559	up
ENSG00000168067	MAP4K2	219.605	2.14339	0.413863	5.17898	2.23107e-07	2.48131e-06	2.03483	up
ENSG00000152192	POU4F1	193.116	2.10419	0.324189	6.49065	8.5468e-11	1.8064e-09	2.03467	up
ENSG00000187240	DYNC2H1	372.458	2.11381	0.347107	6.0898	1.13049e-09	1.95302e-08	2.03412	up
ENSG00000185339	TCN2	55.9012	2.27426	0.624432	3.64212	0.0002704	0.00136254	2.0339	up
ENSG00000166747	AP1G1	363.924	2.06771	0.232177	8.90575	5.30255e-19	3.21894e-17	2.03369	up
ENSG00000061918	GUCY1B1	142.161	2.21635	0.531662	4.16873	3.06304e-05	0.000203279	2.03306	up
ENSG00000072310	SREBF1	344.472	2.0793	0.273273	7.60886	2.76534e-14	9.93974e-13	2.03176	up
ENSG00000138182	KIF20B	1766.49	2.07021	0.246276	8.40608	4.23942e-17	2.14464e-15	2.03019	up
ENSG00000261236	BOP1	2437.99	2.0598	0.218338	9.43403	3.94626e-21	3.11341e-19	2.02921	up
ENSG00000165434	PGM2L1	208.619	2.10819	0.352792	5.97572	2.29078e-09	3.77546e-08	2.02878	up
ENSG00000071794	HLTF	964.465	2.13326	0.404592	5.27262	1.34489e-07	1.57088e-06	2.02849	up
ENSG00000176658	MYO1D	104.189	2.151	0.447429	4.80745	1.52864e-06	1.40817e-05	2.0267	up
ENSG00000159459	UBR1	176.231	2.123	0.390762	5.43297	5.54243e-08	6.99332e-07	2.02578	up
ENSG00000077235	GTF3C1	380.354	2.09138	0.32232	6.48852	8.66812e-11	1.82851e-09	2.02556	up
ENSG00000071575	TRIB2	184.029	2.14273	0.43708	4.90239	9.46795e-07	9.15948e-06	2.02354	up
ENSG00000095951	HIVEP1	67.5801	2.25007	0.603753	3.7268	0.000193925	0.00102195	2.02347	up
ENSG00000148737	TCF7L2	167.945	2.08835	0.328771	6.35198	2.12558e-10	4.16613e-09	2.02345	up
ENSG00000135631	RAB11FIP5	79.8612	2.2117	0.567341	3.89836	9.68458e-05	0.000556233	2.021	up
ENSG00000183048	SLC25A10	344.397	2.13034	0.417808	5.09885	3.41731e-07	3.65729e-06	2.02031	up
ENSG00000104824	HNRNPL	1867.96	2.05253	0.226284	9.07061	1.18347e-19	7.65195e-18	2.01998	up
ENSG00000258738	BAZ1A-AS1	29.8588	2.35648	0.76516	3.07972	0.00207194	0.00797048	2.01965	up
ENSG00000173905	GOLIM4	681.862	2.10083	0.354983	5.9181	3.25682e-09	5.18009e-08	2.01873	up
ENSG00000167470	MIDN	369.447	2.09609	0.356651	5.87714	4.17408e-09	6.50645e-08	2.01633	up
ENSG00000205562	FLRT2-AS1	16.3692	3.92342	1.57372	2.49309	0.0126637	0.0361627	2.01533	up
ENSG00000144218	AFF3	25.2738	2.47043	0.910368	2.71366	0.0066545	0.0212458	2.01356	up
ENSG00000148396	SEC16A	380.285	2.09159	0.353909	5.90996	3.42185e-09	5.42285e-08	2.01231	up
ENSG00000138767	CNOT6L	248.769	2.07263	0.311841	6.64644	3.00273e-11	6.80724e-10	2.01136	up
ENSG00000183091	NEB	48.4922	2.81647	1.11949	2.51586	0.0118743	0.0342756	2.00897	up
ENSG00000121879	PIK3CA	188.707	2.07567	0.336842	6.16215	7.17619e-10	1.28023e-08	2.00549	up
ENSG00000131409	LRRC4B	37.0552	2.28767	0.708786	3.22758	0.0012484	0.00516617	2.00302	up
ENSG00000183530	PRR14L	514.419	2.08748	0.364926	5.72029	1.06343e-08	1.53502e-07	2.00295	up
ENSG00000142627	EPHA2	198.423	2.07446	0.342812	6.05131	1.43671e-09	2.43395e-08	2.00248	up
ENSG00000099991	CABIN1	213.433	2.08437	0.363511	5.73399	9.80939e-09	1.42536e-07	2.00077	up
ENSG00000109111	SUPT6H	382.853	2.05277	0.289128	7.09988	1.24867e-12	3.503e-11	2.0007	up
ENSG00000023516	AKAP11	218.357	2.09774	0.391656	5.35606	8.50546e-08	1.03323e-06	2.00032	up
ENSG00000188573	FBLL1	53.99	2.37678	0.815391	2.91489	0.00355812	0.0125661	1.9994	up
ENSG00000101160	CTSZ	365.38	2.13857	0.474584	4.5062	6.6e-06	5.16606e-05	1.99877	up
ENSG00000067445	TRO	99.8329	2.14176	0.48294	4.43483	9.21455e-06	6.97281e-05	1.99823	up
ENSG00000181291	TMEM132E	172.386	2.06691	0.340789	6.06509	1.31882e-09	2.24991e-08	1.99651	up
ENSG00000103150	MLYCD	50.1807	3.19299	1.20139	2.65775	0.00786633	0.0244365	1.99571	up
ENSG00000075945	KIFAP3	195.761	2.09186	0.391795	5.33918	9.33704e-08	1.12611e-06	1.99493	up
ENSG00000079691	CARMIL1	232.421	2.12259	0.453029	4.68534	2.79493e-06	2.41711e-05	1.99409	up
ENSG00000071655	MBD3	746.286	2.04845	0.294363	6.9589	3.42928e-12	9.0621e-11	1.99394	up
ENSG00000137801	THBS1	10.9217	3.91569	1.62752	2.40592	0.0161316	0.0442723	1.99359	up
ENSG00000133422	MORC2	129.744	2.11482	0.448633	4.71392	2.42999e-06	2.13359e-05	1.99109	up
ENSG00000164327	RICTOR	113.989	2.21301	0.594366	3.72332	0.00019662	0.00103341	1.9903	up
ENSG00000168481	LGI3	54.1359	2.40271	0.830134	2.89437	0.00379924	0.0132824	1.98931	up
ENSG00000106278	PTPRZ1	34.1465	2.94081	1.16706	2.51985	0.0117406	0.0339757	1.98866	up
ENSG00000111783	RFX4	69.4615	2.16084	0.521031	4.14723	3.36526e-05	0.000220457	1.988	up
ENSG00000172575	RASGRP1	62.8089	2.19199	0.584154	3.75242	0.000175136	0.000935117	1.98795	up
ENSG00000073712	FERMT2	589.427	2.01066	0.192755	10.4311	1.78739e-25	2.13452e-23	1.98787	up
ENSG00000169783	LINGO1	407.456	2.05396	0.329808	6.22774	4.73219e-10	8.72719e-09	1.98737	up
ENSG00000144283	PKP4	589.175	2.0244	0.255577	7.92091	2.35779e-15	9.75892e-14	1.98374	up
ENSG00000101161	PRPF6	1837.19	2.05863	0.347473	5.92459	3.13082e-09	4.99058e-08	1.9835	up
ENSG00000101974	ATP11C	620.252	2.03405	0.285418	7.12657	1.02904e-12	2.93203e-11	1.98341	up
ENSG00000167414	GNG8	6.23446	5.18129	1.97665	2.62125	0.00876084	0.0266954	1.98279	up
ENSG00000198873	GRK5	32.0423	2.41508	0.884141	2.73155	0.00630364	0.0203263	1.98071	up
ENSG00000134318	ROCK2	577.947	2.02727	0.271175	7.47588	7.66898e-14	2.5824e-12	1.98055	up
ENSG00000065357	DGKA	144.779	2.11415	0.46873	4.51039	6.471e-06	5.076e-05	1.97894	up
ENSG00000173281	PPP1R3B	37.6816	2.50969	0.957349	2.62149	0.00875453	0.0266799	1.97851	up
ENSG00000139746	RBM26	534.04	2.07793	0.39644	5.24146	1.59307e-07	1.8314e-06	1.9768	up
ENSG00000183186	C2CD4C	116.917	2.19053	0.577021	3.79628	0.000146883	0.000802496	1.97654	up
ENSG00000087301	TXNDC16	167.039	2.05223	0.356299	5.75987	8.418e-09	1.23717e-07	1.9764	up
ENSG00000122547	EEPD1	85.9685	2.13799	0.520182	4.11008	3.95521e-05	0.000254902	1.97566	up
ENSG00000157212	PAXIP1	235.548	2.06657	0.385586	5.35955	8.34279e-08	1.01403e-06	1.97482	up
ENSG00000130304	SLC27A1	79.6533	2.29828	0.742966	3.09339	0.00197885	0.00765006	1.97378	up
ENSG00000155393	HEATR3	108.217	2.07995	0.421165	4.93855	7.87061e-07	7.75144e-06	1.97347	up
ENSG00000090905	TNRC6A	349.427	2.02956	0.299703	6.77189	1.27111e-11	3.05934e-10	1.97346	up
ENSG00000113615	SEC24A	169.457	2.08931	0.436158	4.79025	1.66577e-06	1.5219e-05	1.97324	up
ENSG00000153707	PTPRD	141.528	2.08982	0.442064	4.7274	2.2741e-06	2.01452e-05	1.97307	up
ENSG00000116962	NID1	324.93	2.02618	0.292453	6.92823	4.2614e-12	1.10342e-10	1.97259	up
ENSG00000105738	SIPA1L3	117.214	2.16969	0.579787	3.74222	0.000182399	0.000968924	1.97061	up
ENSG00000073050	XRCC1	540.885	2.0214	0.287607	7.02834	2.08998e-12	5.70931e-11	1.97041	up
ENSG00000121931	LRIF1	280.054	2.08504	0.432177	4.8245	1.40351e-06	1.30465e-05	1.96969	up
ENSG00000181638	ZFP41	37.1623	2.2123	0.631802	3.50157	0.000462522	0.00218032	1.96945	up
ENSG00000083812	ZNF324	121.139	2.18879	0.602172	3.63482	0.00027817	0.00139536	1.96859	up
ENSG00000092201	SUPT16H	1844.3	1.99493	0.217043	9.19141	3.87741e-20	2.67698e-18	1.96566	up
ENSG00000197016	ZNF470	69.6102	2.26613	0.67595	3.35251	0.000800831	0.00352282	1.96432	up
ENSG00000165733	BMS1	559.495	2.00069	0.243593	8.21322	2.15326e-16	1.02077e-14	1.96398	up
ENSG00000074590	NUAK1	186.312	2.1383	0.530105	4.03373	5.48974e-05	0.00033881	1.96355	up
ENSG00000170558	CDH2	808.715	2.02081	0.303203	6.66486	2.64912e-11	6.07491e-10	1.96342	up
ENSG00000076944	STXBP2	93.0832	2.08142	0.449735	4.62809	3.69045e-06	3.08417e-05	1.96302	up
ENSG00000145041	DCAF1	184.365	2.03942	0.359959	5.66568	1.4644e-08	2.06472e-07	1.96194	up
ENSG00000271992		22.6033	2.27953	0.721188	3.1608	0.00157336	0.00629171	1.96178	up
ENSG00000048707	VPS13D	119.919	2.09648	0.475176	4.41201	1.02415e-05	7.68606e-05	1.96176	up
ENSG00000110048	OSBP	298.23	2.00448	0.264892	7.56716	3.81487e-14	1.35122e-12	1.96132	up
ENSG00000166949	SMAD3	366.778	1.99474	0.236831	8.42266	3.68022e-17	1.87915e-15	1.96096	up
ENSG00000186868	MAPT	148.63	2.04946	0.38914	5.26664	1.38945e-07	1.61602e-06	1.96058	up
ENSG00000204469	PRRC2A	761.873	2.00259	0.265163	7.5523	4.27645e-14	1.49815e-12	1.95949	up
ENSG00000110514	MADD	183.907	2.01745	0.311075	6.48543	8.84814e-11	1.86109e-09	1.95933	up
ENSG00000270804		9.24619	5.43762	1.95298	2.78427	0.00536481	0.0178072	1.95789	up
ENSG00000139718	SETD1B	117.771	2.10282	0.484141	4.3434	1.40296e-05	0.000101591	1.95728	up
ENSG00000164880	INTS1	560.889	2.00682	0.291491	6.88466	5.79266e-12	1.48409e-10	1.9552	up
ENSG00000104517	UBR5	388.518	2.00909	0.294437	6.82351	8.88444e-12	2.19143e-10	1.95485	up
ENSG00000179981	TSHZ1	211.987	2.02183	0.32528	6.21567	5.11073e-10	9.36211e-09	1.95475	up
ENSG00000162688	AGL	313.585	2.00295	0.28101	7.1277	1.02063e-12	2.91185e-11	1.95471	up
ENSG00000277534		62.1046	2.25349	0.714816	3.15255	0.00161852	0.0064452	1.95271	up
ENSG00000164187	LMBRD2	140.402	2.03484	0.372413	5.46394	4.65672e-08	5.9618e-07	1.95203	up
ENSG00000164741	DLC1	132.885	2.14084	0.558568	3.83273	0.000126728	0.000704888	1.952	up
ENSG00000175115	PACS1	91.201	2.09654	0.493905	4.24482	2.18766e-05	0.000150107	1.95199	up
ENSG00000230778	ANKRD63	28.742	2.26796	0.743261	3.05136	0.00227806	0.00864018	1.94974	up
ENSG00000068137	PLEKHH3	220.956	2.02654	0.362526	5.59007	2.26978e-08	3.09058e-07	1.94839	up
ENSG00000117139	KDM5B	372.785	2.01908	0.338364	5.96719	2.41381e-09	3.94551e-08	1.94779	up
ENSG00000075702	WDR62	135.539	2.09516	0.48745	4.2982	1.72193e-05	0.000121547	1.94752	up
ENSG00000136111	TBC1D4	193.309	2.03038	0.370113	5.48582	4.11547e-08	5.31871e-07	1.94581	up
ENSG00000221988	PPT2	142.826	2.15974	0.603053	3.58135	0.000341826	0.0016742	1.94576	up
ENSG00000138669	PRKG2	43.6698	2.05809	0.460908	4.46528	7.99624e-06	6.13373e-05	1.94468	up
ENSG00000133216	EPHB2	255.445	2.04245	0.40305	5.06749	4.03101e-07	4.23935e-06	1.9446	up
ENSG00000134438	RAX	39.6822	2.13594	0.569499	3.75056	0.000176439	0.00094138	1.94457	up
ENSG00000162783	IER5	145.348	2.04821	0.416453	4.91823	8.73296e-07	8.5125e-06	1.94132	up
ENSG00000126012	KDM5C	304.175	2.03739	0.404247	5.03997	4.65607e-07	4.81561e-06	1.94078	up
ENSG00000148426	PROSER2	124.095	2.04507	0.422852	4.83637	1.32232e-06	1.23602e-05	1.94008	up
ENSG00000108506	INTS2	154.352	2.0341	0.398747	5.10124	3.3744e-07	3.62006e-06	1.93895	up
ENSG00000204371	EHMT2	482.435	1.99235	0.302377	6.58895	4.42942e-11	9.78772e-10	1.93746	up
ENSG00000204389	HSPA1A	196.425	2.01604	0.355336	5.67362	1.39809e-08	1.97504e-07	1.93571	up
ENSG00000066933	MYO9A	650.356	1.98759	0.29485	6.74102	1.57275e-11	3.74002e-10	1.93473	up
ENSG00000102996	MMP15	244.952	1.99691	0.327505	6.09735	1.07841e-09	1.866e-08	1.93435	up
ENSG00000028310	BRD9	427.345	1.9735	0.257168	7.67398	1.66738e-14	6.18657e-13	1.93396	up
ENSG00000172216	CEBPB	461.319	1.98837	0.304137	6.53775	6.24527e-11	1.34999e-09	1.93358	up
ENSG00000169554	ZEB2	116.895	2.02744	0.389297	5.20795	1.90941e-07	2.15205e-06	1.93247	up
ENSG00000060339	CCAR1	2634.48	1.95228	0.180587	10.8108	3.06056e-27	4.31519e-25	1.93197	up
ENSG00000116584	ARHGEF2	140.49	2.07201	0.490267	4.2263	2.37565e-05	0.000161586	1.92955	up
ENSG00000047644	WWC3	82.2513	2.15801	0.590297	3.6558	0.000256379	0.00129998	1.9295	up
ENSG00000152409	JMY	242.404	2.00455	0.357467	5.60767	2.05074e-08	2.8116e-07	1.92927	up
ENSG00000286259		32.4708	2.34515	0.817317	2.86933	0.00411347	0.0141948	1.92605	up
ENSG00000163125	RPRD2	629.65	1.96325	0.247194	7.94215	1.98703e-15	8.27135e-14	1.92531	up
ENSG00000186897	C1QL4	562.355	1.95246	0.218204	8.94788	3.62381e-19	2.21834e-17	1.92448	up
ENSG00000100105	PATZ1	245.199	1.96348	0.259656	7.56185	3.97373e-14	1.40521e-12	1.92378	up
ENSG00000198719	DLL1	127.765	2.07195	0.508752	4.07261	4.64902e-05	0.000294066	1.92364	up
ENSG00000133863	TEX15	385.536	1.99147	0.316286	6.29643	3.04574e-10	5.79879e-09	1.92275	up
ENSG00000159167	STC1	42.3456	2.22472	0.694862	3.20168	0.00136629	0.00557901	1.92258	up
ENSG00000112561	TFEB	109.449	2.32234	0.85524	2.71543	0.00661897	0.0211571	1.92248	up
ENSG00000149658	YTHDF1	419.4	1.97432	0.296061	6.66864	2.58181e-11	5.93926e-10	1.92164	up
ENSG00000164164	OTUD4	160.337	2.05082	0.465991	4.40099	1.07757e-05	8.04278e-05	1.9196	up
ENSG00000171451	DSEL	43.1511	2.68832	1.10352	2.43614	0.0148448	0.0412904	1.91953	up
ENSG00000150938	CRIM1	176.705	1.98863	0.34458	5.77118	7.87183e-09	1.16631e-07	1.91936	up
ENSG00000147010	SH3KBP1	1122.46	2.00465	0.376111	5.32994	9.82443e-08	1.17969e-06	1.91901	up
ENSG00000162367	TAL1	28.9011	2.17053	0.668005	3.24927	0.001157	0.00483649	1.919	up
ENSG00000153207	AHCTF1	304.704	1.95412	0.23267	8.39865	4.51637e-17	2.26898e-15	1.91871	up
ENSG00000140750	ARHGAP17	214.178	1.96675	0.286719	6.85949	6.91079e-12	1.73596e-10	1.91741	up
ENSG00000093000	NUP50	745.078	1.95292	0.249832	7.81693	5.41286e-15	2.13911e-13	1.91497	up
ENSG00000133103	COG6	318.975	1.96286	0.282862	6.93928	3.94105e-12	1.03147e-10	1.91417	up
ENSG00000163629	PTPN13	555.094	1.96969	0.304195	6.47508	9.47637e-11	1.97423e-09	1.91397	up
ENSG00000131725	WDR44	96.6553	2.06919	0.514299	4.02332	5.73841e-05	0.000352465	1.91356	up
ENSG00000162063	CCNF	973.071	1.94366	0.230991	8.41445	3.94732e-17	2.00616e-15	1.91156	up
ENSG00000198718	TOGARAM1	73.4647	2.06446	0.510284	4.04571	5.21655e-05	0.000324516	1.91135	up
ENSG00000170385	SLC30A1	141.191	2.12505	0.593842	3.57847	0.000345605	0.00169005	1.91118	up
ENSG00000164190	NIPBL	1023	1.98399	0.347091	5.71605	1.09028e-08	1.56859e-07	1.91111	up
ENSG00000253846	PCDHGA10	45.9638	2.28078	0.766543	2.97541	0.00292595	0.0106715	1.91065	up
ENSG00000289942		22.6785	2.1659	0.714675	3.03061	0.00244057	0.00916586	1.90958	up
ENSG00000144824	PHLDB2	51.8198	2.14448	0.646021	3.31952	0.000901737	0.00390306	1.90925	up
ENSG00000269947		21.8443	2.445	0.972848	2.51324	0.0119627	0.0344935	1.909	up
ENSG00000108262	GIT1	412.153	1.96048	0.297161	6.59737	4.18504e-11	9.28527e-10	1.90816	up
ENSG00000167632	TRAPPC9	134.154	2.03534	0.467762	4.35123	1.35375e-05	9.82235e-05	1.90788	up
ENSG00000101849	TBL1X	961.799	1.93493	0.212554	9.10324	8.76753e-20	5.78869e-18	1.9077	up
ENSG00000172379	ARNT2	159.319	2.03939	0.472528	4.31592	1.58939e-05	0.000113326	1.90763	up
ENSG00000170004	CHD3	685.333	1.93835	0.229549	8.44419	3.06152e-17	1.57427e-15	1.90646	up
ENSG00000153179	RASSF3	188.171	1.99313	0.389989	5.11072	3.20931e-07	3.45499e-06	1.90632	up
ENSG00000163605	PPP4R2	517.261	1.96203	0.307678	6.37689	1.80723e-10	3.56455e-09	1.90516	up
ENSG00000050344	NFE2L3	271.094	1.97042	0.335869	5.86663	4.44746e-09	6.89813e-08	1.90352	up
ENSG00000069696	DRD4	54.2847	2.12913	0.598732	3.55607	0.000376446	0.0018197	1.90226	up
ENSG00000065613	SLK	648.711	1.95994	0.30358	6.45611	1.0743e-10	2.22116e-09	1.90196	up
ENSG00000172175	MALT1	118.853	2.00327	0.413327	4.84668	1.25542e-06	1.18259e-05	1.90187	up
ENSG00000163155	LYSMD1	92.6353	2.1319	0.62292	3.42243	0.000620638	0.00281925	1.90086	up
ENSG00000114739	ACVR2B	437.739	1.93492	0.240774	8.03626	9.26205e-16	4.00817e-14	1.90023	up
ENSG00000125878	TCF15	128.652	1.95516	0.312483	6.25688	3.92767e-10	7.34263e-09	1.89887	up
ENSG00000175356	SCUBE2	51.9486	2.24659	0.787364	2.85331	0.0043267	0.0148299	1.89748	up
ENSG00000184445	KNTC1	329.363	1.93213	0.241582	7.99782	1.26638e-15	5.37389e-14	1.89739	up
ENSG00000225840		97.4956	2.48214	1.02095	2.4312	0.0150491	0.0417576	1.89684	up
ENSG00000170448	NFXL1	174.156	1.94445	0.284877	6.82558	8.75709e-12	2.16735e-10	1.89597	up
ENSG00000213750		14.3614	2.33367	0.949089	2.45885	0.0139383	0.0391779	1.89594	up
ENSG00000163888	CAMK2N2	36.6517	2.15791	0.66435	3.24815	0.00116159	0.00485428	1.89522	up
ENSG00000160321	ZNF208	275.962	1.9812	0.380072	5.21269	1.86125e-07	2.10537e-06	1.89339	up
ENSG00000169083	AR	213.685	1.95803	0.329884	5.93551	2.92938e-09	4.70035e-08	1.89247	up
ENSG00000177311	ZBTB38	103.902	1.99064	0.410332	4.85129	1.22663e-06	1.15796e-05	1.89233	up
ENSG00000103657	HERC1	378.794	1.94415	0.297734	6.52981	6.58542e-11	1.4143e-09	1.89191	up
ENSG00000186871	ERCC6L	175.263	1.99634	0.414649	4.81453	1.47549e-06	1.36344e-05	1.89184	up
ENSG00000117115	PADI2	60.3218	2.34428	0.928885	2.52376	0.0116108	0.033691	1.89175	up
ENSG00000005156	LIG3	227.959	1.98215	0.390538	5.07542	3.86634e-07	4.08583e-06	1.8916	up
ENSG00000188994	ZNF292	502.144	1.96724	0.354532	5.54883	2.87588e-08	3.844e-07	1.89154	up
ENSG00000234160		11.7354	2.32829	0.890672	2.61408	0.00894691	0.0271681	1.89116	up
ENSG00000145362	ANK2	109.048	1.9785	0.390287	5.06934	3.99191e-07	4.2043e-06	1.8909	up
ENSG00000255725	TDGP1	10.5094	2.51774	0.999154	2.51987	0.0117399	0.0339757	1.88956	up
ENSG00000111581	NUP107	877.794	1.93435	0.275928	7.01034	2.37741e-12	6.46217e-11	1.88906	up
ENSG00000175216	CKAP5	1154.04	1.94231	0.300955	6.4538	1.0908e-10	2.2489e-09	1.88836	up
ENSG00000146830	GIGYF1	227.493	1.93563	0.282573	6.85	7.38487e-12	1.84024e-10	1.88824	up
ENSG00000072840	EVC	51.6044	2.33392	0.875482	2.66587	0.00767888	0.0239632	1.88785	up
ENSG00000157933	SKI	78.5185	1.99804	0.443524	4.50492	6.63967e-06	5.19339e-05	1.88756	up
ENSG00000078674	PCM1	1229.29	1.90842	0.186671	10.2235	1.55689e-24	1.69275e-22	1.88746	up
ENSG00000102038	SMARCA1	288.131	1.91977	0.236182	8.12833	4.35241e-16	1.95715e-14	1.8871	up
ENSG00000118046	STK11	230.699	1.987	0.411911	4.82386	1.40804e-06	1.30713e-05	1.88699	up
ENSG00000162733	DDR2	31.6592	2.22121	0.765783	2.90057	0.00372482	0.0130557	1.88513	up
ENSG00000101751	POLI	159.824	2.04729	0.527957	3.87776	0.000105423	0.000599198	1.8851	up
ENSG00000101343	CRNKL1	389.877	1.95691	0.35084	5.57779	2.436e-08	3.29229e-07	1.88434	up
ENSG00000167323	STIM1	152.195	2.0185	0.483151	4.17779	2.94355e-05	0.000196063	1.8842	up
ENSG00000129534	MIS18BP1	887.122	1.92492	0.263363	7.309	2.69128e-13	8.36634e-12	1.88302	up
ENSG00000275632		9.73372	2.55227	1.01279	2.52003	0.0117344	0.0339706	1.88239	up
ENSG00000139880	CDH24	60.337	2.02	0.487845	4.14066	3.46305e-05	0.000225982	1.8815	up
ENSG00000115657	ABCB6	29.4622	2.03467	0.509555	3.99303	6.52337e-05	0.000394144	1.88131	up
ENSG00000122691	TWIST1	85.6127	2.05118	0.541889	3.78523	0.000153566	0.000834626	1.88098	up
ENSG00000162104	ADCY9	115.783	1.99489	0.441954	4.51379	6.3679e-06	5.0027e-05	1.88078	up
ENSG00000136824	SMC2	1074.93	1.93571	0.303346	6.38119	1.75722e-10	3.47846e-09	1.88027	up
ENSG00000248161		50.5949	2.03904	0.54327	3.75327	0.00017454	0.000932162	1.8798	up
ENSG00000171551	ECEL1	333.857	1.9334	0.306358	6.31092	2.77378e-10	5.32425e-09	1.87974	up
ENSG00000185985	SLITRK2	143.509	2.02384	0.494352	4.09393	4.24115e-05	0.000271171	1.8797	up
ENSG00000080503	SMARCA2	236.402	1.95117	0.353613	5.51782	3.43233e-08	4.48835e-07	1.87962	up
ENSG00000122299	ZC3H7A	394.806	1.90968	0.229296	8.32844	8.19148e-17	4.02285e-15	1.87935	up
ENSG00000090621	PABPC4	1214.96	1.92118	0.265476	7.23674	4.59589e-13	1.36651e-11	1.87888	up
ENSG00000134982	APC	262.442	1.95065	0.335285	5.81787	5.96009e-09	9.01138e-08	1.87876	up
ENSG00000164236	ANKRD33B	62.7285	2.06317	0.575669	3.58395	0.000338442	0.00165911	1.87548	up
ENSG00000112787	FBRSL1	219.247	1.91422	0.263146	7.27437	3.48042e-13	1.05494e-11	1.87529	up
ENSG00000081189	MEF2C	79.2445	2.14854	0.677466	3.17143	0.00151688	0.0060971	1.87506	up
ENSG00000125633	CCDC93	115.634	2.01195	0.484771	4.15032	3.32012e-05	0.000217826	1.87504	up
ENSG00000205189	ZBTB10	225.286	1.914	0.257911	7.42115	1.16105e-13	3.80985e-12	1.87492	up
ENSG00000123154	WDR83	151.504	2.01032	0.484824	4.14649	3.37608e-05	0.000220835	1.87481	up
ENSG00000075151	EIF4G3	394.637	1.92729	0.300192	6.42019	1.36107e-10	2.76439e-09	1.87428	up
ENSG00000092148	HECTD1	376.747	1.91399	0.262872	7.28107	3.31193e-13	1.00666e-11	1.87358	up
ENSG00000183114	FAM43B	24.0408	2.31832	0.95916	2.41703	0.0156479	0.0431506	1.87328	up
ENSG00000164330	EBF1	25.0111	2.07353	0.608527	3.40745	0.000655735	0.00295656	1.87322	up
ENSG00000074047	GLI2	154.109	1.93084	0.315533	6.11929	9.39907e-10	1.64194e-08	1.87271	up
ENSG00000175745	NR2F1	338.829	1.94515	0.356659	5.4538	4.93055e-08	6.27927e-07	1.86974	up
ENSG00000153157	SYCP2L	78.2328	2.12098	0.673606	3.1487	0.00164	0.00651884	1.86968	up
ENSG00000121068	TBX2	103.034	2.06691	0.594412	3.47724	0.000506606	0.00236013	1.86897	up
ENSG00000105963	ADAP1	62.5746	2.14989	0.708786	3.0332	0.00241973	0.00910012	1.86859	up
ENSG00000170265	ZNF282	218.506	1.9292	0.326664	5.90576	3.51016e-09	5.5347e-08	1.86826	up
ENSG00000238105	GOLGA2P5	23.8951	2.21893	0.752113	2.95026	0.00317506	0.0114294	1.86809	up
ENSG00000144668	ITGA9	104.761	2.07747	0.613762	3.38481	0.000712269	0.00317721	1.86708	up
ENSG00000154146	NRGN	119.304	1.96765	0.42618	4.61696	3.89409e-06	3.23459e-05	1.86563	up
ENSG00000198346	ZNF813	69.8036	2.05096	0.556437	3.68589	0.000227905	0.00117745	1.86468	up
ENSG00000111885	MAN1A1	106.472	1.97231	0.435387	4.53001	5.89799e-06	4.67179e-05	1.8633	up
ENSG00000100379	KCTD17	157.014	1.94854	0.389308	5.00513	5.5823e-07	5.69541e-06	1.8627	up
ENSG00000066248	NGEF	139.678	1.95713	0.413233	4.73615	2.1782e-06	1.93427e-05	1.86218	up
ENSG00000183837	PNMA3	91.3485	2.08696	0.632921	3.29735	0.000976018	0.00417415	1.86083	up
ENSG00000177663	IL17RA	243.544	1.97949	0.459196	4.31077	1.62688e-05	0.000115735	1.85932	up
ENSG00000135655	USP15	416.675	1.94707	0.385584	5.04966	4.42586e-07	4.60146e-06	1.85907	up
ENSG00000122591	FAM126A	607.023	1.89986	0.264274	7.18899	6.52727e-13	1.90196e-11	1.85881	up
ENSG00000172123	SLFN12	28.6181	2.49164	1.04341	2.38799	0.0169407	0.0460475	1.85861	up
ENSG00000141367	CLTC	1393.73	1.89152	0.237346	7.96948	1.59346e-15	6.68397e-14	1.85833	up
ENSG00000140743	CDR2	194.518	1.98134	0.463507	4.27468	1.91414e-05	0.000133477	1.85772	up
ENSG00000102796	DHRS12	31.0472	2.22411	0.843652	2.63629	0.00838179	0.0257703	1.85656	up
ENSG00000185920	PTCH1	161.214	2.06025	0.591049	3.48575	0.00049076	0.0022961	1.856	up
ENSG00000104067	TJP1	289.468	1.90643	0.296335	6.43336	1.24816e-10	2.54928e-09	1.85505	up
ENSG00000099219	ERMP1	144.154	1.90751	0.308976	6.17364	6.67344e-10	1.19837e-08	1.85468	up
ENSG00000153046	CDYL	518.273	1.94594	0.3961	4.91274	8.98111e-07	8.72326e-06	1.85416	up
ENSG00000137497	NUMA1	272.945	1.90334	0.29268	6.50313	7.86669e-11	1.67399e-09	1.85306	up
ENSG00000132716	DCAF8	163.02	1.93811	0.380872	5.08862	3.60685e-07	3.83759e-06	1.85283	up
ENSG00000160360	GPSM1	161.048	1.92832	0.364989	5.28322	1.26936e-07	1.48903e-06	1.85245	up
ENSG00000149503	INCENP	177.9	1.97978	0.4718	4.19623	2.71399e-05	0.000182049	1.85242	up
ENSG00000118193	KIF14	472.711	1.95276	0.406896	4.79915	1.59337e-06	1.46371e-05	1.85228	up
ENSG00000124782	RREB1	101.873	1.97839	0.460742	4.29392	1.75547e-05	0.000123715	1.85179	up
ENSG00000162337	LRP5	138.941	1.9291	0.373002	5.17182	2.31831e-07	2.56788e-06	1.85158	up
ENSG00000070961	ATP2B1	1394.64	1.8954	0.274978	6.8929	5.46655e-12	1.40383e-10	1.85099	up
ENSG00000184349	EFNA5	379.313	1.95129	0.411497	4.74192	2.11704e-06	1.88416e-05	1.85068	up
ENSG00000101265	RASSF2	131.512	2.11202	0.687699	3.07114	0.00213242	0.00815716	1.85048	up
ENSG00000178607	ERN1	76.424	2.08302	0.646539	3.2218	0.00127389	0.00525174	1.85033	up
ENSG00000089154	GCN1	500.19	1.87624	0.2129	8.81278	1.22083e-18	7.17207e-17	1.85028	up
ENSG00000147459	DOCK5	67.7534	2.00692	0.514548	3.90036	9.60482e-05	0.000552378	1.84991	up
ENSG00000166189	HPS6	126.648	1.96243	0.436317	4.49772	6.86869e-06	5.34574e-05	1.84971	up
ENSG00000121753	ADGRB2	181.964	1.94807	0.413636	4.70963	2.48161e-06	2.17526e-05	1.84865	up
ENSG00000188738	FSIP2	16.4597	2.30755	0.826561	2.79175	0.00524241	0.0174592	1.84798	up
ENSG00000171798	KNDC1	34.2935	2.23142	0.835192	2.67175	0.0075457	0.023615	1.84793	up
ENSG00000141858	SAMD1	501.422	1.87469	0.217525	8.61829	6.79622e-18	3.72242e-16	1.84778	up
ENSG00000204227	RING1	308.552	1.95932	0.440691	4.44602	8.74755e-06	6.64012e-05	1.84764	up
ENSG00000119707	RBM25	1303.71	1.87874	0.238982	7.86141	3.79831e-15	1.53719e-13	1.84543	up
ENSG00000107485	GATA3	251.356	1.93792	0.399364	4.85252	1.21901e-06	1.15279e-05	1.84393	up
ENSG00000182827	ACBD3	276.403	1.87959	0.253233	7.42236	1.15053e-13	3.78101e-12	1.84318	up
ENSG00000178184	PARD6G	119.271	1.92136	0.375082	5.12252	3.01484e-07	3.26493e-06	1.84189	up
ENSG00000188158	NHS	154.352	1.90977	0.349621	5.46239	4.69764e-08	6.01067e-07	1.84176	up
ENSG00000102924	CBLN1	48.9088	2.13521	0.728233	2.93205	0.00336734	0.0120265	1.84127	up
ENSG00000177731	FLII	443.951	1.89912	0.312918	6.06908	1.28646e-09	2.20332e-08	1.84044	up
ENSG00000179431	FJX1	140.688	1.92444	0.389502	4.94078	7.78123e-07	7.67314e-06	1.83985	up
ENSG00000066135	KDM4A	219.898	1.89842	0.324765	5.84552	5.04973e-09	7.72267e-08	1.83924	up
ENSG00000065970	FOXJ2	107.317	1.96943	0.493859	3.98784	6.66777e-05	0.000401204	1.83822	up
ENSG00000138771	SHROOM3	199.19	1.92048	0.384509	4.99464	5.89446e-07	5.98039e-06	1.83783	up
ENSG00000198162	MAN1A2	838.732	1.89382	0.307349	6.16179	7.19252e-10	1.2821e-08	1.83705	up
ENSG00000233757		104.384	1.98452	0.505763	3.92381	8.7158e-05	0.000507393	1.83687	up
ENSG00000118971	CCND2	775.281	1.8916	0.307431	6.1529	7.60768e-10	1.35169e-08	1.83552	up
ENSG00000115020	PIKFYVE	148.171	1.90976	0.355024	5.37924	7.47999e-08	9.21464e-07	1.83523	up
ENSG00000196235	SUPT5H	696.951	1.91492	0.375703	5.0969	3.45255e-07	3.69139e-06	1.83351	up
ENSG00000196628	TCF4	541.316	1.8781	0.274654	6.83808	8.02644e-12	1.99103e-10	1.83309	up
ENSG00000101421	CHMP4B	265.104	1.87013	0.262209	7.13219	9.87812e-13	2.82561e-11	1.83185	up
ENSG00000170322	NFRKB	276.192	1.91069	0.371177	5.14765	2.63768e-07	2.88219e-06	1.83164	up
ENSG00000259439	LINC01833	32.7084	2.37836	0.989221	2.40428	0.0162046	0.0444279	1.83102	up
ENSG00000005513	SOX8	54.4878	1.99939	0.556131	3.59519	0.00032416	0.00159897	1.82999	up
ENSG00000122778	KIAA1549	117.701	1.89274	0.336668	5.62197	1.88797e-08	2.60149e-07	1.82918	up
ENSG00000081692	JMJD4	112.416	1.96371	0.482809	4.06727	4.75677e-05	0.000300293	1.82904	up
ENSG00000139083	ETV6	111.51	1.90506	0.365699	5.20937	1.89483e-07	2.13979e-06	1.82821	up
ENSG00000148468	FAM171A1	386.293	1.86565	0.257432	7.24714	4.25657e-13	1.27558e-11	1.82818	up
ENSG00000071054	MAP4K4	833.914	1.88597	0.316941	5.95053	2.6728e-09	4.32998e-08	1.82813	up
ENSG00000116819	TFAP2E	47.7092	2.09377	0.7175	2.91815	0.0035212	0.0124579	1.82683	up
ENSG00000119285	HEATR1	242.536	1.9229	0.401157	4.79337	1.64e-06	1.50149e-05	1.82613	up
ENSG00000147065	MSN	376.926	1.88583	0.330557	5.705	1.16343e-08	1.67054e-07	1.82513	up
ENSG00000184178	SCFD2	346.06	1.89043	0.338762	5.5804	2.39964e-08	3.25119e-07	1.82501	up
ENSG00000131979	GCH1	124.953	1.99277	0.543244	3.66828	0.00024419	0.00124948	1.82439	up
ENSG00000204060	FOXO6	16.8934	2.17389	0.804993	2.7005	0.00692349	0.0219634	1.82431	up
ENSG00000147548	NSD3	764.963	1.87093	0.285675	6.54915	5.78656e-11	1.2583e-09	1.82357	up
ENSG00000269958		75.0572	1.9766	0.514941	3.8385	0.000123789	0.000690475	1.82346	up
ENSG00000180357	ZNF609	380.181	1.85676	0.242283	7.66358	1.80819e-14	6.68633e-13	1.82333	up
ENSG00000176842	IRX5	68.8521	1.99843	0.560193	3.5674	0.000360538	0.00175249	1.8231	up
ENSG00000204946	ZNF783	63.5763	1.9616	0.496636	3.94977	7.82256e-05	0.000460973	1.82294	up
ENSG00000114127	XRN1	179.755	1.87886	0.316168	5.94261	2.80517e-09	4.52429e-08	1.82233	up
ENSG00000197603	CPLANE1	54.2806	2.12044	0.711776	2.97909	0.00289104	0.0105636	1.82162	up
ENSG00000198589	LRBA	255.336	1.87871	0.315608	5.95266	2.63813e-09	4.28334e-08	1.82096	up
ENSG00000110422	HIPK3	110.176	1.91242	0.405668	4.71423	2.42621e-06	2.13112e-05	1.82018	up
ENSG00000118513	MYB	84.4952	1.97325	0.51982	3.79602	0.000147038	0.000803143	1.8194	up
ENSG00000065923	SLC9A7	124.274	1.99118	0.552807	3.60195	0.000315841	0.00156269	1.81864	up
ENSG00000102230	PCYT1B	41.8793	2.13513	0.70437	3.03126	0.00243532	0.00914772	1.81832	up
ENSG00000223802	CERS1	96.1891	1.88838	0.358823	5.2627	1.41959e-07	1.65019e-06	1.81826	up
ENSG00000143195	ILDR2	131.254	1.91151	0.407548	4.69026	2.72858e-06	2.37099e-05	1.81809	up
ENSG00000116991	SIPA1L2	214.855	1.85618	0.259481	7.15345	8.46216e-13	2.44619e-11	1.81776	up
ENSG00000124535	WRNIP1	264.219	1.86221	0.279462	6.66356	2.67277e-11	6.12272e-10	1.81771	up
ENSG00000171246	NPTX1	607.574	1.8861	0.34888	5.40615	6.43942e-08	8.02321e-07	1.81713	up
ENSG00000128564	VGF	26.4979	2.62379	1.11297	2.35746	0.0184003	0.0492614	1.81707	up
ENSG00000142149	HUNK	103.154	1.87768	0.339487	5.53092	3.18563e-08	4.20403e-07	1.81664	up
ENSG00000169855	ROBO1	464.815	1.83599	0.191896	9.56761	1.094e-21	9.19551e-20	1.81593	up
ENSG00000085719	CPNE3	686.955	1.86512	0.292295	6.38096	1.75977e-10	3.48036e-09	1.81588	up
ENSG00000198862	LTN1	144.673	1.91166	0.409613	4.66699	3.05649e-06	2.6123e-05	1.81567	up
ENSG00000138778	CENPE	2005.55	1.86693	0.298244	6.25972	3.85665e-10	7.21602e-09	1.81497	up
ENSG00000120549	KIAA1217	110.578	2.0109	0.613048	3.28017	0.00103745	0.00440414	1.8137	up
ENSG00000100207	TCF20	266.279	1.99225	0.559498	3.56077	0.000369764	0.00179096	1.81333	up
ENSG00000104884	ERCC2	277.814	1.89315	0.376981	5.02187	5.1171e-07	5.24773e-06	1.81303	up
ENSG00000101868	POLA1	510.381	1.89009	0.36559	5.16997	2.34132e-07	2.59074e-06	1.81302	up
ENSG00000156017	CARNMT1	254.861	1.90246	0.392546	4.84646	1.25687e-06	1.18344e-05	1.81276	up
ENSG00000177350	RPL13AP3	38.2164	2.07677	0.703537	2.9519	0.00315828	0.0113765	1.8124	up
ENSG00000123384	LRP1	196.958	1.89493	0.389193	4.86886	1.12242e-06	1.07068e-05	1.81169	up
ENSG00000178691	SUZ12	716.685	1.83216	0.190481	9.61859	6.67376e-22	5.76476e-20	1.81114	up
ENSG00000168913	ENHO	100.467	1.93827	0.476858	4.06467	4.81006e-05	0.000303199	1.81109	up
ENSG00000074410	CA12	170.941	1.86608	0.309769	6.02411	1.70044e-09	2.8498e-08	1.81042	up
ENSG00000059769	DNAJC25	88.5063	2.10557	0.71107	2.96113	0.00306513	0.0110995	1.81038	up
ENSG00000214888		39.7255	2.01418	0.622157	3.23742	0.00120615	0.00501888	1.80986	up
ENSG00000168280	KIF5C	602.038	1.8495	0.270257	6.8435	7.72787e-12	1.91915e-10	1.80758	up
ENSG00000112282	MED23	64.1235	2.02194	0.620593	3.25807	0.00112171	0.00470427	1.80671	up
ENSG00000167393	PPP2R3B	390.478	1.84063	0.247248	7.4445	9.73109e-14	3.22785e-12	1.80639	up
ENSG00000204267	TAP2	66.5698	1.97264	0.556648	3.54379	0.00039442	0.00189777	1.80632	up
ENSG00000133026	MYH10	679.153	1.85169	0.2805	6.60137	4.07379e-11	9.04762e-10	1.80592	up
ENSG00000187605	TET3	89.4599	1.93208	0.468311	4.12563	3.6972e-05	0.000239474	1.80583	up
ENSG00000164105	SAP30	226.848	1.84418	0.270631	6.81436	9.46819e-12	2.31933e-10	1.80441	up
ENSG00000111962	UST	103.164	1.90708	0.433068	4.40365	1.06444e-05	7.95293e-05	1.80398	up
ENSG00000132466	ANKRD17	550.704	1.82913	0.214285	8.53599	1.38957e-17	7.33518e-16	1.80311	up
ENSG00000062038	CDH3	55.3757	2.0927	0.714548	2.9287	0.00340385	0.0121192	1.80193	up
ENSG00000122257	RBBP6	1071.14	1.83227	0.232189	7.89126	2.99142e-15	1.22884e-13	1.80036	up
ENSG00000113658	SMAD5	462.052	1.84081	0.268654	6.85196	7.28471e-12	1.81943e-10	1.79943	up
ENSG00000196335	STK31	34.2938	2.1203	0.80646	2.62914	0.00856003	0.0261784	1.79864	up
ENSG00000185352	HS6ST3	91.5714	2.01393	0.618865	3.25424	0.00113697	0.00476185	1.79815	up
ENSG00000176463	SLCO3A1	76.8295	1.86579	0.361418	5.16241	2.43788e-07	2.68806e-06	1.79753	up
ENSG00000160957	RECQL4	372.036	1.83907	0.275766	6.66896	2.57629e-11	5.93281e-10	1.79681	up
ENSG00000272711	HK2-DT	68.3156	1.98702	0.565308	3.51494	0.000439847	0.00208829	1.79595	up
ENSG00000168993	CPLX1	31.0648	2.04649	0.658377	3.10839	0.00188109	0.00732785	1.79573	up
ENSG00000136861	CDK5RAP2	647.733	1.83441	0.26367	6.95724	3.47009e-12	9.15887e-11	1.79534	up
ENSG00000162231	NXF1	237.737	1.84604	0.301054	6.13193	8.68176e-10	1.52272e-08	1.79501	up
ENSG00000105426	PTPRS	697.625	1.83193	0.257687	7.10914	1.16768e-12	3.30123e-11	1.79412	up
ENSG00000214575	CPEB1	31.1291	2.21269	0.866876	2.55249	0.0106957	0.0314806	1.79264	up
ENSG00000144028	SNRNP200	1238.34	1.82106	0.224805	8.10064	5.46709e-16	2.43336e-14	1.7923	up
ENSG00000169718	DUS1L	648.198	1.81885	0.218646	8.3187	8.89334e-17	4.34799e-15	1.79178	up
ENSG00000110400	NECTIN1	144.218	1.91115	0.464617	4.1134	3.89879e-05	0.00025186	1.79155	up
ENSG00000187079	TEAD1	476.814	1.88973	0.413004	4.57558	4.74898e-06	3.85242e-05	1.79141	up
ENSG00000109956	B3GAT1	53.5659	2.08259	0.724874	2.87304	0.00406547	0.0140603	1.79131	up
ENSG00000136731	UGGT1	542.684	1.81285	0.19901	9.10934	8.28834e-20	5.48889e-18	1.79039	up
ENSG00000174106	LEMD3	148.159	1.90833	0.458035	4.16635	3.09512e-05	0.000204972	1.79016	up
ENSG00000125285	SOX21	123.081	1.84045	0.304062	6.05289	1.4227e-09	2.41582e-08	1.78957	up
ENSG00000255362	LINC02761	12.4388	2.36522	1.00389	2.35606	0.01847	0.0494055	1.78904	up
ENSG00000280088		67.3263	2.00669	0.624509	3.21323	0.00131252	0.00538879	1.78899	up
ENSG00000135424	ITGA7	83.4314	1.89578	0.449972	4.2131	2.5189e-05	0.000170006	1.78832	up
ENSG00000236493	EIF2S2P3	28.1796	1.93914	0.551627	3.51532	0.000439232	0.00208582	1.78831	up
ENSG00000164414	SLC35A1	124.664	1.91559	0.47452	4.03691	5.41598e-05	0.000335205	1.78822	up
ENSG00000163939	PBRM1	449.414	1.81776	0.230861	7.8738	3.4403e-15	1.40269e-13	1.78779	up
ENSG00000141258	SGSM2	101.059	1.87485	0.396801	4.72491	2.30222e-06	2.03778e-05	1.78638	up
ENSG00000144959	NCEH1	54.7357	2.08799	0.772844	2.70169	0.00689875	0.021904	1.78637	up
ENSG00000279495		111.039	1.9131	0.476276	4.01679	5.89961e-05	0.000360812	1.78636	up
ENSG00000090238	YPEL3	194.349	1.90679	0.468892	4.06659	4.77056e-05	0.000301056	1.78562	up
ENSG00000203877	RIPPLY2	14.013	2.11253	0.790418	2.67268	0.00752484	0.0235565	1.7854	up
ENSG00000157741	UBN2	140.17	2.00927	0.631612	3.18118	0.00146676	0.00592725	1.78469	up
ENSG00000188176	SMTNL2	62.9151	1.89947	0.474863	4.00004	6.33327e-05	0.000384038	1.78319	up
ENSG00000198026	ZNF335	165.436	1.90792	0.479349	3.98023	6.88494e-05	0.000412794	1.78283	up
ENSG00000044446	PHKA2	108.156	1.9222	0.50983	3.77027	0.000163073	0.000879722	1.78171	up
ENSG00000198682	PAPSS2	165.031	1.93104	0.508725	3.79583	0.000147148	0.00080354	1.78092	up
ENSG00000134852	CLOCK	159.389	1.85341	0.35904	5.16213	2.44155e-07	2.69076e-06	1.77865	up
ENSG00000123124	WWP1	261.73	1.82405	0.285811	6.38202	1.74767e-10	3.46584e-09	1.77746	up
ENSG00000140332	TLE3	807.769	1.81056	0.245287	7.38139	1.5665e-13	5.04187e-12	1.77718	up
ENSG00000083642	PDS5B	467.815	1.82494	0.295737	6.17081	6.79415e-10	1.21804e-08	1.77585	up
ENSG00000107140	TESK1	63.1659	1.96981	0.596759	3.30084	0.00096395	0.00413062	1.77581	up
ENSG00000054523	KIF1B	851.175	1.83009	0.313347	5.84047	5.20535e-09	7.92737e-08	1.7754	up
ENSG00000141456	PELP1	898.317	1.807	0.237186	7.61849	2.56655e-14	9.31717e-13	1.77516	up
ENSG00000134686	PHC2	324.575	1.86369	0.404943	4.60235	4.17741e-06	3.44372e-05	1.77486	up
ENSG00000232838	PET117	48.5208	1.93698	0.550694	3.51734	0.000435892	0.00207267	1.77462	up
ENSG00000099949	LZTR1	143.109	1.86174	0.392839	4.7392	2.14564e-06	1.90768e-05	1.7744	up
ENSG00000145911	N4BP3	183.599	1.93997	0.556777	3.48429	0.000493447	0.00230669	1.77395	up
ENSG00000101040	ZMYND8	533.166	1.8128	0.264303	6.85879	6.9447e-12	1.74247e-10	1.77374	up
ENSG00000179862	CITED4	55.5424	1.93396	0.557082	3.4716	0.000517374	0.00240414	1.77367	up
ENSG00000136040	PLXNC1	50.4335	1.9118	0.516409	3.7021	0.000213823	0.00111418	1.77366	up
ENSG00000166704	ZNF606	84.7658	1.94542	0.558506	3.48326	0.000495341	0.00231505	1.77341	up
ENSG00000136205	TNS3	237.726	1.86105	0.39836	4.67177	2.98609e-06	2.55714e-05	1.77304	up
ENSG00000010322	NISCH	290.447	1.81358	0.273554	6.62968	3.36425e-11	7.55624e-10	1.77277	up
ENSG00000184986	TMEM121	131.495	1.92639	0.543895	3.54184	0.00039735	0.00190976	1.77264	up
ENSG00000127580	WDR24	135.073	1.85768	0.390365	4.75883	1.94721e-06	1.74475e-05	1.77209	up
ENSG00000105298	CACTIN	95.146	1.99604	0.645839	3.09061	0.00199746	0.00771791	1.77186	up
ENSG00000126214	KLC1	426.664	1.83715	0.346345	5.30437	1.13061e-07	1.33921e-06	1.77177	up
ENSG00000162227	TAF6L	72.9128	1.92791	0.544156	3.54295	0.000395684	0.00190259	1.77146	up
ENSG00000234965	SHISA8	49.6479	2.06962	0.75352	2.74661	0.00602154	0.0195913	1.76673	up
ENSG00000033627	ATP6V0A1	157.693	1.87696	0.448935	4.18092	2.90338e-05	0.000193624	1.76606	up
ENSG00000118762	PKD2	53.5383	2.22157	0.902975	2.46028	0.013883	0.0390716	1.76551	up
ENSG00000225581	TRIM53AP	41.5654	2.56462	0.949461	2.70113	0.00691043	0.0219264	1.7651	up
ENSG00000140534	TICRR	169.441	1.81822	0.310911	5.84804	4.97391e-09	7.61204e-08	1.76469	up
ENSG00000272599		70.4051	1.91557	0.499522	3.83481	0.000125663	0.000699502	1.76374	up
ENSG00000126705	AHDC1	43.5924	1.88674	0.480379	3.92761	8.57929e-05	0.000500245	1.76371	up
ENSG00000122779	TRIM24	995.723	1.78442	0.195149	9.14389	6.02431e-20	4.06343e-18	1.76288	up
ENSG00000128335	APOL2	42.966	2.07092	0.749995	2.76125	0.00575803	0.0188773	1.76222	up
ENSG00000160305	DIP2A	218.856	1.83423	0.364382	5.03381	4.80825e-07	4.95191e-06	1.76203	up
ENSG00000168264	IRF2BP2	320.837	1.80141	0.269217	6.69128	2.2123e-11	5.14883e-10	1.76201	up
ENSG00000143869	GDF7	46.0369	2.04595	0.71874	2.84658	0.0044191	0.0151111	1.75883	up
ENSG00000100629	CEP128	108.271	1.8266	0.356345	5.12594	2.9606e-07	3.20778e-06	1.75871	up
ENSG00000135837	CEP350	520.235	1.83802	0.372309	4.93681	7.94114e-07	7.80682e-06	1.75782	up
ENSG00000142156	COL6A1	388.374	1.82334	0.346701	5.25913	1.44742e-07	1.67827e-06	1.75761	up
ENSG00000150764	DIXDC1	158.984	2.07594	0.773035	2.68544	0.00724337	0.022783	1.75682	up
ENSG00000215612	HMX1	94.261	1.83474	0.369785	4.96166	6.98944e-07	6.97476e-06	1.75658	up
ENSG00000104228	TRIM35	80.7462	1.82636	0.369985	4.93629	7.96216e-07	7.82397e-06	1.75488	up
ENSG00000005339	CREBBP	388.844	1.80042	0.288938	6.23116	4.62981e-10	8.5456e-09	1.75474	up
ENSG00000152217	SETBP1	115.845	1.89802	0.505418	3.75534	0.000173104	0.000926302	1.75418	up
ENSG00000072133	RPS6KA6	93.3612	1.9753	0.637889	3.09662	0.00195738	0.00757511	1.75222	up
ENSG00000188322	SBK1	394.225	1.79922	0.287849	6.25058	4.0893e-10	7.61222e-09	1.75217	up
ENSG00000137845	ADAM10	767.803	1.81427	0.337046	5.38286	7.33119e-08	9.03643e-07	1.75191	up
ENSG00000113649	TCERG1	1065.45	1.77754	0.217831	8.16017	3.3456e-16	1.52026e-14	1.75094	up
ENSG00000133424	LARGE1	98.8805	1.89623	0.525227	3.61031	0.000305833	0.00151936	1.75052	up
ENSG00000088836	SLC4A11	114.202	1.89829	0.521572	3.63956	0.000273108	0.00137302	1.75036	up
ENSG00000156535	CD109	146.814	1.88818	0.509101	3.70886	0.000208192	0.00108952	1.74948	up
ENSG00000139197	PEX5	266.683	1.80282	0.314476	5.73279	9.8793e-09	1.43457e-07	1.74944	up
ENSG00000176428	VPS37D	51.6446	2.09534	0.856068	2.44764	0.0143797	0.0402167	1.7484	up
ENSG00000133226	SRRM1	1799.2	1.77216	0.20881	8.48697	2.12092e-17	1.10097e-15	1.74764	up
ENSG00000178445	GLDC	254.889	1.81336	0.36675	4.94441	7.63743e-07	7.55926e-06	1.74745	up
ENSG00000136379	ABHD17C	405.744	1.78491	0.263317	6.77857	1.2137e-11	2.93086e-10	1.7472	up
ENSG00000165030	NFIL3	100.281	1.81101	0.354588	5.10737	3.26666e-07	3.51499e-06	1.74676	up
ENSG00000179083	FAM133A	50.7001	2.04367	0.754271	2.70946	0.00673924	0.0214608	1.74655	up
ENSG00000138078	PREPL	299.458	1.81354	0.349304	5.19188	2.08179e-07	2.33071e-06	1.74651	up
ENSG00000164944	VIRMA	451.768	1.80111	0.315759	5.70408	1.16976e-08	1.67853e-07	1.7458	up
ENSG00000117523	PRRC2C	2327.46	1.80939	0.337436	5.36218	8.22256e-08	1.00057e-06	1.7456	up
ENSG00000169217	CD2BP2	591.618	1.77932	0.254831	6.98236	2.90268e-12	7.74799e-11	1.74375	up
ENSG00000171100	MTM1	79.1467	1.88253	0.504714	3.72989	0.000191564	0.00101122	1.74311	up
ENSG00000198729	PPP1R14C	63.2857	2.12823	0.862171	2.46845	0.0135699	0.0383397	1.74274	up
ENSG00000085511	MAP3K4	141.024	1.82943	0.394206	4.6408	3.47063e-06	2.9172e-05	1.74272	up
ENSG00000151150	ANK3	144.043	1.87652	0.493014	3.80622	0.000141107	0.000775008	1.74261	up
ENSG00000142599	RERE	318.147	1.80378	0.335944	5.36928	7.90512e-08	9.67292e-07	1.74252	up
ENSG00000159885	ZNF222	36.7364	1.9802	0.679854	2.91269	0.00358335	0.0126368	1.74238	up
ENSG00000060749	QSER1	392.635	1.87135	0.478329	3.91226	9.14347e-05	0.000529469	1.74188	up
ENSG00000119042	SATB2	141.49	1.84603	0.433019	4.26315	2.01565e-05	0.000139841	1.74074	up
ENSG00000171813	PWWP2B	100.658	1.88816	0.548548	3.44211	0.000577193	0.00264944	1.74008	up
ENSG00000160551	TAOK1	479.437	1.77019	0.236347	7.48981	6.8976e-14	2.34433e-12	1.73881	up
ENSG00000110721	CHKA	114.403	1.8444	0.446947	4.12667	3.68057e-05	0.000238539	1.73874	up
ENSG00000100285	NEFH	442.981	1.79427	0.325872	5.50606	3.66963e-08	4.77642e-07	1.73633	up
ENSG00000170832	USP32	155.192	1.81194	0.372538	4.86377	1.15172e-06	1.0972e-05	1.73631	up
ENSG00000100644	HIF1A	679.879	1.76435	0.230746	7.64627	2.0689e-14	7.59896e-13	1.7355	up
ENSG00000120071	KANSL1	221.419	1.79891	0.345563	5.20572	1.93243e-07	2.17463e-06	1.73549	up
ENSG00000164465	DCBLD1	129.778	1.82076	0.405194	4.49355	7.0044e-06	5.43587e-05	1.73381	up
ENSG00000196712	NF1	338.195	1.7899	0.321578	5.56599	2.60672e-08	3.50567e-07	1.73366	up
ENSG00000075213	SEMA3A	57.0822	2.0149	0.697879	2.88718	0.0038871	0.013529	1.73346	up
ENSG00000090857	PDPR	554.951	1.84049	0.445929	4.12731	3.67025e-05	0.000238082	1.73319	up
ENSG00000058272	PPP1R12A	765.97	1.78192	0.297579	5.98806	2.12364e-09	3.50529e-08	1.7331	up
ENSG00000163482	STK36	53.0539	1.91383	0.587038	3.26015	0.00111354	0.00467717	1.73249	up
ENSG00000115266	APC2	48.1281	1.82017	0.415019	4.38575	1.15588e-05	8.56e-05	1.73246	up
ENSG00000179855	GIPC3	21.2045	2.21562	0.902978	2.45369	0.0141401	0.0396481	1.73114	up
ENSG00000155506	LARP1	1937.06	1.76982	0.265222	6.67298	2.50662e-11	5.77844e-10	1.73097	up
ENSG00000168502	MTCL1	96.6995	1.83676	0.449373	4.08738	4.36272e-05	0.000277805	1.73024	up
ENSG00000123407	HOXC12	173.417	1.81792	0.403786	4.50218	6.72607e-06	5.25712e-05	1.7301	up
ENSG00000174485	DENND4A	320.065	1.76498	0.25461	6.9321	4.14639e-12	1.08004e-10	1.72959	up
ENSG00000085224	ATRX	748.177	1.77538	0.291571	6.08901	1.13611e-09	1.96118e-08	1.7287	up
ENSG00000139531	SUOX	84.1679	2.05547	0.776709	2.64639	0.00813567	0.025141	1.72827	up
ENSG00000154380	ENAH	2261.65	1.75313	0.213019	8.22992	1.87331e-16	8.93873e-15	1.72809	up
ENSG00000206538	VGLL3	44.0955	1.95945	0.655867	2.98758	0.002812	0.0103248	1.72746	up
ENSG00000172292	CERS6	99.9698	1.83797	0.451896	4.06725	4.75709e-05	0.000300293	1.72727	up
ENSG00000066279	ASPM	928.532	1.77982	0.306313	5.81044	6.23096e-09	9.37174e-08	1.726	up
ENSG00000173548	SNX33	115.705	1.80544	0.393593	4.58706	4.4954e-06	3.66713e-05	1.726	up
ENSG00000108784	NAGLU	148.286	1.78997	0.358855	4.98799	6.10099e-07	6.16224e-06	1.7238	up
ENSG00000228903	RASA4CP	44.6202	2.02173	0.779181	2.59468	0.00946787	0.0284962	1.72365	up
ENSG00000009413	REV3L	379.84	1.82671	0.424987	4.29827	1.72136e-05	0.000121546	1.72324	up
ENSG00000126001	CEP250	328.284	1.77461	0.309667	5.73073	1e-08	1.45113e-07	1.72271	up
ENSG00000100503	NIN	446.948	1.77208	0.297977	5.94704	2.73041e-09	4.41676e-08	1.72181	up
ENSG00000068383	INPP5A	67.8464	2.12601	0.89761	2.36853	0.0178591	0.0481011	1.72072	up
ENSG00000108312	UBTF	684.413	1.76293	0.281038	6.27293	3.54326e-10	6.66963e-09	1.72038	up
ENSG00000289507		86.8744	1.93627	0.643916	3.00702	0.00263825	0.00978719	1.72038	up
ENSG00000150510	FAM124A	239.75	1.79408	0.376022	4.77121	1.83122e-06	1.65507e-05	1.72008	up
ENSG00000163848	ZNF148	360.267	1.77457	0.316852	5.60063	2.13577e-08	2.91903e-07	1.72	up
ENSG00000113569	NUP155	887.436	1.75505	0.254973	6.88328	5.84912e-12	1.4933e-10	1.71982	up
ENSG00000104321	TRPA1	126.589	1.81271	0.410458	4.41631	1.00402e-05	7.54793e-05	1.71981	up
ENSG00000120802	TMPO	2205.11	1.76379	0.285819	6.17099	6.78648e-10	1.21767e-08	1.71958	up
ENSG00000215251	FASTKD5	341.792	1.78403	0.34656	5.14782	2.63529e-07	2.88103e-06	1.71934	up
ENSG00000163932	PRKCD	116.692	1.82451	0.447457	4.0775	4.55216e-05	0.000288691	1.71885	up
ENSG00000170471	RALGAPB	139.64	1.79459	0.371435	4.83151	1.35502e-06	1.26388e-05	1.7183	up
ENSG00000198793	MTOR	289.056	1.83261	0.460989	3.97539	7.02654e-05	0.000420592	1.71795	up
ENSG00000143543	JTB	361.083	1.77616	0.329149	5.39623	6.80566e-08	8.43624e-07	1.71791	up
ENSG00000124224	PPP4R1L	63.7313	1.93352	0.652955	2.96119	0.00306454	0.0110992	1.71775	up
ENSG00000004777	ARHGAP33	42.8708	2.03632	0.796493	2.5566	0.0105699	0.0311693	1.71735	up
ENSG00000163083	INHBB	197.748	1.75852	0.282028	6.23528	4.50985e-10	8.34532e-09	1.71731	up
ENSG00000101745	ANKRD12	627.82	1.76218	0.286814	6.14397	8.04838e-10	1.42536e-08	1.71722	up
ENSG00000124177	CHD6	357.501	1.79127	0.372651	4.80683	1.53342e-06	1.4116e-05	1.71705	up
ENSG00000196914	ARHGEF12	358.26	1.75375	0.260785	6.72487	1.75748e-11	4.16573e-10	1.71694	up
ENSG00000143799	PARP1	5849.28	1.7505	0.250691	6.9827	2.89551e-12	7.74522e-11	1.71631	up
ENSG00000109458	GAB1	69.9073	1.93456	0.648952	2.98105	0.00287265	0.0105112	1.71526	up
ENSG00000139324	TMTC3	320.95	1.83709	0.474414	3.87233	0.000107801	0.000610088	1.71419	up
ENSG00000162775	RBM15	133.563	1.84735	0.49591	3.72517	0.000195181	0.00102684	1.71412	up
ENSG00000077097	TOP2B	1512.57	1.74257	0.229601	7.58957	3.20981e-14	1.1462e-12	1.71407	up
ENSG00000116337	AMPD2	218.945	1.79128	0.382306	4.68547	2.79315e-06	2.41653e-05	1.71386	up
ENSG00000105289	TJP3	33.1608	1.94069	0.678879	2.85867	0.00425427	0.0146253	1.71341	up
ENSG00000175029	CTBP2	797.688	1.75935	0.295206	5.95974	2.52635e-09	4.11714e-08	1.71325	up
ENSG00000162702	ZNF281	372.555	1.79574	0.389051	4.61569	3.91784e-06	3.25182e-05	1.71181	up
ENSG00000174871	CNIH2	50.8419	1.90941	0.609628	3.13209	0.00173565	0.00685044	1.71142	up
ENSG00000225156		28.6339	2.10697	0.8934	2.35838	0.0183551	0.0491464	1.71117	up
ENSG00000164045	CDC25A	387.392	1.75101	0.273913	6.39257	1.6312e-10	3.25258e-09	1.711	up
ENSG00000188522	FAM83G	60.8306	1.88159	0.555649	3.38629	0.000708457	0.00316314	1.71066	up
ENSG00000125772	GPCPD1	328.173	1.75157	0.279372	6.26965	3.61859e-10	6.79387e-09	1.71027	up
ENSG00000113657	DPYSL3	368.521	1.75815	0.302769	5.80692	6.3633e-09	9.55107e-08	1.71001	up
ENSG00000140450	ARRDC4	86.1582	1.85463	0.519303	3.57137	0.000355113	0.00172997	1.70937	up
ENSG00000055163	CYFIP2	407.434	1.7421	0.251341	6.93122	4.17237e-12	1.08422e-10	1.70886	up
ENSG00000197136	PCNX3	177.978	1.77896	0.365191	4.87132	1.10853e-06	1.05836e-05	1.70783	up
ENSG00000088247	KHSRP	2099.94	1.78215	0.37257	4.78341	1.72344e-06	1.56803e-05	1.70705	up
ENSG00000158966	CACHD1	288.046	1.81447	0.451332	4.02025	5.81352e-05	0.000356278	1.70669	up
ENSG00000165632	TAF3	365.202	1.78262	0.377404	4.72336	2.31985e-06	2.05006e-05	1.70635	up
ENSG00000110756	HPS5	161.707	1.75547	0.306947	5.71914	1.07065e-08	1.5434e-07	1.70627	up
ENSG00000119778	ATAD2B	99.6718	1.8133	0.448123	4.04643	5.20039e-05	0.000323695	1.70576	up
ENSG00000147044	CASK	292.503	1.75851	0.316213	5.56115	2.68008e-08	3.59991e-07	1.7056	up
ENSG00000130810	PPAN	222.727	1.78326	0.385561	4.6251	3.74413e-06	3.12425e-05	1.70472	up
ENSG00000114251	WNT5A	82.1067	1.86722	0.554185	3.36931	0.000753557	0.00333838	1.70436	up
ENSG00000176393	RNPEP	653.992	1.74302	0.266822	6.53251	6.46755e-11	1.39528e-09	1.70413	up
ENSG00000099331	MYO9B	181.423	1.76304	0.333297	5.28969	1.22524e-07	1.43882e-06	1.70343	up
ENSG00000204434	POTEKP	39.5273	1.92708	0.660981	2.91548	0.00355143	0.0125526	1.70316	up
ENSG00000096717	SIRT1	284.583	1.73331	0.243675	7.11319	1.13391e-12	3.2099e-11	1.702	up
ENSG00000177283	FZD8	51.8876	1.89919	0.647391	2.9336	0.00335054	0.0119728	1.70141	up
ENSG00000158406	H4C8	65.0397	1.78554	0.39967	4.46752	7.91305e-06	6.07204e-05	1.70124	up
ENSG00000124126	PREX1	83.9023	1.79693	0.431485	4.16454	3.11987e-05	0.000206236	1.70081	up
ENSG00000148842	CNNM2	170.714	1.78139	0.381917	4.66434	3.09613e-06	2.64101e-05	1.70078	up
ENSG00000150760	DOCK1	167.919	1.78485	0.407199	4.38324	1.16925e-05	8.64144e-05	1.70076	up
ENSG00000116984	MTR	543.726	1.79183	0.412168	4.34733	1.37802e-05	9.98848e-05	1.69888	up
ENSG00000133606	MKRN1	283.998	1.75577	0.33189	5.29023	1.22165e-07	1.43615e-06	1.69696	up
ENSG00000198885	ITPRIPL1	169.037	1.80128	0.442722	4.06865	4.72866e-05	0.000298844	1.69675	up
ENSG00000166272	WBP1L	202.296	1.80682	0.453464	3.98449	6.76239e-05	0.000406338	1.69599	up
ENSG00000133835	HSD17B4	741.918	1.72263	0.236841	7.27337	3.50638e-13	1.06134e-11	1.69271	up
ENSG00000071205	ARHGAP10	266.555	1.73968	0.302182	5.75707	8.55885e-09	1.25618e-07	1.69085	up
ENSG00000142700	DMRTA2	69.5045	1.86186	0.583707	3.18972	0.00142412	0.00577522	1.6904	up
ENSG00000155111	CDK19	105.568	1.80125	0.453787	3.96937	7.20632e-05	0.000429588	1.69007	up
ENSG00000038382	TRIO	121.24	1.81074	0.488517	3.7066	0.000210061	0.00109798	1.6894	up
ENSG00000154822	PLCL2	125.588	1.73096	0.29541	5.85952	4.642e-09	7.16935e-08	1.68845	up
ENSG00000060237	WNK1	702.202	1.73115	0.283907	6.09762	1.07659e-09	1.86433e-08	1.68833	up
ENSG00000155970	MICU3	75.7814	1.80181	0.45505	3.95958	7.50824e-05	0.000445278	1.68822	up
ENSG00000124260	MAGEA10	461.396	1.70944	0.211247	8.09211	5.86391e-16	2.60467e-14	1.68625	up
ENSG00000112531	QKI	1320.51	1.72436	0.266131	6.47936	9.21117e-11	1.92633e-09	1.68618	up
ENSG00000121060	TRIM25	508.756	1.70998	0.213454	8.01099	1.13787e-15	4.84735e-14	1.68613	up
ENSG00000275832	ARHGAP23	33.2391	1.92023	0.678043	2.83201	0.00462558	0.0156846	1.68605	up
ENSG00000130449	ZSWIM6	103.822	1.91126	0.648968	2.94507	0.00322877	0.0115903	1.68524	up
ENSG00000173064	HECTD4	101.729	1.82817	0.530832	3.44397	0.000573229	0.00263401	1.68492	up
ENSG00000112159	MDN1	356.996	1.7296	0.29322	5.89864	3.66504e-09	5.76229e-08	1.68478	up
ENSG00000168061	SAC3D1	773.606	1.75166	0.357154	4.90449	9.36691e-07	9.08183e-06	1.68476	up
ENSG00000183741	CBX6	273.968	1.75875	0.375907	4.67868	2.88728e-06	2.48518e-05	1.68384	up
ENSG00000117676	RPS6KA1	261.405	1.74607	0.34308	5.08942	3.59169e-07	3.82332e-06	1.68369	up
ENSG00000186767	SPIN4	158.668	1.75378	0.374041	4.68872	2.74914e-06	2.38507e-05	1.68356	up
ENSG00000174564	IL20RB	132.426	1.75696	0.382215	4.59678	4.29079e-06	3.52522e-05	1.68299	up
ENSG00000180891	CUEDC1	75.9509	1.82942	0.53529	3.41763	0.00063168	0.00286168	1.68242	up
ENSG00000146414	SHPRH	80.7574	1.78997	0.458102	3.90735	9.33124e-05	0.000538629	1.68044	up
ENSG00000241743	XACT	182.35	1.90127	0.652625	2.91326	0.00357671	0.0126182	1.68021	up
ENSG00000120694	HSPH1	1205.47	1.72528	0.285259	6.04811	1.46551e-09	2.48082e-08	1.6802	up
ENSG00000136068	FLNB	142.016	1.76351	0.407499	4.32764	1.50716e-05	0.000108098	1.67962	up
ENSG00000110693	SOX6	107.265	1.81252	0.504199	3.59485	0.000324579	0.00160049	1.67944	up
ENSG00000163510	CWC22	460.067	1.72563	0.295898	5.83184	5.48206e-09	8.31979e-08	1.67822	up
ENSG00000198752	CDC42BPB	204.55	1.74068	0.34793	5.00297	5.64527e-07	5.75159e-06	1.67814	up
ENSG00000230797	YY2	46.656	2.06494	0.823743	2.50678	0.0121836	0.0350298	1.67725	up
ENSG00000167670	CHAF1A	1067.02	1.70591	0.234209	7.28369	3.24803e-13	9.91376e-12	1.67713	up
ENSG00000268573		39.9352	1.96624	0.743303	2.64528	0.00816238	0.0252128	1.67685	up
ENSG00000174233	ADCY6	41.16	1.92957	0.732099	2.63567	0.00839702	0.025799	1.67684	up
ENSG00000118058	KMT2A	260.176	1.72639	0.308675	5.59289	2.23317e-08	3.04453e-07	1.67607	up
ENSG00000134987	WDR36	282.201	1.70925	0.251491	6.79646	1.07221e-11	2.60645e-10	1.67543	up
ENSG00000171132	PRKCE	33.4731	1.93085	0.706774	2.73192	0.00629668	0.0203141	1.67503	up
ENSG00000198911	SREBF2	1160.65	1.70449	0.238899	7.13476	9.69548e-13	2.78064e-11	1.67467	up
ENSG00000115368	WDR75	750.464	1.74885	0.374274	4.67263	2.97367e-06	2.54749e-05	1.67449	up
ENSG00000130700	GATA5	57.7529	1.8846	0.625346	3.01369	0.0025809	0.00961522	1.67436	up
ENSG00000157985	AGAP1	264.129	1.73159	0.336576	5.14472	2.67919e-07	2.92317e-06	1.67279	up
ENSG00000196456	ZNF775	80.9654	1.83418	0.562666	3.2598	0.00111489	0.0046815	1.67205	up
ENSG00000012232	EXTL3	397.444	1.73279	0.339278	5.10728	3.26829e-07	3.51502e-06	1.67197	up
ENSG00000100802	C14orf93	104.314	1.84854	0.572901	3.22663	0.00125255	0.00518017	1.67042	up
ENSG00000138685	FGF2	118.695	1.75751	0.411215	4.27395	1.92043e-05	0.00013383	1.67029	up
ENSG00000168781	PPIP5K1	47.6611	1.87051	0.642848	2.90972	0.0036175	0.0127326	1.6701	up
ENSG00000197951	ZNF71	82.3327	1.85684	0.609115	3.04842	0.00230049	0.00871466	1.66957	up
ENSG00000228672	PROB1	84.1601	1.765	0.459008	3.84525	0.000120432	0.00067433	1.66893	up
ENSG00000155966	AFF2	27.168	2.09585	0.88659	2.36394	0.0180816	0.0485688	1.66837	up
ENSG00000171914	TLN2	221.768	1.72776	0.342907	5.03857	4.69018e-07	4.8463e-06	1.66812	up
ENSG00000083168	KAT6A	463.751	1.72349	0.328726	5.24294	1.58041e-07	1.81877e-06	1.6676	up
ENSG00000143970	ASXL2	181.859	1.70818	0.283849	6.01791	1.76681e-09	2.95194e-08	1.66549	up
ENSG00000179542	SLITRK4	108.829	1.82179	0.642694	2.83462	0.00458806	0.0155767	1.66443	up
ENSG00000065882	TBC1D1	714.145	1.70136	0.265637	6.40485	1.50519e-10	3.02616e-09	1.66437	up
ENSG00000107290	SETX	193.991	1.74355	0.380694	4.57992	4.65162e-06	3.78186e-05	1.6641	up
ENSG00000118200	CAMSAP2	271.218	1.77062	0.435539	4.06535	4.79605e-05	0.000302403	1.66367	up
ENSG00000185024	BRF1	202.821	1.75517	0.422778	4.15152	3.30274e-05	0.000216816	1.66318	up
ENSG00000153012	LGI2	140.128	1.96331	0.763299	2.57214	0.0101072	0.0300693	1.66135	up
ENSG00000168286	THAP11	376.471	1.69599	0.26224	6.46734	9.97428e-11	2.074e-09	1.66044	up
ENSG00000137642	SORL1	361.956	1.72022	0.340485	5.05226	4.36613e-07	4.55019e-06	1.66042	up
ENSG00000172534	HCFC1	509.334	1.68593	0.225459	7.47777	7.55942e-14	2.55338e-12	1.6595	up
ENSG00000008735	MAPK8IP2	125.394	1.81553	0.555062	3.27086	0.00107221	0.00452796	1.6589	up
ENSG00000158109	TPRG1L	75.0991	1.74091	0.407252	4.27478	1.91328e-05	0.000133477	1.65875	up
ENSG00000125844	RRBP1	355.324	1.67821	0.208607	8.04486	8.63423e-16	3.75134e-14	1.65598	up
ENSG00000163602	RYBP	377.41	1.75338	0.431276	4.06557	4.79146e-05	0.000302288	1.6554	up
ENSG00000117000	RLF	255.312	1.71819	0.348719	4.92715	8.34383e-07	8.17695e-06	1.65538	up
ENSG00000169635	HIC2	247.057	1.71485	0.340394	5.03783	4.70848e-07	4.86062e-06	1.65534	up
ENSG00000065361	ERBB3	332.306	1.67976	0.217645	7.71789	1.18275e-14	4.47196e-13	1.65492	up
ENSG00000121454	LHX4	32.2587	1.94579	0.760051	2.56008	0.0104649	0.0309262	1.65242	up
ENSG00000133275	CSNK1G2	424.206	1.67404	0.205959	8.128	4.36425e-16	1.95844e-14	1.6522	up
ENSG00000174010	KLHL15	67.9366	1.74083	0.412729	4.21785	2.46645e-05	0.000166931	1.6522	up
ENSG00000114423	CBLB	62.4443	1.76842	0.486619	3.63408	0.000278969	0.00139894	1.65176	up
ENSG00000132182	NUP210	1332.9	1.68241	0.246503	6.82513	8.78483e-12	2.17176e-10	1.65105	up
ENSG00000103260	METRN	559.942	1.68315	0.250366	6.72274	1.78341e-11	4.21803e-10	1.651	up
ENSG00000149474	KAT14	130.884	1.74043	0.421679	4.12737	3.66934e-05	0.000238082	1.65042	up
ENSG00000151640	DPYSL4	120.58	1.76282	0.488667	3.60739	0.00030929	0.00153375	1.64978	up
ENSG00000068366	ACSL4	156.449	1.73166	0.388154	4.46129	8.14694e-06	6.23619e-05	1.64947	up
ENSG00000101654	RNMT	783.268	1.69838	0.306899	5.53401	3.12997e-08	4.13808e-07	1.64923	up
ENSG00000102580	DNAJC3	504.928	1.68478	0.265162	6.35377	2.10098e-10	4.12161e-09	1.64774	up
ENSG00000182934	SRPRA	335.469	1.74189	0.428222	4.06772	4.74745e-05	0.000299858	1.64737	up
ENSG00000141576	RNF157	120.214	1.73737	0.429391	4.04612	5.20731e-05	0.000324034	1.64657	up
ENSG00000173681	BCLAF3	91.6187	1.81993	0.57687	3.15484	0.00160586	0.00639826	1.64608	up
ENSG00000125885	MCM8	315.866	1.67157	0.229539	7.2823	3.28173e-13	9.98871e-12	1.64407	up
ENSG00000166073	GPR176	127.706	1.7314	0.41732	4.14884	3.3416e-05	0.000219038	1.64374	up
ENSG00000183864	TOB2	249.06	1.69929	0.328093	5.17928	2.22739e-07	2.47848e-06	1.64337	up
ENSG00000167202	TBC1D2B	57.3102	1.81634	0.579193	3.13599	0.00171274	0.0067747	1.64306	up
ENSG00000159399	HK2	201.609	1.68413	0.28297	5.9516	2.65531e-09	4.30803e-08	1.64303	up
ENSG00000119669	IRF2BPL	407.086	1.6881	0.29809	5.66305	1.48707e-08	2.09397e-07	1.64293	up
ENSG00000100354	TNRC6B	563.385	1.66615	0.212306	7.84785	4.23228e-15	1.694e-13	1.64281	up
ENSG00000114554	PLXNA1	283.343	1.76089	0.481883	3.65417	0.000258011	0.00130734	1.64235	up
ENSG00000162542	TMCO4	35.5488	1.8543	0.709354	2.61407	0.00894704	0.0271681	1.64175	up
ENSG00000279365		9.30743	1.98016	0.837404	2.36464	0.0180477	0.0485016	1.6415	up
ENSG00000137843	PAK6	63.5931	1.86435	0.68594	2.71795	0.0065687	0.0210302	1.64098	up
ENSG00000131626	PPFIA1	314.623	1.71762	0.386906	4.43936	9.02266e-06	6.83233e-05	1.64093	up
ENSG00000090776	EFNB1	481.241	1.67547	0.266099	6.29641	3.04613e-10	5.79879e-09	1.63955	up
ENSG00000075420	FNDC3B	125.478	1.741	0.448372	3.88292	0.000103208	0.000588139	1.63901	up
ENSG00000185900	POMK	455.478	1.68945	0.315907	5.34793	8.89653e-08	1.07536e-06	1.63795	up
ENSG00000014123	UFL1	565.892	1.68861	0.312228	5.40827	6.36371e-08	7.94246e-07	1.63756	up
ENSG00000135829	DHX9	1301.79	1.66273	0.222909	7.45926	8.70098e-14	2.91643e-12	1.63654	up
ENSG00000133858	ZFC3H1	163.472	1.74502	0.453467	3.84817	0.000119006	0.000667544	1.63638	up
ENSG00000130695	CEP85	158.469	1.73174	0.433549	3.99433	6.48767e-05	0.000392095	1.63518	up
ENSG00000197323	TRIM33	535.824	1.67881	0.291513	5.75895	8.46405e-09	1.2431e-07	1.63507	up
ENSG00000223572	CKMT1A	58.9202	1.75564	0.470826	3.72886	0.000192349	0.00101487	1.63425	up
ENSG00000198730	CTR9	629.816	1.65688	0.211649	7.82841	4.94067e-15	1.95959e-13	1.63384	up
ENSG00000155561	NUP205	538.335	1.66554	0.250703	6.64347	3.06388e-11	6.92431e-10	1.63299	up
ENSG00000183655	KLHL25	172.977	1.69464	0.350327	4.83731	1.31608e-06	1.23123e-05	1.63299	up
ENSG00000150990	DHX37	174.902	1.69323	0.340349	4.97497	6.5257e-07	6.54487e-06	1.63272	up
ENSG00000103502	CDIPT	471.668	1.65706	0.2203	7.52184	5.40113e-14	1.85592e-12	1.63253	up
ENSG00000003756	RBM5	275.446	1.68644	0.328278	5.13721	2.78841e-07	3.03325e-06	1.63168	up
ENSG00000110427	KIAA1549L	15.8517	1.84924	0.672101	2.75143	0.00593357	0.0193685	1.63112	up
ENSG00000197785	ATAD3A	1077.28	1.70156	0.369469	4.60543	4.11607e-06	3.39957e-05	1.63063	up
ENSG00000147231	RADX	113.847	1.81783	0.612986	2.96554	0.00302155	0.0109707	1.6305	up
ENSG00000000457	SCYL3	60.2966	1.7309	0.449853	3.84771	0.000119227	0.000668616	1.63026	up
ENSG00000149930	TAOK2	242.66	1.7009	0.375706	4.52722	5.97648e-06	4.7271e-05	1.62991	up
ENSG00000148606	POLR3A	453.217	1.67581	0.299425	5.59676	2.18391e-08	2.97922e-07	1.62945	up
ENSG00000166908	PIP4K2C	73.834	1.68721	0.339876	4.96418	6.89905e-07	6.89401e-06	1.62929	up
ENSG00000110811	P3H3	426.853	1.66617	0.271648	6.13357	8.59283e-10	1.50955e-08	1.62864	up
ENSG00000170837	GPR27	334.196	1.67297	0.302018	5.53932	3.03657e-08	4.03411e-07	1.6273	up
ENSG00000159753	CARMIL2	139.742	1.73671	0.470288	3.69286	0.000221749	0.00114973	1.62687	up
ENSG00000144724	PTPRG	279.112	1.65686	0.250651	6.61023	3.8372e-11	8.5657e-10	1.62633	up
ENSG00000127463	EMC1	842.06	1.6814	0.331047	5.07904	3.79345e-07	4.01268e-06	1.6258	up
ENSG00000116698	SMG7	279.673	1.65248	0.228417	7.23446	4.67377e-13	1.38778e-11	1.6256	up
ENSG00000165209	STRBP	644.816	1.71386	0.414536	4.1344	3.55876e-05	0.000231468	1.62559	up
ENSG00000170242	USP47	343.502	1.65925	0.254438	6.52122	6.97391e-11	1.49127e-09	1.62531	up
ENSG00000151914	DST	616.804	1.66876	0.285669	5.8416	5.1703e-09	7.88498e-08	1.62446	up
ENSG00000123364	HOXC13	136.782	1.67612	0.324488	5.16542	2.39898e-07	2.64918e-06	1.62395	up
ENSG00000124151	NCOA3	38.3162	1.84789	0.678957	2.72166	0.00649541	0.0208291	1.62344	up
ENSG00000160703	NLRX1	110.762	1.68578	0.360237	4.67965	2.87368e-06	2.47445e-05	1.62277	up
ENSG00000159335	PTMS	2649.18	1.64847	0.225884	7.29788	2.92345e-13	8.99845e-12	1.62245	up
ENSG00000123200	ZC3H13	966.477	1.69492	0.377075	4.49491	6.95979e-06	5.40701e-05	1.62238	up
ENSG00000078687	TNRC6C	125.457	1.71436	0.43376	3.95231	7.73995e-05	0.000457159	1.62232	up
ENSG00000167325	RRM1	2024.94	1.6479	0.224148	7.35183	1.95509e-13	6.19224e-12	1.62205	up
ENSG00000099804	CDC34	564.208	1.70976	0.418706	4.08343	4.43758e-05	0.000281751	1.62184	up
ENSG00000173210	ABLIM3	27.7824	1.85417	0.769822	2.40857	0.0160153	0.0440306	1.62148	up
ENSG00000198914	POU3F3	104.044	1.73146	0.474529	3.64879	0.000263482	0.00133228	1.6211	up
ENSG00000114302	PRKAR2A	1853.25	1.67147	0.315109	5.30442	1.13032e-07	1.33921e-06	1.62047	up
ENSG00000153786	ZDHHC7	281.3	1.67738	0.33553	4.9992	5.757e-07	5.84636e-06	1.62041	up
ENSG00000163611	SPICE1	22.9078	1.87619	0.729913	2.57042	0.0101574	0.030185	1.62007	up
ENSG00000106948	AKNA	298.326	1.71496	0.438249	3.91322	9.10742e-05	0.00052752	1.61982	up
ENSG00000226499		76.1802	1.70112	0.408781	4.16144	3.16249e-05	0.000208612	1.6198	up
ENSG00000088367	EPB41L1	143.794	1.69334	0.378483	4.47402	7.67608e-06	5.9193e-05	1.61916	up
ENSG00000164056	SPRY1	108.25	1.72926	0.473697	3.65055	0.000261676	0.00132438	1.61895	up
ENSG00000166311	SMPD1	164.064	1.77058	0.560301	3.16005	0.00157741	0.00630559	1.61754	up
ENSG00000163975	MELTF	168.314	1.73831	0.499932	3.47709	0.000506884	0.00236042	1.61691	up
ENSG00000119927	GPAM	181.613	1.68087	0.340182	4.94108	7.7691e-07	7.66969e-06	1.61639	up
ENSG00000215105	TTC3P1	29.945	1.765	0.565156	3.12303	0.00179002	0.00702947	1.6156	up
ENSG00000182150	ERCC6L2	244.814	1.74759	0.502385	3.47859	0.000504057	0.00235026	1.61522	up
ENSG00000188517	COL25A1	173.785	1.6714	0.338831	4.93282	8.10488e-07	7.95653e-06	1.61419	up
ENSG00000264522	OTUD7B	179.502	1.7243	0.470911	3.66161	0.000250631	0.00127527	1.61383	up
ENSG00000128805	ARHGAP22	96.5971	1.93368	0.809054	2.39005	0.0168459	0.0458582	1.61381	up
ENSG00000188636	RTL6	143.685	1.69878	0.413561	4.10768	3.99662e-05	0.000257076	1.61375	up
ENSG00000065717	TLE2	223.504	1.76481	0.557895	3.16333	0.00155975	0.00624528	1.61368	up
ENSG00000174243	DDX23	526.343	1.68663	0.37935	4.44612	8.74363e-06	6.63944e-05	1.61364	up
ENSG00000157657	ZNF618	281.376	1.68889	0.384348	4.39418	1.11193e-05	8.28787e-05	1.61323	up
ENSG00000152104	PTPN14	646.553	1.71567	0.43935	3.90501	9.42204e-05	0.00054301	1.61239	up
ENSG00000120594	PLXDC2	95.2564	1.66472	0.333093	4.99776	5.80005e-07	5.88734e-06	1.61172	up
ENSG00000130147	SH3BP4	189.026	1.66279	0.32736	5.0794	3.78629e-07	4.00705e-06	1.61062	up
ENSG00000162599	NFIA	138.238	1.69479	0.409352	4.14018	3.47032e-05	0.000226389	1.61042	up
ENSG00000109654	TRIM2	416.086	1.68284	0.375568	4.48078	7.43708e-06	5.74717e-05	1.60966	up
ENSG00000088002	SULT2B1	47.5153	1.87866	0.753071	2.49467	0.0126074	0.0360387	1.60919	up
ENSG00000124198	ARFGEF2	162.428	1.73813	0.499977	3.47642	0.000508163	0.00236536	1.60918	up
ENSG00000163714	U2SURP	1597.48	1.63088	0.20987	7.7709	7.79282e-15	2.99305e-13	1.60825	up
ENSG00000001561	ENPP4	91.6068	1.7814	0.591528	3.01153	0.00259935	0.00966913	1.60808	up
ENSG00000035928	RFC1	2024.7	1.6453	0.269773	6.09882	1.06854e-09	1.85332e-08	1.60777	up
ENSG00000092421	SEMA6A	1055.25	1.64369	0.267792	6.13792	8.361e-10	1.47475e-08	1.60727	up
ENSG00000173338	KCNK7	40.3961	1.76779	0.574777	3.07561	0.00210075	0.00805716	1.60725	up
ENSG00000138160	KIF11	985.876	1.63949	0.251797	6.51118	7.45643e-11	1.58978e-09	1.60692	up
ENSG00000188042	ARL4C	341.815	1.65273	0.29355	5.63014	1.80068e-08	2.49696e-07	1.60652	up
ENSG00000260196		156.28	1.77381	0.572187	3.10005	0.00193485	0.00750119	1.60629	up
ENSG00000078747	ITCH	197.289	1.66672	0.344472	4.83848	1.30833e-06	1.22555e-05	1.60602	up
ENSG00000127481	UBR4	275.745	1.69112	0.413805	4.08676	4.37437e-05	0.000278385	1.60548	up
ENSG00000147130	ZMYM3	223.101	1.66025	0.337188	4.9238	8.48775e-07	8.3031e-06	1.6049	up
ENSG00000197081	IGF2R	640.771	1.63381	0.244027	6.69518	2.15399e-11	5.02384e-10	1.60392	up
ENSG00000090924	PLEKHG2	54.5826	1.89025	0.776171	2.43536	0.0148771	0.0413591	1.60366	up
ENSG00000289606		23.42	1.86062	0.711532	2.61495	0.0089241	0.027121	1.60286	up
ENSG00000130402	ACTN4	636.776	1.67898	0.389001	4.31613	1.58785e-05	0.000113254	1.60268	up
ENSG00000141905	NFIC	786.605	1.67691	0.382678	4.38204	1.17575e-05	8.68361e-05	1.60246	up
ENSG00000101152	DNAJC5	326.858	1.6369	0.26348	6.21262	5.21087e-10	9.51364e-09	1.6022	up
ENSG00000153395	LPCAT1	750.91	1.66205	0.344555	4.82376	1.40874e-06	1.30713e-05	1.60217	up
ENSG00000135862	LAMC1	1115.63	1.63268	0.246389	6.62645	3.43867e-11	7.70757e-10	1.60207	up
ENSG00000140406	TLNRD1	333.645	1.65568	0.328759	5.03615	4.74977e-07	4.89723e-06	1.60174	up
ENSG00000227946	INO80D-AS1	59.9533	1.70924	0.478166	3.57457	0.000350809	0.00171244	1.60162	up
ENSG00000156140	ADAMTS3	104.54	1.73538	0.507996	3.41613	0.000635171	0.00287511	1.6016	up
ENSG00000156802	ATAD2	823.43	1.64219	0.284735	5.76744	8.0485e-09	1.18926e-07	1.60134	up
ENSG00000158941	CCAR2	307.519	1.6361	0.260408	6.28286	3.32404e-10	6.28948e-09	1.60122	up
ENSG00000131711	MAP1B	2956.15	1.64457	0.295181	5.57137	2.52738e-08	3.40737e-07	1.6004	up
ENSG00000020577	SAMD4A	66.64	1.84977	0.687422	2.69089	0.00712625	0.0224794	1.60026	up
ENSG00000175318	GRAMD2A	52.647	1.79348	0.629277	2.85007	0.004371	0.014963	1.59982	up
ENSG00000198087	CD2AP	281.955	1.66256	0.349688	4.75442	1.9902e-06	1.78034e-05	1.59973	up
ENSG00000175931	UBE2O	300.643	1.65017	0.317642	5.19508	2.0463e-07	2.29568e-06	1.59895	up
ENSG00000133131	MORC4	280.026	1.69226	0.43491	3.89106	9.98056e-05	0.000571431	1.59842	up
ENSG00000213923	CSNK1E	671.666	1.62862	0.253832	6.41612	1.39789e-10	2.82083e-09	1.59651	up
ENSG00000167985	SDHAF2	171.976	1.65889	0.353789	4.68893	2.74638e-06	2.38361e-05	1.59609	up
ENSG00000160211	G6PD	435.462	1.64206	0.303191	5.41594	6.09681e-08	7.63381e-07	1.59599	up
ENSG00000034152	MAP2K3	228.605	1.72372	0.503151	3.42586	0.000612866	0.00278917	1.59556	up
ENSG00000167264	DUS2	330.593	1.67285	0.393022	4.25638	2.07759e-05	0.000143456	1.59483	up
ENSG00000198920	KIAA0753	68.8683	1.76263	0.520103	3.389	0.000701472	0.00313625	1.5947	up
ENSG00000151468	CCDC3	143.926	1.68636	0.430523	3.917	8.96568e-05	0.000520138	1.59468	up
ENSG00000159403	C1R	380.944	1.64669	0.326271	5.04701	4.48786e-07	4.65706e-06	1.59459	up
ENSG00000102241	HTATSF1	816.413	1.6389	0.29805	5.49875	3.82501e-08	4.96683e-07	1.59442	up
ENSG00000149639	SOGA1	128.497	1.68642	0.438106	3.84935	0.00011843	0.000664654	1.59372	up
ENSG00000178904	DPY19L3	131.442	1.67431	0.402274	4.1621	3.15328e-05	0.00020813	1.59372	up
ENSG00000157827	FMNL2	133.9	1.70046	0.463256	3.67068	0.000241904	0.00124011	1.59332	up
ENSG00000177910	SPATA31C2	40.014	1.78009	0.60979	2.91919	0.0035094	0.0124201	1.59291	up
ENSG00000005189	REXO5	187.055	1.65314	0.353674	4.6742	2.95101e-06	2.53305e-05	1.59241	up
ENSG00000133612	AGAP3	486.542	1.63968	0.309688	5.29461	1.1927e-07	1.40564e-06	1.59238	up
ENSG00000254535	PABPC4L	91.6033	1.8762	0.765655	2.45045	0.0142677	0.03997	1.58981	up
ENSG00000067208	EVI5	325.316	1.64225	0.322862	5.08653	3.6467e-07	3.87621e-06	1.58952	up
ENSG00000129003	VPS13C	334.595	1.63173	0.28988	5.62898	1.81278e-08	2.51214e-07	1.58942	up
ENSG00000221823	PPP3R1	320.963	1.64884	0.346633	4.75671	1.9677e-06	1.76166e-05	1.58909	up
ENSG00000231181		47.1362	1.73707	0.55575	3.12564	0.00177418	0.00697983	1.58886	up
ENSG00000288899		333.651	1.72114	0.504323	3.41278	0.000643036	0.0029083	1.58845	up
ENSG00000220370		48.826	1.89122	0.783179	2.4148	0.0157437	0.0433765	1.58844	up
ENSG00000086758	HUWE1	601.965	1.61145	0.21413	7.52555	5.24974e-14	1.81468e-12	1.58843	up
ENSG00000166401	SERPINB8	32.7916	1.74309	0.595767	2.9258	0.00343571	0.0122108	1.5875	up
ENSG00000074755	ZZEF1	65.1459	1.76468	0.590404	2.98893	0.00279954	0.0102877	1.58641	up
ENSG00000118873	RAB3GAP2	527.575	1.62815	0.2824	5.7654	8.1465e-09	1.20131e-07	1.58631	up
ENSG00000131437	KIF3A	246.853	1.66694	0.402931	4.13705	3.51803e-05	0.00022916	1.58557	up
ENSG00000185630	PBX1	398.764	1.67185	0.412779	4.05022	5.11686e-05	0.000319314	1.5855	up
ENSG00000118689	FOXO3	525.673	1.62001	0.264494	6.12494	9.07204e-10	1.5899e-08	1.58535	up
ENSG00000145012	LPP	268.244	1.68084	0.425464	3.95062	7.79505e-05	0.000459792	1.58478	up
ENSG00000123908	AGO2	606.404	1.64275	0.339559	4.83791	1.31212e-06	1.22805e-05	1.58458	up
ENSG00000103043	VAC14	241.429	1.63458	0.319398	5.1177	3.09287e-07	3.33621e-06	1.58431	up
ENSG00000096070	BRPF3	57.2423	1.74633	0.562011	3.10729	0.00188812	0.00735001	1.58392	up
ENSG00000100994	PYGB	271.038	1.63973	0.341933	4.79545	1.62306e-06	1.48723e-05	1.58303	up
ENSG00000105875	WDR91	84.2144	1.73054	0.561511	3.08194	0.00205659	0.00791837	1.58298	up
ENSG00000119514	GALNT12	68.6913	1.67926	0.4574	3.67131	0.000241308	0.00123792	1.58297	up
ENSG00000170468	RIOX1	134.447	1.63689	0.332713	4.91982	8.66228e-07	8.45869e-06	1.5828	up
ENSG00000134046	MBD2	182.696	1.70091	0.484519	3.51052	0.000447236	0.00211834	1.58279	up
ENSG00000147421	HMBOX1	157.851	1.64115	0.342656	4.7895	1.67198e-06	1.5263e-05	1.58224	up
ENSG00000112742	TTK	680.727	1.6478	0.362294	4.54823	5.40984e-06	4.33382e-05	1.58191	up
ENSG00000137941	TTLL7	133.281	1.69162	0.463088	3.65292	0.000259274	0.00131344	1.58138	up
ENSG00000198598	MMP17	159.452	1.70586	0.518643	3.28907	0.00100518	0.00428379	1.5813	up
ENSG00000170011	MYRIP	133.095	1.62708	0.299971	5.42413	5.82359e-08	7.31009e-07	1.58071	up
ENSG00000259783	LINC02259	36.9391	4.13567	1.71036	2.41801	0.0156058	0.0430401	1.58006	up
ENSG00000016391	CHDH	436.875	1.59879	0.201798	7.92271	2.32398e-15	9.63723e-14	1.57884	up
ENSG00000111432	FZD10	93.4448	1.71492	0.525317	3.26454	0.00109642	0.00461679	1.57869	up
ENSG00000011451	WIZ	283.825	1.63476	0.34196	4.78058	1.74794e-06	1.58768e-05	1.57815	up
ENSG00000196663	TECPR2	52.1164	1.77049	0.629119	2.81424	0.0048892	0.0164231	1.57785	up
ENSG00000171763	SPATA5L1	157.617	1.64237	0.366535	4.48079	7.43667e-06	5.74717e-05	1.57703	up
ENSG00000157540	DYRK1A	232.518	1.65687	0.406413	4.07682	4.56566e-05	0.000289211	1.57545	up
ENSG00000008086	CDKL5	66.5159	1.72105	0.544347	3.16168	0.00156862	0.00627622	1.57523	up
ENSG00000179967	PPP1R14BP3	53.7691	1.68087	0.461658	3.64095	0.000271635	0.00136781	1.5751	up
ENSG00000140396	NCOA2	135.285	1.62213	0.309778	5.23643	1.63713e-07	1.87613e-06	1.57465	up
ENSG00000071242	RPS6KA2	284.863	1.613	0.28314	5.69682	1.2206e-08	1.74575e-07	1.57456	up
ENSG00000184863	RBM33	286.078	1.61868	0.307792	5.259	1.44837e-07	1.6783e-06	1.57261	up
ENSG00000108349	CASC3	361.464	1.61712	0.302096	5.353	8.65079e-08	1.04914e-06	1.57192	up
ENSG00000105642	KCNN1	93.0992	1.68179	0.479937	3.50419	0.000457998	0.00216157	1.57189	up
ENSG00000157796	WDR19	102.964	1.68739	0.476206	3.54341	0.000394995	0.0018997	1.5717	up
ENSG00000197321	SVIL	60.7756	1.66533	0.449549	3.70444	0.000211859	0.00110651	1.5705	up
ENSG00000253368	TRNP1	47.1299	1.76102	0.644712	2.73148	0.00630511	0.0203263	1.57037	up
ENSG00000167695	TLCD3A	284.298	1.67205	0.451574	3.70272	0.000213297	0.00111238	1.57027	up
ENSG00000138759	FRAS1	130.462	1.64034	0.379389	4.32365	1.5347e-05	0.000109893	1.57014	up
ENSG00000165138	ANKS6	266.275	1.60606	0.271795	5.90909	3.44002e-09	5.43982e-08	1.56983	up
ENSG00000254685	FPGT	120.265	1.7207	0.556018	3.09468	0.00197022	0.00761806	1.56954	up
ENSG00000186472	PCLO	171.456	1.65759	0.418903	3.95697	7.59065e-05	0.000449312	1.56948	up
ENSG00000198879	SFMBT2	78.2578	1.70986	0.523785	3.26443	0.00109683	0.00461764	1.56943	up
ENSG00000167680	SEMA6B	120.702	1.70373	0.527804	3.22795	0.0012468	0.00516052	1.56942	up
ENSG00000198740	ZNF652	264.554	1.65941	0.42791	3.87795	0.000105342	0.000598894	1.56909	up
ENSG00000068878	PSME4	616.848	1.60985	0.289772	5.55559	2.76681e-08	3.70957e-07	1.56838	up
ENSG00000149657	LSM14B	237.948	1.62711	0.346994	4.68917	2.74319e-06	2.38229e-05	1.56818	up
ENSG00000157216	SSBP3	632.4	1.61729	0.320086	5.05268	4.35664e-07	4.54463e-06	1.567	up
ENSG00000168612	ZSWIM1	72.4976	1.73231	0.592712	2.92268	0.00347033	0.0123118	1.5665	up
ENSG00000074054	CLASP1	202.699	1.61159	0.305902	5.26832	1.37675e-07	1.60466e-06	1.56615	up
ENSG00000126804	ZBTB1	217.446	1.6224	0.338855	4.78788	1.68556e-06	1.53805e-05	1.56613	up
ENSG00000005483	KMT2E	717.803	1.60855	0.292722	5.49513	3.90413e-08	5.06356e-07	1.56535	up
ENSG00000148180	GSN	639.617	1.57854	0.174011	9.0715	1.17386e-19	7.6123e-18	1.5643	up
ENSG00000092964	DPYSL2	1300.75	1.59819	0.261354	6.11504	9.65348e-10	1.68235e-08	1.56428	up
ENSG00000135587	SMPD2	133.057	1.65584	0.436996	3.78914	0.000151172	0.000822081	1.56411	up
ENSG00000165271	NOL6	220.586	1.64803	0.410636	4.01337	5.98589e-05	0.000364795	1.564	up
ENSG00000116127	ALMS1	376.063	1.67486	0.467863	3.57981	0.000343846	0.00168258	1.56399	up
ENSG00000148700	ADD3	807.037	1.62227	0.341473	4.75082	2.02595e-06	1.8101e-05	1.5638	up
ENSG00000118900	UBN1	227.442	1.61532	0.325979	4.95527	7.22281e-07	7.19122e-06	1.56348	up
ENSG00000135912	TTLL4	237.208	1.63401	0.386097	4.23212	2.31496e-05	0.0001579	1.56101	up
ENSG00000260400		104.796	1.73165	0.581638	2.97719	0.00290903	0.0106222	1.56092	up
ENSG00000278535	DHRS11	215.836	1.66195	0.459102	3.61999	0.000294615	0.0014673	1.55963	up
ENSG00000099889	ARVCF	99.7064	1.69257	0.530301	3.19171	0.00141431	0.00573971	1.55878	up
ENSG00000163930	BAP1	412.572	1.59983	0.291722	5.48408	4.15635e-08	5.36344e-07	1.5581	up
ENSG00000143363	PRUNE1	195.031	1.66064	0.461284	3.60003	0.000318185	0.00157195	1.55791	up
ENSG00000143469	SYT14	107.198	1.71124	0.535008	3.19853	0.00138131	0.0056246	1.55719	up
ENSG00000138193	PLCE1	123.282	1.85067	0.769615	2.40468	0.0161868	0.0443958	1.55656	up
ENSG00000105810	CDK6	790.716	1.59358	0.268778	5.92896	3.04854e-09	4.87364e-08	1.5557	up
ENSG00000116044	NFE2L2	762.942	1.57101	0.180106	8.72269	2.71661e-18	1.55416e-16	1.55521	up
ENSG00000107263	RAPGEF1	353.534	1.6039	0.32	5.0122	5.38123e-07	5.51084e-06	1.55515	up
ENSG00000101544	ADNP2	512.104	1.61518	0.351426	4.59608	4.30524e-06	3.53443e-05	1.55513	up
ENSG00000167114	SLC27A4	302.652	1.65163	0.445067	3.71098	0.00020646	0.00108071	1.55438	up
ENSG00000261351		57.5268	1.65625	0.456942	3.62464	0.000289368	0.00144545	1.5543	up
ENSG00000079102	RUNX1T1	80.5407	1.64735	0.45631	3.61016	0.000306005	0.00151987	1.55415	up
ENSG00000186376	ZNF75D	98.3623	1.78203	0.706601	2.52197	0.0116699	0.0338285	1.55395	up
ENSG00000176720	BOK	209.925	1.63683	0.417465	3.92089	8.82212e-05	0.00051249	1.55355	up
ENSG00000020633	RUNX3	285.379	1.59779	0.303945	5.25685	1.46543e-07	1.69537e-06	1.55309	up
ENSG00000167173	C15orf39	375.198	1.57283	0.207016	7.5976	3.01673e-14	1.07901e-12	1.55305	up
ENSG00000153976	HS3ST3A1	38.0472	1.78136	0.635887	2.80138	0.0050885	0.0170011	1.55222	up
ENSG00000155760	FZD7	350.282	1.61231	0.356108	4.52759	5.96609e-06	4.72059e-05	1.552	up
ENSG00000135315	CEP162	273.258	1.6631	0.450171	3.69438	0.000220424	0.00114394	1.55196	up
ENSG00000068308	OTUD5	257.334	1.59506	0.30323	5.26023	1.43878e-07	1.67072e-06	1.55148	up
ENSG00000124160	NCOA5	153.285	1.63049	0.408656	3.98988	6.61059e-05	0.000398312	1.5514	up
ENSG00000116685	KIAA2013	474.61	1.57553	0.224011	7.0333	2.01712e-12	5.52408e-11	1.55126	up
ENSG00000131759	RARA	85.4095	1.68663	0.541162	3.11667	0.00182904	0.00715699	1.5507	up
ENSG00000119689	DLST	421.078	1.59652	0.306602	5.20713	1.9178e-07	2.1604e-06	1.55043	up
ENSG00000176444	CLK2	242.993	1.63639	0.403829	4.05219	5.07413e-05	0.000316919	1.54983	up
ENSG00000196428	TSC22D2	172.976	1.66412	0.494392	3.366	0.000762664	0.00337257	1.54982	up
ENSG00000130725	UBE2M	1050.66	1.56968	0.204747	7.66648	1.76783e-14	6.54815e-13	1.54925	up
ENSG00000188130	MAPK12	603.371	1.60542	0.345182	4.65094	3.30422e-06	2.79344e-05	1.54745	up
ENSG00000154429	CCSAP	166.614	1.62082	0.388739	4.16941	3.05383e-05	0.000202729	1.54695	up
ENSG00000137817	PARP6	146.277	1.64463	0.451673	3.64121	0.000271363	0.00136676	1.54667	up
ENSG00000083444	PLOD1	611.018	1.58707	0.291168	5.45071	5.01679e-08	6.37794e-07	1.54633	up
ENSG00000132694	ARHGEF11	43.0792	1.77565	0.652002	2.72338	0.00646168	0.0207453	1.54613	up
ENSG00000104369	JPH1	102.098	1.72139	0.600477	2.8667	0.00414779	0.0143065	1.54578	up
ENSG00000187792	ZNF70	67.2233	1.73213	0.647406	2.67549	0.00746197	0.0233831	1.54575	up
ENSG00000182872	RBM10	951.471	1.61901	0.389491	4.15673	3.22837e-05	0.000212444	1.54543	up
ENSG00000185262	UBALD2	411.463	1.57914	0.269817	5.85261	4.83912e-09	7.44224e-08	1.5449	up
ENSG00000253352	TUG1	610.601	1.58543	0.284971	5.56346	2.64482e-08	3.55473e-07	1.54488	up
ENSG00000187790	FANCM	135.897	1.77901	0.684433	2.59925	0.00934289	0.0281627	1.54488	up
ENSG00000158545	ZC3H18	312.846	1.58711	0.29697	5.34435	9.07424e-08	1.09502e-06	1.54456	up
ENSG00000273604	EPOP	206.951	1.61567	0.388655	4.15709	3.22334e-05	0.000212177	1.54391	up
ENSG00000160325	CACFD1	152.19	1.68874	0.556665	3.03367	0.00241601	0.00908955	1.54309	up
ENSG00000175221	MED16	572.938	1.58442	0.297362	5.32825	9.91648e-08	1.18813e-06	1.54194	up
ENSG00000116649	SRM	2530.69	1.5663	0.224226	6.98535	2.84148e-12	7.61935e-11	1.54176	up
ENSG00000113441	LNPEP	192.147	1.6257	0.416113	3.90687	9.35009e-05	0.000539575	1.54111	up
ENSG00000121440	PDZRN3	116.967	1.75984	0.666973	2.63854	0.0083264	0.0256258	1.54085	up
ENSG00000175265	GOLGA8A	41.9026	1.66671	0.515671	3.23212	0.00122878	0.00510138	1.54084	up
ENSG00000089048	ESF1	1194.95	1.58224	0.291036	5.43658	5.43138e-08	6.86507e-07	1.54077	up
ENSG00000144645	OSBPL10	78.3079	1.68699	0.55877	3.01911	0.00253515	0.00947225	1.53938	up
ENSG00000067177	PHKA1	193.344	1.5959	0.355306	4.49162	7.0683e-06	5.48351e-05	1.53827	up
ENSG00000165699	TSC1	177.916	1.58755	0.320568	4.95231	7.33368e-07	7.29828e-06	1.53819	up
ENSG00000169118	CSNK1G1	346.494	1.6178	0.405466	3.98998	6.60797e-05	0.000398264	1.53816	up
ENSG00000142327	RNPEPL1	415.514	1.57031	0.263082	5.9689	2.3886e-09	3.91046e-08	1.53771	up
ENSG00000175224	ATG13	384.703	1.57044	0.260933	6.01856	1.75973e-09	2.9424e-08	1.53764	up
ENSG00000092853	CLSPN	1178.65	1.56643	0.242842	6.45039	1.1156e-10	2.29786e-09	1.53758	up
ENSG00000137200	CMTR1	246.036	1.57171	0.275459	5.7058	1.15798e-08	1.66381e-07	1.53687	up
ENSG00000198492	YTHDF2	1247.86	1.57433	0.280885	5.60489	2.08388e-08	2.85525e-07	1.5361	up
ENSG00000196396	PTPN1	264.929	1.5645	0.241209	6.4861	8.80872e-11	1.85633e-09	1.53604	up
ENSG00000075568	TMEM131	251.392	1.58988	0.337023	4.71741	2.38867e-06	2.10238e-05	1.5352	up
ENSG00000085276	MECOM	177.382	1.58469	0.322228	4.91792	8.747e-07	8.52238e-06	1.5351	up
ENSG00000080819	CPOX	182.648	1.61707	0.412343	3.92167	8.79379e-05	0.000511252	1.53417	up
ENSG00000133657	ATP13A3	340.967	1.57836	0.301159	5.24095	1.59756e-07	1.83463e-06	1.53386	up
ENSG00000102606	ARHGEF7	155.226	1.62508	0.433858	3.74565	0.000179925	0.000957874	1.5338	up
ENSG00000125817	CENPB	360.33	1.56452	0.262113	5.96889	2.38879e-09	3.91046e-08	1.53251	up
ENSG00000073792	IGF2BP2	613.575	1.56664	0.267843	5.8491	4.94249e-09	7.56925e-08	1.53183	up
ENSG00000092439	TRPM7	277.764	1.57914	0.315705	5.00193	5.6758e-07	5.77732e-06	1.53102	up
ENSG00000108557	RAI1	119.934	1.74358	0.649131	2.68602	0.00723096	0.0227506	1.53047	up
ENSG00000205978	NYNRIN	42.3425	1.74303	0.672041	2.59363	0.00949681	0.0285636	1.53014	up
ENSG00000105726	ATP13A1	387.646	1.57612	0.309625	5.09043	3.57259e-07	3.80502e-06	1.53001	up
ENSG00000101384	JAG1	214.568	1.57636	0.316326	4.98335	6.24921e-07	6.29546e-06	1.52981	up
ENSG00000157954	WIPI2	701.832	1.56812	0.288952	5.42691	5.73372e-08	7.21067e-07	1.52818	up
ENSG00000153339	TRAPPC8	173.825	1.59243	0.364893	4.36411	1.27644e-05	9.32019e-05	1.52771	up
ENSG00000099785	MARCHF2	89.963	1.69628	0.603349	2.81143	0.00493213	0.0165571	1.52737	up
ENSG00000082701	GSK3B	222.585	1.57972	0.328223	4.81294	1.48724e-06	1.37255e-05	1.52697	up
ENSG00000099875	MKNK2	558.934	1.56431	0.280082	5.58519	2.33447e-08	3.17076e-07	1.52684	up
ENSG00000107731	UNC5B	161.13	1.58688	0.361513	4.38955	1.13587e-05	8.42611e-05	1.5268	up
ENSG00000018510	AGPS	553.227	1.551	0.223781	6.93088	4.18228e-12	1.08551e-10	1.52679	up
ENSG00000144567	RETREG2	237.742	1.61525	0.430992	3.74774	0.000178433	0.000950397	1.52566	up
ENSG00000102554	KLF5	251.932	1.59503	0.381984	4.17565	2.97143e-05	0.000197739	1.52547	up
ENSG00000185347	TEDC1	317.894	1.64344	0.49529	3.31814	0.000906175	0.00391839	1.52546	up
ENSG00000155903	RASA2	117.5	1.56482	0.294112	5.3205	1.03483e-07	1.2358e-06	1.52426	up
ENSG00000178105	DDX10	788.131	1.56582	0.293811	5.32933	9.85744e-08	1.18245e-06	1.52414	up
ENSG00000145703	IQGAP2	495.065	1.56359	0.292399	5.34746	8.91953e-08	1.07754e-06	1.52329	up
ENSG00000005810	MYCBP2	408.824	1.61311	0.430981	3.74288	0.000181922	0.000967329	1.52327	up
ENSG00000100395	L3MBTL2	295.998	1.57176	0.323226	4.86273	1.1578e-06	1.10107e-05	1.5222	up
ENSG00000108883	EFTUD2	1003.85	1.56449	0.29675	5.27209	1.34881e-07	1.57462e-06	1.52214	up
ENSG00000167081	PBX3	228.832	1.57527	0.340398	4.62774	3.69685e-06	3.08834e-05	1.52119	up
ENSG00000171262	FAM98B	450.086	1.54963	0.244305	6.34302	2.25307e-10	4.40024e-09	1.52094	up
ENSG00000116985	BMP8B	64.486	1.66327	0.557787	2.98191	0.00286455	0.0104861	1.52047	up
ENSG00000166233	ARIH1	599.283	1.54354	0.221276	6.97563	3.04493e-12	8.08554e-11	1.51996	up
ENSG00000167674	HDGFL2	572.057	1.66806	0.564124	2.9569	0.0031075	0.0112232	1.51962	up
ENSG00000101493	ZNF516	153.178	1.69321	0.600367	2.82029	0.00479804	0.0161616	1.51955	up
ENSG00000162512	SDC3	280.953	1.58542	0.377505	4.19974	2.67217e-05	0.000179354	1.51908	up
ENSG00000197969	VPS13A	255.39	1.55967	0.287396	5.42689	5.73448e-08	7.21067e-07	1.51838	up
ENSG00000187837	H1-2	893.027	1.56203	0.307291	5.08323	3.71072e-07	3.93088e-06	1.51748	up
ENSG00000151929	BAG3	133.676	1.60146	0.436396	3.66973	0.000242804	0.00124326	1.51743	up
ENSG00000147324	MFHAS1	573.391	1.59943	0.416844	3.83699	0.000124552	0.000694025	1.51722	up
ENSG00000011566	MAP4K3	110.902	1.63514	0.494554	3.30629	0.000945386	0.00406542	1.51712	up
ENSG00000160801	PTH1R	67.1886	1.61241	0.453697	3.55394	0.000379504	0.00183315	1.51698	up
ENSG00000143674	MAP3K21	187.151	1.59672	0.406545	3.92754	8.58204e-05	0.000500272	1.51646	up
ENSG00000153560	UBP1	350.894	1.55038	0.266617	5.81502	6.06271e-09	9.14427e-08	1.5164	up
ENSG00000232533	FAM131B-AS2	42.4256	1.69235	0.647431	2.61395	0.0089503	0.0271742	1.51568	up
ENSG00000137834	SMAD6	89.3169	1.60135	0.435626	3.67597	0.00023695	0.00121928	1.51513	up
ENSG00000089057	SLC23A2	143.597	1.6064	0.445625	3.60483	0.000312353	0.00154718	1.51511	up
ENSG00000111961	SASH1	249.051	1.61141	0.450681	3.57549	0.000349568	0.00170714	1.5148	up
ENSG00000157833	GAREM2	156.762	1.57099	0.354937	4.4261	9.59518e-06	7.23079e-05	1.51404	up
ENSG00000072518	MARK2	233.822	1.57641	0.36591	4.30821	1.64585e-05	0.000116932	1.51383	up
ENSG00000135801	TAF5L	260.303	1.57417	0.351594	4.47722	7.56205e-06	5.83962e-05	1.51354	up
ENSG00000121210	TMEM131L	150.012	1.573	0.363085	4.33233	1.47542e-05	0.000105996	1.51353	up
ENSG00000198408	OGA	743.567	1.53257	0.202357	7.57359	3.63043e-14	1.29007e-12	1.51276	up
ENSG00000175054	ATR	158.292	1.64163	0.513125	3.19928	0.00137772	0.0056131	1.51268	up
ENSG00000206530	CFAP44	30.3081	1.84189	0.760169	2.423	0.0153929	0.0425873	1.51238	up
ENSG00000188986	NELFB	651.967	1.5373	0.231219	6.64867	2.95758e-11	6.71184e-10	1.51232	up
ENSG00000105127	AKAP8	348.009	1.54574	0.26917	5.74262	9.32237e-09	1.35821e-07	1.51204	up
ENSG00000179943	FIZ1	50.5043	1.73843	0.691718	2.51321	0.011964	0.0344935	1.51194	up
ENSG00000113108	APBB3	43.5633	1.70771	0.676662	2.52373	0.0116116	0.033691	1.51187	up
ENSG00000064932	SBNO2	78.6701	1.64437	0.526506	3.12317	0.00178915	0.00702734	1.51179	up
ENSG00000106829	TLE4	86.0327	1.73081	0.659213	2.62557	0.00865031	0.0263954	1.5114	up
ENSG00000067900	ROCK1	1091.81	1.53944	0.243785	6.31474	2.70616e-10	5.2106e-09	1.51075	up
ENSG00000055917	PUM2	481.909	1.56593	0.343122	4.56376	5.02462e-06	4.05795e-05	1.50925	up
ENSG00000079482	OPHN1	54.7419	1.7036	0.667964	2.55043	0.010759	0.0316159	1.50904	up
ENSG00000167487	KLHL26	91.6524	1.64895	0.545022	3.02548	0.00248239	0.00929577	1.50902	up
ENSG00000091157	WDR7	46.7225	1.63574	0.520599	3.14203	0.0016778	0.00665213	1.50796	up
ENSG00000125657	TNFSF9	48.4617	1.72325	0.695187	2.47882	0.0131816	0.0374069	1.5078	up
ENSG00000155827	RNF20	372.531	1.5546	0.31463	4.94103	7.77105e-07	7.66969e-06	1.50764	up
ENSG00000185650	ZFP36L1	166.876	1.55747	0.332335	4.68644	2.78003e-06	2.40709e-05	1.5066	up
ENSG00000104880	ARHGEF18	157.808	1.57314	0.384429	4.09215	4.27385e-05	0.000272942	1.50597	up
ENSG00000175467	SART1	480.048	1.55827	0.334396	4.65995	3.16289e-06	2.68539e-05	1.50573	up
ENSG00000087095	NLK	204.53	1.71947	0.666878	2.5784	0.00992603	0.0296465	1.50506	up
ENSG00000117984	CTSD	1062.02	1.54365	0.286547	5.38709	7.16059e-08	8.83611e-07	1.50495	up
ENSG00000178531	CTXN1	218.703	1.647	0.536565	3.06952	0.00214406	0.00819451	1.5049	up
ENSG00000167771	RCOR2	183.074	1.53721	0.267595	5.74453	9.21744e-09	1.34471e-07	1.50482	up
ENSG00000176022	B3GALT6	196.844	1.53416	0.254095	6.03773	1.56295e-09	2.63149e-08	1.50343	up
ENSG00000114019	AMOTL2	132.413	1.59587	0.443134	3.60133	0.00031659	0.00156568	1.50337	up
ENSG00000160447	PKN3	312.695	1.58076	0.408128	3.87318	0.000107422	0.000608662	1.50326	up
ENSG00000179673	RPRML	171.818	1.56555	0.366232	4.27474	1.91362e-05	0.000133477	1.50291	up
ENSG00000087448	KLHL42	188.675	1.58717	0.425234	3.73247	0.00018961	0.00100225	1.50269	up
ENSG00000140259	MFAP1	477.533	1.52421	0.217194	7.01777	2.25442e-12	6.13551e-11	1.50199	up
ENSG00000071537	SEL1L	337.102	1.56235	0.358602	4.35679	1.31984e-05	9.60179e-05	1.50144	up
ENSG00000169981	ZNF35	74.9092	1.65907	0.569093	2.91528	0.00355368	0.0125565	1.50135	up
ENSG00000137177	KIF13A	137.481	1.59716	0.455731	3.5046	0.000457288	0.00215937	1.50101	up
ENSG00000187098	MITF	137.551	1.572	0.39716	3.9581	7.55479e-05	0.000447553	1.50088	up
ENSG00000104218	CSPP1	438.755	1.55316	0.329223	4.71766	2.38568e-06	2.10059e-05	1.50078	up
ENSG00000055483	USP36	392.689	1.52669	0.241914	6.31086	2.77492e-10	5.32425e-09	1.49972	up
ENSG00000197121	PGAP1	128.306	1.57145	0.395669	3.97163	7.13833e-05	0.000426233	1.49879	up
ENSG00000086015	MAST2	169.495	1.5391	0.299555	5.13796	2.77742e-07	3.02279e-06	1.49817	up
ENSG00000124406	ATP8A1	85.3316	1.60067	0.478093	3.34803	0.000813893	0.0035738	1.49704	up
ENSG00000108424	KPNB1	7221.5	1.54366	0.312618	4.93786	7.89833e-07	7.77173e-06	1.49685	up
ENSG00000116871	MAP7D1	396.464	1.53541	0.292373	5.25154	1.50833e-07	1.73947e-06	1.49525	up
ENSG00000184640	SEPTIN9	1183.22	1.53205	0.283287	5.40812	6.36903e-08	7.94456e-07	1.49441	up
ENSG00000126733	DACH2	34.214	1.71378	0.680901	2.51693	0.0118383	0.0341943	1.49302	up
ENSG00000148384	INPP5E	132.961	1.56785	0.407763	3.845	0.000120553	0.000674665	1.49286	up
ENSG00000128908	INO80	284.921	1.55782	0.37416	4.16352	3.13375e-05	0.000206903	1.49279	up
ENSG00000115825	PRKD3	331.597	1.58923	0.450992	3.52385	0.000425333	0.00202775	1.49075	up
ENSG00000204842	ATXN2	360.581	1.52096	0.256418	5.93154	3.00098e-09	4.80112e-08	1.4907	up
ENSG00000106031	HOXA13	108.587	1.61789	0.533154	3.03457	0.00240878	0.0090683	1.4905	up
ENSG00000167778	SPRYD3	67.1098	1.6576	0.603842	2.74509	0.00604937	0.0196584	1.48998	up
ENSG00000175395	ZNF25	58.6987	1.602	0.503665	3.18068	0.00146931	0.00593536	1.48986	up
ENSG00000268205		127.565	1.57402	0.401879	3.91666	8.97834e-05	0.000520734	1.48951	up
ENSG00000144559	TAMM41	356.482	1.57744	0.434292	3.63221	0.000281006	0.0014069	1.48951	up
ENSG00000197976	AKAP17A	113.532	1.57308	0.423816	3.71171	0.000205865	0.00107837	1.48946	up
ENSG00000135372	NAT10	789.824	1.55411	0.372941	4.16716	3.08416e-05	0.00020437	1.48824	up
ENSG00000151883	PARP8	108.505	1.57761	0.430951	3.66076	0.000251465	0.00127822	1.48812	up
ENSG00000236104	ZBTB22	141.477	1.63754	0.577062	2.83773	0.00454357	0.0154545	1.48703	up
ENSG00000134900	TPP2	429.037	1.50944	0.220094	6.85814	6.97609e-12	1.74834e-10	1.48656	up
ENSG00000149150	SLC43A1	871.844	1.50897	0.222178	6.79173	1.10798e-11	2.68743e-10	1.48594	up
ENSG00000153201	RANBP2	579.744	1.52469	0.284851	5.35261	8.66949e-08	1.05082e-06	1.48591	up
ENSG00000074370	ATP2A3	117.208	1.57979	0.454248	3.47782	0.000505503	0.00235549	1.48569	up
ENSG00000204178	MACO1	205.218	1.53612	0.3324	4.6213	3.81345e-06	3.17814e-05	1.48561	up
ENSG00000081913	PHLPP1	99.117	1.61795	0.543093	2.97915	0.00289049	0.0105633	1.48512	up
ENSG00000244306	DUXAP10	41.7782	1.63123	0.541832	3.01058	0.00260752	0.00969127	1.48341	up
ENSG00000174839	DENND6A	157.454	1.55357	0.388538	3.99851	6.37416e-05	0.000385982	1.48335	up
ENSG00000108799	EZH1	102.833	1.53639	0.349172	4.40008	1.0821e-05	8.07104e-05	1.48333	up
ENSG00000140598	EFL1	243.847	1.51751	0.273673	5.54495	2.9403e-08	3.92291e-07	1.48304	up
ENSG00000125945	ZNF436	46.6506	1.61222	0.522651	3.0847	0.00203756	0.00786171	1.48284	up
ENSG00000123636	BAZ2B	373.742	1.54019	0.35069	4.39188	1.12377e-05	8.36758e-05	1.4825	up
ENSG00000186001	LRCH3	199.473	1.66087	0.616777	2.69282	0.00708514	0.0223885	1.48249	up
ENSG00000127663	KDM4B	279.175	1.54116	0.360339	4.27697	1.89453e-05	0.000132278	1.48229	up
ENSG00000068097	HEATR6	165.571	1.52694	0.31245	4.88698	1.02392e-06	9.8576e-06	1.48161	up
ENSG00000100614	PPM1A	249.891	1.5582	0.404842	3.84891	0.000118646	0.000665697	1.48104	up
ENSG00000125962	ARMCX5	134.197	1.55549	0.407406	3.81804	0.000134516	0.000743413	1.48061	up
ENSG00000072786	STK10	112.415	1.59719	0.510936	3.12601	0.00177194	0.00697226	1.48044	up
ENSG00000131242	RAB11FIP4	319.151	1.5309	0.332647	4.60219	4.1807e-06	3.44514e-05	1.48022	up
ENSG00000198836	OPA1	672.236	1.51038	0.251062	6.01595	1.78838e-09	2.98345e-08	1.48014	up
ENSG00000185950	IRS2	98.9204	1.5814	0.475224	3.3277	0.000875667	0.00380302	1.47998	up
ENSG00000118707	TGIF2	485.735	1.5198	0.296739	5.12169	3.02809e-07	3.27441e-06	1.47964	up
ENSG00000168005	SPINDOC	196.162	1.50699	0.245308	6.14327	8.08407e-10	1.43052e-08	1.47944	up
ENSG00000061936	SFSWAP	657.103	1.52098	0.3012	5.04972	4.42465e-07	4.60146e-06	1.47884	up
ENSG00000130559	CAMSAP1	212.981	1.50789	0.256885	5.86991	4.36034e-09	6.77745e-08	1.47806	up
ENSG00000122482	ZNF644	573.285	1.54496	0.374355	4.12698	3.67564e-05	0.00023829	1.47802	up
ENSG00000105443	CYTH2	289.242	1.50941	0.262585	5.74828	9.0156e-09	1.31702e-07	1.47781	up
ENSG00000117016	RIMS3	49.7428	1.69149	0.687343	2.46091	0.0138586	0.0390241	1.47751	up
ENSG00000033327	GAB2	261.222	1.54242	0.384739	4.00902	6.09721e-05	0.000370649	1.4765	up
ENSG00000108510	MED13	314.617	1.5127	0.279336	5.41536	6.11648e-08	7.64699e-07	1.4764	up
ENSG00000165934	CPSF2	723.585	1.49766	0.218539	6.85307	7.22799e-12	1.8094e-10	1.4752	up
ENSG00000225830	ERCC6	88.0013	1.60623	0.529423	3.03393	0.00241394	0.00908559	1.47438	up
ENSG00000124074	ENKD1	213.509	1.52999	0.345061	4.43396	9.25161e-06	6.99601e-05	1.47381	up
ENSG00000158301	GPRASP2	260.248	1.51605	0.310861	4.87696	1.07732e-06	1.03262e-05	1.47346	up
ENSG00000116260	QSOX1	600.989	1.52775	0.345602	4.42055	9.84493e-06	7.40879e-05	1.47289	up
ENSG00000106415	GLCCI1	175.6	1.55548	0.421605	3.68942	0.000224768	0.00116373	1.47255	up
ENSG00000070882	OSBPL3	134.943	1.56301	0.443599	3.52347	0.000425928	0.00203015	1.47223	up
ENSG00000146433	TMEM181	278.339	1.51283	0.295465	5.12018	3.05247e-07	3.29588e-06	1.47189	up
ENSG00000143514	TP53BP2	346.246	1.50044	0.245064	6.12263	9.20439e-10	1.61051e-08	1.47083	up
ENSG00000153827	TRIP12	489.517	1.51427	0.308242	4.9126	8.98779e-07	8.72586e-06	1.46999	up
ENSG00000203883	SOX18	88.4433	1.53527	0.379565	4.04481	5.23655e-05	0.000325575	1.46994	up
ENSG00000162409	PRKAA2	221.614	1.54201	0.393653	3.91717	8.95931e-05	0.000519907	1.46963	up
ENSG00000254087	LYN	237.087	1.5189	0.327466	4.63834	3.51221e-06	2.94648e-05	1.46952	up
ENSG00000100034	PPM1F	184.15	1.55259	0.428446	3.62376	0.00029035	0.00144936	1.46936	up
ENSG00000054793	ATP9A	149.582	1.54336	0.409432	3.76952	0.000163563	0.000881723	1.46819	up
ENSG00000197362	ZNF786	64.7995	1.53847	0.397303	3.8723	0.000107814	0.000610088	1.46817	up
ENSG00000140575	IQGAP1	329.501	1.50576	0.285442	5.27517	1.32632e-07	1.55168e-06	1.46805	up
ENSG00000148672	GLUD1	1095.8	1.4817	0.177364	8.35399	6.59976e-17	3.27055e-15	1.4672	up
ENSG00000167311	ART5	197.802	1.56974	0.48052	3.26674	0.00108793	0.00458443	1.46716	up
ENSG00000114450	GNB4	570.453	1.50273	0.279979	5.36731	7.99216e-08	9.76849e-07	1.46597	up
ENSG00000100605	ITPK1	438.352	1.50553	0.298947	5.03612	4.75067e-07	4.89723e-06	1.46462	up
ENSG00000117707	PROX1	57.4545	1.70165	0.6918	2.45974	0.0139036	0.0391156	1.4645	up
ENSG00000138185	ENTPD1	117.861	1.67749	0.623288	2.69135	0.00711636	0.0224644	1.46448	up
ENSG00000085741	WNT11	35.9889	1.63961	0.606829	2.70193	0.00689384	0.0218916	1.46441	up
ENSG00000146085	MMUT	443.394	1.51105	0.318641	4.74217	2.11443e-06	1.88416e-05	1.46373	up
ENSG00000155858	LSM11	169.629	1.51682	0.345125	4.39499	1.10775e-05	8.25959e-05	1.46351	up
ENSG00000169249	ZRSR2	329.706	1.50263	0.293401	5.12143	3.03221e-07	3.27724e-06	1.46329	up
ENSG00000105664	COMP	334.888	1.49003	0.241749	6.16352	7.11445e-10	1.27233e-08	1.46295	up
ENSG00000124587	PEX6	203.767	1.50352	0.30177	4.98234	6.28214e-07	6.31799e-06	1.46247	up
ENSG00000153250	RBMS1	803.97	1.49087	0.245441	6.07426	1.24563e-09	2.13842e-08	1.46195	up
ENSG00000198720	ANKRD13B	177.404	1.55522	0.457835	3.3969	0.000681543	0.00305715	1.46177	up
ENSG00000075340	ADD2	820.891	1.51977	0.35909	4.23227	2.31339e-05	0.000157842	1.4611	up
ENSG00000040633	PHF23	231.522	1.50787	0.318108	4.74011	2.13599e-06	1.89988e-05	1.46092	up
ENSG00000160710	ADAR	660.899	1.47948	0.19954	7.41444	1.22139e-13	4.00183e-12	1.46091	up
ENSG00000139132	FGD4	106.017	1.66659	0.671466	2.48201	0.0130643	0.0371416	1.46015	up
ENSG00000006016	CRLF1	1204.11	1.49906	0.290522	5.1599	2.47088e-07	2.71622e-06	1.46015	up
ENSG00000123159	GIPC1	463.073	1.50483	0.312098	4.82165	1.42374e-06	1.31896e-05	1.46002	up
ENSG00000124191	TOX2	119.374	1.544	0.439766	3.51095	0.000446512	0.00211626	1.45992	up
ENSG00000140015	KCNH5	28.0041	1.63441	0.658277	2.48286	0.0130333	0.0370582	1.45923	up
ENSG00000073969	NSF	131.952	1.53127	0.401897	3.81012	0.000138899	0.000765381	1.4584	up
ENSG00000128059	PPAT	697.3	1.49431	0.280987	5.31808	1.0487e-07	1.25099e-06	1.45781	up
ENSG00000148154	UGCG	297.214	1.51838	0.363785	4.17385	2.99501e-05	0.000199127	1.45672	up
ENSG00000112983	BRD8	676.749	1.49647	0.294923	5.07411	3.89315e-07	4.10622e-06	1.45671	up
ENSG00000163811	WDR43	1482.83	1.46887	0.163626	8.97701	2.78213e-19	1.71753e-17	1.4566	up
ENSG00000004487	KDM1A	1342.57	1.4746	0.198524	7.42781	1.10411e-13	3.63939e-12	1.45648	up
ENSG00000015532	XYLT2	174.768	1.53792	0.425428	3.61499	0.000300365	0.00149423	1.4562	up
ENSG00000196876	SCN8A	74.1155	1.53729	0.428603	3.58676	0.000334817	0.00164244	1.45569	up
ENSG00000101144	BMP7	215.362	1.51295	0.351656	4.30234	1.69003e-05	0.000119605	1.45543	up
ENSG00000101882	NKAP	540.753	1.49055	0.274715	5.42583	5.76868e-08	7.2495e-07	1.4554	up
ENSG00000176208	ATAD5	359.577	1.56998	0.492541	3.18751	0.00143501	0.00581616	1.45507	up
ENSG00000163029	SMC6	594.634	1.47922	0.230395	6.42037	1.35947e-10	2.76371e-09	1.4548	up
ENSG00000158321	AUTS2	196.508	1.50994	0.355805	4.24373	2.19838e-05	0.000150748	1.45347	up
ENSG00000280128		157.551	1.72227	0.723199	2.38146	0.0172443	0.0467332	1.45307	up
ENSG00000128829	EIF2AK4	787.23	1.49491	0.302768	4.93746	7.91468e-07	7.78431e-06	1.45267	up
ENSG00000101638	ST8SIA5	53.3903	1.61894	0.596551	2.71383	0.00665096	0.0212376	1.45232	up
ENSG00000014919	COX15	591.752	1.48226	0.253587	5.84517	5.06042e-09	7.72819e-08	1.45207	up
ENSG00000113194	FAF2	583.156	1.47844	0.242381	6.09967	1.06286e-09	1.84494e-08	1.45137	up
ENSG00000185668	POU3F1	59.9554	1.57678	0.546425	2.88562	0.00390638	0.0135803	1.45125	up
ENSG00000224078	SNHG14	3189.14	1.4751	0.220299	6.69588	2.14375e-11	5.01065e-10	1.45104	up
ENSG00000174227	PIGG	127.255	1.64663	0.663574	2.48146	0.0130846	0.0371895	1.45099	up
ENSG00000196365	LONP1	2059.6	1.49087	0.295194	5.05048	4.40712e-07	4.58634e-06	1.45096	up
ENSG00000049656	CLPTM1L	1084.75	1.47344	0.222475	6.62293	3.52154e-11	7.87715e-10	1.45081	up
ENSG00000143322	ABL2	439.622	1.52938	0.413875	3.69528	0.000219643	0.0011407	1.45074	up
ENSG00000101347	SAMHD1	449.268	1.50553	0.350138	4.29983	1.70931e-05	0.000120773	1.44944	up
ENSG00000151718	WWC2	575.076	1.48771	0.28758	5.17323	2.30088e-07	2.55116e-06	1.44919	up
ENSG00000064300	NGFR	167.904	1.51849	0.401178	3.78507	0.000153667	0.00083497	1.44844	up
ENSG00000167972	ABCA3	318.296	1.49445	0.324744	4.60192	4.18612e-06	3.4483e-05	1.44839	up
ENSG00000175073	VCPIP1	97.4497	1.52626	0.413589	3.69027	0.000224012	0.00116036	1.44831	up
ENSG00000005700	IBTK	338.587	1.50129	0.342461	4.38383	1.16612e-05	8.62708e-05	1.44722	up
ENSG00000181827	RFX7	147.809	1.49732	0.332001	4.50999	6.4832e-06	5.08374e-05	1.44697	up
ENSG00000136026	CKAP4	2108.43	1.49032	0.309302	4.81835	1.44752e-06	1.33986e-05	1.44694	up
ENSG00000139354	GAS2L3	139.93	1.49027	0.307151	4.85193	1.22265e-06	1.1552e-05	1.44686	up
ENSG00000161217	PCYT1A	197.411	1.50129	0.347648	4.31843	1.57141e-05	0.000112338	1.44686	up
ENSG00000186660	ZFP91	368.236	1.48681	0.298365	4.9832	6.25397e-07	6.29546e-06	1.44628	up
ENSG00000197044	ZNF441	87.702	1.58796	0.553311	2.86993	0.00410568	0.0141747	1.44625	up
ENSG00000143437	ARNT	195.087	1.48173	0.280084	5.29028	1.22128e-07	1.43615e-06	1.44624	up
ENSG00000109320	NFKB1	214.519	1.49322	0.327947	4.55322	5.28306e-06	4.24471e-05	1.4452	up
ENSG00000100401	RANGAP1	1900.41	1.47686	0.267596	5.51899	3.40947e-08	4.46706e-07	1.44422	up
ENSG00000119522	DENND1A	128.994	1.51682	0.399503	3.79678	0.000146586	0.000801118	1.444	up
ENSG00000125843	AP5S1	109.919	1.57733	0.554788	2.84312	0.00446736	0.0152285	1.44378	up
ENSG00000018408	WWTR1	287.978	1.4853	0.306798	4.84129	1.28999e-06	1.2089e-05	1.44325	up
ENSG00000007264	MATK	337.016	1.49687	0.348014	4.30118	1.69888e-05	0.000120076	1.44263	up
ENSG00000158195	WASF2	1147.46	1.46462	0.221698	6.60637	3.93869e-11	8.77433e-10	1.44229	up
ENSG00000280161		44.2215	1.56969	0.556937	2.81843	0.00482597	0.0162382	1.44208	up
ENSG00000125676	THOC2	1126.02	1.49673	0.346725	4.31677	1.58332e-05	0.000113041	1.44179	up
ENSG00000101199	ARFGAP1	286.379	1.51843	0.415134	3.65769	0.000254494	0.00129102	1.44102	up
ENSG00000167491	GATAD2A	603.245	1.47691	0.284618	5.18911	2.11306e-07	2.3633e-06	1.44002	up
ENSG00000206560	ANKRD28	276.069	1.47835	0.292708	5.0506	4.40429e-07	4.58558e-06	1.43991	up
ENSG00000047230	CTPS2	301.215	1.48505	0.322751	4.60122	4.20025e-06	3.45864e-05	1.43864	up
ENSG00000038219	BOD1L1	603.107	1.48476	0.3131	4.74213	2.11484e-06	1.88416e-05	1.43863	up
ENSG00000127511	SIN3B	186.7	1.48732	0.332823	4.46881	7.86557e-06	6.04198e-05	1.43839	up
ENSG00000027869	SH2D2A	107.924	1.49506	0.369336	4.04797	5.16635e-05	0.000321851	1.43822	up
ENSG00000160191	PDE9A	82.5265	1.52415	0.459722	3.31537	0.000915234	0.00394975	1.43822	up
ENSG00000185946	RNPC3	175.921	1.62611	0.641479	2.53494	0.0112466	0.0327928	1.4379	up
ENSG00000047346	FAM214A	59.5839	1.58845	0.564245	2.81518	0.00487506	0.0163857	1.43714	up
ENSG00000185070	FLRT2	163.635	1.50116	0.386334	3.88564	0.000102062	0.000582668	1.43651	up
ENSG00000171794	UTF1	77.3018	1.5257	0.474364	3.21631	0.00129851	0.00534119	1.4365	up
ENSG00000146938	NLGN4X	134.226	1.52091	0.433734	3.50655	0.000453956	0.00214596	1.43576	up
ENSG00000189184	PCDH18	208.734	1.50398	0.375122	4.00931	6.08967e-05	0.000370294	1.43573	up
ENSG00000137145	DENND4C	316.453	1.47915	0.310414	4.76507	1.88788e-06	1.69994e-05	1.43554	up
ENSG00000159217	IGF2BP1	1310.89	1.4539	0.201279	7.22331	5.07355e-13	1.49632e-11	1.43521	up
ENSG00000152117	SMPD4BP	173.74	1.46965	0.286991	5.12089	3.04095e-07	3.28507e-06	1.43416	up
ENSG00000138032	PPM1B	295.812	1.46297	0.25537	5.72881	1.01135e-08	1.46662e-07	1.43365	up
ENSG00000159423	ALDH4A1	259.548	1.48798	0.349697	4.25506	2.0899e-05	0.000144078	1.43349	up
ENSG00000181090	EHMT1	287.767	1.46295	0.257194	5.68812	1.28447e-08	1.82872e-07	1.43339	up
ENSG00000135763	URB2	148.788	1.49981	0.381058	3.9359	8.28845e-05	0.000485489	1.43336	up
ENSG00000134250	NOTCH2	325.151	1.50579	0.402459	3.74149	0.000182933	0.000970345	1.43282	up
ENSG00000102786	INTS6	304.603	1.45897	0.242084	6.02671	1.67335e-09	2.80871e-08	1.43256	up
ENSG00000218336	TENM3	316.668	1.54432	0.501971	3.07652	0.00209432	0.00803673	1.43212	up
ENSG00000160963	COL26A1	245.469	1.50432	0.398911	3.77108	0.000162544	0.000877527	1.432	up
ENSG00000029363	BCLAF1	1131.55	1.45525	0.227394	6.39968	1.55707e-10	3.1276e-09	1.43147	up
ENSG00000174437	ATP2A2	730.907	1.45833	0.24511	5.94968	2.68674e-09	4.34933e-08	1.43124	up
ENSG00000154001	PPP2R5E	477.61	1.44776	0.197253	7.33961	2.14214e-13	6.76507e-12	1.43022	up
ENSG00000100578	KIAA0586	331.93	1.50374	0.403345	3.72819	0.000192861	0.00101708	1.42886	up
ENSG00000116830	TTF2	521.542	1.44864	0.209458	6.91612	4.64171e-12	1.19764e-10	1.42872	up
ENSG00000186318	BACE1	47.5937	1.60923	0.641747	2.50758	0.0121561	0.0349597	1.42841	up
ENSG00000095015	MAP3K1	110.762	1.5342	0.497746	3.08229	0.00205415	0.00791175	1.4282	up
ENSG00000136021	SCYL2	238.558	1.49799	0.397721	3.76642	0.000165604	0.000891187	1.42661	up
ENSG00000089177	KIF16B	162.418	1.48849	0.368519	4.0391	5.36556e-05	0.000332744	1.42641	up
ENSG00000115275	MOGS	327.856	1.47934	0.347411	4.25819	2.06093e-05	0.00014253	1.42589	up
ENSG00000125755	SYMPK	400.1	1.48117	0.36491	4.05901	4.92816e-05	0.000309572	1.42351	up
ENSG00000112855	HARS2	184.291	1.46281	0.292937	4.99359	5.92683e-07	6.01043e-06	1.42349	up
ENSG00000111540	RAB5B	182.622	1.49727	0.410684	3.64581	0.000266554	0.00134595	1.42341	up
ENSG00000109685	NSD2	1188.16	1.44644	0.226278	6.39232	1.63392e-10	3.25503e-09	1.42338	up
ENSG00000137275	RIPK1	78.5985	1.55306	0.541783	2.86657	0.0041494	0.0143098	1.42311	up
ENSG00000204128	C2orf72	45.023	1.57717	0.609448	2.58787	0.00965713	0.0289661	1.42306	up
ENSG00000101412	E2F1	381.261	1.48118	0.363786	4.07156	4.66983e-05	0.000295211	1.42233	up
ENSG00000203668	CHML	572.717	1.45568	0.258392	5.63363	1.76452e-08	2.44993e-07	1.42192	up
ENSG00000164076	CAMKV	288.535	1.46831	0.324833	4.5202	6.17801e-06	4.86363e-05	1.4212	up
ENSG00000151806	GUF1	471.406	1.4595	0.286667	5.09129	3.55634e-07	3.79124e-06	1.42092	up
ENSG00000151502	VPS26B	305.52	1.44816	0.255117	5.67646	1.37513e-08	1.94764e-07	1.41995	up
ENSG00000163625	WDFY3	75.6555	1.52533	0.487555	3.12853	0.00175683	0.00691905	1.41935	up
ENSG00000087274	ADD1	761.441	1.44622	0.247158	5.85138	4.87498e-09	7.48158e-08	1.41908	up
ENSG00000144730	IL17RD	90.2349	1.54319	0.526361	2.93181	0.00336989	0.0120277	1.41795	up
ENSG00000165288	BRWD3	193.276	1.47436	0.351686	4.19227	2.76178e-05	0.000184971	1.41661	up
ENSG00000129657	SEC14L1	239.081	1.46617	0.336171	4.36138	1.29246e-05	9.42774e-05	1.41635	up
ENSG00000179151	EDC3	397.007	1.435	0.208921	6.86863	6.48206e-12	1.64016e-10	1.41624	up
ENSG00000122756	CNTFR	103.507	1.51311	0.470649	3.21493	0.00130474	0.00536177	1.41562	up
ENSG00000040531	CTNS	117.381	1.5244	0.494355	3.08361	0.00204507	0.00788653	1.41474	up
ENSG00000165240	ATP7A	84.1207	1.62488	0.68392	2.37583	0.0175094	0.0472992	1.41436	up
ENSG00000178966	RMI1	310.116	1.44496	0.258114	5.59813	2.16674e-08	2.95765e-07	1.41431	up
ENSG00000130779	CLIP1	263.517	1.47685	0.380154	3.88486	0.000102389	0.000584078	1.414	up
ENSG00000163531	NFASC	59.1004	1.60551	0.672491	2.38741	0.0169676	0.0461091	1.41331	up
ENSG00000171681	ATF7IP	389.377	1.45147	0.292137	4.96844	6.74922e-07	6.75355e-06	1.41316	up
ENSG00000039068	CDH1	55.7375	1.52216	0.517073	2.9438	0.0032421	0.0116305	1.41276	up
ENSG00000111145	ELK3	128.689	1.54652	0.540793	2.85972	0.00424014	0.0145813	1.41241	up
ENSG00000289285		17.8088	1.60576	0.643474	2.49545	0.0125796	0.0359742	1.41144	up
ENSG00000139370	SLC15A4	143.331	1.51809	0.488575	3.10718	0.00188881	0.00735139	1.4113	up
ENSG00000035664	DAPK2	152.577	1.51198	0.486748	3.10628	0.0018946	0.00737003	1.41103	up
ENSG00000005100	DHX33	752.462	1.42651	0.18661	7.64433	2.10034e-14	7.69952e-13	1.41069	up
ENSG00000149480	MTA2	401.034	1.43643	0.247593	5.80159	6.56874e-09	9.83915e-08	1.40979	up
ENSG00000230002	ALMS1-IT1	66.3186	1.52352	0.509899	2.98788	0.00280922	0.0103164	1.40971	up
ENSG00000198646	NCOA6	265.182	1.46031	0.345785	4.22318	2.40878e-05	0.00016338	1.40791	up
ENSG00000060069	CTDP1	92.0175	1.61234	0.666328	2.41974	0.0155315	0.0428946	1.40766	up
ENSG00000182985	CADM1	682.735	1.45711	0.333755	4.36579	1.26661e-05	9.26081e-05	1.40756	up
ENSG00000115993	TRAK2	177.151	1.46033	0.352225	4.14602	3.383e-05	0.000221221	1.40655	up
ENSG00000183763	TRAIP	221.391	1.47285	0.387571	3.80021	0.000144574	0.00079166	1.40648	up
ENSG00000157483	MYO1E	193.696	1.47954	0.413403	3.57893	0.000345006	0.0016875	1.40563	up
ENSG00000126787	DLGAP5	1718.84	1.4548	0.332681	4.37296	1.22572e-05	9.01305e-05	1.40555	up
ENSG00000140470	ADAMTS17	48.6073	1.56583	0.622958	2.51354	0.0119527	0.0344701	1.40433	up
ENSG00000234127	TRIM26	214.663	1.46612	0.383537	3.82264	0.000132029	0.000732326	1.40366	up
ENSG00000153187	HNRNPU	4256.25	1.41835	0.184412	7.69122	1.45739e-14	5.44442e-13	1.40314	up
ENSG00000021776	AQR	327.349	1.43877	0.284182	5.06284	4.13057e-07	4.33363e-06	1.40295	up
ENSG00000033800	PIAS1	418.702	1.42461	0.223203	6.38257	1.74139e-10	3.45653e-09	1.40229	up
ENSG00000108773	KAT2A	181.914	1.44996	0.326362	4.4428	8.87953e-06	6.72862e-05	1.40227	up
ENSG00000196739	COL27A1	124.632	1.47054	0.388806	3.78218	0.000155459	0.000842553	1.40226	up
ENSG00000165185	KIAA1958	175.761	1.51131	0.498029	3.03457	0.00240877	0.0090683	1.40134	up
ENSG00000135090	TAOK3	391.717	1.43262	0.273335	5.24128	1.5947e-07	1.83232e-06	1.40044	up
ENSG00000116514	RNF19B	84.8319	1.49625	0.476889	3.13751	0.00170387	0.00674284	1.40043	up
ENSG00000160218	TRAPPC10	46.3928	1.52956	0.557978	2.74126	0.0061205	0.0198453	1.3994	up
ENSG00000132470	ITGB4	58.4635	1.48446	0.464218	3.19776	0.001385	0.00563751	1.39889	up
ENSG00000196247	ZNF107	257.918	1.4896	0.446557	3.33575	0.000850691	0.00370782	1.3979	up
ENSG00000204394	VARS1	2384.35	1.42908	0.265943	5.37364	7.71638e-08	9.4738e-07	1.39781	up
ENSG00000112739	PRPF4B	815.862	1.42316	0.239023	5.95406	2.61572e-09	4.25011e-08	1.39762	up
ENSG00000113971	NPHP3	67.9182	1.55985	0.601273	2.59424	0.00948005	0.0285245	1.39721	up
ENSG00000102870	ZNF629	147.994	1.44489	0.331956	4.35267	1.34492e-05	9.76673e-05	1.3969	up
ENSG00000164151	ICE1	396.04	1.46134	0.379928	3.84637	0.000119881	0.000671763	1.39615	up
ENSG00000227057	WDR46	1014.56	1.42205	0.242923	5.85392	4.80128e-09	7.39965e-08	1.39591	up
ENSG00000170921	TANC2	110.299	1.46536	0.406958	3.60077	0.000317282	0.00156875	1.3958	up
ENSG00000156011	PSD3	211.63	1.45242	0.357617	4.06138	4.87827e-05	0.000306873	1.39579	up
ENSG00000171714	ANO5	134.442	1.48158	0.451006	3.28506	0.00101959	0.00433759	1.3938	up
ENSG00000131771	PPP1R1B	152.983	1.43604	0.315089	4.55755	5.17533e-06	4.16888e-05	1.39346	up
ENSG00000160007	ARHGAP35	309.408	1.42374	0.266026	5.35188	8.70438e-08	1.05447e-06	1.39308	up
ENSG00000165525	NEMF	871.618	1.41712	0.231607	6.11865	9.43701e-10	1.64726e-08	1.39301	up
ENSG00000090889	KIF4A	744.686	1.41524	0.229604	6.16384	7.10014e-10	1.27082e-08	1.39254	up
ENSG00000187535	IFT140	86.6685	1.56686	0.645803	2.42622	0.0152569	0.0422376	1.39234	up
ENSG00000072501	SMC1A	902.979	1.4405	0.3319	4.34015	1.42383e-05	0.000102932	1.39199	up
ENSG00000120696	KBTBD7	149.651	1.52368	0.551763	2.76147	0.00575424	0.0188705	1.3918	up
ENSG00000196792	STRN3	430.832	1.42701	0.28197	5.06086	4.17361e-07	4.37249e-06	1.39161	up
ENSG00000175193	PARL	516.414	1.44076	0.341385	4.22032	2.43952e-05	0.000165313	1.39054	up
ENSG00000145555	MYO10	2329.14	1.41821	0.251599	5.6368	1.73238e-08	2.408e-07	1.39044	up
ENSG00000259330	INAFM2	229.91	1.44468	0.362569	3.98456	6.76057e-05	0.000406338	1.38885	up
ENSG00000163659	TIPARP	85.1748	1.47064	0.444292	3.31009	0.000932666	0.00401863	1.38867	up
ENSG00000196177	ACADSB	196.76	1.42912	0.315278	4.53289	5.81822e-06	4.61529e-05	1.38854	up
ENSG00000048828	FAM120A	485.063	1.41717	0.25553	5.54599	2.92295e-08	3.90215e-07	1.3885	up
ENSG00000009950	MLXIPL	91.4441	1.46503	0.436123	3.35922	0.000781638	0.00344741	1.38849	up
ENSG00000137571	SLCO5A1	190.247	1.44638	0.365414	3.95818	7.5522e-05	0.000447521	1.38823	up
ENSG00000130224	LRCH2	122.269	1.47451	0.429693	3.43154	0.000600169	0.00273994	1.38793	up
ENSG00000138735	PDE5A	55.7278	1.47966	0.452032	3.27336	0.00106277	0.00449674	1.38792	up
ENSG00000160741	CRTC2	140.102	1.44269	0.356125	4.05107	5.09843e-05	0.000318255	1.38717	up
ENSG00000166813	KIF7	81.3129	1.49385	0.511383	2.92119	0.00348699	0.0123528	1.38707	up
ENSG00000011275	RNF216	754.151	1.43234	0.321547	4.45453	8.40783e-06	6.4193e-05	1.38702	up
ENSG00000119912	IDE	243.159	1.45398	0.390326	3.72505	0.00019528	0.00102711	1.3867	up
ENSG00000175445	LPL	72.9725	1.5418	0.599138	2.57336	0.0100716	0.0299912	1.38647	up
ENSG00000164050	PLXNB1	62.2707	1.46384	0.41894	3.49416	0.000475564	0.00223601	1.38619	up
ENSG00000198435	NRARP	266.925	1.43166	0.33012	4.33678	1.44584e-05	0.000104213	1.38602	up
ENSG00000158161	EYA3	197.515	1.46213	0.421836	3.46612	0.000528032	0.00244691	1.38449	up
ENSG00000151474	FRMD4A	28.388	1.5089	0.576065	2.61933	0.00881028	0.0268311	1.38437	up
ENSG00000165684	SNAPC4	83.6968	1.47179	0.449678	3.27298	0.00106422	0.00450114	1.38415	up
ENSG00000182263	FIGN	198.462	1.52166	0.548635	2.77353	0.0055451	0.0183111	1.3839	up
ENSG00000141376	BCAS3	333.707	1.43686	0.355587	4.04082	5.32639e-05	0.000330596	1.38336	up
ENSG00000065243	PKN2	524.29	1.40937	0.243332	5.79197	6.95643e-09	1.03772e-07	1.38317	up
ENSG00000112715	VEGFA	245.863	1.43742	0.357996	4.01518	5.94004e-05	0.00036281	1.3831	up
ENSG00000136492	BRIP1	158.254	1.43982	0.357061	4.03241	5.5207e-05	0.000340529	1.38307	up
ENSG00000112379	ARFGEF3	197.155	1.48688	0.487204	3.05187	0.00227424	0.00863017	1.38291	up
ENSG00000151461	UPF2	573.421	1.41351	0.265174	5.33051	9.79374e-08	1.17665e-06	1.38273	up
ENSG00000076321	KLHL20	163.271	1.52415	0.56615	2.69214	0.00709957	0.0224276	1.38216	up
ENSG00000131504	DIAPH1	494.389	1.40035	0.205439	6.81639	9.3356e-12	2.29494e-10	1.38186	up
ENSG00000135776	ABCB10	343.006	1.41717	0.279057	5.07843	3.80576e-07	4.02376e-06	1.38169	up
ENSG00000163558	PRKCI	544.313	1.42213	0.309719	4.59167	4.39709e-06	3.60038e-05	1.38022	up
ENSG00000175137	SH3BP5L	148.478	1.44158	0.374874	3.84552	0.000120299	0.000673934	1.38013	up
ENSG00000165912	PACSIN3	739.866	1.41954	0.30214	4.6983	2.62341e-06	2.28779e-05	1.38	up
ENSG00000166886	NAB2	68.2416	1.54806	0.631994	2.44949	0.0143059	0.0400401	1.37997	up
ENSG00000113318	MSH3	414.382	1.44075	0.370814	3.88537	0.000102173	0.000583155	1.37947	up
ENSG00000063601	MTMR1	218.965	1.48585	0.497888	2.98432	0.00284213	0.010418	1.37915	up
ENSG00000075218	GTSE1	1086.17	1.42411	0.32145	4.43028	9.41088e-06	7.10661e-05	1.37901	up
ENSG00000108100	CCNY	395.816	1.42512	0.328215	4.34203	1.41169e-05	0.00010219	1.37858	up
ENSG00000067248	DHX29	609.99	1.39893	0.217828	6.42218	1.34338e-10	2.73609e-09	1.37829	up
ENSG00000183943	PRKX	1130.93	1.4341	0.355182	4.03766	5.39876e-05	0.000334234	1.37823	up
ENSG00000040933	INPP4A	123.237	1.49135	0.508913	2.93046	0.00338458	0.0120703	1.37787	up
ENSG00000005073	HOXA11	163.331	1.42065	0.318445	4.4612	8.1502e-06	6.2365e-05	1.37688	up
ENSG00000174804	FZD4	70.5989	1.51934	0.579909	2.61995	0.00879415	0.0267881	1.37653	up
ENSG00000054118	THRAP3	1145.51	1.40616	0.2621	5.36499	8.0954e-08	9.87259e-07	1.37605	up
ENSG00000050438	SLC4A8	133.387	1.43935	0.396094	3.63385	0.000279223	0.00139957	1.37527	up
ENSG00000101945	SUV39H1	175.919	1.43431	0.36835	3.89387	9.86592e-05	0.000565756	1.37525	up
ENSG00000106536	POU6F2	239.563	1.42722	0.337561	4.22804	2.35741e-05	0.000160445	1.37456	up
ENSG00000143702	CEP170	156.913	1.42663	0.336548	4.23902	2.24499e-05	0.000153703	1.37455	up
ENSG00000136153	LMO7	177.392	1.41225	0.300018	4.70721	2.51124e-06	2.19786e-05	1.37439	up
ENSG00000156273	BACH1	178.833	1.54302	0.616189	2.50413	0.0122751	0.0352418	1.37404	up
ENSG00000035403	VCL	916.184	1.42186	0.331203	4.29303	1.76252e-05	0.000124172	1.37387	up
ENSG00000106443	PHF14	1107.69	1.39029	0.196545	7.07361	1.5095e-12	4.18638e-11	1.37354	up
ENSG00000198380	GFPT1	530.693	1.42346	0.343859	4.13966	3.47824e-05	0.000226838	1.37312	up
ENSG00000180178	FAR2P1	20.3433	1.49784	0.58158	2.57546	0.0100108	0.0298506	1.37182	up
ENSG00000116141	MARK1	178.024	1.48877	0.520173	2.86206	0.00420897	0.0144855	1.37166	up
ENSG00000163607	GTPBP8	333.119	1.40379	0.272272	5.15585	2.52477e-07	2.76712e-06	1.37155	up
ENSG00000009830	POMT2	148.661	1.42542	0.361265	3.94564	7.95873e-05	0.000468057	1.37076	up
ENSG00000100154	TTC28	230.698	1.42522	0.35901	3.96985	7.19179e-05	0.000428956	1.3703	up
ENSG00000115808	STRN	155.575	1.41866	0.33298	4.26049	2.03981e-05	0.000141338	1.37022	up
ENSG00000168769	TET2	175.587	1.50045	0.537883	2.78954	0.00527831	0.0175628	1.37021	up
ENSG00000198815	FOXJ3	173.782	1.40881	0.309382	4.55362	5.27298e-06	4.23817e-05	1.36829	up
ENSG00000273820	USP27X	73.4441	1.47952	0.523974	2.82365	0.00474808	0.0160205	1.36827	up
ENSG00000138758	SEPTIN11	1713.88	1.38508	0.197806	7.00222	2.51944e-12	6.83974e-11	1.36808	up
ENSG00000105866	SP4	132.63	1.46213	0.466811	3.13216	0.00173525	0.00685012	1.36789	up
ENSG00000182240	BACE2	128.837	1.44359	0.437324	3.30096	0.00096354	0.00412967	1.36737	up
ENSG00000187607	ZNF286A	102.189	1.51914	0.557147	2.72664	0.00639832	0.0205843	1.36661	up
ENSG00000165300	SLITRK5	216.565	1.39799	0.272945	5.1219	3.02473e-07	3.27239e-06	1.3664	up
ENSG00000110697	PITPNM1	154.085	1.43744	0.407005	3.53174	0.000412829	0.00197374	1.36635	up
ENSG00000036672	USP2	160.434	1.4238	0.365751	3.89281	9.90906e-05	0.000567784	1.36633	up
ENSG00000067066	SP100	59.0947	1.4201	0.367007	3.86941	0.000109099	0.000616516	1.36576	up
ENSG00000147526	TACC1	299.483	1.41291	0.330176	4.27925	1.87523e-05	0.000131056	1.36573	up
ENSG00000100350	FOXRED2	111.373	1.43154	0.402928	3.55285	0.000381087	0.00183969	1.36566	up
ENSG00000198554	WDHD1	679.793	1.41	0.321087	4.39133	1.12658e-05	8.37706e-05	1.36545	up
ENSG00000119844	AFTPH	176.026	1.42166	0.364679	3.8984	9.6831e-05	0.000556233	1.36543	up
ENSG00000172939	OXSR1	343.596	1.41587	0.343118	4.12648	3.68366e-05	0.000238668	1.36497	up
ENSG00000134815	DHX34	101.69	1.45378	0.454877	3.19599	0.00139354	0.00566594	1.36495	up
ENSG00000141664	ZCCHC2	147.423	1.51533	0.590308	2.56702	0.0102576	0.0304289	1.36419	up
ENSG00000164715	LMTK2	102.568	1.44066	0.431544	3.33839	0.000842639	0.00367786	1.36355	up
ENSG00000160877	NACC1	172.945	1.4195	0.359696	3.9464	7.93365e-05	0.000466834	1.36344	up
ENSG00000138642	HERC6	102.806	1.46272	0.485321	3.01393	0.00257889	0.00960938	1.36257	up
ENSG00000115839	RAB3GAP1	479.247	1.44815	0.448607	3.2281	0.00124615	0.00515883	1.362	up
ENSG00000073150	PANX2	164.063	1.4233	0.378312	3.76225	0.000168394	0.000904643	1.36198	up
ENSG00000113163	CERT1	327.94	1.39032	0.25718	5.40603	6.44355e-08	8.02378e-07	1.36181	up
ENSG00000158158	CNNM4	115.744	1.4658	0.503848	2.90922	0.0036233	0.0127489	1.36164	up
ENSG00000135597	REPS1	341.61	1.38026	0.212585	6.49277	8.4273e-11	1.78853e-09	1.36133	up
ENSG00000115159	GPD2	183.663	1.40353	0.32187	4.36056	1.2973e-05	9.45358e-05	1.36107	up
ENSG00000109472	CPE	414.029	1.41249	0.349794	4.03808	5.38909e-05	0.000333824	1.36079	up
ENSG00000095564	BTAF1	181.39	1.42352	0.377704	3.76888	0.000163981	0.000883324	1.35898	up
ENSG00000122515	ZMIZ2	142.213	1.4229	0.39525	3.6	0.000318217	0.00157195	1.35877	up
ENSG00000108669	CYTH1	112.136	1.3883	0.274197	5.06313	4.12418e-07	4.32901e-06	1.35875	up
ENSG00000171940	ZNF217	247.626	1.39441	0.294059	4.74195	2.11668e-06	1.88416e-05	1.35816	up
ENSG00000156304	SCAF4	259.786	1.39679	0.30078	4.6439	3.41893e-06	2.87817e-05	1.35777	up
ENSG00000128245	YWHAH	791.51	1.37275	0.187837	7.30819	2.70757e-13	8.40501e-12	1.35773	up
ENSG00000043355	ZIC2	172.748	1.43455	0.427604	3.35486	0.000794049	0.00349721	1.35733	up
ENSG00000152256	PDK1	294.53	1.40794	0.347204	4.05509	5.0114e-05	0.000313718	1.35702	up
ENSG00000244486	SCARF2	213.182	1.44812	0.465512	3.11081	0.00186578	0.0072786	1.35683	up
ENSG00000114316	USP4	388.617	1.38388	0.256673	5.3916	6.98326e-08	8.6368e-07	1.35631	up
ENSG00000109089	CDR2L	187.133	1.39349	0.311777	4.46951	7.83991e-06	6.02438e-05	1.35477	up
ENSG00000130340	SNX9	237.011	1.38359	0.264724	5.22653	1.7272e-07	1.968e-06	1.35386	up
ENSG00000167986	DDB1	1773.25	1.37208	0.211326	6.49273	8.4295e-11	1.78853e-09	1.35303	up
ENSG00000189079	ARID2	337.245	1.38698	0.282901	4.90269	9.45327e-07	9.14932e-06	1.35281	up
ENSG00000107560	RAB11FIP2	127.256	1.39911	0.344423	4.0622	4.86134e-05	0.000306078	1.35275	up
ENSG00000099821	POLRMT	461.345	1.37658	0.238693	5.76714	8.0626e-09	1.19054e-07	1.35246	up
ENSG00000182749	PAQR7	114.484	1.45141	0.481262	3.01584	0.00256269	0.00956044	1.35243	up
ENSG00000122965	RBM19	193.944	1.44237	0.456947	3.15654	0.00159655	0.00636581	1.35235	up
ENSG00000175087	PDIK1L	120.698	1.47312	0.525197	2.8049	0.00503327	0.0168423	1.35217	up
ENSG00000132842	AP3B1	564.577	1.38437	0.277627	4.98645	6.14983e-07	6.20491e-06	1.35132	up
ENSG00000066629	EML1	106.794	1.40219	0.35417	3.9591	7.52329e-05	0.00044605	1.35063	up
ENSG00000064999	ANKS1A	100.97	1.51333	0.617701	2.44994	0.0142879	0.040006	1.35025	up
ENSG00000139737	SLAIN1	109.088	1.41608	0.395055	3.58452	0.000337702	0.00165585	1.35009	up
ENSG00000065485	PDIA5	198.464	1.39284	0.323767	4.30199	1.69271e-05	0.000119756	1.3498	up
ENSG00000131558	EXOC4	492.945	1.38574	0.291321	4.75675	1.96731e-06	1.76166e-05	1.34969	up
ENSG00000127980	PEX1	185.052	1.4282	0.428677	3.33166	0.000863311	0.0037574	1.34958	up
ENSG00000180953	ST20	31.8811	1.47406	0.543941	2.70997	0.0067289	0.0214395	1.34956	up
ENSG00000215252	GOLGA8B	71.662	1.50553	0.607396	2.47866	0.0131876	0.0374192	1.34937	up
ENSG00000138095	LRPPRC	1861.04	1.3633	0.180476	7.55394	4.22274e-14	1.48366e-12	1.34924	up
ENSG00000164916	FOXK1	249.01	1.36833	0.218087	6.27422	3.51396e-10	6.62588e-09	1.34858	up
ENSG00000136937	NCBP1	566.37	1.38665	0.29884	4.64011	3.48226e-06	2.92472e-05	1.34853	up
ENSG00000078618	NRDC	1707.39	1.36898	0.219969	6.22354	4.86064e-10	8.94145e-09	1.34845	up
ENSG00000165097	KDM1B	165.516	1.41429	0.398778	3.54655	0.00039031	0.00188006	1.34816	up
ENSG00000151693	ASAP2	48.5703	1.51224	0.618428	2.4453	0.0144731	0.0404367	1.34811	up
ENSG00000137502	RAB30	37.1318	1.46269	0.514064	2.84535	0.00443632	0.0151534	1.34631	up
ENSG00000146587	RBAK	151.665	1.50147	0.583537	2.57305	0.0100807	0.0300142	1.3456	up
ENSG00000235688	SNTG2-AS1	37.8524	1.48648	0.577917	2.57213	0.0101075	0.0300693	1.34389	up
ENSG00000144229	THSD7B	56.7588	1.45995	0.53575	2.72506	0.00642898	0.0206525	1.34389	up
ENSG00000164626	KCNK5	80.1063	1.40044	0.379257	3.69259	0.000221983	0.0011504	1.3437	up
ENSG00000175662	TOM1L2	48.9177	1.45003	0.494313	2.93342	0.00335247	0.0119773	1.34356	up
ENSG00000166483	WEE1	494.009	1.39094	0.334639	4.15655	3.23086e-05	0.00021248	1.34331	up
ENSG00000132846	ZBED3	83.7399	1.45904	0.54462	2.67901	0.00738403	0.0231724	1.34331	up
ENSG00000116191	RALGPS2	250.524	1.39781	0.351702	3.97442	7.05516e-05	0.000421958	1.34311	up
ENSG00000165861	ZFYVE1	35.5345	1.51726	0.63315	2.39637	0.0165584	0.0452164	1.34266	up
ENSG00000180182	MED14	227.294	1.47418	0.55362	2.6628	0.00774933	0.0241499	1.34262	up
ENSG00000204256	BRD2	1071.48	1.36497	0.229865	5.93816	2.88233e-09	4.63848e-08	1.34256	up
ENSG00000166033	HTRA1	75.892	1.43444	0.499744	2.87034	0.00410032	0.0141673	1.34243	up
ENSG00000090372	STRN4	537.001	1.38769	0.332681	4.17124	3.02948e-05	0.000201235	1.34146	up
ENSG00000141646	SMAD4	369.506	1.36312	0.229989	5.92689	3.08721e-09	4.92826e-08	1.34111	up
ENSG00000227345	PARG	212.853	1.40521	0.388164	3.62016	0.000294426	0.00146703	1.3407	up
ENSG00000196632	WNK3	87.9188	1.47088	0.54303	2.70866	0.00675564	0.0214965	1.34056	up
ENSG00000101938	CHRDL1	102.208	1.47129	0.571517	2.57436	0.0100425	0.0299291	1.34053	up
ENSG00000169683	LRRC45	257.316	1.41326	0.417975	3.38121	0.000721662	0.00321402	1.34027	up
ENSG00000115548	KDM3A	152.448	1.37391	0.285353	4.81477	1.47373e-06	1.36239e-05	1.34011	up
ENSG00000178163	ZNF518B	199.497	1.38744	0.341542	4.06227	4.85986e-05	0.000306073	1.33758	up
ENSG00000136485	DCAF7	1030.19	1.34719	0.149904	8.98703	2.53999e-19	1.57696e-17	1.33757	up
ENSG00000124181	PLCG1	303.708	1.37914	0.315228	4.37505	1.21405e-05	8.93629e-05	1.33754	up
ENSG00000097007	ABL1	151.244	1.41857	0.441126	3.21578	0.00130089	0.00534893	1.33732	up
ENSG00000080345	RIF1	759.877	1.36309	0.246203	5.53645	3.08659e-08	4.08319e-07	1.33701	up
ENSG00000069248	NUP133	657.655	1.36208	0.241497	5.64013	1.69918e-08	2.36824e-07	1.337	up
ENSG00000064419	TNPO3	409.872	1.36718	0.270974	5.04543	4.52493e-07	4.69205e-06	1.33653	up
ENSG00000196182	STK40	286.466	1.36783	0.274348	4.98575	6.17222e-07	6.22463e-06	1.33603	up
ENSG00000067596	DHX8	289.678	1.36231	0.251544	5.41577	6.10244e-08	7.63381e-07	1.33583	up
ENSG00000143093	STRIP1	219.485	1.39347	0.374787	3.71805	0.00020077	0.0010532	1.33543	up
ENSG00000115318	LOXL3	80.1512	1.4888	0.6048	2.46164	0.0138303	0.0389546	1.33505	up
ENSG00000100426	ZBED4	174.642	1.46343	0.552237	2.65001	0.00804892	0.024921	1.33462	up
ENSG00000261115	TMEM178B	69.143	1.44596	0.516785	2.79798	0.00514229	0.0171598	1.33425	up
ENSG00000140526	ABHD2	478.377	1.38346	0.346593	3.99159	6.56331e-05	0.000396009	1.33304	up
ENSG00000139133	ALG10	44.3856	1.50075	0.637508	2.35408	0.0185686	0.0496208	1.333	up
ENSG00000155016	CYP2U1	81.8997	1.4495	0.52157	2.7791	0.00545094	0.0180547	1.33244	up
ENSG00000163508	EOMES	85.9697	1.40376	0.425441	3.29953	0.000968452	0.00414747	1.33035	up
ENSG00000169857	AVEN	83.0103	1.45027	0.532313	2.72448	0.00644033	0.0206829	1.33018	up
ENSG00000198900	TOP1	1122.73	1.34897	0.212116	6.35957	2.02325e-10	3.9727e-09	1.32976	up
ENSG00000076928	ARHGEF1	241.912	1.38392	0.368578	3.75475	0.000173513	0.000927811	1.3283	up
ENSG00000197122	SRC	124.504	1.42198	0.477787	2.97617	0.00291873	0.0106505	1.32829	up
ENSG00000134532	SOX5	58.1505	1.42648	0.47306	3.01542	0.00256622	0.00957032	1.32811	up
ENSG00000054654	SYNE2	253.68	1.36963	0.313375	4.37059	1.23914e-05	9.09339e-05	1.328	up
ENSG00000054267	ARID4B	529.649	1.36656	0.301455	4.53322	5.80907e-06	4.60971e-05	1.3279	up
ENSG00000250479	CHCHD10	1406.3	1.36933	0.317541	4.3123	1.61565e-05	0.000115048	1.32756	up
ENSG00000133639	BTG1	795.488	1.35745	0.268733	5.05129	4.38827e-07	4.57108e-06	1.32736	up
ENSG00000105953	OGDH	552.546	1.36751	0.309411	4.41974	9.88219e-06	7.43427e-05	1.32715	up
ENSG00000136802	LRRC8A	224.847	1.37628	0.350358	3.92821	8.55813e-05	0.000499144	1.32668	up
ENSG00000109920	FNBP4	494.787	1.36741	0.311614	4.38815	1.14322e-05	8.47484e-05	1.3263	up
ENSG00000046651	OFD1	374.862	1.35543	0.259804	5.2171	1.81742e-07	2.06112e-06	1.32574	up
ENSG00000106397	PLOD3	520.431	1.35504	0.26895	5.03826	4.69794e-07	4.85202e-06	1.32516	up
ENSG00000198265	HELZ	279.05	1.37358	0.340418	4.03497	5.46099e-05	0.000337417	1.32465	up
ENSG00000197386	HTT	340.59	1.36251	0.302415	4.50542	6.62408e-06	5.18305e-05	1.32463	up
ENSG00000160271	RALGDS	90.4837	1.39519	0.42214	3.30504	0.000949617	0.0040796	1.32463	up
ENSG00000134013	LOXL2	72.4199	1.46753	0.593846	2.47123	0.013465	0.0380647	1.32306	up
ENSG00000144579	CTDSP1	603.417	1.34564	0.236302	5.6946	1.23664e-08	1.76638e-07	1.32282	up
ENSG00000166068	SPRED1	144.219	1.365	0.31984	4.26775	1.97454e-05	0.00013725	1.32279	up
ENSG00000197879	MYO1C	451.237	1.3712	0.339594	4.03775	5.39658e-05	0.000334193	1.3224	up
ENSG00000125484	GTF3C4	353.656	1.38254	0.37775	3.65993	0.00025228	0.00128157	1.32234	up
ENSG00000117411	B4GALT2	797.781	1.34476	0.233741	5.75318	8.75778e-09	1.28365e-07	1.32206	up
ENSG00000064607	SUGP2	681.942	1.33983	0.208869	6.41471	1.41091e-10	2.84447e-09	1.32197	up
ENSG00000176182	MYPOP	43.3482	1.42519	0.51314	2.77739	0.0054798	0.0181255	1.32109	up
ENSG00000130177	CDC16	657.631	1.35697	0.293147	4.62897	3.67484e-06	3.0723e-05	1.32102	up
ENSG00000108389	MTMR4	164.644	1.37885	0.376056	3.6666	0.000245793	0.00125483	1.32094	up
ENSG00000171206	TRIM8	204.975	1.38426	0.382549	3.61851	0.0002963	0.00147536	1.3203	up
ENSG00000111300	NAA25	658.533	1.35659	0.295268	4.59445	4.33899e-06	3.55814e-05	1.32004	up
ENSG00000152284	TCF7L1	241.375	1.36456	0.329042	4.14706	3.36765e-05	0.000220481	1.31995	up
ENSG00000182742	HOXB4	144.833	1.42706	0.516798	2.76135	0.00575637	0.0188747	1.3194	up
ENSG00000179361	ARID3B	216.093	1.36427	0.333143	4.09514	4.21906e-05	0.000270074	1.3189	up
ENSG00000197256	KANK2	199.261	1.36742	0.33977	4.02456	5.7082e-05	0.000350807	1.31852	up
ENSG00000065060	UHRF1BP1	450.378	1.35654	0.303256	4.47324	7.70414e-06	5.93257e-05	1.31817	up
ENSG00000215305	VPS16	583.607	1.33544	0.208072	6.41817	1.37926e-10	2.79275e-09	1.31799	up
ENSG00000066027	PPP2R5A	190.377	1.35174	0.280516	4.81878	1.44441e-06	1.33755e-05	1.31746	up
ENSG00000103126	AXIN1	495.266	1.34721	0.272813	4.93823	7.88352e-07	7.76065e-06	1.31699	up
ENSG00000115524	SF3B1	1914.98	1.33925	0.23218	5.76816	8.01432e-09	1.18501e-07	1.31676	up
ENSG00000230522	MBD3L2	97.5631	1.44917	0.429815	3.37161	0.000747294	0.00331467	1.3163	up
ENSG00000136425	CIB2	691.396	1.34949	0.28579	4.72197	2.33566e-06	2.05987e-05	1.31601	up
ENSG00000110651	CD81	2050.23	1.33814	0.233954	5.71968	1.06723e-08	1.53949e-07	1.31558	up
ENSG00000165671	NSD1	367.775	1.3739	0.373795	3.67555	0.000237338	0.00122059	1.3155	up
ENSG00000197217	ENTPD4	151.113	1.40326	0.462173	3.03622	0.00239566	0.00902824	1.31469	up
ENSG00000089876	DHX32	89.0981	1.42614	0.541413	2.63411	0.00843575	0.0258889	1.3145	up
ENSG00000143554	SLC27A3	101.196	1.42216	0.510188	2.78753	0.00531113	0.0176558	1.31341	up
ENSG00000114353	GNAI2	594.276	1.34973	0.298566	4.52071	6.16312e-06	4.85365e-05	1.31289	up
ENSG00000164169	PRMT9	82.4884	1.44692	0.565732	2.55761	0.0105394	0.0311043	1.31289	up
ENSG00000187555	USP7	1720.95	1.3203	0.134838	9.79176	1.22152e-22	1.10768e-20	1.31274	up
ENSG00000164631	ZNF12	173.901	1.382	0.412202	3.35273	0.000800178	0.00352066	1.31227	up
ENSG00000163913	IFT122	143.406	1.34925	0.30089	4.48418	7.3195e-06	5.66432e-05	1.31223	up
ENSG00000185000	DGAT1	273.305	1.36223	0.353751	3.85082	0.000117725	0.000661719	1.31113	up
ENSG00000237424	FOXD2-AS1	118.552	1.3849	0.435569	3.17953	0.00147515	0.00595344	1.31088	up
ENSG00000091409	ITGA6	369.66	1.34443	0.287166	4.68171	2.84497e-06	2.4537e-05	1.3107	up
ENSG00000108604	SMARCD2	515.443	1.33019	0.221462	6.00639	1.89701e-09	3.15504e-08	1.3105	up
ENSG00000228594	FNDC10	179.73	1.37553	0.399925	3.43946	0.000582876	0.0026716	1.31026	up
ENSG00000117593	DARS2	555.433	1.33959	0.26435	5.06751	4.03058e-07	4.23935e-06	1.3101	up
ENSG00000116497	S100PBP	374.523	1.3493	0.312997	4.3109	1.62592e-05	0.000115705	1.30926	up
ENSG00000128709	HOXD9	156.413	1.36066	0.364884	3.72903	0.000192219	0.00101443	1.30876	up
ENSG00000146463	ZMYM4	340.851	1.36078	0.354035	3.84364	0.000121223	0.000677403	1.3086	up
ENSG00000157557	ETS2	202.753	1.34255	0.29561	4.54162	5.58231e-06	4.4524e-05	1.30852	up
ENSG00000085185	BCORL1	174.509	1.3556	0.341214	3.97288	7.10097e-05	0.000424465	1.30824	up
ENSG00000147894	C9orf72	107.498	1.44656	0.594846	2.43182	0.0150233	0.0417019	1.30775	up
ENSG00000121774	KHDRBS1	3423.35	1.32175	0.186902	7.0719	1.52829e-12	4.2331e-11	1.30727	up
ENSG00000185115	NSMCE3	197.775	1.33817	0.277851	4.81613	1.46369e-06	1.35368e-05	1.30676	up
ENSG00000164114	MAP9	419.032	1.34497	0.291668	4.61131	4.00132e-06	3.3123e-05	1.3064	up
ENSG00000108821	COL1A1	103.838	1.37567	0.411761	3.34095	0.000834925	0.00365002	1.3057	up
ENSG00000161013	MGAT4B	332.933	1.37518	0.415622	3.30873	0.000937205	0.004035	1.30566	up
ENSG00000034677	RNF19A	97.0289	1.39059	0.459247	3.02797	0.00246199	0.0092352	1.30564	up
ENSG00000091986	CCDC80	162.984	1.44442	0.527059	2.74053	0.00613402	0.0198832	1.30543	up
ENSG00000124145	SDC4	214.32	1.35828	0.361582	3.75649	0.000172313	0.00092365	1.3052	up
ENSG00000169710	FASN	1170.33	1.35636	0.354923	3.82156	0.00013261	0.000734802	1.30442	up
ENSG00000143061	IGSF3	335.365	1.35969	0.368987	3.68492	0.000228778	0.00118169	1.30431	up
ENSG00000186187	ZNRF1	204.381	1.33529	0.283924	4.70296	2.56412e-06	2.24031e-05	1.30296	up
ENSG00000206557	TRIM71	243.562	1.33985	0.288018	4.65196	3.2879e-06	2.78072e-05	1.30239	up
ENSG00000103197	TSC2	194.699	1.38663	0.453099	3.06032	0.00221097	0.00841494	1.30231	up
ENSG00000012983	MAP4K5	300.992	1.34087	0.30667	4.37235	1.22915e-05	9.03226e-05	1.30213	up
ENSG00000114573	ATP6V1A	738.209	1.32734	0.248135	5.34928	8.83054e-08	1.06797e-06	1.30172	up
ENSG00000170293	CMTM8	237.742	1.33932	0.305523	4.3837	1.16681e-05	8.62927e-05	1.30168	up
ENSG00000157353	FCSK	79.1944	1.42135	0.555471	2.55882	0.0105029	0.0310092	1.30132	up
ENSG00000013503	POLR3B	215.765	1.37323	0.420949	3.26222	0.00110542	0.00465021	1.30002	up
ENSG00000104140	RHOV	122.9	1.32714	0.273733	4.84832	1.2451e-06	1.17337e-05	1.29998	up
ENSG00000136720	HS6ST1	93.1629	1.35859	0.390348	3.48045	0.000500579	0.00233753	1.29996	up
ENSG00000150712	MTMR12	254.767	1.33169	0.27977	4.75996	1.93634e-06	1.73785e-05	1.29959	up
ENSG00000150907	FOXO1	74.4813	1.37978	0.465336	2.96513	0.00302556	0.0109835	1.29931	up
ENSG00000160767	FAM189B	558.706	1.31607	0.204769	6.42709	1.30073e-10	2.65416e-09	1.29881	up
ENSG00000110713	NUP98	503.866	1.33832	0.310583	4.30906	1.63953e-05	0.000116597	1.29811	up
ENSG00000102081	FMR1	282.46	1.3958	0.488506	2.85729	0.0042728	0.0146728	1.29666	up
ENSG00000132361	CLUH	557.768	1.35721	0.382701	3.5464	0.000390536	0.00188074	1.29638	up
ENSG00000127616	SMARCA4	3484.75	1.31495	0.214361	6.13427	8.55534e-10	1.50538e-08	1.29617	up
ENSG00000118939	UCHL3	146.217	1.37326	0.437538	3.13861	0.00169748	0.00672259	1.29605	up
ENSG00000105948	TTC26	182.786	1.35535	0.389921	3.47596	0.000509033	0.0023679	1.29462	up
ENSG00000013573	DDX11	162.75	1.33899	0.334791	3.99946	6.34862e-05	0.000384755	1.29402	up
ENSG00000182580	EPHB3	79.5868	1.39354	0.499289	2.79106	0.00525363	0.017494	1.29368	up
ENSG00000174282	ZBTB4	38.0078	1.46105	0.602039	2.42684	0.015231	0.0421766	1.29361	up
ENSG00000131094	C1QL1	294.85	1.32892	0.298797	4.44755	8.68542e-06	6.59983e-05	1.29355	up
ENSG00000111877	MCM9	72.8778	1.42265	0.569385	2.49858	0.0124692	0.0357005	1.29345	up
ENSG00000213614	HEXA	678.405	1.31247	0.220248	5.95903	2.53735e-09	4.13198e-08	1.29325	up
ENSG00000278311	GGNBP2	1013.35	1.3187	0.253927	5.19321	2.06694e-07	2.31526e-06	1.29244	up
ENSG00000174307	PHLDA3	143.013	1.39428	0.4952	2.8156	0.00486868	0.0163768	1.29222	up
ENSG00000159692	CTBP1	543.878	1.33207	0.313299	4.25176	2.121e-05	0.000145992	1.29206	up
ENSG00000070159	PTPN3	92.6779	1.36176	0.423366	3.2165	0.00129763	0.00533954	1.29184	up
ENSG00000062370	ZNF112	44.6084	1.39832	0.511663	2.7329	0.00627799	0.0202647	1.29078	up
ENSG00000116731	PRDM2	284.829	1.37073	0.438039	3.12923	0.00175262	0.00690869	1.29066	up
ENSG00000150961	SEC24D	106.435	1.40125	0.526336	2.66227	0.00776148	0.0241795	1.29059	up
ENSG00000162430	SELENON	358.461	1.30656	0.204208	6.3982	1.57216e-10	3.15211e-09	1.29035	up
ENSG00000116539	ASH1L	290.779	1.33195	0.314677	4.23274	2.30866e-05	0.000157577	1.28954	up
ENSG00000198707	CEP290	481.212	1.32471	0.286038	4.63124	3.63489e-06	3.04123e-05	1.28941	up
ENSG00000124766	SOX4	2340.84	1.31823	0.270487	4.87355	1.09609e-06	1.04786e-05	1.2888	up
ENSG00000168566	SNRNP48	420.07	1.34579	0.377463	3.56536	0.000363363	0.0017638	1.28828	up
ENSG00000061273	HDAC7	202.801	1.33501	0.338812	3.94026	8.13924e-05	0.000477645	1.28828	up
ENSG00000139990	DCAF5	247.278	1.37733	0.467472	2.94635	0.00321551	0.0115522	1.28818	up
ENSG00000105576	TNPO2	400.993	1.31103	0.242009	5.41729	6.05086e-08	7.59102e-07	1.28764	up
ENSG00000138658	ZGRF1	152.635	1.35571	0.404119	3.35472	0.000794447	0.00349826	1.28752	up
ENSG00000158856	DMTN	85.5056	1.32976	0.334278	3.97801	6.94937e-05	0.000416087	1.28734	up
ENSG00000204590	GNL1	733.978	1.33014	0.32624	4.07717	4.55876e-05	0.000289012	1.28687	up
ENSG00000039560	RAI14	774.061	1.34716	0.381619	3.53011	0.000415393	0.0019847	1.28666	up
ENSG00000006194	ZNF263	152.873	1.34272	0.379341	3.53961	0.000400711	0.0019238	1.2866	up
ENSG00000168944	CEP120	123.142	1.38719	0.5043	2.75073	0.00594634	0.0194044	1.28647	up
ENSG00000078403	MLLT10	413.249	1.30292	0.200501	6.49829	8.1238e-11	1.72702e-09	1.28641	up
ENSG00000119314	PTBP3	561.937	1.30376	0.212167	6.14495	7.99865e-10	1.41885e-08	1.28565	up
ENSG00000159842	ABR	166.907	1.38202	0.483614	2.85768	0.0042675	0.0146592	1.28551	up
ENSG00000233966	UBE2SP1	363.611	1.37022	0.458968	2.98545	0.00283162	0.0103864	1.28526	up
ENSG00000071051	NCK2	197.123	1.3165	0.286226	4.59951	4.23479e-06	3.48576e-05	1.28523	up
ENSG00000084463	WBP11	973.094	1.32494	0.311506	4.25334	2.10603e-05	0.000145098	1.28516	up
ENSG00000133302	SLF1	260.619	1.31608	0.27051	4.86518	1.14355e-06	1.08989e-05	1.285	up
ENSG00000181523	SGSH	171.806	1.35886	0.431156	3.15166	0.00162348	0.00645903	1.28467	up
ENSG00000109606	DHX15	1312.12	1.30404	0.218384	5.97132	2.35336e-09	3.86404e-08	1.28461	up
ENSG00000182670	TTC3	2378.98	1.31509	0.269965	4.87135	1.10838e-06	1.05836e-05	1.2844	up
ENSG00000112414	ADGRG6	99.4353	1.3315	0.342029	3.89295	9.90343e-05	0.00056761	1.28254	up
ENSG00000137216	TMEM63B	152.154	1.35049	0.418311	3.22843	0.00124471	0.00515482	1.28251	up
ENSG00000179833	SERTAD2	169.645	1.37639	0.483949	2.84409	0.00445384	0.015199	1.28213	up
ENSG00000131375	CAPN7	203.701	1.35441	0.423203	3.20038	0.00137245	0.0055956	1.28162	up
ENSG00000212694	LINC01089	118.602	1.37971	0.497829	2.77145	0.00558075	0.0184064	1.2811	up
ENSG00000162889	MAPKAPK2	437.126	1.31711	0.298624	4.41058	1.03094e-05	7.72906e-05	1.28068	up
ENSG00000147854	UHRF2	132.429	1.34085	0.381797	3.51194	0.000444853	0.00210886	1.2806	up
ENSG00000108001	EBF3	118.74	1.36024	0.46097	2.95083	0.00316922	0.0114102	1.28013	up
ENSG00000188807	TMEM201	260.735	1.36448	0.463865	2.94154	0.00326586	0.0117061	1.27969	up
ENSG00000130158	DOCK6	151.373	1.38546	0.507991	2.72733	0.00638493	0.0205499	1.27928	up
ENSG00000073578	SDHA	563.404	1.30223	0.240684	5.41054	6.28356e-08	7.84691e-07	1.27923	up
ENSG00000141577	CEP131	310.624	1.34475	0.408164	3.29464	0.000985465	0.00420961	1.27896	up
ENSG00000198420	TCAF1	270.283	1.33082	0.33726	3.94598	7.94741e-05	0.000467517	1.27889	up
ENSG00000143862	ARL8A	115.186	1.362	0.462476	2.94501	0.00322944	0.0115908	1.27872	up
ENSG00000126883	NUP214	209.76	1.33138	0.362928	3.66843	0.000244043	0.00124902	1.27832	up
ENSG00000183808	RBM12B	88.3609	1.32754	0.347273	3.82277	0.000131961	0.000732137	1.27823	up
ENSG00000111880	RNGTT	225.183	1.33559	0.377585	3.53719	0.000404401	0.00193726	1.27814	up
ENSG00000182606	TRAK1	275.859	1.30702	0.275203	4.74929	2.04131e-06	1.82308e-05	1.27737	up
ENSG00000071564	TCF3	1377.1	1.30683	0.270966	4.82284	1.4153e-06	1.31171e-05	1.27714	up
ENSG00000068654	POLR1A	351.615	1.35863	0.44968	3.02133	0.00251668	0.00941291	1.2767	up
ENSG00000166016	ABTB2	52.6157	1.38515	0.542256	2.55441	0.0106368	0.0313433	1.27666	up
ENSG00000178921	PFAS	559.417	1.30684	0.273494	4.77832	1.76765e-06	1.60424e-05	1.27618	up
ENSG00000142784	WDTC1	94.6707	1.3573	0.454657	2.98532	0.00283282	0.0103891	1.27596	up
ENSG00000135842	NIBAN1	168.468	1.32909	0.365769	3.63368	0.000279405	0.00140016	1.27593	up
ENSG00000153914	SREK1	451.177	1.30946	0.290479	4.50793	6.54622e-06	5.13131e-05	1.27558	up
ENSG00000108175	ZMIZ1	224.44	1.32037	0.328836	4.01529	5.93724e-05	0.000362741	1.27516	up
ENSG00000084093	REST	257.007	1.32434	0.347836	3.80737	0.000140452	0.00077238	1.27469	up
ENSG00000101596	SMCHD1	418.889	1.31493	0.312171	4.2122	2.5289e-05	0.000170576	1.27448	up
ENSG00000161202	DVL3	198.116	1.32579	0.363588	3.64641	0.000265931	0.00134343	1.27447	up
ENSG00000132932	ATP8A2	93.9356	1.34248	0.42594	3.15181	0.00162263	0.00645802	1.274	up
ENSG00000173517	PEAK1	173.763	1.3633	0.475104	2.86949	0.00411138	0.0141899	1.27366	up
ENSG00000157404	KIT	64.7826	1.37414	0.507222	2.70916	0.00674548	0.0214735	1.27344	up
ENSG00000143569	UBAP2L	528.648	1.30671	0.286607	4.55925	5.1337e-06	4.13839e-05	1.27323	up
ENSG00000158863	FHIP2B	144.582	1.31841	0.345443	3.81656	0.000135323	0.000747373	1.27302	up
ENSG00000185813	PCYT2	168.261	1.31636	0.330566	3.98215	6.82956e-05	0.000409698	1.27279	up
ENSG00000254764	TRIM53CP	235.455	1.39153	0.448724	3.10109	0.00192811	0.00748036	1.2717	up
ENSG00000102974	CTCF	609.651	1.30073	0.273279	4.75973	1.93853e-06	1.7391e-05	1.27073	up
ENSG00000183688	RFLNB	329.717	1.30128	0.27689	4.69962	2.60646e-06	2.27401e-05	1.2702	up
ENSG00000185112	FAM43A	79.7602	1.37961	0.540856	2.55079	0.010748	0.0315922	1.2701	up
ENSG00000164134	NAA15	1068.4	1.29194	0.230727	5.59942	2.15065e-08	2.93752e-07	1.27001	up
ENSG00000135097	MSI1	465.079	1.30386	0.296915	4.39134	1.12655e-05	8.37706e-05	1.2692	up
ENSG00000173706	HEG1	166.946	1.32626	0.383721	3.4563	0.000547642	0.0025292	1.26908	up
ENSG00000119772	DNMT3A	637.894	1.29988	0.277891	4.67765	2.90177e-06	2.49666e-05	1.26878	up
ENSG00000105325	FZR1	362.695	1.31495	0.341104	3.85499	0.000115733	0.000651698	1.26846	up
ENSG00000107130	NCS1	332.803	1.29833	0.276997	4.68715	2.77036e-06	2.40062e-05	1.26813	up
ENSG00000123094	RASSF8	91.8969	1.38497	0.534238	2.59242	0.00953037	0.0286488	1.26766	up
ENSG00000107341	UBE2R2	2091.72	1.2872	0.226748	5.67681	1.37231e-08	1.9449e-07	1.26601	up
ENSG00000089902	RCOR1	162.717	1.33391	0.414903	3.21498	0.00130453	0.00536177	1.26549	up
ENSG00000110395	CBL	232.26	1.31784	0.361656	3.6439	0.000268539	0.00135441	1.26544	up
ENSG00000129315	CCNT1	201.99	1.35966	0.480992	2.82678	0.00470191	0.0158941	1.26537	up
ENSG00000168924	LETM1	1016.48	1.28981	0.247406	5.21334	1.85475e-07	2.10019e-06	1.26537	up
ENSG00000112874	NUDT12	110.383	1.30209	0.313405	4.15465	3.25784e-05	0.000214062	1.26432	up
ENSG00000164292	RHOBTB3	584.334	1.29892	0.291615	4.45422	8.41972e-06	6.42474e-05	1.26403	up
ENSG00000175984	DENND2C	42.5189	1.36195	0.470512	2.8946	0.00379641	0.0132747	1.26394	up
ENSG00000179364	PACS2	236.734	1.33449	0.430158	3.10232	0.00192008	0.00745318	1.263	up
ENSG00000134853	PDGFRA	86.0979	1.39134	0.579211	2.40214	0.0162996	0.0446491	1.26273	up
ENSG00000123989	CHPF	249.349	1.36325	0.506513	2.69144	0.00711448	0.0224627	1.26267	up
ENSG00000214022	REPIN1	539.765	1.29461	0.285157	4.53998	5.62597e-06	4.48559e-05	1.26221	up
ENSG00000163624	CDS1	113.815	1.3104	0.355939	3.68153	0.000231834	0.00119465	1.26213	up
ENSG00000204569	PPP1R10	360.749	1.28658	0.250241	5.14135	2.72771e-07	2.97017e-06	1.26208	up
ENSG00000138448	ITGAV	274.82	1.29308	0.282467	4.57781	4.69875e-06	3.81328e-05	1.26159	up
ENSG00000170915	PAQR8	91.9429	1.32623	0.404188	3.28123	0.00103356	0.00439103	1.26157	up
ENSG00000265817	FSBP	95.944	1.38146	0.545812	2.53102	0.0113731	0.0331006	1.26148	up
ENSG00000138180	CEP55	514.011	1.29568	0.291581	4.44362	8.84558e-06	6.70754e-05	1.26126	up
ENSG00000184792	OSBP2	57.0236	1.38459	0.56809	2.43727	0.0147985	0.0411879	1.26121	up
ENSG00000177679	SRRM3	254.986	1.33113	0.428976	3.10303	0.00191547	0.00743926	1.26071	up
ENSG00000170365	SMAD1	333.56	1.28985	0.273953	4.70829	2.49804e-06	2.18719e-05	1.26068	up
ENSG00000174516	PELI3	99.7405	1.33714	0.453053	2.9514	0.00316335	0.011391	1.26045	up
ENSG00000257923	CUX1	422.633	1.30283	0.328562	3.96524	7.33222e-05	0.000436023	1.26034	up
ENSG00000100867	DHRS2	236.216	1.33274	0.425924	3.12906	0.00175368	0.00691162	1.26026	up
ENSG00000023902	PLEKHO1	348.515	1.29715	0.308299	4.20743	2.58287e-05	0.000174055	1.2599	up
ENSG00000165802	NSMF	539.366	1.31374	0.371269	3.5385	0.000402404	0.00193066	1.25943	up
ENSG00000146909	NOM1	223.811	1.32288	0.403946	3.27489	0.00105702	0.0044759	1.25938	up
ENSG00000107929	LARP4B	521.738	1.29235	0.288408	4.48099	7.42984e-06	5.74564e-05	1.2592	up
ENSG00000177873	ZNF619	26.4091	1.36882	0.566829	2.41487	0.015741	0.0433745	1.25826	up
ENSG00000127586	CHTF18	209.082	1.30448	0.349137	3.73629	0.000186759	0.000988238	1.25822	up
ENSG00000134313	KIDINS220	480.596	1.30182	0.336064	3.87374	0.000107177	0.000607645	1.25681	up
ENSG00000162722	TRIM58	194.902	1.29422	0.30565	4.23431	2.29253e-05	0.000156566	1.25658	up
ENSG00000037749	MFAP3	158.981	1.32673	0.423607	3.13198	0.00173631	0.00685088	1.25634	up
ENSG00000082068	WDR70	398.882	1.28568	0.276049	4.65742	3.20194e-06	2.71222e-05	1.25568	up
ENSG00000167930	FAM234A	403.564	1.27771	0.240385	5.31529	1.06489e-07	1.26755e-06	1.25548	up
ENSG00000238227	TMEM250	281.859	1.29786	0.330044	3.93239	8.4106e-05	0.000490933	1.25539	up
ENSG00000152443	ZNF776	78.8648	1.38416	0.561392	2.46558	0.013679	0.038598	1.25464	up
ENSG00000068650	ATP11A	165.663	1.38177	0.567865	2.43328	0.0149629	0.0415606	1.25449	up
ENSG00000100364	KIAA0930	295.731	1.27776	0.245965	5.19489	2.04837e-07	2.29682e-06	1.25446	up
ENSG00000005007	UPF1	515.949	1.32136	0.411693	3.20956	0.00132938	0.00544458	1.25416	up
ENSG00000066923	STAG3	41.9556	1.38188	0.578301	2.38955	0.0168692	0.0459033	1.25304	up
ENSG00000040608	RTN4R	177.835	1.33835	0.473166	2.8285	0.00467671	0.015831	1.25222	up
ENSG00000165458	INPPL1	429.11	1.27195	0.226348	5.61946	1.91556e-08	2.63619e-07	1.25219	up
ENSG00000110318	CEP126	179.935	1.37152	0.537473	2.55179	0.010717	0.0315203	1.25194	up
ENSG00000198887	SMC5	295.942	1.274	0.231447	5.5045	3.70225e-08	4.81601e-07	1.25193	up
ENSG00000084731	KIF3C	177.709	1.36209	0.527861	2.58039	0.00986884	0.0294918	1.25187	up
ENSG00000116604	MEF2D	75.1224	1.31129	0.403173	3.25243	0.00114422	0.00478854	1.25132	up
ENSG00000140006	WDR89	169.454	1.2964	0.341037	3.80136	0.000143906	0.000788594	1.25098	up
ENSG00000114779	ABHD14B	656.591	1.28229	0.281498	4.55525	5.23227e-06	4.20854e-05	1.25094	up
ENSG00000163935	SFMBT1	206.287	1.30197	0.362804	3.58861	0.000332441	0.00163299	1.25086	up
ENSG00000110075	PPP6R3	677.143	1.31487	0.4064	3.2354	0.00121471	0.00505064	1.24941	up
ENSG00000006459	KDM7A	156.418	1.29281	0.33628	3.84446	0.000120819	0.000675807	1.24938	up
ENSG00000170017	ALCAM	531.096	1.29043	0.319722	4.03609	5.43495e-05	0.000336094	1.24924	up
ENSG00000118407	FILIP1	63.5331	1.33159	0.426095	3.12511	0.00177736	0.00699106	1.24922	up
ENSG00000158169	FANCC	332.592	1.29611	0.349607	3.70734	0.000209448	0.00109557	1.24873	up
ENSG00000152377	SPOCK1	82.9463	1.30488	0.405677	3.21655	0.00129743	0.00533954	1.24841	up
ENSG00000168827	GFM1	524.713	1.29878	0.356348	3.6447	0.000267701	0.0013509	1.2482	up
ENSG00000139218	SCAF11	1080.31	1.263	0.195316	6.46645	1.00333e-10	2.08429e-09	1.24773	up
ENSG00000087269	NOP14	253.835	1.28553	0.309022	4.16	3.18247e-05	0.000209755	1.24725	up
ENSG00000058453	CROCC	114.066	1.35213	0.524018	2.58031	0.00987118	0.0294948	1.24722	up
ENSG00000264538	SUZ12P1	183.59	1.30639	0.390672	3.34396	0.000825909	0.00362002	1.24697	up
ENSG00000214357	NEURL1B	43.0443	1.32546	0.457969	2.89421	0.00380116	0.0132871	1.24683	up
ENSG00000138593	SECISBP2L	111.989	1.30895	0.390472	3.35223	0.00080162	0.00352558	1.24675	up
ENSG00000120278	PLEKHG1	177.062	1.30927	0.386532	3.38723	0.000706024	0.00315466	1.24629	up
ENSG00000107938	EDRF1	83.5323	1.32389	0.461037	2.87154	0.00408477	0.0141203	1.24604	up
ENSG00000179409	GEMIN4	393.648	1.27343	0.262336	4.85418	1.20885e-06	1.14464e-05	1.24583	up
ENSG00000182568	SATB1	249.146	1.27463	0.272325	4.68054	2.86126e-06	2.46472e-05	1.24569	up
ENSG00000100523	DDHD1	137.217	1.29727	0.369628	3.50965	0.000448698	0.0021234	1.24551	up
ENSG00000183495	EP400	297.016	1.27252	0.263737	4.82497	1.40025e-06	1.30218e-05	1.24547	up
ENSG00000224699	LAMTOR5-AS1	50.8407	1.36036	0.569128	2.39025	0.0168368	0.0458392	1.24512	up
ENSG00000168710	AHCYL1	1200.91	1.26011	0.197851	6.36899	1.90279e-10	3.74966e-09	1.24488	up
ENSG00000133019	CHRM3	159.429	1.32061	0.440852	2.99558	0.00273922	0.0101035	1.24395	up
ENSG00000164638	SLC29A4	169.452	1.30588	0.405283	3.22214	0.00127238	0.0052475	1.24384	up
ENSG00000145349	CAMK2D	405.807	1.27607	0.285179	4.47462	7.6549e-06	5.90505e-05	1.24367	up
ENSG00000102910	LONP2	405.958	1.32694	0.460573	2.88106	0.00396342	0.0137509	1.24337	up
ENSG00000173801	JUP	310.201	1.29058	0.348431	3.70398	0.000212246	0.00110808	1.2429	up
ENSG00000107771	CCSER2	195.954	1.32561	0.447469	2.96245	0.00305199	0.0110574	1.24262	up
[truncated: 6,193 more rows]

## Sheet: DNMT1_KO_vs_DNMT1_L1TD1_dKO_res
	baseMean	log2FoldChange	lfcSE	stat	pvalue	padj	shrunken.LFC	geneName
ENSG00000129204	13.6509	13.7748	3.20852	14.3844	0.00014903	0.00348427	0.361597	USP6
ENSG00000288945	8.59061	11.4907	2.76905	16.1145	5.96265e-05	0.00173591	13.2085
ENSG00000196119	23.1294	11.0664	1.97807	30.4007	3.5141e-08	3.4662e-06	11.6679	OR8A1
ENSG00000236824	11248.5	10.9734	1.54422	34.4217	4.43745e-09	5.63954e-07	10.4922	BCYRN1
ENSG00000287059	5.05561	10.9311	3.34689	9.88831	0.00166332	0.0212745	0.30744
ENSG00000237973	12669.4	10.5526	1.87291	22.2042	2.45133e-06	0.000127895	9.74186	MTCO1P12
ENSG00000285458	39.0212	10.3047	1.33806	99.1357	2.35781e-23	4.24962e-20	11.1838
ENSG00000251364	8.97995	10.0131	1.94424	26.1197	3.20888e-07	2.40073e-05	10.4156
ENSG00000264956	55.5668	10.0061	1.34563	88.1391	6.10103e-21	1.00799e-17	10.8313
ENSG00000176049	7.4001	9.99262	2.55781	14.1366	0.000170002	0.00381234	9.73159	JAKMIP2
ENSG00000272518	11.9808	9.9846	2.241	18.4377	1.75552e-05	0.000627115	8.77929
ENSG00000289304	49.9548	9.97288	1.38335	75.2174	4.21643e-18	4.00218e-15	10.7724
ENSG00000036530	6.57918	9.85433	2.08532	22.5425	2.0554e-06	0.000112521	10.1276	CYP46A1
ENSG00000258733	6.19529	9.84587	2.33557	16.8105	4.13044e-05	0.0012872	9.7834	LINC02328
ENSG00000196074	26.4127	9.84564	1.5923	43.0511	5.33278e-11	1.10133e-08	10.5261	SYCP2
ENSG00000272425	2.98595	9.80652	3.35394	8.40941	0.00373285	0.0373399	0.292857
ENSG00000243071	2357.84	9.78943	2.05635	16.3652	5.22354e-05	0.00156202	8.75151
ENSG00000267892	19.1092	9.74366	1.79516	29.3838	5.93718e-08	5.55238e-06	10.2394
ENSG00000251468	4.75197	9.7352	2.95842	9.96954	0.00159151	0.0206231	0.407133
ENSG00000241316	42.7885	9.7187	1.49947	57.2922	3.75641e-14	1.48949e-11	9.24963	SUCLG2-AS1
ENSG00000203952	22.3326	9.69411	1.49687	51.2672	8.06117e-13	2.55926e-10	10.4003	CCDC160
ENSG00000253363	21.3976	9.68607	1.45378	57.4501	3.46657e-14	1.43184e-11	10.4019
ENSG00000247137	44.3012	9.65268	1.46032	54.9076	1.2633e-13	4.63817e-11	10.3593	ANKRD42-DT
ENSG00000270388	8.05224	9.61996	2.55065	12.7472	0.00035655	0.00691003	0.682628	MTCO3P22
ENSG00000185177	3.33064	9.61297	3.2766	7.9105	0.00491488	0.045338	0.301361	ZNF479
ENSG00000269421	3.4856	9.5603	3.02898	9.47662	0.00208108	0.0248252	0.394556
ENSG00000288107	7.28908	9.48641	1.84578	27.4838	1.58418e-07	1.33084e-05	9.87529
ENSG00000287530	375.896	9.41348	1.27482	108.772	1.82052e-25	6.01562e-22	10.2144
ENSG00000188693	41.9454	9.41106	1.47925	49.3197	2.17471e-12	6.24868e-10	10.0573	CYP51A1-AS1
ENSG00000286760	28.3229	9.39824	1.48275	49.1012	2.43086e-12	6.88488e-10	10.0694
ENSG00000261046	5.79072	9.38354	2.68898	11.1175	0.000855176	0.0131636	0.522201	C2orf69P1
ENSG00000272663	10.3812	9.37806	2.07807	19.0355	1.28306e-05	0.000487319	9.49775	PPP1R21-DT
ENSG00000166510	25.6597	9.35723	1.44552	54.0694	1.93528e-13	6.61533e-11	10.0362	CCDC68
ENSG00000272356	13.5683	9.27136	1.70048	31.1295	2.41369e-08	2.53195e-06	9.75078
ENSG00000131969	5.76376	9.26577	2.25154	16.7198	4.33257e-05	0.00132763	9.20577	ABHD12B
ENSG00000135248	8.51277	9.26461	1.82924	26.3545	2.84154e-07	2.19208e-05	9.64297	FAM71F1
ENSG00000257800	9.45408	9.1711	2.04019	19.5797	9.64898e-06	0.000388034	9.31971	FNBP1P1
ENSG00000259804	18.752	9.15611	1.50095	44.8428	2.13507e-11	4.86551e-09	9.76426	CTCF-DT
ENSG00000257159	5.72908	9.07095	3.13791	7.95379	0.00479868	0.0445406	0.29362
ENSG00000118690	30.9435	9.03808	1.44658	49.6369	1.85e-12	5.55728e-10	9.65911	ARMC2
ENSG00000173930	19.3343	9.01847	1.5766	37.1426	1.098e-09	1.67454e-07	9.5781	SLCO4C1
ENSG00000112232	20.1062	8.99385	1.70879	28.4278	9.72571e-08	8.64673e-06	9.39003	KHDRBS2
ENSG00000170703	7.88054	8.9923	2.00271	19.5198	9.95633e-06	0.000397972	9.11263	TTLL6
ENSG00000233571	9.75864	8.98778	2.04237	18.4171	1.77455e-05	0.000630505	9.0634
ENSG00000227470	8.84941	8.9602	2.05437	18.719	1.51463e-05	0.000552993	9.05429	RPL39P16
ENSG00000288728	57.7226	8.92596	1.39698	55.5839	8.95535e-14	3.34998e-11	9.5465
ENSG00000240423	4.38015	8.9242	2.20377	16.3815	5.1789e-05	0.00155101	8.80454	LINC00636
ENSG00000277112	5.0037	8.91395	2.48887	12.7164	0.000362466	0.00694995	8.3946	ANKRD20A21P
ENSG00000198744	354.288	8.85936	1.41135	30.6289	3.12398e-08	3.14396e-06	8.35769	MTCO3P12
ENSG00000264964	22.3196	8.84208	1.52536	39.0298	4.1738e-10	7.01268e-08	9.37207	TWSG1-DT
ENSG00000260317	11.444	8.83845	1.96733	20.1411	7.19345e-06	0.000309365	9.00255
ENSG00000214184	47.1125	8.8323	1.40182	53.5593	2.50909e-13	8.29088e-11	9.43131	GCC2-AS1
ENSG00000273226	12.5691	8.82975	1.80005	24.4626	7.5766e-07	5.01195e-05	9.1458
ENSG00000154479	50.9817	8.8237	1.37621	54.4379	1.60441e-13	5.68019e-11	8.38321	CCDC173
ENSG00000224897	11.6625	8.8018	1.88033	21.6274	3.31096e-06	0.000161682	9.02348	POT1-AS1
ENSG00000272791	7.52861	8.73469	1.95016	19.7671	8.74756e-06	0.000357586	8.85702
ENSG00000163491	15.5545	8.69772	1.5516	35.9256	2.04996e-09	2.85186e-07	9.18316	NEK10
ENSG00000272461	5.48632	8.69664	2.30971	13.9939	0.000183402	0.00401338	8.37667
ENSG00000257242	2.92343	8.67913	3.05243	7.83998	0.00511033	0.0464332	0.361032	LINC01619
ENSG00000245468	19.4459	8.63555	1.53301	36.6304	1.42784e-09	2.0815e-07	9.11286	LINC02447
ENSG00000289586	21.8552	8.63034	1.46114	43.294	4.71036e-11	9.93486e-09	9.17571
ENSG00000269846	11.785	8.61871	1.61667	31.2339	2.28731e-08	2.42504e-06	9.04145
ENSG00000261121	17.6548	8.61442	2.04874	16.7546	4.25392e-05	0.00131164	8.58958	LINC02473
ENSG00000253394	4.9907	8.56948	2.42368	12.0104	0.000529052	0.00921704	7.99183	LINC00534
ENSG00000286152	4.43904	8.56612	2.98705	7.97787	0.00473527	0.044138	0.389595
ENSG00000280193	8.41835	8.5595	2.36923	12.2338	0.000469315	0.00850515	8.05955
ENSG00000146233	27.3656	8.5589	1.37876	54.104	1.9015e-13	6.61387e-11	9.13863	CYP39A1
ENSG00000290015	19.3049	8.55803	1.49301	39.3488	3.54477e-10	6.1648e-08	9.05631	NA
ENSG00000212127	9.32117	8.55746	2.11853	15.7897	7.07852e-05	0.0019878	8.45048	TAS2R14
ENSG00000230383	6728.54	8.53901	1.47276	25.7184	3.95035e-07	2.8794e-05	7.96106
ENSG00000137561	23.017	8.53274	2.0018	17.1787	3.40223e-05	0.0010897	8.50295	TTPA
ENSG00000183578	17.87	8.5323	1.8467	20.9345	4.75257e-06	0.000219637	8.6934	TNFAIP8L3
ENSG00000197608	17.7547	8.52187	1.67827	27.0275	2.00578e-07	1.60998e-05	8.8648	ZNF841
ENSG00000260942	41.3834	8.51725	1.5669	32.7237	1.06234e-08	1.20354e-06	8.93416	CAPN10-DT
ENSG00000260711	10.7608	8.51459	2.39003	11.9004	0.000561229	0.00958392	7.97072
ENSG00000230091	51.319	8.51192	1.43014	43.5534	4.12556e-11	8.89058e-09	9.09214	TMEM254-AS1
ENSG00000279696	6.0631	8.50768	2.80744	8.56353	0.00342963	0.0352462	0.400532
ENSG00000232594	6.22691	8.47162	2.11661	15.9303	6.57187e-05	0.00186401	7.17134
ENSG00000246596	10.7911	8.45879	1.91186	19.2036	1.17492e-05	0.000452311	8.55325
ENSG00000226310	3.86529	8.45403	2.52325	10.8533	0.000986217	0.0146321	0.689065
ENSG00000288868	24.8388	8.45152	1.7089	25.106	5.42651e-07	3.81676e-05	8.73625
ENSG00000253764	9.21961	8.39774	1.91071	19.0233	1.29134e-05	0.000488589	8.45085	KBTBD11-AS1
ENSG00000274825	12.3837	8.39071	1.97974	17.2724	3.2385e-05	0.00104571	8.37046
ENSG00000261758	6.78703	8.37987	2.64929	9.26606	0.0023344	0.0268767	0.463597	STAG1-DT
ENSG00000238058	12.2015	8.37088	1.97287	17.3805	3.05948e-05	0.000997654	8.3608
ENSG00000183111	7.60457	8.36912	1.87355	20.0749	7.44696e-06	0.000318197	8.49486	ARHGEF37
ENSG00000213139	5.57473	8.34154	2.20417	14.2751	0.000157938	0.00364103	6.89342	CRYGS
ENSG00000289293	3.73347	8.32204	2.75748	8.80481	0.00300437	0.032145	0.445327
ENSG00000186479	7.67305	8.31606	1.87565	19.9125	8.10694e-06	0.000336251	8.43293	RGS7BP
ENSG00000289074	40.2859	8.30623	1.49473	36.3409	1.65651e-09	2.36318e-07	8.73921
ENSG00000184261	6.03691	8.29349	1.8507	20.6146	5.61671e-06	0.000250804	8.40865	KCNK12
ENSG00000262185	4.43336	8.28864	2.6813	8.94376	0.00278419	0.0304129	0.535372	LINC02861
ENSG00000286445	30.0264	8.28179	1.35383	54.5776	1.49428e-13	5.38647e-11	8.82733
ENSG00000228043	24.0096	8.267	1.4439	41.138	1.41852e-10	2.73045e-08	8.74359
ENSG00000251604	29.6548	8.25217	1.69799	24.3406	8.0719e-07	5.26426e-05	8.49616	LINC01385
ENSG00000288823	37.3577	8.25086	1.37881	49.4063	2.08076e-12	6.1572e-10	8.77453
ENSG00000110944	20.8347	8.23591	1.48184	37.0996	1.12245e-09	1.69875e-07	8.68297	IL23A
ENSG00000064989	14.9592	8.20244	1.67074	25.5449	4.32202e-07	3.11594e-05	8.50369	CALCRL
ENSG00000286931	17.8245	8.18319	1.46746	38.0313	6.96195e-10	1.09546e-07	8.62372
ENSG00000261423	13.9063	8.17706	1.67384	25.1343	5.34719e-07	3.78619e-05	8.44704	TMEM202-AS1
ENSG00000287166	4.36362	8.16895	2.28451	12.5529	0.000395585	0.00747653	7.63741
ENSG00000155962	25.8922	8.14669	1.44177	45.8623	1.26864e-11	3.06732e-09	7.57994	CLIC2
ENSG00000269994	26.187	8.14542	1.44001	46.3632	9.82414e-12	2.43467e-09	7.6088	LINC02893
ENSG00000153064	9.24579	8.14486	2.18264	13.2422	0.000273722	0.00557168	7.7442	BANK1
ENSG00000287390	7.88993	8.11839	1.95412	16.9834	3.77071e-05	0.00118852	8.06497
ENSG00000119917	36.3581	8.09422	1.42122	48.277	3.70066e-12	1.00506e-09	7.56831	IFIT3
ENSG00000283900	7.60849	8.07966	1.76411	21.7344	3.13129e-06	0.00015443	8.23763	TPTEP2-CSNK1E
ENSG00000287808	34.2433	8.0579	1.47221	34.6474	3.95173e-09	5.10194e-07	7.48441
ENSG00000281189	8.5385	8.05041	1.83455	19.4344	1.04113e-05	0.000412829	8.12316	GHET1
ENSG00000290114	11.2146	8.03403	2.25226	11.9838	0.000536659	0.00931634	7.47731	NA
ENSG00000136828	16.9543	8.03304	1.46279	36.951	1.21134e-09	1.80572e-07	8.45134	RALGPS1
ENSG00000153291	10.2571	8.02431	1.82813	19.3265	1.10166e-05	0.000431651	8.08559	SLC25A27
ENSG00000218510	16.1944	8.02117	1.63401	25.8519	3.68639e-07	2.7069e-05	8.30334	LINC00339
ENSG00000269964	4.10782	8.01748	2.51135	10.1059	0.00147795	0.0195868	0.673589	MEI4
ENSG00000206432	4.46001	8.01365	2.32228	11.5684	0.000670819	0.0110462	7.35002	TMEM200C
ENSG00000105672	21.2117	8.01187	1.50693	32.9554	9.42977e-09	1.0933e-06	8.38465	ETV2
ENSG00000224689	14.4009	8.006	1.85811	18.4264	1.76597e-05	0.000628585	8.03449	ZNF812P
ENSG00000280132	17.6307	8.00404	1.52915	31.0197	2.55419e-08	2.65128e-06	7.37357
ENSG00000247402	3.89501	8.00171	2.56173	9.63223	0.00191192	0.0232836	0.59064
ENSG00000257497	10.7484	7.99625	1.82447	19.4713	1.02124e-05	0.000406568	8.08815
ENSG00000104361	8.45705	7.99452	2.62643	8.67518	0.00322573	0.0337307	0.451045	NIPAL2
ENSG00000280399	4.3071	7.99127	2.34418	11.5588	0.000674301	0.0110813	7.31437
ENSG00000271200	17.5066	7.98708	1.67942	23.6542	1.15294e-06	6.9478e-05	8.19772	PATJ-DT
ENSG00000163235	13.5363	7.93102	1.67019	23.8008	1.0684e-06	6.57829e-05	8.14243	TGFA
ENSG00000179046	28.3864	7.92728	1.62846	25.2738	4.97423e-07	3.53474e-05	8.18473	TRIML2
ENSG00000164197	6.28723	7.88196	2.18375	12.766	0.000352982	0.006861	7.43651	RNF180
ENSG00000270820	11.2466	7.86964	1.68988	22.7868	1.81007e-06	0.00010195	8.04913	USP34-DT
ENSG00000288009	9.53449	7.86323	1.89376	17.171	3.4162e-05	0.00109241	7.82541
ENSG00000134757	15.2495	7.85951	1.66934	23.3658	1.33942e-06	7.76472e-05	8.03636	DSG3
ENSG00000261094	9.38455	7.85355	1.94474	16.0243	6.25331e-05	0.00179419	7.71705
ENSG00000260643	6.21534	7.85006	2.56925	8.86262	0.0029107	0.0313969	0.490601
ENSG00000135766	15.5235	7.84256	1.7608	20.1424	7.18869e-06	0.000309365	7.91738	EGLN1
ENSG00000131778	47.5805	7.83928	1.33381	51.2499	8.13243e-13	2.55926e-10	8.30872	CHD1L
ENSG00000151789	9.63952	7.83921	1.78147	20.9625	4.68369e-06	0.00021696	6.88907	ZNF385D
ENSG00000166049	18.0908	7.82628	1.68715	22.4341	2.17475e-06	0.000117805	7.99456	PASD1
ENSG00000286208	8.69423	7.81951	2.11477	13.2268	0.000275981	0.0056119	6.37752
ENSG00000259469	3.45598	7.81749	2.72492	8.07939	0.00447716	0.0424303	0.435071
ENSG00000196338	5.53711	7.80759	2.43466	9.86363	0.00168578	0.0214108	0.632422	NLGN3
ENSG00000289532	23.3153	7.80618	1.98031	15.0033	0.000107326	0.00271488	7.58437
ENSG00000176746	14.8071	7.80288	1.98882	14.9372	0.00011115	0.0027824	7.56418	MAGEB6
ENSG00000215838	4.96649	7.79959	2.16574	12.784	0.000349603	0.00680868	7.34031
ENSG00000204118	13.4903	7.79175	1.83217	18.0808	2.11725e-05	0.000733858	7.76526	NAP1L6P
ENSG00000173988	7.13543	7.77822	1.93839	16.0391	6.20475e-05	0.00178542	7.64171	LRRC63
ENSG00000182327	10.6643	7.7562	2.66867	7.95597	0.00479291	0.0445078	0.409067	GLTPD2
ENSG00000092929	20.5798	7.74383	1.57659	26.5954	2.50841e-07	1.97286e-05	7.98762	UNC13D
ENSG00000284484	33.8661	7.73844	1.44931	34.6747	3.89655e-09	5.08244e-07	8.13504
ENSG00000287048	5.66041	7.72775	2.18279	12.2609	0.000462545	0.00841323	7.20285
ENSG00000267940	6.19351	7.72627	2.33697	10.6555	0.00109743	0.0157892	6.91302
ENSG00000255150	35.2547	7.72224	1.40709	38.812	4.66641e-10	7.5833e-08	8.12184	EID3
ENSG00000244675	4.43249	7.71937	2.23857	11.8351	0.000581245	0.00988316	6.03898
ENSG00000287923	8.0775	7.70991	2.24402	11.3052	0.000772892	0.0122319	7.02561
ENSG00000289943	8.32235	7.70627	2.45726	9.45763	0.00210273	0.0250082	0.597541	NA
ENSG00000139292	14.5784	7.7035	1.73621	20.3257	6.53188e-06	0.000286507	7.8005	LGR5
ENSG00000288772	25.7953	7.70084	1.54456	27.931	1.25719e-07	1.07901e-05	7.98041
ENSG00000185267	17.2423	7.69321	1.79437	18.5143	1.68638e-05	0.000606772	7.68502	CDNF
ENSG00000247950	26.86	7.68793	1.57198	26.3202	2.8924e-07	2.20557e-05	7.93064	SEC24B-AS1
ENSG00000269559	17.0438	7.68652	1.53051	28.7401	8.27716e-08	7.49329e-06	7.98303
ENSG00000252316	14.6133	7.68154	1.71844	20.6406	5.54083e-06	0.000247974	7.7722	RNY4
ENSG00000225345	4.27902	7.67978	2.47691	9.41158	0.00215619	0.0254867	0.603835	SNX18P3
ENSG00000274652	12.2146	7.6781	2.58001	8.50981	0.00353237	0.0358775	0.485884
ENSG00000227954	7.87535	7.67781	2.12521	12.6508	0.000375411	0.00715663	7.19068	TARID
ENSG00000213713	5.38255	7.67565	2.61968	8.41165	0.00372824	0.0373399	0.481468	PIGCP1
ENSG00000105610	18.3705	7.66682	1.80641	18.0608	2.13963e-05	0.000740319	7.64557	KLF1
ENSG00000260418	7.90327	7.66233	1.97782	14.9433	0.00011079	0.0027769	7.45497
ENSG00000270061	5.03194	7.65624	2.41683	9.71546	0.00182725	0.0226277	0.650727
ENSG00000235726	13.2344	7.65327	1.70716	22.583	2.01262e-06	0.000110532	6.82238
ENSG00000255026	3.51291	7.65117	2.43747	9.7216	0.00182115	0.0225945	0.67145
ENSG00000272192	5.24677	7.64935	2.28967	10.8364	0.000995234	0.014736	6.86127	PDE7A-DT
ENSG00000248334	10.7475	7.64801	2.00356	14.2061	0.000163838	0.0037345	7.35571	WHAMMP2
ENSG00000249383	7.7843	7.64424	2.23943	11.1978	0.000818949	0.0127947	6.9412	LINC02071
ENSG00000274460	28.4895	7.63541	1.65554	22.3726	2.24552e-06	0.000120324	7.77205
ENSG00000273723	104.214	7.62141	0.904671	101.765	6.25049e-24	1.77032e-20	7.39367	SUGT1-DT
ENSG00000133519	9.18695	7.61123	2.33177	10.1666	0.00143007	0.0191463	0.747732	ZDHHC8P1
ENSG00000288949	6.69447	7.59772	1.99227	14.3883	0.000148727	0.00348131	7.31632
ENSG00000172554	30.6249	7.59718	1.4308	40.5567	1.90996e-10	3.50307e-08	6.9967	SNTG2
ENSG00000259723	3.49723	7.59475	2.63456	8.15948	0.00428367	0.0410677	0.459938
ENSG00000281327	15.8345	7.59155	1.54824	27.1864	1.84758e-07	1.51954e-05	6.90863	LINC01338
ENSG00000242242	11.3737	7.58153	1.61554	23.896	1.01682e-06	6.28023e-05	7.75804	NECTIN3-AS1
ENSG00000107295	16.0643	7.58037	1.61143	23.9202	1.0041e-06	6.22105e-05	7.76249	SH3GL2
ENSG00000289076	14.5263	7.57816	1.64572	22.5854	2.01003e-06	0.000110532	7.72686
ENSG00000174145	5.40626	7.56886	2.52264	8.78099	0.00304385	0.03241	0.52943	NWD2
ENSG00000249348	28.2597	7.55721	1.59734	24.2276	8.55982e-07	5.52791e-05	7.73908	UGDH-AS1
ENSG00000248278	10.2438	7.55055	1.98455	14.1904	0.00016521	0.00375195	7.24671	SUMO2P17
ENSG00000289860	24.8007	7.53872	1.43639	39.2743	3.6825e-10	6.2939e-08	6.92804	NA
ENSG00000215533	11.6024	7.53147	1.8735	16.0842	6.05873e-05	0.00175471	7.38156	LINC00189
ENSG00000249413	12.0806	7.52807	1.60397	24.0038	9.61477e-07	6.07078e-05	7.70225
ENSG00000268696	6.66204	7.50971	2.03672	13.8329	0.000199807	0.00429383	6.1357	ZNF723
ENSG00000143184	5.97662	7.50285	2.38681	9.59495	0.00195113	0.0235617	0.665871	XCL1
ENSG00000275318	7.67906	7.4961	1.90389	15.5657	7.96885e-05	0.0021554	7.34708
ENSG00000146070	10.479	7.49435	1.88215	15.8339	6.9151e-05	0.00195297	7.33578	PLA2G7
ENSG00000247317	22.9581	7.48782	1.52854	27.1629	1.8701e-07	1.51954e-05	7.72445	LY6E-DT
ENSG00000173166	16.5066	7.48034	1.59533	23.9332	9.97372e-07	6.19872e-05	7.68046	RAPH1
ENSG00000196387	31.8506	7.47582	1.46566	31.0008	2.57924e-08	2.66333e-06	7.75976	ZNF140
ENSG00000226803	9.36147	7.47433	1.717	19.7538	8.80871e-06	0.000357872	7.51022	ZNF451-AS1
ENSG00000111641	30.9695	7.45044	1.43041	33.5998	6.77007e-09	8.13476e-07	7.75813	NOP2
ENSG00000270959	7.10346	7.44838	1.99451	13.8388	0.000199177	0.00428759	7.11767	LPP-AS2
ENSG00000270362	23.7323	7.4233	1.42147	39.7671	2.86131e-10	5.06503e-08	6.81759	HMGN3-AS1
ENSG00000259577	12.9852	7.42294	2.18287	11.1547	0.0008382	0.0129931	6.72852	CERNA1
ENSG00000238317	8.84358	7.4208	2.0649	12.7016	0.000365335	0.0069982	6.96749	SNORD11
ENSG00000174950	13.8359	7.41184	1.97494	13.832	0.000199899	0.00429383	7.08673	CD164L2
ENSG00000263843	8.12439	7.41157	1.80499	17.2391	3.29579e-05	0.00106075	7.31447	MIF4GD-DT
ENSG00000278972	14.3903	7.41086	1.7142	19.3956	1.06251e-05	0.000420466	7.41578
ENSG00000260409	4.70592	7.40262	2.40191	9.27291	0.00232568	0.0268232	0.630886
ENSG00000183304	12.3897	7.39891	1.81202	17.5104	2.85747e-05	0.000942764	6.32972	FAM9A
ENSG00000289174	10.4315	7.39207	1.97084	13.9516	0.000187578	0.00409123	7.03149
ENSG00000285763	9.93031	7.3567	1.88029	15.756	7.20572e-05	0.0020178	6.18198
ENSG00000101846	20.7786	7.35394	1.49305	28.019	1.2013e-07	1.04004e-05	7.62478	STS
ENSG00000164620	38.306	7.35086	1.41962	33.5238	7.03989e-09	8.35765e-07	7.64334	RELL2
ENSG00000287146	4.51888	7.34226	2.58539	7.87495	0.00501244	0.0459014	0.454696
ENSG00000272807	5.30844	7.33526	2.50568	8.38306	0.00378734	0.0376568	0.514401
ENSG00000289379	10.7341	7.32268	1.86772	15.4271	8.57487e-05	0.00229427	7.12852
ENSG00000229525	8.16769	7.31192	2.35927	9.28527	0.00231004	0.0266738	0.637236
ENSG00000197385	6.31298	7.30244	2.31874	9.82389	0.00172259	0.0217451	6.31369	ZNF860
ENSG00000258947	381.461	7.29268	1.30221	48.4352	3.4138e-12	9.40028e-10	7.63523	TUBB3
ENSG00000163050	36.6471	7.28892	1.45876	29.818	4.74574e-08	4.48043e-06	7.53021	COQ8A
ENSG00000286340	17.4639	7.28025	1.5829	25.7324	3.92195e-07	2.86925e-05	6.53403
ENSG00000285813	5.7786	7.26788	2.31368	9.75097	0.00179228	0.0224471	0.845688
ENSG00000224157	13.1858	7.26723	1.81881	16.1349	5.89869e-05	0.00172235	7.11346	HCG14
ENSG00000272631	25.5736	7.2606	1.43629	31.2879	2.22458e-08	2.37121e-06	7.528
ENSG00000271826	12.5507	7.25201	2.25364	10.009	0.00155774	0.020345	0.884285	PLS3-AS1
ENSG00000150672	8.29329	7.24098	2.11348	11.4786	0.000704023	0.011406	5.63148	DLG2
ENSG00000242474	16.8797	7.23702	1.75976	18.081	2.11702e-05	0.000733858	6.21076
ENSG00000240673	14.9748	7.23222	1.51835	22.0991	2.58925e-06	0.000133266	6.52442
ENSG00000229404	6.22369	7.22524	1.93008	14.0726	0.000175887	0.00389062	6.90438	LINC00858
ENSG00000260947	10.6995	7.22361	1.87555	14.9291	0.000111631	0.00278388	6.99533
ENSG00000271991	8.65229	7.2236	1.96495	13.3985	0.000251825	0.00521701	6.83442	TTC32-DT
ENSG00000259172	6.80868	7.21713	2.13501	11.2242	0.000807362	0.0126536	6.50536	SNRPA1-DT
ENSG00000179603	21.7404	7.21664	1.62672	21.0375	4.50385e-06	0.000209764	7.29831	GRM8
ENSG00000231028	4.4645	7.21635	2.38188	9.03485	0.0026488	0.0293053	0.631402	LINC00271
ENSG00000186976	6.80891	7.21147	2.17401	10.7902	0.00102038	0.0150307	6.42914	EFCAB6
ENSG00000262202	5.80096	7.2114	1.85983	15.3262	9.04513e-05	0.00238787	6.99684
ENSG00000289314	10.2774	7.19041	2.22802	10.1135	0.00147187	0.0195324	6.26161
ENSG00000288573	12.6187	7.18384	2.50376	7.96802	0.0047611	0.0443	0.471855
ENSG00000226043	52.8872	7.17503	1.35489	45.9698	1.20091e-11	2.93942e-09	6.59963
ENSG00000155849	12.3885	7.17468	1.69074	19.2527	1.14507e-05	0.000443403	6.28887	ELMO1
ENSG00000228013	4.8336	7.17156	2.38096	8.91964	0.00282121	0.0307326	0.617194	IL6R-AS1
ENSG00000273284	15.9683	7.16836	1.78833	14.868	0.0001153	0.00284675	6.13298
ENSG00000271933	14.5923	7.16733	2.42952	8.41043	0.00373074	0.0373399	0.525014
ENSG00000285602	12.8629	7.1669	1.67813	19.1618	1.20095e-05	0.000461433	7.16724
ENSG00000136014	21.0787	7.16621	1.83041	15.4999	8.25096e-05	0.00221959	7.0083	USP44
ENSG00000101951	11.3129	7.16441	1.69925	19.8111	8.54828e-06	0.000351614	6.20986	PAGE4
ENSG00000063515	8.013	7.15086	2.16808	10.7475	0.0010442	0.015256	6.38368	GSC2
ENSG00000173209	41.1509	7.14698	1.10805	53.7144	2.31859e-13	7.79125e-11	6.78883	AHSA2P
ENSG00000286707	23.2068	7.14568	1.89523	12.5089	0.000405011	0.00759806	6.87713
ENSG00000283064	4.58457	7.14416	2.45966	8.30413	0.0039555	0.038746	0.534674
ENSG00000286652	9.73771	7.14375	1.63797	20.3651	6.39863e-06	0.000281909	7.20388
ENSG00000237489	8.67017	7.14169	1.92299	14.3161	0.000154535	0.00357923	5.94021	C10orf143
ENSG00000283108	34.1187	7.13672	1.40282	38.3987	5.76717e-10	9.14719e-08	6.52152
ENSG00000247627	355.696	7.1144	0.585245	147.328	6.65189e-34	6.59402e-30	7.01183	MTND4P12
ENSG00000288764	20.9461	7.11365	1.56344	22.7953	1.80207e-06	0.000101789	7.20799
ENSG00000076258	8.2379	7.10526	2.05027	11.9083	0.000558838	0.00956388	6.53529	FMO4
ENSG00000259826	17.3174	7.09743	1.62467	20.3971	6.2924e-06	0.000277847	7.12844	CDK13-DT
ENSG00000272894	10.227	7.09617	2.10924	11.0915	0.000867225	0.0132769	6.36019	MIOS-DT
ENSG00000224765	5.42901	7.09433	2.27667	9.61447	0.0019305	0.0234235	0.849286
ENSG00000272247	10.2274	7.09096	1.6608	19.3478	1.08946e-05	0.000428563	7.09244
ENSG00000261441	43.5057	7.08818	1.45256	28.3961	9.88666e-08	8.75057e-06	7.30068	POLG-DT
ENSG00000274528	3.36723	7.08153	2.3943	8.56181	0.00343288	0.0352462	0.726311
ENSG00000225087	13.3738	7.07345	1.71417	17.7359	2.53789e-05	0.000858638	6.96647
ENSG00000279035	11.9963	7.06675	1.92213	13.4635	0.000243256	0.00506595	6.66031
ENSG00000064547	58.0662	7.06408	1.42603	30.0038	4.31194e-08	4.19061e-06	7.31365	LPAR2
ENSG00000289152	7.09404	7.05905	2.45954	8.0595	0.00452657	0.0427351	0.505531
ENSG00000115267	13.3707	7.03758	1.872	14.2057	0.000163877	0.0037345	6.74366	IFIH1
ENSG00000104112	7.62883	7.02958	1.9928	12.4333	0.000421738	0.00780707	6.53835	SCG3
ENSG00000259523	8.0944	7.02836	1.87822	14.1602	0.000167884	0.00378666	6.71988
ENSG00000223653	14.0887	7.01758	1.61806	20.2132	6.92729e-06	0.00029987	7.04443
ENSG00000286819	14.8986	7.01229	1.75062	16.4608	4.96666e-05	0.00149422	6.85448
ENSG00000240063	5.01997	7.0031	2.46715	7.95688	0.0047905	0.0445063	0.505452
ENSG00000285761	12.2729	6.99574	2.1384	10.4886	0.00120111	0.0168058	6.14354
ENSG00000255559	12.8791	6.98696	2.14996	10.3364	0.0013043	0.0178584	6.1155	ZNF252P-AS1
ENSG00000164458	6.80749	6.98462	2.15593	10.3405	0.00130143	0.0178315	6.09759	TBXT
ENSG00000170954	20.974	6.98428	1.55522	24.6807	6.7657e-07	4.62541e-05	6.19027	ZNF415
ENSG00000145087	8.09878	6.98044	2.10488	10.889	0.000967381	0.0143845	6.23981	STXBP5L
ENSG00000137573	6.76935	6.97907	2.26745	9.39843	0.00217171	0.0255983	0.80928	SULF1
ENSG00000279134	17.1251	6.96795	1.46596	30.538	3.27398e-08	3.2455e-06	6.26641
ENSG00000233360	6.75224	6.95948	2.32139	8.83318	0.00295802	0.0317691	0.642881	PDXP-DT
ENSG00000225806	13.6247	6.95186	1.80164	15.1912	9.71574e-05	0.0025265	6.7391
ENSG00000255384	8.761	6.94411	2.27053	9.17259	0.00245666	0.0277546	0.726047
ENSG00000279207	8.46285	6.93423	1.96013	12.8849	0.00033125	0.0065341	5.62092
ENSG00000279227	11.9475	6.93115	2.07281	11.0109	0.00090577	0.013664	6.1776
ENSG00000233381	16.3126	6.9307	1.98298	12.1189	0.000499126	0.00887503	5.45784	AK4P3
ENSG00000099260	4.78742	6.9221	2.18914	9.98571	0.0015776	0.0205098	5.9557	PALMD
ENSG00000264204	5.3973	6.92065	2.06759	11.2297	0.000804983	0.0126363	6.22785	AGAP7P
ENSG00000224846	17.1823	6.92027	1.46071	26.5423	2.57824e-07	2.01245e-05	7.08736	NQO2-AS1
ENSG00000235092	10.4202	6.91542	2.21947	9.5243	0.00202769	0.0243392	0.873239	ID2-AS1
ENSG00000214429	7.59984	6.90956	1.83606	14.477	0.000141881	0.00335273	6.59055	CYCSP6
ENSG00000243592	48.6599	6.9035	1.58442	16.163	5.81194e-05	0.00169952	6.05715	RPL17P22
ENSG00000233937	44.1009	6.90342	1.78888	15.6205	7.74096e-05	0.00210997	5.76051	CTC-338M12.4
ENSG00000225506	7.43563	6.89949	2.28008	8.62727	0.00331167	0.034404	0.761258	CYP4A22-AS1
ENSG00000267107	10.7259	6.8909	1.89238	13.3219	0.000262324	0.00537276	6.48682	PCAT19
ENSG00000224358	10.0574	6.88913	2.38396	8.18546	0.00422274	0.0406014	0.546591	TMCO1-AS1
ENSG00000233101	7.84904	6.88018	2.02928	11.4008	0.000734111	0.0117946	5.31099	HOXB-AS3
ENSG00000223509	10.2406	6.87017	1.60715	17.6493	2.65611e-05	0.000892544	6.0087
ENSG00000253636	6.1458	6.86358	2.19137	9.61523	0.0019297	0.0234235	5.00658
ENSG00000130812	7.71307	6.85366	1.91539	12.8935	0.000329733	0.00652423	6.4057	ANGPTL6
ENSG00000182111	13.9932	6.85043	1.38592	24.4834	7.49515e-07	4.98654e-05	6.23553	ZNF716
ENSG00000289558	15.9447	6.84988	1.59507	19.9598	7.90864e-06	0.000332902	6.84347
ENSG00000261420	14.0463	6.84286	1.59424	19.995	7.76437e-06	0.000328223	6.8317	MPC1-DT
ENSG00000227388	4.50429	6.84212	2.29373	8.80792	0.00299926	0.0321385	0.876671
ENSG00000206828	14.5528	6.8359	1.62492	18.9042	1.37453e-05	0.000513208	6.80595	RNVU1-30
ENSG00000289253	8.61857	6.83202	1.92944	12.6041	0.0003849	0.00730241	6.35725
ENSG00000068976	4.89622	6.8311	2.28615	8.89312	0.00286247	0.0310549	0.704397	PYGM
ENSG00000257261	27.2763	6.81583	1.28906	39.2852	3.66215e-10	6.2939e-08	6.30583
ENSG00000231304	8.95721	6.81477	1.78223	14.983	0.000108484	0.0027364	6.55642	SGO1-AS1
ENSG00000226757	5.161	6.79857	2.05104	11.0342	0.000894453	0.0135771	6.05864	PP12613
ENSG00000171817	8.11081	6.78513	1.75914	15.366	8.85681e-05	0.00235067	6.55609	ZNF540
ENSG00000175287	15.811	6.78448	1.54823	21.2604	4.00928e-06	0.00019049	6.82261	PHYHD1
ENSG00000146859	9.97883	6.78246	1.75347	15.4481	8.48036e-05	0.00227205	6.56284	TMEM140
ENSG00000225792	12.1213	6.78057	2.27278	8.75459	0.00308823	0.032812	0.667063
ENSG00000164627	14.2367	6.77965	2.11184	9.93201	0.00162429	0.0209384	4.95909	KIF6
ENSG00000275880	6.33751	6.77788	2.09418	10.303	0.00132813	0.0180865	5.01686
ENSG00000182916	7.7097	6.77527	2.3065	8.52665	0.00349984	0.0357117	0.626259	TCEAL7
ENSG00000179528	24.7099	6.76327	1.87548	13.0506	0.000303185	0.00608396	6.32993	LBX2
ENSG00000286813	6.79829	6.75891	2.38833	7.94254	0.0048286	0.0447411	0.539055
ENSG00000230699	6.96076	6.75443	1.8212	14.1022	0.000173144	0.00386748	6.40154
ENSG00000267871	12.6716	6.74801	1.65186	17.6587	2.64305e-05	0.000889664	6.64442	ZNF460-AS1
ENSG00000229920	5.74502	6.73994	2.12136	9.97887	0.00158346	0.0205496	4.91436	RPS4XP5
ENSG00000247151	13.0991	6.73363	1.90169	12.5792	0.000390056	0.00739316	6.22415	CSTF3-DT
ENSG00000225335	10.1398	6.71702	1.94544	11.9413	0.000549021	0.00946511	6.13425
ENSG00000165511	9.41267	6.69578	1.9828	11.401	0.000734058	0.0117946	6.02653	ZNF22-AS1
ENSG00000281468	4.89048	6.68571	2.32235	8.27671	0.00401568	0.0391228	0.609065
ENSG00000234350	9.21242	6.67341	1.75832	14.8691	0.000115237	0.00284675	6.39
ENSG00000256442	9.14675	6.66726	1.8753	12.7848	0.000349439	0.00680868	6.18754
ENSG00000289447	7.61521	6.66588	1.87452	12.8519	0.000337139	0.00661793	6.19863
ENSG00000237575	31.0609	6.66255	1.45799	24.333	8.10389e-07	5.26735e-05	6.78694	PYY2
ENSG00000289115	5.05992	6.65883	2.30335	8.35532	0.0038456	0.0379318	0.631821
ENSG00000175544	27.6555	6.64911	1.36906	21.1181	4.31823e-06	0.000202396	6.02339	CABP4
ENSG00000269054	7.85178	6.64632	1.95053	11.6722	0.000634409	0.0105746	6.02322	ZNF497-AS1
ENSG00000124249	11.7401	6.63997	1.87177	12.6926	0.000367099	0.00702519	6.14663	KCNK15
ENSG00000251867	4.70604	6.63858	2.00404	11.2243	0.000807343	0.0126536	5.04767
ENSG00000289055	18.8166	6.63333	1.54413	20.4153	6.23286e-06	0.000275832	6.62647
ENSG00000224965	7.81312	6.62557	1.98429	11.1837	0.000825175	0.0128654	5.92211	LINC02586
ENSG00000188825	10.5263	6.61839	2.03674	10.504	0.00119115	0.0166896	5.05952	LINC00910
ENSG00000187569	27.4003	6.61576	1.53205	20.5432	5.83003e-06	0.000259162	6.63653	DPPA3
ENSG00000240291	15.8171	6.60659	1.87202	12.7538	0.000355288	0.00689231	5.25556
ENSG00000250514	7.21788	6.60093	2.09483	9.90327	0.00164985	0.0212215	5.61219	LINC02125
ENSG00000272438	9.15183	6.59937	2.16269	9.25851	0.00234404	0.0269565	5.43485
ENSG00000234911	10.4631	6.59666	1.78869	13.9487	0.000187871	0.0040931	6.23053	TEX21P
ENSG00000290008	12.6502	6.59385	1.68287	16.0887	6.04434e-05	0.00175454	6.38205	NA
ENSG00000289499	13.8163	6.59049	1.62559	17.5596	2.78436e-05	0.000926221	6.48412
ENSG00000213057	14.3234	6.58935	1.54997	22.3875	2.22817e-06	0.000120145	5.78408	C1orf220
ENSG00000203593	5.85318	6.587	1.93333	11.7981	0.000592922	0.0100644	5.99163
ENSG00000171405	8.16593	6.58021	1.73128	15.0305	0.00010579	0.00268898	6.30867	XAGE5
ENSG00000229291	5.49702	6.57719	2.18643	9.08493	0.00257724	0.0286709	0.930556	LINC02768
ENSG00000227855	6.68713	6.57539	1.95676	11.4011	0.000734024	0.0117946	5.90853	DPY19L2P3
ENSG00000229361	5.53396	6.57105	2.19613	9.02457	0.00266374	0.0294214	0.934133	UBTFL7
ENSG00000213965	10.5488	6.56332	2.03424	10.3926	0.00126518	0.0175042	5.68757	NUDT19
ENSG00000226933	9.21716	6.55776	1.80663	13.9426	0.000188479	0.00410186	5.339	NRBF2P2
ENSG00000226476	50.4028	6.54792	0.94498	64.3613	1.03573e-15	5.61207e-13	6.26746	LINC01748
ENSG00000237505	12.6801	6.54102	1.43746	21.6492	3.27342e-06	0.000160244	5.84529	PKN2-AS1
ENSG00000228126	39.8582	6.52104	1.51208	20.8704	4.91441e-06	0.000226205	6.49774	FALEC
ENSG00000273045	14.8215	6.50959	1.60388	17.7161	2.56451e-05	0.000866167	6.39757	C2orf15
ENSG00000113749	10.1033	6.50194	1.85059	12.5567	0.000394788	0.00746858	6.00258	HRH2
ENSG00000289311	9.49246	6.49619	1.68326	14.4904	0.000140873	0.00333288	5.49829
ENSG00000239322	11.5666	6.49325	1.83127	12.7928	0.00034796	0.00679002	6.00743	ATP6V1B1-AS1
ENSG00000254044	31.974	6.47104	0.992849	52.5232	4.25206e-13	1.38199e-10	6.15269
ENSG00000267219	6.67063	6.46746	2.01395	10.3791	0.00127449	0.0175838	5.60291
ENSG00000183935	12.0478	6.46664	1.6928	16.21	5.66951e-05	0.00166524	5.3986	HTR7P1
ENSG00000229191	16.3209	6.45801	1.77293	13.3999	0.000251641	0.00521701	6.10758
ENSG00000099822	5.76641	6.45724	2.03978	10.1344	0.0014553	0.0193831	5.54503	HCN2
ENSG00000287769	13.2247	6.44361	1.70704	15.2117	9.61066e-05	0.00250419	5.41996
ENSG00000228201	7.3924	6.43142	1.97367	10.7318	0.00105311	0.0153561	5.64752
ENSG00000162572	8.80158	6.42695	2.11622	9.25615	0.00234705	0.0269755	5.28771	SCNN1D
ENSG00000258682	9.15827	6.40207	1.93127	11.1249	0.000851787	0.0131216	5.69815
ENSG00000240401	7.70477	6.39974	1.90452	11.6181	0.000653134	0.0108089	4.9142
ENSG00000164675	11.3624	6.39476	1.81542	12.7561	0.000354848	0.00689051	5.17195	IQUB
ENSG00000152578	10.3033	6.38441	1.85571	12.1013	0.000503862	0.0089113	5.84257	GRIA4
ENSG00000272293	22.0465	6.38174	1.312	24.3746	7.93092e-07	5.18939e-05	5.80001
ENSG00000241622	13.0108	6.37924	1.96914	10.5731	0.00114745	0.0162963	5.53462	RARRES2P1
ENSG00000101134	8.21794	6.37187	1.99032	10.2981	0.00133165	0.0181079	4.69966	DOK5
ENSG00000081386	27.9324	6.36937	1.25424	23.6944	1.12912e-06	6.86685e-05	5.83112	ZNF510
ENSG00000272173	5.18741	6.35909	1.96237	10.6857	0.00107969	0.0155927	5.55099
ENSG00000213316	8.10229	6.35385	2.15619	8.36166	0.00383221	0.0378751	0.951908	LTC4S
ENSG00000277693	28.7774	6.35139	1.27291	25.579	4.24641e-07	3.0726e-05	5.80227
ENSG00000272145	11.9691	6.34916	1.67394	15.1327	0.00010021	0.00257353	6.06547	NFYC-AS1
ENSG00000078725	12.2658	6.34901	1.72429	14.0043	0.000182392	0.00400216	6.01319	BRINP1
ENSG00000269858	68.7025	6.34675	1.5413	18.5863	1.62386e-05	0.000586593	6.21031	EGLN2
ENSG00000289985	13.594	6.343	1.68583	14.8113	0.000118824	0.002912	6.02209	NA
ENSG00000272097	5.46582	6.34188	2.21109	8.29471	0.00397607	0.0389089	0.703851	TMEM14B-DT
ENSG00000234062	11.2239	6.33996	2.18701	8.41075	0.0037301	0.0373399	0.722043
ENSG00000278615	31.1176	6.33926	1.24447	38.7258	4.87721e-10	7.79803e-08	5.83838	C11orf98
ENSG00000100558	11.6233	6.32871	1.83137	12.1762	0.000484033	0.0086767	5.76793	PLEK2
ENSG00000178081	17.3478	6.3286	1.39833	25.3718	4.72787e-07	3.37175e-05	5.66839	ULK4P3
ENSG00000158764	7.87766	6.32822	2.18152	8.474	0.00360257	0.0364226	0.749417	ITLN2
ENSG00000227279	9.20486	6.32734	1.99988	10.1258	0.00146205	0.019441	5.4421
ENSG00000248079	4.73023	6.32106	1.9781	10.4018	0.0012589	0.0174539	5.44995	DPH6-DT
ENSG00000286366	12.8456	6.31612	2.13122	8.80179	0.00300935	0.0321809	0.893622
ENSG00000278530	22.4764	6.31326	1.42877	18.8353	1.42509e-05	0.000526142	5.59436	CHMP1B2P
ENSG00000111837	9.1296	6.30688	1.87072	12.0286	0.000523914	0.00916027	4.96426	MAK
ENSG00000289161	4.89251	6.30083	2.01815	9.90108	0.00165181	0.0212215	5.31711
ENSG00000196972	12.097	6.30036	1.84862	11.0039	0.000909201	0.0136974	4.94437	SMIM10L2B
ENSG00000198759	7.49747	6.28923	1.92796	10.8002	0.00101487	0.0149708	5.50932	EGFL6
ENSG00000214727	9.5667	6.27191	1.68036	15.1728	9.81067e-05	0.00253594	5.24851	RPL5P35
ENSG00000255008	15.593	6.2701	1.55998	17.6285	2.68533e-05	0.000900836	6.11725	LINC02739
ENSG00000287574	22.7704	6.2689	2.09392	8.98728	0.00271865	0.0298614	4.9774
ENSG00000279539	28.7422	6.26812	1.3647	20.808	5.07715e-06	0.000230871	5.60715
ENSG00000286362	14.7889	6.26526	1.55264	19.6889	9.11314e-06	0.000368729	5.35638
ENSG00000197479	17.222	6.26287	1.91529	10.5244	0.00117807	0.0165627	4.77743	PCDHB11
ENSG00000101222	5.8584	6.26121	2.07826	9.18251	0.00244339	0.0276815	5.07362	SPEF1
ENSG00000165325	10.381	6.25289	1.77426	12.187	0.000481227	0.00864392	5.04436	DEUP1
ENSG00000287016	89.2125	6.2522	0.835264	66.1488	4.18137e-16	2.67419e-13	6.01998
ENSG00000199990	7.30781	6.23501	2.07409	8.92577	0.00281175	0.0306632	4.19968	VTRNA1-1
ENSG00000259969	12.3051	6.23199	1.71798	13.9181	0.000190948	0.00414648	5.13734
ENSG00000141293	9.66691	6.22694	2.04306	9.25197	0.00235242	0.0270054	4.30437	SKAP1
ENSG00000272800	9.21993	6.22405	1.89162	11.0173	0.000902636	0.0136504	5.50862
ENSG00000271643	17.8801	6.22104	1.29522	25.5823	4.23909e-07	3.0726e-05	5.64142	PDCD6IP-DT
ENSG00000172238	12.1249	6.21595	1.73758	14.0931	0.00017398	0.0038713	5.07661	ATOH1
ENSG00000227355	99.0521	6.21219	1.31595	19.3837	1.06915e-05	0.000421412	5.594
ENSG00000164744	8.81493	6.21028	2.22937	7.82457	0.00515407	0.046745	0.624538	SUN3
ENSG00000258891	7.20292	6.20731	1.76026	12.8915	0.00033008	0.00652458	5.71763
ENSG00000253485	8.7892	6.20389	1.74466	12.4966	0.000407684	0.00761261	5.02793	PCDHGA5
ENSG00000124713	7.01353	6.20089	2.09468	8.90142	0.00284949	0.0309387	4.93939	GNMT
ENSG00000269335	95.4345	6.19973	1.32587	36.3248	1.67025e-09	2.36531e-07	5.55498	IKBKG
ENSG00000185532	39.2492	6.19664	1.12485	33.4013	7.49748e-09	8.79557e-07	5.76587	PRKG1
ENSG00000263080	9.01952	6.18271	1.76297	12.7356	0.00035877	0.00692538	5.67369
ENSG00000281912	6.3828	6.17901	2.16132	8.2789	0.00401085	0.0391141	0.761287	LINC01144
ENSG00000233672	7.56781	6.17709	1.82669	11.99	0.000534868	0.00930921	4.88738	RNASEH2B-AS1
ENSG00000261335	11.2085	6.17585	2.16203	8.22339	0.00413539	0.0400138	0.73137
ENSG00000186439	30.5856	6.1728	1.27091	21.5154	3.50994e-06	0.000169314	5.60197	TRDN
ENSG00000260572	22.0449	6.1646	1.78452	12.2463	0.000466182	0.00846385	5.58123	PPM1L-DT
ENSG00000138378	7.3602	6.14518	1.96115	9.97506	0.00158674	0.0205747	5.22455	STAT4
ENSG00000255947	6.89512	6.13503	1.90993	10.5666	0.0011515	0.0163346	5.29127
ENSG00000204427	53.4217	6.13114	1.53017	17.6973	2.58996e-05	0.000873275	5.93987	ABHD16A
ENSG00000120675	6.73848	6.12854	1.89379	10.7098	0.0010657	0.0154732	5.34277	DNAJC15
ENSG00000134072	19.7646	6.12275	1.59425	15.8165	6.97904e-05	0.00196543	5.86517	CAMK1
ENSG00000229267	29.8114	6.12263	1.25969	21.8118	3.00749e-06	0.000151336	5.5533	SNHG31
ENSG00000240399	5.38529	6.11973	2.10942	8.54931	0.00345653	0.0354339	0.950832
ENSG00000102445	9.97975	6.11855	1.77567	12.2121	0.000474817	0.00855793	5.57286	RUBCNL
ENSG00000228175	9.86151	6.10579	2.20619	7.76523	0.00532614	0.0477379	0.647299	GEMIN8P4
ENSG00000249910	42.8041	6.10425	1.46154	22.7016	1.8921e-06	0.00010567	5.30138	TRIM51CP
ENSG00000270504	6.08638	6.09948	2.03057	9.1677	0.00246323	0.027811	4.90541
ENSG00000128253	43.1797	6.09358	1.44772	20.0587	7.5103e-06	0.000320213	6.05444	RFPL2
ENSG00000277581	12.726	6.09298	1.66222	14.1425	0.000169467	0.00380837	5.72831
ENSG00000215790	16.5681	6.08629	1.46715	22.4885	2.11408e-06	0.000114832	5.26359	SLC35E2A
ENSG00000264569	26.1287	6.08059	1.61519	15.2399	9.46804e-05	0.00247643	5.09313	DCXR-DT
ENSG00000069943	23.4094	6.07307	1.19873	30.2074	3.88225e-08	3.7916e-06	5.57272	PIGB
ENSG00000128340	9.7443	6.06496	2.03512	8.79374	0.00302266	0.0322818	4.05914	RAC2
ENSG00000267530	7.08869	6.05474	2.11899	8.28655	0.00399397	0.0390071	0.826623	LINC01836
ENSG00000222030	9.49544	6.03968	1.46831	16.5256	4.7997e-05	0.00145212	5.23224	LINC01793
ENSG00000264235	8.82207	6.03829	1.75986	12.2013	0.000477554	0.00859164	5.47058	MYL12-AS1
ENSG00000265148	4.98743	6.02929	1.97817	9.5004	0.00205427	0.0245542	4.96431	TSPOAP1-AS1
ENSG00000145491	9.15953	6.02919	1.92806	9.96055	0.00159931	0.0206835	5.07742	ROPN1L
ENSG00000197415	14.7494	6.01389	1.64148	14.4148	0.000146647	0.00344073	4.98384	VEPH1
ENSG00000286033	24.9615	6.00836	1.27125	31.8162	1.69475e-08	1.85635e-06	5.45292
ENSG00000259736	12.2868	5.99862	2.07051	8.51295	0.00352628	0.0358493	0.997613	CRTC3-AS1
ENSG00000203650	12.1286	5.99364	1.63802	14.4308	0.000145402	0.00341962	4.96167	LINC01285
ENSG00000288018	10.8217	5.9906	1.71225	13.4361	0.000246825	0.0051349	4.77796
ENSG00000287042	14.0258	5.98693	1.33806	21.7526	3.10168e-06	0.000153735	5.33404
ENSG00000250999	6.81408	5.98609	1.9157	9.98148	0.00158123	0.0205435	5.03872
ENSG00000267289	15.7957	5.97768	1.96621	9.36672	0.00220961	0.0259217	4.30767	PIN1-DT
ENSG00000237499	8.55864	5.97345	1.95839	9.08408	0.00257844	0.0286709	4.25468	WAKMAR2
ENSG00000285130	6.94271	5.96725	1.87945	10.3637	0.00128519	0.0176578	5.12494
ENSG00000105894	5.43751	5.96695	2.06892	8.48488	0.0035811	0.0363352	4.5408	PTN
ENSG00000145808	19.7983	5.9494	1.30426	23.6653	1.14629e-06	6.92878e-05	5.3481	ADAMTS19
ENSG00000282988	8.02717	5.94192	2.02821	8.73773	0.00311692	0.0329975	4.60991
ENSG00000249780	60.1913	5.93944	0.80543	59.5441	1.19586e-14	5.2687e-12	5.71132
ENSG00000250049	4.77211	5.93033	2.12537	7.99008	0.00470343	0.0439445	0.765519
ENSG00000227437	189.123	5.93017	0.853422	42.8524	5.90295e-11	1.20652e-08	5.67583	RPS8P4
ENSG00000288866	6.81606	5.91136	1.79871	11.4882	0.00070041	0.0113822	4.48814
ENSG00000287038	5.56285	5.90289	1.93835	9.51992	0.00203254	0.0243781	4.82895
ENSG00000253973	11.4064	5.90214	1.98179	9.03887	0.00264298	0.0292573	4.66589	NRIP3-DT
ENSG00000182050	30.4889	5.90197	1.47041	16.6579	4.47632e-05	0.00136649	5.09584	MGAT4C
ENSG00000198925	37.7077	5.90058	1.55126	15.7384	7.27321e-05	0.00203097	5.59689	ATG9A
ENSG00000277806	21.8414	5.8956	1.94765	8.79155	0.00302629	0.0322818	4.15486
ENSG00000289222	19.7577	5.88668	1.68666	12.8015	0.000346346	0.00676517	4.74178
ENSG00000125355	6.96918	5.87268	2.05923	8.30965	0.0039435	0.0386814	1.02096	TMEM255A
ENSG00000234072	14.9277	5.85392	1.56262	16.6563	4.48008e-05	0.00136649	4.84986
ENSG00000120049	8.76913	5.82603	1.80294	10.779	0.00102657	0.0150985	5.05365	KCNIP2
ENSG00000203711	12.6883	5.82405	1.78027	11.3857	0.000740128	0.011872	4.42073	LINC02901
ENSG00000253712	13.0185	5.81618	1.49213	15.1568	9.89436e-05	0.00255424	4.94712	LINC02886
ENSG00000229278	7.24368	5.81343	2.0326	8.39443	0.00376373	0.0375162	4.3542
ENSG00000244265	15.3785	5.80424	1.42664	16.5236	4.80475e-05	0.00145212	5.01029	SIAH2-AS1
ENSG00000272142	5.25823	5.7875	2.09655	7.83454	0.00512572	0.0465313	0.76891	LYRM4-AS1
ENSG00000180481	10.0121	5.78673	1.56872	13.3042	0.000264814	0.00541817	4.78376	GLIPR1L2
ENSG00000105072	21.2981	5.77446	1.3634	19.0997	1.24066e-05	0.000473936	5.0631	C19orf44
ENSG00000196415	10.5065	5.77091	2.05575	7.99342	0.00469475	0.0439255	0.863136	PRTN3
ENSG00000258081	47.2833	5.74843	1.26137	21.2571	4.01618e-06	0.00019049	5.13388
ENSG00000226491	6.57776	5.74434	2.00743	8.4144	0.00372262	0.0373399	4.26646	FTOP1
ENSG00000240405	9.1724	5.74321	1.75536	11.1314	0.000848777	0.0131077	5.02772	SAMMSON
ENSG00000272341	5.89231	5.73261	1.99174	8.53398	0.00348577	0.0356139	4.3101
ENSG00000231154	12.0058	5.72807	1.71391	11.6497	0.000642117	0.0106711	5.08946	MORF4L2-AS1
ENSG00000148680	17.6812	5.72428	1.20861	23.754	1.0947e-06	6.69863e-05	5.17011	HTR7
ENSG00000289244	7.68623	5.70883	1.85507	9.76813	0.00177563	0.0222808	4.71341
ENSG00000166428	6.00278	5.7035	1.98299	8.51217	0.00352779	0.0358493	4.29773	PLD4
ENSG00000209082	1227.81	5.70104	0.685809	60.3858	7.79721e-15	3.65785e-12	5.53015	MT-TL1
ENSG00000261572	20.2534	5.69838	1.33916	23.4363	1.29117e-06	7.57907e-05	5.03895
ENSG00000277767	5.75975	5.67993	2.02177	8.14889	0.00430875	0.0412085	1.06508
ENSG00000259687	33.5229	5.67543	1.09064	35.1865	2.99598e-09	3.95988e-07	5.238	LINC01220
ENSG00000255121	6.91709	5.66457	1.97056	8.39506	0.00376243	0.0375162	3.62263	CENATAC-DT
ENSG00000290085	10.0567	5.64727	1.79763	10.1483	0.00144438	0.0192966	4.19528	NA
ENSG00000258636	42.3768	5.64636	1.31663	16.807	4.1381e-05	0.0012872	4.96087	LRFN5-DT
ENSG00000274750	24.5616	5.64121	1.75538	10.4774	0.00120845	0.0168723	4.87976	H3C6
ENSG00000243406	7.46589	5.64094	1.98732	8.2735	0.00402279	0.0391536	4.1083	MRPS31P5
ENSG00000254547	28.909	5.64026	1.45705	16.9686	3.80039e-05	0.00119598	5.38579
ENSG00000136160	7.51425	5.63467	2.00508	8.12581	0.00436396	0.0415081	4.02156	EDNRB
ENSG00000235493	25.6211	5.63015	1.15892	23.5943	1.18937e-06	7.14561e-05	5.12388	LINC01967
ENSG00000256463	7.15721	5.62047	1.87119	9.33656	0.00224626	0.0262111	3.87305	SALL3
ENSG00000225742	10.4523	5.5987	1.62435	13.3667	0.000256126	0.00528403	4.53031	LINC02036
ENSG00000184194	14.8374	5.58561	1.65191	10.7235	0.00105785	0.0153986	4.38786	GPR173
ENSG00000261064	5.90217	5.58142	1.97469	8.0776	0.00448157	0.0424518	3.39017	LINC02256
ENSG00000245213	12.7892	5.57765	1.57407	13.8978	0.00019302	0.00417319	4.55734
ENSG00000250920	18.5574	5.5689	1.21702	24.2085	8.64519e-07	5.56492e-05	4.99964
ENSG00000243701	32.3962	5.55786	1.10737	24.3269	8.12977e-07	5.26735e-05	5.07995	DUBR
ENSG00000237169	8.42624	5.55276	1.59587	13.8416	0.000198881	0.00428589	4.52479	RPL12P27
ENSG00000117600	6.83455	5.54724	1.78036	10.0952	0.00148654	0.0196612	4.63903	PLPPR4
ENSG00000125384	21.5896	5.54029	1.67821	11.3515	0.000753885	0.011986	4.8795	PTGER2
ENSG00000130962	23.3315	5.52993	1.12826	23.0529	1.57608e-06	9.03102e-05	5.02918	PRRG1
ENSG00000229344	48.186	5.52966	1.1301	29.9596	4.41151e-08	4.24576e-06	5.04612	MTCO2P12
ENSG00000172969	30.0259	5.51435	1.6073	12.4565	0.000416547	0.00774715	4.97405	FRG2C
ENSG00000276115	10.2242	5.51027	1.76645	9.3132	0.00227508	0.0264395	4.02577
ENSG00000248746	6.39861	5.48674	1.97688	7.7933	0.00524404	0.0473522	3.21072	ACTN3
ENSG00000277597	74.78	5.48446	1.28435	16.3468	5.27457e-05	0.00157253	4.80245
ENSG00000210164	64.7108	5.48358	0.945048	35.1007	3.13095e-09	4.11088e-07	5.13949	MT-TG
ENSG00000161610	5.64813	5.47914	1.99911	7.77652	0.00529296	0.0475694	0.929896	HCRT
ENSG00000244968	30.2764	5.47598	1.09704	27.8225	1.32969e-07	1.13143e-05	5.00725	LIFR-AS1
ENSG00000162757	10.1929	5.46481	1.82058	9.35277	0.00222649	0.0260273	4.35904	C1orf74
ENSG00000290018	441.93	5.46299	1.571	10.7254	0.00105674	0.0153937	4.3662	NA
ENSG00000104408	59261.7	5.4619	0.294619	302.215	1.08451e-67	2.15014e-63	5.42986	EIF3E
ENSG00000255883	5.60392	5.45566	1.84637	9.1591	0.00247485	0.0278786	3.81708	FUNDC2P1
ENSG00000113494	17.3077	5.44826	1.79951	8.4748	0.00360101	0.0364226	3.82429	PRLR
ENSG00000251000	7.804	5.4448	1.8413	9.32476	0.00226078	0.0263195	3.77098	GGCTP1
ENSG00000288774	10.4614	5.4436	1.85661	8.02113	0.00462348	0.043402	3.57714
ENSG00000134873	554.677	5.4323	1.1454	40.3138	2.16274e-10	3.89804e-08	4.94393	CLDN10
ENSG00000233006	7.25551	5.41757	1.75054	10.4709	0.00121268	0.0169195	3.97735	MIR3936HG
ENSG00000272844	11.0995	5.40724	1.8993	8.3787	0.00379644	0.0376718	3.93768
ENSG00000215457	25.2071	5.40436	1.18773	19.9491	7.95331e-06	0.000334073	4.83176	RPS8P3
ENSG00000205274	8.89142	5.3994	1.68149	11.0638	0.000880297	0.0134355	4.13032	TRBV20OR9-2
ENSG00000172671	37.1858	5.39785	1.20231	18.939	1.34967e-05	0.00050679	4.80959	ZFAND4
ENSG00000235613	4.90769	5.39532	1.88842	8.43594	0.00367876	0.0369622	3.56603	NSRP1P1
ENSG00000268364	38.1185	5.38334	1.39924	13.5362	0.000234002	0.0048938	4.54113	SMC5-DT
ENSG00000197956	14.259	5.38253	1.78808	9.42344	0.0021423	0.0254178	4.30853	S100A6
ENSG00000134538	10.6913	5.36699	1.7108	9.41095	0.00215693	0.0254867	3.93126	SLCO1B1
ENSG00000239149	5.87026	5.34055	1.89249	8.2896	0.00398728	0.0389622	3.83926	SNORA59A
ENSG00000268119	23.92	5.33694	1.18941	19.9981	7.75183e-06	0.000328223	4.76574
ENSG00000184381	8.61767	5.32566	1.77987	9.46695	0.00209207	0.0249113	3.66677	PLA2G6
ENSG00000234405	8.55495	5.32409	1.60268	11.2576	0.000792965	0.012517	4.15542
ENSG00000228486	6.194	5.31623	1.76852	9.48131	0.00207575	0.0247915	3.78919	C2orf92
ENSG00000288879	19.1538	5.30811	1.44534	15.9721	6.42826e-05	0.00183113	4.44087
[truncated: 1,708 more rows]

## Sheet: common hits KO_input vs IPKO_DK
	1	USP6
[truncated: 227 more rows]
