# Supplementary material for: The domesticated transposon protein L1TD1 associates with its ancestor L1 ORF1p to promote LINE-1 retrotransposition
Source: eLife. 2025 Mar 20;13:RP96850. doi: 10.7554/eLife.96850 (PMC11925450; doi:10.7554/eLife.96850)
Supplement: Supplementary file 3. [file elife-96850-supp3.xlsx]

## Sheet: Info
GEO GSE254459
Summay of differential RNA association analysis: The worksheet shows results obtained by TETranscript analysis for L1TD1 RIP-seq data from DNMT1 KO and DNMT1 L1TD1 DKO HAP1 cells. RIP-seq experiment were performed using biological triplicates.
Column Name	Description
Gene ID	Ensembl gene id
Gene name	Gene name
basemean	average of normalize count values, dividing by size factors taken over all samples
logFC	Fold change (log2) over DNMT1 KO cells
lfcSE	Standard error estimate for the log2 fold change estimate
P value	p value
adj pvalue	adjusted p value
Significantly enriched transposon transcripts were sorted according TE category

## Sheet: TEtranscripts_out_sigdiff_gene_
	baseMean	log2FoldChange	lfcSE	stat	pvalue	padj
L1PA10	8.98746	5.61629	1.71647	3.272	0.00106791	0.010312
LTR25	14.3887	5.40797	1.45181	3.72498	0.000195327	0.00259323
MER87:ERV1:LTR	16.427	3.37179	1.18233	2.85182	0.004347	0.0290471
L1PA2	37.2869	3.25878	0.683708	4.76633	1.87613e-06	5.11625e-05
L1PA3	35.617	3.16536	0.827213	3.82653	0.00012996	0.00178309
LTR60B:ERV1:LTR	11.4804	3.14426	1.13438	2.77179	0.0055749	0.0362908
LTR9C:ERV1:LTR	17.3535	3.05604	0.978549	3.12303	0.00178998	0.0151772
ERV3-16A3_LTR:ERVL:LTR	86.1461	2.91191	0.84875	3.43082	0.000601756	0.0065997
L1M3de:L1:LINE	194.884	2.84081	0.595437	4.77097	1.83341e-06	5.11625e-05
MER70-int:ERVL:LTR	19.082	2.80687	0.884545	3.17323	0.00150752	0.013828
LTR76:ERV1:LTR	39.4817	2.49117	0.921446	2.70354	0.00686042	0.0432635
HERV9NC-int:ERV1:LTR	46.2787	2.45742	0.637163	3.85682	0.000114872	0.00160981
MLT2A1:ERVL:LTR	626.369	2.44705	0.317287	7.71241	1.23468e-14	2.49158e-12
L1M3d:L1:LINE	42.4419	2.01723	0.656314	3.07358	0.00211506	0.0174926
LTR70:ERV1:LTR	312.539	1.93764	0.299681	6.46566	1.00856e-10	8.48029e-09
L1PA12:L1:LINE	288.06	1.73003	0.38019	4.55044	5.35331e-06	0.000125616
MER11A:ERVK:LTR	318.686	1.60976	0.529397	3.04074	0.00235997	0.0187473
FLAM_C:Alu:SINE	49408	1.59536	0.347044	4.59698	4.28652e-06	0.00010549
Tigger5:TcMar-Tigger:DNA	182.442	1.55299	0.446109	3.48118	0.000499204	0.00565951
L1PA6:L1:LINE	2956.76	1.519	0.178954	8.48826	2.09761e-17	7.05497e-15
MLT1E3:ERVL-MaLR:LTR	310.244	1.48192	0.361773	4.09627	4.19868e-05	0.000694503
L1PB1:L1:LINE	4689.36	1.44286	0.18202	7.92696	2.24571e-15	5.6648e-13
L1PA2:L1:LINE	20468.9	1.43734	0.191339	7.51201	5.82282e-14	7.34403e-12
AluYg6:Alu:SINE	786.52	1.40691	0.283666	4.95973	7.05909e-07	2.09489e-05
HAL1ME:L1:LINE	2546.69	1.40636	0.229771	6.1207	9.31677e-10	5.87539e-08
L1PA11:L1:LINE	1064.53	1.38989	0.273275	5.08606	3.6558e-07	1.30524e-05
MER52D:ERV1:LTR	116.017	1.38172	0.45038	3.06789	0.00215577	0.0176843
L1MB2:L1:LINE	3952.78	1.31581	0.173325	7.59159	3.16e-14	4.55491e-12
AluYb8:Alu:SINE	9608.38	1.31444	0.211163	6.22474	4.8235e-10	3.47636e-08
AluYh3a3:Alu:SINE	618.167	1.30509	0.310283	4.20613	2.59784e-05	0.000459862
L1P3:L1:LINE	317.583	1.30036	0.322458	4.03264	5.51527e-05	0.000843167
L1PA3:L1:LINE	13119.1	1.2754	0.181218	7.03792	1.95126e-12	2.18758e-10
AluYi6:Alu:SINE	1802.3	1.23959	0.265157	4.67491	2.94086e-06	7.60853e-05
AluYa5:Alu:SINE	12492.4	1.15014	0.223114	5.15492	2.53741e-07	9.48241e-06
MER1B:hAT-Charlie:DNA	749.639	1.11822	0.268888	4.15869	3.20083e-05	0.000550354
L1PA16:L1:LINE	2809.9	1.09922	0.158417	6.93873	3.9563e-12	3.9919e-10
L1PREC2:L1:LINE	971.674	1.09425	0.20869	5.24343	1.57623e-07	6.62672e-06
Charlie2b:hAT-Charlie:DNA	3263.86	1.08138	0.244133	4.42945	9.44738e-06	0.000207947
L1PA5:L1:LINE	4240.43	1.07344	0.174019	6.16853	6.89298e-10	4.63668e-08
L1M4b:L1:LINE	809.129	1.02902	0.189763	5.42264	5.87252e-08	2.57625e-06
L1MA3:L1:LINE	1926.28	1.02895	0.184177	5.58673	2.3138e-08	1.11173e-06
L1MEg1:L1:LINE	190.989	1.0276	0.338204	3.03842	0.00237825	0.0187473
L1P2:L1:LINE	922.462	1.02212	0.256138	3.9905	6.59347e-05	0.000992957
L1PA4:L1:LINE	5125.26	1.02173	0.180211	5.66963	1.43108e-08	7.21981e-07
L1PA14:L1:LINE	519.695	1.00441	0.30504	3.29273	0.000992211	0.00991229
L1HS:L1:LINE	5370.48	1.00352	0.18129	5.53544	3.10446e-08	1.42382e-06
L1MDa:L1:LINE	797.388	0.959711	0.31422	3.05427	0.00225613	0.0180669
L1PB3:L1:LINE	354.288	0.942079	0.335065	2.81163	0.0049291	0.0327201
L1MA4:L1:LINE	1190.71	0.898601	0.180205	4.98655	6.14671e-07	1.93814e-05
L1P1:L1:LINE	1027.28	0.884462	0.200541	4.41038	1.03191e-05	0.000221531
L1PA13:L1:LINE	1457.31	0.853595	0.211511	4.0357	5.44392e-05	0.000843167
MLT2A2:ERVL:LTR	538.186	0.851492	0.234415	3.63242	0.000280779	0.00358615
L1MB4:L1:LINE	1621.25	0.807448	0.176184	4.58297	4.5842e-06	0.00011013
L1PA15:L1:LINE	1676.03	0.801561	0.179486	4.46587	7.97453e-06	0.00018287
L1MD1:L1:LINE	3143.52	0.756318	0.178312	4.24155	2.21977e-05	0.000399955
L1MC2:L1:LINE	1147.08	0.704968	0.223842	3.1494	0.00163609	0.0143549
L1MA4A:L1:LINE	936.801	0.693785	0.218844	3.17023	0.00152321	0.0138461
L1M1:L1:LINE	1835.93	0.6738	0.194196	3.46969	0.00052105	0.00584155
L1MA8:L1:LINE	1208.55	0.62749	0.210254	2.98444	0.00284097	0.0210775
L1MA9:L1:LINE	2203.61	0.56626	0.189324	2.99096	0.00278104	0.0209927
LTR12C:ERV1:LTR	1311.49	0.531561	0.192386	2.76299	0.00572745	0.0370449
L1MA6:L1:LINE	1048.31	0.488235	0.174644	2.79561	0.00518025	0.0341626
L1MEf:L1:LINE	1651.63	0.487487	0.168133	2.89942	0.00373859	0.0256615
L2b:L2:LINE	9270.95	-0.410723	0.150787	-2.72386	0.00645247	0.0409468
L2c:L2:LINE	14445.8	-0.508306	0.162502	-3.12801	0.00175997	0.0151772
L1MC5a:L1:LINE	2726.45	-0.551488	0.198034	-2.78482	0.0053557	0.0350903
MLT1J2:ERVL-MaLR:LTR	463.605	-0.56655	0.213348	-2.65552	0.00791865	0.0493205
MLT1B:ERVL-MaLR:LTR	1505.26	-0.56736	0.210682	-2.69297	0.00708181	0.0443823
L2a:L2:LINE	18102.3	-0.578164	0.170453	-3.39193	0.000694033	0.00733683
MIRb:MIR:SINE	20631.3	-0.579706	0.159965	-3.62396	0.000290125	0.00365921
MER3:hAT-Charlie:DNA	1791.06	-0.601354	0.207251	-2.90157	0.00371298	0.0256603
AluJr4:Alu:SINE	5148.32	-0.60283	0.183905	-3.27794	0.00104568	0.0103016
HERVH-int:ERV1:LTR	1245.09	-0.623983	0.208831	-2.98797	0.00280834	0.0209927
L1MD:L1:LINE	2074.8	-0.646476	0.179822	-3.59508	0.000324292	0.00403964
MER21C:ERVL:LTR	1014.9	-0.654894	0.226485	-2.89156	0.00383335	0.0261341
FRAM:Alu:SINE	1388.09	-0.675137	0.176506	-3.825	0.000130772	0.00178309
L3b:CR1:LINE	1282.44	-0.685024	0.216818	-3.15944	0.00158072	0.0141151
MLT1L:ERVL-MaLR:LTR	1077.66	-0.697983	0.241763	-2.88705	0.00388867	0.0263334
MER112:hAT-Charlie:DNA	984.549	-0.702605	0.204518	-3.43541	0.000591649	0.00656015
LTR5_Hs:ERVK:LTR	5785.46	-0.711968	0.219845	-3.2385	0.00120158	0.0113308
Tigger3a:TcMar-Tigger:DNA	779.009	-0.722115	0.248173	-2.90972	0.00361752	0.0251729
MLT1D:ERVL-MaLR:LTR	2784.31	-0.739385	0.18734	-3.94675	7.92184e-05	0.00117546
LTR16D1:ERVL:LTR	1833.48	-0.74522	0.235871	-3.15943	0.00158078	0.0141151
L1ME3B:L1:LINE	1805.6	-0.782313	0.178014	-4.39467	1.10943e-05	0.000228451
Charlie1b:hAT-Charlie:DNA	399.437	-0.830773	0.279367	-2.97377	0.00294166	0.0215082
Charlie8:hAT-Charlie:DNA	471.816	-0.838518	0.271036	-3.09375	0.00197641	0.0166183
L1M4c:L1:LINE	3071.67	-0.853297	0.193781	-4.40342	1.06559e-05	0.000223995
MARNA:TcMar-Mariner:DNA	2290.71	-0.859295	0.242135	-3.54883	0.000386946	0.00464796
MER113:hAT-Charlie:DNA	280.635	-0.866919	0.260948	-3.32219	0.000893138	0.00901176
MLT1J:ERVL-MaLR:LTR	1993.27	-0.872112	0.203873	-4.27772	1.88816e-05	0.000359463
MER103C:hAT-Charlie:DNA	737.291	-0.877224	0.259781	-3.37678	0.000733392	0.00749648
L1ME3D:L1:LINE	1167.09	-0.879982	0.279666	-3.14655	0.00165212	0.0143706
MER21A:ERVL:LTR	404.925	-0.884448	0.283089	-3.12427	0.00178247	0.0151772
LTR16C:ERVL:LTR	421.803	-0.886225	0.278281	-3.18463	0.00144937	0.0134166
MIR1_Amn:MIR:SINE	2513.09	-0.886281	0.213497	-4.15127	3.30642e-05	0.000556029
LTR16A:ERVL:LTR	429.594	-0.895377	0.275019	-3.25569	0.00113117	0.0107675
Charlie15b:hAT-Charlie:DNA	833.247	-0.90727	0.260376	-3.48446	0.000493124	0.00565412
CR1_Mam:CR1:LINE	256.993	-0.915466	0.279906	-3.27062	0.00107311	0.010312
SVA_D:SVA:Retroposon	1380.53	-0.922677	0.184813	-4.9925	5.96024e-07	1.93814e-05
MER102b:hAT-Charlie:DNA	489.899	-0.928637	0.259433	-3.57948	0.000344277	0.00423629
LTR13:ERVK:LTR	762.41	-0.947087	0.307597	-3.07899	0.00207705	0.0173202
MER102a:hAT-Charlie:DNA	661.891	-0.976396	0.25259	-3.86553	0.000110848	0.00157529
LTR3:ERVK:LTR	407.083	-0.976897	0.332098	-2.94159	0.00326535	0.023367
Charlie22a:hAT-Charlie:DNA	236.983	-0.994156	0.341028	-2.91517	0.0035549	0.0250049
MER49:ERV1:LTR	360.846	-1.00334	0.339533	-2.95507	0.00312594	0.0225291
MER117:hAT-Charlie:DNA	822.572	-1.0189	0.206455	-4.93521	8.00641e-07	2.30813e-05
MER51A:ERV1:LTR	722.419	-1.08625	0.278056	-3.90659	9.3608e-05	0.00134929
Zaphod2:hAT-Tip100:DNA	319.514	-1.09628	0.32305	-3.39354	0.000689953	0.00733683
LTR16E1:ERVL:LTR	243.691	-1.1894	0.312259	-3.809	0.000139529	0.00187713
MER90a:ERV1:LTR	197.015	-1.19889	0.339357	-3.53283	0.000411134	0.00482365
7SK:RNA:RNA	150.606	-1.20132	0.366665	-3.27635	0.0010516	0.0103016
LTR89:ERVL:LTR	183.326	-1.20744	0.404105	-2.98793	0.00280873	0.0209927
MER110A:ERV1:LTR	116.536	-1.21485	0.378011	-3.21381	0.00130987	0.0122375
Helitron2Na_Mam:Helitron:RC?	1018.35	-1.22277	0.259786	-4.70683	2.51599e-06	6.68062e-05
MER4E:ERV1:LTR	194.196	-1.25221	0.365665	-3.42448	0.000615973	0.00668298
MER11B:ERVK:LTR	493.458	-1.28341	0.22495	-5.70533	1.16118e-08	6.1665e-07
MamRep1879:hAT-Tip100:DNA	108.176	-1.28999	0.43324	-2.97753	0.0029058	0.0214011
LTR26:ERV1:LTR	100.966	-1.31163	0.447872	-2.92859	0.00340509	0.0241953
MER102c:hAT-Charlie:DNA	523.845	-1.33032	0.311881	-4.26549	1.99462e-05	0.000365922
LTR12F:ERV1:LTR	215.074	-1.33475	0.378476	-3.52665	0.000420845	0.00488083
L1MB5:L1:LINE	4093.23	-1.33988	0.176328	-7.5988	2.9888e-14	4.55491e-12
LTR7B:ERV1:LTR	690.587	-1.36171	0.31818	-4.27969	1.8715e-05	0.000359463
Tigger3d:TcMar-Tigger:DNA	236.964	-1.37364	0.336501	-4.08214	4.46231e-05	0.000726204
MER9a3:ERVK:LTR	257.584	-1.37792	0.387372	-3.5571	0.000374977	0.00455846
LTR42:ERVL:LTR	131.218	-1.46388	0.48572	-3.01383	0.00257975	0.020178
MER113A:hAT-Charlie:DNA	208.987	-1.48317	0.470763	-3.15056	0.00162957	0.0143549
LTR35:ERV1:LTR	126.344	-1.48945	0.401683	-3.70802	0.000208884	0.0027372
LTR104_Mam:Gypsy:LTR	1215.13	-1.50053	0.247356	-6.06626	1.30924e-09	7.77075e-08
LTR46:ERV1:LTR	184.459	-1.50709	0.303544	-4.96499	6.87057e-07	2.09489e-05
UCON80_AMi:UCON80_AMi:Unknown	99.2376	-1.51053	0.415174	-3.63832	0.000274424	0.00354992
LTR85a:Gypsy:LTR	174.745	-1.53309	0.379227	-4.04266	5.28486e-05	0.000834327
MLT2B4:ERVL:LTR	1047.72	-1.54756	0.243631	-6.35207	2.12442e-10	1.64888e-08
HERV35I-int:ERV1:LTR	72.1218	-1.63503	0.546638	-2.99107	0.00278005	0.0209927
MamGypLTR2c:Gypsy:LTR	80.2762	-1.63916	0.418318	-3.91847	8.91141e-05	0.00130313
X6A_LINE:CR1:LINE	228.58	-1.6495	0.378347	-4.35974	1.30214e-05	0.00025762
LTR1B:ERV1:LTR	100.312	-1.65384	0.552428	-2.99377	0.00275551	0.0209927
MER65-int:ERV1:LTR	700.988	-1.66744	0.252157	-6.6127	3.77362e-11	3.46144e-09
MER47C:TcMar-Tigger:DNA	389.057	-1.66919	0.412927	-4.04234	5.29206e-05	0.000834327
Tigger11a:TcMar-Tigger:DNA	372.378	-1.68764	0.332137	-5.08116	3.75144e-07	1.30524e-05
MER76:ERVL:LTR	253.822	-1.6901	0.406522	-4.15746	3.21812e-05	0.000550354
Charlie30a:hAT-Charlie:DNA	119.145	-1.70828	0.503867	-3.39034	0.000698054	0.00733683
GSATII:centr:Satellite	211.538	-1.75449	0.396163	-4.4287	9.48026e-06	0.000207947
MER51-int:ERV1:LTR	150.948	-1.80551	0.412138	-4.38083	1.18229e-05	0.000238585
LTR24B:ERV1:LTR	65.5272	-1.89344	0.661586	-2.86196	0.00421028	0.0283211
MER94B:hAT-Blackjack:DNA	44.3392	-1.92876	0.630387	-3.05964	0.00221604	0.0180321
LTR7Y:ERV1:LTR	1212.74	-2.00203	0.208353	-9.60886	7.336e-22	7.40202e-19
LTR10G:ERV1:LTR	40.0482	-2.04316	0.701161	-2.91397	0.00356859	0.0250049
LTR40A1:ERVL:LTR	129.115	-2.0537	0.439911	-4.66845	3.03484e-06	7.65539e-05
LTR19A:ERV1:LTR	213.41	-2.06193	0.397985	-5.18091	2.20802e-07	8.91158e-06
AluJo	50.5441	-2.08352	0.617159	-3.37598	0.000735532	0.00749648
L1PBb:L1:LINE	49.8213	-2.185	0.79348	-2.75369	0.00589283	0.0378718
LTR2	50.2221	-2.2915	0.536439	-4.27168	1.94007e-05	0.000362506
REP522	38.821	-2.39759	0.677259	-3.54014	0.000399915	0.00474723
BLACKJACK:hAT-Blackjack:DNA	519.858	-2.41067	0.254794	-9.46124	3.04315e-21	1.53527e-18
FordPrefect:hAT-Tip100:DNA	134.626	-2.43563	0.484926	-5.02268	5.09542e-07	1.71376e-05
Zaphod3:hAT-Tip100:DNA	120.397	-2.47424	0.478597	-5.16978	2.34375e-07	9.09554e-06
MST-int:ERVL-MaLR:LTR	162.121	-2.52232	0.421777	-5.98023	2.22823e-09	1.24905e-07
UCON88:UCON88:Unknown	13.2023	-2.67304	1.00866	-2.65008	0.00804734	0.0498145
LTR81:Gypsy:LTR	21.5694	-2.7086	0.886348	-3.05591	0.00224375	0.0180669
FLAM_C	26.5703	-2.85458	0.845075	-3.3779	0.000730413	0.00749648
MER57E2:ERV1:LTR	12.6465	-4.34675	1.58736	-2.73835	0.00617486	0.0394332
MER72B:ERV1:LTR	13.3493	-4.77434	1.5876	-3.00727	0.00263606	0.0204599
(CATTC)n:Satellite:Satellite	57.7563	-5.55867	1.877	-2.96147	0.00306179	0.0222255

## Sheet: Categories
Name	baseMean	log2FoldChange	lfcSE	stat	pvalue	padj	geneID	category
FLAM_C:Alu:SINE	49408	1.59536	0.347044	4.59698	4.28652e-06	0.00010549	FLAM_C	Alu:SINE
AluYg6:Alu:SINE	786.52	1.40691	0.283666	4.95973	7.05909e-07	2.09489e-05	AluYg6	Alu:SINE
AluYb8:Alu:SINE	9608.38	1.31444	0.211163	6.22474	4.8235e-10	3.47636e-08	AluYb8	Alu:SINE
AluYh3a3:Alu:SINE	618.167	1.30509	0.310283	4.20613	2.59784e-05	0.000459862	AluYh3a3	Alu:SINE
AluYi6:Alu:SINE	1802.3	1.23959	0.265157	4.67491	2.94086e-06	7.60853e-05	AluYi6	Alu:SINE
AluYa5:Alu:SINE	12492.4	1.15014	0.223114	5.15492	2.53741e-07	9.48241e-06	AluYa5	Alu:SINE
LTR25	14.3887	5.40797	1.45181	3.72498	0.000195327	0.00259323	LTR25	ERV1:LTR
MER87:ERV1:LTR	16.427	3.37179	1.18233	2.85182	0.004347	0.0290471	MER87	ERV1:LTR
LTR60B:ERV1:LTR	11.4804	3.14426	1.13438	2.77179	0.0055749	0.0362908	LTR60B	ERV1:LTR
LTR9C:ERV1:LTR	17.3535	3.05604	0.978549	3.12303	0.00178998	0.0151772	LTR9C	ERV1:LTR
LTR76:ERV1:LTR	39.4817	2.49117	0.921446	2.70354	0.00686042	0.0432635	LTR76	ERV1:LTR
HERV9NC-int:ERV1:LTR	46.2787	2.45742	0.637163	3.85682	0.000114872	0.00160981	HERV9NC-int	ERV1:LTR
LTR70:ERV1:LTR	312.539	1.93764	0.299681	6.46566	1.00856e-10	8.48029e-09	LTR70	ERV1:LTR
MER52D:ERV1:LTR	116.017	1.38172	0.45038	3.06789	0.00215577	0.0176843	MER52D	ERV1:LTR
MER11A:ERVK:LTR	318.686	1.60976	0.529397	3.04074	0.00235997	0.0187473	MER11A	ERVK:LTR
ERV3-16A3_LTR:ERVL:LTR	86.1461	2.91191	0.84875	3.43082	0.000601756	0.0065997	ERV3-16A3_LTR	ERVL:LTR
MER70-int:ERVL:LTR	19.082	2.80687	0.884545	3.17323	0.00150752	0.013828	MER70-int	ERVL:LTR
MLT2A1:ERVL:LTR	626.369	2.44705	0.317287	7.71241	1.23468e-14	2.49158e-12	MLT2A1	ERVL:LTR
MLT1E3:ERVL-MaLR:LTR	310.244	1.48192	0.361773	4.09627	4.19868e-05	0.000694503	MLT1E3	ERVL-MaLR:LTR
MER1B:hAT-Charlie:DNA	749.639	1.11822	0.268888	4.15869	3.20083e-05	0.000550354	MER1B	hAT-Charlie:DNA
Charlie2b:hAT-Charlie:DNA	3263.86	1.08138	0.244133	4.42945	9.44738e-06	0.000207947	Charlie2b	hAT-Charlie:DNA
L1PA10	8.98746	5.61629	1.71647	3.272	0.00106791	0.010312	L1PA10	L1:LINE
L1PA2	37.2869	3.25878	0.683708	4.76633	1.87613e-06	5.11625e-05	L1PA2	L1:LINE
L1PA3	35.617	3.16536	0.827213	3.82653	0.00012996	0.00178309	L1PA3	L1:LINE
L1M3de:L1:LINE	194.884	2.84081	0.595437	4.77097	1.83341e-06	5.11625e-05	L1M3de	L1:LINE
L1M3d:L1:LINE	42.4419	2.01723	0.656314	3.07358	0.00211506	0.0174926	L1M3d	L1:LINE
L1PA12:L1:LINE	288.06	1.73003	0.38019	4.55044	5.35331e-06	0.000125616	L1PA12	L1:LINE
L1PA6:L1:LINE	2956.76	1.519	0.178954	8.48826	2.09761e-17	7.05497e-15	L1PA6	L1:LINE
L1PB1:L1:LINE	4689.36	1.44286	0.18202	7.92696	2.24571e-15	5.6648e-13	L1PB1	L1:LINE
L1PA2:L1:LINE	20468.9	1.43734	0.191339	7.51201	5.82282e-14	7.34403e-12	L1PA2	L1:LINE
HAL1ME:L1:LINE	2546.69	1.40636	0.229771	6.1207	9.31677e-10	5.87539e-08	HAL1ME	L1:LINE
L1PA11:L1:LINE	1064.53	1.38989	0.273275	5.08606	3.6558e-07	1.30524e-05	L1PA11	L1:LINE
L1MB2:L1:LINE	3952.78	1.31581	0.173325	7.59159	3.16e-14	4.55491e-12	L1MB2	L1:LINE
L1P3:L1:LINE	317.583	1.30036	0.322458	4.03264	5.51527e-05	0.000843167	L1P3	L1:LINE
L1PA3:L1:LINE	13119.1	1.2754	0.181218	7.03792	1.95126e-12	2.18758e-10	L1PA3	L1:LINE
L1PA16:L1:LINE	2809.9	1.09922	0.158417	6.93873	3.9563e-12	3.9919e-10	L1PA16	L1:LINE
L1PREC2:L1:LINE	971.674	1.09425	0.20869	5.24343	1.57623e-07	6.62672e-06	L1PREC2	L1:LINE
L1PA5:L1:LINE	4240.43	1.07344	0.174019	6.16853	6.89298e-10	4.63668e-08	L1PA5	L1:LINE
L1M4b:L1:LINE	809.129	1.02902	0.189763	5.42264	5.87252e-08	2.57625e-06	L1M4b	L1:LINE
L1MA3:L1:LINE	1926.28	1.02895	0.184177	5.58673	2.3138e-08	1.11173e-06	L1MA3	L1:LINE
L1MEg1:L1:LINE	190.989	1.0276	0.338204	3.03842	0.00237825	0.0187473	L1MEg1	L1:LINE
L1P2:L1:LINE	922.462	1.02212	0.256138	3.9905	6.59347e-05	0.000992957	L1P2	L1:LINE
L1PA4:L1:LINE	5125.26	1.02173	0.180211	5.66963	1.43108e-08	7.21981e-07	L1PA4	L1:LINE
L1PA14:L1:LINE	519.695	1.00441	0.30504	3.29273	0.000992211	0.00991229	L1PA14	L1:LINE
L1HS:L1:LINE	5370.48	1.00352	0.18129	5.53544	3.10446e-08	1.42382e-06	L1HS	L1:LINE
Tigger5:TcMar-Tigger:DNA	182.442	1.55299	0.446109	3.48118	0.000499204	0.00565951	Tigger5	TcMar-Tigger:DNA	182.442
