# Supplementary material for: The domesticated transposon protein L1TD1 associates with its ancestor L1 ORF1p to promote LINE-1 retrotransposition
Source: eLife. 2025 Mar 20;13:RP96850. doi: 10.7554/eLife.96850 (PMC11925450; doi:10.7554/eLife.96850)
Supplement: Supplementary file 4. [file elife-96850-supp4.xlsx]

## Sheet: Info
Operator: Natascha Hartl, Dorothea Anrather
Raw Files:
20211001_Eclipse_None_Kavaklioglu_Seiser_extuni_MPL_TMT6_pool1.raw
20211001_Eclipse_None_Kavaklioglu_Seiser_extuni_MPL_TMT6_pool2.raw
20211001_Eclipse_None_Kavaklioglu_Seiser_extuni_MPL_TMT6_pool3.raw
20211001_Eclipse_None_Kavaklioglu_Seiser_extuni_MPL_TMT6_pool4.raw
20211001_Eclipse_None_Kavaklioglu_Seiser_extuni_MPL_TMT6_pool5.raw
20211001_Eclipse_None_Kavaklioglu_Seiser_extuni_MPL_TMT6_pool6.raw
20211001_Eclipse_None_Kavaklioglu_Seiser_extuni_MPL_TMT6_pool7.raw
20211001_Eclipse_None_Kavaklioglu_Seiser_extuni_MPL_TMT6_pool8.raw
20211001_Eclipse_None_Kavaklioglu_Seiser_extuni_MPL_TMT6_pool9.raw
20211001_Eclipse_None_Kavaklioglu_Seiser_extuni_MPL_TMT6_pool10.raw
Data processing
MaxQuant 1.6.17.0, UniProt human reference database + contaminants.
Reporter ion MS3 of TMT6plex, tryptic specificity allowing 2 missed cleavages, oxidation(M), deamidation (N,Q) and acetylation on protein N-term as variable, and carbamidomethylation (C) as fixed modification, all data filtered at 1% PSM+protein+site FDR
Reverse hits, entries only identified by site, non-human contaminants were removed. Reporter ion intensities were normalized separately per channel by the median.
Proteins included in the statistical analysis using the LIMMA package had to have at least 2 razor & unique peptides, and >5 reporter intensity counts in 1 sample group (set C or set D).
For visualization and data inspection Perseus 1.6.7.0 was used.
Proteins showing regulation (-0.585< log2 FC > 0.585 corresponding to 1.5 fold change ) and statistical significance with an adj. p-value < 0.05 were analysed in Gprofiler
PRIDE PXD047402

## Sheet: Final_matrix_9460entries
																		Median norm. TMT intensities						LIMMA						Quality filter					Regulation
Protein IDs	Majority protein IDs	Protein names	Gene names	Fasta headers	Reporter intensity corrected 1	Reporter intensity corrected 2	Reporter intensity corrected 3	Reporter intensity corrected 4	Reporter intensity corrected 5	Reporter intensity corrected 6	Reporter intensity 1	Reporter intensity 2	Reporter intensity 3	Reporter intensity 4	Reporter intensity 5	Reporter intensity 6	Number of proteins	C1	D1	C2	D2	C3	D3	log2 FC (D/C)	- log10 P.Value	- log10 adj.P.Val	AveExpr	t	B	Only identified by site	Contaminants (non human)	Potential contaminant (human)	>5 reporter intensity counts in at least 1 group	Razor + unique peptides	UP in DKO	DOWN in DKO	Unique + razor sequence coverage [%]	Peptides	Unique peptides	Sequence coverage [%]	Unique sequence coverage [%]	Mol. weight [kDa]	Q-value	Score	Intensity	MS/MS count	Sequence length	Reporter intensity count 1	Reporter intensity count 2
Q02539	Q02539	Histone H1.1	HIST1H1A	sp|Q02539|H11_HUMAN Histone H1.1 OS=Homo sapiens (Human) OX=9606 GN=H1-1 PE=1 SV=3	2591700	0	2608100	760.36	1962300	9618.4	2442000	32737	2465300	31972	1858200	36116	1	21.3277	NaN	21.3547	9.58626	20.8117	13.1619	-9.79062	4.61798	3.59378	17.2485	-10.6368	3.17883				keep	6		down	27	9	6	36.7	27	21.842	0	9.2472	6132100000	8	215	5	0
Q5T7N2	Q5T7N2	LINE-1 type transposase domain-containing protein 1	L1TD1	sp|Q5T7N2|LITD1_HUMAN LINE-1 type transposase domain-containing protein 1 OS=Homo sapiens (Human) OX=9606 GN=L1TD1 PE=1 SV=1	5137000	32519	5213000	26677	5395900	83437	4840700	155560	4934600	150010	5118300	163210	1	22.3147	15.0729	22.3538	14.719	22.271	16.2788	-6.95627	7.04624	5.0804	18.835	-19.9966	8.83484				keep	24		down	30.4	24	23	30.4	29.2	98.848	0	95.297	2108100000	25	865	25	5
O95521;O60811;Q5SWL7;Q5VWM6;A6NFR9;O60809;Q5VTA0;Q5VWM3;Q5SWL8;A0A1W2PPB9;A0A0G2JMD5;A0A140TA27	O95521;O60811;Q5SWL7;Q5VWM6;A6NFR9	PRAME family member 1;PRAME family member 2;PRAME family member 14;PRAME family member 13	PRAMEF1;PRAMEF2;PRAMEF14;PRAMEF13	sp|O95521|PRAM1_HUMAN PRAME family member 1 OS=Homo sapiens (Human) OX=9606 GN=PRAMEF1 PE=2 SV=3;sp|O60811|PRAM2_HUMAN PRAME family member 2 OS=Homo sapiens (Human) OX=9606 GN=PRAMEF2 PE=2 SV=2;sp|Q5SWL7|PRA14_HUMAN PRAME family member 14 OS=Homo sapiens (	50771	684.07	52576	1081.2	56844	2161.4	47852	3140.9	49952	4246.2	54090	3241.8	12	15.6539	9.50189	15.7223	10.0941	15.7023	11.0081	-5.49147	6.52724	4.81531	12.9471	-16.9967	7.60487				keep	3		down	6.8	3	3	6.8	6.8	55.148	0	7.3928	12716000	3	474	3	1
P54652	P54652	Heat shock-related 70 kDa protein 2	HSPA2	sp|P54652|HSP72_HUMAN Heat shock-related 70 kDa protein 2 OS=Homo sapiens (Human) OX=9606 GN=HSPA2 PE=1 SV=1	544890	13785	598720	14615	688640	43872	513620	49610	569610	54959	655820	57661	1	19.0778	13.8347	19.2317	13.8509	19.301	15.3514	-4.85783	5.68825	4.30715	16.7746	-13.0276	5.55444				keep	5		down	8.6	13	5	20.7	8.6	70.02	0	11.513	1476500000	7	639	7	6
Q96BQ3;A6NCK2	Q96BQ3;A6NCK2	Tripartite motif-containing protein 43;Tripartite motif-containing protein 43B	TRIM43;TRIM43B	sp|Q96BQ3|TRI43_HUMAN Tripartite motif-containing protein 43 OS=Homo sapiens (Human) OX=9606 GN=TRIM43 PE=1 SV=1;sp|A6NCK2|TR43B_HUMAN Tripartite motif-containing protein 43B OS=Homo sapiens (Human) OX=9606 GN=TRIM43B PE=3 SV=3	150860	5852.7	157810	6614.7	165220	14942	142220	15782	150340	16968	157610	17992	2	17.2251	12.5988	17.308	12.7072	17.2416	13.7975	-4.22373	6.11238	4.55909	15.1464	-14.909	6.59797				keep	3		down	7.2	3	3	7.2	7.2	52.265	0	6.9163	62960000	3	446	3	3
Q9HCE3;K7EQN0	Q9HCE3	Zinc finger protein 532	ZNF532	sp|Q9HCE3|ZN532_HUMAN Zinc finger protein 532 OS=Homo sapiens (Human) OX=9606 GN=ZNF532 PE=1 SV=2	376150	18582	375050	12914	374670	32935	354610	41319	357500	34906	357260	39525	2	18.5432	14.2655	18.5569	13.6724	18.4228	14.9377	-4.21577	6.23508	4.62525	16.3998	-15.4996	6.89742				keep	10		down	9.4	10	10	9.4	9.4	141.69	0	18.778	115330000	11	1301	10	6
O43790;Q14533;A0A087X106;CON__sp|O43790|KRT86_HUMAN;CON__sp|Q14533|KRT81_HUMAN;P78386;CON__sp|P78386|KRT85_HUMAN;F5GYI5;CON__sp|P02539|K2M1_SHEEP	O43790;Q14533;A0A087X106;CON__sp|O43790|KRT86_HUMAN;CON__sp|Q14533|KRT81_HUMAN;P78386;CON__sp|P78386|KRT85_HUMAN	Keratin, type II cuticular Hb6;Keratin, type II cuticular Hb1;Keratin, type II cuticular Hb5	KRT86;KRT81;KRT85	sp|O43790|KRT86_HUMAN Keratin, type II cuticular Hb6 OS=Homo sapiens (Human) OX=9606 GN=KRT86 PE=1 SV=1;sp|Q14533|KRT81_HUMAN Keratin, type II cuticular Hb1 OS=Homo sapiens (Human) OX=9606 GN=KRT81 PE=1 SV=3;tr|A0A087X106|A0A087X106_HUMAN Isoform of Q14533	396350	2377.8	57085	14343	158950	18910	373490	9686.3	53524	20096	152070	21580	9	18.6186	11.2993	15.841	13.8238	17.1858	14.1372	-4.12837	2.72763	2.20699	15.151	-4.68638	-1.89295			+	keep	2		down	4.1	7	1	14.2	2.5	53.5	0.00024278	2.9132	4910600	2	486	2	1
E9PK69;P0CI25;A6NDI0	E9PK69;P0CI25;A6NDI0	Tripartite motif-containing protein 49;Putative tripartite motif-containing protein 49B	TRIM49;TRIM49B	tr|E9PK69|E9PK69_HUMAN Isoform of P0CI25, Tripartite motif-containing protein 49 OS=Homo sapiens (Human) OX=9606 GN=TRIM49 PE=4 SV=2;sp|P0CI25|TRI49_HUMAN Tripartite motif-containing protein 49 OS=Homo sapiens (Human) OX=9606 GN=TRIM49 PE=1 SV=1;sp|A6NDI0|	109910	4418.8	105730	5514.2	106420	13517	103610	10267	100750	10848	101690	15254	3	16.7682	12.1933	16.7302	12.4446	16.607	13.6529	-3.9382	5.38091	4.10846	14.7327	-11.8031	4.78994				keep	3		down	10.4	3	1	10.4	2.7	43.521	0	11.699	49153000	5	375	5	3
Q14525;CON__sp|Q14525|KT33B_HUMAN	Q14525;CON__sp|Q14525|KT33B_HUMAN	Keratin, type I cuticular Ha3-II	KRT33B	sp|Q14525|KT33B_HUMAN Keratin, type I cuticular Ha3-II OS=Homo sapiens (Human) OX=9606 GN=KRT33B PE=1 SV=3;	78725	1166.4	11599	5275.5	54267	6427.8	74204	5735.3	11173	6904	51934	7340.9	2	16.2868	10.2717	13.5419	12.3808	15.6354	12.5805	-3.41037	2.46008	2.00374	13.4495	-4.2007	-2.56058			+	keep	2		down	5.9	5	2	13.1	5.9	46.213	0.00024346	2.9515	23812000	2	404	2	2
P10696;P05187;P09923	P10696;P05187	Alkaline phosphatase, placental-like;Alkaline phosphatase, placental type	ALPPL2;ALPP	sp|P10696|PPBN_HUMAN Alkaline phosphatase, germ cell type OS=Homo sapiens (Human) OX=9606 GN=ALPG PE=2 SV=4;sp|P05187|PPB1_HUMAN Alkaline phosphatase, placental type OS=Homo sapiens (Human) OX=9606 GN=ALPP PE=1 SV=2	674530	58554	701290	56858	718430	83673	636000	97262	670350	98889	686950	95598	3	19.3858	15.9214	19.4598	15.8108	19.3621	16.2828	-3.39757	8.33161	5.4389	17.7038	-29.8194	11.6917				keep	11		down	26.7	11	11	26.7	26.7	57.376	0	46.412	277010000	13	532	12	8
P16422;B5MCA4;C9JKY3	P16422;B5MCA4;C9JKY3	Epithelial cell adhesion molecule	EPCAM	sp|P16422|EPCAM_HUMAN Epithelial cell adhesion molecule OS=Homo sapiens (Human) OX=9606 GN=EPCAM PE=1 SV=2;tr|B5MCA4|B5MCA4_HUMAN Isoform of P16422, Thyroglobulin type-1 domain-containing protein OS=Homo sapiens (Human) OX=9606 GN=EPCAM PE=1 SV=1;tr|C9JKY3	893110	85767	910480	113750	977970	141150	842160	140860	871840	170100	937410	156130	3	19.7907	16.472	19.8364	16.8112	19.807	17.0372	-3.0379	7.61618	5.23284	18.2924	-23.8872	10.1424				keep	3		down	18.5	3	3	18.5	18.5	34.932	0	12.38	188930000	4	314	3	3
P08962;F8VV56;F8W022;F8VWK8;P08962-3;P08962-2;F8VNT9	P08962;F8VV56;F8W022;F8VWK8;P08962-3;P08962-2	CD63 antigen;Tetraspanin	CD63	sp|P08962|CD63_HUMAN CD63 antigen OS=Homo sapiens (Human) OX=9606 GN=CD63 PE=1 SV=2;tr|F8VV56|F8VV56_HUMAN Isoform of P08962, CD63 antigen OS=Homo sapiens (Human) OX=9606 GN=CD63 PE=1 SV=1;tr|F8W022|F8W022_HUMAN Isoform of P08962, Tetraspanin (Fragment) OS	191180	19480	185800	25453	211030	35844	180280	31104	178080	37147	202470	38761	7	17.5668	14.3336	17.5436	14.6513	17.5947	15.0598	-2.8868	6.73049	4.91721	16.125	-18.1207	8.09248				keep	3		down	18.5	3	3	18.5	18.5	25.636	0	44.259	129440000	3	238	3	3
O95436-2;D6RA94	O95436-2;D6RA94	Sodium-dependent phosphate transport protein 2B	SLC34A2	sp|O95436-2|NPT2B-2_HUMAN Isoform of O95436, Isoform 2 of Sodium-dependent phosphate transport protein 2B OS=Homo sapiens (Human) OX=9606 GN=SLC34A2 PE=2 SV=3;tr|D6RA94|D6RA94_HUMAN Isoform of O95436, Sodium-dependent phosphate transport protein 2B (Fragme	46261	4889.3	50894	7423.3	50000	7948.8	43624	7752.2	48757	10391	48010	8671.9	2	15.5197	12.3393	15.6754	12.8736	15.5172	12.8869	-2.87083	7.05453	5.0804	14.1354	-20.0482	8.85415				keep	2		down	3	2	1	3	1.3	75.656	0	4.9467	19117000	2	689	2	2
O76009;CON__sp|O76009|KT33A_HUMAN	O76009;CON__sp|O76009|KT33A_HUMAN	Keratin, type I cuticular Ha3-I	KRT33A	sp|O76009|KT33A_HUMAN Keratin, type I cuticular Ha3-I OS=Homo sapiens (Human) OX=9606 GN=KRT33A PE=2 SV=2;	10238	3286.7	38876	6007.5	121680	6778	9664.7	4060.7	37221	10477	116000	9271.3	2	13.3439	11.7663	15.2868	12.5683	16.8003	12.657	-2.81313	2.16672	1.77452	13.7371	-3.69733	-3.28678			+	keep	2		down	6.2	6	0	16.1	0	45.94	0	7.1582	24614000	2	404	2	2
A0A590UJ46	A0A590UJ46		GNAS	tr|A0A590UJ46|A0A590UJ46_HUMAN Isoform of Q5JWF2, Guanine nucleotide-binding protein G(s) subunit alpha isoforms short OS=Homo sapiens (Human) OX=9606 GN=GNAS PE=4 SV=1	151450	21953	143590	18891	160760	27238	142850	30686	138040	27550	154220	29464	1	17.2307	14.506	17.1718	14.2211	17.2021	14.6637	-2.73793	7.93554	5.29158	15.8326	-26.3648	10.8448				keep	2		down	7	2	2	7	7	30.854	0.00024307	2.9306	49028000	2	285	2	2
A0A087WVU4;A0A087WZJ2;Q6P3W6;P0DPF3;A0A087WYQ9;A0A075B757;A0A087WZE1;A0A087WVC7;Q6P3W6-2;A0A075B7A3;A0A087WTW4;A0A075B762;B4DH59;Q3BBV2;A0A075B6G5;A0A494C053;A0A087WUL8;A0A087WZB6;A0A075B7F9;Q5TI25;A0A087WWQ1;P0DPF3-2;Q8N660;A0A087X002;A0A075B764;A0A087WVG0;A0A087WY24;A0A087X288;A0A087WYI5;A0A087WVE3;Q5TAG4;Q3BBV0;A0A087WU30;A0A087WZS8;H7BZX4;Q3BBV0-2;A0A087WTH4;A0A087WVG8;A0A087WUW2;Q86T75;A0A08…	A0A087WVU4;A0A087WZJ2;Q6P3W6;P0DPF3;A0A087WYQ9;A0A075B757;A0A087WZE1;A0A087WVC7;Q6P3W6-2;A0A075B7A3;A0A087WTW4;A0A075B762;B4DH59;Q3BBV2;A0A075B6G5;A0A494C053;A0A087WUL8;A0A087WZB6;A0A075B7F9;Q5TI25;A0A087WWQ1;P0DPF3-2;Q8N660;A0A087X002	Neuroblastoma breakpoint family member 10;Neuroblastoma breakpoint family member 26;Putative neuroblastoma breakpoint family member 8;Neuroblastoma breakpoint family member 14;Neuroblastoma breakpoint family member 15	NBPF14;NBPF10;NBPF9;NBPF8;NBPF26;NBPF19;NBPF15;NOTCH2NL	tr|A0A087WVU4|A0A087WVU4_HUMAN Isoform of Q5TI25, Neuroblastoma breakpoint family member 14 OS=Homo sapiens (Human) OX=9606 GN=NBPF14 PE=4 SV=1;tr|A0A087WZJ2|A0A087WZJ2_HUMAN Isoform of Q5TI25, Neuroblastoma breakpoint family member 14 OS=Homo sapiens (Hum	895980	132920	951630	150250	978570	224210	845090	185020	914460	206420	941900	234350	47	19.7953	17.1041	19.9002	17.2127	19.8079	17.7049	-2.4939	6.60555	4.84466	18.5875	-17.4172	7.79136				keep	11		down	45.1	11	1	45.1	3.6	343.24	0	69.755	584270000	14	2988	12	11
P56747	P56747	Claudin-6	CLDN6	sp|P56747|CLD6_HUMAN Claudin-6 OS=Homo sapiens (Human) OX=9606 GN=CLDN6 PE=1 SV=2	412360	59875	411200	80451	422310	94619	388930	83856	395540	103850	407020	99122	1	18.6758	15.9536	18.6896	16.3115	18.5955	16.4602	-2.41187	7.0846	5.08302	17.4477	-20.2384	8.92467				keep	3		down	13.6	4	3	20.9	13.6	23.291	0	7.2489	1117000000	5	220	5	5
Q16352;P07197;E7EMV2;E7ESP9	Q16352	Alpha-internexin	INA	sp|Q16352|AINX_HUMAN Alpha-internexin OS=Homo sapiens (Human) OX=9606 GN=INA PE=1 SV=2	785770	150140	804490	151190	883100	194320	741300	193640	775810	198840	850370	203940	4	19.606	17.2798	19.6579	17.2217	19.6598	17.4984	-2.30793	8.4318	5.4389	18.4873	-30.7654	11.9006				keep	10		down	21.2	11	10	23	21.2	55.39	0	21.364	371460000	12	499	11	11
Q8N5C1	Q8N5C1	Protein FAM26E	FAM26E	sp|Q8N5C1|CAHM5_HUMAN Calcium homeostasis modulator protein 5 OS=Homo sapiens (Human) OX=9606 GN=CALHM5 PE=2 SV=1	77892	18822	84570	20273	89207	23893	73501	22919	81816	24952	86223	24616	1	16.2714	14.284	16.408	14.323	16.3524	14.4747	-1.98337	8.37059	5.4389	15.3522	-30.179	11.7722				keep	2		down	7.4	2	2	7.4	7.4	35.17	0.00024358	2.9574	31441000	2	309	2	2
Q5T481	Q5T481	RNA-binding protein 20	RBM20	sp|Q5T481|RBM20_HUMAN RNA-binding protein 20 OS=Homo sapiens (Human) OX=9606 GN=RBM20 PE=1 SV=3	340200	82974	355860	87548	387210	104160	321030	100560	344540	107290	374250	107200	1	18.3983	16.4243	18.4811	16.4335	18.4703	16.5988	-1.96437	8.56703	5.4389	17.4677	-32.0796	12.1762				keep	8		down	10.9	8	8	10.9	10.9	134.36	0	30.068	160930000	9	1227	8	7
P08727;CON__sp|P08727|K1C19_HUMAN;K7EMS3;C9JM50;CON__sp|P19001|K1C19_MOUSE	P08727;CON__sp|P08727|K1C19_HUMAN;K7EMS3	Keratin, type I cytoskeletal 19	KRT19	sp|P08727|K1C19_HUMAN Keratin, type I cytoskeletal 19 OS=Homo sapiens (Human) OX=9606 GN=KRT19 PE=1 SV=4;;tr|K7EMS3|K7EMS3_HUMAN Isoform of P08727, IF rod domain-containing protein (Fragment) OS=Homo sapiens (Human) OX=9606 GN=KRT19 PE=1 SV=1	309190	93460	339950	81487	366910	90400	291850	108510	329990	100510	354320	93834	5	18.2604	16.5959	18.4151	16.33	18.3926	16.3944	-1.91593	7.64016	5.23284	17.3981	-24.0601	10.1943			+	keep	7		down	17.5	11	7	27	17.5	44.105	0	16.335	312430000	8	400	8	8
P25874	P25874	Mitochondrial brown fat uncoupling protein 1	UCP1	sp|P25874|UCP1_HUMAN Mitochondrial brown fat uncoupling protein 1 OS=Homo sapiens (Human) OX=9606 GN=UCP1 PE=1 SV=3	166970	43914	173740	48567	184180	53582	157580	52379	168520	57833	178400	54827	1	17.3715	15.5063	17.4467	15.5834	17.3983	15.6398	-1.829	8.85078	5.4389	16.491	-35.0021	12.7346				keep	4		down	16	4	4	16	16	33.004	0	5.4869	53377000	4	307	4	4
P78540	P78540	Arginase-2, mitochondrial	ARG2	sp|P78540|ARGI2_HUMAN Arginase-2, mitochondrial OS=Homo sapiens (Human) OX=9606 GN=ARG2 PE=1 SV=1	477530	125750	478370	119080	476730	163140	450660	149760	464060	144340	462260	164830	1	18.8875	17.0241	18.9079	16.8773	18.7704	17.2461	-1.8061	6.92812	5.02826	17.9522	-19.265	8.55522				keep	7		down	28.8	7	7	28.8	28.8	38.577	0	35.92	321650000	8	354	6	6
Q7Z6K5-2;A0A0A6YYH1;Q7Z6K5	Q7Z6K5-2;A0A0A6YYH1;Q7Z6K5	Arpin	ARPIN;C15orf38-AP3S2	sp|Q7Z6K5-2|ARPIN-2_HUMAN Isoform of Q7Z6K5, Isoform C15orf38-AP3S2 of Arpin OS=Homo sapiens (Human) OX=9606 GN=ARPIN PE=1 SV=1;tr|A0A0A6YYH1|A0A0A6YYH1_HUMAN C15orf38-AP3S2 readthrough, Clat_adaptor_s domain-containing protein OS=Homo sapiens (Human) OX=9	291960	84840	321270	96752	380450	115280	275570	99284	311960	114600	368520	117580	3	18.1776	16.4563	18.3336	16.5777	18.4449	16.7451	-1.72567	6.81248	4.96257	17.4559	-18.5817	8.2828				keep	7		down	23.1	7	5	23.1	15.2	43.881	0	57.91	111110000	7	394	7	7
Q99608	Q99608	Necdin	NDN	sp|Q99608|NECD_HUMAN Necdin OS=Homo sapiens (Human) OX=9606 GN=NDN PE=1 SV=1	326720	117260	376180	104340	418870	111810	308480	132090	366250	124970	405200	115220	1	18.3399	16.9232	18.5612	16.6866	18.5837	16.701	-1.72467	6.92445	5.02826	17.6326	-19.2398	8.54536				keep	4		down	17.4	4	4	17.4	17.4	36.085	0	7.8878	279550000	6	321	6	6
Q9P2H3-3;H3BRJ5;Q8IWR1;F5GZP3;Q9P2H3;Q9P2H3-2;C9J9F0;C9IZE0;C9J614;C9IY67;C9JE08;H7C5M3;C9JUJ1;H7C4K6;C9J6I5;C9JSB1;C9J6G8;C9IZR2	Q9P2H3-3;H3BRJ5;Q8IWR1;F5GZP3	Intraflagellar transport protein 80 homolog;Tripartite motif-containing protein 59	IFT80;TRIM59	sp|Q9P2H3-3|IFT80-3_HUMAN Isoform of Q9P2H3, Isoform IFT80-L of Intraflagellar transport protein 80 homolog OS=Homo sapiens (Human) OX=9606 GN=IFT80 PE=1 SV=3;tr|H3BRJ5|H3BRJ5_HUMAN ENSG00000248710 readthrough, Uncharacterized protein OS=Homo sapiens (Huma	145190	42659	151250	41234	147970	49370	137040	48166	146900	48560	143610	49610	18	17.1698	15.4644	17.2467	15.3473	17.0825	15.5217	-1.72187	7.92812	5.29158	16.3054	-26.3182	10.8324				keep	7		down	11.6	7	7	11.6	11.6	123.32	0	26.945	112820000	7	1080	7	5
O43291;K7EM91;O43291-2;K7ES27;K7ESI5;K7EQZ3;K7EKQ0	O43291;K7EM91;O43291-2	Kunitz-type protease inhibitor 2	SPINT2	sp|O43291|SPIT2_HUMAN Kunitz-type protease inhibitor 2 OS=Homo sapiens (Human) OX=9606 GN=SPINT2 PE=1 SV=2;tr|K7EM91|K7EM91_HUMAN Isoform of O43291, Kunitz-type protease inhibitor 2 OS=Homo sapiens (Human) OX=9606 GN=SPINT2 PE=1 SV=1;sp|O43291-2|SPIT2-2_HU	145980	40881	128710	38292	131730	45847	137780	47873	125410	44916	127960	46298	7	17.1776	15.403	17.0139	15.2405	16.9148	15.4149	-1.68263	7.18376	5.11295	16.1941	-20.8742	9.15497				keep	3		down	13.1	3	3	13.1	13.1	28.228	0	10.432	168140000	3	252	3	3
Q9NYQ6;Q9NYQ6-2;H0Y7R9	Q9NYQ6;Q9NYQ6-2;H0Y7R9	Cadherin EGF LAG seven-pass G-type receptor 1	CELSR1	sp|Q9NYQ6|CELR1_HUMAN Cadherin EGF LAG seven-pass G-type receptor 1 OS=Homo sapiens (Human) OX=9606 GN=CELSR1 PE=1 SV=1;sp|Q9NYQ6-2|CELR1-2_HUMAN Isoform of Q9NYQ6, Isoform 2 of Cadherin EGF LAG seven-pass G-type receptor 1 OS=Homo sapiens (Human) OX=9606	6436.5	1479	6789.5	1956.6	6339.3	3083.9	6073.3	1738.8	6571.6	2171.3	6189	2994.2	3	12.6743	10.6143	12.7693	10.9499	12.5377	11.5209	-1.63207	4.20482	3.29534	11.8444	-8.01309	1.83451				keep	2		down	1.3	2	2	1.3	1.3	329.48	0	13.64	7486600	2	3014	2	1
P24385;F5H437	P24385	G1/S-specific cyclin-D1	CCND1	sp|P24385|CCND1_HUMAN G1/S-specific cyclin-D1 OS=Homo sapiens (Human) OX=9606 GN=CCND1 PE=1 SV=1	591770	216630	672180	207860	844460	262860	558760	243130	655230	246220	817930	267560	2	19.1969	17.8088	19.3987	17.681	19.5952	17.9343	-1.5889	6.08092	4.5391	18.6025	-14.7602	6.52057				keep	5		down	19	5	5	19	19	33.729	0	15.801	165040000	6	295	6	6
P51854;P51854-4;P51854-1;F8WF97;H0Y808;A2ID95	P51854;P51854-4;P51854-1	Transketolase-like protein 1	TKTL1	sp|P51854|TKTL1_HUMAN Transketolase-like protein 1 OS=Homo sapiens (Human) OX=9606 GN=TKTL1 PE=1 SV=2;sp|P51854-4|TKTL1-4_HUMAN Isoform of P51854, Isoform 4 of Transketolase-like protein 1 OS=Homo sapiens (Human) OX=9606 GN=TKTL1 PE=1 SV=2;sp|P51854-1|TKTL	519230	167760	545920	173490	632550	218740	490160	192050	531720	202980	614030	220990	6	19.0082	17.4399	19.0985	17.4202	19.1784	17.6692	-1.58527	7.02365	5.0804	18.3024	-19.8563	8.78216				keep	8		down	18	8	8	18	18	65.333	0	58.013	399180000	10	596	8	8
P30279;A0A3B3IT44;P30279-2;H0YGD4	P30279;A0A3B3IT44;P30279-2	G1/S-specific cyclin-D2	CCND2	sp|P30279|CCND2_HUMAN G1/S-specific cyclin-D2 OS=Homo sapiens (Human) OX=9606 GN=CCND2 PE=1 SV=1;tr|A0A3B3IT44|A0A3B3IT44_HUMAN ENSG00000285901 readthrough, Cyclin N-terminal domain-containing protein OS=Homo sapiens (Human) OX=9606 GN=ENSG00000285901 PE=3	258390	82060	264030	90870	307400	102920	243910	94162	257330	104790	298550	104210	4	18.0014	16.4083	18.0505	16.4872	18.1373	16.5815	-1.57073	7.80134	5.23284	17.2777	-25.3019	10.5543				keep	7		down	30.1	7	6	30.1	25.6	33.067	0	14.193	275860000	6	289	6	6
Q92536;H3BSB6;H3BPV6;H3BUR2;H3BUA4;H3BNF5;E7EPZ8	Q92536;H3BSB6;H3BPV6;H3BUR2;H3BUA4;H3BNF5;E7EPZ8	Y+L amino acid transporter 2	SLC7A6	sp|Q92536|YLAT2_HUMAN Y+L amino acid transporter 2 OS=Homo sapiens (Human) OX=9606 GN=SLC7A6 PE=1 SV=3;tr|H3BSB6|H3BSB6_HUMAN Isoform of Q92536, Y+L amino acid transporter 2 (Fragment) OS=Homo sapiens (Human) OX=9606 GN=SLC7A6 PE=1 SV=1;tr|H3BPV6|H3BPV6_HU	69009	15003	65742	15731	25976	19053	65112	18650	63624	18217	25853	18557	7	16.0967	13.9569	16.0447	13.957	14.5725	14.1481	-1.55063	2.45241	1.99784	14.796	-4.18717	-2.57966				keep	2		down	8.7	2	2	8.7	8.7	56.827	0.0038362	1.8389	73120000	3	515	3	3
P22492	P22492	Histone H1t	HIST1H1T	sp|P22492|H1T_HUMAN Histone H1t OS=Homo sapiens (Human) OX=9606 GN=HIST1H1T PE=2 SV=4	886950	296940	925790	281080	805040	307550	837340	337660	902270	324580	784680	308710	1	19.7807	18.2637	19.8605	18.1163	19.5263	18.1608	-1.54223	6.55129	4.82974	18.9514	-17.1228	7.66132				keep	4		down	19.3	7	4	29.5	19.3	22.019	0	10.635	114870000	8	207	8	8
O15551;O14493;O95484	O15551	Claudin-3	CLDN3	sp|O15551|CLD3_HUMAN Claudin-3 OS=Homo sapiens (Human) OX=9606 GN=CLDN3 PE=1 SV=1	140960	42497	143360	53937	152490	54965	133060	49245	139670	60857	148560	55377	3	17.1271	15.459	17.1695	15.7347	17.1259	15.6766	-1.5174	7.10735	5.08991	16.3821	-20.3827	8.97768				keep	4		down	19.5	4	3	19.5	12.3	23.318	0	21.343	86670000	4	220	4	4
Q01844;B0QYK0;Q01844-6;Q01844-3;Q01844-5;A0A0D9SFL3;C9JGE3;Q01844-2;Q01844-4	Q01844;B0QYK0;Q01844-6;Q01844-3;Q01844-5;A0A0D9SFL3;C9JGE3;Q01844-2	RNA-binding protein EWS	EWSR1	sp|Q01844|EWS_HUMAN RNA-binding protein EWS OS=Homo sapiens (Human) OX=9606 GN=EWSR1 PE=1 SV=1;tr|B0QYK0|B0QYK0_HUMAN Isoform of Q01844, RNA-binding protein EWS OS=Homo sapiens (Human) OX=9606 GN=EWSR1 PE=1 SV=1;sp|Q01844-6|EWS-6_HUMAN Isoform of Q01844, I	53587	13870	74766	13311	23427	21050	50571	16705	72084	16226	23398	20377	9	15.7318	13.8436	16.2303	13.7161	14.4235	14.2919	-1.51133	2.12871	1.74545	14.7062	-3.63406	-3.38032				keep	2		down	6.6	7	2	14.3	6.6	68.477	0	65.483	94930000	4	656	4	3
H7BY16	H7BY16		NCL	tr|H7BY16|H7BY16_HUMAN Isoform of P19338, Nucleolin (Fragment) OS=Homo sapiens (Human) OX=9606 GN=NCL PE=1 SV=8	570800	144220	573140	151260	274310	180020	538650	173340	555740	173460	271790	176030	1	19.1449	17.2218	19.1687	17.2224	17.973	17.3882	-1.48473	2.91746	2.34658	18.0198	-5.04867	-1.41695				keep	3		down	9.8	13	3	51	9.8	32.389	0	5.6223	82761000	3	296	3	3
Q9H9Z2	Q9H9Z2	Protein lin-28 homolog A	LIN28A	sp|Q9H9Z2|LN28A_HUMAN Protein lin-28 homolog A OS=Homo sapiens (Human) OX=9606 GN=LIN28A PE=1 SV=1	1767900	616160	1986200	705350	2180800	802140	1669100	697170	1936000	805400	2122500	807080	1	20.7758	19.3168	20.9617	19.4437	20.964	19.5439	-1.4657	6.85387	4.99568	20.1676	-18.837	8.38589				keep	9		down	56.5	10	9	62.2	56.5	22.743	0	57.467	1932200000	11	209	6	6
P28330	P28330	Long-chain specific acyl-CoA dehydrogenase, mitochondrial	ACADL	sp|P28330|ACADL_HUMAN Long-chain specific acyl-CoA dehydrogenase, mitochondrial OS=Homo sapiens (Human) OX=9606 GN=ACADL PE=1 SV=2	138440	44813	139810	50212	144740	60614	130690	51223	136380	56998	141230	60511	1	17.1011	15.5355	17.1333	15.6315	17.0507	15.8177	-1.43347	6.8962	5.01502	16.3783	-19.078	8.48178				keep	3		down	8.4	3	3	8.4	8.4	47.655	0	7.0085	77966000	3	430	3	3
P13646;P13646-3;K7ERE3;CON__sp|P13646|K1C13_HUMAN;P13646-2;K7EMD9	P13646;P13646-3;K7ERE3;CON__sp|P13646|K1C13_HUMAN;P13646-2;K7EMD9	Keratin, type I cytoskeletal 13	KRT13	sp|P13646|K1C13_HUMAN Keratin, type I cytoskeletal 13 OS=Homo sapiens (Human) OX=9606 GN=KRT13 PE=1 SV=4;sp|P13646-3|K1C13-3_HUMAN Isoform of P13646, Isoform 3 of Keratin, type I cytoskeletal 13 OS=Homo sapiens (Human) OX=9606 GN=KRT13 PE=1 SV=4;tr|K7ERE3|	40826	20988	111070	48705	70024	15711	38577	23086	107580	52357	68860	16456	6	15.3394	14.4412	16.8013	15.5875	16.0031	13.8699	-1.41507	1.69	1.39878	15.3404	-2.93008	-4.44748			+	keep	2		down	3.9	6	1	11.1	2	49.588	0.00024369	2.9682	20386000	2	458	2	2
Q9UJC3;Q9UJC3-2	Q9UJC3;Q9UJC3-2	Protein Hook homolog 1	HOOK1	sp|Q9UJC3|HOOK1_HUMAN Protein Hook homolog 1 OS=Homo sapiens (Human) OX=9606 GN=HOOK1 PE=1 SV=2;sp|Q9UJC3-2|HOOK1-2_HUMAN Isoform of Q9UJC3, Isoform 2 of Protein Hook homolog 1 OS=Homo sapiens (Human) OX=9606 GN=HOOK1 PE=1 SV=2	365250	144930	392820	144470	483750	168430	344930	160300	384430	165400	470080	170080	2	18.5008	17.2289	18.6237	17.1561	18.7915	17.2922	-1.41293	6.67778	4.89279	17.9322	-17.8174	7.96429				keep	7		down	12.8	7	7	12.8	12.8	84.647	0	29.393	139640000	7	728	7	7
Q5M775;Q5M775-4;Q5M775-3;Q5M775-5;Q5M775-2;J3KSG2;J3QQM0;J3KRN9	Q5M775;Q5M775-4;Q5M775-3;Q5M775-5;Q5M775-2	Cytospin-B	SPECC1	sp|Q5M775|CYTSB_HUMAN Cytospin-B OS=Homo sapiens (Human) OX=9606 GN=SPECC1 PE=1 SV=1;sp|Q5M775-4|CYTSB-4_HUMAN Isoform of Q5M775, Isoform 4 of Cytospin-B OS=Homo sapiens (Human) OX=9606 GN=SPECC1 PE=1 SV=1;sp|Q5M775-3|CYTSB-3_HUMAN Isoform of Q5M775, Isofo	843890	298820	882010	321320	910830	360910	796760	336480	861450	363790	888310	361460	8	19.7089	18.2728	19.7906	18.3094	19.7044	18.3916	-1.41003	7.99568	5.29158	19.0296	-26.8862	10.9819				keep	11		down	12.7	11	11	12.7	12.7	118.58	0	66.427	306840000	11	1068	11	11
P17302	P17302	Gap junction alpha-1 protein	GJA1	sp|P17302|CXA1_HUMAN Gap junction alpha-1 protein OS=Homo sapiens (Human) OX=9606 GN=GJA1 PE=1 SV=2	1415600	501210	1438500	529090	1398600	578910	1336500	563960	1405900	595740	1366200	578310	1	20.4552	19.0189	20.4963	19.0289	20.3231	19.0733	-1.3845	7.65561	5.23284	19.7326	-24.1763	10.229				keep	8		down	34.8	8	8	34.8	34.8	43.008	0	71.462	1211000000	9	382	9	9
Q8N5W9	Q8N5W9	Filamin-interacting protein FAM101B	FAM101B	sp|Q8N5W9|RFLB_HUMAN Refilin-B OS=Homo sapiens (Human) OX=9606 GN=RFLNB PE=1 SV=1	374920	139020	376520	144530	420470	159280	354010	155170	368580	163100	409710	159960	1	18.5385	17.1688	18.5625	17.1567	18.5892	17.2116	-1.38437	8.50585	5.4389	17.8712	-31.4706	12.0505				keep	5		down	35	5	5	35	35	22.882	0	36.406	171640000	5	214	5	5
O60437;K7EKI8;K7EQ71	O60437;K7EKI8;K7EQ71	Periplakin	PPL	sp|O60437|PEPL_HUMAN Periplakin OS=Homo sapiens (Human) OX=9606 GN=PPL PE=1 SV=4;tr|K7EKI8|K7EKI8_HUMAN Isoform of O60437, SH3 domain-containing protein OS=Homo sapiens (Human) OX=9606 GN=PPL PE=1 SV=1;tr|K7EQ71|K7EQ71_HUMAN Isoform of O60437, Periplakin (	76738	30850	82481	30834	91757	33909	72470	34051	80753	34937	89355	34108	3	16.2499	14.9969	16.3719	14.9279	16.3931	14.9797	-1.37013	7.78252	5.23284	15.6532	-25.1609	10.5145				keep	3		down	2.2	3	3	2.2	2.2	204.74	0	7.5846	8369000	3	1756	3	3
O75387;O75387-2;E9PJ68	O75387;O75387-2	Large neutral amino acids transporter small subunit 3	SLC43A1	sp|O75387|LAT3_HUMAN Large neutral amino acids transporter small subunit 3 OS=Homo sapiens (Human) OX=9606 GN=SLC43A1 PE=1 SV=1;sp|O75387-2|LAT3-2_HUMAN Isoform of O75387, Isoform 2 of Large neutral amino acids transporter small subunit 3 OS=Homo sapiens (	399960	134470	370340	129420	323010	153790	377600	152300	362180	145980	316400	152480	3	18.6317	17.1208	18.5387	16.9974	18.2088	17.161	-1.36667	5.58503	4.24795	17.7764	-12.6039	5.29832				keep	5		down	9.7	5	5	9.7	9.7	61.476	0	86.008	122140000	5	559	5	5
Q8IVL5;Q8IVL5-2;C9JSL4;C9J313	Q8IVL5;Q8IVL5-2	Prolyl 3-hydroxylase 2	LEPREL1	sp|Q8IVL5|P3H2_HUMAN Prolyl 3-hydroxylase 2 OS=Homo sapiens (Human) OX=9606 GN=P3H2 PE=1 SV=1;sp|Q8IVL5-2|P3H2-2_HUMAN Isoform of Q8IVL5, Isoform 2 of Prolyl 3-hydroxylase 2 OS=Homo sapiens (Human) OX=9606 GN=P3H2 PE=1 SV=1	74919	33004	78949	28012	95422	34290	70765	35919	77488	32227	92738	34554	4	16.2153	15.0942	16.3088	14.7895	16.4496	14.9959	-1.3647	6.09854	4.55129	15.6422	-14.8429	6.56369				keep	4		down	7.2	4	4	7.2	7.2	80.984	0	7.618	17424000000	4	708	4	4
Q9P2J9	Q9P2J9	[Pyruvate dehydrogenase [acetyl-transferring]]-phosphatase 2, mitochondrial	PDP2	sp|Q9P2J9|PDP2_HUMAN [Pyruvate dehydrogenase [acetyl-transferring]]-phosphatase 2, mitochondrial OS=Homo sapiens (Human) OX=9606 GN=PDP2 PE=2 SV=2	24775	10060	26434	8473.9	24833	11209	23397	11085	25869	9745.1	24249	11144	1	14.6188	13.3802	14.7303	13.0645	14.5076	13.3827	-1.3431	5.80967	4.36653	13.9474	-13.5395	5.85297				keep	2		down	9.1	2	2	9.1	9.1	59.977	0	8.1321	16569000	2	529	2	2
P29373;Q5SYZ4	P29373;Q5SYZ4	Cellular retinoic acid-binding protein 2	CRABP2	sp|P29373|RABP2_HUMAN Cellular retinoic acid-binding protein 2 OS=Homo sapiens (Human) OX=9606 GN=CRABP2 PE=1 SV=2;tr|Q5SYZ4|Q5SYZ4_HUMAN Isoform of P29373, FABP domain-containing protein (Fragment) OS=Homo sapiens (Human) OX=9606 GN=CRABP2 PE=1 SV=1	1333100	640640	1399400	511410	1723900	578650	1259400	688870	1377300	586120	1674400	585790	2	20.3686	19.373	20.4565	18.9798	20.6248	19.0727	-1.34147	5.46852	4.16368	19.8126	-12.1413	5.00868				keep	6		down	50	6	6	50	50	15.693	0	24.94	3958300000	16	138	13	13
Q9H4L4;A0A087X0R7;J3QL36;A0A087WV50;J3QRE4;J3KSF5	Q9H4L4;A0A087X0R7;J3QL36	Sentrin-specific protease 3	SENP3;SENP3-EIF4A1	sp|Q9H4L4|SENP3_HUMAN Sentrin-specific protease 3 OS=Homo sapiens (Human) OX=9606 GN=SENP3 PE=1 SV=2;tr|A0A087X0R7|A0A087X0R7_HUMAN SENP3-EIF4A1 readthrough, ULP_PROTEASE domain-containing protein (Fragment) OS=Homo sapiens (Human) OX=9606 GN=SENP3-EIF4A1	1050900	398550	1061100	349810	895450	425200	992300	443280	1038200	397560	876750	421630	6	20.0254	18.6883	20.0573	18.4319	19.6798	18.6281	-1.33807	5.4023	4.11634	19.2518	-11.8857	4.84394				keep	12		down	28.6	12	12	28.6	28.6	65.009	0	53.662	622820000	12	574	12	12
P55085	P55085	Proteinase-activated receptor 2;Proteinase-activated receptor 2, alternate cleaved 1;Proteinase-activated receptor 2, alternate cleaved 2	F2RL1	sp|P55085|PAR2_HUMAN Proteinase-activated receptor 2 OS=Homo sapiens (Human) OX=9606 GN=F2RL1 PE=1 SV=1	27348	8422.7	22540	8098.5	19628	10606	25815	9664.8	22062	8939.5	19273	10453	1	14.7614	13.124	14.5004	12.9992	14.1682	13.303	-1.3346	4.5817	3.56715	13.8094	-9.0897	2.78344				keep	2		down	5.5	2	2	5.5	5.5	44.126	0	5.2821	20344000	2	397	2	2
O00458;O00458-2;E9PMY4;C9JNM6;C9JA65	O00458;O00458-2	Interferon-related developmental regulator 1	IFRD1	sp|O00458|IFRD1_HUMAN Interferon-related developmental regulator 1 OS=Homo sapiens (Human) OX=9606 GN=IFRD1 PE=1 SV=4;sp|O00458-2|IFRD1-2_HUMAN Isoform of O00458, Isoform 2 of Interferon-related developmental regulator 1 OS=Homo sapiens (Human) OX=9606 GN=	141350	62590	166230	61257	186030	68733	133520	68250	162760	69605	181110	69137	5	17.1311	16.0175	17.383	15.9183	17.4128	15.9991	-1.33067	6.451	4.76955	16.6436	-16.5929	7.42092				keep	3		down	8.9	3	3	8.9	8.9	50.268	0	18.378	39498000	3	451	3	3
P49748;P49748-2;P49748-3;G3V1M7;J3QRJ8;J3KSR4;K7EQP4;J3KS89;J3QKU9;K7EJW8;K7EMF8	P49748;P49748-2;P49748-3	Very long-chain specific acyl-CoA dehydrogenase, mitochondrial	ACADVL	sp|P49748|ACADV_HUMAN Very long-chain specific acyl-CoA dehydrogenase, mitochondrial OS=Homo sapiens (Human) OX=9606 GN=ACADVL PE=1 SV=1;sp|P49748-2|ACADV-2_HUMAN Isoform of P49748, Isoform 2 of Very long-chain specific acyl-CoA dehydrogenase, mitochondria	3099700	1136700	3073100	1272200	3363500	1362900	2926800	1270700	3009900	1417000	3284500	1363200	11	21.5859	20.2003	21.5914	20.2946	21.5891	20.3086	-1.32097	8.08145	5.29158	20.9283	-27.5957	11.1628				keep	21		down	42.3	21	21	42.3	42.3	70.389	0	103.9	2575000000	26	655	26	26
Q6DKK2;K7EKH7;K7ERR1;K7EJA1	Q6DKK2	Tetratricopeptide repeat protein 19, mitochondrial	TTC19	sp|Q6DKK2|TTC19_HUMAN Tetratricopeptide repeat protein 19, mitochondrial OS=Homo sapiens (Human) OX=9606 GN=TTC19 PE=1 SV=4	668300	232380	650200	280250	718390	299680	630960	261990	636500	310490	702120	299240	4	19.3724	17.91	19.3507	18.1121	19.362	18.1234	-1.3132	7.06601	5.0804	18.7051	-20.1199	8.88084				keep	10		down	32.4	10	10	32.4	32.4	42.456	0	35.844	501270000	16	380	12	12
P05091;P05091-2;S4R3S4	P05091;P05091-2;S4R3S4	Aldehyde dehydrogenase, mitochondrial	ALDH2	sp|P05091|ALDH2_HUMAN Aldehyde dehydrogenase, mitochondrial OS=Homo sapiens (Human) OX=9606 GN=ALDH2 PE=1 SV=2;sp|P05091-2|ALDH2-2_HUMAN Isoform of P05091, Isoform 2 of Aldehyde dehydrogenase, mitochondrial OS=Homo sapiens (Human) OX=9606 GN=ALDH2 PE=1 SV=	28008	11327	25721	11034	30271	11020	26450	12445	25312	12280	29507	11095	3	14.7958	13.5514	14.6908	13.4454	14.7932	13.3582	-1.30827	7.16368	5.10458	14.1058	-20.7449	9.10884				keep	2		down	4.1	2	2	4.1	4.1	56.381	0.00024114	2.8141	32131000	2	517	2	2
P29279;P29279-2	P29279;P29279-2	Connective tissue growth factor	CTGF	sp|P29279|CCN2_HUMAN CCN family member 2 OS=Homo sapiens (Human) OX=9606 GN=CCN2 PE=1 SV=2;sp|P29279-2|CCN2-2_HUMAN Isoform of P29279, Isoform 2 of CCN family member 2 OS=Homo sapiens (Human) OX=9606 GN=CCN2 PE=1 SV=2	848520	345050	903910	338890	922450	383540	801350	380100	885420	381620	900710	383050	2	19.7168	18.4803	19.826	18.3862	19.7227	18.4794	-1.30653	7.68613	5.23284	19.1019	-24.4127	10.2989				keep	9		down	30.9	9	9	30.9	30.9	38.091	0	25.534	546200000	12	349	11	11
Q7Z7K6-3;Q7Z7K6;A0A0M3HER2;Q7Z7K6-2	Q7Z7K6-3;Q7Z7K6;A0A0M3HER2;Q7Z7K6-2	Centromere protein V	CENPV	sp|Q7Z7K6-3|CENPV-3_HUMAN Isoform of Q7Z7K6, Isoform 3 of Centromere protein V OS=Homo sapiens (Human) OX=9606 GN=CENPV PE=1 SV=1;sp|Q7Z7K6|CENPV_HUMAN Centromere protein V OS=Homo sapiens (Human) OX=9606 GN=CENPV PE=1 SV=1;tr|A0A0M3HER2|A0A0M3HER2_HUMAN I	949040	389360	961530	363360	975980	400760	896290	427820	943310	408490	953010	400530	4	19.8783	18.6546	19.9151	18.4868	19.8041	18.5427	-1.30447	7.34104	5.15989	19.2136	-21.9214	9.51674				keep	8		down	35.7	8	8	35.7	35.7	29.73	0	19.357	2028300000	8	272	6	6
Q684P5;A0A1B0GV05;Q684P5-3;Q684P5-2	Q684P5;A0A1B0GV05;Q684P5-3;Q684P5-2	Rap1 GTPase-activating protein 2	RAP1GAP2	sp|Q684P5|RPGP2_HUMAN Rap1 GTPase-activating protein 2 OS=Homo sapiens (Human) OX=9606 GN=RAP1GAP2 PE=1 SV=2;tr|A0A1B0GV05|A0A1B0GV05_HUMAN Isoform of Q684P5, Rap-GAP domain-containing protein OS=Homo sapiens (Human) OX=9606 GN=RAP1GAP2 PE=1 SV=1;sp|Q684P5	54950	22637	54785	19987	53689	23751	51897	24848	53763	22549	52477	23639	4	15.7681	14.5503	15.7817	14.3025	15.6199	14.4661	-1.2836	6.46471	4.77728	15.0814	-16.6655	7.45435				keep	2		down	5.1	2	2	5.1	5.1	80.055	0	6.7051	29768000	2	730	2	2
Q15334;A0A087WW77	Q15334;A0A087WW77	Lethal(2) giant larvae protein homolog 1	LLGL1	sp|Q15334|L2GL1_HUMAN Lethal(2) giant larvae protein homolog 1 OS=Homo sapiens (Human) OX=9606 GN=LLGL1 PE=1 SV=3;tr|A0A087WW77|A0A087WW77_HUMAN Isoform of Q15334, LLGL domain-containing protein OS=Homo sapiens (Human) OX=9606 GN=LLGL1 PE=1 SV=1	1290000	503210	1324200	486170	1267700	590390	1218200	557410	1296800	547160	1240500	586020	2	20.3212	19.0247	20.3769	18.9068	20.1814	19.1017	-1.2821	6.67366	4.88941	19.6521	-17.7908	7.95292				keep	19		down	24.9	19	19	24.9	24.9	115.42	0	92.438	1031900000	22	1064	22	22
Q96PM9;Q96PM9-1;F8VQ24;F8VRY0;H0YI55;Q96PM9-2;Q96PM9-3	Q96PM9;Q96PM9-1;F8VQ24;F8VRY0;H0YI55;Q96PM9-2;Q96PM9-3	Zinc finger protein 385A	ZNF385A	sp|Q96PM9|Z385A_HUMAN Zinc finger protein 385A OS=Homo sapiens (Human) OX=9606 GN=ZNF385A PE=1 SV=2;sp|Q96PM9-1|Z385A-1_HUMAN Isoform of Q96PM9, Isoform 1 of Zinc finger protein 385A OS=Homo sapiens (Human) OX=9606 GN=ZNF385A PE=1 SV=2;tr|F8VQ24|F8VQ24_HUM	64392	23000	55967	21668	54323	26221	60797	25742	54936	24206	53219	25980	7	15.9968	14.5732	15.8125	14.419	15.6369	14.6088	-1.28173	5.75945	4.34199	15.1745	-13.3272	5.73059				keep	2		down	8	2	2	8	8	40.453	0	14.993	29699000	2	386	2	2
P35219	P35219	Carbonic anhydrase-related protein	CA8	sp|P35219|CAH8_HUMAN Carbonic anhydrase-related protein OS=Homo sapiens (Human) OX=9606 GN=CA8 PE=1 SV=3	46565	19662	50455	17882	51245	23108	43979	21546	49432	20321	50055	22975	1	15.5292	14.347	15.6629	14.1419	15.5527	14.4265	-1.27647	6.32239	4.67572	14.9434	-15.9336	7.10984				keep	3		down	21.4	3	3	21.4	21.4	32.973	0	16.556	58608000	4	290	4	4
Q2KHM9;F6SFD5;I3L3Y0;Q2KHM9-2	Q2KHM9;F6SFD5;I3L3Y0;Q2KHM9-2	Uncharacterized protein KIAA0753	KIAA0753	sp|Q2KHM9|MOONR_HUMAN Protein moonraker OS=Homo sapiens (Human) OX=9606 GN=KIAA0753 PE=1 SV=3;tr|F6SFD5|F6SFD5_HUMAN Isoform of Q2KHM9, Protein moonraker (Fragment) OS=Homo sapiens (Human) OX=9606 GN=KIAA0753 PE=1 SV=1;tr|I3L3Y0|I3L3Y0_HUMAN Isoform of Q2K	48815	19833	48750	18741	49618	22047	46101	21817	47837	21019	48511	21938	4	15.5973	14.3595	15.6133	14.2096	15.5062	14.3587	-1.263	7.21396	5.11295	14.9408	-21.0713	9.2247				keep	2		down	2.8	2	2	2.8	2.8	109.41	0	7.1902	25808000	3	967	2	2
Q01995;H0YCU9;E9PJ32	Q01995;H0YCU9	Transgelin	TAGLN	sp|Q01995|TAGL_HUMAN Transgelin OS=Homo sapiens (Human) OX=9606 GN=TAGLN PE=1 SV=4;tr|H0YCU9|H0YCU9_HUMAN Isoform of Q01995, Transgelin (Fragment) OS=Homo sapiens (Human) OX=9606 GN=TAGLN PE=1 SV=1	465940	225130	568060	210470	652870	254480	440200	242730	556920	239430	635830	255120	3	18.852	17.8643	19.1558	17.699	19.224	17.8876	-1.2603	5.50307	4.18575	18.4471	-12.2782	5.0955				keep	6		down	33.3	6	6	33.3	33.3	22.611	0	17.504	141690000	8	201	7	7
Q07021;I3L3Q7;I3L3B0	Q07021;I3L3Q7;I3L3B0	Complement component 1 Q subcomponent-binding protein, mitochondrial	C1QBP	sp|Q07021|C1QBP_HUMAN Complement component 1 Q subcomponent-binding protein, mitochondrial OS=Homo sapiens (Human) OX=9606 GN=C1QBP PE=1 SV=1;tr|I3L3Q7|I3L3Q7_HUMAN Isoform of Q07021, Complement component 1 Q subcomponent-binding protein, mitochondrial (Fr	2827200	1081900	2822500	1154900	2935600	1323200	2669700	1200800	2766600	1284500	2872500	1315500	3	21.4532	20.129	21.4687	20.1551	21.3928	20.266	-1.25487	7.53611	5.20551	20.8108	-23.2998	9.96227				keep	9		down	52.1	9	9	52.1	52.1	31.362	0	193.28	24561000000	40	282	39	35
Q0ZGT2-2;Q0ZGT2;E7EUA0;H7BXY5;Q0ZGT2-4;E7ETM8;Q0ZGT2-3	Q0ZGT2-2;Q0ZGT2;E7EUA0;H7BXY5;Q0ZGT2-4;E7ETM8;Q0ZGT2-3	Nexilin	NEXN	sp|Q0ZGT2-2|NEXN-2_HUMAN Isoform of Q0ZGT2, Isoform 2 of Nexilin OS=Homo sapiens (Human) OX=9606 GN=NEXN PE=1 SV=1;sp|Q0ZGT2|NEXN_HUMAN Nexilin OS=Homo sapiens (Human) OX=9606 GN=NEXN PE=1 SV=1;tr|E7EUA0|E7EUA0_HUMAN Isoform of Q0ZGT2, Nexilin (Fragment) O	95225	38323	95613	41076	104560	43418	89929	42223	93856	45500	102200	43366	7	16.5613	15.3098	16.5851	15.3417	16.5816	15.3364	-1.2467	8.32606	5.4389	15.9526	-29.7691	11.6803				keep	4		down	8.2	4	4	8.2	8.2	79.361	0	12.057	32489000	4	662	4	4
Q6PEY1;I3L2J3	Q6PEY1;I3L2J3	Transmembrane protein 88	TMEM88	sp|Q6PEY1|TMM88_HUMAN Transmembrane protein 88 OS=Homo sapiens (Human) OX=9606 GN=TMEM88 PE=1 SV=1;tr|I3L2J3|I3L2J3_HUMAN Isoform of Q6PEY1, Transmembrane protein 88 OS=Homo sapiens (Human) OX=9606 GN=TMEM88 PE=1 SV=1	162500	63648	154270	63258	152720	69045	153450	70327	151500	70135	149560	68640	2	17.3323	16.0417	17.2753	15.9647	17.1281	16.0056	-1.24123	7.02182	5.0804	16.6246	-19.8428	8.77708				keep	2		down	14.5	2	2	14.5	14.5	17.25	0	6.0539	79827000	3	159	3	3
Q9HAC8	Q9HAC8	Ubiquitin domain-containing protein 1	UBTD1	sp|Q9HAC8|UBTD1_HUMAN Ubiquitin domain-containing protein 1 OS=Homo sapiens (Human) OX=9606 GN=UBTD1 PE=1 SV=1	244300	82131	235760	96592	196710	106250	230640	93123	230580	106130	193750	104720	1	17.9205	16.4095	17.8871	16.5753	17.4933	16.6275	-1.22953	4.98297	3.85563	17.1522	-10.3815	3.79942				keep	3		down	18.9	5	3	29.5	18.9	25.938	0	9.7093	168150000	3	227	3	3
Q9BSJ6;I3L419;I3L156;Q9BSJ6-2;I3L2R2;I3L427	Q9BSJ6;I3L419;I3L156;Q9BSJ6-2	Protein FAM64A	FAM64A	sp|Q9BSJ6|PIMRE_HUMAN Protein PIMREG OS=Homo sapiens (Human) OX=9606 GN=PIMREG PE=1 SV=1;tr|I3L419|I3L419_HUMAN Isoform of Q9BSJ6, Protein PIMREG OS=Homo sapiens (Human) OX=9606 GN=PIMREG PE=1 SV=1;tr|I3L156|I3L156_HUMAN Isoform of Q9BSJ6, Protein PIMREG O	500860	187030	519600	199650	462450	240800	472940	208690	508340	222180	454170	237720	6	18.9563	17.5968	19.0272	17.6228	18.7265	17.8078	-1.22753	5.76955	4.34775	18.2896	-13.372	5.75656				keep	4		down	22.2	4	4	22.2	22.2	27.48	0	15.077	216520000	5	248	4	4
Q969Q0;P83881;H0Y5B4;H7BZ11;J3KQN4;H7BY91;H0Y3V9	Q969Q0;P83881;H0Y5B4;H7BZ11;J3KQN4;H7BY91;H0Y3V9	60S ribosomal protein L36a-like;60S ribosomal protein L36a	RPL36AL;RPL36A;RPL36A-HNRNPH2	sp|Q969Q0|RL36L_HUMAN 60S ribosomal protein L36a-like OS=Homo sapiens (Human) OX=9606 GN=RPL36AL PE=1 SV=3;sp|P83881|RL36A_HUMAN 60S ribosomal protein L36a OS=Homo sapiens (Human) OX=9606 GN=RPL36A PE=1 SV=2;tr|H0Y5B4|H0Y5B4_HUMAN Isoform of P83881, 60S ri	385220	280030	491110	143610	527650	187650	364380	288500	486200	169710	512320	189220	7	18.5776	18.1791	18.9459	17.1475	18.9168	17.448	-1.2219	2.9028	2.33464	18.2025	-5.02013	-1.45377				keep	4		down	21.7	4	4	21.7	21.7	12.469	0	7.5069	1318000000	4	106	2	2
Q9ULL1;H0YD71;A0A2R8Y2B1	Q9ULL1	Pleckstrin homology domain-containing family G member 1	PLEKHG1	sp|Q9ULL1|PKHG1_HUMAN Pleckstrin homology domain-containing family G member 1 OS=Homo sapiens (Human) OX=9606 GN=PLEKHG1 PE=1 SV=2	490780	203010	541300	201070	503540	248060	463510	223100	529980	225490	493460	245530	3	18.9269	17.7151	19.0862	17.6331	18.8493	17.8507	-1.22117	6.18243	4.60033	18.3436	-15.2424	6.76853				keep	13		down	12.3	13	13	12.3	12.3	155.44	0	34.054	138130000	13	1385	13	12
Q7Z5J4;A0A1W2PQJ7;Q7Z5J4-2;Q7Z5J4-3;A8MXE8;Q7Z5J4-4;J3QLL5;J3QR08	Q7Z5J4;A0A1W2PQJ7;Q7Z5J4-2;Q7Z5J4-3	Retinoic acid-induced protein 1	RAI1	sp|Q7Z5J4|RAI1_HUMAN Retinoic acid-induced protein 1 OS=Homo sapiens (Human) OX=9606 GN=RAI1 PE=1 SV=2;tr|A0A1W2PQJ7|A0A1W2PQJ7_HUMAN Isoform of Q7Z5J4, PHD-type domain-containing protein OS=Homo sapiens (Human) OX=9606 GN=RAI1 PE=1 SV=1;sp|Q7Z5J4-2|RAI1-2	1511600	610300	1484400	602900	1427700	677460	1427500	671560	1457500	668120	1399600	671770	8	20.5499	19.303	20.5416	19.2173	20.3528	19.3001	-1.20797	6.78252	4.9431	19.8774	-18.4084	8.21187				keep	28		down	22.9	28	28	22.9	22.9	203.35	0	123.44	788190000	32	1906	30	29
Q6RW13;Q6RW13-2	Q6RW13;Q6RW13-2	Type-1 angiotensin II receptor-associated protein	AGTRAP	sp|Q6RW13|ATRAP_HUMAN Type-1 angiotensin II receptor-associated protein OS=Homo sapiens (Human) OX=9606 GN=AGTRAP PE=1 SV=1;sp|Q6RW13-2|ATRAP-2_HUMAN Isoform of Q6RW13, Isoform 2 of Type-1 angiotensin II receptor-associated protein OS=Homo sapiens (Human)	117720	39044	116380	39747	76899	52925	111140	44406	113600	44355	76164	51661	2	16.8672	15.3367	16.8687	15.2943	16.1383	15.622	-1.20707	3.43287	2.72586	16.0212	-6.11883	-0.118264				keep	2		down	24.5	2	2	24.5	24.5	17.419	0	6.5541	65352000	3	159	3	3
Q96JF6	Q96JF6	Zinc finger protein 594	ZNF594	sp|Q96JF6|ZN594_HUMAN Zinc finger protein 594 OS=Homo sapiens (Human) OX=9606 GN=ZNF594 PE=2 SV=3	51117	21665	50587	19847	51045	24457	48279	23678	49714	22180	49982	24241	1	15.6637	14.487	15.6666	14.2923	15.5471	14.5083	-1.1966	6.50724	4.80134	15.0275	-16.8855	7.55466				keep	2		down	2.7	3	2	5	2.7	93.906	0.00012349	3.2391	11044000	2	807	2	2
P0DJD0;P0DJD1;F8VYC4;A0A286YES2;A0A1W2PNU4	P0DJD0;P0DJD1;F8VYC4;A0A286YES2;A0A1W2PNU4	RANBP2-like and GRIP domain-containing protein 1;RANBP2-like and GRIP domain-containing protein 2	RGPD1;RGPD2	sp|P0DJD0|RGPD1_HUMAN RANBP2-like and GRIP domain-containing protein 1 OS=Homo sapiens (Human) OX=9606 GN=RGPD1 PE=2 SV=1;sp|P0DJD1|RGPD2_HUMAN RANBP2-like and GRIP domain-containing protein 2 OS=Homo sapiens (Human) OX=9606 GN=RGPD2 PE=2 SV=1;tr|F8VYC4|F8	544950	217000	544590	234140	566300	266220	514630	239440	534500	258580	554890	264120	5	19.078	17.8112	19.095	17.8527	19.0188	17.9526	-1.19177	7.37263	5.15989	18.4681	-22.1397	9.58954				keep	12		down	10	43	10	31.8	7.6	196.66	0	88.004	404600000	12	1748	11	11
Q9NQZ7	Q9NQZ7	Ectonucleoside triphosphate diphosphohydrolase 7	ENTPD7	sp|Q9NQZ7|ENTP7_HUMAN Ectonucleoside triphosphate diphosphohydrolase 7 OS=Homo sapiens (Human) OX=9606 GN=ENTPD7 PE=2 SV=1	98838	40879	95709	40962	106470	48475	93346	44816	94105	45456	104160	48173	1	16.615	15.403	16.5865	15.3377	16.6077	15.4953	-1.19107	7.41005	5.15989	16.0075	-22.399	9.67489				keep	3		down	8.8	3	3	8.8	8.8	68.959	0	32.595	74633000	4	604	4	4
Q9BT40;Q9BT40-2;C9JZB0;I3L0Y0;K7EPG6;I3L2L1;K7ENF7	Q9BT40;Q9BT40-2;C9JZB0	Inositol polyphosphate 5-phosphatase K	INPP5K	sp|Q9BT40|INP5K_HUMAN Inositol polyphosphate 5-phosphatase K OS=Homo sapiens (Human) OX=9606 GN=INPP5K PE=1 SV=3;sp|Q9BT40-2|INP5K-2_HUMAN Isoform of Q9BT40, Isoform 2 of Inositol polyphosphate 5-phosphatase K OS=Homo sapiens (Human) OX=9606 GN=INPP5K PE=1	482420	185590	483450	225040	512470	236990	455550	205910	474330	246060	502540	235320	7	18.9022	17.5856	18.9232	17.7955	18.8747	17.7848	-1.17807	6.7167	4.90658	18.311	-18.038	8.05776				keep	7		down	17.4	7	7	17.4	17.4	51.09	0	17.904	140340000	9	448	8	8
O75907;A0A0A0MR74	O75907;A0A0A0MR74	Diacylglycerol O-acyltransferase 1	DGAT1	sp|O75907|DGAT1_HUMAN Diacylglycerol O-acyltransferase 1 OS=Homo sapiens (Human) OX=9606 GN=DGAT1 PE=1 SV=2;tr|A0A0A0MR74|A0A0A0MR74_HUMAN Isoform of O75907, Diacylglycerol O-acyltransferase 1 OS=Homo sapiens (Human) OX=9606 GN=DGAT1 PE=1 SV=1	106420	32426	106160	31191	43629	40854	100460	37476	103340	34952	43873	39505	2	16.7216	15.0688	16.736	14.9446	15.3206	15.2486	-1.17207	1.94582	1.60172	15.6734	-3.33514	-3.82823				keep	2		down	6.8	2	2	6.8	6.8	55.278	0	12.691	41502000	2	488	2	2
Q9C026;Q9C026-4;Q9C026-5	Q9C026;Q9C026-4;Q9C026-5	E3 ubiquitin-protein ligase TRIM9	TRIM9	sp|Q9C026|TRIM9_HUMAN E3 ubiquitin-protein ligase TRIM9 OS=Homo sapiens (Human) OX=9606 GN=TRIM9 PE=1 SV=1;sp|Q9C026-4|TRIM9-4_HUMAN Isoform of Q9C026, Isoform 4 of E3 ubiquitin-protein ligase TRIM9 OS=Homo sapiens (Human) OX=9606 GN=TRIM9 PE=1 SV=1;sp|Q9C	30720	12367	33568	14303	37974	18903	29012	13653	32881	15903	37187	18701	3	14.9291	13.6781	15.075	13.8197	15.1203	14.1367	-1.1633	4.89963	3.79535	14.4598	-10.1004	3.58855				keep	2		down	5.9	2	2	5.9	5.9	79.176	0	11.675	14756000	2	710	2	2
Q9GZP9;I3L3R8;I3L4W7;K7EQE8;I3L1W3;I3L1S8;I3L1T3;I3L0R8	Q9GZP9;I3L3R8;I3L4W7;K7EQE8;I3L1W3;I3L1S8;I3L1T3;I3L0R8	Derlin-2	DERL2	sp|Q9GZP9|DERL2_HUMAN Derlin-2 OS=Homo sapiens (Human) OX=9606 GN=DERL2 PE=1 SV=1;tr|I3L3R8|I3L3R8_HUMAN Isoform of Q9GZP9, Derlin-2 OS=Homo sapiens (Human) OX=9606 GN=DERL2 PE=1 SV=1;tr|I3L4W7|I3L4W7_HUMAN Isoform of Q9GZP9, Derlin-2 (Fragment) OS=Homo sa	41144	17368	42899	19815	45606	20261	38859	19015	42144	21691	44689	20161	8	15.3506	14.168	15.4288	14.29	15.3845	14.2368	-1.15637	7.44249	5.15989	14.8098	-22.6254	9.74844				keep	2		down	17.2	2	2	17.2	17.2	27.567	0.00012995	4.2787	77468000	2	239	2	2
O00159-3;O00159;F5H6E2;O00159-2;I3L501;I3L3Y6;I3L3F5	O00159-3;O00159;F5H6E2;O00159-2	Unconventional myosin-Ic	MYO1C	sp|O00159-3|MYO1C-3_HUMAN Isoform of O00159, Isoform 3 of Unconventional myosin-Ic OS=Homo sapiens (Human) OX=9606 GN=MYO1C PE=1 SV=4;sp|O00159|MYO1C_HUMAN Unconventional myosin-Ic OS=Homo sapiens (Human) OX=9606 GN=MYO1C PE=1 SV=4;tr|F5H6E2|F5H6E2_HUMAN I	2176400	950410	2227300	960230	2247700	1035900	2055700	1035000	2190000	1058100	2203000	1028800	7	21.0757	19.9421	21.127	19.8887	21.0076	19.9128	-1.15557	7.55129	5.20761	20.4923	-23.4017	9.99391				keep	25		down	30.4	25	25	30.4	30.4	119.63	0	82.932	1299800000	27	1044	27	27
P18827;E9PHH3;H7C1K4	P18827	Syndecan-1	SDC1	sp|P18827|SDC1_HUMAN Syndecan-1 OS=Homo sapiens (Human) OX=9606 GN=SDC1 PE=1 SV=3	932740	379300	952670	440000	974110	451280	880880	417410	935490	480630	955730	448060	3	19.8533	18.6169	19.9018	18.7629	19.8013	18.714	-1.1542	7.15927	5.10458	19.275	-20.7129	9.09734				keep	7		down	19	7	7	19	19	32.461	0	35.34	573470000	6	310	6	6
Q6DKJ4;Q6DKJ4-3;I3L4V6;A0A0G2JQK5;A0A0C4DGI2;Q6DKJ4-2	Q6DKJ4;Q6DKJ4-3	Nucleoredoxin	NXN	sp|Q6DKJ4|NXN_HUMAN Nucleoredoxin OS=Homo sapiens (Human) OX=9606 GN=NXN PE=1 SV=2;sp|Q6DKJ4-3|NXN-3_HUMAN Isoform of Q6DKJ4, Isoform 3 of Nucleoredoxin OS=Homo sapiens (Human) OX=9606 GN=NXN PE=1 SV=2	1896200	813380	2098100	969760	2533900	1126600	1791000	889690	2058900	1069800	2477800	1121000	6	20.8769	19.7175	21.0408	19.903	21.1805	20.0339	-1.14793	5.25104	4.03527	20.4588	-11.3208	4.46728				keep	15		down	48	15	14	48	45.5	48.392	0	67.81	1481900000	18	435	15	15
Q96RR1;A0A2R8Y4V4;Q96RR1-2;Q96RR1-3;A0A2R8Y746	Q96RR1;A0A2R8Y4V4;Q96RR1-2	Twinkle protein, mitochondrial	PEO1	sp|Q96RR1|PEO1_HUMAN Twinkle protein, mitochondrial OS=Homo sapiens (Human) OX=9606 GN=TWNK PE=1 SV=1;tr|A0A2R8Y4V4|A0A2R8Y4V4_HUMAN Isoform of Q96RR1, SF4 helicase domain-containing protein OS=Homo sapiens (Human) OX=9606 GN=TWNK PE=1 SV=1;sp|Q96RR1-2|PEO	681440	282070	681680	315390	746180	344710	643580	309420	670070	345780	731230	342300	5	19.4005	18.1896	19.4189	18.2825	19.4167	18.3254	-1.1462	7.45346	5.15989	18.8389	-22.7063	9.77448				keep	9		down	19.7	9	9	19.7	19.7	77.153	0	30.898	295220000	12	684	12	12
Q9HCL0;Q9HCL0-2;D6RIG4;B4DLR6;B4DQ29;A0A087WTW3	Q9HCL0;Q9HCL0-2;D6RIG4	Protocadherin-18	PCDH18	sp|Q9HCL0|PCD18_HUMAN Protocadherin-18 OS=Homo sapiens (Human) OX=9606 GN=PCDH18 PE=2 SV=3;sp|Q9HCL0-2|PCD18-2_HUMAN Isoform of Q9HCL0, Isoform 2 of Protocadherin-18 OS=Homo sapiens (Human) OX=9606 GN=PCDH18 PE=2 SV=3;tr|D6RIG4|D6RIG4_HUMAN Isoform of Q9HC	638230	236420	646370	254670	465850	283070	602640	263990	632710	279410	460800	277600	6	19.3059	17.9349	19.3422	17.974	18.7371	18.0412	-1.14503	4.05061	3.18519	18.5559	-7.60201	1.44385				keep	10		down	13	10	10	13	13	126.15	0	28.858	311980000	10	1135	10	10
P51116;I3L1Z2	P51116	Fragile X mental retardation syndrome-related protein 2	FXR2	sp|P51116|FXR2_HUMAN Fragile X mental retardation syndrome-related protein 2 OS=Homo sapiens (Human) OX=9606 GN=FXR2 PE=1 SV=2	1645800	640170	1737600	817350	1849500	903090	1554200	709950	1703300	892730	1815300	894200	2	20.6726	19.372	20.7688	19.6563	20.7263	19.7149	-1.1415	5.60906	4.25806	20.1518	-12.7036	5.35932				keep	19		down	36.6	19	19	36.6	36.6	74.222	0	183.89	1587700000	28	673	26	26
P35580;P35580-2;P35580-5;P35580-3;P35580-4;E7ERA5;P12883;Q9UKX2;P11055;A7E2Y1;A1L2Z2;REV__Q8IYT3;A0A087X0T3	P35580;P35580-2;P35580-5;P35580-3;P35580-4	Myosin-10	MYH10	sp|P35580|MYH10_HUMAN Myosin-10 OS=Homo sapiens (Human) OX=9606 GN=MYH10 PE=1 SV=3;sp|P35580-2|MYH10-2_HUMAN Isoform of P35580, Isoform 2 of Myosin-10 OS=Homo sapiens (Human) OX=9606 GN=MYH10 PE=1 SV=3;sp|P35580-5|MYH10-5_HUMAN Isoform of P35580, Isoform 5	16178000	7134400	16019000	7274000	18184000	8160200	15281000	7752700	15776000	8013000	17797000	8115500	13	23.9698	22.8503	23.9734	22.81	24.0238	22.8905	-1.13873	7.72584	5.23284	23.4196	-24.7138	10.3867				keep	75		down	43.3	84	71	48.4	41.6	229	0	323.31	18542000000	113	1976	107	107
A6ND36;A6ND36-2	A6ND36;A6ND36-2	Protein FAM83G	FAM83G	sp|A6ND36|FA83G_HUMAN Protein FAM83G OS=Homo sapiens (Human) OX=9606 GN=FAM83G PE=1 SV=2;sp|A6ND36-2|FA83G-2_HUMAN Isoform of A6ND36, Isoform 2 of Protein FAM83G OS=Homo sapiens (Human) OX=9606 GN=FAM83G PE=1 SV=2	31214	14435	39418	16059	36794	17629	29487	15672	38594	17763	36096	17473	2	14.9521	13.9012	15.3067	13.9868	15.0748	14.036	-1.13653	5.55752	4.23062	14.5429	-12.4952	5.23123				keep	2		down	3.4	2	2	3.4	3.4	90.834	0.00013031	4.3279	11937000	2	823	2	2
Q9P2F8;Q9P2F8-2	Q9P2F8;Q9P2F8-2	Signal-induced proliferation-associated 1-like protein 2	SIPA1L2	sp|Q9P2F8|SI1L2_HUMAN Signal-induced proliferation-associated 1-like protein 2 OS=Homo sapiens (Human) OX=9606 GN=SIPA1L2 PE=1 SV=2;sp|Q9P2F8-2|SI1L2-2_HUMAN Isoform of Q9P2F8, Isoform 2 of Signal-induced proliferation-associated 1-like protein 2 OS=Homo s	108990	45040	108590	48584	115270	57070	102930	49415	106720	53424	113070	56475	2	16.7561	15.5428	16.7687	15.5839	16.7222	15.7308	-1.12983	6.89279	5.01502	16.1841	-19.0588	8.4742				keep	7		down	4.8	8	7	5.4	4.8	190.44	0	15.999	84194000	7	1722	7	7
Q9H313;A0A0G2JPK6;Q9H313-5;Q9H313-2;Q9H313-3;E7ET67;Q9H313-4	Q9H313;A0A0G2JPK6;Q9H313-5;Q9H313-2;Q9H313-3;E7ET67;Q9H313-4	Protein tweety homolog 1;Protein tweety homolog	TTYH1	sp|Q9H313|TTYH1_HUMAN Protein tweety homolog 1 OS=Homo sapiens (Human) OX=9606 GN=TTYH1 PE=1 SV=1;tr|A0A0G2JPK6|A0A0G2JPK6_HUMAN Isoform of Q9H313, Protein tweety homolog OS=Homo sapiens (Human) OX=9606 GN=TTYH1 PE=1 SV=1;sp|Q9H313-5|TTYH1-5_HUMAN Isoform	47006	20385	43215	19669	46422	21577	44398	22169	42630	21590	45498	21419	7	15.5428	14.3991	15.4394	14.2794	15.4101	14.3276	-1.12873	7.04769	5.0804	14.8997	-20.006	8.83837				keep	2		down	4.9	2	2	4.9	4.9	49.05	0.00012719	3.806	21144000	2	450	2	2
Q9NWW5;A0A1B0GW73;H3BNF1;A0A1B0GTV3;A0A0S2Z5D0;H3BUV4;A0A1B0GUD2;H3BUT1;A0A1B0GTU6;A0A1B0GU90;H3BRN7;H3BTY4;Q9NWW5-2	Q9NWW5;A0A1B0GW73;H3BNF1;A0A1B0GTV3;A0A0S2Z5D0;H3BUV4;A0A1B0GUD2;H3BUT1;A0A1B0GTU6;A0A1B0GU90;H3BRN7;H3BTY4;Q9NWW5-2	Ceroid-lipofuscinosis neuronal protein 6	CLN6	sp|Q9NWW5|CLN6_HUMAN Ceroid-lipofuscinosis neuronal protein 6 OS=Homo sapiens (Human) OX=9606 GN=CLN6 PE=1 SV=1;tr|A0A1B0GW73|A0A1B0GW73_HUMAN ENSG00000260007 readthrough, Uncharacterized protein OS=Homo sapiens (Human) OX=9606 GN=ENSG00000260007 PE=4 SV=1	30807	14962	33114	11164	21707	12203	29106	16074	32562	12473	21414	12006	13	14.9332	13.9529	15.0553	13.4623	14.3134	13.5053	-1.12713	3.11194	2.48994	14.2037	-5.43678	-0.927798				keep	2		down	10.3	2	2	10.3	10.3	35.919	0	14.701	107780000	3	311	2	2
Q96GD4;Q96GD4-2;Q96GD4-5;J3KTD6;Q96GD4-3;Q96GD4-4;J3KRF8;J3QLN8;J3QR41;J3KT86;J3KRJ2;Q9UQB9-2;Q9UQB9-3;Q9UQB9;A0A0A0MSY3;Q5Y191;M0QYK8	Q96GD4;Q96GD4-2;Q96GD4-5;J3KTD6;Q96GD4-3;Q96GD4-4;J3KRF8;J3QLN8	Aurora kinase B	AURKB	sp|Q96GD4|AURKB_HUMAN Aurora kinase B OS=Homo sapiens (Human) OX=9606 GN=AURKB PE=1 SV=3;sp|Q96GD4-2|AURKB-2_HUMAN Isoform of Q96GD4, Isoform 2 of Aurora kinase B OS=Homo sapiens (Human) OX=9606 GN=AURKB PE=1 SV=3;sp|Q96GD4-5|AURKB-5_HUMAN Isoform of Q96GD	679520	255490	640270	240630	405520	268070	641650	284090	627880	264260	402510	262050	17	19.3964	18.0468	19.3285	17.8922	18.537	17.9626	-1.1201	3.08323	2.46825	18.5272	-5.37833	-1.0001				keep	9		down	36.3	9	9	36.3	36.3	39.31	0	38.937	530170000	11	344	11	11
P25445;P25445-6	P25445;P25445-6	Tumor necrosis factor receptor superfamily member 6	FAS	sp|P25445|TNR6_HUMAN Tumor necrosis factor receptor superfamily member 6 OS=Homo sapiens (Human) OX=9606 GN=FAS PE=1 SV=1;sp|P25445-6|TNR6-6_HUMAN Isoform of P25445, Isoform 6 of Tumor necrosis factor receptor superfamily member 6 OS=Homo sapiens (Human) O	12532	4468.4	14463	6923.5	12778	7036.7	11832	5039.8	14125	7473.8	12615	6929.3	2	13.6356	12.2094	13.8602	12.773	13.549	12.7111	-1.1171	3.942	3.10405	13.123	-7.32317	1.16906				keep	2		down	6.9	2	2	6.9	6.9	37.732	0	27.453	2356600	2	335	2	2
Q9P0M6;Q5SQT3	Q9P0M6;Q5SQT3	Core histone macro-H2A.2;Histone H2A	H2AFY2	sp|Q9P0M6|H2AW_HUMAN Core histone macro-H2A.2 OS=Homo sapiens (Human) OX=9606 GN=H2AFY2 PE=1 SV=3;tr|Q5SQT3|Q5SQT3_HUMAN Isoform of Q9P0M6, Histone H2A (Fragment) OS=Homo sapiens (Human) OX=9606 GN=MACROH2A2 PE=1 SV=8	1293700	551660	1183800	528630	1153500	569460	1221900	601360	1167200	578620	1133100	563600	2	20.3253	19.1573	20.2152	19.0276	20.0452	19.0496	-1.11707	5.98716	4.49894	19.6367	-14.3325	6.29335				keep	10		down	34.1	12	10	41.1	34.1	40.058	0	35.301	1499000000	12	372	11	11
Q8N428;Q8N428-2	Q8N428;Q8N428-2	Polypeptide N-acetylgalactosaminyltransferase 16	GALNT16	sp|Q8N428|GLT16_HUMAN Polypeptide N-acetylgalactosaminyltransferase 16 OS=Homo sapiens (Human) OX=9606 GN=GALNT16 PE=1 SV=2;sp|Q8N428-2|GLT16-2_HUMAN Isoform of Q8N428, Isoform 2 of Polypeptide N-acetylgalactosaminyltransferase 16 OS=Homo sapiens (Human) O	156510	65620	170940	72381	150060	80637	147820	71997	167600	79373	147740	79492	2	17.2781	16.0857	17.4233	16.159	17.1028	16.2295	-1.11	5.70553	4.31876	16.7131	-13.1021	5.59862				keep	2		down	4.7	2	2	4.7	4.7	63.073	0.00024018	2.7457	65527000	2	558	2	2
Q13268;C9JZP6;Q13268-2;H0YJP4;H0YJG9	Q13268;C9JZP6;Q13268-2;H0YJP4;H0YJG9	Dehydrogenase/reductase SDR family member 2, mitochondrial	DHRS2	sp|Q13268|DHRS2_HUMAN Dehydrogenase/reductase SDR family member 2, mitochondrial OS=Homo sapiens (Human) OX=9606 GN=DHRS2 PE=1 SV=4;tr|C9JZP6|C9JZP6_HUMAN Isoform of Q13268, Dehydrogenase/reductase SDR family member 2, mitochondrial (Fragment) OS=Homo sapi	818080	331410	810360	368480	774180	402090	772590	364650	796210	401940	761610	396990	5	19.6641	18.4221	19.6684	18.5069	19.4699	18.5475	-1.10863	6.37366	4.70997	19.0465	-16.189	7.232				keep	8		down	50.4	8	8	50.4	50.4	29.926	0	35.682	669420000	10	280	9	9
P24588	P24588	A-kinase anchor protein 5	AKAP5	sp|P24588|AKAP5_HUMAN A-kinase anchor protein 5 OS=Homo sapiens (Human) OX=9606 GN=AKAP5 PE=1 SV=3	72157	29822	71387	33939	76953	37865	68147	32714	70203	37044	75536	37482	1	16.1611	14.948	16.1635	15.0664	16.1393	15.1389	-1.10353	6.88941	5.01502	15.6029	-19.046	8.46914				keep	3		down	7.3	3	3	7.3	7.3	47.088	0	6.9968	36470000	3	427	3	3
Q8N5M1;C9J2Q2;K7ELC1	Q8N5M1;C9J2Q2	ATP synthase mitochondrial F1 complex assembly factor 2	ATPAF2	sp|Q8N5M1|ATPF2_HUMAN ATP synthase mitochondrial F1 complex assembly factor 2 OS=Homo sapiens (Human) OX=9606 GN=ATPAF2 PE=1 SV=1;tr|C9J2Q2|C9J2Q2_HUMAN Isoform of Q8N5M1, ATP synthase mitochondrial F1 complex assembly factor 2 (Fragment) OS=Homo sapiens (	102360	44529	103000	51312	105550	47420	96680	48499	101420	55503	103660	47063	3	16.6655	15.5263	16.6924	15.6627	16.5951	15.4636	-1.10013	6.61439	4.84771	16.1009	-17.4681	7.81359				keep	5		down	23.5	5	5	23.5	23.5	32.772	0	14.301	60387000	4	289	4	4
P61769;H0YLF3;F5H6I0	P61769;H0YLF3;F5H6I0	Beta-2-microglobulin;Beta-2-microglobulin form pI 5.3	B2M	sp|P61769|B2MG_HUMAN Beta-2-microglobulin OS=Homo sapiens (Human) OX=9606 GN=B2M PE=1 SV=1;tr|H0YLF3|H0YLF3_HUMAN Isoform of P61769, Beta-2-microglobulin (Fragment) OS=Homo sapiens (Human) OX=9606 GN=B2M PE=1 SV=1;tr|F5H6I0|F5H6I0_HUMAN Isoform of P61769,	994450	289260	909000	240940	258290	326240	938620	336500	885200	271470	264460	313330	3	19.9458	18.2259	19.8341	17.894	17.8862	18.2459	-1.1001	1.22064	1.01609	18.672	-2.21168	-5.55142				keep	2			16.8	2	2	16.8	16.8	13.714	0.00024158	2.8429	467730000	2	119	2	2
Q8N8J7	Q8N8J7	Uncharacterized protein C4orf32	C4orf32	sp|Q8N8J7|F241A_HUMAN Uncharacterized protein FAM241A OS=Homo sapiens (Human) OX=9606 GN=FAM241A PE=2 SV=2	146900	51684	131160	57342	94649	60837	138700	58028	128710	62061	93941	59532	1	17.1867	15.7413	17.0411	15.823	16.4379	15.823	-1.0928	3.51217	2.78338	16.3422	-6.29603	0.0820782				keep	2		down	25	2	2	25	25	14.652	0	4.7398	65284000	2	132	2	2
Q6IAN0;A0A0C4DGQ8;J3QKT1	Q6IAN0;A0A0C4DGQ8	Dehydrogenase/reductase SDR family member 7B	DHRS7B	sp|Q6IAN0|DRS7B_HUMAN Dehydrogenase/reductase SDR family member 7B OS=Homo sapiens (Human) OX=9606 GN=DHRS7B PE=1 SV=2;tr|A0A0C4DGQ8|A0A0C4DGQ8_HUMAN Isoform of Q6IAN0, Dehydrogenase/reductase SDR family member 7B OS=Homo sapiens (Human) OX=9606 GN=DHRS7B	112620	56079	115310	52404	125730	55316	106410	59992	113850	57578	123100	55071	3	16.8033	15.8591	16.8553	15.6931	16.8475	15.6858	-1.08937	6.77211	4.9393	16.2907	-18.3547	8.18977				keep	3		down	10.8	3	3	10.8	10.8	35.119	0	4.6168	49442000	3	325	3	3
P02649;E9PEV4;E7ERP7;H0Y7L5	P02649;E9PEV4;E7ERP7;H0Y7L5	Apolipoprotein E	APOE	sp|P02649|APOE_HUMAN Apolipoprotein E OS=Homo sapiens (Human) OX=9606 GN=APOE PE=1 SV=1;tr|E9PEV4|E9PEV4_HUMAN Isoform of P02649, Apolipoprotein E (Fragment) OS=Homo sapiens (Human) OX=9606 GN=APOE PE=1 SV=1;tr|E7ERP7|E7ERP7_HUMAN Isoform of P02649, Apolip	241000	104340	238170	117450	252210	118330	227630	113680	234590	127440	247630	117410	4	17.9009	16.7548	17.9018	16.8574	17.8518	16.7828	-1.0865	7.43297	5.15989	17.3416	-22.563	9.72823				keep	4		down	13.6	6	4	20.2	13.6	36.154	0	9.6466	170480000	4	317	4	4
P43155;P43155-3;P43155-2;B7ZBP5;A6PVN3;H0Y4Z7	P43155;P43155-3;P43155-2	Carnitine O-acetyltransferase	CRAT	sp|P43155|CACP_HUMAN Carnitine O-acetyltransferase OS=Homo sapiens (Human) OX=9606 GN=CRAT PE=1 SV=5;sp|P43155-3|CACP-3_HUMAN Isoform of P43155, Isoform 3 of Carnitine O-acetyltransferase OS=Homo sapiens (Human) OX=9606 GN=CRAT PE=1 SV=5;sp|P43155-2|CACP-2	398240	162090	387710	161910	322630	190730	376100	178150	380930	177440	318410	187260	6	18.6255	17.3903	18.6048	17.3206	18.2071	17.4715	-1.085	4.76955	3.70678	17.9366	-9.6712	3.25594				keep	7		down	13.3	7	7	13.3	13.3	70.857	0	17.206	146480000	9	626	8	8
Q99969;C9J8S2	Q99969;C9J8S2	Retinoic acid receptor responder protein 2	RARRES2	sp|Q99969|RARR2_HUMAN Retinoic acid receptor responder protein 2 OS=Homo sapiens (Human) OX=9606 GN=RARRES2 PE=1 SV=1;tr|C9J8S2|C9J8S2_HUMAN Isoform of Q99969, Retinoic acid receptor responder protein 2 (Fragment) OS=Homo sapiens (Human) OX=9606 GN=RARRES2	69019	30898	70418	33375	74194	35136	65195	33526	69341	36393	72812	34846	2	16.0969	14.9991	16.1438	15.0422	16.0866	15.031	-1.085	7.72584	5.23284	15.5666	-24.717	10.3876				keep	3		down	31.3	3	3	31.3	31.3	18.617	0	5.6595	173570000	3	163	2	2
Q9HC36;I3L443;I3L0T6	Q9HC36	rRNA methyltransferase 3, mitochondrial	RNMTL1	sp|Q9HC36|MRM3_HUMAN rRNA methyltransferase 3, mitochondrial OS=Homo sapiens (Human) OX=9606 GN=MRM3 PE=1 SV=2	935640	423130	924960	432690	973820	476110	883820	458170	911800	472650	955920	471440	3	19.8578	18.7746	19.8592	18.7387	19.8009	18.7913	-1.0711	7.62709	5.23284	19.3038	-23.9626	10.1651				keep	11		down	33.8	11	11	33.8	33.8	47.019	0	20.331	1061800000	12	420	11	11
Q69YZ2	Q69YZ2	Transmembrane protein 200B	TMEM200B	sp|Q69YZ2|T200B_HUMAN Transmembrane protein 200B OS=Homo sapiens (Human) OX=9606 GN=TMEM200B PE=2 SV=1	104510	41699	102920	53841	119250	59421	98695	45886	101210	58277	117120	58706	1	16.6955	15.4316	16.6913	15.7321	16.7712	15.7891	-1.0684	5.30539	4.06298	16.1851	-11.5212	4.60299				keep	3		down	14.7	3	3	14.7	14.7	32.749	0	6.609	38264000	4	307	3	2
Q03135;C9JKI3;E9PCT5;Q03135-2;P56539	Q03135;C9JKI3;E9PCT5;Q03135-2;P56539	Caveolin-1;Caveolin;Caveolin-3	CAV1;CAV3	sp|Q03135|CAV1_HUMAN Caveolin-1 OS=Homo sapiens (Human) OX=9606 GN=CAV1 PE=1 SV=4;tr|C9JKI3|C9JKI3_HUMAN Isoform of Q03135, Caveolin (Fragment) OS=Homo sapiens (Human) OX=9606 GN=CAV1 PE=1 SV=1;tr|E9PCT5|E9PCT5_HUMAN Isoform of Q03135, Caveolin OS=Homo sap	509180	225760	488490	233650	553160	272630	480960	244970	481770	255550	542590	269850	5	18.98	17.8683	18.9381	17.8497	18.9849	17.9869	-1.06603	7.08355	5.08302	18.4346	-20.2322	8.92239				keep	2		down	17.4	2	2	17.4	17.4	20.471	0	6.0966	145560000	2	178	2	2
P17026	P17026	Zinc finger protein 22	ZNF22	sp|P17026|ZNF22_HUMAN Zinc finger protein 22 OS=Homo sapiens (Human) OX=9606 GN=ZNF22 PE=1 SV=3	253830	88796	244420	81528	106340	97120	239650	99979	238980	89818	107080	93975	1	17.9757	16.5221	17.9392	16.3307	16.6059	16.4978	-1.05673	1.83429	1.51556	16.9786	-3.15688	-4.09936				keep	3		down	15.2	3	3	15.2	15.2	25.915	0	9.9011	183060000	3	224	3	3
P19022;P19022-2;C9J8J8;P55283;A0A0G2JRA4;A0A087WX99;P55283-2	P19022;P19022-2	Cadherin-2	CDH2	sp|P19022|CADH2_HUMAN Cadherin-2 OS=Homo sapiens (Human) OX=9606 GN=CDH2 PE=1 SV=4;sp|P19022-2|CADH2-2_HUMAN Isoform of P19022, Isoform 2 of Cadherin-2 OS=Homo sapiens (Human) OX=9606 GN=CDH2 PE=1 SV=4	1064100	482030	1059900	491860	1062500	546520	1005200	521910	1044600	536450	1044600	539840	7	20.0434	18.9627	20.0557	18.9236	19.9266	18.9903	-1.0497	7.03433	5.0804	19.4837	-19.9228	8.8072				keep	20		down	34	20	20	34	34	99.808	0	87.616	2388500000	19	906	17	17
P50440-2;P50440;P50440-3;H0YKW9;H0YMX4;H0YN43;H0YLC6	P50440-2;P50440;P50440-3	Glycine amidinotransferase, mitochondrial	GATM	sp|P50440-2|GATM-2_HUMAN Isoform of P50440, Isoform 2 of Glycine amidinotransferase, mitochondrial OS=Homo sapiens (Human) OX=9606 GN=GATM PE=1 SV=1;sp|P50440|GATM_HUMAN Glycine amidinotransferase, mitochondrial OS=Homo sapiens (Human) OX=9606 GN=GATM PE=1	437420	198790	434260	202370	449820	230470	413190	215130	428080	220990	441970	227690	7	18.7609	17.6848	18.7684	17.6424	18.6866	17.7446	-1.04803	7.19314	5.11295	18.2146	-20.9368	9.17722				keep	9		down	31.2	9	9	31.2	31.2	44.883	0	47.803	467610000	9	391	8	8
Q7KZN9;Q7KZN9-2;A0A3B3IRX1	Q7KZN9;Q7KZN9-2	Cytochrome c oxidase assembly protein COX15 homolog	COX15	sp|Q7KZN9|COX15_HUMAN Cytochrome c oxidase assembly protein COX15 homolog OS=Homo sapiens (Human) OX=9606 GN=COX15 PE=1 SV=1;sp|Q7KZN9-2|COX15-2_HUMAN Isoform of Q7KZN9, Isoform 2 of Cytochrome c oxidase assembly protein COX15 homolog OS=Homo sapiens (Huma	678110	252990	637520	344160	668970	361500	640310	281640	626780	369190	659530	356280	3	19.3934	18.0326	19.3223	18.4084	19.2592	18.394	-1.04663	4.92812	3.81555	18.8016	-10.192	3.65783				keep	6		down	21.2	6	6	21.2	21.2	46.03	0	26.488	653530000	13	410	13	13
P61457	P61457	Pterin-4-alpha-carbinolamine dehydratase	PCBD1	sp|P61457|PHS_HUMAN Pterin-4-alpha-carbinolamine dehydratase OS=Homo sapiens (Human) OX=9606 GN=PCBD1 PE=1 SV=2	547840	204530	605090	390720	753390	341590	517290	228610	593700	414110	740910	339530	1	19.0856	17.7258	19.247	18.5915	19.4306	18.3123	-1.04453	2.95051	2.37096	18.7321	-5.11338	-1.33391				keep	2		down	23.1	2	2	23.1	23.1	11.999	0	5.6157	620320000	4	104	4	4
Q15276;Q15276-2;K7ENJ9;A0A087WZZ3;I3L456	Q15276;Q15276-2	Rab GTPase-binding effector protein 1	RABEP1	sp|Q15276|RABE1_HUMAN Rab GTPase-binding effector protein 1 OS=Homo sapiens (Human) OX=9606 GN=RABEP1 PE=1 SV=2;sp|Q15276-2|RABE1-2_HUMAN Isoform of Q15276, Isoform 2 of Rab GTPase-binding effector protein 1 OS=Homo sapiens (Human) OX=9606 GN=RABEP1 PE=1 S	893940	452220	990200	444650	1111000	534830	844650	483580	975770	490320	1088400	529980	5	19.792	18.8706	19.9575	18.778	19.991	18.9591	-1.04427	6.0348	4.52433	19.3914	-14.5473	6.40836				keep	20		down	27.1	20	20	27.1	27.1	99.289	0	42.775	502670000	21	862	18	18
P52943;H0YFA4;P52943-2;H0YHD8	P52943;H0YFA4;P52943-2	Cysteine-rich protein 2	CRIP2	sp|P52943|CRIP2_HUMAN Cysteine-rich protein 2 OS=Homo sapiens (Human) OX=9606 GN=CRIP2 PE=1 SV=1;tr|H0YFA4|H0YFA4_HUMAN Isoform of P52943, LIM zinc-binding domain-containing protein (Fragment) OS=Homo sapiens (Human) OX=9606 GN=CRIP2 PE=1 SV=1;sp|P52943-2|	246880	117520	263160	129360	323150	152420	233240	126570	259330	141640	316490	151190	4	17.9357	16.9264	18.0457	16.9967	18.2094	17.1481	-1.03987	5.46852	4.16368	17.5437	-12.1427	5.00957				keep	6		down	41.8	6	6	41.8	41.8	22.492	0	23.762	598750000	8	208	2	2
Q8TF44	Q8TF44	C2 calcium-dependent domain-containing protein 4C	C2CD4C	sp|Q8TF44|C2C4C_HUMAN C2 calcium-dependent domain-containing protein 4C OS=Homo sapiens (Human) OX=9606 GN=C2CD4C PE=1 SV=2	57380	30383	70804	32650	73989	33607	54223	32381	69664	35672	72543	33401	1	15.8305	14.9749	16.1517	15.0105	16.0826	14.9668	-1.03753	5.56703	4.23508	15.5028	-12.5299	5.25271				keep	4		down	17.1	4	4	17.1	17.1	44.576	0	33.667	77866000	4	421	3	3
O00462;A0A2R8YEC9;A0A2R8Y524;E9PFW2;A0A2R8YCE9;A0A2R8Y4U7;A0A2R8YE79;A0A2R8Y7N1;A0A2R8Y7A7;A0A2R8Y211;A0A2R8Y7A0	O00462;A0A2R8YEC9;A0A2R8Y524;E9PFW2;A0A2R8YCE9;A0A2R8Y4U7;A0A2R8YE79;A0A2R8Y7N1	Beta-mannosidase	MANBA	sp|O00462|MANBA_HUMAN Beta-mannosidase OS=Homo sapiens (Human) OX=9606 GN=MANBA PE=1 SV=3;tr|A0A2R8YEC9|A0A2R8YEC9_HUMAN Isoform of O00462, Beta-mannosidase OS=Homo sapiens (Human) OX=9606 GN=MANBA PE=1 SV=1;tr|A0A2R8Y524|A0A2R8Y524_HUMAN Isoform of O00462	388820	177300	376650	180430	399100	202750	367290	191680	371670	196550	392110	200390	11	18.591	17.5197	18.563	17.4768	18.514	17.5597	-1.03727	7.33348	5.15989	18.0374	-21.8734	9.50061				keep	11		down	16.5	11	11	16.5	16.5	100.89	0	39.491	165270000	11	879	10	10
O14939;O14939-4;I3L1F3;O14939-3;I3L222;I3L381;I3L3I7	O14939;O14939-4	Phospholipase D2	PLD2	sp|O14939|PLD2_HUMAN Phospholipase D2 OS=Homo sapiens (Human) OX=9606 GN=PLD2 PE=1 SV=2;sp|O14939-4|PLD2-4_HUMAN Isoform of O14939, Isoform PLD2B of Phospholipase D2 OS=Homo sapiens (Human) OX=9606 GN=PLD2 PE=1 SV=2	159420	80371	152970	80154	191670	80767	150630	85737	151580	87110	187560	80603	7	17.3047	16.3783	17.2631	16.3062	17.4558	16.2318	-1.03577	6.23807	4.62525	16.8233	-15.513	6.90407				keep	6		down	9.9	6	6	9.9	9.9	105.99	0	14.86	91912000	6	933	5	5
Q16527;F8VW96;F8VQR7	Q16527;F8VW96;F8VQR7	Cysteine and glycine-rich protein 2	CSRP2	sp|Q16527|CSRP2_HUMAN Cysteine and glycine-rich protein 2 OS=Homo sapiens (Human) OX=9606 GN=CSRP2 PE=1 SV=3;tr|F8VW96|F8VW96_HUMAN Isoform of Q16527, Cysteine and glycine-rich protein 2 OS=Homo sapiens (Human) OX=9606 GN=CSRP2 PE=1 SV=1;tr|F8VQR7|F8VQR7_H	603460	289950	619820	296990	666650	322510	570110	311640	611520	323770	654330	319510	3	19.2251	18.2293	19.2817	18.1958	19.2541	18.2293	-1.0355	7.61439	5.23284	18.7359	-23.8717	10.1377				keep	6		down	41.5	6	6	41.5	41.5	20.954	0	31.971	1761300000	12	193	11	11
Q6P1Q0;F8VP71;F8VVQ3;F8VZA2;Q6P1Q0-4;Q6P1Q0-2;Q6P1Q0-7;H0YIV5;H0YHF4;F8VR33;F8VS60;F8W1Z2;Q6P1Q0-5	Q6P1Q0;F8VP71;F8VVQ3;F8VZA2;Q6P1Q0-4;Q6P1Q0-2;Q6P1Q0-7;H0YIV5	LETM1 domain-containing protein 1	LETMD1	sp|Q6P1Q0|LTMD1_HUMAN LETM1 domain-containing protein 1 OS=Homo sapiens (Human) OX=9606 GN=LETMD1 PE=1 SV=1;tr|F8VP71|F8VP71_HUMAN Isoform of Q6P1Q0, Letm1 RBD domain-containing protein OS=Homo sapiens (Human) OX=9606 GN=LETMD1 PE=1 SV=1;tr|F8VVQ3|F8VVQ3_H	189340	89627	192310	93848	195970	95980	178870	96502	189740	101770	192640	95030	13	17.5529	16.5355	17.5932	16.5338	17.4879	16.4808	-1.02797	7.23657	5.11295	17.0307	-21.2184	9.27622				keep	4		down	13.3	4	4	13.3	13.3	41.79	0	8.5611	115530000	4	360	4	4
Q2T9J0;Q2T9J0-2	Q2T9J0;Q2T9J0-2	Peroxisomal leader peptide-processing protease;Peroxisomal leader peptide-processing protease, 15 kDa form;Peroxisomal leader peptide-processing protease, 45 kDa form	TYSND1	sp|Q2T9J0|TYSD1_HUMAN Peroxisomal leader peptide-processing protease OS=Homo sapiens (Human) OX=9606 GN=TYSND1 PE=1 SV=3;sp|Q2T9J0-2|TYSD1-2_HUMAN Isoform of Q2T9J0, Isoform 2 of Peroxisomal leader peptide-processing protease OS=Homo sapiens (Human) OX=960	179410	93701	179490	80920	201120	97491	169530	99597	177610	89175	197070	96574	2	17.4751	16.5997	17.4937	16.3199	17.5253	16.5033	-1.02373	5.90309	4.42829	16.9862	-13.9529	6.08576				keep	9		down	25.1	9	9	25.1	25.1	59.308	0	60.658	131860000	10	566	9	9
Q9BQG0;Q9BQG0-2;I3L1L3;I3L2H8;I3L311	Q9BQG0;Q9BQG0-2;I3L1L3	Myb-binding protein 1A	MYBBP1A	sp|Q9BQG0|MBB1A_HUMAN Myb-binding protein 1A OS=Homo sapiens (Human) OX=9606 GN=MYBBP1A PE=1 SV=2;sp|Q9BQG0-2|MBB1A-2_HUMAN Isoform of Q9BQG0, Isoform 2 of Myb-binding protein 1A OS=Homo sapiens (Human) OX=9606 GN=MYBBP1A PE=1 SV=2;tr|I3L1L3|I3L1L3_HUMAN I	11533000	5533800	11407000	5506100	11349000	5634000	10896000	5944400	11267000	5971500	11161000	5574500	5	23.4815	22.4837	23.4836	22.4083	23.3436	22.3561	-1.0202	6.55129	4.82974	22.9261	-17.1208	7.66044				keep	54		down	45	54	54	45	45	148.85	0	298.21	12370000000	88	1328	82	82
P04637;P04637-4;A0A0U1RQC9;A0A087WZU8;J3KP33;P04637-3;P04637-2;P04637-7;P04637-5;P04637-6;A0A087X1Q1;E7EQX7;P04637-9;P04637-8;E7ESS1;E7EMR6;A0A087WXZ1;A0A087WT22;E9PFT5;S4R334;E9PCY9	P04637;P04637-4;A0A0U1RQC9;A0A087WZU8;J3KP33;P04637-3;P04637-2;P04637-7;P04637-5;P04637-6;A0A087X1Q1;E7EQX7	Cellular tumor antigen p53	TP53	sp|P04637|P53_HUMAN Cellular tumor antigen p53 OS=Homo sapiens (Human) OX=9606 GN=TP53 PE=1 SV=4;sp|P04637-4|P53-4_HUMAN Isoform of P04637, Isoform 4 of Cellular tumor antigen p53 OS=Homo sapiens (Human) OX=9606 GN=TP53 PE=1 SV=4;tr|A0A0U1RQC9|A0A0U1RQC9_H	1124600	532920	1190400	550380	1102600	584840	1062400	574210	1172600	598110	1086100	576880	21	20.1232	19.1074	20.2232	19.0858	19.9801	19.088	-1.0151	6.21112	4.61618	19.6013	-15.382	6.83877				keep	9		down	33.8	9	8	33.8	27.7	43.653	0	23.499	610430000	8	393	8	8
O14495;A0A286YF41;A0A286YEZ7;A0A286YES4	O14495;A0A286YF41;A0A286YEZ7;A0A286YES4	Lipid phosphate phosphohydrolase 3	PPAP2B	sp|O14495|PLPP3_HUMAN Phospholipid phosphatase 3 OS=Homo sapiens (Human) OX=9606 GN=PLPP3 PE=1 SV=1;tr|A0A286YF41|A0A286YF41_HUMAN ENSG00000284686 readthrough, Uncharacterized protein (Fragment) OS=Homo sapiens (Human) OX=9606 GN=ENSG00000284686 PE=4 SV=1;	24555	11156	25129	12953	29229	14547	23195	12081	24770	14049	28698	14392	4	14.606	13.5294	14.6572	13.6767	14.7427	13.7588	-1.01367	6.01189	4.51004	14.1618	-14.4421	6.35228				keep	2		down	6.8	2	2	6.8	6.8	35.116	0.00012528	3.5265	24456000	2	311	2	2
Q9C0C2;Q9C0C2-2;A0A2R8Y5C4;E9PKK0;E9PKE7	Q9C0C2;Q9C0C2-2	182 kDa tankyrase-1-binding protein	TNKS1BP1	sp|Q9C0C2|TB182_HUMAN 182 kDa tankyrase-1-binding protein OS=Homo sapiens (Human) OX=9606 GN=TNKS1BP1 PE=1 SV=4;sp|Q9C0C2-2|TB182-2_HUMAN Isoform of Q9C0C2, Isoform 2 of 182 kDa tankyrase-1-binding protein OS=Homo sapiens (Human) OX=9606 GN=TNKS1BP1 PE=1 S	3541100	1715500	3764300	1806300	4233900	2131200	3345500	1842700	3711100	1973900	4155000	2107300	5	21.778	20.7941	21.8841	20.8003	21.9211	20.9536	-1.01173	6.29328	4.65365	21.3552	-15.7859	7.03828				keep	53		down	43.1	53	53	43.1	43.1	181.79	0	302.9	3125400000	60	1729	57	56
P12532;P12532-2;F8WCN3;C9JSQ1;C9J995;C9J8F6;P17540;C9JJX8;C9JT96;C9J6W7	P12532;P12532-2;F8WCN3;C9JSQ1	Creatine kinase U-type, mitochondrial	CKMT1A;CKMT1B	sp|P12532|KCRU_HUMAN Creatine kinase U-type, mitochondrial OS=Homo sapiens (Human) OX=9606 GN=CKMT1B PE=1 SV=1;sp|P12532-2|KCRU-2_HUMAN Isoform of P12532, Isoform 2 of Creatine kinase U-type, mitochondrial OS=Homo sapiens (Human) OX=9606 GN=CKMT1A PE=1 SV=	806550	365500	790200	400000	824150	420970	761880	395580	779700	432300	810850	415960	10	19.6436	18.5634	19.632	18.6254	19.5601	18.6137	-1.01107	7.2652	5.11295	19.1064	-21.4114	9.3432				keep	13		down	42.7	13	13	42.7	42.7	47.036	0	109.47	1331700000	21	417	16	16
Q86UN3;G3V1D7;Q86UN3-2	Q86UN3;G3V1D7;Q86UN3-2	Reticulon-4 receptor-like 2	RTN4RL2	sp|Q86UN3|R4RL2_HUMAN Reticulon-4 receptor-like 2 OS=Homo sapiens (Human) OX=9606 GN=RTN4RL2 PE=1 SV=1;tr|G3V1D7|G3V1D7_HUMAN Isoform of Q86UN3, Reticulon 4 receptor-like 2, isoform CRA_a OS=Homo sapiens (Human) OX=9606 GN=RTN4RL2 PE=1 SV=1;sp|Q86UN3-2|R4R	148720	73332	146000	72972	158730	75530	140510	78482	144410	79158	155840	74889	3	17.2045	16.246	17.1958	16.1708	17.1838	16.1351	-1.01073	7.24109	5.11295	16.6893	-21.2509	9.28757				keep	5		down	14.3	5	5	14.3	14.3	46.105	0	13.862	149050000	5	420	5	5
Q9Y666;A0A0G2JNW7;A0A0U1RR18;A0A0G2JQE3;H0YB78;Q9Y666-2	Q9Y666;A0A0G2JNW7;A0A0U1RR18	Solute carrier family 12 member 7	SLC12A7	sp|Q9Y666|S12A7_HUMAN Solute carrier family 12 member 7 OS=Homo sapiens (Human) OX=9606 GN=SLC12A7 PE=1 SV=3;tr|A0A0G2JNW7|A0A0G2JNW7_HUMAN Isoform of Q9Y666, Solute carrier family 12 member 7 OS=Homo sapiens (Human) OX=9606 GN=SLC12A7 PE=1 SV=1;tr|A0A0U1R	47892	22034	41473	19438	38467	20991	45241	23740	41075	21089	37916	20679	6	15.5697	14.5113	15.38	14.2623	15.1389	14.2879	-1.00903	4.46471	3.48234	14.8584	-8.74614	2.4916				keep	5		down	6.7	5	5	6.7	6.7	119.1	0	32.192	52329000	5	1083	5	5
P51648;A0A5F9ZHI5;P51648-2;J3QRD1;A0A5F9ZHN9;A0A5F9ZI12;A0A5F9ZGX4;A0A5K1VW72;A0A5F9ZHZ9;I3L1M4;J3QS00;I3L0X1;J3KTG1;A0A5F9ZHP6;J3QKK9;K7EN73;E9PJV0;I3L3I9;C9JMC5;A0A0D9SGC3;I3L2W1;A8MYB8;P43353-2;C9JKT2;E9PNN6;P48448;P43353;P30838	P51648;A0A5F9ZHI5;P51648-2;J3QRD1;A0A5F9ZHN9;A0A5F9ZI12;A0A5F9ZGX4;A0A5K1VW72;A0A5F9ZHZ9;I3L1M4	Fatty aldehyde dehydrogenase	ALDH3A2	sp|P51648|AL3A2_HUMAN Aldehyde dehydrogenase family 3 member A2 OS=Homo sapiens (Human) OX=9606 GN=ALDH3A2 PE=1 SV=1;tr|A0A5F9ZHI5|A0A5F9ZHI5_HUMAN Isoform of P51648, Aldehyde dehydrogenase OS=Homo sapiens (Human) OX=9606 GN=ALDH3A2 PE=1 SV=1;sp|P51648-2|A	1710200	804610	1709500	847630	1771900	894810	1615600	866750	1687300	918140	1742500	884640	28	20.728	19.7018	20.7453	19.7088	20.6644	19.7016	-1.0085	7.43297	5.15989	20.2083	-22.5593	9.72705				keep	13		down	27.2	13	13	27.2	27.2	54.847	0	45.83	2020800000	21	485	17	17
O95208;O95208-2;F6PQP6;E9PBC1;I3L2B2;O95208-3;J3KSC7;J3QLN2;J3KSF8;J3KTF6;J3KSA6;I3L356;I3L2H1;O95208-5	O95208;O95208-2;F6PQP6;E9PBC1;I3L2B2;O95208-3;J3KSC7;J3QLN2	Epsin-2	EPN2	sp|O95208|EPN2_HUMAN Epsin-2 OS=Homo sapiens (Human) OX=9606 GN=EPN2 PE=1 SV=3;sp|O95208-2|EPN2-2_HUMAN Isoform of O95208, Isoform 2 of Epsin-2 OS=Homo sapiens (Human) OX=9606 GN=EPN2 PE=1 SV=3;tr|F6PQP6|F6PQP6_HUMAN Isoform of O95208, ENTH domain-containi	257240	117850	251380	129080	270620	135830	243000	127350	248160	139490	266090	134320	14	17.995	16.9305	17.9797	16.9936	17.9535	16.9818	-1.00743	7.46852	5.15989	17.4724	-22.807	9.80677				keep	3		down	6.1	4	3	7.2	6.1	68.481	0	34.221	192480000	6	641	3	3
O00592;O00592-2;G3V0E6	O00592;O00592-2	Podocalyxin	PODXL	sp|O00592|PODXL_HUMAN Podocalyxin OS=Homo sapiens (Human) OX=9606 GN=PODXL PE=1 SV=2;sp|O00592-2|PODXL-2_HUMAN Isoform of O00592, Isoform 2 of Podocalyxin OS=Homo sapiens (Human) OX=9606 GN=PODXL PE=1 SV=2	816310	384650	795450	400410	798590	398110	771170	414060	785890	432180	785910	393830	3	19.661	18.6371	19.6416	18.6268	19.5147	18.5332	-1.00673	6.5867	4.83565	19.1024	-17.3172	7.74745				keep	11		down	27.2	11	11	27.2	27.2	58.635	0	64.853	2918200000	9	558	9	9
P58317;K7EQI1	P58317;K7EQI1	Zinc finger protein 121	ZNF121	sp|P58317|ZN121_HUMAN Zinc finger protein 121 OS=Homo sapiens (Human) OX=9606 GN=ZNF121 PE=3 SV=2;tr|K7EQI1|K7EQI1_HUMAN Isoform of P58317, C2H2-type domain-containing protein (Fragment) OS=Homo sapiens (Human) OX=9606 GN=ZNF121 PE=1 SV=1	80328	31922	77553	33028	52561	37280	75858	35206	76175	35778	52319	36351	2	16.3158	15.0462	16.2831	15.0271	15.5893	15.1165	-0.999467	3.18335	2.53983	15.563	-5.58388	-0.74789				keep	3		down	11.8	3	3	11.8	11.8	44.694	0	45.943	79664000	2	390	2	2
P0CG31;Q9HBT8;Q9HBT8-2;A0A2Z4LIS9;J3QQV4;J3KRV6;J3KRD3;J3KRF9;J3KSW0;A8MTT8;J3KSJ1	P0CG31;Q9HBT8;Q9HBT8-2;A0A2Z4LIS9	Putative zinc finger protein 286B;Zinc finger protein 286A	ZNF286B;ZNF286A	sp|P0CG31|Z286B_HUMAN Putative zinc finger protein 286B OS=Homo sapiens (Human) OX=9606 GN=ZNF286B PE=5 SV=1;sp|Q9HBT8|Z286A_HUMAN Zinc finger protein 286A OS=Homo sapiens (Human) OX=9606 GN=ZNF286A PE=1 SV=1;sp|Q9HBT8-2|Z286A-2_HUMAN Isoform of Q9HBT8, Is	41838	20334	43193	21708	52492	25885	39528	21825	42639	23686	51471	25620	11	15.3748	14.3955	15.4387	14.4217	15.5874	14.5902	-0.997833	5.7122	4.32239	14.968	-13.1273	5.61352				keep	2		down	4.6	4	2	9.8	4.6	59.571	0	5.4626	18003000	2	522	2	2
Q8TEV9;Q8TEV9-2	Q8TEV9;Q8TEV9-2	Smith-Magenis syndrome chromosomal region candidate gene 8 protein	SMCR8	sp|Q8TEV9|SMCR8_HUMAN Guanine nucleotide exchange protein SMCR8 OS=Homo sapiens (Human) OX=9606 GN=SMCR8 PE=1 SV=2;sp|Q8TEV9-2|SMCR8-2_HUMAN Isoform of Q8TEV9, Isoform 2 of Guanine nucleotide exchange protein SMCR8 OS=Homo sapiens (Human) OX=9606 GN=SMCR8	113670	45631	118310	52484	87881	59562	107350	50337	116050	56775	87286	58171	2	16.8167	15.5616	16.8924	15.6953	16.3308	15.7925	-0.996833	3.78976	2.98677	16.1816	-6.94591	0.783959				keep	3		down	3.2	3	3	3.2	3.2	105.02	0.00012536	3.5437	38286000	3	937	2	2
Q93084;Q93084-2;Q93084-4;Q93084-3;Q93084-7;Q93084-6;Q93084-5	Q93084;Q93084-2;Q93084-4;Q93084-3;Q93084-7;Q93084-6;Q93084-5	Sarcoplasmic/endoplasmic reticulum calcium ATPase 3	ATP2A3	sp|Q93084|AT2A3_HUMAN Sarcoplasmic/endoplasmic reticulum calcium ATPase 3 OS=Homo sapiens (Human) OX=9606 GN=ATP2A3 PE=1 SV=2;sp|Q93084-2|AT2A3-2_HUMAN Isoform of Q93084, Isoform SERCA3A of Sarcoplasmic/endoplasmic reticulum calcium ATPase 3 OS=Homo sapien	43586	20313	41428	22521	47869	22828	41175	21888	40975	24255	47020	22631	7	15.4338	14.394	15.3785	14.4747	15.4544	14.4089	-0.996367	7.18642	5.11295	14.924	-20.8899	9.16058				keep	3		down	2.4	9	3	9.1	2.4	113.98	0.00012649	3.7084	13752000	3	1043	3	3
P05787;CON__sp|P05787|K2C8_HUMAN;P05787-2;F8VUG2;F8W1U3;F8VP67;H0YIB2;F8VQY3	P05787;CON__sp|P05787|K2C8_HUMAN;P05787-2;F8VUG2	Keratin, type II cytoskeletal 8	KRT8	sp|P05787|K2C8_HUMAN Keratin, type II cytoskeletal 8 OS=Homo sapiens (Human) OX=9606 GN=KRT8 PE=1 SV=7;;sp|P05787-2|K2C8-2_HUMAN Isoform of P05787, Isoform 2 of Keratin, type II cytoskeletal 8 OS=Homo sapiens (Human) OX=9606 GN=KRT8 PE=1 SV=7;tr|F8VUG2|F8V	4231900	2257500	4295000	2110700	4870600	2262000	3999100	2394000	4253800	2300100	4775400	2245500	8	22.0351	21.1902	22.0744	21.025	22.1232	21.0395	-0.992667	6.4828	4.78516	21.5812	-16.758	7.49671			+	keep	25		down	44.5	26	23	46.4	40.8	53.704	0	74.376	6468500000	53	483	49	49
Q9UPQ0;Q9UPQ0-2;Q9UPQ0-10;Q9UPQ0-4;D6RD46;Q9UPQ0-3;G5EA03;Q9UPQ0-8;Q9UPQ0-9;E7EPK0;E9PDJ9;Q9UPQ0-6;Q9UPQ0-5;H0Y8P3;Q9UPQ0-7;D6RJ93;D6R8Y0;Q6NVB9;D6RGH8	Q9UPQ0;Q9UPQ0-2;Q9UPQ0-10;Q9UPQ0-4;D6RD46;Q9UPQ0-3;G5EA03;Q9UPQ0-8;Q9UPQ0-9;E7EPK0;E9PDJ9;Q9UPQ0-6;Q9UPQ0-5;H0Y8P3	LIM and calponin homology domains-containing protein 1	LIMCH1	sp|Q9UPQ0|LIMC1_HUMAN LIM and calponin homology domains-containing protein 1 OS=Homo sapiens (Human) OX=9606 GN=LIMCH1 PE=1 SV=4;sp|Q9UPQ0-2|LIMC1-2_HUMAN Isoform of Q9UPQ0, Isoform 2 of LIM and calponin homology domains-containing protein 1 OS=Homo sapien	1654400	794730	1694600	841510	1774900	912050	1563000	854170	1672500	911880	1745600	900940	19	20.6801	19.684	20.7327	19.6983	20.6669	19.7291	-0.989433	7.38405	5.15989	20.1985	-22.2207	9.61633				keep	25		down	31.7	25	25	31.7	31.7	121.87	0	68.63	917460000	26	1083	20	20
Q6UXK5	Q6UXK5	Leucine-rich repeat neuronal protein 1	LRRN1	sp|Q6UXK5|LRRN1_HUMAN Leucine-rich repeat neuronal protein 1 OS=Homo sapiens (Human) OX=9606 GN=LRRN1 PE=1 SV=1	407490	199330	434360	209650	446630	233880	385000	213910	428320	227800	439320	230830	1	18.6586	17.6887	18.7687	17.6933	18.6763	17.7658	-0.985267	6.92082	5.02826	18.2086	-19.221	8.53801				keep	7		down	15.2	7	7	15.2	15.2	80.716	0	28.137	358200000	8	716	8	8
Q9BZA7;Q9BZA7-6;Q9BZA7-7;Q9BZA7-2;Q9BZA7-5;Q9BZA7-4;Q9BZA7-3;Q9BZA7-8;Q9BZA8;Q9BZA8-3;Q9BZA8-2;Q9BZA8-4	Q9BZA7;Q9BZA7-6;Q9BZA7-7;Q9BZA7-2;Q9BZA7-5;Q9BZA7-4;Q9BZA7-3;Q9BZA7-8;Q9BZA8;Q9BZA8-3;Q9BZA8-2;Q9BZA8-4	Protocadherin-11 X-linked;Protocadherin-11 Y-linked	PCDH11X;PCDH11Y	sp|Q9BZA7|PC11X_HUMAN Protocadherin-11 X-linked OS=Homo sapiens (Human) OX=9606 GN=PCDH11X PE=2 SV=1;sp|Q9BZA7-6|PC11X-6_HUMAN Isoform of Q9BZA7, Isoform 6 of Protocadherin-11 X-linked OS=Homo sapiens (Human) OX=9606 GN=PCDH11X PE=2 SV=1;sp|Q9BZA7-7|PC11X-	127130	59477	142960	78359	155510	75932	120100	64285	140750	84044	153010	75191	12	16.9782	15.9439	17.1654	16.2735	17.1542	16.1428	-0.9792	5.04769	3.89764	16.6097	-10.5971	3.95763				keep	4		down	3	4	4	3	3	147.56	0	8.2508	38717000	4	1347	4	4
P35222;A0A2R8Y543;A0A2R8YCH5;A0A2R8Y5A3;A0A2R8Y804;A0A2R8Y750;B4DGU4;A0A2R8Y7Z0;A0A2R8Y5C3;A0A2R8Y5Z1;A0A2R8Y6G0;A0A2R8Y815;A0A2R8YG06	P35222;A0A2R8Y543;A0A2R8YCH5;A0A2R8Y5A3;A0A2R8Y804;A0A2R8Y750;B4DGU4;A0A2R8Y7Z0;A0A2R8Y5C3;A0A2R8Y5Z1;A0A2R8Y6G0	Catenin beta-1	CTNNB1	sp|P35222|CTNB1_HUMAN Catenin beta-1 OS=Homo sapiens (Human) OX=9606 GN=CTNNB1 PE=1 SV=1;tr|A0A2R8Y543|A0A2R8Y543_HUMAN Isoform of P35222, Catenin beta-1 OS=Homo sapiens (Human) OX=9606 GN=CTNNB1 PE=1 SV=1;tr|A0A2R8YCH5|A0A2R8YCH5_HUMAN Isoform of P35222,	5015300	2452000	4774500	2407000	5125300	2653700	4738400	2625500	4726100	2606600	5040600	2620500	13	22.2801	21.3094	22.2271	21.2145	22.1968	21.2699	-0.970067	7.01954	5.0804	21.7496	-19.8287	8.77174				keep	20		down	36.2	23	20	41.4	36.2	85.496	0	104.96	7167000000	36	781	29	29
Q8NEV8;F5GXG5;E9PPH6;Q8NEV8-2;A0A087WZJ0	Q8NEV8;F5GXG5;E9PPH6;Q8NEV8-2	Exophilin-5	EXPH5	sp|Q8NEV8|EXPH5_HUMAN Exophilin-5 OS=Homo sapiens (Human) OX=9606 GN=EXPH5 PE=1 SV=3;tr|F5GXG5|F5GXG5_HUMAN Isoform of Q8NEV8, Exophilin-5 (Fragment) OS=Homo sapiens (Human) OX=9606 GN=EXPH5 PE=1 SV=1;tr|E9PPH6|E9PPH6_HUMAN Isoform of Q8NEV8, Exophilin-5 (	12031	5955.7	13107	5990.7	14160	7991.7	11368	6384.4	12916	6576.6	13920	7861.3	5	13.5767	12.6239	13.7182	12.5642	13.6971	12.8947	-0.969733	5.07417	3.91367	13.1791	-10.6883	4.02365				keep	3		down	2.2	3	3	2.2	2.2	222.52	0	13.994	10134000	3	1989	3	3
Q9UPY5	Q9UPY5	Cystine/glutamate transporter	SLC7A11	sp|Q9UPY5|XCT_HUMAN Cystine/glutamate transporter OS=Homo sapiens (Human) OX=9606 GN=SLC7A11 PE=1 SV=1	47455	17792	44782	17246	21660	19385	44810	19793	43917	18699	21822	18767	1	15.5565	14.2028	15.4908	14.0897	14.3103	14.173	-0.964033	1.87178	1.54379	14.6372	-3.21648	-4.00842				keep	3		down	8.6	3	3	8.6	8.6	55.422	0	8.5232	19921000	2	501	2	2
Q02487;Q02487-2;A0A3B3ISU0	Q02487;Q02487-2;A0A3B3ISU0	Desmocollin-2	DSC2	sp|Q02487|DSC2_HUMAN Desmocollin-2 OS=Homo sapiens (Human) OX=9606 GN=DSC2 PE=1 SV=1;sp|Q02487-2|DSC2-2_HUMAN Isoform of Q02487, Isoform 2B of Desmocollin-2 OS=Homo sapiens (Human) OX=9606 GN=DSC2 PE=1 SV=1;tr|A0A3B3ISU0|A0A3B3ISU0_HUMAN Isoform of Q02487,	70027	31776	62913	34825	64464	33377	66149	34325	62292	37203	63575	32959	3	16.1178	15.0395	15.9812	15.1035	15.8838	14.9569	-0.960967	5.79048	4.35754	15.5138	-13.4649	5.81016				keep	4		down	6.9	4	4	6.9	6.9	99.961	0	27.389	126900000	4	901	3	3
Q8N9U0;Q8N9U0-2;H0YJ73	Q8N9U0;Q8N9U0-2	Tandem C2 domains nuclear protein	TC2N	sp|Q8N9U0|TAC2N_HUMAN Tandem C2 domains nuclear protein OS=Homo sapiens (Human) OX=9606 GN=TC2N PE=1 SV=2;sp|Q8N9U0-2|TAC2N-2_HUMAN Isoform of Q8N9U0, Isoform 2 of Tandem C2 domains nuclear protein OS=Homo sapiens (Human) OX=9606 GN=TC2N PE=1 SV=2	54715	25761	51242	26518	49621	26521	51689	27712	50699	28478	48950	26151	3	15.7619	14.7368	15.6852	14.7104	15.5062	14.6252	-0.9603	5.71444	4.32239	15.171	-13.1378	5.61971				keep	3		down	6.7	3	3	6.7	6.7	55.284	0	7.4059	46089000	3	490	2	2
Q9Y693	Q9Y693	Lipoma HMGIC fusion partner	LHFP	sp|Q9Y693|LHPL6_HUMAN LHFPL tetraspan subfamily member 6 protein OS=Homo sapiens (Human) OX=9606 GN=LHFPL6 PE=2 SV=1	85400	42805	88476	45729	94942	48049	80690	45764	87433	49366	93383	47498	1	16.4042	15.4694	16.4732	15.4965	16.4423	15.4826	-0.957067	7.33068	5.15989	15.9614	-21.8547	9.4943				keep	2		down	13.5	2	2	13.5	13.5	21.598	0	6.1713	37067000	3	200	3	3
Q9UBG0;E7EME3	Q9UBG0	C-type mannose receptor 2	MRC2	sp|Q9UBG0|MRC2_HUMAN C-type mannose receptor 2 OS=Homo sapiens (Human) OX=9606 GN=MRC2 PE=1 SV=2	90447	40833	84926	43198	85403	48853	85438	44178	83898	46581	84251	48028	2	16.487	15.4013	16.4141	15.4144	16.2896	15.5065	-0.956167	6.14448	4.57512	15.9188	-15.0599	6.67569				keep	7		down	8.3	7	7	8.3	8.3	166.67	0	19.107	83445000	7	1479	6	6
P31314	P31314	T-cell leukemia homeobox protein 1	TLX1	sp|P31314|TLX1_HUMAN T-cell leukemia homeobox protein 1 OS=Homo sapiens (Human) OX=9606 GN=TLX1 PE=1 SV=1	125830	58737	110430	62004	126170	64064	118870	63180	109540	66485	124150	63319	1	16.9633	15.9259	16.7929	15.9358	16.8526	15.8976	-0.949833	6.55284	4.82974	16.3947	-17.1339	7.66628				keep	2		down	7.3	2	2	7.3	7.3	34.364	0.00012606	3.64	70038000	2	330	2	2
Q9NP84;I3L1J9;Q9NP84-2	Q9NP84;I3L1J9;Q9NP84-2	Tumor necrosis factor receptor superfamily member 12A	TNFRSF12A	sp|Q9NP84|TNR12_HUMAN Tumor necrosis factor receptor superfamily member 12A OS=Homo sapiens (Human) OX=9606 GN=TNFRSF12A PE=1 SV=1;tr|I3L1J9|I3L1J9_HUMAN Isoform of Q9NP84, Tumor necrosis factor receptor superfamily member 12A OS=Homo sapiens (Human) OX=96	127270	62700	123270	60560	131730	72562	120240	67093	121950	65796	129630	71453	3	16.9798	16.0201	16.9516	15.9018	16.9148	16.0773	-0.949	6.4437	4.767	16.4742	-16.5512	7.40162				keep	2		down	23.3	2	2	23.3	23.3	13.911	0	14.495	69930000	2	129	2	2
A6NDB9;K7EKN5;A0A590UJ23;A0A590UJ36	A6NDB9;K7EKN5;A0A590UJ23;A0A590UJ36	Paralemmin-3	PALM3	sp|A6NDB9|PALM3_HUMAN Paralemmin-3 OS=Homo sapiens (Human) OX=9606 GN=PALM3 PE=1 SV=2;tr|K7EKN5|K7EKN5_HUMAN Isoform of A6NDB9, Paralemmin-3 OS=Homo sapiens (Human) OX=9606 GN=PALM3 PE=1 SV=2;tr|A0A590UJ23|A0A590UJ23_HUMAN Isoform of A6NDB9, Paralemmin-3 O	1571200	777520	1575900	805480	1696900	896620	1484500	832090	1558100	870820	1669700	884500	4	20.6057	19.6524	20.6279	19.6352	20.6021	19.7045	-0.947867	7.28233	5.11976	20.138	-21.5259	9.38258				keep	20		down	37.7	20	20	37.7	37.7	71.695	0	72.208	1212500000	23	673	22	22
P09471-2;P09471;H3BTM2;A0A1W2PP87;A0A1W2PRJ7;A0A1W2PS82;A0A1W2PP38;P19087;A8MTJ3;P11488;A0A1W2PRE1;A2A2R6;A0A1W2PQK2;A0A087WTB6;A0A087WZE5	P09471-2;P09471	Guanine nucleotide-binding protein G(o) subunit alpha	GNAO1	sp|P09471-2|GNAO-2_HUMAN Isoform of P09471, Isoform Alpha-2 of Guanine nucleotide-binding protein G(o) subunit alpha OS=Homo sapiens (Human) OX=9606 GN=GNAO1 PE=1 SV=4;sp|P09471|GNAO_HUMAN Guanine nucleotide-binding protein G(o) subunit alpha OS=Homo sapie	617810	262170	589440	298070	491530	307170	583510	286240	580950	318890	487600	300910	15	19.259	18.084	19.2092	18.201	18.8145	18.159	-0.946233	4.32514	3.38243	18.6211	-8.34573	2.13872				keep	7		down	27.7	12	7	40.7	27.7	40.086	0	33.519	432980000	9	354	7	7
P23508;P23508-2;A0A096LNU0;D6REY2;A0A096LPB3	P23508;P23508-2;A0A096LNU0;D6REY2	Colorectal mutant cancer protein	MCC	sp|P23508|CRCM_HUMAN Colorectal mutant cancer protein OS=Homo sapiens (Human) OX=9606 GN=MCC PE=1 SV=2;sp|P23508-2|CRCM-2_HUMAN Isoform of P23508, Isoform 2 of Colorectal mutant cancer protein OS=Homo sapiens (Human) OX=9606 GN=MCC PE=1 SV=2;tr|A0A096LNU0|	18170	9350.3	19814	9846.6	21877	11482	17169	9973.9	19559	10700	21504	11331	5	14.1715	13.2747	14.3144	13.2811	14.3247	13.4174	-0.9458	6.07007	4.53462	13.7973	-14.7097	6.49408				keep	3		down	3.9	3	3	3.9	3.9	93.026	0.00012999	4.2825	14000000	3	829	3	3
P05783;F8VZY9;CON__sp|P05784|K1C18_MOUSE	P05783;F8VZY9	Keratin, type I cytoskeletal 18	KRT18	sp|P05783|K1C18_HUMAN Keratin, type I cytoskeletal 18 OS=Homo sapiens (Human) OX=9606 GN=KRT18 PE=1 SV=2;tr|F8VZY9|F8VZY9_HUMAN Isoform of P05783, IF rod domain-containing protein OS=Homo sapiens (Human) OX=9606 GN=KRT18 PE=1 SV=1	3357200	1803000	3408600	1769200	3606900	1760000	3172600	1910600	3378100	1907400	3547000	1742900	3	21.701	20.8659	21.7409	20.7704	21.6899	20.6775	-0.939333	6.36653	4.70774	21.2409	-16.1567	7.21665				keep	20		down	57.7	20	17	57.7	51.9	48.057	0	72.679	5263200000	34	430	30	30
Q8IV08;M0R1F7;M0R2E7;M0QY94;M0R3G9;M0QX50;M0R2W7;M0QX99;A0A0A0MS28;E2QRG1	Q8IV08	Phospholipase D3	PLD3	sp|Q8IV08|PLD3_HUMAN 5-3 exonuclease PLD3 OS=Homo sapiens (Human) OX=9606 GN=PLD3 PE=1 SV=1	1038700	515570	1055100	510170	993880	566060	981360	551680	1042500	551780	980690	556610	10	20.0086	19.0597	20.0491	18.9763	19.8303	19.041	-0.937	5.93181	4.45223	19.4942	-14.0851	6.15874				keep	9		down	26.5	9	9	26.5	26.5	54.705	0	29.246	788910000	13	490	12	12
Q70EL1;Q70EL1-7;Q70EL1-10;Q70EL1-8;H7C296;R4GN32;H7C1E9;Q70EL1-9;Q70EL1-6	Q70EL1;Q70EL1-7;Q70EL1-10;Q70EL1-8	Inactive ubiquitin carboxyl-terminal hydrolase 54	USP54	sp|Q70EL1|UBP54_HUMAN Inactive ubiquitin carboxyl-terminal hydrolase 54 OS=Homo sapiens (Human) OX=9606 GN=USP54 PE=1 SV=4;sp|Q70EL1-7|UBP54-7_HUMAN Isoform of Q70EL1, Isoform 4 of Inactive ubiquitin carboxyl-terminal hydrolase 54 OS=Homo sapiens (Human) O	59521	28358	54926	29577	63810	34171	56231	30449	54409	31907	62774	33691	9	15.8833	14.8754	15.7854	14.8679	15.8691	14.9909	-0.934533	6.53165	4.81531	15.3787	-17.0144	7.61279				keep	5		down	4.6	5	5	4.6	4.6	187.39	0	9.106	33832000	5	1684	5	5
Q04756;D6RAR4	Q04756;D6RAR4	Hepatocyte growth factor activator;Hepatocyte growth factor activator short chain;Hepatocyte growth factor activator long chain	HGFAC	sp|Q04756|HGFA_HUMAN Hepatocyte growth factor activator OS=Homo sapiens (Human) OX=9606 GN=HGFAC PE=1 SV=1;tr|D6RAR4|D6RAR4_HUMAN Isoform of Q04756, Hepatocyte growth factor activator OS=Homo sapiens (Human) OX=9606 GN=HGFAC PE=1 SV=1	327240	181220	343280	174280	381950	188480	309270	191450	340130	188930	375160	186540	2	18.3422	17.5513	18.4292	17.4268	18.4506	17.4544	-0.929833	6.51286	4.8041	17.9424	-16.9195	7.57005				keep	4		down	7.6	4	4	7.6	7.6	70.681	0	25.127	262740000	4	655	4	4
P06702	P06702	Protein S100-A9	S100A9	sp|P06702|S10A9_HUMAN Protein S100-A9 OS=Homo sapiens (Human) OX=9606 GN=S100A9 PE=1 SV=1	25043	15673	28294	15015	24369	10187	23677	16355	28091	15987	24031	10171	1	14.6343	14.0199	14.8284	13.8898	14.4803	13.2448	-0.9295	2.77935	2.24647	14.1829	-4.78357	-1.7634				keep	2		down	26.3	2	2	26.3	26.3	13.242	0	8.3524	17367000	2	114	2	2
Q13472;Q13472-3;Q13472-2;K7EMT6;K7ELI7	Q13472;Q13472-3;Q13472-2	DNA topoisomerase 3-alpha	TOP3A	sp|Q13472|TOP3A_HUMAN DNA topoisomerase 3-alpha OS=Homo sapiens (Human) OX=9606 GN=TOP3A PE=1 SV=1;sp|Q13472-3|TOP3A-3_HUMAN Isoform of Q13472, Isoform 3 of DNA topoisomerase 3-alpha OS=Homo sapiens (Human) OX=9606 GN=TOP3A PE=1 SV=1;sp|Q13472-2|TOP3A-2_HU	593530	309860	606430	299050	587240	319810	560850	329500	600080	323060	578910	315080	5	19.2012	18.3251	19.2501	18.2057	19.0712	18.2172	-0.924833	6.06449	4.53313	18.7118	-14.6844	6.48082				keep	15		down	21.3	15	14	21.3	20.2	112.37	0	41.94	284880000	16	1001	16	16
O75147;O75147-1;A6NN50;O75147-2;O75147-4;A8MSZ8	O75147;O75147-1;A6NN50;O75147-2;O75147-4;A8MSZ8	Obscurin-like protein 1	OBSL1	sp|O75147|OBSL1_HUMAN Obscurin-like protein 1 OS=Homo sapiens (Human) OX=9606 GN=OBSL1 PE=1 SV=4;sp|O75147-1|OBSL1-1_HUMAN Isoform of O75147, Isoform 3 of Obscurin-like protein 1 OS=Homo sapiens (Human) OX=9606 GN=OBSL1 PE=1 SV=4;tr|A6NN50|A6NN50_HUMAN Iso	768980	400150	817770	419850	889490	467140	726640	426020	808360	453980	875070	460990	6	19.5748	18.6941	19.6815	18.6952	19.6702	18.7639	-0.924433	6.75203	4.93554	19.18	-18.2401	8.14231				keep	14		down	10.1	14	14	10.1	10.1	206.94	0	84.594	363630000	14	1896	14	14
P51991;H7C1J8	P51991	Heterogeneous nuclear ribonucleoprotein A3	HNRNPA3	sp|P51991|ROA3_HUMAN Heterogeneous nuclear ribonucleoprotein A3 OS=Homo sapiens (Human) OX=9606 GN=HNRNPA3 PE=1 SV=2	14798000	6748500	13064000	5028100	7509700	6011400	13979000	7282400	12909000	5484500	7507700	5838800	2	23.8411	22.77	23.6793	22.2773	22.7479	22.4496	-0.9238	1.97264	1.62316	22.9609	-3.37845	-3.76277				keep	27		down	66.9	27	3	66.9	6.6	39.594	0	323.31	33657000000	82	378	61	61
Q8N4C8;Q8N4C8-3;Q8N4C8-2;Q8N4C8-5;Q8N4C8-4;A0A590UJE1;I3L2I2	Q8N4C8;Q8N4C8-3;Q8N4C8-2;Q8N4C8-5;Q8N4C8-4	Misshapen-like kinase 1	MINK1	sp|Q8N4C8|MINK1_HUMAN Misshapen-like kinase 1 OS=Homo sapiens (Human) OX=9606 GN=MINK1 PE=1 SV=2;sp|Q8N4C8-3|MINK1-3_HUMAN Isoform of Q8N4C8, Isoform 2 of Misshapen-like kinase 1 OS=Homo sapiens (Human) OX=9606 GN=MINK1 PE=1 SV=2;sp|Q8N4C8-2|MINK1-2_HUMAN	119280	51031	117350	63499	123060	75254	112660	55688	115650	68112	121600	73782	7	16.8862	15.723	16.8806	15.9702	16.8166	16.1298	-0.920133	4.70774	3.65902	16.4011	-9.482	3.10506				keep	5		down	4.4	11	5	9.9	4.4	149.82	0	17.419	48981000	5	1332	5	5
Q8WTT2	Q8WTT2	Nucleolar complex protein 3 homolog	NOC3L	sp|Q8WTT2|NOC3L_HUMAN Nucleolar complex protein 3 homolog OS=Homo sapiens (Human) OX=9606 GN=NOC3L PE=1 SV=1	3094200	1515900	2946100	1409600	2483500	1504100	2923400	1622700	2915200	1518600	2458500	1475300	1	21.5834	20.6156	21.5305	20.4426	21.1515	20.4508	-0.9188	4.19382	3.28746	20.9624	-7.98303	1.80651				keep	17		down	27.4	17	17	27.4	27.4	92.547	0	75.835	2221300000	28	800	27	27
O60716;O60716-3;O60716-5;C9JZR2;O60716-2;O60716-6;O60716-4;O60716-9;O60716-7;O60716-10;O60716-11;O60716-13;O60716-8;O60716-18;O60716-17;O60716-15;O60716-12;O60716-19;O60716-14;O60716-21;O60716-16;O60716-20;O60716-23;O60716-22;O60716-24;O60716-25;O60716-29;O60716-27;O60716-26;O60716-28;O60716-30;O60716-31;O60716-32;E9PRE2;E9PKY0;H0YC95;E9PKL1	O60716;O60716-3;O60716-5;C9JZR2;O60716-2;O60716-6;O60716-4;O60716-9;O60716-7;O60716-10;O60716-11;O60716-13;O60716-8;O60716-18;O60716-17;O60716-15;O60716-12;O60716-19;O60716-14;O60716-21;O60716-16;O60716-20;O60716-23;O60716-22;O60716-24;O60716-25;O60716-29;O60716-27;O60716-26;O60716-28;O60716-30;O60716-31;O60716-32	Catenin delta-1	CTNND1	sp|O60716|CTND1_HUMAN Catenin delta-1 OS=Homo sapiens (Human) OX=9606 GN=CTNND1 PE=1 SV=1;sp|O60716-3|CTND1-3_HUMAN Isoform of O60716, Isoform 1AC of Catenin delta-1 OS=Homo sapiens (Human) OX=9606 GN=CTNND1 PE=1 SV=1;sp|O60716-5|CTND1-5_HUMAN Isoform of O	4230400	2095600	4217400	2043100	3869500	2293800	3996900	2241700	4168900	2206500	3823000	2251800	37	22.0346	21.0828	22.0481	20.9781	21.7913	21.0597	-0.9178	5.41117	4.12148	21.4991	-11.9194	4.86588				keep	37		down	55	37	36	55	53.2	108.17	0	227.7	5634000000	55	968	53	50
O00622	O00622	Protein CYR61	CYR61	sp|O00622|CCN1_HUMAN CCN family member 1 OS=Homo sapiens (Human) OX=9606 GN=CCN1 PE=1 SV=1	623700	317240	625020	331980	700740	373150	589320	338320	618720	358050	689580	368010	1	19.2727	18.3591	19.2937	18.3565	19.3261	18.4398	-0.912367	6.95861	5.04818	18.8413	-19.4494	8.62683				keep	12		down	34.1	12	12	34.1	34.1	42.026	0	36.477	387200000	12	381	12	12
A0A0B4J2A0;Q9UHJ6	A0A0B4J2A0;Q9UHJ6	Sedoheptulokinase	TRPV1;SHPK	tr|A0A0B4J2A0|A0A0B4J2A0_HUMAN ENSG00000262304 readthrough, FGGY_N domain-containing protein OS=Homo sapiens (Human) OX=9606 GN=ENSG00000262304 PE=1 SV=1;sp|Q9UHJ6|SHPK_HUMAN Sedoheptulokinase OS=Homo sapiens (Human) OX=9606 GN=SHPK PE=1 SV=3	423540	212890	431760	238840	484520	251810	400180	227450	427170	256330	476970	248590	2	18.7144	17.7836	18.76	17.8814	18.7938	17.8723	-0.9103	6.76195	4.93554	18.3009	-18.2989	8.16668				keep	10		down	31.4	10	9	31.4	30.8	51.504	0	49.637	435460000	11	478	9	9
Q9H6Y7;I3L0L6;I3L2Y3	Q9H6Y7;I3L0L6;I3L2Y3	E3 ubiquitin-protein ligase RNF167	RNF167	sp|Q9H6Y7|RN167_HUMAN E3 ubiquitin-protein ligase RNF167 OS=Homo sapiens (Human) OX=9606 GN=RNF167 PE=1 SV=1;tr|I3L0L6|I3L0L6_HUMAN Isoform of Q9H6Y7, RING-type domain-containing protein OS=Homo sapiens (Human) OX=9606 GN=RNF167 PE=1 SV=1;tr|I3L2Y3|I3L2Y3_	68110	30073	63322	30703	51357	34710	64334	32630	62508	32977	51008	33903	3	16.0778	14.9601	15.9906	14.9218	15.5559	15.0134	-0.909667	3.89305	3.06435	15.4199	-7.20019	1.04524				keep	2		down	8.6	2	2	8.6	8.6	38.298	0	10.077	70088000	2	350	2	2
Q8N442	Q8N442	Translation factor GUF1, mitochondrial	GUF1	sp|Q8N442|GUF1_HUMAN Translation factor GUF1, mitochondrial OS=Homo sapiens (Human) OX=9606 GN=GUF1 PE=1 SV=1	934530	457450	911680	478840	922150	521430	882930	489980	902080	514460	910000	512880	1	19.8561	18.8871	19.8383	18.8849	19.7222	18.9225	-0.907367	6.61798	4.84771	19.3518	-17.4852	7.82108				keep	18		down	40.2	18	18	40.2	40.2	74.327	0	74.983	705440000	20	669	20	20
Q86US8;Q86US8-3;Q86US8-2;K7EKV2;K7ENH7;I3L3A9;I3L355;K7ELM2;I3L176;I3L421;I3L1W8;I3L390	Q86US8	Telomerase-binding protein EST1A	SMG6	sp|Q86US8|EST1A_HUMAN Telomerase-binding protein EST1A OS=Homo sapiens (Human) OX=9606 GN=SMG6 PE=1 SV=2	559640	311510	625980	316610	697500	360960	528920	329110	619030	343440	685540	356450	12	19.1164	18.3328	19.2959	18.2881	19.3194	18.3918	-0.906333	5.85699	4.4034	18.7907	-13.7436	5.9688				keep	17		down	15.3	17	17	15.3	15.3	160.46	0	61.34	300020000	19	1419	19	18
P10909;P10909-4;P10909-6;P10909-5;P10909-2;E7ERK6;H0YLK8;P10909-3;E5RG36;E5RGB0;E5RH61;E5RJZ5;H0YAS8;E7ETB4;H0YC35	P10909;P10909-4;P10909-6;P10909-5;P10909-2;E7ERK6;H0YLK8;P10909-3	Clusterin;Clusterin beta chain;Clusterin alpha chain	CLU	sp|P10909|CLUS_HUMAN Clusterin OS=Homo sapiens (Human) OX=9606 GN=CLU PE=1 SV=1;sp|P10909-4|CLUS-4_HUMAN Isoform of P10909, Isoform 4 of Clusterin OS=Homo sapiens (Human) OX=9606 GN=CLU PE=1 SV=1;sp|P10909-6|CLUS-6_HUMAN Isoform of P10909, Isoform 6 of Clu	348330	173240	358860	192180	379860	209260	329110	185380	354710	206450	374500	206060	15	18.4323	17.4863	18.4932	17.5678	18.4427	17.6053	-0.902933	6.70774	4.89963	18.0046	-17.986	8.03587				keep	5		down	13.4	5	5	13.4	13.4	52.494	0	13.432	166120000	5	449	5	5
Q9NWA0;J3KTK5	Q9NWA0;J3KTK5	Mediator of RNA polymerase II transcription subunit 9	MED9	sp|Q9NWA0|MED9_HUMAN Mediator of RNA polymerase II transcription subunit 9 OS=Homo sapiens (Human) OX=9606 GN=MED9 PE=1 SV=1;tr|J3KTK5|J3KTK5_HUMAN Isoform of Q9NWA0, Mediator complex subunit 9 OS=Homo sapiens (Human) OX=9606 GN=MED9 PE=1 SV=1	240300	101090	223530	104400	158760	118690	226950	110450	220270	112040	158390	115530	2	17.8967	16.7092	17.8103	16.6875	17.1841	16.7872	-0.9024	3.04025	2.4365	17.1792	-5.29162	-1.10826				keep	3		down	33.6	3	3	33.6	33.6	16.403	0	6.6033	112670000	3	146	3	3
Q8TF76;Q8TF76-2	Q8TF76	Serine/threonine-protein kinase haspin	GSG2	sp|Q8TF76|HASP_HUMAN Serine/threonine-protein kinase haspin OS=Homo sapiens (Human) OX=9606 GN=HASPIN PE=1 SV=3	139230	70410	135420	69735	137120	77509	131550	75100	134120	74940	135250	76179	2	17.1093	16.1874	17.0872	16.1053	16.9727	16.1724	-0.901367	6.44129	4.767	16.6057	-16.5404	7.39665				keep	6		down	10.3	6	6	10.3	10.3	88.494	0	18.556	89808000	7	798	7	7
O75352;J3QS48;I3L295;J3KT75;J3QW43;J3QRD5;O75352-2;I3L1D2;J3KTK8;J3QQZ4;J3KSI4;I3L405;I3L261;I3L4E0	O75352;J3QS48;I3L295;J3KT75;J3QW43;J3QRD5;O75352-2;I3L1D2;J3KTK8;J3QQZ4	Mannose-P-dolichol utilization defect 1 protein	MPDU1	sp|O75352|MPU1_HUMAN Mannose-P-dolichol utilization defect 1 protein OS=Homo sapiens (Human) OX=9606 GN=MPDU1 PE=1 SV=2;tr|J3QS48|J3QS48_HUMAN Isoform of O75352, Mannose-P-dolichol utilization defect 1 protein OS=Homo sapiens (Human) OX=9606 GN=MPDU1 PE=1	209320	108690	216850	125000	250680	124740	197800	115690	214740	133700	246660	123410	14	17.6976	16.8137	17.7665	16.9473	17.8431	16.8589	-0.895767	6.18977	4.60206	17.3212	-15.2785	6.78675				keep	3		down	16.6	3	3	16.6	16.6	26.638	0	10.809	326640000	4	247	3	3
P22413;E9PE72	P22413;E9PE72	Ectonucleotide pyrophosphatase/phosphodiesterase family member 1;Alkaline phosphodiesterase I;Nucleotide pyrophosphatase	ENPP1	sp|P22413|ENPP1_HUMAN Ectonucleotide pyrophosphatase/phosphodiesterase family member 1 OS=Homo sapiens (Human) OX=9606 GN=ENPP1 PE=1 SV=2;tr|E9PE72|E9PE72_HUMAN Isoform of P22413, Ectonucleotide pyrophosphatase/phosphodiesterase family member 1 OS=Homo sap	171880	87118	168970	82363	150210	91562	162410	92914	167230	88754	148600	89782	2	17.4133	16.4946	17.4066	16.3454	17.1042	16.4128	-0.890433	4.81531	3.73798	16.8628	-9.82425	3.37606				keep	6		down	10.4	6	6	10.4	10.4	104.92	0	37.982	49382000	4	925	4	4
Q7Z6I8;Q7Z6I8-2;H0YAE0	Q7Z6I8;Q7Z6I8-2;H0YAE0	UPF0461 protein C5orf24	C5orf24	sp|Q7Z6I8|CE024_HUMAN UPF0461 protein C5orf24 OS=Homo sapiens (Human) OX=9606 GN=C5orf24 PE=1 SV=1;sp|Q7Z6I8-2|CE024-2_HUMAN Isoform of Q7Z6I8, Isoform 2 of UPF0461 protein C5orf24 OS=Homo sapiens (Human) OX=9606 GN=C5orf24 PE=1 SV=1;tr|H0YAE0|H0YAE0_HUMAN	94003	41031	86527	37928	55691	44249	88790	44583	85346	40864	55691	42988	3	16.5427	15.4083	16.441	15.2267	15.6727	15.3637	-0.8859	2.48543	2.02228	15.7758	-4.24557	-2.49751				keep	2		down	17	2	2	17	17	20.132	0	9.0188	118060000	2	188	2	2
Q9NX00	Q9NX00	Transmembrane protein 160	TMEM160	sp|Q9NX00|TM160_HUMAN Transmembrane protein 160 OS=Homo sapiens (Human) OX=9606 GN=TMEM160 PE=1 SV=1	189160	85243	192140	87058	138470	103230	178680	92400	189200	93826	137990	100490	1	17.5515	16.4632	17.592	16.4254	16.9868	16.5859	-0.885267	3.28578	2.61144	16.9341	-5.79944	-0.489607				keep	3		down	22.9	3	3	22.9	22.9	19.657	0	12.168	172440000	2	188	2	2
P43034;I3L3N5;P43034-2;I3L495	P43034	Platelet-activating factor acetylhydrolase IB subunit alpha	PAFAH1B1	sp|P43034|LIS1_HUMAN Platelet-activating factor acetylhydrolase IB subunit alpha OS=Homo sapiens (Human) OX=9606 GN=PAFAH1B1 PE=1 SV=2	2372200	1236900	2492800	1377100	2932400	1566900	2241600	1316300	2466700	1481900	2885300	1545100	4	21.2	20.3222	21.2895	20.4089	21.3912	20.5098	-0.879933	5.5867	4.24795	20.8536	-12.6083	5.30101				keep	14		down	41.5	14	14	41.5	41.5	46.637	0	56.336	2957400000	24	410	23	23
Q6ZQX7;Q6ZQX7-4;Q6ZQX7-2;Q6ZQX7-3;I3L0T0;H7C5B9	Q6ZQX7;Q6ZQX7-4;Q6ZQX7-2;Q6ZQX7-3	Protein LIAT1	LIAT1	sp|Q6ZQX7|LIAT1_HUMAN Protein LIAT1 OS=Homo sapiens (Human) OX=9606 GN=LIAT1 PE=2 SV=2;sp|Q6ZQX7-4|LIAT1-4_HUMAN Isoform of Q6ZQX7, Isoform 4 of Protein LIAT1 OS=Homo sapiens (Human) OX=9606 GN=LIAT1 PE=4 SV=2;sp|Q6ZQX7-2|LIAT1-2_HUMAN Isoform of Q6ZQX7, I	530970	289980	550190	292490	662500	358630	501800	306780	545320	316690	651290	353420	6	19.0405	18.2295	19.1097	18.1737	19.2451	18.3825	-0.869867	5.31069	4.0655	18.6968	-11.5413	4.61645				keep	3		down	29.4	3	3	29.4	29.4	49.655	0.00012736	3.8255	310830000	3	453	3	3
O95905;O95905-3;O95905-2;C9J316;C9JGV1;F2Z2R1	O95905;O95905-3;O95905-2;C9J316	Protein SGT1	ECD	sp|O95905|ECD_HUMAN Protein ecdysoneless homolog OS=Homo sapiens (Human) OX=9606 GN=ECD PE=1 SV=1;sp|O95905-3|ECD-3_HUMAN Isoform of O95905, Isoform 3 of Protein ecdysoneless homolog OS=Homo sapiens (Human) OX=9606 GN=ECD PE=1 SV=1;sp|O95905-2|ECD-2_HUMAN	1182000	647790	1325100	682330	1427300	795780	1117100	686080	1309900	737230	1405900	783210	6	20.195	19.3891	20.3778	19.3958	20.3524	19.5324	-0.8693	5.64397	4.27984	19.8738	-12.8422	5.4434				keep	14		down	29.3	14	14	29.3	29.3	72.757	0	37.787	801710000	16	644	15	15
Q9P2R3;Q9P2R3-2;Q9P2R3-4;I3L3P8;I3L1Z9;K7EPT2	Q9P2R3;Q9P2R3-2;Q9P2R3-4	Rabankyrin-5	ANKFY1	sp|Q9P2R3|ANFY1_HUMAN Rabankyrin-5 OS=Homo sapiens (Human) OX=9606 GN=ANKFY1 PE=1 SV=2;sp|Q9P2R3-2|ANFY1-2_HUMAN Isoform of Q9P2R3, Isoform 2 of Rabankyrin-5 OS=Homo sapiens (Human) OX=9606 GN=ANKFY1 PE=1 SV=2;sp|Q9P2R3-4|ANFY1-4_HUMAN Isoform of Q9P2R3, I	1173800	608830	1145400	604420	1183500	681070	1109200	647390	1135500	649720	1167900	669410	6	20.185	19.2996	20.1676	19.2209	20.0822	19.3078	-0.868833	6.52288	4.81248	19.7105	-16.9705	7.59308				keep	22		down	28.1	22	22	28.1	28.1	128.4	0	98.917	969080000	21	1169	20	20
Q14978-3;S4R341	Q14978-3	Nucleolar and coiled-body phosphoprotein 1	NOLC1	sp|Q14978-3|NOLC1-3_HUMAN Isoform of Q14978, Isoform 3 of Nucleolar and coiled-body phosphoprotein 1 OS=Homo sapiens (Human) OX=9606 GN=NOLC1 PE=1 SV=2	3241000	1697300	2896300	1598600	3131500	1726100	3062600	1799900	2882300	1713000	3087900	1699700	2	21.6502	20.7787	21.506	20.6241	21.486	20.6495	-0.8633	5.7122	4.32239	21.1157	-13.1278	5.61381				keep	20		down	26.6	20	1	26.6	3.4	73.744	0	86.924	21299000000	23	700	18	18
Q8N8L6	Q8N8L6	ADP-ribosylation factor-like protein 10	ARL10	sp|Q8N8L6|ARL10_HUMAN ADP-ribosylation factor-like protein 10 OS=Homo sapiens (Human) OX=9606 GN=ARL10 PE=2 SV=1	242630	128950	243170	132270	264620	147520	229280	136770	241120	142040	260870	145190	1	17.9106	17.0603	17.9318	17.0289	17.9211	17.1009	-0.8578	6.97469	5.05601	17.4923	-19.5542	8.66719				keep	5		down	32	5	5	32	32	27.459	0	37.34	126800000	7	244	7	7
Q53F19;Q53F19-2	Q53F19;Q53F19-2	Uncharacterized protein C17orf85	C17orf85	sp|Q53F19|NCBP3_HUMAN Nuclear cap-binding protein subunit 3 OS=Homo sapiens (Human) OX=9606 GN=NCBP3 PE=1 SV=2;sp|Q53F19-2|NCBP3-2_HUMAN Isoform of Q53F19, Isoform 2 of Nuclear cap-binding protein subunit 3 OS=Homo sapiens (Human) OX=9606 GN=NCBP3 PE=1 SV=	1050300	554140	1028100	541170	1063300	617790	992500	588050	1019700	581950	1049400	606970	2	20.0246	19.1638	20.0117	19.0614	19.9277	19.1671	-0.857233	6.37059	4.70997	19.5594	-16.1767	7.22614				keep	8		down	14	8	8	14	14	70.592	0	14.035	882230000	12	620	11	11
P98155;P98155-2;Q5VVF8	P98155;P98155-2	Very low-density lipoprotein receptor	VLDLR	sp|P98155|VLDLR_HUMAN Very low-density lipoprotein receptor OS=Homo sapiens (Human) OX=9606 GN=VLDLR PE=1 SV=1;sp|P98155-2|VLDLR-2_HUMAN Isoform of P98155, Isoform Short of Very low-density lipoprotein receptor OS=Homo sapiens (Human) OX=9606 GN=VLDLR PE=1	477120	247380	497110	272740	531280	303710	450840	263390	491930	292320	524260	298600	3	18.8862	18.0003	18.9634	18.0729	18.9267	18.1427	-0.853467	6.33913	4.69037	18.4987	-16.014	7.14851				keep	18		down	26.7	18	18	26.7	26.7	96.098	0	79.731	267120000	16	873	14	14
Q6P6C2;Q6P6C2-1;Q6P6C2-3;K7ER58	Q6P6C2;Q6P6C2-1;Q6P6C2-3	RNA demethylase ALKBH5	ALKBH5	sp|Q6P6C2|ALKB5_HUMAN RNA demethylase ALKBH5 OS=Homo sapiens (Human) OX=9606 GN=ALKBH5 PE=1 SV=2;sp|Q6P6C2-1|ALKB5-1_HUMAN Isoform of Q6P6C2, Isoform 1 of RNA demethylase ALKBH5 OS=Homo sapiens (Human) OX=9606 GN=ALKBH5 PE=1 SV=2;sp|Q6P6C2-3|ALKB5-3_HUMAN	235200	120360	238400	122970	230950	142300	222240	128290	235900	132150	228380	139470	4	17.8658	16.9609	17.9032	16.9237	17.7248	17.0489	-0.853433	5.8041	4.36653	17.4046	-13.5214	5.84259				keep	8		down	35	8	8	35	35	44.255	0	58.517	335150000	10	394	9	9
Q8TCT0;Q8TCT0-2	Q8TCT0;Q8TCT0-2	Ceramide kinase	CERK	sp|Q8TCT0|CERK1_HUMAN Ceramide kinase OS=Homo sapiens (Human) OX=9606 GN=CERK PE=1 SV=1;sp|Q8TCT0-2|CERK1-2_HUMAN Isoform of Q8TCT0, Isoform 2 of Ceramide kinase OS=Homo sapiens (Human) OX=9606 GN=CERK PE=1 SV=1	98251	45960	97267	44542	66540	50526	92812	49538	95901	47803	66440	49156	2	16.6064	15.572	16.6098	15.4586	15.9295	15.5551	-0.853333	2.86898	2.31132	15.9552	-4.95465	-1.53867				keep	3		down	7.3	3	3	7.3	7.3	59.977	0	9.6329	35107000	3	537	2	3
P55769;A0A3B3IUA2;B1AHD1	P55769;A0A3B3IUA2;B1AHD1	NHP2-like protein 1;NHP2-like protein 1, N-terminally processed	NHP2L1	sp|P55769|NH2L1_HUMAN NHP2-like protein 1 OS=Homo sapiens (Human) OX=9606 GN=SNU13 PE=1 SV=3;tr|A0A3B3IUA2|A0A3B3IUA2_HUMAN Isoform of P55769, Ribonucloprotein OS=Homo sapiens (Human) OX=9606 GN=SNU13 PE=1 SV=1;tr|B1AHD1|B1AHD1_HUMAN Isoform of P55769, Rib	528190	258520	463130	206450	320130	239680	499030	276360	459290	222560	319240	233290	3	19.0329	18.0638	18.8612	17.6712	18.1959	17.8011	-0.8513	2.38994	1.95128	18.271	-4.07776	-2.73484				keep	7		down	47.7	7	4	47.7	25.8	14.173	0	28.707	5665500000	8	128	6	6
P57678;I3L2C7;I3L399;I3L4A4	P57678;I3L2C7	Gem-associated protein 4	GEMIN4	sp|P57678|GEMI4_HUMAN Gem-associated protein 4 OS=Homo sapiens (Human) OX=9606 GN=GEMIN4 PE=1 SV=2;tr|I3L2C7|I3L2C7_HUMAN Isoform of P57678, Gem-associated protein 4 OS=Homo sapiens (Human) OX=9606 GN=GEMIN4 PE=1 SV=1	1253800	584060	1308100	737620	1277100	796020	1184500	630580	1290600	784810	1265400	779870	4	20.2801	19.2396	20.3592	19.5082	20.192	19.5328	-0.850233	4.78781	3.71853	19.852	-9.73592	3.30695				keep	17		down	22.3	17	17	22.3	22.3	120.04	0	53.542	1045200000	20	1058	20	20
H7C0J3;H7C3H7	H7C0J3;H7C3H7		CHD3	tr|H7C0J3|H7C0J3_HUMAN Isoform of Q12873, CHDCT2 domain-containing protein (Fragment) OS=Homo sapiens (Human) OX=9606 GN=CHD3 PE=1 SV=1;tr|H7C3H7|H7C3H7_HUMAN Isoform of Q12873, CHDCT2 domain-containing protein (Fragment) OS=Homo sapiens (Human) OX=9606 GN	25412	12980	24891	13496	24637	14624	24012	13830	24666	14431	24361	14356	2	14.6554	13.7479	14.6435	13.736	14.4961	13.7664	-0.848233	6.17263	4.59517	14.1742	-15.1959	6.74501				keep	3		down	11.7	6	3	20.1	11.7	41.828	0	4.6751	15979000	3	383	2	2
Q9BRK4;B1AL11;B1AL12;B1AL13	Q9BRK4	Leucine zipper putative tumor suppressor 2	LZTS2	sp|Q9BRK4|LZTS2_HUMAN Leucine zipper putative tumor suppressor 2 OS=Homo sapiens (Human) OX=9606 GN=LZTS2 PE=1 SV=2	314140	167370	308840	161790	324540	191610	296860	177410	306350	174230	320240	188130	4	18.2833	17.4366	18.2767	17.3195	18.2156	17.4782	-0.8471	6.16368	4.59007	17.835	-15.1514	6.72239				keep	11		down	21.7	11	11	21.7	21.7	72.759	0	24.228	207540000	10	669	9	9
Q6UX65	Q6UX65	DNA damage-regulated autophagy modulator protein 2	DRAM2	sp|Q6UX65|DRAM2_HUMAN DNA damage-regulated autophagy modulator protein 2 OS=Homo sapiens (Human) OX=9606 GN=DRAM2 PE=1 SV=1	98391	40761	91086	50256	81767	59275	92924	44631	89856	53420	81386	57756	1	16.6085	15.3988	16.5151	15.6327	16.2268	15.7855	-0.844467	3.72463	2.94103	16.0279	-6.78914	0.619217				keep	2		down	13.5	2	2	13.5	13.5	29.766	0	17.59	103770000	2	266	2	2
Q14031;F5H3Q5;A0A087WZY5;F5H851;A8MXH5;Q14031-2	Q14031;F5H3Q5;A0A087WZY5;F5H851;A8MXH5;Q14031-2	Collagen alpha-6(IV) chain	COL4A6	sp|Q14031|CO4A6_HUMAN Collagen alpha-6(IV) chain OS=Homo sapiens (Human) OX=9606 GN=COL4A6 PE=1 SV=3;tr|F5H3Q5|F5H3Q5_HUMAN Isoform of Q14031, Collagen IV NC1 domain-containing protein OS=Homo sapiens (Human) OX=9606 GN=COL4A6 PE=1 SV=1;tr|A0A087WZY5|A0A08	62368	29889	61518	31676	51496	34645	58922	32110	60798	33827	51175	33845	6	15.9508	14.9512	15.9489	14.9668	15.5597	15.0107	-0.843567	4.23284	3.31274	15.398	-8.08963	1.90543				keep	2		down	1.5	2	2	1.5	1.5	163.8	0.00059312	2.5383	33688000	2	1691	2	2
Q15125;C9J719;C9JJ78;A0A494C0F3	Q15125;C9J719;C9JJ78;A0A494C0F3	3-beta-hydroxysteroid-Delta(8),Delta(7)-isomerase	EBP	sp|Q15125|EBP_HUMAN 3-beta-hydroxysteroid-Delta(8),Delta(7)-isomerase OS=Homo sapiens (Human) OX=9606 GN=EBP PE=1 SV=3;tr|C9J719|C9J719_HUMAN Isoform of Q15125, EXPERA domain-containing protein (Fragment) OS=Homo sapiens (Human) OX=9606 GN=EBP PE=1 SV=8;tr	186070	73309	209760	86509	90485	92572	175710	81274	205170	92713	92073	89316	4	17.5277	16.2456	17.7185	16.4163	16.373	16.4286	-0.8429	1.53749	1.27709	16.7849	-2.69419	-4.81156				keep	3			16.5	3	2	16.5	9.6	26.352	0.0057066	1.6995	51287000	2	230	2	2
Q6WCQ1;Q6WCQ1-3;Q6WCQ1-2;J3KSW8	Q6WCQ1;Q6WCQ1-3;Q6WCQ1-2;J3KSW8	Myosin phosphatase Rho-interacting protein	MPRIP	sp|Q6WCQ1|MPRIP_HUMAN Myosin phosphatase Rho-interacting protein OS=Homo sapiens (Human) OX=9606 GN=MPRIP PE=1 SV=3;sp|Q6WCQ1-3|MPRIP-3_HUMAN Isoform of Q6WCQ1, Isoform 3 of Myosin phosphatase Rho-interacting protein OS=Homo sapiens (Human) OX=9606 GN=MPRI	2165300	1143500	2135000	1173200	2176100	1248900	2046100	1213400	2117800	1254300	2149700	1227600	4	21.0684	20.2089	21.066	20.1777	20.9609	20.1826	-0.842033	6.56703	4.82974	20.6108	-17.2121	7.70101				keep	23		down	29.2	23	1	29.2	1.1	116.53	0	69.313	1653700000	26	1025	24	23
O15484;E7EV01;A0A3B3IRX8;E9PS73	O15484;E7EV01;A0A3B3IRX8	Calpain-5	CAPN5	sp|O15484|CAN5_HUMAN Calpain-5 OS=Homo sapiens (Human) OX=9606 GN=CAPN5 PE=1 SV=2;tr|E7EV01|E7EV01_HUMAN Isoform of O15484, Calpain catalytic domain-containing protein OS=Homo sapiens (Human) OX=9606 GN=CAPN5 PE=1 SV=2;tr|A0A3B3IRX8|A0A3B3IRX8_HUMAN Isofor	136260	80338	142360	74651	151190	81516	128800	84263	141410	80308	148930	80347	4	17.0782	16.3777	17.1593	16.2036	17.1136	16.2452	-0.841533	5.9914	4.50169	16.6963	-14.3519	6.30384				keep	8		down	14.8	8	8	14.8	14.8	73.168	0	14.304	93815000	8	640	7	7
P36956;P36956-3;P36956-2;P36956-4;P36956-6;P36956-5;S4R3B4;F6V242	P36956;P36956-3;P36956-2;P36956-4;P36956-6;P36956-5	Sterol regulatory element-binding protein 1;Processed sterol regulatory element-binding protein 1	SREBF1	sp|P36956|SRBP1_HUMAN Sterol regulatory element-binding protein 1 OS=Homo sapiens (Human) OX=9606 GN=SREBF1 PE=1 SV=2;sp|P36956-3|SRBP1-3_HUMAN Isoform of P36956, Isoform SREBP-1C of Sterol regulatory element-binding protein 1 OS=Homo sapiens (Human) OX=96	93357	46304	86155	49156	89121	52601	88206	49462	85503	52366	88125	51646	8	16.5327	15.5827	16.4348	15.6008	16.3511	15.6132	-0.840633	6.10958	4.55909	16.0192	-14.8956	6.59106				keep	3		down	7.5	3	3	7.5	7.5	121.67	0	9.1359	37080000	3	1147	3	3
Q6NSJ0	Q6NSJ0	Uncharacterized family 31 glucosidase KIAA1161	KIAA1161	sp|Q6NSJ0|MYORG_HUMAN Myogenesis-regulating glycosidase OS=Homo sapiens (Human) OX=9606 GN=MYORG PE=1 SV=2	173810	92247	188880	105430	198270	113810	164250	98017	186830	112670	195800	111880	1	17.4294	16.5771	17.5673	16.7017	17.5047	16.7266	-0.832	5.85699	4.4034	17.0845	-13.7466	5.97051				keep	3		down	5.3	3	3	5.3	5.3	81.086	0	8.0994	54399000	3	714	2	2
P39060;P39060-2;P39060-1;H7BXV5;H7C457	P39060;P39060-2;P39060-1;H7BXV5	Collagen alpha-1(XVIII) chain;Endostatin	COL18A1	sp|P39060|COIA1_HUMAN Collagen alpha-1(XVIII) chain OS=Homo sapiens (Human) OX=9606 GN=COL18A1 PE=1 SV=5;sp|P39060-2|COIA1-2_HUMAN Isoform of P39060, Isoform 3 of Collagen alpha-1(XVIII) chain OS=Homo sapiens (Human) OX=9606 GN=COL18A1 PE=1 SV=5;sp|P39060-	115130	62216	122900	71509	145120	78787	108800	65940	121760	76499	142960	77633	5	16.8351	16.0089	16.9473	16.1416	17.0545	16.196	-0.830133	5.22621	4.01547	16.5306	-11.2306	4.40553				keep	4		down	3.2	4	4	3.2	3.2	178.19	0	8.6761	72904000	4	1754	3	3
Q9UN70;Q9UN70-2;Q9Y5F6;Q9Y5F8;Q9Y5H4;Q9Y5G2;Q9Y5F7;Q9Y5G9;Q9Y5G0;Q9UN71;Q9Y5G3;Q9Y5G5;A0A087WUC2;Q9BR81;A0A087WYB5	Q9UN70;Q9UN70-2	Protocadherin gamma-C3	PCDHGC3	sp|Q9UN70|PCDGK_HUMAN Protocadherin gamma-C3 OS=Homo sapiens (Human) OX=9606 GN=PCDHGC3 PE=1 SV=1;sp|Q9UN70-2|PCDGK-2_HUMAN Isoform of Q9UN70, Isoform 2 of Protocadherin gamma-C3 OS=Homo sapiens (Human) OX=9606 GN=PCDHGC3 PE=1 SV=1	74856	44486	79334	42131	87209	47238	70760	46631	78799	45393	85875	46551	15	16.2141	15.525	16.3158	15.3783	16.3198	15.458	-0.829467	6.02503	4.51999	15.8685	-14.5023	6.38442				keep	3		down	4.6	3	2	4.6	3.1	101.08	0	4.9641	32315000	3	934	3	3
Q8NFT2;B5MC02;Q8NFT2-3;Q8NFT2-2;C9JHX5;C9JLP2	Q8NFT2;B5MC02;Q8NFT2-3;Q8NFT2-2;C9JHX5;C9JLP2	Metalloreductase STEAP2	STEAP2	sp|Q8NFT2|STEA2_HUMAN Metalloreductase STEAP2 OS=Homo sapiens (Human) OX=9606 GN=STEAP2 PE=1 SV=3;tr|B5MC02|B5MC02_HUMAN Isoform of Q8NFT2, Metalloreductase STEAP2 OS=Homo sapiens (Human) OX=9606 GN=STEAP2 PE=1 SV=1;sp|Q8NFT2-3|STEA2-3_HUMAN Isoform of Q8N	148820	85033	164160	92082	175090	93532	140660	89592	162700	98414	172670	92228	6	17.2054	16.4596	17.3649	16.5063	17.3253	16.4435	-0.828733	6.11238	4.55909	16.8842	-14.9095	6.59824				keep	2		down	5.9	2	2	5.9	5.9	56.055	0	5.9584	54403000	2	490	2	2
Q8N5K1;D6RCF4;A0A2R8Y540;I3L1N9	Q8N5K1;D6RCF4	CDGSH iron-sulfur domain-containing protein 2	CISD2	sp|Q8N5K1|CISD2_HUMAN CDGSH iron-sulfur domain-containing protein 2 OS=Homo sapiens (Human) OX=9606 GN=CISD2 PE=1 SV=1;tr|D6RCF4|D6RCF4_HUMAN Isoform of Q8N5K1, ZnF_CDGSH domain-containing protein OS=Homo sapiens (Human) OX=9606 GN=CISD2 PE=1 SV=1	473330	218570	419590	243930	424970	271820	447140	235490	416050	259100	421220	266040	4	18.8747	17.8216	18.7188	17.9118	18.6046	17.9827	-0.827333	5.04528	3.89764	18.319	-10.5884	3.95127				keep	5		down	39.3	5	5	39.3	39.3	15.278	0	14.748	1075100000	5	135	4	4
P58107;A0A075B730	P58107;A0A075B730	Epiplakin	EPPK1	sp|P58107|EPIPL_HUMAN Epiplakin OS=Homo sapiens (Human) OX=9606 GN=EPPK1 PE=1 SV=3;tr|A0A075B730|A0A075B730_HUMAN Isoform of P58107, Epiplakin OS=Homo sapiens (Human) OX=9606 GN=EPPK1 PE=1 SV=2	1865700	1093200	2037000	1083000	2298100	1280100	1763600	1148300	2020200	1168400	2263000	1259900	2	20.8535	20.144	20.9982	20.0623	21.0396	20.2182	-0.822267	5.51428	4.19179	20.5526	-12.3202	5.12198				keep	48		down	32.8	55	48	39.3	32.8	555.65	0	220.36	1763700000	56	5088	51	51
O75462;M0QZL6	O75462;M0QZL6	Cytokine receptor-like factor 1	CRLF1	sp|O75462|CRLF1_HUMAN Cytokine receptor-like factor 1 OS=Homo sapiens (Human) OX=9606 GN=CRLF1 PE=1 SV=1;tr|M0QZL6|M0QZL6_HUMAN Isoform of O75462, Cytokine receptor-like factor 1 (Fragment) OS=Homo sapiens (Human) OX=9606 GN=CRLF1 PE=1 SV=1	501290	261220	498970	270680	494860	305710	473680	277710	494530	289480	489650	299620	2	18.9575	18.0788	18.9688	18.0619	18.8242	18.1522	-0.8192	6.00393	4.50585	18.5072	-14.4054	6.33259				keep	6		down	17.5	6	6	17.5	17.5	46.301	0	32.369	265880000	8	422	7	7
P35221;P35221-2;G3XAM7;P35221-3;P26232-5;P26232-2;E5RIB1;P26232;P26232-3;E5RGY7;E5RG03;E5RHV7;A0A0A0MRI5;E5RJ41;E5RGY6;H0YBB8;E5RJP7;P26232-4;P26232-6;E5RGD2;E5RJL0;E5RFM5;E5RIE0;E5RFK9;E5RFM3;A0A0A0MTJ6;E5RFG3;E5RIT8;C9IZ88;E5RJZ2	P35221;P35221-2;G3XAM7;P35221-3	Catenin alpha-1	CTNNA1	sp|P35221|CTNA1_HUMAN Catenin alpha-1 OS=Homo sapiens (Human) OX=9606 GN=CTNNA1 PE=1 SV=1;sp|P35221-2|CTNA1-2_HUMAN Isoform of P35221, Isoform 2 of Catenin alpha-1 OS=Homo sapiens (Human) OX=9606 GN=CTNNA1 PE=1 SV=1;tr|G3XAM7|G3XAM7_HUMAN Isoform of P35221	6743400	3628400	6690400	3646100	6708600	3996400	6372600	3842300	6639100	3899000	6632600	3922400	30	22.7073	21.8748	22.7138	21.8136	22.5852	21.8606	-0.8191	6.23732	4.62525	22.2592	-15.5093	6.90226				keep	36		down	54.7	36	36	54.7	54.7	100.07	0	147.82	8207400000	58	906	51	51
Q8IZL8;C9JFV4;E7EV54;I3L445;I3L4P1;I3L1P4;I3L4M7	Q8IZL8;C9JFV4;E7EV54	Proline-, glutamic acid- and leucine-rich protein 1	PELP1	sp|Q8IZL8|PELP1_HUMAN Proline-, glutamic acid- and leucine-rich protein 1 OS=Homo sapiens (Human) OX=9606 GN=PELP1 PE=1 SV=2;tr|C9JFV4|C9JFV4_HUMAN Isoform of Q8IZL8, Proline-, glutamic acid- and leucine-rich protein 1 OS=Homo sapiens (Human) OX=9606 GN=PE	2118900	1057800	1939800	1128000	1981400	1198000	2002000	1128600	1926400	1198500	1961500	1175100	7	21.0371	20.0965	20.9276	20.121	20.8257	20.1226	-0.816767	5.78252	4.35556	20.5218	-13.4273	5.78853				keep	23		down	34.5	23	23	34.5	34.5	119.7	0	121.84	2962800000	49	1130	45	43
Q9HD45;Q5TB53	Q9HD45;Q5TB53	Transmembrane 9 superfamily member 3	TM9SF3	sp|Q9HD45|TM9S3_HUMAN Transmembrane 9 superfamily member 3 OS=Homo sapiens (Human) OX=9606 GN=TM9SF3 PE=1 SV=2;tr|Q5TB53|Q5TB53_HUMAN Isoform of Q9HD45, Transmembrane 9 superfamily member (Fragment) OS=Homo sapiens (Human) OX=9606 GN=TM9SF3 PE=1 SV=8	1710200	845570	1589000	951950	1675000	993830	1615900	903700	1577200	1009600	1657500	975580	2	20.728	19.7735	20.6399	19.8762	20.5833	19.853	-0.816167	6.04096	4.52724	20.2423	-14.576	6.42357				keep	11		down	19.7	11	11	19.7	19.7	67.887	0	67.917	3662400000	30	589	29	29
Q9Y4D1;Q9Y4D1-2;Q9Y4D1-3	Q9Y4D1;Q9Y4D1-2;Q9Y4D1-3	Disheveled-associated activator of morphogenesis 1	DAAM1	sp|Q9Y4D1|DAAM1_HUMAN Disheveled-associated activator of morphogenesis 1 OS=Homo sapiens (Human) OX=9606 GN=DAAM1 PE=1 SV=2;sp|Q9Y4D1-2|DAAM1-2_HUMAN Isoform of Q9Y4D1, Isoform 2 of Disheveled-associated activator of morphogenesis 1 OS=Homo sapiens (Human)	1997100	1049800	1953400	1134400	2070900	1192600	1887200	1114600	1938900	1207400	2046600	1172100	3	20.9517	20.0856	20.9377	20.1292	20.8894	20.116	-0.816	6.79317	4.95078	20.5183	-18.4712	8.23767				keep	21		down	21.7	21	19	21.7	19.6	123.47	0	47.594	660110000	24	1078	23	23
P17096;P17096-3	P17096;P17096-3	High mobility group protein HMG-I/HMG-Y	HMGA1	sp|P17096|HMGA1_HUMAN High mobility group protein HMG-I/HMG-Y OS=Homo sapiens (Human) OX=9606 GN=HMGA1 PE=1 SV=3;sp|P17096-3|HMGA1-3_HUMAN Isoform of P17096, Isoform HMG-R of High mobility group protein HMG-I/HMG-Y OS=Homo sapiens (Human) OX=9606 GN=HMGA1	1791300	990350	1884100	1053800	1989800	1131500	1692900	1046500	1868100	1126200	1964600	1112700	2	20.7948	20.0015	20.8856	20.0229	20.8318	20.0402	-0.815867	6.66756	4.88606	20.4295	-17.7597	7.93962				keep	4		down	23.4	4	3	23.4	23.4	11.676	0	16.228	22723000000	12	107	11	11
P13674;P13674-2;P13674-3	P13674;P13674-2;P13674-3	Prolyl 4-hydroxylase subunit alpha-1	P4HA1	sp|P13674|P4HA1_HUMAN Prolyl 4-hydroxylase subunit alpha-1 OS=Homo sapiens (Human) OX=9606 GN=P4HA1 PE=1 SV=2;sp|P13674-2|P4HA1-2_HUMAN Isoform of P13674, Isoform 2 of Prolyl 4-hydroxylase subunit alpha-1 OS=Homo sapiens (Human) OX=9606 GN=P4HA1 PE=1 SV=2;	4799300	2570500	4449200	2515200	4669600	2725100	4535400	2720300	4426400	2684100	4614100	2676900	3	22.2166	21.3775	22.1253	21.278	22.0625	21.3082	-0.813567	5.99568	4.50446	21.728	-14.3719	6.31458				keep	20		down	50.4	20	20	50.4	50.4	61.049	0	119.1	5223200000	27	534	25	25
O43683;O43683-2;O43683-3;A0A590UK50;A0A590UJ99;C9IYH4;C9JRC7;C9JQA4	O43683;O43683-2;O43683-3;A0A590UK50	Mitotic checkpoint serine/threonine-protein kinase BUB1	BUB1	sp|O43683|BUB1_HUMAN Mitotic checkpoint serine/threonine-protein kinase BUB1 OS=Homo sapiens (Human) OX=9606 GN=BUB1 PE=1 SV=1;sp|O43683-2|BUB1-2_HUMAN Isoform of O43683, Isoform 2 of Mitotic checkpoint serine/threonine-protein kinase BUB1 OS=Homo sapiens	2214100	1263000	2391600	1269500	2603500	1523400	2092700	1330500	2370600	1367400	2567600	1496300	8	21.1005	20.3523	21.2297	20.2915	21.2196	20.4692	-0.812267	5.62709	4.27084	20.7771	-12.7739	5.4021				keep	22		down	27.3	22	22	27.3	27.3	122.37	0	47.578	984020000	26	1085	24	24
Q15768	Q15768	Ephrin-B3	EFNB3	sp|Q15768|EFNB3_HUMAN Ephrin-B3 OS=Homo sapiens (Human) OX=9606 GN=EFNB3 PE=1 SV=1	74115	45316	74914	43843	89404	44444	70065	47316	74681	46889	87942	43972	1	16.1997	15.5516	16.2331	15.4358	16.3556	15.3701	-0.8103	5.49621	4.18111	15.8576	-12.2506	5.07807				keep	4		down	15.6	4	4	15.6	15.6	35.834	0	8.4778	49770000	4	340	4	4
Q14511;A0A087WUD2;Q14511-3	Q14511;A0A087WUD2;Q14511-3	Enhancer of filamentation 1;Enhancer of filamentation 1 p55	NEDD9	sp|Q14511|CASL_HUMAN Enhancer of filamentation 1 OS=Homo sapiens (Human) OX=9606 GN=NEDD9 PE=1 SV=1;tr|A0A087WUD2|A0A087WUD2_HUMAN Isoform of Q14511, Enhancer of filamentation 1 OS=Homo sapiens (Human) OX=9606 GN=NEDD9 PE=1 SV=1;sp|Q14511-3|CASL-3_HUMAN Is	15188	8241	16963	9049.8	18661	11469	14353	8737.9	16770	9748.1	18418	11242	3	13.9129	13.0925	14.0903	13.1594	14.0953	13.4158	-0.810267	4.4318	3.45729	13.6277	-8.64832	2.40669				keep	2		down	3.4	2	2	3.4	3.4	92.86	0	10.607	10857000	2	834	2	2
P48735;P48735-2;H0YL11	P48735;P48735-2	Isocitrate dehydrogenase [NADP], mitochondrial	IDH2	sp|P48735|IDHP_HUMAN Isocitrate dehydrogenase [NADP], mitochondrial OS=Homo sapiens (Human) OX=9606 GN=IDH2 PE=1 SV=2;sp|P48735-2|IDHP-2_HUMAN Isoform of P48735, Isoform 2 of Isocitrate dehydrogenase [NADP], mitochondrial OS=Homo sapiens (Human) OX=9606 GN	2310400	1190900	2206600	1197400	2062800	1314500	2183100	1266800	2189200	1277100	2045000	1286800	3	21.1619	20.2675	21.1136	20.2072	20.8838	20.2565	-0.809367	5.05998	3.90138	20.6484	-10.64	3.98875				keep	17		down	38.5	17	16	38.5	36.5	50.909	0	64.163	3595100000	22	452	18	18
Q29980;A0A140T979;F5H7Q8;A0A140T9M6;X6R344;A0A0G2JH58;A0A140T9H4;A0A0G2JH91;Q29980-2;A0A140T9D8;A0A0G2JHB5	Q29980;A0A140T979;F5H7Q8;A0A140T9M6;X6R344;A0A0G2JH58;A0A140T9H4;A0A0G2JH91;Q29980-2	MHC class I polypeptide-related sequence B	MICB	sp|Q29980|MICB_HUMAN MHC class I polypeptide-related sequence B OS=Homo sapiens (Human) OX=9606 GN=MICB PE=1 SV=1;tr|A0A140T979|A0A140T979_HUMAN Isoform of Q29980, Ig-like domain-containing protein (Fragment) OS=Homo sapiens (Human) OX=9606 GN=MICB PE=1 SV	325480	130400	298060	141690	165660	155200	307380	143470	293480	150510	167490	150070	11	18.3344	17.0765	18.2254	17.1281	17.2454	17.1741	-0.808833	1.82705	1.50937	17.5306	-3.1454	-4.1169				keep	4		down	18.3	4	4	18.3	18.3	42.646	0	12.912	187040000	4	383	4	4
Q9BQ52;Q9BQ52-4;G5E9D5;E7ES68;Q9BQ52-3;Q9BQ52-2;H7C2I4;V9GYS7;V9GZ72;J3QRS2;V9GYU5;J3QL08;J3QLK4	Q9BQ52;Q9BQ52-4;G5E9D5;E7ES68;Q9BQ52-3	Zinc phosphodiesterase ELAC protein 2	ELAC2	sp|Q9BQ52|RNZ2_HUMAN Zinc phosphodiesterase ELAC protein 2 OS=Homo sapiens (Human) OX=9606 GN=ELAC2 PE=1 SV=2;sp|Q9BQ52-4|RNZ2-4_HUMAN Isoform of Q9BQ52, Isoform 4 of Zinc phosphodiesterase ELAC protein 2 OS=Homo sapiens (Human) OX=9606 GN=ELAC2 PE=1 SV=2;	3372800	1878900	3503500	1962100	3899900	2240300	3187600	1983200	3476100	2102200	3847200	2202100	13	21.7077	20.9253	21.7805	20.9197	21.8026	21.0256	-0.806733	6.21538	4.61798	21.3602	-15.4022	6.84888				keep	24		down	41.5	24	24	41.5	41.5	92.218	0	125.73	2987100000	41	826	38	38
Q8NBU5;Q8NBU5-2	Q8NBU5;Q8NBU5-2	ATPase family AAA domain-containing protein 1	ATAD1	sp|Q8NBU5|ATAD1_HUMAN ATPase family AAA domain-containing protein 1 OS=Homo sapiens (Human) OX=9606 GN=ATAD1 PE=1 SV=1;sp|Q8NBU5-2|ATAD1-2_HUMAN Isoform of Q8NBU5, Isoform 2 of ATPase family AAA domain-containing protein 1 OS=Homo sapiens (Human) OX=9606 G	1531800	841130	1476100	856440	1556000	884420	1447600	887910	1468200	911220	1537600	869690	2	20.569	19.7659	20.5335	19.7237	20.477	19.6847	-0.801733	6.44129	4.767	20.1256	-16.5413	7.39705				keep	8		down	30.5	8	8	30.5	30.5	40.744	0	64.25	2054700000	10	361	10	9
O94760;B4DYP1;O94760-2	O94760;B4DYP1;O94760-2	N(G),N(G)-dimethylarginine dimethylaminohydrolase 1	DDAH1	sp|O94760|DDAH1_HUMAN N(G),N(G)-dimethylarginine dimethylaminohydrolase 1 OS=Homo sapiens (Human) OX=9606 GN=DDAH1 PE=1 SV=3;tr|B4DYP1|B4DYP1_HUMAN Isoform of O94760, N(G),N(G)-dimethylarginine dimethylaminohydrolase 1 OS=Homo sapiens (Human) OX=9606 GN=DD	1739000	991890	1920400	1135700	2386200	1286200	1643600	1045300	1904000	1215900	2348900	1267800	3	20.7521	20.0037	20.9131	20.1309	21.0939	20.225	-0.799833	4.3439	3.39368	20.5198	-8.39707	2.18476				keep	11		down	48.4	11	10	48.4	44.6	31.121	0	42.982	972050000	11	285	11	11
Q12979-2;Q12979-4;A0A1C7CYZ0;A0A0G2JQ41;Q12979;I3L2P5;B7Z683;P11274;I3L3W0;P11274-2;Q12979-3;A0A0G2JRJ1;I3NI05;A0A0G2JQT5;H0Y554;I3L1U8;A0A0G2JQB5;I3L379;I3L2C0	Q12979-2;Q12979-4;A0A1C7CYZ0;A0A0G2JQ41;Q12979;I3L2P5;B7Z683	Active breakpoint cluster region-related protein	ABR	sp|Q12979-2|ABR-2_HUMAN Isoform of Q12979, Isoform Short of Active breakpoint cluster region-related protein OS=Homo sapiens (Human) OX=9606 GN=ABR PE=1 SV=2;sp|Q12979-4|ABR-4_HUMAN Isoform of Q12979, Isoform 4 of Active breakpoint cluster region-related p	200700	124190	229220	119850	228950	129240	189740	129790	227370	128760	225960	127130	19	17.6369	17.0061	17.8465	16.8866	17.7123	16.9101	-0.797633	5.44129	4.14388	17.3331	-12.0354	4.94085				keep	5		down	7.4	5	4	7.4	4.9	93.706	0	11.249	87136000	5	822	5	5
P45985;P45985-2	P45985;P45985-2	Dual specificity mitogen-activated protein kinase kinase 4	MAP2K4	sp|P45985|MP2K4_HUMAN Dual specificity mitogen-activated protein kinase kinase 4 OS=Homo sapiens (Human) OX=9606 GN=MAP2K4 PE=1 SV=1;sp|P45985-2|MP2K4-2_HUMAN Isoform of P45985, Isoform 2 of Dual specificity mitogen-activated protein kinase kinase 4 OS=Hom	492620	279930	547320	320810	676010	371880	465600	295170	542420	343730	665620	366220	2	18.9323	18.1786	19.1022	18.3071	19.2743	18.4348	-0.7961	4.2161	3.30005	18.7049	-8.04243	1.86176				keep	7		down	24.1	7	7	24.1	24.1	44.287	0	19.342	193730000	7	399	7	7
O43490;O43490-2;O43490-5;O43490-3;O43490-4;O43490-6;O43490-7	O43490;O43490-2;O43490-5;O43490-3;O43490-4;O43490-6;O43490-7	Prominin-1	PROM1	sp|O43490|PROM1_HUMAN Prominin-1 OS=Homo sapiens (Human) OX=9606 GN=PROM1 PE=1 SV=1;sp|O43490-2|PROM1-2_HUMAN Isoform of O43490, Isoform 2 of Prominin-1 OS=Homo sapiens (Human) OX=9606 GN=PROM1 PE=1 SV=1;sp|O43490-5|PROM1-5_HUMAN Isoform of O43490, Isoform	1129900	619380	1102400	627170	1169400	691250	1067800	654260	1095700	669160	1155600	678650	7	20.13	19.3244	20.1124	19.2742	20.0649	19.3292	-0.793167	6.63264	4.85699	19.7059	-17.5632	7.85497				keep	16		down	26.4	16	16	26.4	26.4	97.201	0	71.209	962010000	14	865	14	14
O75096	O75096	Low-density lipoprotein receptor-related protein 4	LRP4	sp|O75096|LRP4_HUMAN Low-density lipoprotein receptor-related protein 4 OS=Homo sapiens (Human) OX=9606 GN=LRP4 PE=1 SV=4	848620	473850	893380	480570	888690	546940	802040	500140	885750	514520	879060	536110	1	19.717	18.938	19.8091	18.8901	19.6689	18.9914	-0.791833	6	4.50446	19.3358	-14.378	6.31789				keep	27		down	19.8	27	27	19.8	19.8	212.04	0	94.893	472170000	24	1905	23	23
P34896;P34896-2;P34896-3;P34896-4;J3KRZ5;J3KRK5;A0A087WTD8	P34896;P34896-2;P34896-3;P34896-4	Serine hydroxymethyltransferase, cytosolic	SHMT1	sp|P34896|GLYC_HUMAN Serine hydroxymethyltransferase, cytosolic OS=Homo sapiens (Human) OX=9606 GN=SHMT1 PE=1 SV=1;sp|P34896-2|GLYC-2_HUMAN Isoform of P34896, Isoform 2 of Serine hydroxymethyltransferase, cytosolic OS=Homo sapiens (Human) OX=9606 GN=SHMT1	699450	417830	767420	438440	936990	512760	661180	438000	761950	470900	922270	505070	7	19.4381	18.7564	19.5898	18.7577	19.7453	18.8983	-0.786933	4.67162	3.63182	19.1976	-9.36812	3.01293				keep	12		down	34.2	13	12	37.1	34.2	53.082	0	51.476	824640000	13	483	11	11
Q9BRA2;I3L0K2;I3L3M7;I3L2R6	Q9BRA2;I3L0K2;I3L3M7;I3L2R6	Thioredoxin domain-containing protein 17	TXNDC17	sp|Q9BRA2|TXD17_HUMAN Thioredoxin domain-containing protein 17 OS=Homo sapiens (Human) OX=9606 GN=TXNDC17 PE=1 SV=1;tr|I3L0K2|I3L0K2_HUMAN Isoform of Q9BRA2, DUF953 domain-containing protein OS=Homo sapiens (Human) OX=9606 GN=TXNDC17 PE=1 SV=1;tr|I3L3M7|I3	470950	260340	461720	268620	523500	304290	445090	274750	459070	286800	516730	298950	4	18.8674	18.0739	18.8568	18.0509	18.9054	18.1455	-0.786433	6.46852	4.77728	18.4833	-16.6837	7.46271				keep	5		down	51.2	5	5	51.2	51.2	13.941	0	24.845	1816500000	9	123	8	8
P36894;O00238;O00238-2	P36894	Bone morphogenetic protein receptor type-1A	BMPR1A	sp|P36894|BMR1A_HUMAN Bone morphogenetic protein receptor type-1A OS=Homo sapiens (Human) OX=9606 GN=BMPR1A PE=1 SV=2	801900	419560	801530	452350	826510	523450	757750	445850	794680	482490	818210	512510	3	19.6353	18.7624	19.6526	18.8028	19.5643	18.9281	-0.7863	5.80134	4.36351	19.2242	-13.5029	5.83202				keep	8		down	20.7	8	8	20.7	20.7	60.197	0	66.138	595020000	9	532	9	9
P17301	P17301	Integrin alpha-2	ITGA2	sp|P17301|ITA2_HUMAN Integrin alpha-2 OS=Homo sapiens (Human) OX=9606 GN=ITGA2 PE=1 SV=1	1142900	625470	1094200	628380	1179500	702180	1080200	660600	1088300	670260	1165700	689190	1	20.1465	19.3385	20.1016	19.277	20.0773	19.3518	-0.786033	6.50031	4.7986	19.7154	-16.8532	7.54005				keep	16		down	17.7	16	2	17.7	2	129.29	0	68.225	1266100000	16	1181	16	16
Q9H336;B7Z8V9;Q9H336-2;E5RJS4	Q9H336;B7Z8V9;Q9H336-2	Cysteine-rich secretory protein LCCL domain-containing 1	CRISPLD1	sp|Q9H336|CRLD1_HUMAN Cysteine-rich secretory protein LCCL domain-containing 1 OS=Homo sapiens (Human) OX=9606 GN=CRISPLD1 PE=2 SV=1;tr|B7Z8V9|B7Z8V9_HUMAN Isoform of Q9H336, Cysteine-rich secretory protein LCCL domain-containing 1 OS=Homo sapiens (Human)	375330	207280	398000	230590	429340	251240	354720	219100	394630	245710	424240	246760	4	18.54	17.7451	18.6426	17.8307	18.6193	17.8691	-0.785667	6.04144	4.52724	18.2078	-14.5776	6.42444				keep	6		down	16	6	6	16	16	56.888	0	17.738	116130000	6	500	6	6
Q9H3K2	Q9H3K2	Growth hormone-inducible transmembrane protein	GHITM	sp|Q9H3K2|GHITM_HUMAN Growth hormone-inducible transmembrane protein OS=Homo sapiens (Human) OX=9606 GN=GHITM PE=1 SV=2	964200	566600	934990	536700	1018200	565600	911410	593750	931970	572710	1004800	556750	1	19.9012	19.1959	19.8748	19.0495	19.8652	19.0398	-0.785333	5.9393	4.45717	19.4877	-14.1144	6.17482				keep	7		down	22	7	7	22	22	37.205	0	24.826	1455500000	26	345	21	21
O75477;B0QZ43	O75477;B0QZ43	Erlin-1	ERLIN1	sp|O75477|ERLN1_HUMAN Erlin-1 OS=Homo sapiens (Human) OX=9606 GN=ERLIN1 PE=1 SV=2;tr|B0QZ43|B0QZ43_HUMAN Isoform of O75477, PHB domain-containing protein (Fragment) OS=Homo sapiens (Human) OX=9606 GN=ERLIN1 PE=1 SV=1	3557500	2004400	3524400	2051900	3824200	2197100	3362300	2110800	3505300	2185600	3777400	2159600	2	21.7847	21.0186	21.7891	20.9842	21.7743	20.9975	-0.7826	6.84466	4.98716	21.3914	-18.7815	8.3636				keep	14		down	48	14	12	48	41.1	39.171	0	45.995	2803900000	27	348	23	21
Q6SZW1;Q6SZW1-2;J3KSG7;J3KRZ6;J3QRE0	Q6SZW1;Q6SZW1-2	Sterile alpha and TIR motif-containing protein 1	SARM1	sp|Q6SZW1|SARM1_HUMAN NAD(+) hydrolase SARM1 OS=Homo sapiens (Human) OX=9606 GN=SARM1 PE=1 SV=1;sp|Q6SZW1-2|SARM1-2_HUMAN Isoform of Q6SZW1, Isoform 2 of NAD(+) hydrolase SARM1 OS=Homo sapiens (Human) OX=9606 GN=SARM1 PE=1 SV=1	134180	81348	131190	76344	157820	84315	126840	84969	130890	81746	155380	83140	5	17.056	16.3957	17.0415	16.236	17.1755	16.2939	-0.782467	5.6073	4.25806	16.6998	-12.6956	5.35449				keep	7		down	12.8	7	7	12.8	12.8	79.387	0	14.429	62431000	8	724	7	7
P30405;R4GN99;P30405-2;H0Y548	P30405;R4GN99;P30405-2;H0Y548	Peptidyl-prolyl cis-trans isomerase F, mitochondrial;Peptidyl-prolyl cis-trans isomerase	PPIF	sp|P30405|PPIF_HUMAN Peptidyl-prolyl cis-trans isomerase F, mitochondrial OS=Homo sapiens (Human) OX=9606 GN=PPIF PE=1 SV=1;tr|R4GN99|R4GN99_HUMAN Isoform of P30405, Peptidyl-prolyl cis-trans isomerase OS=Homo sapiens (Human) OX=9606 GN=PPIF PE=1 SV=1;sp|P	654990	647530	607700	288720	726670	292810	620360	648050	622220	317000	710100	292970	4	19.3433	19.3885	19.2532	18.155	19.3785	18.09	-0.7805	1.40854	1.17131	18.9348	-2.497	-5.1157				keep	7			49.3	7	7	49.3	49.3	22.04	0	125.4	871570000	4	207	3	3
P07996;P07996-2	P07996;P07996-2	Thrombospondin-1	THBS1	sp|P07996|TSP1_HUMAN Thrombospondin-1 OS=Homo sapiens (Human) OX=9606 GN=THBS1 PE=1 SV=2;sp|P07996-2|TSP1-2_HUMAN Isoform of P07996, Isoform 2 of Thrombospondin-1 OS=Homo sapiens (Human) OX=9606 GN=THBS1 PE=1 SV=2	798650	396970	785760	557820	894820	480310	754590	424440	779990	583280	885870	473510	2	19.6294	18.6826	19.6239	19.1052	19.6788	18.804	-0.7801	4.08831	3.20902	19.254	-7.7007	1.53917				keep	17		down	18.1	17	14	18.1	15.5	129.38	0	65.814	539900000	16	1170	16	16
Q9NQS3;H7C4L0;Q9NQS3-2;C9J795;C9JMW3	Q9NQS3	Nectin-3	PVRL3	sp|Q9NQS3|NECT3_HUMAN Nectin-3 OS=Homo sapiens (Human) OX=9606 GN=NECTIN3 PE=1 SV=1	269690	149680	262720	136720	250890	165120	254880	157880	261050	146680	248530	161440	5	18.0632	17.2754	18.0433	17.0766	17.8443	17.2635	-0.778433	4.76447	3.70391	17.5944	-9.65999	3.24707				keep	6		down	14.2	6	4	14.2	8	61.002	0	27.031	265600000	7	549	7	7
P05186;P05186-3;P05186-2;B1ANL0	P05186;P05186-3;P05186-2	Alkaline phosphatase, tissue-nonspecific isozyme	ALPL	sp|P05186|PPBT_HUMAN Alkaline phosphatase, tissue-nonspecific isozyme OS=Homo sapiens (Human) OX=9606 GN=ALPL PE=1 SV=4;sp|P05186-3|PPBT-3_HUMAN Isoform of P05186, Isoform 3 of Alkaline phosphatase, tissue-nonspecific isozyme OS=Homo sapiens (Human) OX=960	1555600	936070	1511200	822120	1570700	912700	1470500	978420	1506800	880820	1551000	896710	4	20.5913	19.9201	20.5674	19.6647	20.4905	19.7301	-0.7781	5.07417	3.91367	20.1607	-10.6887	4.02392				keep	15		down	34	15	15	34	34	57.304	0	46.546	1867900000	27	524	26	26
P09486;F5GY03;E5RK62;F5H4E2	P09486;F5GY03	SPARC	SPARC	sp|P09486|SPRC_HUMAN SPARC OS=Homo sapiens (Human) OX=9606 GN=SPARC PE=1 SV=1;tr|F5GY03|F5GY03_HUMAN Isoform of P09486, Kazal-like domain-containing protein (Fragment) OS=Homo sapiens (Human) OX=9606 GN=SPARC PE=1 SV=1	210580	132620	228260	117640	234070	137660	199100	138200	226950	126780	231000	135180	4	17.7062	17.1008	17.8405	16.8597	17.7442	17.0011	-0.776433	5.1152	3.93894	17.3754	-10.8318	4.12646				keep	6		down	34	6	6	34	34	34.632	0	17.857	80457000	6	303	6	6
Q14644;Q14644-2	Q14644;Q14644-2	Ras GTPase-activating protein 3	RASA3	sp|Q14644|RASA3_HUMAN Ras GTPase-activating protein 3 OS=Homo sapiens (Human) OX=9606 GN=RASA3 PE=1 SV=3;sp|Q14644-2|RASA3-2_HUMAN Isoform of Q14644, Isoform 2 of Ras GTPase-activating protein 3 OS=Homo sapiens (Human) OX=9606 GN=RASA3 PE=1 SV=3	199310	108250	196230	115320	198740	119330	188360	114480	194970	122340	196770	117080	2	17.6269	16.8079	17.6224	16.831	17.5081	16.795	-0.7745	6.20901	4.61618	17.1986	-15.3719	6.83374				keep	8		down	15	8	8	15	15	95.698	0	26.582	70252000	8	834	8	8
Q02978	Q02978	Mitochondrial 2-oxoglutarate/malate carrier protein	SLC25A11	sp|Q02978|M2OM_HUMAN Mitochondrial 2-oxoglutarate/malate carrier protein OS=Homo sapiens (Human) OX=9606 GN=SLC25A11 PE=1 SV=3	1829100	1034600	1771900	1048500	1990000	1148900	1728800	1088800	1764300	1116800	1965100	1129100	1	20.8249	20.0645	20.797	20.0156	20.8319	20.0622	-0.7705	6.67985	4.89279	20.4327	-17.8242	7.96719				keep	11		down	46.8	11	1	46.8	7	34.061	0	45.208	2338400000	20	314	17	17
Q8IYK4;A0A3B3IT37;Q5SXQ3;Q5SXQ5	Q8IYK4;A0A3B3IT37	Procollagen galactosyltransferase 2	COLGALT2	sp|Q8IYK4|GT252_HUMAN Procollagen galactosyltransferase 2 OS=Homo sapiens (Human) OX=9606 GN=COLGALT2 PE=1 SV=1;tr|A0A3B3IT37|A0A3B3IT37_HUMAN Isoform of Q8IYK4, Procollagen galactosyltransferase 2 OS=Homo sapiens (Human) OX=9606 GN=COLGALT2 PE=1 SV=1	123250	67902	124430	76655	127250	72568	116480	71542	123640	80936	126000	71353	4	16.9335	16.135	16.9651	16.2418	16.8649	16.0774	-0.769767	5.73993	4.33442	16.5363	-13.2439	5.68203				keep	5		down	12.1	5	5	12.1	12.1	72.923	0	17.148	78671000	5	626	5	4
O15020;O15020-2;A4QPE4;E9PJZ2	O15020;O15020-2	Spectrin beta chain, non-erythrocytic 2	SPTBN2	sp|O15020|SPTN2_HUMAN Spectrin beta chain, non-erythrocytic 2 OS=Homo sapiens (Human) OX=9606 GN=SPTBN2 PE=1 SV=3;sp|O15020-2|SPTN2-2_HUMAN Isoform of O15020, Isoform 2 of Spectrin beta chain, non-erythrocytic 2 OS=Homo sapiens (Human) OX=9606 GN=SPTBN2 PE	3501900	1958000	3449200	1959800	3552500	2165500	3309700	2063800	3429500	2088500	3514900	2123400	4	21.7619	20.9848	21.758	20.918	21.668	20.9766	-0.7695	6.27003	4.64016	21.3446	-15.6714	6.98226				keep	56		down	31.3	63	56	34.8	31.3	271.32	0	238.37	2654600000	58	2390	56	56
Q9NQX7;Q9NQX7-2;C9JG41;Q9NQX7-3;B8ZZM6;E7EUS6;F5H4I5	Q9NQX7;Q9NQX7-2;C9JG41;Q9NQX7-3;B8ZZM6;E7EUS6;F5H4I5	Integral membrane protein 2C;CT-BRI3	ITM2C	sp|Q9NQX7|ITM2C_HUMAN Integral membrane protein 2C OS=Homo sapiens (Human) OX=9606 GN=ITM2C PE=1 SV=1;sp|Q9NQX7-2|ITM2C-2_HUMAN Isoform of Q9NQX7, Isoform 2 of Integral membrane protein 2C OS=Homo sapiens (Human) OX=9606 GN=ITM2C PE=1 SV=1;tr|C9JG41|C9JG41	1950400	1106800	1936900	1021900	1735600	1128600	1843400	1164800	1925000	1091400	1721900	1104000	7	20.9176	20.1618	20.9255	19.9785	20.6346	20.0365	-0.766967	4.383	3.42318	20.4424	-8.50965	2.28489				keep	10		down	48.7	10	10	48.7	48.7	30.223	0	42.308	4448500000	14	267	12	12
P17152	P17152	Transmembrane protein 11, mitochondrial	TMEM11	sp|P17152|TMM11_HUMAN Transmembrane protein 11, mitochondrial OS=Homo sapiens (Human) OX=9606 GN=TMEM11 PE=1 SV=1	513160	277340	493000	286330	503390	312820	484950	293360	490120	304270	498570	306510	1	18.9913	18.1652	18.9514	18.143	18.8489	18.1853	-0.766033	6.06956	4.53462	18.5475	-14.7079	6.49316				keep	4		down	24	4	4	24	24	21.541	0	6.9504	403120000	4	192	4	4
Q14699;G3XAJ6;C9JHG2	Q14699;G3XAJ6;C9JHG2	Raftlin	RFTN1	sp|Q14699|RFTN1_HUMAN Raftlin OS=Homo sapiens (Human) OX=9606 GN=RFTN1 PE=1 SV=4;tr|G3XAJ6|G3XAJ6_HUMAN Isoform of Q14699, Raft-linking protein, isoform CRA_c OS=Homo sapiens (Human) OX=9606 GN=RFTN1 PE=1 SV=1;tr|C9JHG2|C9JHG2_HUMAN Isoform of Q14699, Raft	39604	19744	37078	21319	34651	23640	37419	21082	36789	22595	34445	23083	3	15.2956	14.353	15.2184	14.3956	14.9882	14.4593	-0.764767	4.65561	3.62064	14.785	-9.31932	2.97315				keep	2		down	4.8	2	2	4.8	4.8	63.145	0	5.8845	16168000	2	578	2	2
Q15599;Q15599-2;Q15599-3;H3BN50;H3BQS0;H3BUQ9;H3BMF5	Q15599;Q15599-2;Q15599-3;H3BN50;H3BQS0	Na(+)/H(+) exchange regulatory cofactor NHE-RF2	SLC9A3R2	sp|Q15599|NHRF2_HUMAN Na(+)/H(+) exchange regulatory cofactor NHE-RF2 OS=Homo sapiens (Human) OX=9606 GN=SLC9A3R2 PE=1 SV=2;sp|Q15599-2|NHRF2-2_HUMAN Isoform of Q15599, Isoform 2 of Na(+)/H(+) exchange regulatory cofactor NHE-RF2 OS=Homo sapiens (Human) OX	400380	213340	394120	235280	428920	263800	378350	226150	391400	250010	424400	258580	7	18.6332	17.7867	18.6284	17.8597	18.6179	17.9394	-0.764567	6.05849	4.53018	18.2442	-14.6554	6.46556				keep	12		down	46.9	12	12	46.9	46.9	37.413	0	36.042	574360000	12	337	11	11
P13929;P13929-3;P13929-2;E5RGZ4;K7EPM1;K7EKN2	P13929;P13929-3;P13929-2;E5RGZ4;K7EPM1;K7EKN2	Beta-enolase;Enolase	ENO3	sp|P13929|ENOB_HUMAN Beta-enolase OS=Homo sapiens (Human) OX=9606 GN=ENO3 PE=1 SV=5;sp|P13929-3|ENOB-3_HUMAN Isoform of P13929, Isoform 3 of Beta-enolase OS=Homo sapiens (Human) OX=9606 GN=ENO3 PE=1 SV=5;sp|P13929-2|ENOB-2_HUMAN Isoform of P13929, Isoform	189260	104560	212240	124650	184580	111930	178870	110640	210090	131400	183500	109780	6	17.5522	16.7579	17.7355	16.9432	17.4015	16.7026	-0.761833	4.1349	3.24548	17.1822	-7.82475	1.6576				keep	3		down	8.1	6	3	20.7	8.1	46.986	0	5.2702	44034000	2	434	2	2
Q8IYR2;I3L2P4;I3L496;I3L428	Q8IYR2;I3L2P4	SET and MYND domain-containing protein 4	SMYD4	sp|Q8IYR2|SMYD4_HUMAN SET and MYND domain-containing protein 4 OS=Homo sapiens (Human) OX=9606 GN=SMYD4 PE=2 SV=3;tr|I3L2P4|I3L2P4_HUMAN Isoform of Q8IYR2, SET and MYND domain-containing protein 4 (Fragment) OS=Homo sapiens (Human) OX=9606 GN=SMYD4 PE=1 SV	41886	26172	43742	26475	53959	28132	39600	27279	43602	28256	53117	27770	4	15.3764	14.7596	15.4569	14.7081	15.6271	14.7103	-0.7608	5.17653	3.97787	15.1064	-11.0509	4.28094				keep	3		down	4.7	3	3	4.7	4.7	89.224	0	6.0121	34428000	3	804	3	3
Q96JN0-3;A0A1P0AZG4;Q96JN0-2	Q96JN0-3;A0A1P0AZG4	Ligand-dependent corepressor	LCOR	sp|Q96JN0-3|LCOR-3_HUMAN Isoform of Q96JN0, Isoform 3 of Ligand-dependent corepressor OS=Homo sapiens (Human) OX=9606 GN=LCOR PE=1 SV=2;tr|A0A1P0AZG4|A0A1P0AZG4_HUMAN Isoform of Q96JN0, Ligand-dependent corepressor OS=Homo sapiens (Human) OX=9606 GN=LCOR P	471620	267260	443760	264070	467170	275550	445750	281060	442370	280240	462190	270560	3	18.8695	18.1118	18.7996	18.0263	18.7412	18.0023	-0.756633	5.8729	4.40782	18.4251	-13.822	6.01282				keep	27		down	26.1	27	24	26.1	23.4	170.48	0	167.77	962600000	29	1557	13	13
Q8TCC3;Q8TCC3-2;B8ZZV5;Q8TCC3-3	Q8TCC3;Q8TCC3-2;B8ZZV5;Q8TCC3-3	39S ribosomal protein L30, mitochondrial	MRPL30	sp|Q8TCC3|RM30_HUMAN 39S ribosomal protein L30, mitochondrial OS=Homo sapiens (Human) OX=9606 GN=MRPL30 PE=1 SV=1;sp|Q8TCC3-2|RM30-2_HUMAN Isoform of Q8TCC3, Isoform 2 of 39S ribosomal protein L30, mitochondrial OS=Homo sapiens (Human) OX=9606 GN=MRPL30 PE	1354600	669470	1195000	642020	933400	701490	1279800	714870	1187000	680630	932440	682700	4	20.3917	19.4365	20.2287	19.308	19.7397	19.3504	-0.755067	2.88541	2.32257	19.7425	-4.98639	-1.49743				keep	4		down	31.1	4	4	31.1	31.1	18.546	0	4.9526	2225100000	4	161	3	3
P26992;Q5T8H6	P26992;Q5T8H6	Ciliary neurotrophic factor receptor subunit alpha	CNTFR	sp|P26992|CNTFR_HUMAN Ciliary neurotrophic factor receptor subunit alpha OS=Homo sapiens (Human) OX=9606 GN=CNTFR PE=1 SV=2;tr|Q5T8H6|Q5T8H6_HUMAN Isoform of P26992, Ciliary neurotrophic factor receptor subunit alpha (Fragment) OS=Homo sapiens (Human) OX=9	189210	105640	186150	103530	162950	104790	178830	111370	185050	109810	161920	102540	2	17.5519	16.7727	17.5463	16.6754	17.2216	16.6075	-0.754733	4.14146	3.24936	17.0626	-7.84092	1.67292				keep	4		down	14	4	4	14	14	40.633	0	21.394	88482000	5	372	5	5
O00767	O00767	Acyl-CoA desaturase	SCD	sp|O00767|ACOD_HUMAN Acyl-CoA desaturase OS=Homo sapiens (Human) OX=9606 GN=SCD PE=1 SV=2	262860	135860	262290	158300	268930	172890	248380	144590	260120	167560	266740	169190	1	18.0262	17.1357	18.041	17.288	17.9445	17.3299	-0.7527	5.40121	4.11634	17.6276	-11.8829	4.84214				keep	5		down	23.7	5	5	23.7	23.7	41.522	0	41.254	1317100000	5	359	4	4
Q53EZ4;Q53EZ4-2;H0Y432	Q53EZ4;Q53EZ4-2;H0Y432	Centrosomal protein of 55 kDa	CEP55	sp|Q53EZ4|CEP55_HUMAN Centrosomal protein of 55 kDa OS=Homo sapiens (Human) OX=9606 GN=CEP55 PE=1 SV=3;sp|Q53EZ4-2|CEP55-2_HUMAN Isoform of Q53EZ4, Isoform 2 of Centrosomal protein of 55 kDa OS=Homo sapiens (Human) OX=9606 GN=CEP55 PE=1 SV=3;tr|H0Y432|H0Y4	564390	306150	559220	331530	600870	375020	533370	323870	555530	352340	594770	367390	3	19.1286	18.3078	19.1332	18.3545	19.1043	18.447	-0.752267	6.07417	4.53462	18.7459	-14.7284	6.50388				keep	14		down	39.7	14	14	39.7	39.7	54.178	0	42.897	588580000	16	464	14	14
Q8IYB8;B1AR60	Q8IYB8	ATP-dependent RNA helicase SUPV3L1, mitochondrial	SUPV3L1	sp|Q8IYB8|SUV3_HUMAN ATP-dependent RNA helicase SUPV3L1, mitochondrial OS=Homo sapiens (Human) OX=9606 GN=SUPV3L1 PE=1 SV=1	3267400	1830700	3216700	1836900	3213700	2023500	3088000	1929200	3198800	1953800	3184100	1981700	2	21.6619	20.8878	21.6573	20.8246	21.5234	20.8788	-0.750467	5.85699	4.4034	21.239	-13.7426	5.96824				keep	21		down	29	21	21	29	29	87.99	0	64.235	2132000000	31	786	29	29
P46734;P46734-2;P46734-3;J3KRV4;E9PRZ0;J3QR49;K7ELM6	P46734;P46734-2;P46734-3	Dual specificity mitogen-activated protein kinase kinase 3	MAP2K3	sp|P46734|MP2K3_HUMAN Dual specificity mitogen-activated protein kinase kinase 3 OS=Homo sapiens (Human) OX=9606 GN=MAP2K3 PE=1 SV=2;sp|P46734-2|MP2K3-2_HUMAN Isoform of P46734, Isoform 1 of Dual specificity mitogen-activated protein kinase kinase 3 OS=Hom	275420	174770	299040	178900	373900	198610	260400	181990	297790	191340	368000	195890	7	18.0935	17.499	18.2301	17.4645	18.4199	17.5299	-0.750033	4.61798	3.5936	17.8728	-9.20029	2.87533				keep	6		down	24.8	7	6	27.4	24.8	39.318	0	23.029	198510000	7	347	7	7
Q5TCZ1;H0Y507;Q5TCZ1-2;Q5TCZ1-3	Q5TCZ1;H0Y507;Q5TCZ1-2;Q5TCZ1-3	SH3 and PX domain-containing protein 2A	SH3PXD2A	sp|Q5TCZ1|SPD2A_HUMAN SH3 and PX domain-containing protein 2A OS=Homo sapiens (Human) OX=9606 GN=SH3PXD2A PE=1 SV=1;tr|H0Y507|H0Y507_HUMAN Isoform of Q5TCZ1, SH3 and PX domain-containing protein 2A (Fragment) OS=Homo sapiens (Human) OX=9606 GN=SH3PXD2A PE=	39544	22639	42747	24280	46557	28875	37376	23838	42400	25946	46024	28295	4	15.2934	14.5504	15.4237	14.5832	15.4143	14.7479	-0.749967	5.17653	3.97787	15.0022	-11.0501	4.28038				keep	2		down	1.9	3	2	2.7	1.9	125.29	0.0016213	2.2419	11941000	2	1133	2	2
Q5T4K2;Q5T4K4;Q5T4K3;Q9NY26-2;Q9NY26	Q5T4K2;Q5T4K4;Q5T4K3;Q9NY26-2;Q9NY26	Zinc transporter ZIP1	SLC39A1	tr|Q5T4K2|Q5T4K2_HUMAN Isoform of Q9NY26, Zinc transporter ZIP1 (Fragment) OS=Homo sapiens (Human) OX=9606 GN=SLC39A1 PE=1 SV=1;tr|Q5T4K4|Q5T4K4_HUMAN Isoform of Q9NY26, Zinc transporter ZIP1 (Fragment) OS=Homo sapiens (Human) OX=9606 GN=SLC39A1 PE=1 SV=1;	66379	34894	68427	40825	53066	34184	62725	37081	67819	42792	53007	33448	5	16.0407	15.1746	16.1024	15.3329	15.6031	14.9914	-0.7491	3.03885	2.43577	15.5408	-5.2888	-1.1118				keep	2		down	21.8	2	2	21.8	21.8	21.844	0	5.1319	230220000	2	206	2	2
P62258;P62258-2;B4DJF2;I3L3T1;K7EM20;K7EIT4;I3L0W5	P62258;P62258-2	14-3-3 protein epsilon	YWHAE	sp|P62258|1433E_HUMAN 14-3-3 protein epsilon OS=Homo sapiens (Human) OX=9606 GN=YWHAE PE=1 SV=1;sp|P62258-2|1433E-2_HUMAN Isoform of P62258, Isoform SV of 14-3-3 protein epsilon OS=Homo sapiens (Human) OX=9606 GN=YWHAE PE=1 SV=1	6417500	3907900	6953100	3993200	8164200	4718800	6066800	4086900	6911400	4277500	8050200	4637100	7	22.6358	21.9818	22.7694	21.9448	22.8685	22.1003	-0.748933	4.96257	3.84052	22.3834	-10.3123	3.74805				keep	21		down	72.5	21	18	72.5	65.5	29.174	0	135	36458000000	102	255	91	90
Q3KR37;E9PRD6;A0A024R3M2;J3KNL5;A0A1B0GWG7;A0A1B0GUD6;Q3KR37-2;Q3KR37-4;A0A2R8Y5X2;A0A0J9YY71;A0A0J9YXF6;A0A0J9YXZ1;Q3KR37-3	Q3KR37;E9PRD6;A0A024R3M2;J3KNL5;A0A1B0GWG7;A0A1B0GUD6;Q3KR37-2;Q3KR37-4;A0A2R8Y5X2	GRAM domain-containing protein 1B	GRAMD1B;hCG_39893	sp|Q3KR37|ASTRB_HUMAN Protein Aster-B OS=Homo sapiens (Human) OX=9606 GN=GRAMD1B PE=1 SV=1;tr|E9PRD6|E9PRD6_HUMAN Isoform of Q3KR37, VASt domain-containing protein (Fragment) OS=Homo sapiens (Human) OX=9606 GN=GRAMD1B PE=1 SV=1;tr|A0A024R3M2|A0A024R3M2_HUM	23649	13646	20458	12030	22239	13269	22353	14303	20475	12803	21985	13022	13	14.5517	13.8201	14.3605	13.5701	14.3484	13.6261	-0.7481	4.51999	3.52341	14.0462	-8.90889	2.63107				keep	2		down	3.3	3	2	4.5	3.3	85.399	0	8.2311	11055000	2	738	2	2
Q96Q89;Q96Q89-3;Q96Q89-2;Q96Q89-4;Q96Q89-5;A0A0A0MSJ5	Q96Q89;Q96Q89-3;Q96Q89-2;Q96Q89-4	Kinesin-like protein KIF20B	KIF20B	sp|Q96Q89|KI20B_HUMAN Kinesin-like protein KIF20B OS=Homo sapiens (Human) OX=9606 GN=KIF20B PE=1 SV=3;sp|Q96Q89-3|KI20B-3_HUMAN Isoform of Q96Q89, Isoform 3 of Kinesin-like protein KIF20B OS=Homo sapiens (Human) OX=9606 GN=KIF20B PE=1 SV=3;sp|Q96Q89-2|KI20	3334600	1822100	3111000	1894600	3359400	2046000	3151400	1923900	3098700	2008000	3325400	2006300	6	21.6913	20.8811	21.6091	20.8692	21.5874	20.8947	-0.7476	6.29757	4.65561	21.2555	-15.8097	7.04983				keep	46		down	30.8	46	44	30.8	29	210.63	0	197.62	1687000000	46	1820	44	44
Q49AM1;F8VSD8	Q49AM1;F8VSD8	Transcription termination factor 2, mitochondrial	MTERF2	sp|Q49AM1|MTEF2_HUMAN Transcription termination factor 2, mitochondrial OS=Homo sapiens (Human) OX=9606 GN=MTERF2 PE=1 SV=2;tr|F8VSD8|F8VSD8_HUMAN Isoform of Q49AM1, Transcription termination factor 2, mitochondrial (Fragment) OS=Homo sapiens (Human) OX=96	50945	31946	53968	31184	57010	31936	48165	33293	53749	33203	56312	31425	2	15.6589	15.0472	15.76	14.9442	15.7065	14.8933	-0.7469	5.71897	4.32514	15.335	-13.1581	5.63167				keep	3		down	8.8	3	3	8.8	8.8	44.413	0	4.7336	35572000	3	385	3	3
O43505	O43505	Beta-1,4-glucuronyltransferase 1	B4GAT1	sp|O43505|B4GA1_HUMAN Beta-1,4-glucuronyltransferase 1 OS=Homo sapiens (Human) OX=9606 GN=B4GAT1 PE=1 SV=1	283290	161160	278300	150830	283700	187480	267760	169530	276790	161560	280910	183270	1	18.1341	17.382	18.1264	17.2183	18.0216	17.4467	-0.745033	5.07935	3.91587	17.7215	-10.7065	4.03672				keep	3		down	12.5	3	3	12.5	12.5	47.119	0	20.243	252480000	4	415	4	4
O14641;I3L2N2;I3L2W9;I3L0M7;A0A3B3ITC6;I3L0Z8	O14641;I3L2N2;I3L2W9;I3L0M7	Segment polarity protein dishevelled homolog DVL-2	DVL2	sp|O14641|DVL2_HUMAN Segment polarity protein dishevelled homolog DVL-2 OS=Homo sapiens (Human) OX=9606 GN=DVL2 PE=1 SV=1;tr|I3L2N2|I3L2N2_HUMAN Isoform of O14641, Segment polarity protein dishevelled homolog DVL-2 OS=Homo sapiens (Human) OX=9606 GN=DVL2 P	281000	168450	289690	164260	315320	189180	265630	176320	288280	175210	311520	185620	6	18.1224	17.4459	18.1843	17.3413	18.174	17.4598	-0.744567	6.03763	4.52578	17.788	-14.5597	6.41493				keep	10		down	17	10	6	17	10.3	78.947	0	43.488	319600000	14	736	13	13
Q9BQ39;A0A087WVC1;S4R3V4;S4R3G6	Q9BQ39;A0A087WVC1	ATP-dependent RNA helicase DDX50	DDX50	sp|Q9BQ39|DDX50_HUMAN ATP-dependent RNA helicase DDX50 OS=Homo sapiens (Human) OX=9606 GN=DDX50 PE=1 SV=1;tr|A0A087WVC1|A0A087WVC1_HUMAN Isoform of Q9BQ39, ATP-dependent RNA helicase DDX50 OS=Homo sapiens (Human) OX=9606 GN=DDX50 PE=1 SV=1	1814900	1060500	1766100	1016100	1737800	1055400	1715500	1112100	1759800	1079000	1721500	1035100	4	20.8137	20.1002	20.7923	19.9703	20.6364	19.9397	-0.744067	5.14327	3.95546	20.3754	-10.9323	4.19769				keep	21		down	37.6	23	21	41.2	37.6	82.564	0	110.09	2603700000	22	737	19	19
Q96D70;K7EIG9;K7EN78;K7ER32	Q96D70;K7EIG9;K7EN78	R3H domain-containing protein 4	R3HDM4	sp|Q96D70|R3HD4_HUMAN R3H domain-containing protein 4 OS=Homo sapiens (Human) OX=9606 GN=R3HDM4 PE=1 SV=3;tr|K7EIG9|K7EIG9_HUMAN Isoform of Q96D70, R3H domain-containing protein OS=Homo sapiens (Human) OX=9606 GN=R3HDM4 PE=1 SV=1;tr|K7EN78|K7EN78_HUMAN Iso	26128	17477	30142	18681	33507	16596	24707	18121	30017	19782	33045	16423	4	14.6955	14.1771	14.9197	14.205	14.9397	13.9489	-0.7413	4.22257	3.30478	14.481	-8.0602	1.87822				keep	3		down	18.3	3	3	18.3	18.3	30.349	0	6.7592	45301000	3	268	2	2
P31431;P31431-2	P31431;P31431-2	Syndecan-4	SDC4	sp|P31431|SDC4_HUMAN Syndecan-4 OS=Homo sapiens (Human) OX=9606 GN=SDC4 PE=1 SV=2;sp|P31431-2|SDC4-2_HUMAN Isoform of P31431, Isoform 2 of Syndecan-4 OS=Homo sapiens (Human) OX=9606 GN=SDC4 PE=1 SV=2	194450	95760	182620	121510	191380	120280	183710	102410	181370	127450	190080	117800	2	17.5913	16.631	17.5187	16.9064	17.4537	16.8064	-0.739967	4.73755	3.68212	17.1512	-9.57258	3.17762				keep	2		down	11.1	2	2	11.1	11.1	21.641	0	5.6701	85190000	3	198	3	3
Q8NFQ8	Q8NFQ8	Torsin-1A-interacting protein 2	TOR1AIP2	sp|Q8NFQ8|TOIP2_HUMAN Torsin-1A-interacting protein 2 OS=Homo sapiens (Human) OX=9606 GN=TOR1AIP2 PE=1 SV=1	1051700	505040	981490	574320	832900	610860	993610	541840	972890	605280	831640	594970	1	20.0265	19.0299	19.9448	19.1472	19.5754	19.1508	-0.7396	3.61777	2.86233	19.4791	-6.5377	0.348999				keep	11		down	38.9	12	11	41.1	38.9	51.263	0	61.302	788540000	13	470	13	13
Q6ZVM7;Q6ZVM7-3;Q6ZVM7-5;F5H3S6;B7Z2U2;Q6ZVM7-2;Q6ZVM7-4;K7ENB0	Q6ZVM7;Q6ZVM7-3;Q6ZVM7-5;F5H3S6;B7Z2U2;Q6ZVM7-2;Q6ZVM7-4	TOM1-like protein 2	TOM1L2	sp|Q6ZVM7|TM1L2_HUMAN TOM1-like protein 2 OS=Homo sapiens (Human) OX=9606 GN=TOM1L2 PE=1 SV=1;sp|Q6ZVM7-3|TM1L2-3_HUMAN Isoform of Q6ZVM7, Isoform 3 of TOM1-like protein 2 OS=Homo sapiens (Human) OX=9606 GN=TOM1L2 PE=1 SV=1;sp|Q6ZVM7-5|TM1L2-5_HUMAN Isofor	83118	44188	79607	49166	94969	59693	78546	46831	79152	52284	93893	58463	8	16.3651	15.5153	16.3208	15.6011	16.4428	15.7956	-0.7389	4.72125	3.66891	16.0068	-9.52094	3.13633				keep	5		down	18.9	5	4	18.9	15.2	55.556	0	23.811	83822000	4	507	4	4
Q9UQ90;A0A2U3TZH1;A0A2R8YFW4;A0A2R8YDQ1;A0A2R8Y4Y7;A0A2R8Y7B8;A0A2R8Y726;A0A2R8Y3M4;A0A2R8Y6K2;A0A2R8Y7E2;A0A2R8YGZ0;A0A2R8Y7N2;A0A2R8YFJ7;A0A2R8Y729;A0A2R8Y6E8;A0A2R8Y632;A0A2R8YFF4;A0A2R8Y4M0;A0A2R8YG79;A0A2R8Y4M8;Q9UQ90-2;A0A2R8Y617;A0A2R8YEH4;J3KRF6;A0A2R8Y6Z7;A0A2R8Y4Z7;A0A2R8Y4L0;A0A2R8YGV4;A0A2R8Y4L7;H3BMP1;A0A2R8YFN9;H3BTR8	Q9UQ90;A0A2U3TZH1;A0A2R8YFW4;A0A2R8YDQ1;A0A2R8Y4Y7;A0A2R8Y7B8;A0A2R8Y726;A0A2R8Y3M4;A0A2R8Y6K2;A0A2R8Y7E2;A0A2R8YGZ0	Paraplegin	SPG7	sp|Q9UQ90|SPG7_HUMAN Paraplegin OS=Homo sapiens (Human) OX=9606 GN=SPG7 PE=1 SV=2;tr|A0A2U3TZH1|A0A2U3TZH1_HUMAN Isoform of Q9UQ90, AAA domain-containing protein OS=Homo sapiens (Human) OX=9606 GN=SPG7 PE=1 SV=1;tr|A0A2R8YFW4|A0A2R8YFW4_HUMAN Isoform of Q9	576270	315070	564400	354110	620930	377800	544610	332940	561370	374430	614780	370490	32	19.1586	18.3492	19.1465	18.4496	19.1517	18.4576	-0.733467	6.17328	4.59517	18.7855	-15.1998	6.74695				keep	7		down	12.6	7	7	12.6	12.6	88.234	0	20.192	265940000	8	795	8	8
Q00653;Q00653-4;Q00653-3;M0QZX1	Q00653;Q00653-4;Q00653-3	Nuclear factor NF-kappa-B p100 subunit;Nuclear factor NF-kappa-B p52 subunit	NFKB2	sp|Q00653|NFKB2_HUMAN Nuclear factor NF-kappa-B p100 subunit OS=Homo sapiens (Human) OX=9606 GN=NFKB2 PE=1 SV=4;sp|Q00653-4|NFKB2-4_HUMAN Isoform of Q00653, Isoform 4 of Nuclear factor NF-kappa-B p100 subunit OS=Homo sapiens (Human) OX=9606 GN=NFKB2 PE=1 S	1865000	1098200	2014800	1111700	1945300	1249900	1762900	1152700	1999900	1185200	1928200	1223100	4	20.853	20.1506	20.9824	20.1	20.7991	20.1837	-0.7334	5.50307	4.18575	20.5115	-12.2772	5.09486				keep	24		down	38.2	24	24	38.2	38.2	96.748	0	98.426	1651400000	29	900	24	24
Q00059;H7BYN3;Q00059-2	Q00059;H7BYN3;Q00059-2	Transcription factor A, mitochondrial	TFAM	sp|Q00059|TFAM_HUMAN Transcription factor A, mitochondrial OS=Homo sapiens (Human) OX=9606 GN=TFAM PE=1 SV=1;tr|H7BYN3|H7BYN3_HUMAN Isoform of Q00059, Transcription factor A, mitochondrial (Fragment) OS=Homo sapiens (Human) OX=9606 GN=TFAM PE=1 SV=1;sp|Q00	1025500	632430	950400	539930	985770	588480	969480	658840	950770	575560	974810	577530	3	19.9901	19.3544	19.8983	19.0581	19.8185	19.097	-0.732467	4.34582	3.39439	19.5361	-8.40192	2.18909				keep	6		down	22.8	6	6	22.8	22.8	29.096	0	12.707	3689800000	10	246	10	10
P78559;E9PGC8;P78559-2	P78559;E9PGC8;P78559-2	Microtubule-associated protein 1A;MAP1A heavy chain;MAP1 light chain LC2	MAP1A	sp|P78559|MAP1A_HUMAN Microtubule-associated protein 1A OS=Homo sapiens (Human) OX=9606 GN=MAP1A PE=1 SV=6;tr|E9PGC8|E9PGC8_HUMAN Isoform of P78559, Microtubule-associated protein 1A OS=Homo sapiens (Human) OX=9606 GN=MAP1A PE=1 SV=1;sp|P78559-2|MAP1A-2_HU	466100	296500	511270	283270	592110	352210	440690	308720	508620	304540	583890	345700	3	18.8525	18.2616	19.0039	18.1275	19.0831	18.3564	-0.731333	4.5817	3.56719	18.6142	-9.09157	2.785				keep	17		down	8.5	19	17	9.2	8.5	305.48	0	38.327	244470000	16	2803	14	14
Q05682-5;E9PGZ1;Q05682-4;C9J813	Q05682-5;E9PGZ1;Q05682-4;C9J813	Caldesmon	CALD1	sp|Q05682-5|CALD1-5_HUMAN Isoform of Q05682, Isoform 5 of Caldesmon OS=Homo sapiens (Human) OX=9606 GN=CALD1 PE=1 SV=3;tr|E9PGZ1|E9PGZ1_HUMAN Isoform of Q05682, Caldesmon OS=Homo sapiens (Human) OX=9606 GN=CALD1 PE=1 SV=1;sp|Q05682-4|CALD1-4_HUMAN Isoform	32051	13336	31808	25381	34042	21573	30270	14615	31448	26204	33962	21121	4	14.9903	13.7869	14.9973	14.6472	14.9626	14.3273	-0.7296	2.27409	1.86125	14.6186	-3.87835	-3.02183				keep	2		down	1.9	26	2	49.1	1.9	61.212	0.00012697	3.7797	69699000	2	532	2	2
Q6AZY7-2;Q6AZY7	Q6AZY7-2;Q6AZY7	Scavenger receptor class A member 3	SCARA3	sp|Q6AZY7-2|SCAR3-2_HUMAN Isoform of Q6AZY7, Isoform 2 of Scavenger receptor class A member 3 OS=Homo sapiens (Human) OX=9606 GN=SCARA3 PE=2 SV=1;sp|Q6AZY7|SCAR3_HUMAN Scavenger receptor class A member 3 OS=Homo sapiens (Human) OX=9606 GN=SCARA3 PE=1 SV=1	112010	68892	117480	68252	129000	76007	105890	71932	116970	72770	127440	74632	2	16.7955	16.1559	16.8822	16.0743	16.8846	16.1442	-0.7293	6.0575	4.53018	16.4895	-14.6515	6.46347				keep	2		down	4.9	2	2	4.9	4.9	52.433	0	7.6826	42156000	2	466	2	2
P17482;P28358;P31269;D6RAR5	P17482	Homeobox protein Hox-B9	HOXB9	sp|P17482|HXB9_HUMAN Homeobox protein Hox-B9 OS=Homo sapiens (Human) OX=9606 GN=HOXB9 PE=1 SV=2	365580	200500	335310	212470	362720	219830	345500	211560	334380	224260	359320	215610	4	18.5021	17.6971	18.3953	17.7126	18.3761	17.6764	-0.729133	6.01055	4.51004	18.0599	-14.4348	6.34834				keep	5		down	28.4	6	5	32.4	28.4	28.058	0	8.9593	236160000	5	250	5	5
P48307;A0A3B3ISY1;A0A3B3IRW1;P48307-2;H7C4A3;A0A3B3IS67	P48307;A0A3B3ISY1;A0A3B3IRW1;P48307-2;H7C4A3;A0A3B3IS67	Tissue factor pathway inhibitor 2	TFPI2	sp|P48307|TFPI2_HUMAN Tissue factor pathway inhibitor 2 OS=Homo sapiens (Human) OX=9606 GN=TFPI2 PE=1 SV=1;tr|A0A3B3ISY1|A0A3B3ISY1_HUMAN Isoform of P48307, Tissue factor pathway inhibitor 2 (Fragment) OS=Homo sapiens (Human) OX=9606 GN=TFPI2 PE=1 SV=1;tr|	76498	45262	70856	42689	80216	47515	72311	47360	70804	45398	79265	46645	6	16.2454	15.5499	16.1528	15.3973	16.1992	15.4665	-0.7279	5.70333	4.31785	15.8352	-13.0876	5.59006				keep	2		down	10.6	2	2	10.6	10.6	26.934	0.0026316	2.0434	36643000	2	235	2	2
P02794;G3V1D1;G3V192;E9PQR3;E9PPQ4;E9PKM5;E9PRK8;E9PK45;E9PKY7	P02794;G3V1D1;G3V192	Ferritin heavy chain;Ferritin heavy chain, N-terminally processed;Ferritin	FTH1	sp|P02794|FRIH_HUMAN Ferritin heavy chain OS=Homo sapiens (Human) OX=9606 GN=FTH1 PE=1 SV=2;tr|G3V1D1|G3V1D1_HUMAN Isoform of P02794, Ferritin OS=Homo sapiens (Human) OX=9606 GN=FTH1 PE=1 SV=1;tr|G3V192|G3V192_HUMAN Isoform of P02794, Ferritin OS=Homo sapi	214510	119630	210470	112080	159420	113460	202730	126120	209150	118780	159160	110620	9	17.7329	16.9521	17.7234	16.7899	17.1901	16.7222	-0.7274	2.88189	2.32056	17.1851	-4.97959	-1.50626				keep	3		down	18.6	3	3	18.6	18.6	21.225	0	7.8837	137250000	3	183	3	3
P52732	P52732	Kinesin-like protein KIF11	KIF11	sp|P52732|KIF11_HUMAN Kinesin-like protein KIF11 OS=Homo sapiens (Human) OX=9606 GN=KIF11 PE=1 SV=2	4471000	2704900	4899100	2991700	5848600	3375600	4226500	2831500	4869600	3185000	5771900	3317400	1	22.1144	21.451	22.2642	21.5282	22.3872	21.6171	-0.723167	4.60555	3.58517	21.8937	-9.16603	2.84697				keep	39		down	48.5	39	39	48.5	48.5	119.16	0	147.57	6845300000	45	1056	36	36
P23677;C9JC74	P23677;C9JC74	Inositol-trisphosphate 3-kinase A	ITPKA	sp|P23677|IP3KA_HUMAN Inositol-trisphosphate 3-kinase A OS=Homo sapiens (Human) OX=9606 GN=ITPKA PE=1 SV=1;tr|C9JC74|C9JC74_HUMAN Isoform of P23677, Kinase (Fragment) OS=Homo sapiens (Human) OX=9606 GN=ITPKA PE=1 SV=1	417390	246690	460830	271960	466810	285860	394540	258930	457420	288380	462460	280250	2	18.6933	17.9962	18.854	18.0688	18.7401	18.0553	-0.722367	5.64782	4.2815	18.4013	-12.8629	5.45587				keep	9		down	25.2	9	8	25.2	23.2	51.008	0	64.045	163270000	10	461	9	9
O15344;O15344-2;C9J453;A0A087X255;A0A087X0X0;C9JZJ7	O15344;O15344-2;C9J453;A0A087X255;A0A087X0X0	E3 ubiquitin-protein ligase Midline-1	MID1	sp|O15344|TRI18_HUMAN E3 ubiquitin-protein ligase Midline-1 OS=Homo sapiens (Human) OX=9606 GN=MID1 PE=1 SV=1;sp|O15344-2|TRI18-2_HUMAN Isoform of O15344, Isoform 2 of E3 ubiquitin-protein ligase Midline-1 OS=Homo sapiens (Human) OX=9606 GN=MID1 PE=1 SV=1;	996140	617140	1100100	641780	1291000	763750	941750	644460	1093600	686240	1273900	749820	6	19.9482	19.3191	20.1094	19.3074	20.2076	19.4731	-0.721867	4.59517	3.57662	19.7275	-9.13248	2.8191				keep	11		down	22.9	11	11	22.9	22.9	75.25	0	35.623	542220000	14	667	13	13
Q15147;Q15147-2;Q15147-5;Q15147-4	Q15147;Q15147-2;Q15147-5;Q15147-4	1-phosphatidylinositol 4,5-bisphosphate phosphodiesterase beta-4	PLCB4	sp|Q15147|PLCB4_HUMAN 1-phosphatidylinositol 4,5-bisphosphate phosphodiesterase beta-4 OS=Homo sapiens (Human) OX=9606 GN=PLCB4 PE=1 SV=3;sp|Q15147-2|PLCB4-2_HUMAN Isoform of Q15147, Isoform 1 of 1-phosphatidylinositol 4,5-bisphosphate phosphodiesterase be	92667	55916	98969	52074	94663	63811	87600	58522	98319	55804	93839	62333	4	16.522	15.8549	16.6348	15.684	16.4381	15.8919	-0.721367	4.75945	3.69989	16.171	-9.6431	3.2337				keep	3		down	3.1	3	3	3.1	3.1	134.46	0	4.728	37580000	4	1175	3	3
O15054;O15054-1	O15054;O15054-1	Lysine-specific demethylase 6B	KDM6B	sp|O15054|KDM6B_HUMAN Lysine-specific demethylase 6B OS=Homo sapiens (Human) OX=9606 GN=KDM6B PE=1 SV=4;sp|O15054-1|KDM6B-1_HUMAN Isoform of O15054, Isoform 1 of Lysine-specific demethylase 6B OS=Homo sapiens (Human) OX=9606 GN=KDM6B PE=1 SV=4	66983	39626	66797	38268	69673	44276	63317	41513	66526	40770	68984	43345	2	16.0537	15.3581	16.0677	15.2396	15.9959	15.3646	-0.718333	5.80967	4.36653	15.6799	-13.5469	5.85721				keep	2		down	1.3	2	2	1.3	1.3	176.63	0	4.9369	30131000	2	1643	2	2
Q9Y2D0	Q9Y2D0	Carbonic anhydrase 5B, mitochondrial	CA5B	sp|Q9Y2D0|CAH5B_HUMAN Carbonic anhydrase 5B, mitochondrial OS=Homo sapiens (Human) OX=9606 GN=CA5B PE=1 SV=1	324590	188060	310540	188350	335500	205860	306800	197330	309690	199720	332110	201810	1	18.3305	17.6047	18.2846	17.5388	18.2635	17.5817	-0.7178	6.28316	4.64589	17.934	-15.7371	7.01444				keep	3		down	12.6	3	3	12.6	12.6	36.433	0	5.1074	107090000	3	317	3	3
P14649;F8W1I5;F8VSA2	P14649;F8W1I5	Myosin light chain 6B	MYL6B	sp|P14649|MYL6B_HUMAN Myosin light chain 6B OS=Homo sapiens (Human) OX=9606 GN=MYL6B PE=1 SV=1;tr|F8W1I5|F8W1I5_HUMAN Isoform of P14649, Myosin light chain 6B OS=Homo sapiens (Human) OX=9606 GN=MYL6B PE=1 SV=1	440360	256560	426340	274650	518240	297790	416240	269100	425330	290940	511770	292710	3	18.7706	18.0528	18.7418	18.083	18.8908	18.1143	-0.7177	5.73049	4.33442	18.4422	-13.208	5.66097				keep	5		down	26.9	7	5	38.5	26.9	22.764	0	12.248	161830000	6	208	5	5
Q9HBH1	Q9HBH1	Peptide deformylase, mitochondrial	PDF	sp|Q9HBH1|DEFM_HUMAN Peptide deformylase, mitochondrial OS=Homo sapiens (Human) OX=9606 GN=PDF PE=1 SV=1	208780	114190	194670	124200	204530	126830	197310	120560	194000	130840	202870	124280	1	17.6939	16.885	17.6108	16.938	17.5495	16.8829	-0.7161	5.81816	4.37161	17.26	-13.5793	5.87571				keep	6		down	32.5	6	6	32.5	32.5	27.013	0	32.496	262710000	6	243	6	6
O94808;E5RJP4	O94808	Glutamine--fructose-6-phosphate aminotransferase [isomerizing] 2	GFPT2	sp|O94808|GFPT2_HUMAN Glutamine--fructose-6-phosphate aminotransferase [isomerizing] 2 OS=Homo sapiens (Human) OX=9606 GN=GFPT2 PE=1 SV=3	334930	205260	345210	210600	408180	238360	316630	214330	344050	224130	402980	234130	2	18.3757	17.731	18.4373	17.6999	18.5464	17.7931	-0.7118	5.48413	4.1707	18.0972	-12.2012	5.04675				keep	9		down	16.9	13	9	25.5	16.9	76.93	0	26.276	156990000	7	682	7	7
Q9NR28;Q9NR28-2;Q9NR28-3;H7BZK7;A0A2U3TZH2;H7BZQ7	Q9NR28;Q9NR28-2;Q9NR28-3;H7BZK7;A0A2U3TZH2	Diablo homolog, mitochondrial	DIABLO	sp|Q9NR28|DBLOH_HUMAN Diablo homolog, mitochondrial OS=Homo sapiens (Human) OX=9606 GN=DIABLO PE=1 SV=1;sp|Q9NR28-2|DBLOH-2_HUMAN Isoform of Q9NR28, Isoform 2 of Diablo homolog, mitochondrial OS=Homo sapiens (Human) OX=9606 GN=DIABLO PE=1 SV=1;sp|Q9NR28-3|	1322000	686250	1217300	621880	872160	718910	1249200	728880	1208900	660880	874020	697650	6	20.3565	19.4723	20.2554	19.262	19.6418	19.3858	-0.7112	2.39497	1.95538	19.729	-4.08652	-2.72236				keep	6		down	33.9	6	6	33.9	33.9	27.131	0	74.821	3054700000	12	239	12	12
O14656;A0A494BZT7;O14656-2	O14656;A0A494BZT7	Torsin-1A	TOR1A	sp|O14656|TOR1A_HUMAN Torsin-1A OS=Homo sapiens (Human) OX=9606 GN=TOR1A PE=1 SV=1;tr|A0A494BZT7|A0A494BZT7_HUMAN Isoform of O14656, Torsin-1A OS=Homo sapiens (Human) OX=9606 GN=TOR1A PE=1 SV=1	823530	453640	799340	480280	788430	521270	778300	478870	795180	507780	783070	509550	3	19.6737	18.8751	19.6486	18.8892	19.4962	18.922	-0.710733	5.47237	4.16368	19.2508	-12.1569	5.01862				keep	9		down	32.8	9	9	32.8	32.8	37.808	0	24.695	372820000	9	332	8	8
Q96CP6;M0QZ12;Q96CP6-3;Q96CP6-2;M0R0J9;S4R3I2	Q96CP6;M0QZ12;Q96CP6-3;Q96CP6-2	GRAM domain-containing protein 1A	GRAMD1A	sp|Q96CP6|ASTRA_HUMAN Protein Aster-A OS=Homo sapiens (Human) OX=9606 GN=GRAMD1A PE=1 SV=2;tr|M0QZ12|M0QZ12_HUMAN Isoform of Q96CP6, VASt domain-containing protein OS=Homo sapiens (Human) OX=9606 GN=GRAMD1A PE=1 SV=1;sp|Q96CP6-3|ASTRA-3_HUMAN Isoform of Q9	443340	279230	480750	281350	483920	288270	419160	290990	478530	298510	479150	282930	6	18.7803	18.175	18.9151	18.1177	18.792	18.0674	-0.7091	5.57675	4.24185	18.4746	-12.5724	5.27892				keep	10		down	18.9	10	9	18.9	17.7	80.679	0	31.293	323060000	10	724	10	10
Q9C0H9;A0A087WVV7;A0A590UJ70;A0A087X165;Q9C0H9-2;A0A087WU33;Q9C0H9-4	Q9C0H9;A0A087WVV7;A0A590UJ70;A0A087X165;Q9C0H9-2	SRC kinase signaling inhibitor 1	SRCIN1	sp|Q9C0H9|SRCN1_HUMAN SRC kinase signaling inhibitor 1 OS=Homo sapiens (Human) OX=9606 GN=SRCIN1 PE=1 SV=4;tr|A0A087WVV7|A0A087WVV7_HUMAN Isoform of Q9C0H9, SRC kinase-signaling inhibitor 1 (Fragment) OS=Homo sapiens (Human) OX=9606 GN=SRCIN1 PE=1 SV=1;tr|	194670	117510	192360	118030	216870	128840	184020	122820	191920	125240	214410	126460	7	17.5929	16.9263	17.5936	16.8645	17.6341	16.9056	-0.708067	6.34486	4.6925	17.2528	-16.0444	7.16309				keep	5		down	5.3	5	5	5.3	5.3	127.1	0	7.2885	41984000	5	1183	5	5
Q8IX21;Q8IX21-2;A0A3B3IRS8;B1AL16	Q8IX21;Q8IX21-2;A0A3B3IRS8;B1AL16	Protein FAM178A	FAM178A	sp|Q8IX21|SLF2_HUMAN SMC5-SMC6 complex localization factor protein 2 OS=Homo sapiens (Human) OX=9606 GN=SLF2 PE=1 SV=2;sp|Q8IX21-2|SLF2-2_HUMAN Isoform of Q8IX21, Isoform 2 of SMC5-SMC6 complex localization factor protein 2 OS=Homo sapiens (Human) OX=9606	115490	74992	125510	69684	121200	74009	109200	77906	125000	74232	120030	72566	4	16.8396	16.2783	16.9776	16.1043	16.7946	16.1058	-0.7078	4.85078	3.76015	16.5167	-9.9384	3.46455				keep	4		down	4.1	4	4	4.1	4.1	131.87	0	8.5547	47650000	4	1173	3	3
O15460;O15460-2;C9JCP0;C9JX45;A8MXE0;E7ERI1;E7ENX0;E7EPI9;C9JN43;C9JIG4	O15460;O15460-2	Prolyl 4-hydroxylase subunit alpha-2	P4HA2	sp|O15460|P4HA2_HUMAN Prolyl 4-hydroxylase subunit alpha-2 OS=Homo sapiens (Human) OX=9606 GN=P4HA2 PE=1 SV=1;sp|O15460-2|P4HA2-2_HUMAN Isoform of O15460, Isoform IIa of Prolyl 4-hydroxylase subunit alpha-2 OS=Homo sapiens (Human) OX=9606 GN=P4HA2 PE=1 SV=	1783100	955200	1659200	1000500	1600200	1091700	1685000	1010900	1651400	1056400	1591300	1066000	10	20.7882	19.9493	20.7022	19.948	20.5174	19.9885	-0.707333	4.81816	3.73924	20.3156	-9.83269	3.38263				keep	15		down	37.4	15	15	37.4	37.4	60.901	0	67.544	1759300000	16	535	16	16
Q9UHB6;F8VQE1;Q9UHB6-2;F8VS07;Q9UHB6-3;F8VRN8;F8VTU2;F8VVQ7	Q9UHB6;F8VQE1;Q9UHB6-2;F8VS07;Q9UHB6-3;F8VRN8	LIM domain and actin-binding protein 1	LIMA1	sp|Q9UHB6|LIMA1_HUMAN LIM domain and actin-binding protein 1 OS=Homo sapiens (Human) OX=9606 GN=LIMA1 PE=1 SV=1;tr|F8VQE1|F8VQE1_HUMAN Isoform of Q9UHB6, LIM zinc-binding domain-containing protein OS=Homo sapiens (Human) OX=9606 GN=LIMA1 PE=1 SV=1;sp|Q9UHB	2246100	1272500	2240100	1250400	2041600	1425100	2122900	1339600	2227000	1328200	2030200	1390400	8	21.1212	20.3631	21.1353	20.2697	20.8689	20.373	-0.706533	4.53018	3.53037	20.6885	-8.9366	2.6546				keep	28		down	49.4	28	1	49.4	1.8	85.225	0	177.25	2070400000	41	759	36	36
O43149;O43149-3;I3L3Q3;I3L1Q8;I3L141;O43149-2	O43149;O43149-3	Zinc finger ZZ-type and EF-hand domain-containing protein 1	ZZEF1	sp|O43149|ZZEF1_HUMAN Zinc finger ZZ-type and EF-hand domain-containing protein 1 OS=Homo sapiens (Human) OX=9606 GN=ZZEF1 PE=1 SV=6;sp|O43149-3|ZZEF1-3_HUMAN Isoform of O43149, Isoform 3 of Zinc finger ZZ-type and EF-hand domain-containing protein 1 OS=Ho	852380	519730	921180	568450	1072100	630830	805800	543450	916430	603720	1059200	619460	6	19.7234	19.0713	19.8533	19.1324	19.9396	19.1973	-0.7051	5.02687	3.88494	19.4862	-10.5257	3.90557				keep	23		down	10.2	23	23	10.2	10.2	331.07	0	71.176	390340000	23	2961	23	23
P54886-2	P54886-2	Delta-1-pyrroline-5-carboxylate synthase;Glutamate 5-kinase;Gamma-glutamyl phosphate reductase	ALDH18A1	sp|P54886-2|P5CS-2_HUMAN Isoform of P54886, Isoform Short of Delta-1-pyrroline-5-carboxylate synthase OS=Homo sapiens (Human) OX=9606 GN=ALDH18A1 PE=1 SV=2	4932700	2697900	4759100	2891700	4472900	2989400	4661700	2850000	4734700	3047600	4449900	2921100	1	22.2562	21.4473	22.2224	21.4792	22.0004	21.4418	-0.703567	4.80134	3.72774	21.8079	-9.77337	3.33631				keep	30		down	45.6	30	1	45.6	3.8	87.088	0	135.24	16294000000	54	793	43	43
Q5VV67;Q5VV67-2;E7EVG6;X6R7H2	Q5VV67;Q5VV67-2;E7EVG6	Peroxisome proliferator-activated receptor gamma coactivator-related protein 1	PPRC1	sp|Q5VV67|PPRC1_HUMAN Peroxisome proliferator-activated receptor gamma coactivator-related protein 1 OS=Homo sapiens (Human) OX=9606 GN=PPRC1 PE=1 SV=1;sp|Q5VV67-2|PPRC1-2_HUMAN Isoform of Q5VV67, Isoform 2 of Peroxisome proliferator-activated receptor gam	204820	126700	200530	117270	225500	138470	193630	132060	200240	124950	222870	135740	4	17.6662	17.0349	17.6536	16.8552	17.6903	17.0096	-0.703467	5.44009	4.14388	17.3183	-12.0315	4.93831				keep	10		down	10.3	10	10	10.3	10.3	177.54	0	31.718	111630000	10	1664	9	9
P57087;P57087-2;H0YEX9;P57087-3	P57087;P57087-2;H0YEX9;P57087-3	Junctional adhesion molecule B	JAM2	sp|P57087|JAM2_HUMAN Junctional adhesion molecule B OS=Homo sapiens (Human) OX=9606 GN=JAM2 PE=1 SV=1;sp|P57087-2|JAM2-2_HUMAN Isoform of P57087, Isoform 2 of Junctional adhesion molecule B OS=Homo sapiens (Human) OX=9606 GN=JAM2 PE=1 SV=1;tr|H0YEX9|H0YEX9	90435	64849	94603	54149	110990	60168	85538	66681	94764	58018	109310	59290	4	16.4868	16.0687	16.5698	15.7404	16.6677	15.8071	-0.7027	4.05948	3.19046	16.2234	-7.6255	1.46662				keep	4		down	14.8	4	4	14.8	14.8	33.207	0	13.354	54775000	4	298	4	4
Q13247;Q13247-3	Q13247;Q13247-3	Serine/arginine-rich splicing factor 6	SRSF6	sp|Q13247|SRSF6_HUMAN Serine/arginine-rich splicing factor 6 OS=Homo sapiens (Human) OX=9606 GN=SRSF6 PE=1 SV=2;sp|Q13247-3|SRSF6-3_HUMAN Isoform of Q13247, Isoform SRP55-3 of Serine/arginine-rich splicing factor 6 OS=Homo sapiens (Human) OX=9606 GN=SRSF6	1860200	714000	1353100	1093500	1333600	960550	1756600	787130	1347200	1124800	1337800	936140	2	20.8493	19.5295	20.408	20.0762	20.2545	19.8039	-0.700733	2.29882	1.88086	20.1536	-3.92055	-2.96066				keep	6		down	17.2	9	1	23.3	2.3	39.586	0	23.841	3574600000	5	344	5	5
Q13796;C9IZC6;F5H3B6	Q13796	Protein Shroom2	SHROOM2	sp|Q13796|SHRM2_HUMAN Protein Shroom2 OS=Homo sapiens (Human) OX=9606 GN=SHROOM2 PE=1 SV=1	616130	351010	616890	360130	595620	403560	582340	369300	613560	381590	591760	394140	3	19.2551	18.505	19.2748	18.4739	19.0916	18.5528	-0.6966	5.2644	4.03716	18.8589	-11.3695	4.5005				keep	16		down	12.9	16	16	12.9	12.9	176.41	0	37.198	532570000	16	1616	15	15
Q14CB8;Q14CB8-7;Q14CB8-2;Q14CB8-6;Q14CB8-3;R4GMS4;Q14CB8-5;R4GNI4;Q14CB8-4	Q14CB8;Q14CB8-7;Q14CB8-2;Q14CB8-6;Q14CB8-3;R4GMS4;Q14CB8-5	Rho GTPase-activating protein 19	ARHGAP19	sp|Q14CB8|RHG19_HUMAN Rho GTPase-activating protein 19 OS=Homo sapiens (Human) OX=9606 GN=ARHGAP19 PE=1 SV=1;sp|Q14CB8-7|RHG19-7_HUMAN Isoform of Q14CB8, Isoform 7 of Rho GTPase-activating protein 19 OS=Homo sapiens (Human) OX=9606 GN=ARHGAP19 PE=1 SV=1;sp	267860	167320	291010	177490	329630	195150	253240	174520	289680	188500	325800	191590	9	18.0533	17.4361	18.1909	17.4531	18.2381	17.5046	-0.696167	5.3536	4.08991	17.8127	-11.7009	4.72266				keep	9		down	24.1	9	9	24.1	24.1	55.756	0	33.359	215090000	10	494	9	9
Q2NL82;I3L1Q5;I3L4T0	Q2NL82	Pre-rRNA-processing protein TSR1 homolog	TSR1	sp|Q2NL82|TSR1_HUMAN Pre-rRNA-processing protein TSR1 homolog OS=Homo sapiens (Human) OX=9606 GN=TSR1 PE=1 SV=1	3425100	2078200	3560400	2121900	3715200	2319200	3237900	2172600	3545200	2250600	3680400	2272000	3	21.7299	21.0708	21.8038	21.0326	21.7326	21.0756	-0.695767	6.18243	4.60033	21.4076	-15.2414	6.76803				keep	26		down	41.2	26	25	41.2	39.4	91.809	0	116.93	3097000000	41	804	37	37
Q86Y56;Q86Y56-2;H0Y650;E9PGY2;Q86Y56-3;H7C3B1	Q86Y56;Q86Y56-2;H0Y650	Dynein assembly factor 5, axonemal	DNAAF5	sp|Q86Y56|DAAF5_HUMAN Dynein assembly factor 5, axonemal OS=Homo sapiens (Human) OX=9606 GN=DNAAF5 PE=1 SV=4;sp|Q86Y56-2|DAAF5-2_HUMAN Isoform of Q86Y56, Isoform 2 of Dynein assembly factor 5, axonemal OS=Homo sapiens (Human) OX=9606 GN=DNAAF5 PE=1 SV=4;tr	1988000	1236600	2181500	1348200	2523700	1485200	1879500	1290600	2170600	1431200	2493700	1458400	6	20.9451	20.3218	21.097	20.3783	21.1747	20.4326	-0.6947	4.92812	3.81555	20.7249	-10.1915	3.65747				keep	25		down	39.2	25	25	39.2	39.2	93.52	0	81.349	1832700000	31	855	28	28
P28289;P28289-2	P28289;P28289-2	Tropomodulin-1	TMOD1	sp|P28289|TMOD1_HUMAN Tropomodulin-1 OS=Homo sapiens (Human) OX=9606 GN=TMOD1 PE=1 SV=1;sp|P28289-2|TMOD1-2_HUMAN Isoform of P28289, Isoform 2 of Tropomodulin-1 OS=Homo sapiens (Human) OX=9606 GN=TMOD1 PE=1 SV=1	75158	41339	69304	42787	76033	50694	71030	43608	69087	45323	75392	49540	2	16.2199	15.4191	16.1208	15.4006	16.1219	15.5599	-0.694333	5.31966	4.07058	15.807	-11.5724	4.63722				keep	3		down	16.7	3	3	16.7	16.7	40.569	0	27.482	55960000	3	359	3	3
Q9UHR4	Q9UHR4	Brain-specific angiogenesis inhibitor 1-associated protein 2-like protein 1	BAIAP2L1	sp|Q9UHR4|BI2L1_HUMAN Brain-specific angiogenesis inhibitor 1-associated protein 2-like protein 1 OS=Homo sapiens (Human) OX=9606 GN=BAIAP2L1 PE=1 SV=2	452650	278670	476880	269410	510920	332710	427930	290960	474630	287880	505670	325410	1	18.8103	18.1721	18.9034	18.0552	18.8703	18.2743	-0.694133	5.07727	3.91541	18.5143	-10.7001	4.0321				keep	12		down	32.9	12	12	32.9	32.9	56.882	0	46.623	255350000	11	511	10	10
Q9NUE0;Q9NUE0-2;H0YEN1;E9PJS3	Q9NUE0;Q9NUE0-2;H0YEN1	Palmitoyltransferase ZDHHC18	ZDHHC18	sp|Q9NUE0|ZDH18_HUMAN Palmitoyltransferase ZDHHC18 OS=Homo sapiens (Human) OX=9606 GN=ZDHHC18 PE=1 SV=2;sp|Q9NUE0-2|ZDH18-2_HUMAN Isoform of Q9NUE0, Isoform 2 of Palmitoyltransferase ZDHHC18 OS=Homo sapiens (Human) OX=9606 GN=ZDHHC18 PE=1 SV=2;tr|H0YEN1|H0	122850	65626	120550	67485	98662	74828	116100	69541	119670	71358	98566	72802	4	16.9288	16.0859	16.9194	16.058	16.4978	16.1217	-0.693467	3.45499	2.74054	16.4353	-6.16789	-0.062392				keep	4		down	15.7	4	4	15.7	15.7	42.03	0	8.7191	50015000	4	388	4	4
Q9C040;Q9C040-2;A0A0J9YX34;A0A0J9YW70;C9JVI3;A0A0J9YY97;A0A0J9YXY2;C9J084	Q9C040;Q9C040-2;A0A0J9YX34	Tripartite motif-containing protein 2	TRIM2	sp|Q9C040|TRIM2_HUMAN Tripartite motif-containing protein 2 OS=Homo sapiens (Human) OX=9606 GN=TRIM2 PE=1 SV=1;sp|Q9C040-2|TRIM2-2_HUMAN Isoform of Q9C040, Isoform 2 of Tripartite motif-containing protein 2 OS=Homo sapiens (Human) OX=9606 GN=TRIM2 PE=1 SV=	562870	361720	625310	373030	713550	422320	532190	376320	622440	397290	704820	414610	8	19.1247	18.5484	19.2944	18.5247	19.3522	18.6183	-0.6933	4.9431	3.82454	18.9104	-10.2412	3.69483				keep	13		down	21.9	13	11	21.9	19.1	81.529	0	32.28	376640000	10	744	10	10
Q9HDC5	Q9HDC5	Junctophilin-1	JPH1	sp|Q9HDC5|JPH1_HUMAN Junctophilin-1 OS=Homo sapiens (Human) OX=9606 GN=JPH1 PE=1 SV=2	249840	148120	254690	159560	272100	166760	236170	155200	253690	168520	269610	163490	1	17.9529	17.2603	17.9985	17.2995	17.9614	17.2778	-0.691733	6.35556	4.70115	17.6251	-16.101	7.19013				keep	3		down	5.6	3	3	5.6	5.6	71.685	0	8.8945	206440000	4	661	3	3
Q96EN8	Q96EN8	Molybdenum cofactor sulfurase	MOCOS	sp|Q96EN8|MOCOS_HUMAN Molybdenum cofactor sulfurase OS=Homo sapiens (Human) OX=9606 GN=MOCOS PE=1 SV=2	45176	25056	45621	27710	49510	33741	42695	26447	45336	29390	49108	32947	1	15.4855	14.6968	15.5176	14.7738	15.503	14.9726	-0.687633	4.69037	3.64568	15.1582	-9.42451	3.05867				keep	3		down	4.4	3	3	4.4	4.4	98.119	0.00012441	3.4064	68754000	3	888	2	2
Q8TAQ5;Q494X3;A0A087WSV7;Q8TAQ5-2	Q8TAQ5;Q494X3;A0A087WSV7;Q8TAQ5-2	Zinc finger protein 420;Zinc finger protein 404	ZNF420;ZNF404	sp|Q8TAQ5|ZN420_HUMAN Zinc finger protein 420 OS=Homo sapiens (Human) OX=9606 GN=ZNF420 PE=1 SV=1;sp|Q494X3|ZN404_HUMAN Zinc finger protein 404 OS=Homo sapiens (Human) OX=9606 GN=ZNF404 PE=1 SV=2;tr|A0A087WSV7|A0A087WSV7_HUMAN Isoform of Q494X3, Zinc finge	70583	38330	63333	36149	50595	37496	66703	40475	63122	38110	50579	36508	4	16.1293	15.3101	15.9908	15.1574	15.5343	15.1248	-0.687367	2.77806	2.24588	15.5411	-4.78112	-1.76666				keep	2		down	7.8	2	2	7.8	7.8	80.246	0.00012561	3.5763	37734000	2	688	2	2
Q01974;B1APY4;Q01973;Q01973-3;A0A0A0MTJ5	Q01974;B1APY4	Tyrosine-protein kinase transmembrane receptor ROR2	ROR2	sp|Q01974|ROR2_HUMAN Tyrosine-protein kinase transmembrane receptor ROR2 OS=Homo sapiens (Human) OX=9606 GN=ROR2 PE=1 SV=2;tr|B1APY4|B1APY4_HUMAN Isoform of Q01974, Receptor tyrosine kinase-like orphan receptor 2, isoform CRA_b OS=Homo sapiens (Human) OX=9	293840	177560	292650	178930	310850	193580	277770	185590	291890	189430	307970	189660	5	18.1869	17.5218	18.199	17.4648	18.1534	17.4929	-0.6866	6.27246	4.64016	17.8365	-15.6843	6.98861				keep	10		down	14	10	10	14	14	104.76	0	29.861	240870000	11	943	10	10
Q7L0J3;Q7L0J3-2	Q7L0J3;Q7L0J3-2	Synaptic vesicle glycoprotein 2A	SV2A	sp|Q7L0J3|SV2A_HUMAN Synaptic vesicle glycoprotein 2A OS=Homo sapiens (Human) OX=9606 GN=SV2A PE=1 SV=1;sp|Q7L0J3-2|SV2A-2_HUMAN Isoform of Q7L0J3, Isoform 2 of Synaptic vesicle glycoprotein 2A OS=Homo sapiens (Human) OX=9606 GN=SV2A PE=1 SV=1	409430	242960	412420	241140	413450	274640	387020	254480	410720	255880	410260	268420	2	18.6655	17.9742	18.6939	17.8952	18.5649	17.9975	-0.6858	5.56384	4.23359	18.2985	-12.5167	5.2445				keep	7		down	10.9	7	7	10.9	10.9	82.694	0	52.719	184610000	9	742	9	9
A0A087WX23;A0A087WUL4;Q86TG7;A0A087WXK2;A0A087WYS2	A0A087WX23;A0A087WUL4;Q86TG7;A0A087WXK2	Retrotransposon-derived protein PEG10	PEG10	tr|A0A087WX23|A0A087WX23_HUMAN Isoform of Q86TG7, CCHC-type domain-containing protein OS=Homo sapiens (Human) OX=9606 GN=PEG10 PE=1 SV=1;tr|A0A087WUL4|A0A087WUL4_HUMAN Isoform of Q86TG7, CCHC-type domain-containing protein OS=Homo sapiens (Human) OX=9606 G	4483100	2501400	4993600	3120000	5660600	3752600	4237100	2643300	4948700	3305600	5609700	3667900	5	22.1183	21.3382	22.2918	21.5888	22.3401	21.7698	-0.684467	3.43925	2.72975	21.9078	-6.13294	-0.10216				keep	23		down	47.5	23	9	47.5	20.3	88.209	0	120.89	5376800000	46	783	43	43
Q8NFX7;Q8NFX7-2	Q8NFX7;Q8NFX7-2	Syntaxin-binding protein 6	STXBP6	sp|Q8NFX7|STXB6_HUMAN Syntaxin-binding protein 6 OS=Homo sapiens (Human) OX=9606 GN=STXBP6 PE=1 SV=2;sp|Q8NFX7-2|STXB6-2_HUMAN Isoform of Q8NFX7, Isoform 2 of Syntaxin-binding protein 6 OS=Homo sapiens (Human) OX=9606 GN=STXBP6 PE=1 SV=2	319730	196330	333870	206550	379490	231730	302260	205020	332660	219070	375380	227210	2	18.3087	17.6668	18.3891	17.6719	18.4413	17.7524	-0.682667	5.61439	4.26201	18.0384	-12.7272	5.3737				keep	4		down	18.1	4	4	18.1	18.1	23.554	0	6.7791	148770000	5	210	5	5
Q6P5R6;C9JYQ9;H0Y8C2	Q6P5R6;C9JYQ9;H0Y8C2	60S ribosomal protein L22-like 1	RPL22L1	sp|Q6P5R6|RL22L_HUMAN 60S ribosomal protein L22-like 1 OS=Homo sapiens (Human) OX=9606 GN=RPL22L1 PE=1 SV=2;tr|C9JYQ9|C9JYQ9_HUMAN Isoform of Q6P5R6, 60S ribosomal protein L22-like 1 OS=Homo sapiens (Human) OX=9606 GN=RPL22L1 PE=1 SV=1;tr|H0Y8C2|H0Y8C2_HUM	313200	211030	315440	192140	375280	212310	296180	218160	315840	204570	370230	208830	3	18.279	17.771	18.3072	17.5675	18.4252	17.6262	-0.682233	4.85699	3.76401	17.996	-9.95552	3.47774				keep	3		down	39.3	3	3	39.3	39.3	14.606	0	35.819	373940000	4	122	3	3
Q9UKU0;Q9UKU0-9;A0A494BZW8;A0A494C0B6;A0A494C0J9;E7ERD7;C9J8C7;A0A494C116;Q9UKU0-2;A0A499FJL5;Q9UKU0-8;Q9UKU0-6;Q9UKU0-5;Q9UKU0-3;Q9UKU0-7;A0A494C046;Q9UKU0-1;A0A494C1I9;A0A494C005;A0A494C0A5	Q9UKU0;Q9UKU0-9;A0A494BZW8;A0A494C0B6;A0A494C0J9;E7ERD7;C9J8C7;A0A494C116;Q9UKU0-2;A0A499FJL5;Q9UKU0-8;Q9UKU0-6;Q9UKU0-5;Q9UKU0-3;Q9UKU0-7;A0A494C046;Q9UKU0-1;A0A494C1I9;A0A494C005;A0A494C0A5	Long-chain-fatty-acid--CoA ligase 6	ACSL6	sp|Q9UKU0|ACSL6_HUMAN Long-chain-fatty-acid--CoA ligase 6 OS=Homo sapiens (Human) OX=9606 GN=ACSL6 PE=1 SV=4;sp|Q9UKU0-9|ACSL6-9_HUMAN Isoform of Q9UKU0, Isoform 9 of Long-chain-fatty-acid--CoA ligase 6 OS=Homo sapiens (Human) OX=9606 GN=ACSL6 PE=1 SV=4;tr	71249	43760	69712	43743	77619	47449	67357	45646	69641	46279	76837	46522	20	16.1428	15.5012	16.1293	15.4325	16.1517	15.4644	-0.675233	6.22915	4.62525	15.8036	-15.4687	6.88206				keep	3		down	5	3	3	5	5	77.751	0	5.7201	29800000	4	697	4	4
Q7Z5L2;Q7Z5L2-2;A0A384DVK4	Q7Z5L2;Q7Z5L2-2;A0A384DVK4	Coiled-coil domain-containing protein R3HCC1L	R3HCC1L	sp|Q7Z5L2|R3HCL_HUMAN Coiled-coil domain-containing protein R3HCC1L OS=Homo sapiens (Human) OX=9606 GN=R3HCC1L PE=1 SV=3;sp|Q7Z5L2-2|R3HCL-2_HUMAN Isoform of Q7Z5L2, Isoform 2 of Coiled-coil domain-containing protein R3HCC1L OS=Homo sapiens (Human) OX=9606	194890	120760	208600	123370	218490	140640	184250	126030	207630	131000	216510	137620	3	17.5945	16.9657	17.7105	16.9284	17.6448	17.032	-0.674567	5.64016	4.27984	17.3126	-12.8288	5.43535				keep	6		down	11.7	6	6	11.7	11.7	87.882	0	34.4	155550000	6	792	6	6
Q9Y4F1;C9JME2;Q9Y4F1-2;M0QXT1;A0A1B0GV68;M0QYB0;H0Y783;M0R262;Q9Y4F1-3	Q9Y4F1;C9JME2;Q9Y4F1-2	FERM, RhoGEF and pleckstrin domain-containing protein 1	FARP1	sp|Q9Y4F1|FARP1_HUMAN FERM, ARHGEF and pleckstrin domain-containing protein 1 OS=Homo sapiens (Human) OX=9606 GN=FARP1 PE=1 SV=1;tr|C9JME2|C9JME2_HUMAN Isoform of Q9Y4F1, FERM, ARHGEF and pleckstrin domain-containing protein 1 OS=Homo sapiens (Human) OX=96	632470	339990	655180	412090	654260	457930	597690	360360	650070	433890	651100	446730	9	19.2929	18.459	19.3617	18.6683	19.2271	18.7351	-0.6731	4.4034	3.43673	18.9574	-8.56747	2.33588				keep	11		down	14.8	11	11	14.8	14.8	118.63	0	53.91	373510000	13	1045	12	12
Q8TCG1;A0A087X211;Q8TCG1-2;F8WAX6	Q8TCG1;A0A087X211;Q8TCG1-2	Protein CIP2A	KIAA1524	sp|Q8TCG1|CIP2A_HUMAN Protein CIP2A OS=Homo sapiens (Human) OX=9606 GN=CIP2A PE=1 SV=2;tr|A0A087X211|A0A087X211_HUMAN Isoform of Q8TCG1, Protein CIP2A OS=Homo sapiens (Human) OX=9606 GN=CIP2A PE=1 SV=1;sp|Q8TCG1-2|CIP2A-2_HUMAN Isoform of Q8TCG1, Isoform 2	622000	340070	660980	437340	711990	465890	587830	359890	655990	459540	707140	455590	4	19.2688	18.4594	19.3744	18.7541	19.3491	18.76	-0.672933	4.12033	3.23255	18.9943	-7.78496	1.61978				keep	13		down	19.1	13	13	19.1	19.1	102.18	0	25.996	342370000	13	905	13	13
Q9H9A7;A0A0A0MSU3	Q9H9A7;A0A0A0MSU3	RecQ-mediated genome instability protein 1	RMI1	sp|Q9H9A7|RMI1_HUMAN RecQ-mediated genome instability protein 1 OS=Homo sapiens (Human) OX=9606 GN=RMI1 PE=1 SV=3;tr|A0A0A0MSU3|A0A0A0MSU3_HUMAN Isoform of Q9H9A7, DUF1767 domain-containing protein (Fragment) OS=Homo sapiens (Human) OX=9606 GN=RMI1 PE=1 SV	410650	229000	412470	270180	442690	287710	388110	241540	410360	284140	439540	281420	2	18.6698	17.8889	18.6941	18.0593	18.6635	18.0646	-0.671533	5.26043	4.03668	18.34	-11.3558	4.49118				keep	10		down	22.6	10	10	22.6	22.6	70.144	0	35.722	255010000	11	625	9	9
P16260;V9GZ24	P16260	Graves disease carrier protein	SLC25A16	sp|P16260|GDC_HUMAN Graves disease carrier protein OS=Homo sapiens (Human) OX=9606 GN=SLC25A16 PE=1 SV=3	334510	183780	327400	184720	249220	190950	316140	194090	325380	194640	249590	185710	2	18.3739	17.5715	18.3609	17.5107	17.8346	17.4732	-0.671333	2.82762	2.28161	17.8541	-4.87527	-1.64241				keep	7		down	28.9	7	7	28.9	28.9	36.223	0	16.464	187480000	8	332	7	7
Q8IX30;Q8IX30-2	Q8IX30;Q8IX30-2	Signal peptide, CUB and EGF-like domain-containing protein 3	SCUBE3	sp|Q8IX30|SCUB3_HUMAN Signal peptide, CUB and EGF-like domain-containing protein 3 OS=Homo sapiens (Human) OX=9606 GN=SCUBE3 PE=1 SV=1;sp|Q8IX30-2|SCUB3-2_HUMAN Isoform of Q8IX30, Isoform 2 of Signal peptide, CUB and EGF-like domain-containing protein 3 OS	8627.5	4871.6	9469.4	6093.2	10956	7166.8	8154.2	5139.3	9395.2	6441.7	10857	7008.5	2	13.0969	12.3341	13.2492	12.5887	13.327	12.7375	-0.670933	3.49235	2.76726	12.8889	-6.2514	0.0320011				keep	2		down	2.5	2	2	2.5	2.5	109.28	0.00012577	3.606	8715900	2	993	2	2
P04216;E9PIM6;E9PNQ8;J3QRJ3	P04216;E9PIM6;E9PNQ8;J3QRJ3	Thy-1 membrane glycoprotein	THY1	sp|P04216|THY1_HUMAN Thy-1 membrane glycoprotein OS=Homo sapiens (Human) OX=9606 GN=THY1 PE=1 SV=2;tr|E9PIM6|E9PIM6_HUMAN Isoform of P04216, Ig-like domain-containing protein (Fragment) OS=Homo sapiens (Human) OX=9606 GN=THY1 PE=1 SV=8;tr|E9PNQ8|E9PNQ8_HUM	99939	64435	108460	64885	108820	67116	94493	66986	108070	68674	107880	65781	4	16.631	16.0594	16.767	16.0013	16.6392	15.9647	-0.6706	5.43652	4.14146	16.3438	-12.0179	4.92955				keep	3		down	24.2	3	3	24.2	24.2	17.935	0	13.046	115850000	5	161	4	4
Q8NFW9;Q8NFW9-2;Q8NFW9-5;Q8NFW9-4;Q8NFW9-3;Q8NFW9-6;F8WFC5	Q8NFW9;Q8NFW9-2;Q8NFW9-5;Q8NFW9-4;Q8NFW9-3;Q8NFW9-6	Rab effector MyRIP	MYRIP	sp|Q8NFW9|MYRIP_HUMAN Rab effector MyRIP OS=Homo sapiens (Human) OX=9606 GN=MYRIP PE=1 SV=2;sp|Q8NFW9-2|MYRIP-2_HUMAN Isoform of Q8NFW9, Isoform 2 of Rab effector MyRIP OS=Homo sapiens (Human) OX=9606 GN=MYRIP PE=1 SV=2;sp|Q8NFW9-5|MYRIP-5_HUMAN Isoform of	86722	58714	90590	53795	100410	59525	82010	60703	90565	57241	99230	58433	7	16.4263	15.9253	16.5072	15.7309	16.5231	15.7916	-0.6696	5.07883	3.91587	16.1507	-10.7045	4.03529				keep	4		down	5.6	4	4	5.6	5.6	95.705	0	8.6467	24168000	4	859	4	4
P29317;P29317-2	P29317	Ephrin type-A receptor 2	EPHA2	sp|P29317|EPHA2_HUMAN Ephrin type-A receptor 2 OS=Homo sapiens (Human) OX=9606 GN=EPHA2 PE=1 SV=2	1148100	699830	1150100	695300	1185200	767360	1085300	730850	1147100	736020	1175600	750700	2	20.153	19.5005	20.1735	19.423	20.0843	19.4799	-0.669133	5.86967	4.40782	19.8024	-13.8096	6.00588				keep	22		down	32.4	22	21	32.4	31.2	108.27	0	84.773	911890000	23	976	23	23
Q8N370;Q8N370-4;Q8N370-2;Q8N370-3	Q8N370;Q8N370-4;Q8N370-2;Q8N370-3	Large neutral amino acids transporter small subunit 4	SLC43A2	sp|Q8N370|LAT4_HUMAN Large neutral amino acids transporter small subunit 4 OS=Homo sapiens (Human) OX=9606 GN=SLC43A2 PE=1 SV=1;sp|Q8N370-4|LAT4-4_HUMAN Isoform of Q8N370, Isoform 4 of Large neutral amino acids transporter small subunit 4 OS=Homo sapiens (	175390	114420	157650	94601	172890	105700	165840	118470	158390	100500	171040	103630	4	17.4424	16.8879	17.3065	16.5453	17.3071	16.62	-0.6676	3.90257	3.07165	17.0182	-7.22397	1.06931				keep	3		down	6.2	3	3	6.2	6.2	62.746	0	12.435	216870000	5	569	4	4
Q8IYU8;A0A0A0MTD5	Q8IYU8;A0A0A0MTD5	Calcium uptake protein 2, mitochondrial	MICU2	sp|Q8IYU8|MICU2_HUMAN Calcium uptake protein 2, mitochondrial OS=Homo sapiens (Human) OX=9606 GN=MICU2 PE=1 SV=2;tr|A0A0A0MTD5|A0A0A0MTD5_HUMAN Isoform of Q8IYU8, Calcium uptake protein 2, mitochondrial (Fragment) OS=Homo sapiens (Human) OX=9606 GN=MICU2 P	755980	428770	738690	467280	757720	505670	714520	451150	735820	492220	752930	494140	2	19.5502	18.7937	19.5348	18.8496	19.4389	18.8782	-0.667467	5.67366	4.29671	19.1742	-12.9694	5.51974				keep	10		down	31.1	10	10	31.1	31.1	49.666	0	34.172	540540000	11	434	11	11
P78310;P78310-2;P78310-6;P78310-7;P78310-5;P78310-4;P78310-3	P78310;P78310-2;P78310-6;P78310-7;P78310-5	Coxsackievirus and adenovirus receptor	CXADR	sp|P78310|CXAR_HUMAN Coxsackievirus and adenovirus receptor OS=Homo sapiens (Human) OX=9606 GN=CXADR PE=1 SV=1;sp|P78310-2|CXAR-2_HUMAN Isoform of P78310, Isoform 2 of Coxsackievirus and adenovirus receptor OS=Homo sapiens (Human) OX=9606 GN=CXADR PE=1 SV=	1643300	928910	1587600	1008200	1581500	1058000	1553200	977590	1582000	1060300	1572800	1033800	7	20.6704	19.9091	20.6386	19.9591	20.5004	19.9433	-0.665967	5.35164	4.08991	20.2702	-11.6949	4.71872				keep	13		down	45.2	13	13	45.2	45.2	40.029	0	48.529	2223000000	22	365	22	22
P02458;P02458-1;P02458-3;P05997	P02458;P02458-1	Collagen alpha-1(II) chain;Collagen alpha-1(II) chain;Chondrocalcin	COL2A1	sp|P02458|CO2A1_HUMAN Collagen alpha-1(II) chain OS=Homo sapiens (Human) OX=9606 GN=COL2A1 PE=1 SV=3;sp|P02458-1|CO2A1-1_HUMAN Isoform of P02458, Isoform 1 of Collagen alpha-1(II) chain OS=Homo sapiens (Human) OX=9606 GN=COL2A1 PE=1 SV=3	1104500	656850	1147100	751660	1297800	802340	1044100	688220	1142500	792200	1285800	786290	4	20.0972	19.4091	20.1697	19.5354	20.2152	19.5442	-0.664467	5.30892	4.06399	19.8285	-11.5321	4.61029				keep	19		down	17.8	19	19	17.8	17.8	141.78	0	92.427	929480000	22	1487	20	20
A0A5F9UQ55;P57775	A0A5F9UQ55		FBXW4	tr|A0A5F9UQ55|A0A5F9UQ55_HUMAN Isoform of P57775, F-box/WD repeat-containing protein 4 OS=Homo sapiens (Human) OX=9606 GN=FBXW4 PE=1 SV=1	60701	35305	55686	36688	61456	38774	57375	37006	55679	38605	60953	37969	2	15.9117	15.1915	15.8052	15.1787	15.8148	15.1732	-0.662767	5.86967	4.40671	15.5125	-13.8019	6.00155				keep	3		down	6.5	3	3	6.5	6.5	61.811	0	7.3746	37362000	3	567	3	3
Q9UNW1;Q9UNW1-4;Q9UNW1-3;Q9UNW1-2	Q9UNW1;Q9UNW1-4	Multiple inositol polyphosphate phosphatase 1	MINPP1	sp|Q9UNW1|MINP1_HUMAN Multiple inositol polyphosphate phosphatase 1 OS=Homo sapiens (Human) OX=9606 GN=MINPP1 PE=1 SV=1;sp|Q9UNW1-4|MINP1-4_HUMAN Isoform of Q9UNW1, Isoform 4 of Multiple inositol polyphosphate phosphatase 1 OS=Homo sapiens (Human) OX=9606	599100	348300	575850	363130	595580	393230	566280	365370	574470	382770	591530	384420	4	19.2147	18.4939	19.1755	18.4858	19.0915	18.5154	-0.6622	5.79048	4.35754	18.8295	-13.463	5.80912				keep	11		down	33.7	11	11	33.7	33.7	55.051	0	38.988	878370000	15	487	14	14
Q9UHN6;Q9UHN6-2;B4E1B9;F5H6B2;H3BLX9;H3BLY0	Q9UHN6;Q9UHN6-2	Transmembrane protein 2	TMEM2	sp|Q9UHN6|CEIP2_HUMAN Cell surface hyaluronidase OS=Homo sapiens (Human) OX=9606 GN=CEMIP2 PE=1 SV=1;sp|Q9UHN6-2|CEIP2-2_HUMAN Isoform of Q9UHN6, Isoform 2 of Cell surface hyaluronidase OS=Homo sapiens (Human) OX=9606 GN=CEMIP2 PE=1 SV=1	1320200	808600	1314100	821960	1383000	873920	1248000	843920	1311700	867730	1371600	855730	6	20.3545	19.709	20.3658	19.6644	20.3069	19.6675	-0.6621	6.12494	4.56543	20.0114	-14.9677	6.62829				keep	24		down	21.7	24	24	21.7	21.7	154.37	0	65.289	1021100000	24	1383	18	18
Q562E7;A0A0J9YXM6;Q562E7-4;I3L1G2;Q562E7-3	Q562E7;A0A0J9YXM6;Q562E7-4	WD repeat-containing protein 81	WDR81	sp|Q562E7|WDR81_HUMAN WD repeat-containing protein 81 OS=Homo sapiens (Human) OX=9606 GN=WDR81 PE=1 SV=2;tr|A0A0J9YXM6|A0A0J9YXM6_HUMAN Isoform of Q562E7, WD repeat-containing protein 81 OS=Homo sapiens (Human) OX=9606 GN=WDR81 PE=1 SV=1;sp|Q562E7-4|WDR81-	308850	172560	293210	182070	300890	210440	291900	181790	292160	192180	299140	205300	5	18.2588	17.4806	18.2017	17.4898	18.1065	17.6134	-0.661067	5.12321	3.94278	17.8585	-10.8603	4.14672				keep	4		down	2.1	4	4	2.1	2.1	211.69	0	7.0146	110420000	5	1941	4	4
O95470;H0Y3V8;H7BXL7	O95470	Sphingosine-1-phosphate lyase 1	SGPL1	sp|O95470|SGPL1_HUMAN Sphingosine-1-phosphate lyase 1 OS=Homo sapiens (Human) OX=9606 GN=SGPL1 PE=1 SV=3	864020	549600	908710	515440	861730	579510	816910	571850	905610	547440	855800	566130	3	19.7429	19.1519	19.8336	18.9912	19.6245	19.0748	-0.661033	4.73283	3.6804	19.4032	-9.56175	3.16898				keep	11		down	24.5	11	11	24.5	24.5	63.523	0	45.626	920040000	14	568	12	12
Q9NWT6;E9PL41	Q9NWT6;E9PL41	Hypoxia-inducible factor 1-alpha inhibitor	HIF1AN	sp|Q9NWT6|HIF1N_HUMAN Hypoxia-inducible factor 1-alpha inhibitor OS=Homo sapiens (Human) OX=9606 GN=HIF1AN PE=1 SV=2;tr|E9PL41|E9PL41_HUMAN Isoform of Q9NWT6, JmjC domain-containing protein (Fragment) OS=Homo sapiens (Human) OX=9606 GN=HIF1AN PE=1 SV=2	93412	45529	92031	71323	110010	70787	88253	48803	91391	74143	109370	69267	2	16.5336	15.5584	16.53	16.1378	16.6549	16.0416	-0.660233	2.73493	2.21299	16.2427	-4.70003	-1.87467				keep	5		down	25.5	5	5	25.5	25.5	40.285	0	16.987	70840000	4	349	4	4
Q96E52;H7BZX2;Q96E52-2	Q96E52;H7BZX2;Q96E52-2	Metalloendopeptidase OMA1, mitochondrial	OMA1	sp|Q96E52|OMA1_HUMAN Metalloendopeptidase OMA1, mitochondrial OS=Homo sapiens (Human) OX=9606 GN=OMA1 PE=1 SV=1;tr|H7BZX2|H7BZX2_HUMAN Isoform of Q96E52, Peptidase_M48 domain-containing protein (Fragment) OS=Homo sapiens (Human) OX=9606 GN=OMA1 PE=1 SV=1;s	114600	63915	102970	67373	108080	72093	108310	67287	102860	70796	107430	70450	3	16.8285	16.0478	16.692	16.0556	16.6293	16.0679	-0.6595	5.18709	3.98502	16.3868	-11.0886	4.30722				keep	2		down	4.8	2	2	4.8	4.8	60.12	0.0001294	4.1199	49625000	2	524	2	2
Q5JTJ3;Q5JTJ3-2;Q5JTJ3-3	Q5JTJ3;Q5JTJ3-2;Q5JTJ3-3	Cytochrome c oxidase assembly factor 6 homolog	COA6	sp|Q5JTJ3|COA6_HUMAN Cytochrome c oxidase assembly factor 6 homolog OS=Homo sapiens (Human) OX=9606 GN=COA6 PE=1 SV=1;sp|Q5JTJ3-2|COA6-2_HUMAN Isoform of Q5JTJ3, Isoform 2 of Cytochrome c oxidase assembly factor 6 homolog OS=Homo sapiens (Human) OX=9606 GN	895100	526970	838720	528020	872740	574430	846090	551800	837930	556820	866590	561610	3	19.7939	19.0912	19.718	19.026	19.6428	19.0621	-0.658467	5.50169	4.18575	19.389	-12.2733	5.0924				keep	4		down	33.6	4	4	33.6	33.6	14.116	0	25.655	757180000	6	125	6	6
Q9BPX6;F6XEV2;A0A0U1RRK1;A0A286YF11;Q9BPX6-3;Q9BPX6-2;E9PQV6;Q9BPX6-5;Q9BPX6-4;S4R3W3;S4R3V1;S4R3D7	Q9BPX6;F6XEV2;A0A0U1RRK1;A0A286YF11;Q9BPX6-3;Q9BPX6-2;E9PQV6;Q9BPX6-5;Q9BPX6-4;S4R3W3	Calcium uptake protein 1, mitochondrial	MICU1	sp|Q9BPX6|MICU1_HUMAN Calcium uptake protein 1, mitochondrial OS=Homo sapiens (Human) OX=9606 GN=MICU1 PE=1 SV=1;tr|F6XEV2|F6XEV2_HUMAN Isoform of Q9BPX6, Calcium uptake protein 1, mitochondrial OS=Homo sapiens (Human) OX=9606 GN=MICU1 PE=1 SV=2;tr|A0A0U1R	528830	318220	521330	329740	571370	367280	499910	332700	520280	348350	566460	359410	12	19.0347	18.3636	19.032	18.3467	19.0316	18.4169	-0.657033	6.13727	4.57187	18.7042	-15.0264	6.65848				keep	6		down	18.3	6	6	18.3	18.3	54.351	0	23.837	459810000	6	476	6	6
O60566;O60566-3;O60566-2;H0YN44;H0YMK5	O60566;O60566-3;O60566-2	Mitotic checkpoint serine/threonine-protein kinase BUB1 beta	BUB1B	sp|O60566|BUB1B_HUMAN Mitotic checkpoint serine/threonine-protein kinase BUB1 beta OS=Homo sapiens (Human) OX=9606 GN=BUB1B PE=1 SV=3;sp|O60566-3|BUB1B-3_HUMAN Isoform of O60566, Isoform 3 of Mitotic checkpoint serine/threonine-protein kinase BUB1 beta OS=	3494100	2285200	3707000	2280100	4280600	2604700	3303900	2371300	3699900	2421700	4232000	2554300	5	21.7587	21.2078	21.862	21.1364	21.937	21.243	-0.656833	5.13727	3.9553	21.5242	-10.9106	4.18237				keep	36		down	45.2	36	36	45.2	45.2	119.54	0	186.57	3887200000	47	1050	44	44
Q15746;Q15746-4;Q15746-2;Q15746-3;Q15746-6;Q15746-5;Q15746-11;Q15746-7;Q15746-9;D6R9C2	Q15746;Q15746-4;Q15746-2;Q15746-3;Q15746-6;Q15746-5;Q15746-11;Q15746-7	Myosin light chain kinase, smooth muscle;Myosin light chain kinase, smooth muscle, deglutamylated form	MYLK	sp|Q15746|MYLK_HUMAN Myosin light chain kinase, smooth muscle OS=Homo sapiens (Human) OX=9606 GN=MYLK PE=1 SV=4;sp|Q15746-4|MYLK-4_HUMAN Isoform of Q15746, Isoform 3B of Myosin light chain kinase, smooth muscle OS=Homo sapiens (Human) OX=9606 GN=MYLK PE=1	136440	89832	144570	80532	138350	92510	129010	93153	144210	85737	137290	90393	10	17.0801	16.5388	17.1816	16.313	16.9855	16.4277	-0.6559	4.45717	3.4788	16.7544	-8.72322	2.47178				keep	6		down	3.4	6	6	3.4	3.4	210.71	0	10.17	62487000	6	1914	5	5
Q02962;G3V5S4;A0A0A0MRH7;Q02962-3;Q02962-4;Q02962-2;Q5SZP1	Q02962;G3V5S4;A0A0A0MRH7;Q02962-3;Q02962-4;Q02962-2;Q5SZP1	Paired box protein Pax-2	PAX2	sp|Q02962|PAX2_HUMAN Paired box protein Pax-2 OS=Homo sapiens (Human) OX=9606 GN=PAX2 PE=1 SV=4;tr|G3V5S4|G3V5S4_HUMAN Isoform of Q02962, Paired domain-containing protein (Fragment) OS=Homo sapiens (Human) OX=9606 GN=PAX2 PE=1 SV=2;tr|A0A0A0MRH7|A0A0A0MRH7	19041	14378	26154	13430	24596	15578	18013	14781	25952	14421	24348	15252	7	14.239	13.8955	14.7149	13.7289	14.4937	13.8576	-0.6552	3.24786	2.58482	14.1549	-5.71901	-0.585239				keep	2		down	8.2	2	2	8.2	8.2	44.705	0	9.6897	32080000	2	417	2	2
Q9UNK0;I3L305;K7EQB1;I3L3D0;K7ER37	Q9UNK0;I3L305;K7EQB1	Syntaxin-8	STX8	sp|Q9UNK0|STX8_HUMAN Syntaxin-8 OS=Homo sapiens (Human) OX=9606 GN=STX8 PE=1 SV=2;tr|I3L305|I3L305_HUMAN Isoform of Q9UNK0, Syntaxin-8 (Fragment) OS=Homo sapiens (Human) OX=9606 GN=STX8 PE=1 SV=2;tr|K7EQB1|K7EQB1_HUMAN Isoform of Q9UNK0, t-SNARE coiled-coi	286080	176080	292820	182650	310370	199710	270450	183760	292020	192940	307840	195420	5	18.1483	17.5098	18.1998	17.4944	18.1512	17.5379	-0.6524	6.11805	4.56067	17.8402	-14.9355	6.61167				keep	6		down	34.3	6	6	34.3	34.3	26.906	0	21.816	416420000	8	236	6	6
P26440;A0A0S2Z4K7;A0A0A0MT83;P26440-2;H0YLC3;H7C4G6;H0YKV0;H0YN10;A0A087WVD3	P26440;A0A0S2Z4K7;A0A0A0MT83;P26440-2;H0YLC3;H7C4G6	Isovaleryl-CoA dehydrogenase, mitochondrial	IVD	sp|P26440|IVD_HUMAN Isovaleryl-CoA dehydrogenase, mitochondrial OS=Homo sapiens (Human) OX=9606 GN=IVD PE=1 SV=2;tr|A0A0S2Z4K7|A0A0S2Z4K7_HUMAN Isoform of P26440, Isovaleryl-CoA dehydrogenase isoform 2 (Fragment) OS=Homo sapiens (Human) OX=9606 GN=IVD PE=1	1824600	1043300	1719000	1045800	1609700	1144200	1724600	1096100	1714500	1102000	1603700	1115600	9	20.8214	20.0766	20.7533	20.0119	20.5259	20.0563	-0.651933	4.31876	3.37785	20.3742	-8.32696	2.12183				keep	11		down	31	11	11	31	31	46.65	0	24.898	1738400000	14	426	12	12
Q5T0B9;F5H055	Q5T0B9	Zinc finger protein 362	ZNF362	sp|Q5T0B9|ZN362_HUMAN Zinc finger protein 362 OS=Homo sapiens (Human) OX=9606 GN=ZNF362 PE=1 SV=1	176140	105130	172890	110050	172230	112170	166500	110000	172530	115700	171210	109710	2	17.4486	16.7657	17.4397	16.7635	17.3016	16.7057	-0.651667	5.36051	4.09366	17.0708	-11.7275	4.74024				keep	6		down	21.2	8	6	26	21.2	45.814	0	14.262	128700000	6	420	5	5
Q9NXF1;Q9NXF1-2;A0A0A0MSR3	Q9NXF1;Q9NXF1-2	Testis-expressed sequence 10 protein	TEX10	sp|Q9NXF1|TEX10_HUMAN Testis-expressed protein 10 OS=Homo sapiens (Human) OX=9606 GN=TEX10 PE=1 SV=2;sp|Q9NXF1-2|TEX10-2_HUMAN Isoform of Q9NXF1, Isoform 2 of Testis-expressed protein 10 OS=Homo sapiens (Human) OX=9606 GN=TEX10 PE=1 SV=2	2587600	1547400	2477900	1533700	2418600	1617300	2446000	1618100	2474500	1615800	2405000	1580300	3	21.3254	20.6453	21.2808	20.5643	21.1133	20.5555	-0.651467	4.83863	3.75166	20.9141	-9.89501	3.43102				keep	20		down	27.6	20	20	27.6	27.6	105.67	0	63.087	2722900000	26	929	24	24
Q6P444;E9PN39	Q6P444;E9PN39	Mitochondrial fission regulator 2	MTFR2	sp|Q6P444|MTFR2_HUMAN Mitochondrial fission regulator 2 OS=Homo sapiens (Human) OX=9606 GN=MTFR2 PE=1 SV=2;tr|E9PN39|E9PN39_HUMAN Isoform of Q6P444, Mitochondrial fission regulator 2 (Fragment) OS=Homo sapiens (Human) OX=9606 GN=MTFR2 PE=1 SV=1	114730	63354	108740	71303	108800	74833	108430	66830	108370	74765	108350	73048	2	16.8301	16.035	16.7707	16.1374	16.6389	16.1217	-0.648533	4.97881	3.85099	16.4223	-10.3604	3.78377				keep	4		down	13.5	4	4	13.5	13.5	43.384	0	24.233	83089000	4	385	4	4
Q5JTH9;Q5JTH9-2;Q5JTH9-3;A0A087X1U8;H7C1M8;A0A087WYW2;A0A087X0G0	Q5JTH9;Q5JTH9-2;Q5JTH9-3	RRP12-like protein	RRP12	sp|Q5JTH9|RRP12_HUMAN RRP12-like protein OS=Homo sapiens (Human) OX=9606 GN=RRP12 PE=1 SV=2;sp|Q5JTH9-2|RRP12-2_HUMAN Isoform of Q5JTH9, Isoform 2 of RRP12-like protein OS=Homo sapiens (Human) OX=9606 GN=RRP12 PE=1 SV=2;sp|Q5JTH9-3|RRP12-3_HUMAN Isoform of	6121900	3818600	6373100	3848900	5977100	3953600	5787700	3980700	6352800	4058400	5944500	3864700	7	22.5678	21.9485	22.6437	21.8917	22.4186	21.8451	-0.648267	4.77211	3.70896	22.2192	-9.68065	3.2634				keep	35		down	36.2	35	35	36.2	36.2	143.7	0	210.69	6296600000	48	1297	46	46
Q4KWH8;A0A2U3TZV8;Q4KWH8-3;Q4KWH8-4;O75038;O75038-2;B9DI82;O75038-4;O75038-3	Q4KWH8;A0A2U3TZV8;Q4KWH8-3;Q4KWH8-4	1-phosphatidylinositol 4,5-bisphosphate phosphodiesterase eta-1	PLCH1	sp|Q4KWH8|PLCH1_HUMAN 1-phosphatidylinositol 4,5-bisphosphate phosphodiesterase eta-1 OS=Homo sapiens (Human) OX=9606 GN=PLCH1 PE=1 SV=1;tr|A0A2U3TZV8|A0A2U3TZV8_HUMAN Isoform of Q4KWH8, Phosphoinositide phospholipase C OS=Homo sapiens (Human) OX=9606 GN=P	539630	346640	582840	340040	593960	396170	510230	360470	580630	361190	589180	387150	9	19.0638	18.487	19.1929	18.3911	19.0876	18.5261	-0.6467	5.20066	3.99503	18.7914	-11.1375	4.34121				keep	14		down	12.3	14	1	12.3	1.1	189.22	0	31.458	254660000	14	1693	14	14
Q9P2Y4	Q9P2Y4	Zinc finger protein 219	ZNF219	sp|Q9P2Y4|ZN219_HUMAN Zinc finger protein 219 OS=Homo sapiens (Human) OX=9606 GN=ZNF219 PE=1 SV=2	38256	25894	38069	24420	45249	26126	36178	26752	38164	25853	44705	25675	1	15.2456	14.7442	15.2565	14.5915	15.3732	14.6036	-0.645333	4.9914	3.86002	14.9691	-10.4064	3.81786				keep	4		down	10.5	4	4	10.5	10.5	76.876	0	23.433	53755000	5	722	4	4
Q7LFL8;D6RDY2;D6RBE0;E7EVI8;Q7LFL8-2;D6R966;D6RHG9;D6RHC6;D6RIR8;D6R9V1;E7EV55	Q7LFL8;D6RDY2;D6RBE0;E7EVI8;Q7LFL8-2	CXXC-type zinc finger protein 5	CXXC5	sp|Q7LFL8|CXXC5_HUMAN CXXC-type zinc finger protein 5 OS=Homo sapiens (Human) OX=9606 GN=CXXC5 PE=1 SV=1;tr|D6RDY2|D6RDY2_HUMAN Isoform of Q7LFL8, CXXC-type zinc finger protein 5 (Fragment) OS=Homo sapiens (Human) OX=9606 GN=CXXC5 PE=1 SV=1;tr|D6RBE0|D6RBE	94105	57634	84797	52428	91636	60676	88963	60059	84973	55487	90884	59310	11	16.5442	15.8985	16.4119	15.6938	16.3912	15.8192	-0.645267	4.65561	3.62064	16.1265	-9.31835	2.97236				keep	3		down	9.3	3	3	9.3	9.3	32.977	0	4.6416	11429000	3	322	3	3
Q8IXL7;Q8IXL7-2;H7C2B7;F5H7C4;F5H6G9;F5H199;H0YFW5	Q8IXL7;Q8IXL7-2;H7C2B7;F5H7C4;F5H6G9;F5H199;H0YFW5	Methionine-R-sulfoxide reductase B3	MSRB3	sp|Q8IXL7|MSRB3_HUMAN Methionine-R-sulfoxide reductase B3 OS=Homo sapiens (Human) OX=9606 GN=MSRB3 PE=1 SV=2;sp|Q8IXL7-2|MSRB3-2_HUMAN Isoform of Q8IXL7, Isoform 2 of Methionine-R-sulfoxide reductase B3 OS=Homo sapiens (Human) OX=9606 GN=MSRB3 PE=1 SV=2;tr	107250	48489	95345	46327	39660	45308	101310	52394	94321	48730	40824	43605	7	16.7328	15.6493	16.581	15.5153	15.183	15.3978	-0.6448	0.923635	0.765421	15.8432	-1.75874	-6.21551				keep	2			25	2	2	25	25	20.702	0	4.9031	40645000	2	192	2	2
Q5SWX8;Q5SWX8-3;Q5SWX8-4;Q5SWX8-2	Q5SWX8;Q5SWX8-3;Q5SWX8-4;Q5SWX8-2	Protein odr-4 homolog	ODR4	sp|Q5SWX8|ODR4_HUMAN Protein odr-4 homolog OS=Homo sapiens (Human) OX=9606 GN=ODR4 PE=1 SV=1;sp|Q5SWX8-3|ODR4-3_HUMAN Isoform of Q5SWX8, Isoform 3 of Protein odr-4 homolog OS=Homo sapiens (Human) OX=9606 GN=ODR4 PE=1 SV=1;sp|Q5SWX8-4|ODR4-4_HUMAN Isoform o	956300	521090	941770	628330	905870	625910	903750	550910	937030	656720	903480	610870	4	19.8893	19.0751	19.8852	19.2769	19.6965	19.186	-0.644333	4.40561	3.43763	19.5015	-8.57187	2.33975				keep	16		down	37.7	16	16	37.7	37.7	51.103	0	73.26	713980000	14	454	13	13
Q96MV1;S4R434;S4R3V7;C9J6J2;C9JJM2	Q96MV1;S4R434;S4R3V7;C9J6J2;C9JJM2	Transmembrane protein 56	TMEM56;TMEM56-RWDD3	sp|Q96MV1|TLCD4_HUMAN TLC domain-containing protein 4 OS=Homo sapiens (Human) OX=9606 GN=TLCD4 PE=1 SV=1;tr|S4R434|S4R434_HUMAN TLCD4-RWDD3 readthrough, TLC domain-containing protein OS=Homo sapiens (Human) OX=9606 GN=TLCD4-RWDD3 PE=4 SV=1;tr|S4R3V7|S4R3V7	150220	77537	152740	105110	145840	103180	141950	82562	151590	109520	145680	100620	5	17.219	16.3265	17.2609	16.6973	17.0616	16.5852	-0.644167	3.56563	2.82284	16.8584	-6.41755	0.217195				keep	2		down	9.1	2	2	9.1	9.1	30.04	0.00012824	3.9422	68453000	3	263	3	3
Q9Y2H6;Q9Y2H6-2;G5E9X3;A0A087X1M6;H7C507	Q9Y2H6;Q9Y2H6-2	Fibronectin type-III domain-containing protein 3A	FNDC3A	sp|Q9Y2H6|FND3A_HUMAN Fibronectin type-III domain-containing protein 3A OS=Homo sapiens (Human) OX=9606 GN=FNDC3A PE=1 SV=4;sp|Q9Y2H6-2|FND3A-2_HUMAN Isoform of Q9Y2H6, Isoform 2 of Fibronectin type-III domain-containing protein 3A OS=Homo sapiens (Human)	1296300	776630	1277300	833770	1365400	882550	1225400	812330	1275000	876980	1355600	863450	5	20.3282	19.6508	20.3248	19.685	20.2885	19.6817	-0.641333	6.13668	4.57187	19.9932	-15.0249	6.65772				keep	26		down	32.1	26	26	32.1	32.1	131.85	0	133.16	1443200000	32	1198	26	26
Q9NUJ7	Q9NUJ7	PI-PLC X domain-containing protein 1	PLCXD1	sp|Q9NUJ7|PLCX1_HUMAN PI-PLC X domain-containing protein 1 OS=Homo sapiens (Human) OX=9606 GN=PLCXD1 PE=2 SV=1	72756	52791	81515	46383	84183	51942	68819	54280	81456	49428	83308	50909	1	16.173	15.7719	16.3549	15.517	16.2688	15.595	-0.6376	4.24033	3.3179	15.9468	-8.1088	1.9231				keep	2		down	7.7	2	2	7.7	7.7	36.668	0	9.2205	100060000	2	323	2	2
Q99959-2;Q99959;A0A087WXY2	Q99959-2;Q99959	Plakophilin-2	PKP2	sp|Q99959-2|PKP2-2_HUMAN Isoform of Q99959, Isoform 1 of Plakophilin-2 OS=Homo sapiens (Human) OX=9606 GN=PKP2 PE=1 SV=2;sp|Q99959|PKP2_HUMAN Plakophilin-2 OS=Homo sapiens (Human) OX=9606 GN=PKP2 PE=1 SV=2	858880	531890	863790	537870	864550	572050	811980	554570	862200	566910	859120	559170	3	19.7343	19.1047	19.7605	19.0526	19.6292	19.0561	-0.636867	5.50724	4.18776	19.3896	-12.2954	5.10636				keep	16		down	24.4	16	16	24.4	24.4	92.755	0	46.843	557610000	15	837	12	12
Q12873;Q12873-3;Q12873-2;A0A5F9ZHX5;H7C2H0;I3L229;K7EPV1;A0A5F9ZHM2	Q12873;Q12873-3;Q12873-2;A0A5F9ZHX5	Chromodomain-helicase-DNA-binding protein 3	CHD3	sp|Q12873|CHD3_HUMAN Chromodomain-helicase-DNA-binding protein 3 OS=Homo sapiens (Human) OX=9606 GN=CHD3 PE=1 SV=3;sp|Q12873-3|CHD3-3_HUMAN Isoform of Q12873, Isoform 3 of Chromodomain-helicase-DNA-binding protein 3 OS=Homo sapiens (Human) OX=9606 GN=CHD3	2628900	1569900	2627800	1692800	2759000	1835400	2485100	1643000	2620900	1781700	2741000	1793800	8	21.3482	20.6661	21.3656	20.7067	21.3033	20.738	-0.635433	5.89279	4.42136	21.0213	-13.907	6.06029				keep	30		down	21	39	27	26.2	18.9	226.59	0	118.25	1440500000	39	2000	35	35
Q9NQW7-3;Q9NQW7;Q9NQW7-4;Q5T6H7;Q9NQW7-2;Q5T6H2;Q5T6H3	Q9NQW7-3;Q9NQW7;Q9NQW7-4;Q5T6H7;Q9NQW7-2	Xaa-Pro aminopeptidase 1	XPNPEP1	sp|Q9NQW7-3|XPP1-3_HUMAN Isoform of Q9NQW7, Isoform 3 of Xaa-Pro aminopeptidase 1 OS=Homo sapiens (Human) OX=9606 GN=XPNPEP1 PE=1 SV=3;sp|Q9NQW7|XPP1_HUMAN Xaa-Pro aminopeptidase 1 OS=Homo sapiens (Human) OX=9606 GN=XPNPEP1 PE=1 SV=3;sp|Q9NQW7-4|XPP1-4_HUM	3024200	1887500	3278700	2136500	3839300	2419700	2859200	1968800	3265900	2256800	3801800	2369500	7	21.5504	20.9319	21.6849	21.0425	21.78	21.1368	-0.6347	4.29243	3.36069	21.3544	-8.25353	2.05543				keep	22		down	47	22	22	47	47	74.797	0	96.226	2184300000	26	666	21	21
O94955;D6R935;D6RG10;H0Y9A8	O94955;D6R935	Rho-related BTB domain-containing protein 3	RHOBTB3	sp|O94955|RHBT3_HUMAN Rho-related BTB domain-containing protein 3 OS=Homo sapiens (Human) OX=9606 GN=RHOBTB3 PE=1 SV=2;tr|D6R935|D6R935_HUMAN Isoform of O94955, Rho-related BTB domain-containing protein 3 (Fragment) OS=Homo sapiens (Human) OX=9606 GN=RHOBT	56725	31265	51405	34256	53706	37526	53609	32963	51322	35927	53461	36611	4	15.8139	15.0162	15.6898	15.0798	15.6204	15.126	-0.634033	4.90658	3.80029	15.391	-10.1215	3.60457				keep	5		down	12.9	5	5	12.9	12.9	69.413	0	14.55	327430000	7	611	3	3
Q9Y320;Q9Y320-2;E9PSF0;E9PRL5;H3BSU7;E9PLR1;G3V155	Q9Y320;Q9Y320-2	Thioredoxin-related transmembrane protein 2	TMX2	sp|Q9Y320|TMX2_HUMAN Thioredoxin-related transmembrane protein 2 OS=Homo sapiens (Human) OX=9606 GN=TMX2 PE=1 SV=1;sp|Q9Y320-2|TMX2-2_HUMAN Isoform of Q9Y320, Isoform 2 of Thioredoxin-related transmembrane protein 2 OS=Homo sapiens (Human) OX=9606 GN=TMX2	2181300	1305900	2141600	1427700	2316300	1491900	2062000	1366000	2138400	1499200	2300000	1459800	7	21.079	20.4005	21.0704	20.461	21.051	20.4391	-0.633267	6.05061	4.52871	20.7502	-14.6205	6.44709				keep	10		down	34.8	10	10	34.8	34.8	34.037	0	29.284	2680700000	17	296	17	17
P51828;I3L3Q5;H3BMA5;F5H699;H3BQ93;F5H4D1	P51828;I3L3Q5;H3BMA5;F5H699;H3BQ93;F5H4D1	Adenylate cyclase type 7	ADCY7	sp|P51828|ADCY7_HUMAN Adenylate cyclase type 7 OS=Homo sapiens (Human) OX=9606 GN=ADCY7 PE=1 SV=1;tr|I3L3Q5|I3L3Q5_HUMAN Isoform of P51828, Adenylate cyclase type 7 (Fragment) OS=Homo sapiens (Human) OX=9606 GN=ADCY7 PE=1 SV=1;tr|H3BMA5|H3BMA5_HUMAN Isofor	38131	25320	39302	24114	42742	26975	36057	26222	39294	25547	42338	26415	6	15.2409	14.7119	15.3025	14.5733	15.2909	14.6497	-0.633133	5.46725	4.16368	14.9615	-12.1375	5.00623				keep	2		down	3.1	2	1	3.1	1.7	120.31	0	9.7637	18693000	2	1080	2	2
O60911	O60911	Cathepsin L2	CTSV	sp|O60911|CATL2_HUMAN Cathepsin L2 OS=Homo sapiens (Human) OX=9606 GN=CTSV PE=1 SV=2	84339	44470	76731	57372	81484	53338	79698	47134	76570	59554	81214	52159	1	16.3861	15.5244	16.2677	15.8238	16.2218	15.6332	-0.6314	4.02091	3.16254	15.9762	-7.52518	1.36894				keep	4		down	19.2	4	4	19.2	19.2	37.329	0	12.444	87016000	3	334	3	3
Q9NUU6	Q9NUU6	Inactive ubiquitin thioesterase FAM105A	FAM105A	sp|Q9NUU6|OTULL_HUMAN Inactive ubiquitin thioesterase OTULINL OS=Homo sapiens (Human) OX=9606 GN=OTULINL PE=1 SV=1	37034	21836	36952	24980	39842	25797	35007	22884	36859	26192	39582	25237	1	15.1988	14.4983	15.2135	14.6242	15.1896	14.5853	-0.631367	5.63078	4.27327	14.885	-12.7869	5.40996				keep	2		down	12.4	2	2	12.4	12.4	42.195	0	14.539	56359000	2	356	2	2
Q92729;Q92729-3;Q92729-2;Q92729-4	Q92729;Q92729-3;Q92729-2;Q92729-4	Receptor-type tyrosine-protein phosphatase U	PTPRU	sp|Q92729|PTPRU_HUMAN Receptor-type tyrosine-protein phosphatase U OS=Homo sapiens (Human) OX=9606 GN=PTPRU PE=1 SV=2;sp|Q92729-3|PTPRU-3_HUMAN Isoform of Q92729, Isoform 3 of Receptor-type tyrosine-protein phosphatase U OS=Homo sapiens (Human) OX=9606 GN=	731670	448930	737130	453910	744930	508950	691690	468550	735380	479200	740360	496930	4	19.5031	18.86	19.5317	18.8078	19.4143	18.8875	-0.631267	5.51004	4.1891	19.1674	-12.3064	5.11325				keep	21		down	21	21	21	21	21	162.42	0	105.79	513800000	21	1446	20	20
Q8IWB1;X6RK76	Q8IWB1;X6RK76	Inositol 1,4,5-trisphosphate receptor-interacting protein	ITPRIP	sp|Q8IWB1|IPRI_HUMAN Inositol 1,4,5-trisphosphate receptor-interacting protein OS=Homo sapiens (Human) OX=9606 GN=ITPRIP PE=1 SV=1;tr|X6RK76|X6RK76_HUMAN Isoform of Q8IWB1, Inositol 1,4,5-trisphosphate receptor-interacting protein (Fragment) OS=Homo sapien	98396	58204	96448	65763	100810	64567	93010	60960	96288	68807	100230	63191	2	16.6085	15.9127	16.5976	16.0207	16.5289	15.9089	-0.6309	5.45593	4.15552	16.2629	-12.0942	4.97855				keep	4		down	6.9	4	4	6.9	6.9	62.059	0.000125	3.5008	24101000	3	547	3	3
Q9NVH0;Q9NVH0-2;C9JLF4	Q9NVH0;Q9NVH0-2	Exonuclease 3-5 domain-containing protein 2	EXD2	sp|Q9NVH0|EXD2_HUMAN Exonuclease 3-5 domain-containing protein 2 OS=Homo sapiens (Human) OX=9606 GN=EXD2 PE=1 SV=2;sp|Q9NVH0-2|EXD2-2_HUMAN Isoform of Q9NVH0, Isoform 2 of Exonuclease 3-5 domain-containing protein 2 OS=Homo sapiens (Human) OX=9606 GN=E	542480	335540	544080	338110	565640	380160	512850	349880	543100	357040	561720	371390	3	19.0714	18.44	19.0936	18.3829	19.0171	18.4666	-0.630867	5.73755	4.33442	18.7453	-13.2303	5.67405				keep	13		down	29	13	13	29	29	70.352	0	61.601	350490000	14	621	10	10
P45973;F8VNY3	P45973	Chromobox protein homolog 5	CBX5	sp|P45973|CBX5_HUMAN Chromobox protein homolog 5 OS=Homo sapiens (Human) OX=9606 GN=CBX5 PE=1 SV=1	2650300	1454300	2432800	1559000	2298000	1688500	2504700	1534400	2426300	1634900	2293600	1644500	2	21.3599	20.5558	21.2544	20.5879	21.0395	20.6177	-0.6308	4.1152	3.22978	20.9025	-7.77116	1.60663				keep	10		down	61.8	10	9	61.8	55.5	22.225	0	47.095	5291700000	49	191	48	48
Q9UJQ4;Q9UJQ4-2;Q6Y8G5	Q9UJQ4;Q9UJQ4-2	Sal-like protein 4	SALL4	sp|Q9UJQ4|SALL4_HUMAN Sal-like protein 4 OS=Homo sapiens (Human) OX=9606 GN=SALL4 PE=1 SV=1;sp|Q9UJQ4-2|SALL4-2_HUMAN Isoform of Q9UJQ4, Isoform SALL4B of Sal-like protein 4 OS=Homo sapiens (Human) OX=9606 GN=SALL4 PE=1 SV=1	1654500	976140	1568400	968430	1533400	1088800	1564000	1022100	1566000	1020600	1526500	1061600	3	20.6802	19.9806	20.621	19.901	20.4559	19.9847	-0.630267	4.69037	3.64568	20.2706	-9.42273	3.05724				keep	20		down	30.8	20	19	30.8	29.8	112.23	0	56.355	1148700000	23	1053	20	20
P00367;P00367-3;P00367-2;CON__sp|P00366|DHE3_BOVIN	P00367;P00367-3;P00367-2;CON__sp|P00366|DHE3_BOVIN	Glutamate dehydrogenase 1, mitochondrial	GLUD1	sp|P00367|DHE3_HUMAN Glutamate dehydrogenase 1, mitochondrial OS=Homo sapiens (Human) OX=9606 GN=GLUD1 PE=1 SV=2;sp|P00367-3|DHE3-3_HUMAN Isoform of P00367, Isoform 3 of Glutamate dehydrogenase 1, mitochondrial OS=Homo sapiens (Human) OX=9606 GN=GLUD1 PE=1	2775200	1735100	2619300	1622300	2646600	1771700	2623800	1805500	2622000	1711600	2629700	1731100	4	21.4264	20.8105	21.3609	20.6453	21.2433	20.6871	-0.629233	4.66959	3.63091	21.0289	-9.36147	3.00752			+	keep	20		down	42.1	20	9	42.1	19.2	61.397	0	68.38	11345000000	44	558	40	40
Q9NX40;Q9NX40-4;Q9NX40-3;Q9NX40-2;D6RIT9;D6RG39;D6R918;D6RBN5;D6RDK6;D6RC55;D6RA54;D6RDI5;D6RBC5;D6RF07;D6RDK1;D6R9T5;D6RIV2;D6RI08	Q9NX40;Q9NX40-4;Q9NX40-3;Q9NX40-2;D6RIT9;D6RG39;D6R918;D6RBN5;D6RDK6;D6RC55;D6RA54;D6RDI5;D6RBC5	OCIA domain-containing protein 1	OCIAD1	sp|Q9NX40|OCAD1_HUMAN OCIA domain-containing protein 1 OS=Homo sapiens (Human) OX=9606 GN=OCIAD1 PE=1 SV=1;sp|Q9NX40-4|OCAD1-4_HUMAN Isoform of Q9NX40, Isoform 4 of OCIA domain-containing protein 1 OS=Homo sapiens (Human) OX=9606 GN=OCIAD1 PE=1 SV=1;sp|Q9N	1143700	625490	1099600	622910	830470	695190	1080900	660720	1093300	656010	833750	674320	18	20.1475	19.3385	20.1087	19.2644	19.5711	19.3374	-0.629	2.56974	2.08683	19.6279	-4.39645	-2.28746				keep	8		down	36.7	8	8	36.7	36.7	27.626	0	49.283	3297900000	13	245	12	12
Q9ULJ6;A0A087WYE6;F6WR09;Q9ULJ6-2	Q9ULJ6;A0A087WYE6	Zinc finger MIZ domain-containing protein 1	ZMIZ1	sp|Q9ULJ6|ZMIZ1_HUMAN Zinc finger MIZ domain-containing protein 1 OS=Homo sapiens (Human) OX=9606 GN=ZMIZ1 PE=1 SV=3;tr|A0A087WYE6|A0A087WYE6_HUMAN Isoform of Q9ULJ6, Zmiz1_N domain-containing protein OS=Homo sapiens (Human) OX=9606 GN=ZMIZ1 PE=1 SV=1	241600	146290	269520	183930	332110	208830	228390	153170	268060	193820	328810	204530	4	17.9045	17.2424	18.0802	17.5045	18.2489	17.6023	-0.628133	3.13533	2.50427	17.7638	-5.48466	-0.868906				keep	7		down	10.4	7	6	10.4	9.6	115.48	0	12.143	303520000	6	1067	6	6
H0YNH8;Q9BZF9-2;Q9BZF9;F5H2B9;H0YN48;H0YMI1	H0YNH8;Q9BZF9-2;Q9BZF9;F5H2B9	Uveal autoantigen with coiled-coil domains and ankyrin repeats	UACA	tr|H0YNH8|H0YNH8_HUMAN Isoform of Q9BZF9, Uveal autoantigen with coiled-coil domains and ankyrin repeats OS=Homo sapiens (Human) OX=9606 GN=UACA PE=1 SV=1;sp|Q9BZF9-2|UACA-2_HUMAN Isoform of Q9BZF9, Isoform 2 of Uveal autoantigen with coiled-coil domains a	1525500	919550	1507700	974810	1597600	1065200	1442100	961240	1505000	1026000	1587100	1040900	6	20.5631	19.8945	20.5641	19.9105	20.5151	19.9531	-0.628067	5.9431	4.45842	20.2334	-14.1313	6.18406				keep	26		down	21.7	26	26	21.7	21.7	161.31	0	57.198	913930000	29	1401	27	27
Q05682-3;E7EX44;Q05682-6;Q05682-2;Q05682;C9JEK3	Q05682-3;E7EX44;Q05682-6;Q05682-2;Q05682	Caldesmon	CALD1	sp|Q05682-3|CALD1-3_HUMAN Isoform of Q05682, Isoform 3 of Caldesmon OS=Homo sapiens (Human) OX=9606 GN=CALD1 PE=1 SV=3;tr|E7EX44|E7EX44_HUMAN Isoform of Q05682, Caldesmon OS=Homo sapiens (Human) OX=9606 GN=CALD1 PE=1 SV=1;sp|Q05682-6|CALD1-6_HUMAN Isoform	3637800	2318300	3589100	2280700	3876000	2487400	3439500	2409200	3590000	2406600	3844300	2434200	6	21.8169	21.2285	21.8154	21.1368	21.7937	21.1766	-0.628033	5.86328	4.4045	21.4946	-13.7744	5.98616				keep	26		down	47.1	26	2	47.1	2.2	64.255	0	154.34	5443800000	34	558	31	31
Q96JQ0	Q96JQ0	Protocadherin-16	DCHS1	sp|Q96JQ0|PCD16_HUMAN Protocadherin-16 OS=Homo sapiens (Human) OX=9606 GN=DCHS1 PE=1 SV=1	194580	112140	174970	111400	165720	117530	183910	117560	174960	116860	165240	114600	1	17.5922	16.8588	17.4569	16.7811	17.246	16.773	-0.6274	3.91266	3.0806	17.118	-7.24926	1.09485				keep	11		down	5	11	11	5	5	346.18	0	23.903	93041000	12	3298	10	9
Q9UKE5;Q9UKE5-8;Q9UKE5-5;Q9UKE5-7;Q9UKE5-3;Q9UKE5-6;Q9UKE5-2;Q9UKE5-4;C9J338	Q9UKE5;Q9UKE5-8;Q9UKE5-5;Q9UKE5-7;Q9UKE5-3;Q9UKE5-6;Q9UKE5-2;Q9UKE5-4	TRAF2 and NCK-interacting protein kinase	TNIK	sp|Q9UKE5|TNIK_HUMAN TRAF2 and NCK-interacting protein kinase OS=Homo sapiens (Human) OX=9606 GN=TNIK PE=1 SV=1;sp|Q9UKE5-8|TNIK-8_HUMAN Isoform of Q9UKE5, Isoform 8 of TRAF2 and NCK-interacting protein kinase OS=Homo sapiens (Human) OX=9606 GN=TNIK PE=1 S	125220	74039	124920	78217	128920	90672	118360	77570	124520	82510	128200	88439	9	16.9563	16.2599	16.9708	16.2709	16.8837	16.3987	-0.6271	5.22548	4.01502	16.6234	-11.2272	4.40318				keep	4		down	3.8	9	4	8.3	3.8	154.94	0	19.796	56909000	4	1360	4	4
Q96EF6;M0QYV7;M0QYI3	Q96EF6;M0QYV7	F-box only protein 17	FBXO17	sp|Q96EF6|FBX17_HUMAN F-box only protein 17 OS=Homo sapiens (Human) OX=9606 GN=FBXO17 PE=1 SV=1;tr|M0QYV7|M0QYV7_HUMAN Isoform of Q96EF6, F-box only protein 17 OS=Homo sapiens (Human) OX=9606 GN=FBXO17 PE=1 SV=1	61934	36801	59925	41586	70494	44514	58544	38516	59878	43655	69898	43589	3	15.9407	15.2514	15.911	15.3595	16.0128	15.3723	-0.6271	5.31426	4.06803	15.6413	-11.5547	4.62543				keep	3		down	16.5	5	3	23.4	16.5	31.479	0	7.2492	42795000	3	278	3	3
O60513;E7ETS9;C9J3R8;C9J5S0;C9J4S5;C9JA31	O60513;E7ETS9;C9J3R8;C9J5S0;C9J4S5	Beta-1,4-galactosyltransferase 4;N-acetyllactosamine synthase;Lactotriaosylceramide beta-1,4-galactosyltransferase	B4GALT4	sp|O60513|B4GT4_HUMAN Beta-1,4-galactosyltransferase 4 OS=Homo sapiens (Human) OX=9606 GN=B4GALT4 PE=1 SV=1;tr|E7ETS9|E7ETS9_HUMAN Isoform of O60513, Glyco_transf_7N domain-containing protein OS=Homo sapiens (Human) OX=9606 GN=B4GALT4 PE=1 SV=1;tr|C9J3R8|C	123640	71477	118280	83257	132370	84786	116870	75020	118130	87089	131490	82979	6	16.938	16.2091	16.892	16.361	16.9218	16.3019	-0.6266	5.383	4.10902	16.604	-11.8142	4.79727				keep	4		down	15.7	4	4	15.7	15.7	40.041	0	21.206	60095000	5	344	4	4
P51649;P51649-2;C9J8Q5;A0A5F9ZI23;A0A5F9ZH05;A0A5F9ZH98	P51649;P51649-2;C9J8Q5;A0A5F9ZI23	Succinate-semialdehyde dehydrogenase, mitochondrial	ALDH5A1	sp|P51649|SSDH_HUMAN Succinate-semialdehyde dehydrogenase, mitochondrial OS=Homo sapiens (Human) OX=9606 GN=ALDH5A1 PE=1 SV=2;sp|P51649-2|SSDH-2_HUMAN Isoform of P51649, Isoform 2 of Succinate-semialdehyde dehydrogenase, mitochondrial OS=Homo sapiens (Huma	403360	255110	373510	239910	397950	256100	381360	265070	374510	252720	394930	250590	6	18.6439	18.0446	18.551	17.8879	18.5098	17.8967	-0.625167	4.87615	3.77763	18.2556	-10.0209	3.52789				keep	7		down	16.3	7	7	16.3	16.3	57.214	0	18.316	477920000	7	535	6	6
Q9BQP7;Q5QPE7;Q5QPE8	Q9BQP7;Q5QPE7;Q5QPE8	Mitochondrial genome maintenance exonuclease 1	MGME1	sp|Q9BQP7|MGME1_HUMAN Mitochondrial genome maintenance exonuclease 1 OS=Homo sapiens (Human) OX=9606 GN=MGME1 PE=1 SV=1;tr|Q5QPE7|Q5QPE7_HUMAN Isoform of Q9BQP7, Mitochondrial genome maintenance exonuclease 1 OS=Homo sapiens (Human) OX=9606 GN=MGME1 PE=1 S	1128100	661190	1063200	633130	960910	720210	1066300	692750	1061200	667740	958780	700980	3	20.1277	19.4186	20.0602	19.2879	19.7816	19.3884	-0.624867	3.72021	2.93799	19.6774	-6.77861	0.608049				keep	10		down	38.4	10	10	38.4	38.4	39.42	0	33.27	822680000	13	344	12	12
Q9BV81	Q9BV81	ER membrane protein complex subunit 6	EMC6	sp|Q9BV81|EMC6_HUMAN ER membrane protein complex subunit 6 OS=Homo sapiens (Human) OX=9606 GN=EMC6 PE=1 SV=1	827580	510450	786250	566470	986040	580570	782390	531960	787680	594090	975850	570090	1	19.6808	19.0453	19.6248	19.1274	19.8189	19.0775	-0.624767	4.92812	3.81589	19.3958	-10.1975	3.662				keep	2		down	20	2	2	20	20	12.017	0	4.3804	718660000	2	110	2	2
Q9GZP1	Q9GZP1	Neurensin-2	NRSN2	sp|Q9GZP1|NRSN2_HUMAN Neurensin-2 OS=Homo sapiens (Human) OX=9606 GN=NRSN2 PE=2 SV=1	26541	16456	26903	16028	26429	18725	25092	17158	26835	16960	26284	18259	1	14.7182	14.0902	14.7556	13.984	14.5974	14.123	-0.624667	4.89963	3.7944	14.3781	-10.0949	3.58435				keep	2		down	26.5	2	2	26.5	26.5	21.983	0	25.668	57336000	4	204	4	4
Q96GS4	Q96GS4	Uncharacterized protein C17orf59	C17orf59	sp|Q96GS4|BORC6_HUMAN BLOC-1-related complex subunit 6 OS=Homo sapiens (Human) OX=9606 GN=BORCS6 PE=1 SV=2	166770	110300	167070	99401	183800	122360	157700	114220	167160	105730	182090	119580	1	17.3697	16.835	17.3903	16.6167	17.3954	16.8311	-0.6242	4.65758	3.62064	17.073	-9.32226	2.97555				keep	7		down	32.8	7	7	32.8	32.8	37.226	0	15.407	140350000	7	357	7	7
Q7Z7F7;Q7Z7F7-2;X6R631;X6RIW1	Q7Z7F7;Q7Z7F7-2;X6R631;X6RIW1	39S ribosomal protein L55, mitochondrial	MRPL55	sp|Q7Z7F7|RM55_HUMAN 39S ribosomal protein L55, mitochondrial OS=Homo sapiens (Human) OX=9606 GN=MRPL55 PE=1 SV=1;sp|Q7Z7F7-2|RM55-2_HUMAN Isoform of Q7Z7F7, Isoform 2 of 39S ribosomal protein L55, mitochondrial OS=Homo sapiens (Human) OX=9606 GN=MRPL55 PE	591820	315180	545840	306780	376720	329990	559260	333740	542990	322370	379590	319670	4	19.197	18.3497	19.0983	18.2426	18.4307	18.2624	-0.623767	2.00089	1.6457	18.5968	-3.42424	-3.69376				keep	4		down	36.7	4	4	36.7	36.7	15.128	0	18.599	156630000	4	128	4	4
P55285;D6RF86;P55285-2	P55285;D6RF86;P55285-2	Cadherin-6	CDH6	sp|P55285|CADH6_HUMAN Cadherin-6 OS=Homo sapiens (Human) OX=9606 GN=CDH6 PE=1 SV=1;tr|D6RF86|D6RF86_HUMAN Isoform of P55285, Cadherin-6 OS=Homo sapiens (Human) OX=9606 GN=CDH6 PE=1 SV=1;sp|P55285-2|CADH6-2_HUMAN Isoform of P55285, Isoform 2 of Cadherin-6 O	883370	528090	829590	544820	860160	576680	835040	552010	829600	572000	855360	563440	3	19.7749	19.0943	19.7022	19.0711	19.6218	19.0678	-0.6219	5.39362	4.11238	19.3887	-11.8516	4.82167				keep	13		down	20.3	13	9	20.3	14.9	88.308	0	165.08	1087500000	16	790	16	15
Q9P2D0;E7EPI0;Q9P2D0-2;E9PDR5;D6R9F4;H0Y9N7;Q9P2D0-3	Q9P2D0;E7EPI0;Q9P2D0-2;E9PDR5	Inhibitor of Bruton tyrosine kinase	IBTK	sp|Q9P2D0|IBTK_HUMAN Inhibitor of Bruton tyrosine kinase OS=Homo sapiens (Human) OX=9606 GN=IBTK PE=1 SV=3;tr|E7EPI0|E7EPI0_HUMAN Isoform of Q9P2D0, Inhibitor of Bruton tyrosine kinase OS=Homo sapiens (Human) OX=9606 GN=IBTK PE=1 SV=1;sp|Q9P2D0-2|IBTK-2_HU	382960	273780	400180	231950	422580	269060	362220	281590	400880	246940	418400	263380	7	18.5691	18.1465	18.6505	17.8392	18.5964	17.9679	-0.6208	4.15304	3.25838	18.2949	-7.8732	1.70345				keep	10		down	9.3	10	10	9.3	9.3	150.53	0	22.868	171700000	11	1353	10	10
P32121;P32121-3;P32121-4;P32121-5;P32121-2;I3L412;K7ENA6;Q68DZ5;K7EL17	P32121;P32121-3;P32121-4;P32121-5;P32121-2;I3L412;K7ENA6	Beta-arrestin-2	ARRB2	sp|P32121|ARRB2_HUMAN Beta-arrestin-2 OS=Homo sapiens (Human) OX=9606 GN=ARRB2 PE=1 SV=2;sp|P32121-3|ARRB2-3_HUMAN Isoform of P32121, Isoform 2 of Beta-arrestin-2 OS=Homo sapiens (Human) OX=9606 GN=ARRB2 PE=1 SV=2;sp|P32121-4|ARRB2-4_HUMAN Isoform of P3212	1426600	971520	1445300	917240	1669100	1019400	1349100	1003400	1448000	970900	1651300	999530	9	20.4664	19.9738	20.5031	19.8227	20.5782	19.8897	-0.6205	5.11976	3.9414	20.2056	-10.8495	4.139				keep	13		down	43.5	13	13	43.5	43.5	46.105	0	28.09	956800000	14	409	12	12
Q13555;Q13555-6;Q13555-2;A0A2Q3DQE3;Q13555-4;Q13555-11;Q13555-8;Q13555-5;Q13555-9;Q13555-10;Q5SWX3;Q13555-3;Q13555-7;Q8WU40;H0Y6G2;H7BXS4	Q13555;Q13555-6;Q13555-2;A0A2Q3DQE3;Q13555-4;Q13555-11;Q13555-8;Q13555-5;Q13555-9;Q13555-10;Q5SWX3;Q13555-3;Q13555-7;Q8WU40;H0Y6G2	Calcium/calmodulin-dependent protein kinase type II subunit gamma	CAMK2G	sp|Q13555|KCC2G_HUMAN Calcium/calmodulin-dependent protein kinase type II subunit gamma OS=Homo sapiens (Human) OX=9606 GN=CAMK2G PE=1 SV=4;sp|Q13555-6|KCC2G-6_HUMAN Isoform of Q13555, Isoform 6 of Calcium/calmodulin-dependent protein kinase type II subuni	332720	224690	359610	239470	419600	246350	314640	232490	359400	252310	415190	241930	16	18.3662	17.8615	18.4962	17.8852	18.5862	17.8407	-0.6204	4.83565	3.75024	18.1727	-9.88596	3.42401				keep	6		down	15.6	8	5	21.1	13.3	62.606	0	10.324	233050000	7	558	6	6
Q96ER9;Q96ER9-2;C9JSW8;C9JPZ8	Q96ER9;Q96ER9-2	Coiled-coil domain-containing protein 51	CCDC51	sp|Q96ER9|MITOK_HUMAN Mitochondrial potassium channel OS=Homo sapiens (Human) OX=9606 GN=CCDC51 PE=1 SV=2;sp|Q96ER9-2|MITOK-2_HUMAN Isoform of Q96ER9, Isoform 2 of Mitochondrial potassium channel OS=Homo sapiens (Human) OX=9606 GN=CCDC51 PE=1 SV=2	1768400	1000800	1698600	1144800	1773500	1229600	1671400	1053000	1694100	1199200	1765700	1199900	4	20.7762	20.0166	20.7361	20.1424	20.6658	20.1601	-0.619667	5.09366	3.92197	20.4162	-10.7576	4.07343				keep	14		down	36.3	14	14	36.3	36.3	45.811	0	53.691	1538900000	19	411	19	19
Q15652;A0A1W2PNZ9;Q15652-3;Q15652-2;H7BXU7	Q15652;A0A1W2PNZ9;Q15652-3;Q15652-2	Probable JmjC domain-containing histone demethylation protein 2C	JMJD1C	sp|Q15652|JHD2C_HUMAN Probable JmjC domain-containing histone demethylation protein 2C OS=Homo sapiens (Human) OX=9606 GN=JMJD1C PE=1 SV=2;tr|A0A1W2PNZ9|A0A1W2PNZ9_HUMAN Isoform of Q15652, JmjC domain-containing protein OS=Homo sapiens (Human) OX=9606 GN=J	530850	324460	523100	331740	543280	370730	501840	338650	522380	349560	539960	361980	5	19.0402	18.3916	19.0369	18.3554	18.9589	18.4304	-0.619533	5.66154	4.28988	18.7022	-12.9188	5.48949				keep	17		down	8.4	17	17	8.4	8.4	284.52	0	69.88	231090000	17	2540	16	16
Q8IZQ5;A0A087WYP2;H0YE28;H3BV83	Q8IZQ5;A0A087WYP2;H0YE28	Selenoprotein H	SELH;C11orf31	sp|Q8IZQ5|SELH_HUMAN Selenoprotein H OS=Homo sapiens (Human) OX=9606 GN=SELENOH PE=1 SV=2;tr|A0A087WYP2|A0A087WYP2_HUMAN Isoform of Q8IZQ5, Selenoprotein H OS=Homo sapiens (Human) OX=9606 GN=SELENOH PE=1 SV=1;tr|H0YE28|H0YE28_HUMAN Isoform of Q8IZQ5, Selen	802310	505580	827000	560810	973420	603180	758540	526390	825990	590070	964340	591070	4	19.636	19.0315	19.6977	19.1129	19.8003	19.1326	-0.619	5.04866	3.89764	19.4018	-10.6004	3.96001				keep	6		down	31.1	6	6	31.1	31.1	13.453	0	20.121	815340000	7	122	7	7
Q8NBN3;Q8NBN3-3;Q8NBN3-2;H3BMU0;H3BTS6	Q8NBN3;Q8NBN3-3	Transmembrane protein 87A	TMEM87A	sp|Q8NBN3|TM87A_HUMAN Transmembrane protein 87A OS=Homo sapiens (Human) OX=9606 GN=TMEM87A PE=1 SV=3;sp|Q8NBN3-3|TM87A-3_HUMAN Isoform of Q8NBN3, Isoform 3 of Transmembrane protein 87A OS=Homo sapiens (Human) OX=9606 GN=TMEM87A PE=1 SV=3	279380	139260	269960	181430	223780	176910	263960	148790	267990	188530	224880	171900	5	18.1141	17.1713	18.0826	17.4848	17.6793	17.363	-0.618967	2.79158	2.25516	17.6492	-4.8067	-1.73277				keep	8		down	21.4	8	8	21.4	21.4	63.429	0	24.468	350250000	14	555	11	11
P56199	P56199	Integrin alpha-1	ITGA1	sp|P56199|ITA1_HUMAN Integrin alpha-1 OS=Homo sapiens (Human) OX=9606 GN=ITGA1 PE=1 SV=2	66247	42051	69210	42421	72890	49660	62635	43758	69037	44888	72361	48492	1	16.0378	15.4437	16.1189	15.3882	16.061	15.5302	-0.618533	5.2993	4.06048	15.7633	-11.4966	4.58646				keep	3		down	3.1	3	3	3.1	3.1	130.85	0	6.4166	31310000	3	1179	3	3
Q99594;A0A1X7SBS4;B5MCM0	Q99594;A0A1X7SBS4	Transcriptional enhancer factor TEF-5	TEAD3	sp|Q99594|TEAD3_HUMAN Transcriptional enhancer factor TEF-5 OS=Homo sapiens (Human) OX=9606 GN=TEAD3 PE=1 SV=2;tr|A0A1X7SBS4|A0A1X7SBS4_HUMAN Isoform of Q99594, Transcriptional enhancer factor TEF-5 OS=Homo sapiens (Human) OX=9606 GN=TEAD3 PE=1 SV=1	35847	22502	34534	23475	36715	22823	33891	23412	34580	24585	36465	22362	3	15.1518	14.5416	15.1159	14.5346	15.0717	14.4086	-0.6182	5.2644	4.03716	14.804	-11.37	4.50083				keep	4		down	22.5	6	4	27.1	22.5	48.676	0	11.95	34592000	4	435	2	2
Q9BUR4;E9PMG4;E9PMR3	Q9BUR4;E9PMG4;E9PMR3	Telomerase Cajal body protein 1	WRAP53	sp|Q9BUR4|TCAB1_HUMAN Telomerase Cajal body protein 1 OS=Homo sapiens (Human) OX=9606 GN=WRAP53 PE=1 SV=1;tr|E9PMG4|E9PMG4_HUMAN Isoform of Q9BUR4, WD_REPEATS_REGION domain-containing protein OS=Homo sapiens (Human) OX=9606 GN=WRAP53 PE=1 SV=1;tr|E9PMR3|E9	375580	232740	366260	235190	386530	258120	355070	242520	366150	247670	383960	252230	3	18.541	17.9122	18.5227	17.8592	18.4678	17.908	-0.617367	5.8041	4.36653	18.2018	-13.5195	5.84155				keep	9		down	31.2	9	9	31.2	31.2	59.309	0	77.934	379420000	16	548	15	15
Q96KM6	Q96KM6	Zinc finger protein 512B	ZNF512B	sp|Q96KM6|Z512B_HUMAN Zinc finger protein 512B OS=Homo sapiens (Human) OX=9606 GN=ZNF512B PE=1 SV=1	165700	125350	191240	120610	175140	97546	156750	128460	191390	126470	173940	95960	1	17.3604	17.0195	17.5852	16.8957	17.3257	16.5042	-0.6173	2.67589	2.1685	17.1151	-4.59028	-2.02238				keep	3		down	4.9	3	3	4.9	4.9	97.263	0	8.116	18002000	3	892	3	3
Q9HCK1;N0DVX5;A0A3B3ITZ5;A0A3B3ISF7;A0A3B3ISJ7;A0A3B3IRN6	Q9HCK1;N0DVX5;A0A3B3ITZ5;A0A3B3ISF7;A0A3B3ISJ7;A0A3B3IRN6	DBF4-type zinc finger-containing protein 2	ZDBF2	sp|Q9HCK1|ZDBF2_HUMAN DBF4-type zinc finger-containing protein 2 OS=Homo sapiens (Human) OX=9606 GN=ZDBF2 PE=1 SV=3;tr|N0DVX5|N0DVX5_HUMAN Isoform of Q9HCK1, DBF4-type zinc finger-containing protein 2 OS=Homo sapiens (Human) OX=9606 GN=ZDBF2 PE=1 SV=1;tr|A	83148	52907	82798	52012	84122	56272	78615	54999	82773	54806	83599	54984	6	16.3656	15.7751	16.3775	15.6823	16.2678	15.7105	-0.614333	5.37366	4.10292	16.0298	-11.7786	4.7739				keep	4		down	2.7	4	4	2.7	2.7	265.61	0	12.89	59004000	4	2354	4	4
Q9UBH6;Q9UBH6-2	Q9UBH6;Q9UBH6-2	Xenotropic and polytropic retrovirus receptor 1	XPR1	sp|Q9UBH6|XPR1_HUMAN Xenotropic and polytropic retrovirus receptor 1 OS=Homo sapiens (Human) OX=9606 GN=XPR1 PE=1 SV=1;sp|Q9UBH6-2|XPR1-2_HUMAN Isoform of Q9UBH6, Isoform 2 of Xenotropic and polytropic retrovirus receptor 1 OS=Homo sapiens (Human) OX=9606	726710	419620	730340	512620	811210	536890	686890	440850	728040	536230	806420	524800	2	19.4932	18.7626	19.5184	18.9832	19.5373	18.9646	-0.612833	4.6216	3.59556	19.2099	-9.21358	2.8863				keep	10		down	20.4	10	10	20.4	20.4	81.534	0	32.773	496070000	11	696	10	10
O75056;D3DPN2	O75056;D3DPN2	Syndecan-3;Syndecan	SDC3	sp|O75056|SDC3_HUMAN Syndecan-3 OS=Homo sapiens (Human) OX=9606 GN=SDC3 PE=1 SV=2;tr|D3DPN2|D3DPN2_HUMAN Isoform of O75056, Syndecan OS=Homo sapiens (Human) OX=9606 GN=SDC3 PE=1 SV=1	41911	25305	40566	25935	41727	29012	39620	26439	40522	27295	41506	28309	2	15.3773	14.711	15.3482	14.6783	15.2563	14.7547	-0.6126	5.40894	4.12148	15.021	-11.9136	4.8621				keep	2		down	6.6	2	2	6.6	6.6	45.496	0.0012795	2.3035	21529000	2	442	2	2
Q5JU69;Q8N2E6;Q5JU69-2	Q5JU69	Torsin-2A	TOR2A	sp|Q5JU69|TOR2A_HUMAN Torsin-2A OS=Homo sapiens (Human) OX=9606 GN=TOR2A PE=2 SV=1	89513	52482	80457	52892	86052	59927	84611	54944	80537	55603	85576	58471	3	16.472	15.7634	16.3361	15.7065	16.3005	15.8013	-0.612467	4.95861	3.83909	16.0633	-10.3	3.73883				keep	4		down	20.6	4	4	20.6	20.6	35.714	0	9.0299	19691000	4	321	4	4
O43896;I3L1B1	O43896	Kinesin-like protein KIF1C	KIF1C	sp|O43896|KIF1C_HUMAN Kinesin-like protein KIF1C OS=Homo sapiens (Human) OX=9606 GN=KIF1C PE=1 SV=3	140200	89469	146840	96342	171940	110780	132550	93054	146590	101700	170360	108390	2	17.1194	16.533	17.2041	16.5716	17.2991	16.6877	-0.6101	4.66354	3.62519	16.9025	-9.34187	2.99156				keep	7		down	9.9	11	7	14.1	9.9	122.95	0	33.939	145850000	7	1103	6	6
O95822;O95822-2	O95822;O95822-2	Malonyl-CoA decarboxylase, mitochondrial	MLYCD	sp|O95822|DCMC_HUMAN Malonyl-CoA decarboxylase, mitochondrial OS=Homo sapiens (Human) OX=9606 GN=MLYCD PE=1 SV=3;sp|O95822-2|DCMC-2_HUMAN Isoform of O95822, Isoform Cytoplasmic+peroxisomal of Malonyl-CoA decarboxylase, mitochondrial OS=Homo sapiens (Human)	472970	287430	460420	294710	468350	324810	447120	300120	459940	309990	465990	316970	2	18.8736	18.2167	18.8528	18.1847	18.7448	18.2396	-0.610067	5.38828	4.11126	18.5187	-11.8313	4.80842				keep	9		down	27.6	9	9	27.6	27.6	55.003	0	25.737	205580000	8	493	8	8
O75665;O75665-3;A6NF31;A0A0A0MS89;O75665-2	O75665;O75665-3;A6NF31;A0A0A0MS89	Oral-facial-digital syndrome 1 protein	OFD1	sp|O75665|OFD1_HUMAN Oral-facial-digital syndrome 1 protein OS=Homo sapiens (Human) OX=9606 GN=OFD1 PE=1 SV=1;sp|O75665-3|OFD1-3_HUMAN Isoform of O75665, Isoform 3 of Oral-facial-digital syndrome 1 protein OS=Homo sapiens (Human) OX=9606 GN=OFD1 PE=1 SV=1;	473790	309160	485890	314970	561790	358600	447990	320710	485820	332700	556530	351000	5	18.8761	18.3219	18.9304	18.2806	19.0073	18.3824	-0.609633	5.24413	4.02965	18.6331	-11.2959	4.45032				keep	13		down	15	13	13	15	15	116.67	0	50.374	202910000	12	1012	10	10
Q96KN1	Q96KN1	Protein FAM84B	FAM84B	sp|Q96KN1|LRAT2_HUMAN Protein LRATD2 OS=Homo sapiens (Human) OX=9606 GN=LRATD2 PE=1 SV=1	187830	115880	198430	129410	198290	133250	177570	120970	197770	135750	197340	130180	1	17.5413	16.9062	17.6384	16.9973	17.5048	16.9541	-0.608967	5.25259	4.03527	17.257	-11.3261	4.47091				keep	5		down	30	5	5	30	30	34.474	0	28.871	140710000	5	310	5	5
Q9UEY8	Q9UEY8	Gamma-adducin	ADD3	sp|Q9UEY8|ADDG_HUMAN Gamma-adducin OS=Homo sapiens (Human) OX=9606 GN=ADD3 PE=1 SV=1	2113600	1288800	2114400	1370400	2175400	1488500	1998100	1345900	2110500	1440300	2163900	1453300	1	21.0335	20.3815	21.052	20.4019	20.9604	20.4358	-0.6089	5.65956	4.28904	20.7108	-12.9117	5.4852				keep	17		down	36.5	17	2	36.5	6.4	79.154	0	70.024	2094800000	20	706	19	19
Q8TER5;Q8TER5-4;Q8TER5-3;Q8TER5-2;G3V3N2;G3V5C1	Q8TER5;Q8TER5-4;Q8TER5-3;Q8TER5-2	Rho guanine nucleotide exchange factor 40	ARHGEF40	sp|Q8TER5|ARH40_HUMAN Rho guanine nucleotide exchange factor 40 OS=Homo sapiens (Human) OX=9606 GN=ARHGEF40 PE=1 SV=3;sp|Q8TER5-4|ARH40-4_HUMAN Isoform of Q8TER5, Isoform 4 of Rho guanine nucleotide exchange factor 40 OS=Homo sapiens (Human) OX=9606 GN=ARH	271830	176430	290200	186460	326190	211820	257030	183240	289620	196890	323380	207200	6	18.0746	17.5126	18.1869	17.5242	18.2229	17.6228	-0.608267	5.00393	3.86733	17.8573	-10.4467	3.84762				keep	11		down	8.8	11	11	8.8	8.8	164.66	0	28.107	159610000	11	1519	11	11
Q9H2D1;A0A3B3IRK5;E5RGK5;E5RFL3;E5RGT9	Q9H2D1;A0A3B3IRK5	Mitochondrial folate transporter/carrier	SLC25A32	sp|Q9H2D1|MFTC_HUMAN Mitochondrial folate transporter/carrier OS=Homo sapiens (Human) OX=9606 GN=SLC25A32 PE=1 SV=2;tr|A0A3B3IRK5|A0A3B3IRK5_HUMAN ENSG00000285982 readthrough, Uncharacterized protein OS=Homo sapiens (Human) OX=9606 GN=ENSG00000285982 PE=3	101810	53888	97319	61298	85741	69694	96210	57139	96773	64231	85901	67661	5	16.6577	15.8016	16.6106	15.9193	16.2953	16.0191	-0.607867	3.32254	2.64069	16.2173	-5.87815	-0.396846				keep	3		down	18.4	3	3	18.4	18.4	35.407	0	10.007	87456000	4	315	3	3
P35613;P35613-2;P35613-4;A0A087WUV8;A0A087X2B5;I3L192	P35613;P35613-2;P35613-4;A0A087WUV8;A0A087X2B5;I3L192	Basigin	BSG	sp|P35613|BASI_HUMAN Basigin OS=Homo sapiens (Human) OX=9606 GN=BSG PE=1 SV=2;sp|P35613-2|BASI-2_HUMAN Isoform of P35613, Isoform 2 of Basigin OS=Homo sapiens (Human) OX=9606 GN=BSG PE=1 SV=2;sp|P35613-4|BASI-4_HUMAN Isoform of P35613, Isoform 4 of Basigin	2559200	1361100	2411400	1582300	2230800	1736800	2418400	1441800	2400500	1654300	2232100	1688300	6	21.3095	20.4602	21.2416	20.6093	20.9967	20.6584	-0.606633	3.65467	2.89179	20.8793	-6.62372	0.442292				keep	9		down	33.2	9	2	33.2	9.1	42.2	0	71.496	7300500000	25	385	25	23
O15067;H0YGH1;J3QSG0;J3QSH6;J3KTL4;J3KT98;J3QL39;J3KTQ5	O15067	Phosphoribosylformylglycinamidine synthase	PFAS	sp|O15067|PUR4_HUMAN Phosphoribosylformylglycinamidine synthase OS=Homo sapiens (Human) OX=9606 GN=PFAS PE=1 SV=4	6749000	4437600	7199300	4629200	8117200	5217200	6381700	4602800	7188600	4888200	8045200	5105300	8	22.7085	22.1652	22.8196	22.1581	22.8601	22.2452	-0.606567	5.09098	3.92168	22.4928	-10.747	4.06581				keep	42		down	51.3	42	42	51.3	51.3	144.73	0	323.31	10001000000	57	1338	50	50
Q9BQI0;Q9BQI0-3;Q9BQI0-2;A6PVM9;Q5JUP3;Q9BQI0-4	Q9BQI0;Q9BQI0-3;Q9BQI0-2;A6PVM9	Allograft inflammatory factor 1-like	AIF1L	sp|Q9BQI0|AIF1L_HUMAN Allograft inflammatory factor 1-like OS=Homo sapiens (Human) OX=9606 GN=AIF1L PE=1 SV=1;sp|Q9BQI0-3|AIF1L-3_HUMAN Isoform of Q9BQI0, Isoform 3 of Allograft inflammatory factor 1-like OS=Homo sapiens (Human) OX=9606 GN=AIF1L PE=1 SV=1;	255410	171140	256770	162430	272780	175160	241530	177010	257160	171350	270620	171410	6	17.9847	17.4687	18.0103	17.3252	17.965	17.3487	-0.6058	5.27572	4.04191	17.6838	-11.4103	4.52819				keep	4		down	22.7	4	4	22.7	22.7	17.068	0	12.524	156400000	5	150	4	4
P25929;B4DKL9	P25929;B4DKL9	Neuropeptide Y receptor type 1	NPY1R	sp|P25929|NPY1R_HUMAN Neuropeptide Y receptor type 1 OS=Homo sapiens (Human) OX=9606 GN=NPY1R PE=1 SV=1;tr|B4DKL9|B4DKL9_HUMAN Isoform of P25929, G_PROTEIN_RECEP_F1_2 domain-containing protein OS=Homo sapiens (Human) OX=9606 GN=NPY1R PE=1 SV=1	54714	37876	57176	36570	65131	40136	51745	39075	57253	38653	64480	39339	2	15.7619	15.2929	15.8433	15.1741	15.8986	15.223	-0.6046	5.09854	3.92431	15.5323	-10.7746	4.08559				keep	3		down	2.9	3	3	2.9	2.9	44.392	0	5.5567	31127000	3	384	3	3
Q9P0K7;Q9P0K7-3;Q9P0K7-2;Q9P0K7-4;D6RE17;D6REL2;D6R9G6;D6RF74;D6RB25;D6RBW6;D6RB27;D6R9G4;D6RBY4	Q9P0K7;Q9P0K7-3;Q9P0K7-2;Q9P0K7-4	Ankycorbin	RAI14	sp|Q9P0K7|RAI14_HUMAN Ankycorbin OS=Homo sapiens (Human) OX=9606 GN=RAI14 PE=1 SV=2;sp|Q9P0K7-3|RAI14-3_HUMAN Isoform of Q9P0K7, Isoform 3 of Ankycorbin OS=Homo sapiens (Human) OX=9606 GN=RAI14 PE=1 SV=2;sp|Q9P0K7-2|RAI14-2_HUMAN Isoform of Q9P0K7, Isoform	2219900	1383300	2193000	1390100	2258100	1559800	2098700	1440900	2191400	1464400	2245300	1522300	13	21.1043	20.4836	21.1046	20.4225	21.0143	20.5033	-0.6046	5.47366	4.16431	20.7721	-12.1637	5.02294				keep	28		down	38.1	28	28	38.1	38.1	110.04	0	135.9	1853000000	28	980	27	27
Q6XZF7;A0A1C7CYY6;A0A1B0GTX1;Q6XZF7-2	Q6XZF7;A0A1C7CYY6;A0A1B0GTX1;Q6XZF7-2	Dynamin-binding protein	DNMBP	sp|Q6XZF7|DNMBP_HUMAN Dynamin-binding protein OS=Homo sapiens (Human) OX=9606 GN=DNMBP PE=1 SV=1;tr|A0A1C7CYY6|A0A1C7CYY6_HUMAN Isoform of Q6XZF7, Dynamin-binding protein OS=Homo sapiens (Human) OX=9606 GN=DNMBP PE=1 SV=1;tr|A0A1B0GTX1|A0A1B0GTX1_HUMAN Iso	913570	564000	947410	605310	978680	677180	863680	588540	944700	637220	973290	660890	4	19.8234	19.1892	19.8938	19.223	19.8081	19.2995	-0.604533	5.38722	4.11126	19.5395	-11.8269	4.80554				keep	18		down	14.9	18	18	14.9	14.9	177.35	0	41.174	481960000	18	1577	17	17
Q86UU1;Q86UU1-2;Q86UU1-3;A0A087WZL0;A0A087WTZ7;A0A087WXY7	Q86UU1;Q86UU1-2;Q86UU1-3;A0A087WZL0	Pleckstrin homology-like domain family B member 1	PHLDB1	sp|Q86UU1|PHLB1_HUMAN Pleckstrin homology-like domain family B member 1 OS=Homo sapiens (Human) OX=9606 GN=PHLDB1 PE=1 SV=1;sp|Q86UU1-2|PHLB1-2_HUMAN Isoform of Q86UU1, Isoform 2 of Pleckstrin homology-like domain family B member 1 OS=Homo sapiens (Human)	501640	318750	519810	324510	562490	387480	474290	331610	518780	343140	558430	378210	6	18.9585	18.366	19.0278	18.3236	19.009	18.4941	-0.603867	5.02136	3.88001	18.6965	-10.5061	3.89125				keep	14		down	12.6	14	14	12.6	12.6	151.16	0	40.743	217850000	16	1377	16	16
P19440;E7ET76;P19440-2;A6NGU5;P36268;B5MCK8;P36268-2;P36268-3;E7ETR7;Q14390;B5MC36;A0A0C4DG87;B5MC34;A0A494C1J8;P19440-3;B5MD39	P19440;E7ET76;P19440-2;A6NGU5;P36268;B5MCK8;P36268-2;P36268-3	Gamma-glutamyltranspeptidase 1;Gamma-glutamyltranspeptidase 1 heavy chain;Gamma-glutamyltranspeptidase 1 light chain;Putative gamma-glutamyltranspeptidase 3;Putative gamma-glutamyltranspeptidase 3 heavy chain;Putative gamma-glutamyltranspeptidase 3 light chain;Inactive gamma-glutamyltranspeptidase 2	GGT1;GGT3P;GGT2	sp|P19440|GGT1_HUMAN Glutathione hydrolase 1 proenzyme OS=Homo sapiens (Human) OX=9606 GN=GGT1 PE=1 SV=2;tr|E7ET76|E7ET76_HUMAN Isoform of P19440, Glutathione hydrolase 1 proenzyme (Fragment) OS=Homo sapiens (Human) OX=9606 GN=GGT1 PE=1 SV=1;sp|P19440-2|GG	120910	85479	132870	77117	138000	92161	114350	88077	132760	82032	136820	90057	16	16.9058	16.4672	17.0598	16.2505	16.9819	16.4222	-0.602533	4.37059	3.41373	16.6812	-8.47402	2.25332				keep	5		down	10.5	5	5	10.5	10.5	61.409	0	12.863	108240000	5	569	5	5
O60279;H7C2K7	O60279	Sushi domain-containing protein 5	SUSD5	sp|O60279|SUSD5_HUMAN Sushi domain-containing protein 5 OS=Homo sapiens (Human) OX=9606 GN=SUSD5 PE=1 SV=3	380760	197220	336830	216370	268200	220900	359790	209380	335680	225490	269740	214370	2	18.5608	17.6733	18.4018	17.7389	17.9405	17.6834	-0.6025	2.47165	2.01199	17.9998	-4.22115	-2.5318				keep	8		down	16.2	8	8	16.2	16.2	68.02	0	17.203	396260000	9	629	9	9
Q86YZ3;CON__sp|Q86YZ3|HORN_HUMAN	Q86YZ3;CON__sp|Q86YZ3|HORN_HUMAN	Hornerin	HRNR	sp|Q86YZ3|HORN_HUMAN Hornerin OS=Homo sapiens (Human) OX=9606 GN=HRNR PE=1 SV=2;	10906	8807.9	11828	9487.5	14211	6029.9	10320	8959.4	11936	9828.4	14045	5986.7	2	13.4351	13.1885	13.5701	13.2275	13.7023	12.4883	-0.601067	1.85097	1.5282	13.2686	-3.18337	-4.05891			+	keep	4		down	5.2	4	4	5.2	5.2	282.39	0	12.785	33475000	4	2850	3	3
Q9NXT0;Q9NXT0-3;Q96HQ0;A6NNZ3;Q96HQ0-6;Q96HQ0-2;Q96HQ0-3;Q96HQ0-4;Q96HQ0-5	Q9NXT0;Q9NXT0-3	Zinc finger protein 586	ZNF586	sp|Q9NXT0|ZN586_HUMAN Zinc finger protein 586 OS=Homo sapiens (Human) OX=9606 GN=ZNF586 PE=2 SV=2;sp|Q9NXT0-3|ZN586-3_HUMAN Isoform of Q9NXT0, Isoform 3 of Zinc finger protein 586 OS=Homo sapiens (Human) OX=9606 GN=ZNF586 PE=4 SV=2	15643	9351.2	16103	10891	17398	11838	14787	9790.7	16052	11421	17301	11560	9	13.9555	13.2748	14.0152	13.4266	13.9942	13.4615	-0.600667	4.87943	3.77838	13.688	-10.0256	3.53155				keep	2		down	5	6	1	10.9	2.2	46.413	0.00012852	3.9742	22542000	2	402	2	2
Q96C36;A0A087WTV6;A0A087WZR9;J3KR12;A0A087WX69;A0A087WZF0	Q96C36;A0A087WTV6;A0A087WZR9	Pyrroline-5-carboxylate reductase 2;Pyrroline-5-carboxylate reductase	PYCR2	sp|Q96C36|P5CR2_HUMAN Pyrroline-5-carboxylate reductase 2 OS=Homo sapiens (Human) OX=9606 GN=PYCR2 PE=1 SV=1;tr|A0A087WTV6|A0A087WTV6_HUMAN Isoform of Q96C36, Pyrroline-5-carboxylate reductase 2 OS=Homo sapiens (Human) OX=9606 GN=PYCR2 PE=1 SV=1;tr|A0A087W	1001500	589080	971850	611000	913010	679480	946670	617250	969570	641830	911210	661490	6	19.956	19.252	19.9305	19.2365	19.7078	19.3044	-0.600467	4.31426	3.3751	19.5645	-8.31414	2.11027				keep	6		down	20.9	7	6	25	20.9	33.637	0	20.541	449950000	10	320	10	10
O15231-3;O15231;H0Y704;O15231-7;O15231-8;O15231-6;O15231-5;O15231-4;H7BZT5;H7C1R1	O15231-3;O15231;H0Y704;O15231-7;O15231-8;O15231-6;O15231-5;O15231-4;H7BZT5	Zinc finger protein 185	ZNF185	sp|O15231-3|ZN185-3_HUMAN Isoform of O15231, Isoform 3 of Zinc finger protein 185 OS=Homo sapiens (Human) OX=9606 GN=ZNF185 PE=1 SV=3;sp|O15231|ZN185_HUMAN Zinc finger protein 185 OS=Homo sapiens (Human) OX=9606 GN=ZNF185 PE=1 SV=3;tr|H0Y704|H0Y704_HUMAN I	199200	126430	206550	129350	208740	144710	188340	131550	206140	136320	207610	141220	10	17.6261	17.0319	17.6963	16.9966	17.5789	17.0732	-0.599867	5.39686	4.11577	17.3338	-11.8668	4.83165				keep	12		down	29.3	12	3	29.3	7.5	73.612	0	37.148	128780000	13	690	12	12
Q86YD5;E9PR86;Q86YD5-2	Q86YD5;E9PR86;Q86YD5-2	Low-density lipoprotein receptor class A domain-containing protein 3	LDLRAD3	sp|Q86YD5|LRAD3_HUMAN Low-density lipoprotein receptor class A domain-containing protein 3 OS=Homo sapiens (Human) OX=9606 GN=LDLRAD3 PE=2 SV=3;tr|E9PR86|E9PR86_HUMAN Isoform of Q86YD5, Low-density lipoprotein receptor class A domain-containing protein 3 O	93197	56182	92198	56616	86241	64248	88101	58730	91978	59604	86030	62544	3	16.5302	15.8617	16.5326	15.8046	16.3037	15.9017	-0.5995	4.32148	3.37969	16.1558	-8.33527	2.12931				keep	2		down	7.5	2	2	7.5	7.5	37.418	0.00012483	3.4686	37112000	2	345	2	2
M0R2C6;M0QZ95	M0R2C6		M0R2C6	tr|M0R2C6|M0R2C6_HUMAN ENSG00000269547 readthrough, Uncharacterized protein (Fragment) OS=Homo sapiens (Human) OX=9606 GN=ENSG00000269547 PE=4 SV=1	45881	29018	49284	29553	48209	35069	43379	30221	49092	31247	47985	34167	2	15.5078	14.9086	15.629	14.8667	15.4646	15.0283	-0.599267	4.62709	3.59903	15.2342	-9.22785	2.89807				keep	2		down	3.2	16	0	37.6	0	65.649	0.0029613	1.9841	34142000	2	588	2	2
O75391;I3L0X5;I3L4C3;I3L0Q5	O75391;I3L0X5;I3L4C3	Sperm-associated antigen 7	SPAG7	sp|O75391|SPAG7_HUMAN Sperm-associated antigen 7 OS=Homo sapiens (Human) OX=9606 GN=SPAG7 PE=1 SV=2;tr|I3L0X5|I3L0X5_HUMAN Isoform of O75391, R3H domain-containing protein OS=Homo sapiens (Human) OX=9606 GN=SPAG7 PE=1 SV=1;tr|I3L4C3|I3L4C3_HUMAN Isoform of	625760	429240	679550	445670	805510	494180	591780	443480	679340	470690	797130	484460	4	19.2775	18.7953	19.4144	18.7813	19.5271	18.845	-0.599133	4.47756	3.49176	19.1068	-8.78326	2.5236				keep	9		down	44.5	9	8	44.5	34.4	26.034	0	44.626	563690000	8	227	8	8
Q9BV38;U3KQC1;A0A0A0MQU0;K7EML4;A0A087X237;K7EKX5	Q9BV38;U3KQC1;A0A0A0MQU0;K7EML4	WD repeat-containing protein 18	WDR18	sp|Q9BV38|WDR18_HUMAN WD repeat-containing protein 18 OS=Homo sapiens (Human) OX=9606 GN=WDR18 PE=1 SV=2;tr|U3KQC1|U3KQC1_HUMAN Isoform of Q9BV38, WD_REPEATS_REGION domain-containing protein (Fragment) OS=Homo sapiens (Human) OX=9606 GN=WDR18 PE=1 SV=1;tr|	1444200	887940	1400600	870240	1404600	1015000	1365300	925960	1399600	917660	1398300	989100	6	20.4841	19.844	20.4578	19.7468	20.3293	19.8834	-0.599	4.79317	3.72253	20.1242	-9.75088	3.31869				keep	8		down	27.3	8	3	27.3	9	47.405	0	27.576	2400600000	9	432	8	8
Q9BYC9;I3L2X1;Q9BYC9-2	Q9BYC9	39S ribosomal protein L20, mitochondrial	MRPL20	sp|Q9BYC9|RM20_HUMAN 39S ribosomal protein L20, mitochondrial OS=Homo sapiens (Human) OX=9606 GN=MRPL20 PE=1 SV=1	2118300	1050900	2156700	1319000	1596200	1456300	2001400	1124600	2135000	1377900	1610800	1409200	3	21.0367	20.0871	21.0806	20.3467	20.5138	20.4042	-0.5977	2.24103	1.83542	20.5782	-3.82223	-3.10353				keep	4		down	28.2	4	4	28.2	28.2	17.442	0	10.237	776590000	5	149	5	5
Q9NRK6	Q9NRK6	ATP-binding cassette sub-family B member 10, mitochondrial	ABCB10	sp|Q9NRK6|ABCBA_HUMAN ATP-binding cassette sub-family B member 10, mitochondrial OS=Homo sapiens (Human) OX=9606 GN=ABCB10 PE=1 SV=2	999850	623720	948210	640870	1040300	683970	945270	649220	949770	672500	1033300	668740	1	19.9536	19.3344	19.895	19.3054	19.8962	19.3139	-0.597033	5.83565	4.38616	19.6164	-13.655	5.91875				keep	13		down	24	13	13	24	24	79.147	0	48.256	1057600000	15	738	14	14
Q9BVV7;J3QRI1;J3KRJ3	Q9BVV7;J3QRI1	Mitochondrial import inner membrane translocase subunit Tim21	TIMM21	sp|Q9BVV7|TIM21_HUMAN Mitochondrial import inner membrane translocase subunit Tim21 OS=Homo sapiens (Human) OX=9606 GN=TIMM21 PE=1 SV=1;tr|J3QRI1|J3QRI1_HUMAN Isoform of Q9BVV7, Mitochondrial import inner membrane translocase subunit Tim21 (Fragment) OS=Ho	409970	265840	375800	249300	393830	253890	387640	275480	377510	261570	391320	248420	3	18.6674	18.1041	18.5598	17.9432	18.4948	17.8842	-0.596833	4.2636	3.33832	18.2756	-8.17426	1.9832				keep	6		down	24.6	6	6	24.6	24.6	28.202	0	14.061	528130000	6	248	6	6
Q9BSY4;Q9BSY4-2;F8WC14	Q9BSY4;Q9BSY4-2	Coiled-coil-helix-coiled-coil-helix domain-containing protein 5	CHCHD5	sp|Q9BSY4|CHCH5_HUMAN Coiled-coil-helix-coiled-coil-helix domain-containing protein 5 OS=Homo sapiens (Human) OX=9606 GN=CHCHD5 PE=1 SV=1;sp|Q9BSY4-2|CHCH5-2_HUMAN Isoform of Q9BSY4, Isoform 2 of Coiled-coil-helix-coiled-coil-helix domain-containing protei	261770	151430	232370	162510	257250	176370	247430	158730	232750	170040	255910	172160	3	18.0202	17.2922	17.8662	17.3259	17.8804	17.3586	-0.5967	5.05355	3.89933	17.6239	-10.6181	3.97286				keep	5		down	60.9	5	5	60.9	60.9	12.395	0	21.388	352850000	8	110	6	6
Q08426;Q08426-2;C9JJE0	Q08426;Q08426-2	Peroxisomal bifunctional enzyme;Enoyl-CoA hydratase/3,2-trans-enoyl-CoA isomerase;3-hydroxyacyl-CoA dehydrogenase	EHHADH	sp|Q08426|ECHP_HUMAN Peroxisomal bifunctional enzyme OS=Homo sapiens (Human) OX=9606 GN=EHHADH PE=1 SV=3;sp|Q08426-2|ECHP-2_HUMAN Isoform of Q08426, Isoform 2 of Peroxisomal bifunctional enzyme OS=Homo sapiens (Human) OX=9606 GN=EHHADH PE=1 SV=3	74947	49307	75420	48933	79410	51723	70868	51092	75492	51468	78868	50589	3	16.2158	15.6734	16.2428	15.5942	16.1846	15.5889	-0.595567	5.59176	4.25104	15.9166	-12.6339	5.31675				keep	5		down	8.6	5	5	8.6	8.6	79.494	0	9.8852	43932000	5	723	4	4
Q9UK28;M0R134	Q9UK28;M0R134	Transmembrane protein 59-like	TMEM59L	sp|Q9UK28|TM59L_HUMAN Transmembrane protein 59-like OS=Homo sapiens (Human) OX=9606 GN=TMEM59L PE=2 SV=1;tr|M0R134|M0R134_HUMAN Isoform of Q9UK28, Transmembrane protein 59-like (Fragment) OS=Homo sapiens (Human) OX=9606 GN=TMEM59L PE=1 SV=1	60920	40118	56294	38809	65571	40225	57604	41514	56592	40746	64986	39433	2	15.9169	15.3758	15.8209	15.2598	15.9083	15.2262	-0.594767	4.9914	3.85855	15.5846	-10.3988	3.81226				keep	2		down	8.5	2	2	8.5	8.5	37.619	0	14.223	19801000	2	342	2	2
O76082;H7C1R8;O76082-3;H7BZF0;H7BZC0	O76082;H7C1R8;O76082-3	Solute carrier family 22 member 5	SLC22A5	sp|O76082|S22A5_HUMAN Solute carrier family 22 member 5 OS=Homo sapiens (Human) OX=9606 GN=SLC22A5 PE=1 SV=1;tr|H7C1R8|H7C1R8_HUMAN Isoform of O76082, Solute carrier family 22 member 5 (Fragment) OS=Homo sapiens (Human) OX=9606 GN=SLC22A5 PE=1 SV=1;sp|O760	50804	26149	45503	36329	50060	33967	48005	27789	45430	37547	49971	33172	5	15.6549	14.7584	15.5138	15.1645	15.519	14.9822	-0.5942	3.32817	2.6447	15.2655	-5.89028	-0.382619				keep	3		down	7.5	3	3	7.5	7.5	62.751	0.0001271	3.7993	7241300	2	557	2	2
Q12788;J3KNP2;A0A087WYP7	Q12788;J3KNP2	Transducin beta-like protein 3	TBL3	sp|Q12788|TBL3_HUMAN Transducin beta-like protein 3 OS=Homo sapiens (Human) OX=9606 GN=TBL3 PE=1 SV=2;tr|J3KNP2|J3KNP2_HUMAN Isoform of Q12788, WD_REPEATS_REGION domain-containing protein (Fragment) OS=Homo sapiens (Human) OX=9606 GN=TBL3 PE=1 SV=1	4193600	2318100	3792600	2233400	2749400	2356500	3963300	2443100	3782400	2339800	2768600	2284200	3	22.022	21.2284	21.8949	21.1065	21.2983	21.0986	-0.5939	2.03268	1.67171	21.4414	-3.47602	-3.61597				keep	27		down	49.5	27	27	49.5	49.5	89.034	0	149.4	5726900000	35	808	34	34
Q8TF68;Q8TF68-3;Q8TF68-2;E9PHB3;F5H8L7;R4GMR4;F5H105	Q8TF68;Q8TF68-3;Q8TF68-2;E9PHB3	Zinc finger protein 384	ZNF384	sp|Q8TF68|ZN384_HUMAN Zinc finger protein 384 OS=Homo sapiens (Human) OX=9606 GN=ZNF384 PE=1 SV=2;sp|Q8TF68-3|ZN384-3_HUMAN Isoform of Q8TF68, Isoform 3 of Zinc finger protein 384 OS=Homo sapiens (Human) OX=9606 GN=ZNF384 PE=1 SV=2;sp|Q8TF68-2|ZN384-2_HUMA	580540	332160	549010	328230	474540	387370	548710	348970	547410	345480	475050	376030	7	19.1693	18.4254	19.1066	18.3401	18.7637	18.4937	-0.593467	3.19335	2.54659	18.7165	-5.60468	-0.722695				keep	9		down	20.8	9	7	20.8	15.6	63.218	0	26.264	449940000	10	577	9	9
Q15043;Q15043-2;Q15043-3;E5RIP4;E5RFT1;E5RFZ8;E5RGA7;E5RJ40;E5RJG5	Q15043;Q15043-2;Q15043-3;E5RIP4;E5RFT1	Zinc transporter ZIP14	SLC39A14	sp|Q15043|S39AE_HUMAN Zinc transporter ZIP14 OS=Homo sapiens (Human) OX=9606 GN=SLC39A14 PE=1 SV=3;sp|Q15043-2|S39AE-2_HUMAN Isoform of Q15043, Isoform 2 of Zinc transporter ZIP14 OS=Homo sapiens (Human) OX=9606 GN=SLC39A14 PE=1 SV=3;sp|Q15043-3|S39AE-3_HU	1362500	843810	1323100	874400	1356400	925620	1288100	879290	1323300	917050	1349900	903790	9	20.4	19.7705	20.3757	19.7537	20.2789	19.7504	-0.593333	5.44491	4.1463	20.0549	-12.052	4.95149				keep	6		down	15.7	6	6	15.7	15.7	54.212	0	59.909	3002900000	10	492	10	10
Q03167;Q03167-2;E9PKY4	Q03167;Q03167-2	Transforming growth factor beta receptor type 3	TGFBR3	sp|Q03167|TGBR3_HUMAN Transforming growth factor beta receptor type 3 OS=Homo sapiens (Human) OX=9606 GN=TGFBR3 PE=1 SV=3;sp|Q03167-2|TGBR3-2_HUMAN Isoform of Q03167, Isoform 2 of Transforming growth factor beta receptor type 3 OS=Homo sapiens (Human) OX=9	125940	80892	130360	89006	160970	102580	119070	84062	130280	93800	159410	100420	3	16.9646	16.3876	17.0323	16.4573	17.204	16.5767	-0.5931	4.06905	3.19678	16.7704	-7.64969	1.49002				keep	3		down	4.3	3	3	4.3	4.3	93.498	0	10.409	4469800	2	851	2	2
Q96RL1;Q96RL1-3;Q96RL1-2;Q96RL1-4;D6RC40;D6RCQ3;Q96RL1-5;D6R9M3;D6RDZ5	Q96RL1;Q96RL1-3;Q96RL1-2	BRCA1-A complex subunit RAP80	UIMC1	sp|Q96RL1|UIMC1_HUMAN BRCA1-A complex subunit RAP80 OS=Homo sapiens (Human) OX=9606 GN=UIMC1 PE=1 SV=2;sp|Q96RL1-3|UIMC1-3_HUMAN Isoform of Q96RL1, Isoform 3 of BRCA1-A complex subunit RAP80 OS=Homo sapiens (Human) OX=9606 GN=UIMC1 PE=1 SV=2;sp|Q96RL1-2|UI	995490	593410	948330	608840	952950	696300	941020	620270	947470	639890	949560	678270	9	19.9473	19.2626	19.8952	19.2314	19.7696	19.3397	-0.5928	4.78781	3.71835	19.5743	-9.73112	3.30317				keep	17		down	33.9	17	17	33.9	33.9	79.727	0	54.621	734060000	18	719	17	15
P52926;F5H2U8;F5H2A4;F5H6H0;P52926-3;P52926-6;P52926-4;P52926-5;P52926-2	P52926;F5H2U8;F5H2A4;F5H6H0;P52926-3;P52926-6;P52926-4;P52926-5;P52926-2	High mobility group protein HMGI-C	HMGA2	sp|P52926|HMGA2_HUMAN High mobility group protein HMGI-C OS=Homo sapiens (Human) OX=9606 GN=HMGA2 PE=1 SV=1;tr|F5H2U8|F5H2U8_HUMAN Isoform of P52926, High mobility group protein HMGI-C OS=Homo sapiens (Human) OX=9606 GN=HMGA2 PE=1 SV=1;tr|F5H2A4|F5H2A4_HUM	839660	591480	782940	486140	780210	498890	794140	608210	788310	512400	774810	488290	9	19.7017	19.2579	19.6187	18.9067	19.4811	18.8587	-0.592733	3.06247	2.45279	19.3041	-5.33633	-1.05236				keep	6		down	58.7	6	6	58.7	58.7	11.832	0	64.143	2042800000	12	109	12	12
Q8IWA4;Q8IWA4-3;H7C5H5;Q8IWA4-2;C9JXQ1;C9JQT7	Q8IWA4;Q8IWA4-3;H7C5H5	Mitofusin-1	MFN1	sp|Q8IWA4|MFN1_HUMAN Mitofusin-1 OS=Homo sapiens (Human) OX=9606 GN=MFN1 PE=1 SV=3;sp|Q8IWA4-3|MFN1-3_HUMAN Isoform of Q8IWA4, Isoform 3 of Mitofusin-1 OS=Homo sapiens (Human) OX=9606 GN=MFN1 PE=1 SV=3;tr|H7C5H5|H7C5H5_HUMAN Isoform of Q8IWA4, Dynamin-type	1053000	655530	1085900	699060	1061500	740690	995520	683380	1083400	733670	1057500	722650	6	20.0283	19.4062	20.0906	19.4308	19.9252	19.4289	-0.592733	5.13906	3.95538	19.7183	-10.917	4.18685				keep	18		down	31.2	18	18	31.2	31.2	84.159	0	53.618	744560000	18	741	16	16
Q8N137;Q8N137-5;Q8N137-3;Q8N137-2;Q8N137-4;I3L1B0	Q8N137;Q8N137-5;Q8N137-3;Q8N137-2;Q8N137-4	Centrobin	CNTROB	sp|Q8N137|CNTRB_HUMAN Centrobin OS=Homo sapiens (Human) OX=9606 GN=CNTROB PE=1 SV=1;sp|Q8N137-5|CNTRB-5_HUMAN Isoform of Q8N137, Isoform 5 of Centrobin OS=Homo sapiens (Human) OX=9606 GN=CNTROB PE=1 SV=1;sp|Q8N137-3|CNTRB-3_HUMAN Isoform of Q8N137, Isoform	118110	78299	114380	76358	126390	79903	111680	81025	114740	80245	125390	78239	6	16.872	16.3406	16.8436	16.2362	16.8551	16.2163	-0.592533	5.39147	4.11182	16.5606	-11.8453	4.81762				keep	3		down	5.3	3	3	5.3	5.3	101.25	0	10.188	62705000	3	903	3	3
Q15696;Q15695;A6NDW0	Q15696;Q15695	U2 small nuclear ribonucleoprotein auxiliary factor 35 kDa subunit-related protein 2;U2 small nuclear ribonucleoprotein auxiliary factor 35 kDa subunit-related protein 1	ZRSR2;ZRSR1	sp|Q15696|U2AFM_HUMAN U2 small nuclear ribonucleoprotein auxiliary factor 35 kDa subunit-related protein 2 OS=Homo sapiens (Human) OX=9606 GN=ZRSR2 PE=1 SV=2;sp|Q15695|U2AFL_HUMAN Putative U2 small nuclear ribonucleoprotein auxiliary factor 35 kDa subunit-	157850	86932	157460	93765	115400	98491	149180	91814	156470	98160	116200	95481	3	17.2904	16.4915	17.3048	16.5325	16.7239	16.5181	-0.592333	2.37959	1.94395	16.8102	-4.05978	-2.76051				keep	5		down	16.8	5	5	16.8	16.8	58.044	0	14.655	84670000	3	482	3	3
Q5W111;Q5W111-2	Q5W111;Q5W111-2	SPRY domain-containing protein 7	SPRYD7	sp|Q5W111|SPRY7_HUMAN SPRY domain-containing protein 7 OS=Homo sapiens (Human) OX=9606 GN=SPRYD7 PE=1 SV=2;sp|Q5W111-2|SPRY7-2_HUMAN Isoform of Q5W111, Isoform 2 of SPRY domain-containing protein 7 OS=Homo sapiens (Human) OX=9606 GN=SPRYD7 PE=1 SV=2	173470	101690	166860	100520	135160	107160	163970	106580	166430	105460	135480	104110	2	17.4266	16.7177	17.3884	16.6328	16.9519	16.6398	-0.5922	2.85443	2.30053	16.9595	-4.92664	-1.57518				keep	5		down	29.6	5	5	29.6	29.6	21.666	0	11.711	188590000	4	196	3	3
Q15836;K7ENK9;K7EKX0	Q15836;K7ENK9;K7EKX0	Vesicle-associated membrane protein 3	VAMP3;VAMP2	sp|Q15836|VAMP3_HUMAN Vesicle-associated membrane protein 3 OS=Homo sapiens (Human) OX=9606 GN=VAMP3 PE=1 SV=3;tr|K7ENK9|K7ENK9_HUMAN Isoform of P63027, V-SNARE coiled-coil homology domain-containing protein OS=Homo sapiens (Human) OX=9606 GN=VAMP2 PE=4 SV	757060	480670	747690	523350	850030	536030	715780	499730	748510	548090	843670	524920	3	19.5523	18.9586	19.5522	19.0131	19.6047	18.9623	-0.591733	5.73518	4.33442	19.2739	-13.2291	5.67333				keep	4		down	41	4	2	41	17	11.309	0	29.505	1563600000	7	100	7	7
P49810;B1AP22;P49810-3;P49810-2;E5RHT1;E5RFW4;E5RG63	P49810;B1AP22;P49810-3;P49810-2	Presenilin-2;Presenilin-2 NTF subunit;Presenilin-2 CTF subunit;Presenilin	PSEN2	sp|P49810|PSN2_HUMAN Presenilin-2 OS=Homo sapiens (Human) OX=9606 GN=PSEN2 PE=1 SV=1;tr|B1AP22|B1AP22_HUMAN Isoform of P49810, Presenilin OS=Homo sapiens (Human) OX=9606 GN=PSEN2 PE=1 SV=1;sp|P49810-3|PSN2-3_HUMAN Isoform of P49810, Isoform 3 of Presenilin	53484	33772	51570	39831	63938	36767	50566	35117	51725	41474	63371	36139	7	15.729	15.1274	15.6944	15.2973	15.872	15.0965	-0.5914	4.23657	3.31545	15.4694	-8.09962	1.91464				keep	3		down	9.2	3	2	9.2	7.1	50.14	0	25.438	24376000	2	448	2	2
Q6ZRV2;J3KPS2;A0A494C1T9	Q6ZRV2;J3KPS2;A0A494C1T9	Protein FAM83H	FAM83H	sp|Q6ZRV2|FA83H_HUMAN Protein FAM83H OS=Homo sapiens (Human) OX=9606 GN=FAM83H PE=1 SV=3;tr|J3KPS2|J3KPS2_HUMAN Isoform of Q6ZRV2, Protein FAM83H (Fragment) OS=Homo sapiens (Human) OX=9606 GN=FAM83H PE=1 SV=1;tr|A0A494C1T9|A0A494C1T9_HUMAN Isoform of Q6ZRV	73672	49082	82621	53522	88201	57345	69665	50884	82390	56337	87564	56091	3	16.1911	15.6668	16.3744	15.7236	16.3361	15.7377	-0.591167	4.82974	3.74609	16.005	-9.87027	3.41184				keep	5		down	8.1	5	5	8.1	8.1	127.12	0	37.153	67599000	5	1179	5	5
Q9Y3A2;Q9Y3A2-2	Q9Y3A2	Probable U3 small nucleolar RNA-associated protein 11	UTP11L	sp|Q9Y3A2|UTP11_HUMAN Probable U3 small nucleolar RNA-associated protein 11 OS=Homo sapiens (Human) OX=9606 GN=UTP11 PE=1 SV=2	734260	467470	763520	458910	631940	464080	694230	486260	761680	481890	631900	451990	2	19.5082	18.9184	19.5825	18.8236	19.177	18.7544	-0.590433	3.18399	2.54013	19.1274	-5.58521	-0.746278				keep	7		down	27.3	7	7	27.3	27.3	30.446	0	17.441	571280000	7	253	7	7
Q6P1X6;H0YF29;Q6P1X6-2;J3KNI2	Q6P1X6;H0YF29;Q6P1X6-2	UPF0598 protein C8orf82	C8orf82	sp|Q6P1X6|CH082_HUMAN UPF0598 protein C8orf82 OS=Homo sapiens (Human) OX=9606 GN=C8orf82 PE=1 SV=2;tr|H0YF29|H0YF29_HUMAN Isoform of Q6P1X6, UPF0598 protein C8orf82 (Fragment) OS=Homo sapiens (Human) OX=9606 GN=C8orf82 PE=1 SV=1;sp|Q6P1X6-2|CH082-2_HUMAN I	252560	153090	246720	164050	267350	186440	238750	159910	246510	172360	265870	181900	4	17.9685	17.3079	17.9527	17.3395	17.9359	17.4387	-0.590333	5.35164	4.08991	17.6572	-11.6929	4.71737				keep	5		down	31.9	5	5	31.9	31.9	23.889	0	11.098	169400000	6	216	6	6
Q71DI3	Q71DI3	Histone H3.2	HIST2H3A	sp|Q71DI3|H32_HUMAN Histone H3.2 OS=Homo sapiens (Human) OX=9606 GN=HIST2H3C PE=1 SV=3	13206000	9640200	12060000	6946500	11654000	7806100	12492000	9878000	12168000	7371300	11572000	7627000	1	23.6769	23.2845	23.5639	22.7436	23.3819	22.8265	-0.589367	2.39934	1.95813	23.2462	-4.09414	-2.71151				keep	6		down	52.9	6	1	52.9	23.5	15.388	0	18.755	37168000000	12	136	11	11
Q99720;Q5T1J1;Q99720-5;Q99720-2;Q99720-3	Q99720;Q5T1J1;Q99720-5;Q99720-2;Q99720-3	Sigma non-opioid intracellular receptor 1	SIGMAR1	sp|Q99720|SGMR1_HUMAN Sigma non-opioid intracellular receptor 1 OS=Homo sapiens (Human) OX=9606 GN=SIGMAR1 PE=1 SV=1;tr|Q5T1J1|Q5T1J1_HUMAN Isoform of Q99720, HCG20471, isoform CRA_c OS=Homo sapiens (Human) OX=9606 GN=SIGMAR1 PE=1 SV=1;sp|Q99720-5|SGMR1-5_	73831	41644	72626	50222	74108	53778	69781	43850	72380	52437	73945	52398	5	16.1942	15.4297	16.1884	15.6318	16.0849	15.6451	-0.586967	4.3279	3.38315	15.8624	-8.35194	2.1443				keep	2		down	20.2	2	2	20.2	20.2	25.127	0	4.7853	203660000	3	223	3	3
Q8TAA5;D6RGI6;Q8TAA5-2	Q8TAA5;D6RGI6	GrpE protein homolog 2, mitochondrial	GRPEL2	sp|Q8TAA5|GRPE2_HUMAN GrpE protein homolog 2, mitochondrial OS=Homo sapiens (Human) OX=9606 GN=GRPEL2 PE=1 SV=1;tr|D6RGI6|D6RGI6_HUMAN Isoform of Q8TAA5, GrpE protein homolog 2, mitochondrial OS=Homo sapiens (Human) OX=9606 GN=GRPEL2 PE=1 SV=1	327290	195910	310320	204930	315390	226000	309380	204810	310240	214890	314260	220290	3	18.3424	17.6637	18.2836	17.6605	18.1744	17.7163	-0.586633	5.01011	3.87025	17.9735	-10.4675	3.86286				keep	4		down	22.7	4	4	22.7	22.7	25.431	0	7.623	250770000	4	225	4	4
Q9H936;E9PJH7;A0A0D9SFE1;E9PI74;A0A0D9SEI9;K4DIA8;K4DIB8;K4DIB3;K4DIB6;A0A0D9SG84;K4DIA2;K4DIB0;A0A0D9SFA8;E9PQ36;E9PJY0;E9PS95;A0A0A6YYN8;K4DIB4;Q9H1K4	Q9H936;E9PJH7;A0A0D9SFE1;E9PI74;A0A0D9SEI9;K4DIA8;K4DIB8;K4DIB3;K4DIB6;A0A0D9SG84;K4DIA2;K4DIB0;A0A0D9SFA8;E9PQ36;E9PJY0;E9PS95;A0A0A6YYN8;K4DIB4	Mitochondrial glutamate carrier 1	SLC25A22	sp|Q9H936|GHC1_HUMAN Mitochondrial glutamate carrier 1 OS=Homo sapiens (Human) OX=9606 GN=SLC25A22 PE=1 SV=1;tr|E9PJH7|E9PJH7_HUMAN Isoform of Q9H936, Mitochondrial glutamate carrier 1 (Fragment) OS=Homo sapiens (Human) OX=9606 GN=SLC25A22 PE=1 SV=5;tr|A0A	225250	141010	213220	141580	236880	161410	212960	146720	213580	148930	235310	157610	19	17.8034	17.1893	17.7421	17.127	17.7614	17.2307	-0.586633	5.4698	4.16368	17.4757	-12.1471	5.01234				keep	6		down	29.7	6	6	29.7	29.7	34.47	0	42.101	174790000	6	323	6	6
Q53H12;E9PC15;A0A3B3ITD0;A0A3B3ISZ0;A0A3B3ISY9;A0A0G2JLG5;E9PG39;A0A3B3ITX7;A0A3B3IS09;A0A3B3ITV0;A0A0G2JLD0;A0A3B3IUC9;F8WDD1;A0A3B3IRM6;Q53H12-2	Q53H12;E9PC15;A0A3B3ITD0;A0A3B3ISZ0;A0A3B3ISY9;A0A0G2JLG5;E9PG39	Acylglycerol kinase, mitochondrial	AGK	sp|Q53H12|AGK_HUMAN Acylglycerol kinase, mitochondrial OS=Homo sapiens (Human) OX=9606 GN=AGK PE=1 SV=2;tr|E9PC15|E9PC15_HUMAN Isoform of Q53H12, DAGKc domain-containing protein OS=Homo sapiens (Human) OX=9606 GN=AGK PE=1 SV=1;tr|A0A3B3ITD0|A0A3B3ITD0_HUMA	2284300	1308300	2120000	1313800	1815100	1448700	2159100	1373900	2116200	1377300	1818300	1407200	15	21.1455	20.4032	21.0558	20.341	20.6992	20.3967	-0.586533	3.09352	2.47551	20.6736	-5.39923	-0.9742				keep	17		down	44.5	17	17	44.5	44.5	47.137	0	59.85	2561200000	23	422	22	22
Q0VF96;Q0VF96-2	Q0VF96	Cingulin-like protein 1	CGNL1	sp|Q0VF96|CGNL1_HUMAN Cingulin-like protein 1 OS=Homo sapiens (Human) OX=9606 GN=CGNL1 PE=1 SV=2	1036800	641420	1002100	687000	1099000	735890	980210	668420	1002800	719920	1092500	719020	2	20.0059	19.3748	19.9748	19.4057	19.9753	19.4195	-0.585333	5.84771	4.39794	19.6927	-13.7122	5.95112				keep	21		down	20.7	21	21	20.7	20.7	149.08	0	80.033	460680000	23	1302	21	21
Q96FF9;B5MBX0;H0YCL8	Q96FF9;B5MBX0	Sororin	CDCA5	sp|Q96FF9|CDCA5_HUMAN Sororin OS=Homo sapiens (Human) OX=9606 GN=CDCA5 PE=1 SV=1;tr|B5MBX0|B5MBX0_HUMAN Isoform of Q96FF9, Sororin OS=Homo sapiens (Human) OX=9606 GN=CDCA5 PE=1 SV=1	269270	148170	267590	172840	228870	183030	254480	156500	266160	180470	229560	177780	3	18.0609	17.2608	18.0698	17.4148	17.7117	17.4121	-0.5849	3.24527	2.58301	17.655	-5.71353	-0.591787				keep	5			36.9	5	5	36.9	36.9	27.6	0	77.034	417610000	6	252	5	5
Q13330-3	Q13330-3	Metastasis-associated protein MTA1	MTA1	sp|Q13330-3|MTA1-3_HUMAN Isoform of Q13330, Isoform 3 of Metastasis-associated protein MTA1 OS=Homo sapiens (Human) OX=9606 GN=MTA1 PE=1 SV=2	2036600	1159000	1952700	1164400	1426900	1196500	1924900	1218700	1945400	1218600	1436300	1160500	1	20.98	20.2283	20.9372	20.1669	20.352	20.1208	-0.5844	2.20656	1.80706	20.4642	-3.76408	-3.18861				keep	22			41.4	24	1	44.1	2.4	79.192	0	130.09	2004600000	24	698	22	22
Q96L58	Q96L58	Beta-1,3-galactosyltransferase 6	B3GALT6	sp|Q96L58|B3GT6_HUMAN Beta-1,3-galactosyltransferase 6 OS=Homo sapiens (Human) OX=9606 GN=B3GALT6 PE=1 SV=2	287210	167440	274320	189200	277540	196520	271480	175570	274020	197520	276830	191640	1	18.154	17.4372	18.1057	17.5453	17.9899	17.5147	-0.584133	4.83565	3.75024	17.7911	-9.88632	3.42429				keep	4			14.9	4	4	14.9	14.9	37.137	0	10.128	117960000	4	329	4	4
P18669;P15259;Q8N0Y7	P18669	Phosphoglycerate mutase 1	PGAM1	sp|P18669|PGAM1_HUMAN Phosphoglycerate mutase 1 OS=Homo sapiens (Human) OX=9606 GN=PGAM1 PE=1 SV=2	9407500	5632000	9689700	5622100	7877700	6470900	8892900	5895800	9644300	5922100	7894000	6280100	3	23.1876	22.5091	23.2482	22.4384	22.8169	22.5559	-0.5831	3.05585	2.44815	22.7927	-5.32299	-1.06901				keep	14			66.1	14	14	66.1	66.1	28.804	0	79.373	19300000000	62	254	50	50
Q9NZ45	Q9NZ45	CDGSH iron-sulfur domain-containing protein 1	CISD1	sp|Q9NZ45|CISD1_HUMAN CDGSH iron-sulfur domain-containing protein 1 OS=Homo sapiens (Human) OX=9606 GN=CISD1 PE=1 SV=1	1809900	1137300	1777400	1160200	1821700	1268600	1711200	1183500	1777700	1218300	1813200	1237800	1	20.8097	20.2011	20.8015	20.1617	20.7044	20.2052	-0.582533	5.41229	4.12205	20.4806	-11.9263	4.8703				keep	4			44.4	4	4	44.4	44.4	12.199	0	10.954	6228800000	12	108	9	9
Q9BYE7;A0A3B3ISZ4;Q9BYE7-3	Q9BYE7	Polycomb group RING finger protein 6	PCGF6	sp|Q9BYE7|PCGF6_HUMAN Polycomb group RING finger protein 6 OS=Homo sapiens (Human) OX=9606 GN=PCGF6 PE=1 SV=2	87225	53470	90079	53289	74440	58731	82459	55834	89743	56050	74528	57070	3	16.4347	15.7903	16.4991	15.7173	16.0914	15.7722	-0.5818	3.23081	2.57318	16.0508	-5.68308	-0.628253				keep	5			21.1	5	5	21.1	21.1	39.047	0	20.171	85368000	7	350	6	6
P61024;Q5T179;Q9BZU3	P61024;Q5T179	Cyclin-dependent kinases regulatory subunit 1;Cyclin-dependent kinases regulatory subunit	CKS1B	sp|P61024|CKS1_HUMAN Cyclin-dependent kinases regulatory subunit 1 OS=Homo sapiens (Human) OX=9606 GN=CKS1B PE=1 SV=1;tr|Q5T179|Q5T179_HUMAN Isoform of P61024, Cyclin-dependent kinases regulatory subunit OS=Homo sapiens (Human) OX=9606 GN=CKS1B PE=1 SV=1	486060	258520	539950	316700	369790	339230	459320	274740	534010	331350	373670	328210	3	18.913	18.0638	19.0826	18.2885	18.4039	18.3023	-0.581633	2.0687	1.70068	18.509	-3.535	-3.52771				keep	3			32.9	3	3	32.9	32.9	9.6601	0	4.6008	929590000	6	79	6	6
Q8TE04;Q9H999;Q8TE04-2;Q8TE04-4;Q8TE04-3	Q8TE04;Q9H999;Q8TE04-2;Q8TE04-4	Pantothenate kinase 1;Pantothenate kinase 3	PANK1;PANK3	sp|Q8TE04|PANK1_HUMAN Pantothenate kinase 1 OS=Homo sapiens (Human) OX=9606 GN=PANK1 PE=1 SV=2;sp|Q9H999|PANK3_HUMAN Pantothenate kinase 3 OS=Homo sapiens (Human) OX=9606 GN=PANK3 PE=1 SV=1;sp|Q8TE04-2|PANK1-2_HUMAN Isoform of Q8TE04, Isoform 2 of Pantothe	55423	33168	64334	47043	80268	52495	52391	34799	63925	49264	79633	51336	5	15.7804	15.1014	16.0135	15.5374	16.2001	15.6103	-0.581633	2.2475	1.84015	15.7072	-3.83319	-3.08755				keep	2			3.5	3	2	5	3.5	64.339	0.00012355	3.2503	55776000	2	598	2	2
Q5VT66;Q5VT66-2;H7BYZ9;Q5VT66-3;A0A494C1P3;Q969Z3;F6V6Z1;H0YDX4;X6RIL1;Q969Z3-2	Q5VT66;Q5VT66-2;H7BYZ9;Q5VT66-3;A0A494C1P3	Mitochondrial amidoxime-reducing component 1	MTARC1	sp|Q5VT66|MARC1_HUMAN Mitochondrial amidoxime-reducing component 1 OS=Homo sapiens (Human) OX=9606 GN=MTARC1 PE=1 SV=1;sp|Q5VT66-2|MARC1-2_HUMAN Isoform of Q5VT66, Isoform 2 of Mitochondrial amidoxime-reducing component 1 OS=Homo sapiens (Human) OX=9606 GN	661960	415820	632600	421750	654040	447490	625840	432560	633530	442100	650940	436890	10	19.3586	18.7495	19.3111	18.7017	19.2266	18.7019	-0.581067	5.27003	4.03858	19.0082	-11.3888	4.51358				keep	6			25.5	6	6	25.5	25.5	37.499	0	22.083	765300000	6	337	5	5
O14683;E9PN66;E9PKN9;E9PS55;E9PMW4;E9PQ46;E9PIN5;E9PIK4;U3KQ32;E9PKZ4;E9PPM1;E9PNB3;E9PMY0	O14683;E9PN66;E9PKN9;E9PS55;E9PMW4;E9PQ46;E9PIN5;E9PIK4;U3KQ32;E9PKZ4;E9PPM1;E9PNB3;E9PMY0	Tumor protein p53-inducible protein 11	TP53I11	sp|O14683|P5I11_HUMAN Tumor protein p53-inducible protein 11 OS=Homo sapiens (Human) OX=9606 GN=TP53I11 PE=1 SV=2;tr|E9PN66|E9PN66_HUMAN Isoform of O14683, Tumor protein p53-inducible protein 11 (Fragment) OS=Homo sapiens (Human) OX=9606 GN=TP53I11 PE=1 SV	136770	86815	138750	90121	134470	93661	129310	90296	138640	94466	134010	91386	13	17.0836	16.4895	17.1223	16.4753	16.9445	16.4455	-0.580033	4.89279	3.78937	16.7601	-10.0688	3.56454				keep	3			18	3	3	18	18	21.054	0	23.429	96058000	3	189	3	3
Q96JN8;I3L100;I3L2W2;Q96JN8-2;I3L2Z9;K7ESM1;K7ESJ6;K7EPS7	Q96JN8;I3L100;I3L2W2;Q96JN8-2	Neuralized-like protein 4	NEURL4	sp|Q96JN8|NEUL4_HUMAN Neuralized-like protein 4 OS=Homo sapiens (Human) OX=9606 GN=NEURL4 PE=1 SV=2;tr|I3L100|I3L100_HUMAN Isoform of Q96JN8, Neuralized-like protein 4 (Fragment) OS=Homo sapiens (Human) OX=9606 GN=NEURL4 PE=1 SV=8;tr|I3L2W2|I3L2W2_HUMAN Is	257310	156980	268630	188160	294820	198270	243250	164030	267940	196770	293250	193690	8	17.9954	17.3441	18.0754	17.5373	18.0771	17.5275	-0.579667	4.54363	3.54262	17.7595	-8.97815	2.68976				keep	12			10.1	12	12	10.1	10.1	166.9	0	50.229	202540000	12	1562	12	12
Q8WZ82	Q8WZ82	Ovarian cancer-associated gene 2 protein	OVCA2	sp|Q8WZ82|OVCA2_HUMAN Esterase OVCA2 OS=Homo sapiens (Human) OX=9606 GN=OVCA2 PE=1 SV=1	23145	15020	24124	17250	27661	17136	21884	15594	24126	18035	27453	16792	1	14.5206	13.9585	14.5983	14.09	14.6631	13.9951	-0.579467	4.85078	3.76015	14.3043	-9.93996	3.46575				keep	2			12.3	2	2	12.3	12.3	24.418	0	16.016	51404000	2	227	2	2
Q96D05;Q96D05-2;Q5VVH9	Q96D05;Q96D05-2;Q5VVH9	Uncharacterized protein C10orf35	C10orf35	sp|Q96D05|F241B_HUMAN Protein FAM241B OS=Homo sapiens (Human) OX=9606 GN=FAM241B PE=1 SV=1;sp|Q96D05-2|F241B-2_HUMAN Isoform of Q96D05, Isoform 2 of Protein FAM241B OS=Homo sapiens (Human) OX=9606 GN=FAM241B PE=1 SV=1;tr|Q5VVH9|Q5VVH9_HUMAN Isoform of Q96D	127580	73811	121120	87822	134300	92131	120590	77454	121050	91584	133720	89940	3	16.9833	16.2554	16.9262	16.438	16.9427	16.4218	-0.579	4.74232	3.68676	16.6612	-9.59079	3.19214				keep	2			22.3	2	2	22.3	22.3	13.238	0	6.8891	53663000	3	121	3	3
Q8N4V1;Q8N4V1-2	Q8N4V1;Q8N4V1-2	Membrane magnesium transporter 1	MMGT1	sp|Q8N4V1|MMGT1_HUMAN Membrane magnesium transporter 1 OS=Homo sapiens (Human) OX=9606 GN=MMGT1 PE=1 SV=1;sp|Q8N4V1-2|MMGT1-2_HUMAN Isoform of Q8N4V1, Isoform 2 of Membrane magnesium transporter 1 OS=Homo sapiens (Human) OX=9606 GN=MMGT1 PE=1 SV=1	204320	124780	208720	151940	228770	148150	193160	130330	208450	158300	227610	144930	2	17.6627	17.0129	17.7114	17.2289	17.7111	17.1071	-0.578767	4.64016	3.60797	17.4057	-9.26787	2.931				keep	2			22.1	2	2	22.1	22.1	14.686	0	5.6929	127550000	3	131	2	2
Q96E39;A0A1B0GUK8	Q96E39	RNA binding motif protein, X-linked-like-1	RBMXL1	sp|Q96E39|RMXL1_HUMAN RNA binding motif protein, X-linked-like-1 OS=Homo sapiens (Human) OX=9606 GN=RBMXL1 PE=1 SV=1	1389300	823860	1341100	771320	999270	844300	1313300	862050	1337300	810200	1004200	818540	2	20.4282	19.7359	20.3951	19.5727	19.8381	19.6178	-0.578333	2.26047	1.84996	19.9313	-3.85519	-3.0555				keep	12			36.4	12	2	36.4	4.4	42.141	0	79.671	10284000000	59	390	57	56
Q6ZN17;A0A1B0GVD3;Q6ZN17-2;A0A1B0GTK2	Q6ZN17;A0A1B0GVD3;Q6ZN17-2;A0A1B0GTK2	Protein lin-28 homolog B	LIN28B	sp|Q6ZN17|LN28B_HUMAN Protein lin-28 homolog B OS=Homo sapiens (Human) OX=9606 GN=LIN28B PE=1 SV=1;tr|A0A1B0GVD3|A0A1B0GVD3_HUMAN Isoform of Q6ZN17, CCHC-type domain-containing protein OS=Homo sapiens (Human) OX=9606 GN=LIN28B PE=1 SV=1;sp|Q6ZN17-2|LN28B-2	818870	559840	898960	579280	955460	625280	774400	578710	898010	609960	948660	611460	4	19.6655	19.1785	19.8181	19.1596	19.7734	19.1845	-0.578133	5.14267	3.95546	19.4633	-10.9295	4.19571				keep	11			55.2	11	10	55.2	50.4	27.083	0	78.316	871360000	12	250	11	11
Q9UD71;J3KSJ8;J3KT77;Q9UD71-2	Q9UD71;J3KSJ8;J3KT77;Q9UD71-2	Protein phosphatase 1 regulatory subunit 1B	PPP1R1B	sp|Q9UD71|PPR1B_HUMAN Protein phosphatase 1 regulatory subunit 1B OS=Homo sapiens (Human) OX=9606 GN=PPP1R1B PE=1 SV=2;tr|J3KSJ8|J3KSJ8_HUMAN Isoform of Q9UD71, Protein phosphatase 1 regulatory subunit 1B (Fragment) OS=Homo sapiens (Human) OX=9606 GN=PPP1R	34415	21418	35488	22727	40184	29131	32536	22329	35406	24020	39920	28385	4	15.093	14.4704	15.1552	14.4878	15.2019	14.7606	-0.5771	3.78646	2.98505	14.8615	-6.9379	0.775602				keep	2			11.8	2	2	11.8	11.8	22.963	0.0022925	2.0662	22169000	2	204	2	2
P46952;C9IY88	P46952;C9IY88	3-hydroxyanthranilate 3,4-dioxygenase	HAAO	sp|P46952|3HAO_HUMAN 3-hydroxyanthranilate 3,4-dioxygenase OS=Homo sapiens (Human) OX=9606 GN=HAAO PE=1 SV=2;tr|C9IY88|C9IY88_HUMAN Isoform of P46952, 3-hydroxyanthranilate 3,4-dioxygenase (Fragment) OS=Homo sapiens (Human) OX=9606 GN=HAAO PE=1 SV=8	30641	22140	33827	23141	41155	24080	28983	22768	33880	24361	40706	23651	2	14.9254	14.5183	15.0861	14.5139	15.2364	14.4859	-0.5766	3.9814	3.13297	14.7943	-7.42336	1.26873				keep	2			12.6	2	2	12.6	12.6	32.556	0	21.176	36493000	2	286	2	2
Q9H5K3;E5RJD5	Q9H5K3	Protein O-mannose kinase	POMK	sp|Q9H5K3|SG196_HUMAN Protein O-mannose kinase OS=Homo sapiens (Human) OX=9606 GN=POMK PE=1 SV=1	537770	325580	550090	342720	469260	359960	508370	340380	548260	359030	469760	350080	2	19.0589	18.3965	19.1095	18.4024	18.7476	18.3878	-0.576433	3.48971	2.76522	18.6838	-6.24547	0.0253253				keep	8			34.6	8	8	34.6	34.6	40.05	0	34.837	385370000	15	350	14	14
Q8N4Z0	Q8N4Z0	Putative Ras-related protein Rab-42	RAB42	sp|Q8N4Z0|RAB42_HUMAN Ras-related protein Rab-42 OS=Homo sapiens (Human) OX=9606 GN=RAB42 PE=2 SV=2	74558	49700	72921	45649	81430	56477	70503	51410	73090	48326	80802	55113	1	16.2083	15.6848	16.1942	15.494	16.2208	15.7157	-0.576267	4.48945	3.5004	15.9196	-8.81828	2.5537				keep	2			17	2	2	17	17	24.133	0	11.113	39718000	2	218	2	2
P25116	P25116	Proteinase-activated receptor 1	F2R	sp|P25116|PAR1_HUMAN Proteinase-activated receptor 1 OS=Homo sapiens (Human) OX=9606 GN=F2R PE=1 SV=2	173320	99945	167420	121310	180430	125470	163820	104950	167190	126370	179840	122430	1	17.4253	16.6927	17.3933	16.9041	17.3687	16.8673	-0.5744	4.54668	3.54345	17.1086	-8.98571	2.69613				keep	3			9.6	3	3	9.6	9.6	47.44	0	5.3127	83581000	3	425	3	3
Q9NX47	Q9NX47	E3 ubiquitin-protein ligase MARCH5	MARCHF5	sp|Q9NX47|MARH5_HUMAN E3 ubiquitin-protein ligase MARCHF5 OS=Homo sapiens (Human) OX=9606 GN=MARCHF5 PE=1 SV=1	673720	416240	681960	454770	716910	506750	636930	434140	680960	477060	713720	494180	1	19.384	18.7509	19.4195	18.8105	19.359	18.8813	-0.573267	5.23284	4.01954	19.1009	-11.2524	4.42046				keep	8			39.2	8	8	39.2	39.2	31.231	0	19.114	586140000	10	278	8	8
Q9Y2S7;B4DEM9	Q9Y2S7;B4DEM9	Polymerase delta-interacting protein 2	POLDIP2	sp|Q9Y2S7|PDIP2_HUMAN Polymerase delta-interacting protein 2 OS=Homo sapiens (Human) OX=9606 GN=POLDIP2 PE=1 SV=1;tr|B4DEM9|B4DEM9_HUMAN Isoform of Q9Y2S7, ApaG domain-containing protein OS=Homo sapiens (Human) OX=9606 GN=POLDIP2 PE=1 SV=1	1569900	997320	1414200	869660	1327100	992760	1484300	1035400	1419300	915550	1324000	966310	2	20.6045	20.0116	20.4717	19.7458	20.2474	19.8514	-0.5716	3.1604	2.52098	20.1554	-5.53632	-0.805736				keep	11			43.2	11	11	43.2	43.2	42.033	0	44.478	4065200000	16	368	16	16
A0JLT2;A0A494C0G4;J3KR33;A0A494C0Y4;A0JLT2-2	A0JLT2;A0A494C0G4;J3KR33;A0A494C0Y4;A0JLT2-2	Mediator of RNA polymerase II transcription subunit 19	MED19	sp|A0JLT2|MED19_HUMAN Mediator of RNA polymerase II transcription subunit 19 OS=Homo sapiens (Human) OX=9606 GN=MED19 PE=1 SV=2;tr|A0A494C0G4|A0A494C0G4_HUMAN Isoform of A0JLT2, Mediator of RNA polymerase II transcription subunit 19 OS=Homo sapiens (Human)	55898	33862	54169	32323	45616	37016	52843	35367	54078	33994	45688	35938	5	15.7927	15.1313	15.7653	14.996	15.3848	15.1062	-0.569767	3.01168	2.41666	15.3627	-5.23445	-1.18015				keep	4			35.7	4	4	35.7	35.7	26.273	0	12.572	65371000	4	244	4	4
Q86W50;I3L362;Q86W50-2;I3L3W3;I3L4V1	Q86W50	Methyltransferase-like protein 16	METTL16	sp|Q86W50|MET16_HUMAN RNA N6-adenosine-methyltransferase METTL16 OS=Homo sapiens (Human) OX=9606 GN=METTL16 PE=1 SV=2	481120	386230	538800	324170	629130	383140	455260	393580	541030	345340	621570	375710	5	18.8983	18.643	19.0796	18.3221	19.1706	18.4779	-0.5685	3.27624	2.60429	18.7653	-5.77913	-0.513674				keep	11			22.2	11	11	22.2	22.2	63.62	0	33.47	436990000	12	562	11	11
Q9ULH0-4;Q9ULH0;Q9ULH0-2;E9PH70;A0A1W2PPB7;H0Y8E4;Q9ULH0-3;Q9ULH0-5;H7C584;A0A1W2PPY4	Q9ULH0-4;Q9ULH0;Q9ULH0-2;E9PH70;A0A1W2PPB7;H0Y8E4;Q9ULH0-3	Kinase D-interacting substrate of 220 kDa	KIDINS220	sp|Q9ULH0-4|KDIS-4_HUMAN Isoform of Q9ULH0, Isoform 4 of Kinase D-interacting substrate of 220 kDa OS=Homo sapiens (Human) OX=9606 GN=KIDINS220 PE=1 SV=3;sp|Q9ULH0|KDIS_HUMAN Kinase D-interacting substrate of 220 kDa OS=Homo sapiens (Human) OX=9606 GN=KIDI	2364800	1447200	2296100	1523500	2295600	1664100	2235600	1509900	2295500	1595800	2289300	1621500	10	21.1955	20.5487	21.1709	20.5547	21.038	20.5967	-0.5681	4.94692	3.82627	20.8508	-10.2496	3.70117				keep	45			36.7	45	45	36.7	36.7	194.57	0	275.22	2026000000	49	1752	48	48
P49006	P49006	MARCKS-related protein	MARCKSL1	sp|P49006|MRP_HUMAN MARCKS-related protein OS=Homo sapiens (Human) OX=9606 GN=MARCKSL1 PE=1 SV=2	961650	582160	970600	625380	924260	697780	909070	608490	968190	655700	923000	678990	1	19.8974	19.2349	19.9287	19.2701	19.7255	19.3428	-0.567933	4.42136	3.44925	19.5666	-8.61881	2.38091				keep	5			49.7	6	5	54.9	49.7	19.529	0	70.485	11274000000	11	195	11	11
Q9NWZ8	Q9NWZ8	Gem-associated protein 8	GEMIN8	sp|Q9NWZ8|GEMI8_HUMAN Gem-associated protein 8 OS=Homo sapiens (Human) OX=9606 GN=GEMIN8 PE=1 SV=1	131910	77566	135950	94676	125670	90415	124680	81360	135480	98420	125730	88120	1	17.0314	16.327	17.0929	16.5464	16.8469	16.3946	-0.567733	3.75672	2.96448	16.7065	-6.86603	0.700374				keep	2			9.9	2	2	9.9	9.9	28.636	0	8.0267	121530000	2	242	2	2
O95409;Q96T25;Q15915;O60481;Q8N9L1;C9JD04;Q8N9L1-2;Q8N9L1-5;Q8N9L1-3;O60481-2	O95409;Q96T25;Q15915;O60481;Q8N9L1;C9JD04;Q8N9L1-2;Q8N9L1-5;Q8N9L1-3;O60481-2	Zinc finger protein ZIC 2;Zinc finger protein ZIC 5;Zinc finger protein ZIC 1;Zinc finger protein ZIC 3;Zinc finger protein ZIC 4	ZIC2;ZIC5;ZIC1;ZIC3;ZIC4	sp|O95409|ZIC2_HUMAN Zinc finger protein ZIC 2 OS=Homo sapiens (Human) OX=9606 GN=ZIC2 PE=1 SV=2;sp|Q96T25|ZIC5_HUMAN Zinc finger protein ZIC 5 OS=Homo sapiens (Human) OX=9606 GN=ZIC5 PE=1 SV=2;sp|Q15915|ZIC1_HUMAN Zinc finger protein ZIC 1 OS=Homo sapiens	110620	62014	96195	71970	112320	78921	104550	65214	96385	74997	111830	76980	10	16.7775	16.0042	16.5938	16.1508	16.6848	16.1985	-0.567533	4.21042	3.29712	16.4016	-8.02668	1.84714				keep	2			4.1	2	2	4.1	4.1	55.005	0	4.7753	67113000	3	532	2	2
P23368;A0A1W2PPH1;A0A1W2PQH3;A0A1W2PQT3;A0A1W2PQY8;A0A1W2PQ37;A0A1W2PQF8;P23368-2;A0A1W2PR68;A0A1W2PRS2;A0A1W2PRY9;A0A1W2PQH4;A0A1W2PRH1;Q6TCH8;A0A1W2PPY2;Q16798-2	P23368;A0A1W2PPH1;A0A1W2PQH3;A0A1W2PQT3;A0A1W2PQY8;A0A1W2PQ37;A0A1W2PQF8;P23368-2;A0A1W2PR68	NAD-dependent malic enzyme, mitochondrial	ME2	sp|P23368|MAOM_HUMAN NAD-dependent malic enzyme, mitochondrial OS=Homo sapiens (Human) OX=9606 GN=ME2 PE=1 SV=1;tr|A0A1W2PPH1|A0A1W2PPH1_HUMAN Isoform of P23368, Malic enzyme OS=Homo sapiens (Human) OX=9606 GN=ME2 PE=1 SV=1;tr|A0A1W2PQH3|A0A1W2PQH3_HUMAN I	3512700	2297700	3519200	2320500	3686400	2522400	3321500	2382100	3522900	2436200	3666600	2462600	16	21.7664	21.2157	21.787	21.1617	21.7214	21.1967	-0.5669	5.5986	4.25337	21.4748	-12.6562	5.3304				keep	20			48.8	20	19	48.8	47.3	65.443	0	103.79	2994700000	45	584	37	39
Q9BZD2;A0A2R8YDR8;Q9BZD2-2	Q9BZD2;A0A2R8YDR8;Q9BZD2-2	Equilibrative nucleoside transporter 3	SLC29A3	sp|Q9BZD2|S29A3_HUMAN Equilibrative nucleoside transporter 3 OS=Homo sapiens (Human) OX=9606 GN=SLC29A3 PE=1 SV=3;tr|A0A2R8YDR8|A0A2R8YDR8_HUMAN Isoform of Q9BZD2, Equilibrative nucleoside transporter 3 OS=Homo sapiens (Human) OX=9606 GN=SLC29A3 PE=1 SV=1;	55288	40600	60480	37135	65917	43211	52299	41683	60570	39346	65340	42253	3	15.7769	15.3931	15.9243	15.1962	15.9159	15.3295	-0.5661	4.29757	3.3639	15.5893	-8.26651	2.0672				keep	2			4.8	2	2	4.8	4.8	51.814	0.0025215	2.0614	15361000	2	475	2	2
Q9P241;Q9P241-2;Q6PEW3	Q9P241;Q9P241-2	Probable phospholipid-transporting ATPase VD	ATP10D	sp|Q9P241|AT10D_HUMAN Probable phospholipid-transporting ATPase VD OS=Homo sapiens (Human) OX=9606 GN=ATP10D PE=2 SV=3;sp|Q9P241-2|AT10D-2_HUMAN Isoform of Q9P241, Isoform 2 of Probable phospholipid-transporting ATPase VD OS=Homo sapiens (Human) OX=9606 GN	13427	8765.4	13691	11426	17174	9325.9	12696	9081.6	13734	11820	17033	9161.1	3	13.7351	13.1815	13.7811	13.4958	13.9755	13.1174	-0.565667	2.99017	2.39978	13.5477	-5.19168	-1.23423				keep	3			3.8	3	3	3.8	3.8	160.27	0	21.152	11027000	3	1426	2	2
P09601;B1AHA8	P09601;B1AHA8	Heme oxygenase 1	HMOX1	sp|P09601|HMOX1_HUMAN Heme oxygenase 1 OS=Homo sapiens (Human) OX=9606 GN=HMOX1 PE=1 SV=1;tr|B1AHA8|B1AHA8_HUMAN Isoform of P09601, Heme oxygenase 1 (Fragment) OS=Homo sapiens (Human) OX=9606 GN=HMOX1 PE=1 SV=1	417000	255090	410600	284150	424890	297280	394220	266220	410440	296810	423480	290010	2	18.6919	18.0445	18.6875	18.132	18.6043	18.1118	-0.565133	5.25885	4.03574	18.3787	-11.3489	4.48649				keep	7			35.8	7	7	35.8	35.8	32.818	0	24.085	298370000	8	288	8	8
P36551;P36551-2;H0YA22;D6RER6	P36551	Oxygen-dependent coproporphyrinogen-III oxidase, mitochondrial	CPOX	sp|P36551|HEM6_HUMAN Oxygen-dependent coproporphyrinogen-III oxidase, mitochondrial OS=Homo sapiens (Human) OX=9606 GN=CPOX PE=1 SV=3	1677600	1067000	1609000	1067600	1549800	1088100	1586100	1108600	1611900	1116500	1546000	1061400	4	20.7002	20.109	20.6579	20.0417	20.4712	19.9837	-0.564967	4.19179	3.2859	20.3273	-7.97757	1.80142				keep	19			44.3	19	19	44.3	44.3	50.151	0	76.767	2947700000	24	454	23	23
Q9H8M5;Q9H8M5-2;Q9H8M5-3	Q9H8M5;Q9H8M5-2;Q9H8M5-3	Metal transporter CNNM2	CNNM2	sp|Q9H8M5|CNNM2_HUMAN Metal transporter CNNM2 OS=Homo sapiens (Human) OX=9606 GN=CNNM2 PE=1 SV=2;sp|Q9H8M5-2|CNNM2-2_HUMAN Isoform of Q9H8M5, Isoform 2 of Metal transporter CNNM2 OS=Homo sapiens (Human) OX=9606 GN=CNNM2 PE=1 SV=2;sp|Q9H8M5-3|CNNM2-3_HUMAN	156260	91558	137860	99159	143080	100590	147700	95833	138240	103220	142750	98112	3	17.2758	16.5663	17.113	16.6132	17.034	16.5485	-0.564933	4.32698	3.383	16.8585	-8.3501	2.14265				keep	7			8.8	9	7	11.4	8.8	96.622	0	15.955	98841000	7	875	5	5
Q9NVC3;H3BPV9;H3BP25;H3BMC5;Q9NVC3-2;H3BN87;H3BU46;H3BPK8	Q9NVC3;H3BPV9;H3BP25;H3BMC5;Q9NVC3-2;H3BN87;H3BU46;H3BPK8	Putative sodium-coupled neutral amino acid transporter 7	SLC38A7	sp|Q9NVC3|S38A7_HUMAN Putative sodium-coupled neutral amino acid transporter 7 OS=Homo sapiens (Human) OX=9606 GN=SLC38A7 PE=1 SV=1;tr|H3BPV9|H3BPV9_HUMAN Isoform of Q9NVC3, Aa_trans domain-containing protein (Fragment) OS=Homo sapiens (Human) OX=9606 GN=S	34750	22245	34689	24419	38113	25128	32856	23111	34726	25525	37898	24566	8	15.1069	14.5251	15.1224	14.5914	15.1256	14.5474	-0.563667	5.67162	4.29414	14.8365	-12.9558	5.51165				keep	2			5.2	2	2	5.2	5.2	49.965	0.00013057	4.3774	24293000	2	462	2	2
O60637;H0YKJ9;O60637-3;O60637-2;H0YMH8	O60637;H0YKJ9;O60637-3;O60637-2	Tetraspanin-3	TSPAN3	sp|O60637|TSN3_HUMAN Tetraspanin-3 OS=Homo sapiens (Human) OX=9606 GN=TSPAN3 PE=2 SV=1;tr|H0YKJ9|H0YKJ9_HUMAN Isoform of O60637, Tetraspanin-3 OS=Homo sapiens (Human) OX=9606 GN=TSPAN3 PE=1 SV=1;sp|O60637-3|TSN3-3_HUMAN Isoform of O60637, Isoform 3 of Tetr	160600	92436	154170	117960	173630	117140	151800	97072	154080	122320	172980	114430	5	17.3153	16.5801	17.2743	16.8637	17.3132	16.7682	-0.5636	4.05651	3.18917	17.0191	-7.61781	1.45917				keep	5			18.6	5	5	18.6	18.6	28.017	0	13.597	311770000	4	253	3	3
Q9NRN5;Q9NRN5-2;B4DNG0;Q9NRN5-3	Q9NRN5;Q9NRN5-2;B4DNG0	Olfactomedin-like protein 3	OLFML3	sp|Q9NRN5|OLFL3_HUMAN Olfactomedin-like protein 3 OS=Homo sapiens (Human) OX=9606 GN=OLFML3 PE=2 SV=1;sp|Q9NRN5-2|OLFL3-2_HUMAN Isoform of Q9NRN5, Isoform 2 of Olfactomedin-like protein 3 OS=Homo sapiens (Human) OX=9606 GN=OLFML3 PE=2 SV=1;tr|B4DNG0|B4DNG0	489260	318740	452190	304670	489050	331500	462620	330190	454240	319640	486230	323750	4	18.9225	18.3659	18.8267	18.2326	18.8072	18.269	-0.562967	4.85699	3.76439	18.5706	-9.95905	3.48046				keep	10			33.5	10	10	33.5	33.5	46.01	0	42.635	627970000	13	406	13	13
Q9NRZ5;Q9NRZ5-2;H0Y5R3	Q9NRZ5;Q9NRZ5-2	1-acyl-sn-glycerol-3-phosphate acyltransferase delta	AGPAT4	sp|Q9NRZ5|PLCD_HUMAN 1-acyl-sn-glycerol-3-phosphate acyltransferase delta OS=Homo sapiens (Human) OX=9606 GN=AGPAT4 PE=1 SV=1;sp|Q9NRZ5-2|PLCD-2_HUMAN Isoform of Q9NRZ5, Isoform 2 of 1-acyl-sn-glycerol-3-phosphate acyltransferase delta OS=Homo sapiens (Hum	154790	104540	159270	105580	163520	108700	146380	108080	159490	110700	162660	106230	3	17.2622	16.7576	17.3213	16.7037	17.2267	16.6604	-0.562833	5.23284	4.01954	16.9886	-11.2543	4.42178				keep	4			11.6	4	4	11.6	11.6	44.021	0	7.4707	70336000	4	378	4	4
Q5HY92	Q5HY92	Fidgetin	FIGN	sp|Q5HY92|FIGN_HUMAN Fidgetin OS=Homo sapiens (Human) OX=9606 GN=FIGN PE=1 SV=2	31279	22263	35722	22247	39423	26488	29584	22939	35673	23551	39099	25878	1	14.9551	14.5262	15.1647	14.457	15.1743	14.6234	-0.5625	4.00524	3.1506	14.8168	-7.48483	1.32936				keep	2			3.2	2	2	3.2	3.2	82.145	0.00012783	3.879	5913000	2	759	2	2
Q92673;E9PPB3;E9PS32;E9PP43;E9PKB0	Q92673	Sortilin-related receptor	SORL1	sp|Q92673|SORL_HUMAN Sortilin-related receptor OS=Homo sapiens (Human) OX=9606 GN=SORL1 PE=1 SV=2	1081200	680920	1082100	725310	1138200	806200	1022200	708650	1081900	760490	1133300	786150	5	20.0664	19.461	20.0856	19.484	20.0259	19.5511	-0.5606	5.40012	4.11634	19.779	-11.877	4.83827				keep	26			16.1	26	26	16.1	16.1	248.42	0	89.838	562600000	28	2214	27	27
Q96JM2-3;Q96JM2;H3BLX4;U3KQU3	Q96JM2-3;Q96JM2;H3BLX4	Zinc finger protein 462	ZNF462	sp|Q96JM2-3|ZN462-3_HUMAN Isoform of Q96JM2, Isoform 3 of Zinc finger protein 462 OS=Homo sapiens (Human) OX=9606 GN=ZNF462 PE=1 SV=3;sp|Q96JM2|ZN462_HUMAN Zinc finger protein 462 OS=Homo sapiens (Human) OX=9606 GN=ZNF462 PE=1 SV=3;tr|H3BLX4|H3BLX4_HUMAN I	1090100	716150	1094300	726690	1131600	776690	1030700	742160	1095600	762060	1126200	758210	4	20.0783	19.5338	20.1017	19.4867	20.0175	19.4973	-0.5599	5.47496	4.16431	19.7859	-12.1678	5.02557				keep	24			12.5	24	8	12.5	4.1	291.11	0	65.658	573700000	27	2566	27	27
Q68D85	Q68D85	Natural cytotoxicity triggering receptor 3 ligand 1	NCR3LG1	sp|Q68D85|NR3L1_HUMAN Natural cytotoxicity triggering receptor 3 ligand 1 OS=Homo sapiens (Human) OX=9606 GN=NCR3LG1 PE=1 SV=1	208850	132930	206920	138450	209600	147560	197470	138170	207030	144960	208860	143920	1	17.6943	17.1042	17.6989	17.0947	17.5849	17.1013	-0.5593	5.266	4.03716	17.3797	-11.3743	4.50374				keep	5			14.5	5	5	14.5	14.5	50.827	0	12.156	165300000	7	454	6	6
O15061;H0YL34;A0A075B7B1;O15061-2	O15061;H0YL34;A0A075B7B1;O15061-2	Synemin	SYNM	sp|O15061|SYNEM_HUMAN Synemin OS=Homo sapiens (Human) OX=9606 GN=SYNM PE=1 SV=2;tr|H0YL34|H0YL34_HUMAN Isoform of O15061, IF rod domain-containing protein OS=Homo sapiens (Human) OX=9606 GN=SYNM PE=1 SV=1;tr|A0A075B7B1|A0A075B7B1_HUMAN Isoform of O15061, I	16855	11227	16805	9845.9	16575	12745	15938	11617	16819	10441	16507	12395	4	14.0631	13.5386	14.0768	13.281	13.9243	13.568	-0.558867	3.60434	2.85369	13.742	-6.50659	0.315046				keep	3			1.9	3	3	1.9	1.9	172.77	0	5.1929	17451000	2	1565	2	2
P07305;P07305-2	P07305	Histone H1.0;Histone H1.0, N-terminally processed	H1F0	sp|P07305|H10_HUMAN Histone H1.0 OS=Homo sapiens (Human) OX=9606 GN=H1-0 PE=1 SV=3	1214900	907230	1411000	789430	1192000	857120	1149300	930880	1409300	835740	1188400	835380	2	20.2346	19.875	20.4685	19.6062	20.0925	19.6395	-0.5583	2.95166	2.37189	19.986	-5.11563	-1.33103				keep	7			23.7	7	5	23.7	22.7	20.863	0	10.914	2867100000	12	194	11	11
P11166;A6NL68;A0A0D9SG74;A0A0D9SFK9	P11166	Solute carrier family 2, facilitated glucose transporter member 1	SLC2A1	sp|P11166|GTR1_HUMAN Solute carrier family 2, facilitated glucose transporter member 1 OS=Homo sapiens (Human) OX=9606 GN=SLC2A1 PE=1 SV=2	1645400	989380	1568900	1108800	1638600	1158400	1555400	1033900	1569600	1156400	1634000	1129600	4	20.6722	20	20.6215	20.0963	20.5516	20.0741	-0.5583	5.04624	3.89764	20.336	-10.593	3.95461				keep	8			14	8	8	14	14	54.083	0	20.235	1987700000	14	492	14	14
Q5SXM8;Q5SXM7	Q5SXM8;Q5SXM7	DNL-type zinc finger protein	DNLZ	sp|Q5SXM8|DNLZ_HUMAN DNL-type zinc finger protein OS=Homo sapiens (Human) OX=9606 GN=DNLZ PE=1 SV=1;tr|Q5SXM7|Q5SXM7_HUMAN Isoform of Q5SXM8, DNL-type zinc finger protein OS=Homo sapiens (Human) OX=9606 GN=DNLZ PE=1 SV=1	102790	60619	94879	68396	112370	79443	97163	63449	94991	71568	111760	77473	2	16.6716	15.9714	16.574	16.0773	16.6855	16.208	-0.558133	4.21183	3.29781	16.3646	-8.031	1.85116				keep	2			12.9	2	2	12.9	12.9	19.204	0	5.066	101120000	2	178	2	2
Q9Y6M0;Q9Y6M0-3;Q9Y6M0-2;I3L0U2;I3L3C7;Q7RTY9	Q9Y6M0;Q9Y6M0-3;Q9Y6M0-2;I3L0U2	Testisin	PRSS21	sp|Q9Y6M0|TEST_HUMAN Testisin OS=Homo sapiens (Human) OX=9606 GN=PRSS21 PE=1 SV=1;sp|Q9Y6M0-3|TEST-3_HUMAN Isoform of Q9Y6M0, Isoform 3 of Testisin OS=Homo sapiens (Human) OX=9606 GN=PRSS21 PE=2 SV=1;sp|Q9Y6M0-2|TEST-2_HUMAN Isoform of Q9Y6M0, Isoform 2 of	228650	129900	216760	164170	237310	166830	216100	136580	216600	170350	236750	162720	6	17.825	17.0709	17.7659	17.3405	17.764	17.2784	-0.555033	4.02228	3.16316	17.5074	-7.5289	1.37258				keep	5			19.1	5	5	19.1	19.1	34.884	0	13.127	140940000	5	314	3	4
Q99766;A0A2R8YDJ1;A0A5K1VW60;G3V467;A0A5F9ZGZ2;A0A5K1VW82;Q99766-3;Q99766-2	Q99766;A0A2R8YDJ1;A0A5K1VW60;G3V467	ATP synthase subunit s, mitochondrial	ATP5S	sp|Q99766|ATP5S_HUMAN ATP synthase subunit s, mitochondrial OS=Homo sapiens (Human) OX=9606 GN=DMAC2L PE=1 SV=3;tr|A0A2R8YDJ1|A0A2R8YDJ1_HUMAN Isoform of Q99766, ATP synthase subunit s, mitochondrial (Fragment) OS=Homo sapiens (Human) OX=9606 GN=DMAC2L PE=	232330	158610	223080	152210	266320	173050	219710	163640	224210	160170	264020	169270	8	17.848	17.359	17.8074	17.2314	17.9304	17.3312	-0.554733	4.82391	3.74306	17.5846	-9.84792	3.39448				keep	3			14.9	3	3	14.9	14.9	24.866	0	5.4624	130860000	4	215	4	4
P78324;P78324-4;P78324-2;Q5TFQ8;Q9P1W8-4;H3BU43;H3BV43;O00241;Q9P1W8-2;Q9P1W8;Q9P1W8-3;H3BUA5;H3BRP9;H3BQ21;H3BML4;H9KV29;H3BSK5;O00241-2	P78324;P78324-4;P78324-2	Tyrosine-protein phosphatase non-receptor type substrate 1	SIRPA	sp|P78324|SHPS1_HUMAN Tyrosine-protein phosphatase non-receptor type substrate 1 OS=Homo sapiens (Human) OX=9606 GN=SIRPA PE=1 SV=2;sp|P78324-4|SHPS1-4_HUMAN Isoform of P78324, Isoform 4 of Tyrosine-protein phosphatase non-receptor type substrate 1 OS=Homo	266370	167650	253300	171840	268240	190250	251840	174350	253790	180010	267130	185510	18	18.0453	17.439	17.9907	17.4064	17.9407	17.4679	-0.554467	5.29757	4.05998	17.715	-11.4913	4.58285				keep	9			24.4	9	9	24.4	24.4	54.966	0	52.44	157140000	9	504	7	7
Q15776;Q9P2J8;Q8TF47;Q15776-2;Q9P2J8-2	Q15776	Zinc finger protein with KRAB and SCAN domains 8	ZKSCAN8	sp|Q15776|ZKSC8_HUMAN Zinc finger protein with KRAB and SCAN domains 8 OS=Homo sapiens (Human) OX=9606 GN=ZKSCAN8 PE=1 SV=2	157300	90393	150440	101040	129540	101980	148680	94937	150140	105140	130010	99102	5	17.2854	16.5478	17.239	16.6403	16.8906	16.5683	-0.552867	3.1067	2.48659	16.8619	-5.42608	-0.940994				keep	9			19.7	9	8	19.7	18.2	65.815	0	28.067	181640000	7	578	6	6
P45880;A0A0A0MR02;P45880-1;Q5JSD2;Q5JSD1;A2A3S1	P45880;A0A0A0MR02;P45880-1;Q5JSD2;Q5JSD1	Voltage-dependent anion-selective channel protein 2	VDAC2	sp|P45880|VDAC2_HUMAN Voltage-dependent anion-selective channel protein 2 OS=Homo sapiens (Human) OX=9606 GN=VDAC2 PE=1 SV=2;tr|A0A0A0MR02|A0A0A0MR02_HUMAN Isoform of P45880, Voltage-dependent anion-selective channel protein 2 (Fragment) OS=Homo sapiens (H	4453400	3065700	4303700	2847000	4661700	3115500	4211700	3160800	4324400	2992400	4631300	3044300	6	22.1087	21.6317	22.0773	21.4567	22.06	21.5014	-0.552067	4.77211	3.70896	21.806	-9.68021	3.26306				keep	15			62.2	15	3	62.2	7.5	31.566	0	234.31	43136000000	69	294	33	34
O95677;E7ESD5;E9PLN6;F2Z2Y1;O95677-5;O95677-2;O95677-4;O95677-3	O95677;E7ESD5;E9PLN6;F2Z2Y1;O95677-5;O95677-2;O95677-4;O95677-3	Eyes absent homolog 4;Eyes absent homolog	EYA4	sp|O95677|EYA4_HUMAN Eyes absent homolog 4 OS=Homo sapiens (Human) OX=9606 GN=EYA4 PE=1 SV=2;tr|E7ESD5|E7ESD5_HUMAN Isoform of O95677, Eyes absent homolog OS=Homo sapiens (Human) OX=9606 GN=EYA4 PE=1 SV=1;tr|E9PLN6|E9PLN6_HUMAN Isoform of O95677, Eyes abse	28998	15307	29743	23078	31499	23419	27402	16256	29573	23748	31513	22764	8	14.8459	13.9858	14.9004	14.5099	14.8506	14.4458	-0.5518	2.52218	2.0511	14.5897	-4.31102	-2.406				keep	2			4.7	2	2	4.7	4.7	69.504	0.00012778	3.8757	16924000	2	639	2	2
Q9NRZ9;A0A0B4J1V9;Q9NRZ9-2;Q9NRZ9-5;Q9NRZ9-4;Q9NRZ9-3;F6XU50;Q9NRZ9-6;A0A087WSW7;Q9NRZ9-7;Q9NRZ9-8;Q9NW36;B1ALG6;Q9NRZ9-9;Q76H82	Q9NRZ9;A0A0B4J1V9;Q9NRZ9-2;Q9NRZ9-5;Q9NRZ9-4;Q9NRZ9-3;F6XU50;Q9NRZ9-6;A0A087WSW7	Lymphoid-specific helicase	HELLS	sp|Q9NRZ9|HELLS_HUMAN Lymphoid-specific helicase OS=Homo sapiens (Human) OX=9606 GN=HELLS PE=1 SV=1;tr|A0A0B4J1V9|A0A0B4J1V9_HUMAN Isoform of Q9NRZ9, Helicase, lymphoid-specific, isoform CRA_b OS=Homo sapiens (Human) OX=9606 GN=HELLS PE=1 SV=1;sp|Q9NRZ9-2|	3076300	2108200	3043200	2015700	3078600	2068200	2909300	2175100	3054200	2112400	3064100	2020500	15	21.575	21.0915	21.5773	20.9586	21.4614	20.9103	-0.5511	4.44612	3.47018	21.2624	-8.69059	2.44348				keep	34			45.6	34	34	45.6	45.6	97.073	0	186.98	3309800000	56	838	49	48
P46108;P46108-2;I3L297	P46108;P46108-2	Adapter molecule crk	CRK	sp|P46108|CRK_HUMAN Adapter molecule crk OS=Homo sapiens (Human) OX=9606 GN=CRK PE=1 SV=2;sp|P46108-2|CRK-2_HUMAN Isoform of P46108, Isoform Crk-I of Adapter molecule crk OS=Homo sapiens (Human) OX=9606 GN=CRK PE=1 SV=2	746340	571190	818230	514300	1056300	669760	706100	584290	821010	548100	1043300	655740	3	19.5317	19.2075	19.6823	18.988	19.9182	19.2836	-0.551033	2.84305	2.29283	19.4352	-4.9048	-1.60372				keep	10			39.1	10	10	39.1	39.1	33.83	0	53.837	560230000	10	304	8	8
Q3ZCQ3	Q3ZCQ3	Membrane protein FAM174B	FAM174B	sp|Q3ZCQ3|F174B_HUMAN Membrane protein FAM174B OS=Homo sapiens (Human) OX=9606 GN=FAM174B PE=2 SV=2	455300	297680	445000	298650	499920	347910	430510	308510	446010	313980	496820	339470	1	18.8187	18.2673	18.8036	18.2038	18.8389	18.3387	-0.550467	5.14146	3.95538	18.5452	-10.9244	4.19207				keep	2			20.8	2	2	20.8	20.8	16.966	0	6.1869	321680000	3	159	3	3
O75820;O75820-2;O75820-3;O75820-4	O75820;O75820-2;O75820-3;O75820-4	Zinc finger protein 189	ZNF189	sp|O75820|ZN189_HUMAN Zinc finger protein 189 OS=Homo sapiens (Human) OX=9606 GN=ZNF189 PE=1 SV=2;sp|O75820-2|ZN189-2_HUMAN Isoform of O75820, Isoform 2 of Zinc finger protein 189 OS=Homo sapiens (Human) OX=9606 GN=ZNF189 PE=1 SV=2;sp|O75820-3|ZN189-3_HUMA	18742	12008	16659	10011	15233	12088	17721	12453	16732	10555	15219	11744	4	14.2162	13.6356	14.0642	13.305	13.8025	13.4916	-0.550233	2.67681	2.16906	13.7525	-4.59199	-2.02006				keep	3			7.2	3	3	7.2	7.2	72.975	0	18.982	30611000	4	626	3	3
Q7L3S4;I3L3L5;H3BRY2	Q7L3S4	Zinc finger protein 771	ZNF771	sp|Q7L3S4|ZN771_HUMAN Zinc finger protein 771 OS=Homo sapiens (Human) OX=9606 GN=ZNF771 PE=1 SV=1	131500	90453	132860	88173	142890	96157	124360	93326	133250	92620	142020	93936	3	17.0269	16.5488	17.0597	16.4438	17.0321	16.4835	-0.547533	5.32698	4.07109	16.7658	-11.5996	4.6554				keep	6			22.4	6	6	22.4	22.4	35.702	0	8.6321	90368000	6	317	5	5
O94768	O94768	Serine/threonine-protein kinase 17B	STK17B	sp|O94768|ST17B_HUMAN Serine/threonine-protein kinase 17B OS=Homo sapiens (Human) OX=9606 GN=STK17B PE=1 SV=1	6815.6	3271	5858.3	3621.9	4462.5	4621.5	6439	3504.3	5826.1	3784.4	4517.5	4457.6	1	12.7569	11.7594	12.5564	11.8383	12.0312	12.1045	-0.547433	1.75831	1.45491	12.1744	-3.03696	-4.28307				keep	2			8.1	2	2	8.1	8.1	42.344	0.0021806	2.0962	3475300	2	372	2	2
P51674;D6R9D2;P51674-3;P51674-2	P51674;D6R9D2;P51674-3;P51674-2	Neuronal membrane glycoprotein M6-a	GPM6A	sp|P51674|GPM6A_HUMAN Neuronal membrane glycoprotein M6-a OS=Homo sapiens (Human) OX=9606 GN=GPM6A PE=1 SV=2;tr|D6R9D2|D6R9D2_HUMAN Isoform of P51674, Neuronal membrane glycoprotein M6-a (Fragment) OS=Homo sapiens (Human) OX=9606 GN=GPM6A PE=1 SV=1;sp|P516	195480	112090	187880	144930	200320	139170	184760	117760	187750	150070	200050	135800	4	17.5989	16.8582	17.5596	17.1607	17.5195	17.0168	-0.547433	3.83268	3.01901	17.2856	-7.0507	0.89251				keep	2			7.6	2	2	7.6	7.6	31.209	0.00012533	3.5344	158970000	3	278	3	3
Q96C01;E7EQY1;C9J2Y4;C9JF51	Q96C01;E7EQY1	Protein FAM136A	FAM136A	sp|Q96C01|F136A_HUMAN Protein FAM136A OS=Homo sapiens (Human) OX=9606 GN=FAM136A PE=1 SV=1;tr|E7EQY1|E7EQY1_HUMAN Isoform of Q96C01, Protein FAM136A OS=Homo sapiens (Human) OX=9606 GN=FAM136A PE=1 SV=1	256790	157820	229130	159230	245130	176400	242760	164380	230020	166490	244270	171920	4	17.9925	17.3518	17.846	17.2965	17.8108	17.3589	-0.547367	4.61979	3.59456	17.6094	-9.2087	2.88228				keep	3			23.9	3	3	23.9	23.9	15.641	0	15.784	1380600000	7	138	7	7
M0R1E3;Q8WUY8	M0R1E3;Q8WUY8	N-acetyltransferase 14	NAT14	tr|M0R1E3|M0R1E3_HUMAN Isoform of Q8WUY8, N-acetyltransferase domain-containing protein (Fragment) OS=Homo sapiens (Human) OX=9606 GN=NAT14 PE=1 SV=1;sp|Q8WUY8|NAT14_HUMAN N-acetyltransferase 14 OS=Homo sapiens (Human) OX=9606 GN=NAT14 PE=1 SV=1	229930	151890	239960	174010	269050	172630	217420	157420	240170	181520	267450	168940	2	17.8331	17.2966	17.9126	17.4245	17.9451	17.3277	-0.547333	4.83863	3.75238	17.6233	-9.90184	3.43631				keep	3			28.9	3	3	28.9	28.9	17.73	0	7.0183	122940000	3	173	3	3
O43278;H3BVD9;O43278-2;H3BTQ8;H3BR01;H3BMB6;H3BSM2;H3BNW5	O43278;H3BVD9;O43278-2;H3BTQ8;H3BR01;H3BMB6	Kunitz-type protease inhibitor 1	SPINT1	sp|O43278|SPIT1_HUMAN Kunitz-type protease inhibitor 1 OS=Homo sapiens (Human) OX=9606 GN=SPINT1 PE=1 SV=2;tr|H3BVD9|H3BVD9_HUMAN Isoform of O43278, Kunitz-type protease inhibitor 1 (Fragment) OS=Homo sapiens (Human) OX=9606 GN=SPINT1 PE=1 SV=1;sp|O43278-2	275250	195730	274620	192280	324180	200220	260340	201280	276120	201690	321340	196230	8	18.0926	17.6624	18.1072	17.5686	18.214	17.5416	-0.547067	4.78252	3.71708	17.8644	-9.71655	3.29171				keep	7			15.7	7	7	15.7	15.7	58.397	0	15.173	172630000	8	529	8	8
Q9UK22;A0A286YF37;R4GNH2	Q9UK22;A0A286YF37	F-box only protein 2	FBXO2	sp|Q9UK22|FBX2_HUMAN F-box only protein 2 OS=Homo sapiens (Human) OX=9606 GN=FBXO2 PE=1 SV=2;tr|A0A286YF37|A0A286YF37_HUMAN Isoform of Q9UK22, F-box only protein 2 (Fragment) OS=Homo sapiens (Human) OX=9606 GN=FBXO2 PE=1 SV=1	175640	111900	181140	139870	223920	140080	166070	116380	181270	145650	222290	137220	3	17.4445	16.8557	17.5069	17.1094	17.6802	17.0263	-0.546733	3.55658	2.81628	17.2705	-6.39687	0.194328				keep	5			27	5	5	27	27	33.327	0	18.153	102180000	6	296	5	5
Q9UK58;Q9UK58-6;Q9UK58-4;H7C4G1;Q9UK58-5	Q9UK58;Q9UK58-6;Q9UK58-4	Cyclin-L1	CCNL1	sp|Q9UK58|CCNL1_HUMAN Cyclin-L1 OS=Homo sapiens (Human) OX=9606 GN=CCNL1 PE=1 SV=1;sp|Q9UK58-6|CCNL1-6_HUMAN Isoform of Q9UK58, Isoform 4 of Cyclin-L1 OS=Homo sapiens (Human) OX=9606 GN=CCNL1 PE=1 SV=1;sp|Q9UK58-4|CCNL1-4_HUMAN Isoform of Q9UK58, Isoform 2	230850	156280	232970	159220	266660	177620	218310	161490	233570	167210	264760	173580	5	17.8388	17.3377	17.8699	17.2964	17.9322	17.3688	-0.546	5.26201	4.03668	17.6073	-11.3605	4.49435				keep	6			12.4	6	6	12.4	12.4	59.633	0	18.112	120570000	6	526	5	5
Q5TAP6	Q5TAP6	U3 small nucleolar RNA-associated protein 14 homolog C	UTP14C	sp|Q5TAP6|UT14C_HUMAN U3 small nucleolar RNA-associated protein 14 homolog C OS=Homo sapiens (Human) OX=9606 GN=UTP14C PE=1 SV=1	9070.3	5646.2	7426.4	4129.9	7022.8	6254.7	8575.2	5866	7471.9	4398.2	7017.8	6056.3	1	13.1692	12.547	12.8986	12.0276	12.6854	12.5411	-0.545833	1.90154	1.56777	12.6448	-3.26404	-3.93606				keep	2			3.8	11	2	17.8	3.8	87.187	0	6.5221	5792900	2	766	2	2
Q9BSA4;B4DKD1;Q9BSA4-2;J3KRY9	Q9BSA4;B4DKD1;Q9BSA4-2	Protein tweety homolog 2;Protein tweety homolog	TTYH2	sp|Q9BSA4|TTYH2_HUMAN Protein tweety homolog 2 OS=Homo sapiens (Human) OX=9606 GN=TTYH2 PE=1 SV=3;tr|B4DKD1|B4DKD1_HUMAN Isoform of Q9BSA4, Protein tweety homolog OS=Homo sapiens (Human) OX=9606 GN=TTYH2 PE=1 SV=1;sp|Q9BSA4-2|TTYH2-2_HUMAN Isoform of Q9BSA	219130	129890	217520	162110	248050	173310	207130	136040	217290	168820	247070	169080	4	17.7637	17.0708	17.771	17.3223	17.8279	17.3334	-0.545367	3.87277	3.04868	17.5148	-7.1497	0.993936				keep	4			11.6	4	4	11.6	11.6	58.772	0	18.03	253330000	6	534	5	5
Q8N394;A0A0B4J253;F8VSH2	Q8N394;A0A0B4J253;F8VSH2	Transmembrane and TPR repeat-containing protein 2	TMTC2	sp|Q8N394|TMTC2_HUMAN Protein O-mannosyl-transferase TMTC2 OS=Homo sapiens (Human) OX=9606 GN=TMTC2 PE=1 SV=1;tr|A0A0B4J253|A0A0B4J253_HUMAN Isoform of Q8N394, TPR_REGION domain-containing protein OS=Homo sapiens (Human) OX=9606 GN=TMTC2 PE=1 SV=1;tr|F8VSH	220220	139640	222330	153260	231610	163600	208210	145250	222330	160190	230820	159550	3	17.7708	17.1752	17.8025	17.2413	17.7289	17.2502	-0.545167	5.32331	4.07058	17.4948	-11.5865	4.64664				keep	5			8.1	5	5	8.1	8.1	94.129	0	11.295	49899000	5	836	5	5
P13284	P13284	Gamma-interferon-inducible lysosomal thiol reductase	IFI30	sp|P13284|GILT_HUMAN Gamma-interferon-inducible lysosomal thiol reductase OS=Homo sapiens (Human) OX=9606 GN=IFI30 PE=1 SV=3	31916	19164	26922	19684	29838	20997	30171	19993	27081	20512	29732	20480	1	14.9842	14.31	14.7567	14.2804	14.7724	14.2883	-0.544867	4.21681	3.30005	14.5653	-8.04421	1.86341				keep	5			33.6	5	5	33.6	33.6	27.963	0	19.823	107810000	6	250	5	5
Q00169;F5GWE5;I3L471;I3L4U7;I3L459;I3L4H1;I3L3W1;I3L2X8;I3L4C0	Q00169;F5GWE5;I3L471;I3L4U7;I3L459;I3L4H1	Phosphatidylinositol transfer protein alpha isoform	PITPNA	sp|Q00169|PIPNA_HUMAN Phosphatidylinositol transfer protein alpha isoform OS=Homo sapiens (Human) OX=9606 GN=PITPNA PE=1 SV=2;tr|F5GWE5|F5GWE5_HUMAN Isoform of Q00169, Phosphatidylinositol transfer protein alpha isoform OS=Homo sapiens (Human) OX=9606 GN=P	305580	216750	320170	216630	406620	261890	289020	223110	321080	228830	402440	256250	9	18.2434	17.8096	18.3286	17.7406	18.5409	17.929	-0.544567	3.51464	2.78534	18.0987	-6.3016	0.0883203				keep	4			23.7	5	4	27	23.7	31.806	0	11.29	342290000	8	270	7	7
Q15629;G3XAN4;Q15629-2	Q15629;G3XAN4;Q15629-2	Translocating chain-associated membrane protein 1	TRAM1	sp|Q15629|TRAM1_HUMAN Translocating chain-associated membrane protein 1 OS=Homo sapiens (Human) OX=9606 GN=TRAM1 PE=1 SV=3;tr|G3XAN4|G3XAN4_HUMAN Isoform of Q15629, TLC domain-containing protein OS=Homo sapiens (Human) OX=9606 GN=TRAM1 PE=1 SV=1;sp|Q15629-	2052300	1133800	2127600	1554000	2035500	1559500	1939600	1197900	2116300	1610600	2040200	1516800	3	20.991	20.1966	21.061	20.5833	20.8645	20.503	-0.544533	3.00817	2.41447	20.6999	-5.22746	-1.18898				keep	6			16.6	6	6	16.6	16.6	43.071	0	52.701	630180000	5	374	4	4
Q96BS2;Q96BS2-3;E9PQ58;Q96BS2-2	Q96BS2;Q96BS2-3;E9PQ58;Q96BS2-2	Calcineurin B homologous protein 3	TESC	sp|Q96BS2|CHP3_HUMAN Calcineurin B homologous protein 3 OS=Homo sapiens (Human) OX=9606 GN=TESC PE=1 SV=3;sp|Q96BS2-3|CHP3-3_HUMAN Isoform of Q96BS2, Isoform 3 of Calcineurin B homologous protein 3 OS=Homo sapiens (Human) OX=9606 GN=TESC PE=1 SV=3;tr|E9PQ5	58351	39342	61586	39383	61243	43976	55180	40697	61578	41392	61012	42863	4	15.8547	15.3477	15.9505	15.281	15.8098	15.3548	-0.543833	4.90658	3.80029	15.5998	-10.1216	3.60465				keep	2			10.7	2	2	10.7	10.7	24.75	0	4.5565	37293000	2	214	2	2
Q495W5;Q495W5-2	Q495W5;Q495W5-2	Alpha-(1,3)-fucosyltransferase 11	FUT11	sp|Q495W5|FUT11_HUMAN Alpha-(1,3)-fucosyltransferase 11 OS=Homo sapiens (Human) OX=9606 GN=FUT11 PE=1 SV=1;sp|Q495W5-2|FUT11-2_HUMAN Isoform of Q495W5, Isoform 2 of Alpha-(1,3)-fucosyltransferase 11 OS=Homo sapiens (Human) OX=9606 GN=FUT11 PE=1 SV=1	177160	112540	177380	123420	175930	123360	167500	117020	177460	128630	175570	120330	2	17.4569	16.864	17.4767	16.9289	17.3322	16.8429	-0.543333	4.78516	3.7177	17.1503	-9.72341	3.2971				keep	6			22.6	6	6	22.6	22.6	55.815	0	22.849	149510000	8	492	8	8
Q9Y6C9	Q9Y6C9	Mitochondrial carrier homolog 2	MTCH2	sp|Q9Y6C9|MTCH2_HUMAN Mitochondrial carrier homolog 2 OS=Homo sapiens (Human) OX=9606 GN=MTCH2 PE=1 SV=1	5436700	2841100	5017600	3113300	3281800	3145700	5137400	3015300	4992700	3235900	3332100	3040000	1	22.3965	21.5219	22.2987	21.5857	21.5536	21.5153	-0.541967	1.55267	1.28967	21.812	-2.71752	-4.77552				keep	9			40.6	9	2	40.6	6.9	33.331	0	46.792	6376500000	10	303	10	10
Q14678;Q14678-2;Q5W0W3;Q5W0W2	Q14678;Q14678-2	KN motif and ankyrin repeat domain-containing protein 1	KANK1	sp|Q14678|KANK1_HUMAN KN motif and ankyrin repeat domain-containing protein 1 OS=Homo sapiens (Human) OX=9606 GN=KANK1 PE=1 SV=3;sp|Q14678-2|KANK1-2_HUMAN Isoform of Q14678, Isoform 2 of KN motif and ankyrin repeat domain-containing protein 1 OS=Homo sapie	776040	489660	796070	551360	856210	608990	733700	509710	795460	576800	852830	593770	4	19.588	18.9853	19.6427	19.0884	19.6152	19.1464	-0.541933	4.84164	3.7541	19.3443	-9.90966	3.44235				keep	18			19.8	18	18	19.8	19.8	147.29	0	43.284	473900000	19	1352	19	19
Q96LJ7;H0YNC2	Q96LJ7;H0YNC2	Dehydrogenase/reductase SDR family member 1	DHRS1	sp|Q96LJ7|DHRS1_HUMAN Dehydrogenase/reductase SDR family member 1 OS=Homo sapiens (Human) OX=9606 GN=DHRS1 PE=1 SV=1;tr|H0YNC2|H0YNC2_HUMAN Isoform of Q96LJ7, Dehydrogenase/reductase (SDR family) member 1, isoform CRA_b OS=Homo sapiens (Human) OX=9606 GN=D	323960	220550	294810	199200	328720	222870	306360	227440	296960	209200	326610	217660	2	18.3277	17.8346	18.2096	17.6196	18.2341	17.6962	-0.540333	4.22768	3.30875	17.987	-8.07487	1.8918				keep	8			33.2	8	8	33.2	33.2	33.909	0	66.167	237890000	8	313	8	8
Q9NXW2;J3KPS0;Q9NXW2-2;V9GYN7;V9GY70	Q9NXW2;J3KPS0;Q9NXW2-2;V9GYN7	DnaJ homolog subfamily B member 12	DNAJB12	sp|Q9NXW2|DJB12_HUMAN DnaJ homolog subfamily B member 12 OS=Homo sapiens (Human) OX=9606 GN=DNAJB12 PE=1 SV=5;tr|J3KPS0|J3KPS0_HUMAN Isoform of Q9NXW2, J domain-containing protein OS=Homo sapiens (Human) OX=9606 GN=DNAJB12 PE=1 SV=1;sp|Q9NXW2-2|DJB12-2_HUM	591270	387270	580800	391510	595890	421540	559080	401320	582060	409850	593770	411080	5	19.1957	18.6469	19.1878	18.5944	19.0923	18.6157	-0.5396	5.17522	3.97773	18.8888	-11.0464	4.27781				keep	10			33.9	10	10	33.9	33.9	41.859	0	33.967	538870000	11	375	10	10
P63218	P63218	Guanine nucleotide-binding protein G(I)/G(S)/G(O) subunit gamma-5	GNG5	sp|P63218|GBG5_HUMAN Guanine nucleotide-binding protein G(I)/G(S)/G(O) subunit gamma-5 OS=Homo sapiens (Human) OX=9606 GN=GNG5 PE=1 SV=3	166620	99961	155540	86155	93529	87933	157510	104450	155340	90288	94810	85020	1	17.3684	16.693	17.2871	16.4104	16.4207	16.3545	-0.539433	1.2568	1.04552	16.7557	-2.26651	-5.46835				keep	3			67.6	3	3	67.6	67.6	7.3184	0	7.4677	524510000	4	68	2	2
Q9NSC2;Q9NSC2-2;H3BSM9	Q9NSC2;Q9NSC2-2;H3BSM9	Sal-like protein 1	SALL1	sp|Q9NSC2|SALL1_HUMAN Sal-like protein 1 OS=Homo sapiens (Human) OX=9606 GN=SALL1 PE=1 SV=2;sp|Q9NSC2-2|SALL1-2_HUMAN Isoform of Q9NSC2, Isoform 2 of Sal-like protein 1 OS=Homo sapiens (Human) OX=9606 GN=SALL1 PE=1 SV=2;tr|H3BSM9|H3BSM9_HUMAN Isoform of Q9	718660	453300	699910	466010	710450	529380	679460	471470	700500	488180	708700	515320	3	19.4772	18.874	19.457	18.8457	19.346	18.9443	-0.538733	4.80967	3.73483	19.1574	-9.80397	3.36024				keep	11			8.6	12	8	9.4	6.3	140.4	0	26.127	256550000	10	1324	9	9
P53794	P53794	Sodium/myo-inositol cotransporter	SLC5A3	sp|P53794|SC5A3_HUMAN Sodium/myo-inositol cotransporter OS=Homo sapiens (Human) OX=9606 GN=SLC5A3 PE=1 SV=2	118180	71073	108300	79121	113420	81090	111710	74225	108560	82272	113220	79049	1	16.8729	16.2009	16.7648	16.2875	16.6989	16.2376	-0.536867	4.62709	3.59946	16.5104	-9.23098	2.90066				keep	6			11.4	6	6	11.4	11.4	79.693	0	17.441	167600000	6	718	6	6
Q9BUB7;Q9BUB7-2;D4PHA6;Q9BUB7-3	Q9BUB7;Q9BUB7-2	Transmembrane protein 70, mitochondrial	TMEM70	sp|Q9BUB7|TMM70_HUMAN Transmembrane protein 70, mitochondrial OS=Homo sapiens (Human) OX=9606 GN=TMEM70 PE=1 SV=2;sp|Q9BUB7-2|TMM70-2_HUMAN Isoform of Q9BUB7, Isoform 2 of Transmembrane protein 70, mitochondrial OS=Homo sapiens (Human) OX=9606 GN=TMEM70 PE	1010000	643360	974090	655160	914570	672330	954970	668390	975800	683680	914190	654790	4	19.9681	19.3792	19.9339	19.3372	19.7103	19.2892	-0.535567	3.89556	3.06541	19.603	-7.20644	1.05157				keep	7			33.5	7	7	33.5	33.5	28.969	0	25.679	1536700000	13	260	13	13
Q13332;Q13332-6;Q13332-3;Q13332-4;Q13332-2;G8JL96;A0A0A0MR60;Q13332-7;Q13332-5	Q13332;Q13332-6;Q13332-3;Q13332-4;Q13332-2;G8JL96;A0A0A0MR60;Q13332-7;Q13332-5	Receptor-type tyrosine-protein phosphatase S;Protein-tyrosine-phosphatase	PTPRS	sp|Q13332|PTPRS_HUMAN Receptor-type tyrosine-protein phosphatase S OS=Homo sapiens (Human) OX=9606 GN=PTPRS PE=1 SV=3;sp|Q13332-6|PTPRS-6_HUMAN Isoform of Q13332, Isoform 2 of Receptor-type tyrosine-protein phosphatase S OS=Homo sapiens (Human) OX=9606 GN=	525340	327480	510210	338890	475570	362930	496660	341010	510450	354000	475700	353030	9	19.0251	18.4049	19.0009	18.3862	18.7669	18.3997	-0.534033	3.9445	3.1055	18.664	-7.32949	1.17538				keep	17			12.6	23	13	16.6	10.3	217.04	0	49.264	1208100000	15	1948	14	14
P12235;V9GYG0;Q9H0C2	P12235;V9GYG0	ADP/ATP translocase 1	SLC25A4	sp|P12235|ADT1_HUMAN ADP/ATP translocase 1 OS=Homo sapiens (Human) OX=9606 GN=SLC25A4 PE=1 SV=4;tr|V9GYG0|V9GYG0_HUMAN Isoform of P12235, ADP/ATP translocase 1 OS=Homo sapiens (Human) OX=9606 GN=SLC25A4 PE=1 SV=1	947980	614040	903730	627160	954580	671020	896340	636740	906700	655470	951050	654510	3	19.8767	19.3119	19.8257	19.2742	19.7721	19.2864	-0.534	5.25104	4.03527	19.5578	-11.32	4.46676				keep	5			17.1	12	5	43	17.1	33.064	0	15.647	2589000000	14	298	11	11
Q96N66;Q96N66-2;Q96N66-3;M0R1Z5;A9C4B8	Q96N66;Q96N66-2;Q96N66-3	Lysophospholipid acyltransferase 7	MBOAT7	sp|Q96N66|MBOA7_HUMAN Lysophospholipid acyltransferase 7 OS=Homo sapiens (Human) OX=9606 GN=MBOAT7 PE=1 SV=2;sp|Q96N66-2|MBOA7-2_HUMAN Isoform of Q96N66, Isoform 2 of Lysophospholipid acyltransferase 7 OS=Homo sapiens (Human) OX=9606 GN=MBOAT7 PE=1 SV=2;sp	450030	292700	419920	293070	443990	309090	425520	303300	421790	306140	442320	301580	5	18.8019	18.243	18.7199	18.1766	18.6677	18.168	-0.533967	4.90658	3.79894	18.4628	-10.1146	3.59936				keep	5			12.3	5	5	12.3	12.3	52.764	0	35.66	617730000	6	472	6	6
Q96EH3	Q96EH3	Mitochondrial assembly of ribosomal large subunit protein 1	MALSU1	sp|Q96EH3|MASU1_HUMAN Mitochondrial assembly of ribosomal large subunit protein 1 OS=Homo sapiens (Human) OX=9606 GN=MALSU1 PE=1 SV=1	66685	41590	60602	40574	56228	42591	63040	43264	60803	42343	56254	41394	1	16.0473	15.4278	15.9272	15.324	15.6866	15.3086	-0.533567	3.29202	2.61569	15.6202	-5.81275	-0.473855				keep	4			34.6	4	4	34.6	34.6	26.17	0	14.635	67336000	4	234	3	4
Q8WWI1;J3KP06;F8WD26;Q8WWI1-3;Q8WWI1-2;Q8WWI1-4;E9PMS6;E9PMP7;E9PMT2;A0A0A0MTE2;Q8WWI1-5;H0Y424;H0YDQ3;H0YDG6;H0YE95;E9PLU6;E9PJ10;E9PK58;U3KQE6	Q8WWI1;J3KP06;F8WD26;Q8WWI1-3;Q8WWI1-2;Q8WWI1-4;E9PMS6;E9PMP7;E9PMT2;A0A0A0MTE2;Q8WWI1-5;H0Y424	LIM domain only protein 7	LMO7	sp|Q8WWI1|LMO7_HUMAN LIM domain only protein 7 OS=Homo sapiens (Human) OX=9606 GN=LMO7 PE=1 SV=3;tr|J3KP06|J3KP06_HUMAN Isoform of Q8WWI1, LIM domain only protein 7 OS=Homo sapiens (Human) OX=9606 GN=LMO7 PE=1 SV=2;tr|F8WD26|F8WD26_HUMAN Isoform of Q8WWI1,	2320700	1485700	2254900	1537200	2302200	1668500	2194200	1542900	2258900	1607200	2296100	1625700	19	21.1684	20.5866	21.1448	20.5676	21.0422	20.6005	-0.533567	5.05552	3.89933	20.8517	-10.624	3.97716				keep	36			27.5	36	36	27.5	27.5	192.69	0	195.09	2115200000	39	1683	38	38
Q9H8H3;F8VQX6;H0YI09	Q9H8H3;F8VQX6;H0YI09	Methyltransferase-like protein 7A	METTL7A	sp|Q9H8H3|MET7A_HUMAN Methyltransferase-like protein 7A OS=Homo sapiens (Human) OX=9606 GN=METTL7A PE=1 SV=1;tr|F8VQX6|F8VQX6_HUMAN Isoform of Q9H8H3, Methyltransf_11 domain-containing protein (Fragment) OS=Homo sapiens (Human) OX=9606 GN=METTL7A PE=1 SV=1	1070200	704930	1011500	736640	1118600	738680	1012000	729680	1016500	767730	1113100	722120	3	20.0517	19.511	19.9882	19.5063	20.0008	19.425	-0.5328	5.19997	3.99503	19.7472	-11.1343	4.33902				keep	3			17.2	3	3	17.2	17.2	28.319	0	15.832	827940000	5	244	5	5
Q9H7Z3;H0YJT0;H0YJT6	Q9H7Z3	Protein NRDE2 homolog	NRDE2	sp|Q9H7Z3|NRDE2_HUMAN Nuclear exosome regulator NRDE2 OS=Homo sapiens (Human) OX=9606 GN=NRDE2 PE=1 SV=3	291050	185010	294420	208360	304630	214820	275180	192400	294510	217190	303840	209510	3	18.1731	17.5811	18.2077	17.6844	18.1243	17.6431	-0.532167	5.08197	3.9159	17.9023	-10.7161	4.04361				keep	11			13.4	11	11	13.4	13.4	132.67	0	45.73	198000000	12	1164	11	11
P43007;P43007-2	P43007;P43007-2	Neutral amino acid transporter A	SLC1A4	sp|P43007|SATT_HUMAN Neutral amino acid transporter A OS=Homo sapiens (Human) OX=9606 GN=SLC1A4 PE=1 SV=1;sp|P43007-2|SATT-2_HUMAN Isoform of P43007, Isoform 2 of Neutral amino acid transporter A OS=Homo sapiens (Human) OX=9606 GN=SLC1A4 PE=1 SV=1	718250	450550	704720	506960	705490	496250	679060	468940	705550	526970	704580	484030	2	19.4764	18.8652	19.4669	18.9672	19.3358	18.8511	-0.531867	4.5544	3.54986	19.1604	-9.00829	2.71517				keep	6			17.9	6	6	17.9	17.9	55.722	0	42.644	369780000	6	532	6	6
P19544-7;H0Y7K5;A0A0A0MT54;H0Y3F0;J3KNN9;A0A1W2PQQ0;P19544-8;P19544;P19544-4;P19544-2;H0YED9;P19544-6;P19544-3	P19544-7;H0Y7K5;A0A0A0MT54;H0Y3F0;J3KNN9;A0A1W2PQQ0;P19544-8	Wilms tumor protein	WT1	sp|P19544-7|WT1-7_HUMAN Isoform of P19544, Isoform 7 of Wilms tumor protein OS=Homo sapiens (Human) OX=9606 GN=WT1 PE=1 SV=2;tr|H0Y7K5|H0Y7K5_HUMAN Isoform of P19544, Wilms tumor protein OS=Homo sapiens (Human) OX=9606 GN=WT1 PE=1 SV=2;tr|A0A0A0MT54|A0A0A0	106430	73372	105890	70869	112060	77139	100660	75669	106290	74332	111490	75253	13	16.7218	16.2468	16.7324	16.1286	16.6815	16.1655	-0.5316	5.08778	3.91996	16.4461	-10.736	4.05795				keep	5			13.2	5	5	13.2	13.2	56.882	0	25.124	59024000	5	522	5	5
Q8TBP6	Q8TBP6	Solute carrier family 25 member 40	SLC25A40	sp|Q8TBP6|S2540_HUMAN Solute carrier family 25 member 40 OS=Homo sapiens (Human) OX=9606 GN=SLC25A40 PE=1 SV=1	61108	38452	55761	42717	63273	41698	57774	39965	56044	44361	63000	40766	1	15.9213	15.3147	15.8071	15.3982	15.8569	15.2781	-0.531433	4.81531	3.73641	15.596	-9.81701	3.37041				keep	2			8.3	2	2	8.3	8.3	38.124	0	7.4433	31225000	2	338	2	2
P48067-2;P48067;P48067-3;B7Z589;J3KPA5;B7Z3A9	P48067-2;P48067;P48067-3;B7Z589	Sodium- and chloride-dependent glycine transporter 1;Transporter	SLC6A9	sp|P48067-2|SC6A9-2_HUMAN Isoform of P48067, Isoform GlyT-1A of Sodium- and chloride-dependent glycine transporter 1 OS=Homo sapiens (Human) OX=9606 GN=SLC6A9 PE=1 SV=3;sp|P48067|SC6A9_HUMAN Sodium- and chloride-dependent glycine transporter 1 OS=Homo sapi	81735	53260	86430	66535	88681	56297	77284	55285	86477	68799	88492	55116	6	16.3409	15.7846	16.4394	16.0375	16.3439	15.7111	-0.530333	3.44444	2.73319	16.1096	-6.14446	-0.0890343				keep	5			10.4	5	5	10.4	10.4	70.582	0	7.1708	62359000	3	633	3	3
O00461;F8W785	O00461;F8W785	Golgi integral membrane protein 4	GOLIM4	sp|O00461|GOLI4_HUMAN Golgi integral membrane protein 4 OS=Homo sapiens (Human) OX=9606 GN=GOLIM4 PE=1 SV=1;tr|F8W785|F8W785_HUMAN Isoform of O00461, Golgi integral membrane protein 4 OS=Homo sapiens (Human) OX=9606 GN=GOLIM4 PE=1 SV=1	1399000	912340	1372800	924600	1399900	1015300	1322900	945840	1375600	967800	1395900	989290	2	20.4382	19.8831	20.4289	19.8342	20.3245	19.8838	-0.530167	5.03386	3.88831	20.1321	-10.549	3.92257				keep	15			27.6	15	14	27.6	26.3	81.879	0	43.232	1360800000	15	696	14	14
P19367;P19367-4;P19367-2;P19367-3;B1AR62	P19367;P19367-4;P19367-2;P19367-3	Hexokinase-1	HK1	sp|P19367|HXK1_HUMAN Hexokinase-1 OS=Homo sapiens (Human) OX=9606 GN=HK1 PE=1 SV=3;sp|P19367-4|HXK1-4_HUMAN Isoform of P19367, Isoform 4 of Hexokinase-1 OS=Homo sapiens (Human) OX=9606 GN=HK1 PE=1 SV=3;sp|P19367-2|HXK1-2_HUMAN Isoform of P19367, Isoform 2	3447200	2185800	3203500	2239200	3187600	2293900	3259200	2270700	3214800	2333300	3183100	2235600	5	21.7392	21.1436	21.6514	21.1103	21.5116	21.0597	-0.529533	4.2161	3.30005	21.3693	-8.0422	1.86155				keep	30			40.2	30	27	40.2	36.8	102.48	0	123.06	4741700000	37	917	37	37
O95210	O95210	Starch-binding domain-containing protein 1	STBD1	sp|O95210|STBD1_HUMAN Starch-binding domain-containing protein 1 OS=Homo sapiens (Human) OX=9606 GN=STBD1 PE=1 SV=1	698530	437100	660200	472410	662900	472400	660400	454800	661880	491360	662080	460560	1	19.4362	18.8215	19.3727	18.8654	19.246	18.78	-0.529333	4.46344	3.48153	19.087	-8.7422	2.4882				keep	8			31.6	8	8	31.6	31.6	39.007	0	46.256	215970000	7	358	7	7
Q9H2F5;A0A590UJN0;Q9H2F5-2;Q9H2F5-3;A0A590UJ87;A0A590UJ89;E9PBA8	Q9H2F5;A0A590UJN0;Q9H2F5-2;Q9H2F5-3	Enhancer of polycomb homolog 1	EPC1	sp|Q9H2F5|EPC1_HUMAN Enhancer of polycomb homolog 1 OS=Homo sapiens (Human) OX=9606 GN=EPC1 PE=1 SV=1;tr|A0A590UJN0|A0A590UJN0_HUMAN Isoform of Q9H2F5, Enhancer of polycomb homolog OS=Homo sapiens (Human) OX=9606 GN=EPC1 PE=1 SV=1;sp|Q9H2F5-2|EPC1-2_HUMAN	178100	108120	169420	114730	156790	121730	168360	112860	169490	119590	157010	118350	7	17.4646	16.8062	17.4104	16.8236	17.166	16.8237	-0.529167	3.69688	2.92177	17.0824	-6.72317	0.549044				keep	6			9.9	8	6	12.4	9.9	93.462	0	13.979	80261000	6	836	5	5
Q53GG5-2;Q53GG5;A0A087WYF8;A0A2U3TZH4;Q53GG5-3;A0A2R8Y6L7;D6RAF1	Q53GG5-2;Q53GG5;A0A087WYF8;A0A2U3TZH4	PDZ and LIM domain protein 3	PDLIM3	sp|Q53GG5-2|PDLI3-2_HUMAN Isoform of Q53GG5, Isoform 2 of PDZ and LIM domain protein 3 OS=Homo sapiens (Human) OX=9606 GN=PDLIM3 PE=1 SV=1;sp|Q53GG5|PDLI3_HUMAN PDZ and LIM domain protein 3 OS=Homo sapiens (Human) OX=9606 GN=PDLIM3 PE=1 SV=1;tr|A0A087WYF8|	598150	423430	614600	420150	723160	479420	565740	435800	616880	441760	717490	468600	7	19.2124	18.7757	19.2695	18.6963	19.3715	18.8013	-0.5267	4.5784	3.5671	19.0211	-9.08326	2.77806				keep	9			43	9	9	43	43	34.279	0	26.129	396090000	11	316	8	8
Q9NRA2;Q9NRA2-2	Q9NRA2;Q9NRA2-2	Sialin	SLC17A5	sp|Q9NRA2|S17A5_HUMAN Sialin OS=Homo sapiens (Human) OX=9606 GN=SLC17A5 PE=1 SV=2;sp|Q9NRA2-2|S17A5-2_HUMAN Isoform of Q9NRA2, Isoform 2 of Sialin OS=Homo sapiens (Human) OX=9606 GN=SLC17A5 PE=1 SV=2	53455	32910	50710	37363	55590	39407	50535	34303	50815	38890	55428	38426	2	15.7283	15.0901	15.6701	15.205	15.6701	15.1965	-0.525633	4.96257	3.83909	15.4267	-10.3024	3.74062				keep	2			4.2	2	2	4.2	4.2	54.639	0	6.0995	45963000	2	495	2	2
O00746;H0Y6J0;Q4TT34;F2Z2X0;A0A087WVT9;O00746-2;A2IDC9	O00746;H0Y6J0;Q4TT34;F2Z2X0;A0A087WVT9;O00746-2	Nucleoside diphosphate kinase, mitochondrial;Nucleoside diphosphate kinase	NME4	sp|O00746|NDKM_HUMAN Nucleoside diphosphate kinase, mitochondrial OS=Homo sapiens (Human) OX=9606 GN=NME4 PE=1 SV=1;tr|H0Y6J0|H0Y6J0_HUMAN Isoform of O00746, NDK domain-containing protein (Fragment) OS=Homo sapiens (Human) OX=9606 GN=NME4 PE=1 SV=1;tr|Q4TT	693030	462160	683070	480840	679510	465700	655340	478100	685300	500670	677970	454650	7	19.4248	18.9019	19.4218	18.8909	19.2817	18.7594	-0.525367	4.31876	3.37785	19.1134	-8.32597	2.12093				keep	3			24.6	3	3	24.6	24.6	20.658	0.00013024	4.3232	377440000	5	187	5	5
Q5T749	Q5T749	Keratinocyte proline-rich protein	KPRP	sp|Q5T749|KPRP_HUMAN Keratinocyte proline-rich protein OS=Homo sapiens (Human) OX=9606 GN=KPRP PE=1 SV=1	17045	10385	19394	26018	27981	11016	16113	10798	19485	26076	27913	11038	1	14.0793	13.4261	14.2835	14.6829	14.6797	13.3577	-0.525267	0.779123	0.644732	14.0849	-1.53326	-6.52332				keep	2			3.1	2	2	3.1	3.1	64.135	0.0001228	3.1186	25206000	2	579	2	1
Q96B45;A0A0B4J1R7	Q96B45;A0A0B4J1R7	UPF0693 protein C10orf32	C10orf32;C10orf32-ASMT	sp|Q96B45|BORC7_HUMAN BLOC-1-related complex subunit 7 OS=Homo sapiens (Human) OX=9606 GN=BORCS7 PE=3 SV=2;tr|A0A0B4J1R7|A0A0B4J1R7_HUMAN BORCS7-ASMT readthrough, BORCS7-ASMT readthrough (NMD candidate) OS=Homo sapiens (Human) OX=9606 GN=BORCS7-ASMT PE=4 S	66000	40052	65123	44809	62926	48703	62393	41837	65068	46715	62963	47354	2	16.0324	15.3735	16.031	15.4672	15.849	15.5021	-0.5232	4.14509	3.25229	15.7092	-7.85164	1.68307				keep	3			45.3	3	3	45.3	45.3	11.695	0	10.637	78436000	4	106	3	3
Q86VU5;R4GNF4	Q86VU5;R4GNF4	Catechol O-methyltransferase domain-containing protein 1	COMTD1	sp|Q86VU5|CMTD1_HUMAN Catechol O-methyltransferase domain-containing protein 1 OS=Homo sapiens (Human) OX=9606 GN=COMTD1 PE=1 SV=1;tr|R4GNF4|R4GNF4_HUMAN Isoform of Q86VU5, Catechol O-methyltransferase domain-containing protein 1 (Fragment) OS=Homo sapiens	118580	75999	109560	79337	127560	88840	112110	78856	110070	82917	126890	86682	2	16.8777	16.2976	16.7815	16.2914	16.8684	16.3693	-0.5231	5.00393	3.86733	16.581	-10.4468	3.84765				keep	5			24.8	5	5	24.8	24.8	28.808	0	35.337	226920000	6	262	4	4
Q96AG3;Q96AG3-3;E7EVY2;Q96AG3-2;B7Z6C8	Q96AG3;Q96AG3-3;E7EVY2;Q96AG3-2	Solute carrier family 25 member 46	SLC25A46	sp|Q96AG3|S2546_HUMAN Solute carrier family 25 member 46 OS=Homo sapiens (Human) OX=9606 GN=SLC25A46 PE=1 SV=1;sp|Q96AG3-3|S2546-3_HUMAN Isoform of Q96AG3, Isoform 3 of Solute carrier family 25 member 46 OS=Homo sapiens (Human) OX=9606 GN=SLC25A46 PE=1 SV=	611130	388520	592160	428220	645060	453820	577800	403750	593520	446370	642860	442640	5	19.2433	18.6515	19.2158	18.7237	19.2067	18.7221	-0.522833	5.32057	4.07058	18.9605	-11.5766	4.64009				keep	7			27.5	7	7	27.5	27.5	46.173	0	29.173	433880000	9	418	9	9
Q86WA8;Q86WA8-2;E7EN44;H3BQ67;H3BUW8;H3BPF7	Q86WA8;Q86WA8-2;E7EN44	Lon protease homolog 2, peroxisomal	LONP2	sp|Q86WA8|LONP2_HUMAN Lon protease homolog 2, peroxisomal OS=Homo sapiens (Human) OX=9606 GN=LONP2 PE=1 SV=1;sp|Q86WA8-2|LONP2-2_HUMAN Isoform of Q86WA8, Isoform 2 of Lon protease homolog 2, peroxisomal OS=Homo sapiens (Human) OX=9606 GN=LONP2 PE=1 SV=1;tr	564760	379640	550520	379720	617710	431110	534060	392360	552640	398100	614330	420610	6	19.1295	18.6182	19.1106	18.5503	19.1441	18.6481	-0.522533	5.2233	4.01368	18.8668	-11.2179	4.39677				keep	11			19	11	11	19	19	94.615	0	42.048	245100000	11	852	11	11
Q7Z4S6;Q7Z4S6-5;A0A1B0GV47;Q7Z4S6-6;Q7Z4S6-3;Q7Z4S6-2;Q7Z4S6-4;H0YHT2;H0YIM7;H0YIM6;H0YI78;O75037;O75037-2;H0YHG9;O75037-3;O75037-4	Q7Z4S6;Q7Z4S6-5;A0A1B0GV47;Q7Z4S6-6;Q7Z4S6-3;Q7Z4S6-2;Q7Z4S6-4	Kinesin-like protein KIF21A	KIF21A	sp|Q7Z4S6|KI21A_HUMAN Kinesin-like protein KIF21A OS=Homo sapiens (Human) OX=9606 GN=KIF21A PE=1 SV=2;sp|Q7Z4S6-5|KI21A-5_HUMAN Isoform of Q7Z4S6, Isoform 5 of Kinesin-like protein KIF21A OS=Homo sapiens (Human) OX=9606 GN=KIF21A PE=1 SV=2;tr|A0A1B0GV47|A0	753930	523060	775250	526110	885480	610030	713020	539370	777380	552890	879680	595440	16	19.5463	19.0805	19.6045	19.0207	19.6637	19.1489	-0.521467	4.7122	3.6615	19.3441	-9.49175	3.1129				keep	18			13.4	18	17	13.4	12.7	187.18	0	39.628	453960000	17	1674	17	17
Q10472;K7EJV8	Q10472	Polypeptide N-acetylgalactosaminyltransferase 1;Polypeptide N-acetylgalactosaminyltransferase 1 soluble form	GALNT1	sp|Q10472|GALT1_HUMAN Polypeptide N-acetylgalactosaminyltransferase 1 OS=Homo sapiens (Human) OX=9606 GN=GALNT1 PE=1 SV=1	520700	301590	503170	357930	494620	389580	492170	316530	502440	372260	495330	378580	2	19.0123	18.2861	18.9809	18.465	18.8235	18.5019	-0.521233	3.73156	2.94453	18.6783	-6.80569	0.63674				keep	10			22.9	10	9	22.9	21.1	64.218	0	58.038	284590000	11	559	11	11
Q8IZJ1;Q8IZJ1-2	Q8IZJ1;Q8IZJ1-2	Netrin receptor UNC5B	UNC5B	sp|Q8IZJ1|UNC5B_HUMAN Netrin receptor UNC5B OS=Homo sapiens (Human) OX=9606 GN=UNC5B PE=1 SV=2;sp|Q8IZJ1-2|UNC5B-2_HUMAN Isoform of Q8IZJ1, Isoform 2 of Netrin receptor UNC5B OS=Homo sapiens (Human) OX=9606 GN=UNC5B PE=1 SV=2	56167	33858	58494	41744	60284	45540	53096	35425	58337	43477	60239	44312	2	15.7997	15.1311	15.8762	15.365	15.7871	15.4052	-0.520567	3.699	2.92355	15.5607	-6.7282	0.554412				keep	2			2.2	2	2	2.2	2.2	103.64	0	4.8475	20855000	2	945	2	2
P50895;A0A087WXM8;K7ENU8	P50895;A0A087WXM8;K7ENU8	Basal cell adhesion molecule	BCAM	sp|P50895|BCAM_HUMAN Basal cell adhesion molecule OS=Homo sapiens (Human) OX=9606 GN=BCAM PE=1 SV=2;tr|A0A087WXM8|A0A087WXM8_HUMAN Isoform of P50895, Basal cell adhesion molecule OS=Homo sapiens (Human) OX=9606 GN=BCAM PE=1 SV=1;tr|K7ENU8|K7ENU8_HUMAN Isof	1986600	1271000	1939100	1347200	2057000	1503800	1878300	1320100	1942600	1408300	2051000	1464800	3	20.9441	20.3614	20.9271	20.3773	20.8797	20.4505	-0.520567	5.13966	3.95538	20.6567	-10.9196	4.18867				keep	17			33.4	17	17	33.4	33.4	67.404	0	68.303	1334100000	21	628	21	21
Q16762;B1AH48	Q16762	Thiosulfate sulfurtransferase	TST	sp|Q16762|THTR_HUMAN Thiosulfate sulfurtransferase OS=Homo sapiens (Human) OX=9606 GN=TST PE=1 SV=4	473410	297470	434960	306940	440650	323130	447580	309250	436590	319790	440100	314730	2	18.875	18.2663	18.7707	18.2433	18.6569	18.2321	-0.5203	4.34199	3.39259	18.5074	-8.39116	2.17947				keep	6			28.3	6	6	28.3	28.3	33.429	0	25.094	383270000	6	297	6	6
Q8N4Q0;Q8N4Q0-2;J3KTQ8;J3QQQ7	Q8N4Q0;Q8N4Q0-2;J3KTQ8	Zinc-binding alcohol dehydrogenase domain-containing protein 2	ZADH2	sp|Q8N4Q0|PTGR3_HUMAN Prostaglandin reductase 3 OS=Homo sapiens (Human) OX=9606 GN=ZADH2 PE=1 SV=1;sp|Q8N4Q0-2|PTGR3-2_HUMAN Isoform of Q8N4Q0, Isoform 2 of Prostaglandin reductase 3 OS=Homo sapiens (Human) OX=9606 GN=ZADH2 PE=1 SV=1;tr|J3KTQ8|J3KTQ8_HUMAN	490100	307930	483630	335250	464500	347120	463360	320480	483920	349170	464570	337880	4	18.9249	18.3161	18.9237	18.3706	18.7329	18.3354	-0.5198	4.28651	3.35674	18.6006	-8.23721	2.0406				keep	7			22.3	7	7	22.3	22.3	40.14	0	18.891	300620000	7	377	7	7
P15927;P15927-2;P15927-3;Q5TEJ7;Q5TEJ0	P15927;P15927-2;P15927-3;Q5TEJ7	Replication protein A 32 kDa subunit	RPA2	sp|P15927|RFA2_HUMAN Replication protein A 32 kDa subunit OS=Homo sapiens (Human) OX=9606 GN=RPA2 PE=1 SV=1;sp|P15927-2|RFA2-2_HUMAN Isoform of P15927, Isoform 2 of Replication protein A 32 kDa subunit OS=Homo sapiens (Human) OX=9606 GN=RPA2 PE=1 SV=1;sp|P	496360	263530	481560	293730	320120	321920	469050	279400	478510	305950	325100	310730	5	18.9433	18.0915	18.9175	18.1798	18.1958	18.2267	-0.519533	1.6027	1.32841	18.4258	-2.79464	-4.65642				keep	8			65.9	8	8	65.9	65.9	29.247	0	58.095	1332800000	19	270	17	17
Q04837;A0A0G2JLD8;E7EUY5;C9K0U8	Q04837;A0A0G2JLD8;E7EUY5;C9K0U8	Single-stranded DNA-binding protein, mitochondrial	SSBP1	sp|Q04837|SSBP_HUMAN Single-stranded DNA-binding protein, mitochondrial OS=Homo sapiens (Human) OX=9606 GN=SSBP1 PE=1 SV=1;tr|A0A0G2JLD8|A0A0G2JLD8_HUMAN Isoform of Q04837, Single-stranded DNA-binding protein, mitochondrial (Fragment) OS=Homo sapiens (Huma	2327600	1594600	2245300	1597500	2215500	1480300	2201200	1644800	2257600	1661200	2210500	1446500	4	21.1726	20.6887	21.1386	20.6231	20.9868	20.4278	-0.519467	3.53579	2.80041	20.8396	-6.34951	0.141776				keep	8			48	8	8	48	48	17.259	0	57.286	1893400000	18	148	17	17
Q15120;Q15120-2;REV__P78559;REV__P78559-2;REV__E9PGC8	Q15120;Q15120-2	[Pyruvate dehydrogenase (acetyl-transferring)] kinase isozyme 3, mitochondrial	PDK3	sp|Q15120|PDK3_HUMAN [Pyruvate dehydrogenase (acetyl-transferring)] kinase isozyme 3, mitochondrial OS=Homo sapiens (Human) OX=9606 GN=PDK3 PE=1 SV=1;sp|Q15120-2|PDK3-2_HUMAN Isoform of Q15120, Isoform 2 of [Pyruvate dehydrogenase (acetyl-transferring)] ki	653820	400930	604380	404450	562140	446710	618100	417900	605520	422180	562980	433980	5	19.3408	18.6969	19.2453	18.6413	19.0081	18.6993	-0.5189	3.45303	2.73916	18.9386	-6.16352	-0.0673564				keep	9			33	9	9	33	33	46.938	0	70.237	470440000	10	406	10	10
Q14690;A0A3B3IUD7;S4R3Q4	Q14690;A0A3B3IUD7	Protein RRP5 homolog	PDCD11	sp|Q14690|RRP5_HUMAN Protein RRP5 homolog OS=Homo sapiens (Human) OX=9606 GN=PDCD11 PE=1 SV=3;tr|A0A3B3IUD7|A0A3B3IUD7_HUMAN Isoform of Q14690, Programmed cell death 11, isoform CRA_a OS=Homo sapiens (Human) OX=9606 GN=PDCD11 PE=1 SV=1	8346800	5821200	8275100	5567400	8375500	5829000	7894000	5996500	8311900	5825900	8345300	5687600	3	23.015	22.5568	23.0205	22.4243	22.9053	22.4052	-0.518167	4.41229	3.44231	22.7212	-8.59139	2.35688				keep	58			34.8	58	58	34.8	34.8	208.7	0	315.04	10334000000	81	1871	77	77
Q9NQC3;Q9NQC3-4;Q9NQC3-6;A0A0U1RQR6;H7C106;Q9NQC3-3;C9J685	Q9NQC3;Q9NQC3-4;Q9NQC3-6	Reticulon-4	RTN4	sp|Q9NQC3|RTN4_HUMAN Reticulon-4 OS=Homo sapiens (Human) OX=9606 GN=RTN4 PE=1 SV=2;sp|Q9NQC3-4|RTN4-4_HUMAN Isoform of Q9NQC3, Isoform 6 of Reticulon-4 OS=Homo sapiens (Human) OX=9606 GN=RTN4 PE=1 SV=2;sp|Q9NQC3-6|RTN4-6_HUMAN Isoform of Q9NQC3, Isoform D	2355200	1440800	2412200	1550100	2095500	1741700	2226500	1504600	2405800	1620300	2102600	1689700	7	21.1896	20.5423	21.2421	20.5797	20.9064	20.6624	-0.5179	3.25638	2.58944	20.8538	-5.73702	-0.563754				keep	29			45.2	29	21	45.2	30.6	129.93	0	158.55	4396800000	38	1192	34	35
Q9H425;Q9H425-3;Q9H425-2;E5RI90;E5RFY9	Q9H425;Q9H425-3;Q9H425-2;E5RI90	Uncharacterized protein C1orf198	C1orf198	sp|Q9H425|CA198_HUMAN Uncharacterized protein C1orf198 OS=Homo sapiens (Human) OX=9606 GN=C1orf198 PE=1 SV=1;sp|Q9H425-3|CA198-3_HUMAN Isoform of Q9H425, Isoform 3 of Uncharacterized protein C1orf198 OS=Homo sapiens (Human) OX=9606 GN=C1orf198 PE=1 SV=1;sp	806480	537150	825180	551200	815630	599130	762620	556060	826080	576710	813990	583520	5	19.6435	19.1189	19.6945	19.0879	19.5451	19.1229	-0.5178	4.82391	3.74306	19.3688	-9.84835	3.39482				keep	11			43.7	11	11	43.7	43.7	36.346	0	81.796	591240000	12	327	12	12
P51151;Q9NP90;A0A1B0GUI0	P51151	Ras-related protein Rab-9A	RAB9A	sp|P51151|RAB9A_HUMAN Ras-related protein Rab-9A OS=Homo sapiens (Human) OX=9606 GN=RAB9A PE=1 SV=1	1005400	674910	995850	707950	1079800	739960	950780	697790	999290	738960	1075200	722400	3	19.9616	19.4482	19.9657	19.449	19.9499	19.4275	-0.5175	5.56225	4.23359	19.7003	-12.5114	5.24121				keep	8			55.7	8	8	55.7	55.7	22.837	0	36.462	904560000	9	201	9	9
F2Z2B0;Q9Y5J6	F2Z2B0;Q9Y5J6	Mitochondrial import inner membrane translocase subunit Tim10 B	TIMM10B	tr|F2Z2B0|F2Z2B0_HUMAN Isoform of Q9Y5J6, Mitochondrial import inner membrane translocase subunit Tim10 B OS=Homo sapiens (Human) OX=9606 GN=TIMM10B PE=1 SV=1;sp|Q9Y5J6|T10B_HUMAN Mitochondrial import inner membrane translocase subunit Tim10 B OS=Homo sapi	30723	20452	30914	17661	25353	21844	29052	21168	30920	18641	25419	21171	2	14.9293	14.4038	14.9561	14.124	14.5374	14.3453	-0.516567	2.44398	1.99146	14.5493	-4.17234	-2.6006				keep	2			47.9	2	2	47.9	47.9	7.7277	0	6.1609	141430000	2	71	2	2
Q9BZF1;Q9BZF1-3;Q9BZF1-2;F8VQX7;F8VUA7;F8VZ43;F8VVD3;F8VVE7;Q9H0X9;Q9H0X9-3;Q9H0X9-2;F8VZB8	Q9BZF1;Q9BZF1-3;Q9BZF1-2;F8VQX7;F8VUA7	Oxysterol-binding protein-related protein 8;Oxysterol-binding protein	OSBPL8	sp|Q9BZF1|OSBL8_HUMAN Oxysterol-binding protein-related protein 8 OS=Homo sapiens (Human) OX=9606 GN=OSBPL8 PE=1 SV=3;sp|Q9BZF1-3|OSBL8-3_HUMAN Isoform of Q9BZF1, Isoform 3 of Oxysterol-binding protein-related protein 8 OS=Homo sapiens (Human) OX=9606 GN=O	1300400	856770	1248400	847430	1212800	888560	1229600	887030	1252800	884690	1211300	865480	12	20.3328	19.7924	20.2918	19.7085	20.1175	19.6915	-0.516567	4.08249	3.2043	19.9891	-7.68493	1.52401				keep	23			32.8	23	23	32.8	32.8	101.19	0	113.95	1356400000	27	889	24	24
Q9HD47;Q9HD47-2;Q9HD47-4;Q9HD47-3	Q9HD47;Q9HD47-2	Ran guanine nucleotide release factor	RANGRF	sp|Q9HD47|MOG1_HUMAN Ran guanine nucleotide release factor OS=Homo sapiens (Human) OX=9606 GN=RANGRF PE=1 SV=1;sp|Q9HD47-2|MOG1-2_HUMAN Isoform of Q9HD47, Isoform 2 of Ran guanine nucleotide release factor OS=Homo sapiens (Human) OX=9606 GN=RANGRF PE=1 SV=	35071	25980	37783	27464	47320	28795	33176	26646	37947	28778	46871	28237	4	15.1202	14.749	15.2456	14.761	15.4377	14.7439	-0.516533	3.61872	2.86296	15.0096	-6.53989	0.351392				keep	3			21.5	3	3	21.5	21.5	20.448	0	16.55	117770000	3	186	2	2
O60256;O60256-2;O60256-3;O60256-4;E7EPA1;C9K0K7;C9JDU5;C9JJS3;I3L0S1;C9JDH0;E7EW35;I3L331;I3L164;I3L4G9;I3L3B8;I3L2J4;I3L1T1	O60256;O60256-2;O60256-3;O60256-4;E7EPA1;C9K0K7;C9JDU5;C9JJS3;I3L0S1	Phosphoribosyl pyrophosphate synthase-associated protein 2	PRPSAP2	sp|O60256|KPRB_HUMAN Phosphoribosyl pyrophosphate synthase-associated protein 2 OS=Homo sapiens (Human) OX=9606 GN=PRPSAP2 PE=1 SV=1;sp|O60256-2|KPRB-2_HUMAN Isoform of O60256, Isoform 2 of Phosphoribosyl pyrophosphate synthase-associated protein 2 OS=Homo	1868900	1244500	1966300	1328700	2043500	1489300	1767300	1288900	1966500	1391500	2037000	1450900	17	20.856	20.331	20.9472	20.3573	20.8702	20.4366	-0.516167	4.88606	3.78441	20.633	-10.0478	3.54848				keep	9			35.2	10	9	39	35.2	40.925	0	26.688	1209300000	12	369	12	12
Q9UPT9;Q9UPT9-2;Q70EK9;A6NNY8;A0A1B0GVA6	Q9UPT9;Q9UPT9-2	Ubiquitin carboxyl-terminal hydrolase 22	USP22	sp|Q9UPT9|UBP22_HUMAN Ubiquitin carboxyl-terminal hydrolase 22 OS=Homo sapiens (Human) OX=9606 GN=USP22 PE=1 SV=2;sp|Q9UPT9-2|UBP22-2_HUMAN Isoform of Q9UPT9, Isoform 2 of Ubiquitin carboxyl-terminal hydrolase 22 OS=Homo sapiens (Human) OX=9606 GN=USP22 PE	279110	228690	325510	219540	356860	212060	264130	232780	326950	230380	353800	208150	5	18.1127	17.8869	18.3525	17.7598	18.3526	17.6245	-0.515533	3.2437	2.58221	18.0148	-5.71023	-0.59574				keep	6			16.2	6	6	16.2	16.2	59.96	0	31.103	266610000	5	525	5	5
Q14CN4;CON__sp|Q14CN4|K2C72_HUMAN;CON__sp|Q6IME9|K2C72_MOUSE;Q14CN4-3;Q14CN4-2;Q3SY84;Q7RTS7;CON__sp|Q3SY84|K2C71_HUMAN;CON__sp|Q7RTS7|K2C74_HUMAN;F8W1S1;Q86Y46;H0YIG3;CON__sp|Q86Y46|K2C73_HUMAN;Q86Y46-2	Q14CN4;CON__sp|Q14CN4|K2C72_HUMAN;CON__sp|Q6IME9|K2C72_MOUSE;Q14CN4-3;Q14CN4-2;Q3SY84;Q7RTS7;CON__sp|Q3SY84|K2C71_HUMAN;CON__sp|Q7RTS7|K2C74_HUMAN;F8W1S1	Keratin, type II cytoskeletal 72;Keratin, type II cytoskeletal 71;Keratin, type II cytoskeletal 74	KRT72;KRT71;KRT74	sp|Q14CN4|K2C72_HUMAN Keratin, type II cytoskeletal 72 OS=Homo sapiens (Human) OX=9606 GN=KRT72 PE=1 SV=2;;;sp|Q14CN4-3|K2C72-3_HUMAN Isoform of Q14CN4, Isoform 3 of Keratin, type II cytoskeletal 72 OS=Homo sapiens (Human) OX=9606 GN=KRT72 PE=2 SV=2;sp|Q14	163310	101720	120280	137680	207250	95497	154390	105530	122800	140620	205030	94843	14	17.3395	16.7181	16.9162	17.0867	17.5686	16.4735	-0.515333	1.50149	1.2471	17.0171	-2.63896	-4.89685			+	keep	3			6.7	4	1	8.4	2.3	55.877	0	4.7517	74179000	3	511	3	3
Q9BXP2;C9JBD8;Q9BXP2-2;Q9BXP2-3;Q9BXP2-4;C9JMQ7;C9J0I5	Q9BXP2	Solute carrier family 12 member 9	SLC12A9	sp|Q9BXP2|S12A9_HUMAN Solute carrier family 12 member 9 OS=Homo sapiens (Human) OX=9606 GN=SLC12A9 PE=1 SV=1	537140	347570	574460	396310	585910	431620	507880	360950	573640	413790	584780	420290	7	19.0572	18.4908	19.172	18.612	19.0679	18.6498	-0.514833	4.40121	3.4359	18.8416	-8.56092	2.33012				keep	11			20.8	11	10	20.8	19.6	96.109	0	44.276	309780000	11	914	11	10
O75629;A0A3B3IRL2	O75629;A0A3B3IRL2	Protein CREG1	CREG1	sp|O75629|CREG1_HUMAN Protein CREG1 OS=Homo sapiens (Human) OX=9606 GN=CREG1 PE=1 SV=1;tr|A0A3B3IRL2|A0A3B3IRL2_HUMAN Isoform of O75629, Cellular repressor of E1A-stimulated genes 1, isoform CRA_a OS=Homo sapiens (Human) OX=9606 GN=CREG1 PE=1 SV=1	107620	64186	113230	64853	79450	76505	101730	67246	112590	68071	80270	73925	2	16.7378	16.0539	16.8291	16.0006	16.1853	16.1536	-0.5147	1.92315	1.58375	16.3267	-3.29868	-3.88347				keep	3			20.9	3	3	20.9	20.9	24.074	0	7.15	47274000	5	220	3	3
Q9UQE7	Q9UQE7	Structural maintenance of chromosomes protein 3	SMC3	sp|Q9UQE7|SMC3_HUMAN Structural maintenance of chromosomes protein 3 OS=Homo sapiens (Human) OX=9606 GN=SMC3 PE=1 SV=2	7954500	5509900	7721000	5294000	8387700	5811100	7522900	5677800	7761800	5545800	8345800	5671000	1	22.9456	22.4775	22.9205	22.3516	22.9074	22.4007	-0.514567	4.98297	3.85563	22.6672	-10.3825	3.8002				keep	49			43.9	49	49	43.9	43.9	141.54	0	309.27	14720000000	73	1217	69	69
O95379;D6RCM8;O95379-3;O95379-2;O95379-4;J3KQT8;E5RIJ3	O95379;D6RCM8;O95379-3;O95379-2;O95379-4	Tumor necrosis factor alpha-induced protein 8	TNFAIP8	sp|O95379|TFIP8_HUMAN Tumor necrosis factor alpha-induced protein 8 OS=Homo sapiens (Human) OX=9606 GN=TNFAIP8 PE=1 SV=1;tr|D6RCM8|D6RCM8_HUMAN Isoform of O95379, Tumor necrosis factor alpha-induced protein 8 OS=Homo sapiens (Human) OX=9606 GN=TNFAIP8 PE=1	37990	20374	36971	28756	44567	35161	35901	21576	36846	29906	44498	34167	7	15.2356	14.3983	15.2143	14.8273	15.3513	15.0321	-0.5145	2.06472	1.69802	15.0098	-3.52847	-3.53746				keep	3			19.2	3	3	19.2	19.2	23.003	0	17.023	32107000	3	198	2	2
Q6P597;Q6P597-2;Q6P597-3;K7EL76;K7ENJ3;K7ELP9	Q6P597;Q6P597-2;Q6P597-3;K7EL76	Kinesin light chain 3	KLC3	sp|Q6P597|KLC3_HUMAN Kinesin light chain 3 OS=Homo sapiens (Human) OX=9606 GN=KLC3 PE=1 SV=2;sp|Q6P597-2|KLC3-2_HUMAN Isoform of Q6P597, Isoform 2 of Kinesin light chain 3 OS=Homo sapiens (Human) OX=9606 GN=KLC3 PE=1 SV=2;sp|Q6P597-3|KLC3-3_HUMAN Isoform o	730310	508610	778830	555750	933290	618470	690700	524570	780350	582330	926490	604520	6	19.5004	19.0401	19.6111	19.0998	19.7395	19.1687	-0.514133	3.93338	3.09825	19.3599	-7.3014	1.14726				keep	9			22	11	9	26.6	22	55.364	0	31.589	391800000	9	504	9	9
Q969Y2;Q969Y2-3;Q969Y2-4;Q969Y2-2;M0R0S9	Q969Y2;Q969Y2-3;Q969Y2-4;Q969Y2-2	tRNA modification GTPase GTPBP3, mitochondrial	GTPBP3	sp|Q969Y2|GTPB3_HUMAN tRNA modification GTPase GTPBP3, mitochondrial OS=Homo sapiens (Human) OX=9606 GN=GTPBP3 PE=1 SV=2;sp|Q969Y2-3|GTPB3-3_HUMAN Isoform of Q969Y2, Isoform 3 of tRNA modification GTPase GTPBP3, mitochondrial OS=Homo sapiens (Human) OX=960	832250	547990	801340	572830	873160	611980	786950	567410	804460	597760	869850	596980	5	19.6889	19.1477	19.6522	19.1435	19.6435	19.1535	-0.5133	5.47496	4.16431	19.4049	-12.1654	5.02403				keep	8			24	8	8	24	24	52.058	0	18.682	504990000	8	492	8	8
Q9BSH5	Q9BSH5	Haloacid dehalogenase-like hydrolase domain-containing protein 3	HDHD3	sp|Q9BSH5|HDHD3_HUMAN Haloacid dehalogenase-like hydrolase domain-containing protein 3 OS=Homo sapiens (Human) OX=9606 GN=HDHD3 PE=1 SV=1	53345	36866	53684	36886	50047	34788	50450	38018	53879	38402	50006	33946	1	15.7253	15.2539	15.7524	15.1865	15.5186	15.0167	-0.513067	3.39189	2.69573	15.4089	-6.02865	-0.221756				keep	3			23.5	3	3	23.5	23.5	28	0	18.25	67145000	3	251	3	3
Q8WUN7	Q8WUN7	Ubiquitin domain-containing protein 2	UBTD2	sp|Q8WUN7|UBTD2_HUMAN Ubiquitin domain-containing protein 2 OS=Homo sapiens (Human) OX=9606 GN=UBTD2 PE=1 SV=2	145480	90714	149820	99600	135580	108030	137540	94551	149550	103920	135870	104950	1	17.1727	16.5529	17.233	16.6196	16.9564	16.6514	-0.512733	3.67949	2.90864	16.8643	-6.68206	0.505055				keep	5			28.2	5	3	28.2	17.9	26.189	0	23.074	82311000	5	234	5	5
Q86VZ4;Q5VYB9;Q86VZ4-2	Q86VZ4;Q5VYB9;Q86VZ4-2	Low-density lipoprotein receptor-related protein 11	LRP11	sp|Q86VZ4|LRP11_HUMAN Low-density lipoprotein receptor-related protein 11 OS=Homo sapiens (Human) OX=9606 GN=LRP11 PE=2 SV=2;tr|Q5VYB9|Q5VYB9_HUMAN Isoform of Q86VZ4, Low-density lipoprotein receptor-related protein 11 OS=Homo sapiens (Human) OX=9606 GN=LR	12650	7943.5	12256	8938.7	16551	11938	11960	8265.3	12279	9400.1	16424	11634	3	13.6491	13.0394	13.6214	13.1416	13.9222	13.4736	-0.5127	2.39312	1.95384	13.4746	-4.0833	-2.72695				keep	2			5.4	2	2	5.4	5.4	53.311	0	5.1304	13561000	2	500	2	2
Q8N350;A0A140LJL2;Q8N350-4;K7ELJ5	Q8N350;A0A140LJL2;Q8N350-4	Protein Dos	DOS	sp|Q8N350|CBARP_HUMAN Voltage-dependent calcium channel beta subunit-associated regulatory protein OS=Homo sapiens (Human) OX=9606 GN=CBARP PE=1 SV=3;tr|A0A140LJL2|A0A140LJL2_HUMAN Isoform of Q8N350, Voltage-dependent calcium channel beta subunit-associate	68256	44709	71143	51512	70598	49276	64540	46374	71184	53495	70525	48075	4	16.0809	15.5322	16.1586	15.6683	16.0149	15.519	-0.511633	4.30539	3.36972	15.829	-8.28953	2.08804				keep	6			20.1	6	6	20.1	20.1	73.928	0	21.492	71183000	6	705	5	5
P63241;I3L397;I3L504;P63241-2;Q6IS14;Q9GZV4;F8WCJ1;C9J7B5;C9J4W5	P63241;I3L397;I3L504;P63241-2;Q6IS14	Eukaryotic translation initiation factor 5A-1;Eukaryotic translation initiation factor 5A;Eukaryotic translation initiation factor 5A-1-like	EIF5A;EIF5AL1	sp|P63241|IF5A1_HUMAN Eukaryotic translation initiation factor 5A-1 OS=Homo sapiens (Human) OX=9606 GN=EIF5A PE=1 SV=2;tr|I3L397|I3L397_HUMAN Isoform of P63241, Eukaryotic translation initiation factor 5A (Fragment) OS=Homo sapiens (Human) OX=9606 GN=EIF5A	3226700	2445800	3613900	2472800	4105200	2629300	3052600	2504800	3624600	2595500	4073700	2573200	9	21.6439	21.3058	21.8253	21.2534	21.8766	21.2566	-0.51	4.05502	3.18856	21.5269	-7.61381	1.45529				keep	11			64.3	11	11	64.3	64.3	16.832	0	119.42	43648000000	29	154	12	12
Q587I9	Q587I9	Vesicle transport protein SFT2C	SFT2D3	sp|Q587I9|SFT2C_HUMAN Vesicle transport protein SFT2C OS=Homo sapiens (Human) OX=9606 GN=SFT2D3 PE=2 SV=1	608020	415110	593450	417980	658930	456070	575000	428390	596240	437120	655700	445090	1	19.236	18.747	19.2189	18.6888	19.2373	18.7293	-0.509033	5.38934	4.11126	18.9762	-11.8359	4.81143				keep	3			22.3	3	3	22.3	22.3	21.789	0	13.022	701830000	3	215	3	3
Q08345;Q08345-2;A0A0A0MSX3;A0A0G2JNZ7;Q08345-5;Q08345-6;A0A0G2JI85;H0Y9F4;Q08345-4;H0YAH6;E7EPN2;A0A140T972;A2ABM8;E7EPH4;E7EQ30;A0A0G2JIZ7;A2ABL2;E7EN94;E7EUP7;E7ERI6;A0A0G2JIA2;E7ENJ2;E7EVT1;E7ES06;E7ETX3;E7EUD5;E7ETI3;E7EVW6;A0A0G2JHK4;E7ESR9;A2ABL0;E7ERN0	Q08345;Q08345-2;A0A0A0MSX3;A0A0G2JNZ7;Q08345-5;Q08345-6;A0A0G2JI85;H0Y9F4	Epithelial discoidin domain-containing receptor 1	DDR1	sp|Q08345|DDR1_HUMAN Epithelial discoidin domain-containing receptor 1 OS=Homo sapiens (Human) OX=9606 GN=DDR1 PE=1 SV=1;sp|Q08345-2|DDR1-2_HUMAN Isoform of Q08345, Isoform 2 of Epithelial discoidin domain-containing receptor 1 OS=Homo sapiens (Human) OX=9	433910	300160	436390	306660	494960	338990	410360	309440	438120	321060	492140	330950	32	18.7493	18.2793	18.7754	18.242	18.8245	18.3012	-0.5089	5.19791	3.99413	18.5286	-11.1279	4.33452				keep	6			8.4	6	6	8.4	8.4	101.13	0	10.602	129620000	6	913	6	5
P27037;P27037-2	P27037;P27037-2	Activin receptor type-2A	ACVR2A	sp|P27037|AVR2A_HUMAN Activin receptor type-2A OS=Homo sapiens (Human) OX=9606 GN=ACVR2A PE=1 SV=1;sp|P27037-2|AVR2A-2_HUMAN Isoform of P27037, Isoform 2 of Activin receptor type-2A OS=Homo sapiens (Human) OX=9606 GN=ACVR2A PE=1 SV=1	771340	537870	785540	524350	824940	590150	729510	554300	788040	549990	821520	575280	2	19.5792	19.1208	19.6235	19.0159	19.5615	19.1011	-0.5088	4.98297	3.85308	19.3337	-10.37	3.79092				keep	5			12.1	5	5	12.1	12.1	57.847	0	5.6639	222320000	5	513	5	5
O94813;A0A087WYV5;X6R3P0;O94813-3;O94813-2;E9PCX4;H0Y9Z6	O94813;A0A087WYV5;X6R3P0;O94813-3;O94813-2	Slit homolog 2 protein;Slit homolog 2 protein N-product;Slit homolog 2 protein C-product	SLIT2	sp|O94813|SLIT2_HUMAN Slit homolog 2 protein OS=Homo sapiens (Human) OX=9606 GN=SLIT2 PE=1 SV=1;tr|A0A087WYV5|A0A087WYV5_HUMAN Isoform of O94813, Slit homolog 2 protein OS=Homo sapiens (Human) OX=9606 GN=SLIT2 PE=1 SV=1;tr|X6R3P0|X6R3P0_HUMAN Isoform of O9	62382	38718	59246	45198	65261	45939	58976	40323	59410	46905	65112	44807	7	15.9511	15.3246	15.8946	15.4797	15.9015	15.4178	-0.508367	4.68194	3.63932	15.6616	-9.39714	3.0365				keep	4			3.8	4	4	3.8	3.8	169.87	0	10.38	21336000	4	1529	4	4
O75376;O75376-2;A0A088AWL3;E7EVK1;O75376-3;J3QKP0;E7EVU5;J3KS29;E7EW50;J3KS51;J3KRE4	O75376;O75376-2;A0A088AWL3	Nuclear receptor corepressor 1	NCOR1	sp|O75376|NCOR1_HUMAN Nuclear receptor corepressor 1 OS=Homo sapiens (Human) OX=9606 GN=NCOR1 PE=1 SV=2;sp|O75376-2|NCOR1-2_HUMAN Isoform of O75376, Isoform 2 of Nuclear receptor corepressor 1 OS=Homo sapiens (Human) OX=9606 GN=NCOR1 PE=1 SV=2;tr|A0A088AWL	1185600	779370	1150700	799600	1217200	888220	1121100	807000	1154400	835590	1213700	865260	11	20.1994	19.6558	20.1742	19.6246	20.1227	19.6909	-0.508333	5.15927	3.96484	19.9113	-10.9877	4.23669				keep	31			16.1	31	31	16.1	16.1	270.21	0	78.667	887700000	34	2440	33	32
Q9UHE8;Q6NZ63;Q6NZ63-2;C9JL51;C9JE84	Q9UHE8;Q6NZ63;Q6NZ63-2;C9JL51;C9JE84	Metalloreductase STEAP1;STEAP family member 1B	STEAP1;STEAP1B	sp|Q9UHE8|STEA1_HUMAN Metalloreductase STEAP1 OS=Homo sapiens (Human) OX=9606 GN=STEAP1 PE=2 SV=1;sp|Q6NZ63|STEAL_HUMAN STEAP family member 1B OS=Homo sapiens (Human) OX=9606 GN=STEAP1B PE=2 SV=1;sp|Q6NZ63-2|STEAL-2_HUMAN Isoform of Q6NZ63, Isoform 2 of ST	107200	66842	107180	79288	112420	81380	101350	69636	107230	82359	112290	79298	5	16.7322	16.1124	16.7498	16.2905	16.6861	16.2428	-0.507467	4.45967	3.47992	16.469	-8.73118	2.47867				keep	2			5	2	2	5	5	39.851	0.00012674	3.7431	33602000	2	339	2	2
P17706;P17706-2;P17706-3;P17706-4;K7EQG9;K7ER87;A0A2R8YD79;D3DUJ3;K7EIE9;K7ERU1;K7ELS9;K7EIY0;K7ENP9	P17706;P17706-2;P17706-3;P17706-4;K7EQG9;K7ER87;A0A2R8YD79;D3DUJ3	Tyrosine-protein phosphatase non-receptor type 2;Tyrosine-protein phosphatase non-receptor type;Protein-tyrosine-phosphatase	PTPN2	sp|P17706|PTN2_HUMAN Tyrosine-protein phosphatase non-receptor type 2 OS=Homo sapiens (Human) OX=9606 GN=PTPN2 PE=1 SV=2;sp|P17706-2|PTN2-2_HUMAN Isoform of P17706, Isoform 2 of Tyrosine-protein phosphatase non-receptor type 2 OS=Homo sapiens (Human) OX=96	408780	252660	423050	292730	395180	308650	386450	263610	422260	304640	395930	300010	13	18.6632	18.0307	18.7306	18.1749	18.4997	18.166	-0.5073	3.78705	2.98505	18.3775	-6.93934	0.777102				keep	9			26.7	9	9	26.7	26.7	48.473	0	22.984	384720000	13	415	12	12
Q7Z449;E9PGH5;Q7Z449-2	Q7Z449;E9PGH5	Cytochrome P450 2U1	CYP2U1	sp|Q7Z449|CP2U1_HUMAN Cytochrome P450 2U1 OS=Homo sapiens (Human) OX=9606 GN=CYP2U1 PE=1 SV=1;tr|E9PGH5|E9PGH5_HUMAN Isoform of Q7Z449, Cytochrome P450 2U1 OS=Homo sapiens (Human) OX=9606 GN=CYP2U1 PE=1 SV=1	73227	50153	74272	54034	81481	54640	69251	51771	74536	56304	81121	53385	3	16.1823	15.6979	16.2207	15.7373	16.2218	15.668	-0.5072	5.27409	4.04144	15.9547	-11.4055	4.52491				keep	3			6.4	3	3	6.4	6.4	61.986	0	5.9696	37777000	3	544	3	3
Q8IZR5;Q8IZR5-2;J3QRP2;Q8IZR5-3	Q8IZR5;Q8IZR5-2;J3QRP2;Q8IZR5-3	CKLF-like MARVEL transmembrane domain-containing protein 4	CMTM4	sp|Q8IZR5|CKLF4_HUMAN CKLF-like MARVEL transmembrane domain-containing protein 4 OS=Homo sapiens (Human) OX=9606 GN=CMTM4 PE=1 SV=1;sp|Q8IZR5-2|CKLF4-2_HUMAN Isoform of Q8IZR5, Isoform 2 of CKLF-like MARVEL transmembrane domain-containing protein 4 OS=Homo	13873	9094.3	14322	8755.2	13164	10978	13118	9430.7	14310	9217.2	13171	10650	4	13.7822	13.2346	13.8461	13.1116	13.5919	13.3527	-0.5071	3.33548	2.65118	13.4865	-5.90604	-0.364181				keep	2			18.8	2	2	18.8	18.8	25.827	0	16.142	33167000	2	234	2	2
Q5T9L3-2;Q5T9L3;Q5T9L3-3;E9PM62;E9PKJ0;E9PJW4;H0YCG9;Q7Z430;E9PQK1;E9PM23;H0YDL2	Q5T9L3-2;Q5T9L3;Q5T9L3-3;E9PM62	Protein wntless homolog	WLS	sp|Q5T9L3-2|WLS-2_HUMAN Isoform of Q5T9L3, Isoform 2 of Protein wntless homolog OS=Homo sapiens (Human) OX=9606 GN=WLS PE=1 SV=2;sp|Q5T9L3|WLS_HUMAN Protein wntless homolog OS=Homo sapiens (Human) OX=9606 GN=WLS PE=1 SV=2;sp|Q5T9L3-3|WLS-3_HUMAN Isoform of	719990	480350	719070	510390	782610	552650	680840	497000	721100	532940	779660	538960	11	19.4798	18.9576	19.4959	18.977	19.4855	19.0064	-0.506733	5.42481	4.13194	19.2337	-11.9712	4.89945				keep	8			16.2	8	8	16.2	16.2	62.551	0	17.693	361860000	8	543	5	5
Q6NUS6;A0A0C4DFN5;Q6NUS6-2;Q6NUS6-5;Q6NUS6-4;Q6NUS6-3	Q6NUS6;A0A0C4DFN5;Q6NUS6-2;Q6NUS6-5;Q6NUS6-4;Q6NUS6-3	Tectonic-3	TCTN3	sp|Q6NUS6|TECT3_HUMAN Tectonic-3 OS=Homo sapiens (Human) OX=9606 GN=TCTN3 PE=1 SV=2;tr|A0A0C4DFN5|A0A0C4DFN5_HUMAN Isoform of Q6NUS6, DUF1619 domain-containing protein OS=Homo sapiens (Human) OX=9606 GN=TCTN3 PE=1 SV=1;sp|Q6NUS6-2|TECT3-2_HUMAN Isoform of	61605	40118	64036	47023	62686	43947	58251	41635	64076	48749	62677	42870	6	15.933	15.3758	16.0068	15.5368	15.8434	15.3538	-0.5056	3.98068	3.13264	15.6749	-7.4215	1.26689				keep	6			15.7	6	6	15.7	15.7	66.156	0	44.608	155670000	6	607	4	4
Q69YQ0;Q69YQ0-2;A0A494C1J1;F8WAN1;C9J8U1;C9JLY8	Q69YQ0;Q69YQ0-2;A0A494C1J1;F8WAN1;C9J8U1	Cytospin-A	SPECC1L;SPECC1L-ADORA2A	sp|Q69YQ0|CYTSA_HUMAN Cytospin-A OS=Homo sapiens (Human) OX=9606 GN=SPECC1L PE=1 SV=2;sp|Q69YQ0-2|CYTSA-2_HUMAN Isoform of Q69YQ0, Isoform 2 of Cytospin-A OS=Homo sapiens (Human) OX=9606 GN=SPECC1L PE=1 SV=2;tr|A0A494C1J1|A0A494C1J1_HUMAN Isoform of Q69YQ0	1777700	1274000	1823700	1182300	1837600	1330400	1681500	1309700	1830500	1241600	1831000	1296300	6	20.7838	20.3648	20.8386	20.1889	20.717	20.2738	-0.503967	4.30016	3.36559	20.5278	-8.27393	2.07393				keep	25			25.7	25	25	25.7	25.7	124.6	0	101.81	1549900000	32	1117	29	29
Q96E11;Q96E11-3;Q96E11-8;Q96E11-2;X6RDS5;Q96E11-7;Q96E11-5;Q96E11-6;Q96E11-4	Q96E11;Q96E11-3;Q96E11-8;Q96E11-2	Ribosome-recycling factor, mitochondrial	MRRF	sp|Q96E11|RRFM_HUMAN Ribosome-recycling factor, mitochondrial OS=Homo sapiens (Human) OX=9606 GN=MRRF PE=1 SV=1;sp|Q96E11-3|RRFM-3_HUMAN Isoform of Q96E11, Isoform 3 of Ribosome-recycling factor, mitochondrial OS=Homo sapiens (Human) OX=9606 GN=MRRF PE=1 S	1464100	1065900	1336400	915400	1386400	935950	1384900	1092500	1350400	957150	1380300	914160	9	20.5038	20.1075	20.3901	19.8198	20.3105	19.7664	-0.503567	2.99905	2.40712	20.1497	-5.20931	-1.21191				keep	8			40.5	8	8	40.5	40.5	29.277	0	55.219	1378400000	11	262	11	11
Q10471;Q10471-2	Q10471	Polypeptide N-acetylgalactosaminyltransferase 2;Polypeptide N-acetylgalactosaminyltransferase 2 soluble form	GALNT2	sp|Q10471|GALT2_HUMAN Polypeptide N-acetylgalactosaminyltransferase 2 OS=Homo sapiens (Human) OX=9606 GN=GALNT2 PE=1 SV=1	1705700	1152200	1653200	1151900	1751000	1252800	1613000	1190200	1660500	1203600	1745200	1221200	2	20.7242	20.2199	20.697	20.1513	20.6473	20.1871	-0.5034	5.12033	3.9414	20.4378	-10.8499	4.13929				keep	21			46.1	21	20	46.1	46.1	64.732	0	81.24	2433500000	31	571	29	29
Q6UWZ7;D6REL5;Q6UWZ7-2;A0A087WZ78;A0A087WWJ9	Q6UWZ7;D6REL5;Q6UWZ7-2;A0A087WZ78;A0A087WWJ9	BRCA1-A complex subunit Abraxas	FAM175A	sp|Q6UWZ7|ABRX1_HUMAN BRCA1-A complex subunit Abraxas 1 OS=Homo sapiens (Human) OX=9606 GN=ABRAXAS1 PE=1 SV=2;tr|D6REL5|D6REL5_HUMAN Isoform of Q6UWZ7, MPN domain-containing protein OS=Homo sapiens (Human) OX=9606 GN=ABRAXAS1 PE=1 SV=1;sp|Q6UWZ7-2|ABRX1-2_	343960	242820	346130	230120	376810	270590	325310	249900	347580	241840	374920	263740	5	18.4141	17.9734	18.4411	17.8277	18.4311	17.9761	-0.503033	4.61798	3.5936	18.1772	-9.20102	2.87593				keep	5			14.4	5	5	14.4	14.4	46.662	0	16.331	186600000	5	409	5	5
A0A494C0R8;I3L2B0;K7EIG1;I3L318;I3L3A3;I3L350;I3L4B5	A0A494C0R8;I3L2B0;K7EIG1		CLUH	tr|A0A494C0R8|A0A494C0R8_HUMAN Isoform of O75153, Clustered mitochondria protein homolog OS=Homo sapiens (Human) OX=9606 GN=CLUH PE=1 SV=1;tr|I3L2B0|I3L2B0_HUMAN Isoform of O75153, Clustered mitochondria protein homolog OS=Homo sapiens (Human) OX=9606 GN=C	4272700	2963000	4319600	3010000	4848000	3382100	4040900	3054700	4335700	3152600	4822600	3299700	7	22.0489	21.5825	22.0826	21.5371	22.1165	21.6199	-0.502833	5.09583	3.92241	21.8312	-10.765	4.07871				keep	42			49.3	42	5	49.3	4.7	150.46	0	245.36	5892900000	67	1348	63	62
O60858;O60858-3;X6R9U5;O60858-2	O60858;O60858-3;X6R9U5	E3 ubiquitin-protein ligase TRIM13	TRIM13	sp|O60858|TRI13_HUMAN E3 ubiquitin-protein ligase TRIM13 OS=Homo sapiens (Human) OX=9606 GN=TRIM13 PE=1 SV=2;sp|O60858-3|TRI13-3_HUMAN Isoform of O60858, Isoform 3 of E3 ubiquitin-protein ligase TRIM13 OS=Homo sapiens (Human) OX=9606 GN=TRIM13 PE=1 SV=2;tr	174210	117700	178250	123320	183290	132550	164750	121670	178610	128800	182840	129170	4	17.4327	16.9286	17.4837	16.9278	17.3913	16.9465	-0.5016	5.16685	3.97076	17.1851	-11.0151	4.25592				keep	5			14.3	5	5	14.3	14.3	46.987	0	9.1724	111070000	7	407	5	5
Q8NBJ7;J3KQJ1;F8WA42;C9J660;A0A494C1B1;A8MXB9;Q8NBJ7-3;C9JL30;H7C3B2;E9PBT8;F8WEX5;E9PG02;J3QT17;Q8NBJ7-5;Q8NBJ7-2;F8WEV7;F8WES7;Q8NBJ7-4	Q8NBJ7;J3KQJ1;F8WA42;C9J660;A0A494C1B1;A8MXB9;Q8NBJ7-3;C9JL30;H7C3B2;E9PBT8;F8WEX5;E9PG02;J3QT17;Q8NBJ7-5;Q8NBJ7-2	Sulfatase-modifying factor 2	SUMF2	sp|Q8NBJ7|SUMF2_HUMAN Inactive C-alpha-formylglycine-generating enzyme 2 OS=Homo sapiens (Human) OX=9606 GN=SUMF2 PE=1 SV=2;tr|J3KQJ1|J3KQJ1_HUMAN Isoform of Q8NBJ7, Inactive C-alpha-formylglycine-generating enzyme 2 OS=Homo sapiens (Human) OX=9606 GN=SUMF	386120	297670	360530	239240	409090	270620	365310	303650	364830	251900	405920	264530	18	18.5809	18.2672	18.4999	17.8838	18.5496	17.9763	-0.501033	3.02135	2.42277	18.293	-5.25376	-1.15582				keep	7			21.9	7	7	21.9	21.9	33.843	0	32.151	557340000	13	301	10	10
Q969Z0;Q969Z0-2;C9J7P5;C9IZN7;H7C4R5;C9J5A2;C9J347	Q969Z0;Q969Z0-2;C9J7P5;C9IZN7	Protein TBRG4	TBRG4	sp|Q969Z0|FAKD4_HUMAN FAST kinase domain-containing protein 4 OS=Homo sapiens (Human) OX=9606 GN=TBRG4 PE=1 SV=1;sp|Q969Z0-2|FAKD4-2_HUMAN Isoform of Q969Z0, Isoform 2 of FAST kinase domain-containing protein 4 OS=Homo sapiens (Human) OX=9606 GN=TBRG4 PE=1	843440	471720	788170	564780	665870	563570	797150	496770	787060	584030	671220	546470	7	19.7082	18.9315	19.6283	19.123	19.2525	19.0346	-0.499967	2.48718	2.0229	19.2797	-4.24868	-2.49315				keep	13			30.4	13	13	30.4	30.4	70.737	0	65.62	1136500000	16	631	15	15
Q86SK9;Q86SK9-2	Q86SK9;Q86SK9-2	Stearoyl-CoA desaturase 5	SCD5	sp|Q86SK9|SCD5_HUMAN Stearoyl-CoA desaturase 5 OS=Homo sapiens (Human) OX=9606 GN=SCD5 PE=1 SV=2;sp|Q86SK9-2|SCD5-2_HUMAN Isoform of Q86SK9, Isoform 2 of Stearoyl-CoA desaturase 5 OS=Homo sapiens (Human) OX=9606 GN=SCD5 PE=1 SV=2	142680	104310	142690	100320	157360	103850	134960	106990	143640	104900	156450	101520	2	17.1446	16.7544	17.1627	16.63	17.1713	16.5945	-0.4999	4.61261	3.59059	16.9096	-9.1875	2.86476				keep	3			12.4	3	3	12.4	12.4	37.61	0	10.021	216160000	4	330	3	3
P11171;P11171-2;P11171-5;A0A2U3TZH6;A0A2R8Y5G2;P11171-7;A0A2R8Y5Z6;A0A2R8Y570;A0A3B3IU06;A0A2R8YFR9;P11171-3;A0A2R8YD30;A0A2R8Y6G5;A0A3B3IUD6;A0A2R8Y7Y3;A0A2R8YCW8;P11171-4;Q4VB86;P11171-6;A0A3B3ITP0;A0A2R8Y420;A0A2R8Y7N0;A0A2R8Y4N6;A0A3B3ITC5;A0A2R8Y6T6;A0A2R8Y5C8;A0A2R8Y783;A0A2R8YFU8	P11171;P11171-2;P11171-5;A0A2U3TZH6;A0A2R8Y5G2;P11171-7;A0A2R8Y5Z6;A0A2R8Y570;A0A3B3IU06;A0A2R8YFR9;P11171-3;A0A2R8YD30;A0A2R8Y6G5;A0A3B3IUD6;A0A2R8Y7Y3;A0A2R8YCW8;P11171-4;Q4VB86;P11171-6;A0A3B3ITP0;A0A2R8Y420;A0A2R8Y7N0;A0A2R8Y4N6	Protein 4.1	EPB41	sp|P11171|41_HUMAN Protein 4.1 OS=Homo sapiens (Human) OX=9606 GN=EPB41 PE=1 SV=4;sp|P11171-2|41-2_HUMAN Isoform of P11171, Isoform 2 of Protein 4.1 OS=Homo sapiens (Human) OX=9606 GN=EPB41 PE=1 SV=4;sp|P11171-5|41-5_HUMAN Isoform of P11171, Isoform 5 of P	3563600	2328300	3465000	2257200	3189200	2547500	3369600	2413000	3472400	2361200	3192900	2474500	28	21.7871	21.2347	21.7646	21.1218	21.5123	21.211	-0.498833	3.47503	2.7547	21.4386	-6.21257	-0.0117796				keep	30			39.6	30	13	39.6	17.5	97.016	0	165.07	4404300000	40	864	34	34
Q9UQ35;Q9UQ35-2;I3L4D8;I3L182;I3L1I8;Q9UQ35-3;A0A087X1W1;I3L0N7;I3L1C0;I3L4U6;I3L3Q8	Q9UQ35;Q9UQ35-2	Serine/arginine repetitive matrix protein 2	SRRM2	sp|Q9UQ35|SRRM2_HUMAN Serine/arginine repetitive matrix protein 2 OS=Homo sapiens (Human) OX=9606 GN=SRRM2 PE=1 SV=2;sp|Q9UQ35-2|SRRM2-2_HUMAN Isoform of Q9UQ35, Isoform 2 of Serine/arginine repetitive matrix protein 2 OS=Homo sapiens (Human) OX=9606 GN=SR	3319500	2118300	3062500	2052700	2779300	2210700	3138500	2198800	3073700	2140400	2785600	2147400	11	21.6848	21.0984	21.5864	20.9848	21.3139	21.0064	-0.4985	3.03772	2.43487	21.2791	-5.28654	-1.11463				keep	54			26.1	54	54	26.1	26.1	299.61	0	245.56	7932900000	63	2752	60	60
P09622;E9PEX6;P09622-2;P09622-3;F8WDM5;A0A1W2PR83;F2Z2E3	P09622;E9PEX6;P09622-2;P09622-3	Dihydrolipoyl dehydrogenase, mitochondrial;Dihydrolipoyl dehydrogenase	DLD	sp|P09622|DLDH_HUMAN Dihydrolipoyl dehydrogenase, mitochondrial OS=Homo sapiens (Human) OX=9606 GN=DLD PE=1 SV=2;tr|E9PEX6|E9PEX6_HUMAN Isoform of P09622, Dihydrolipoyl dehydrogenase OS=Homo sapiens (Human) OX=9606 GN=DLD PE=1 SV=1;sp|P09622-2|DLDH-2_HUMAN	5500300	3684900	5081300	3476800	4994200	3706600	5201200	3806600	5111700	3628700	4989300	3608800	7	22.4133	21.8971	22.3169	21.7451	22.1594	21.752	-0.498467	3.59501	2.84658	22.0473	-6.48506	0.291468				keep	16			40.7	16	16	40.7	40.7	54.177	0	60.545	8607500000	38	509	36	35
Q6UX07;Q6UX07-2;Q6UX07-3	Q6UX07;Q6UX07-2	Dehydrogenase/reductase SDR family member 13	DHRS13	sp|Q6UX07|DHR13_HUMAN Dehydrogenase/reductase SDR family member 13 OS=Homo sapiens (Human) OX=9606 GN=DHRS13 PE=2 SV=1;sp|Q6UX07-2|DHR13-2_HUMAN Isoform of Q6UX07, Isoform 2 of Dehydrogenase/reductase SDR family member 13 OS=Homo sapiens (Human) OX=9606 GN	258760	151720	233340	170720	235610	186960	244590	158840	233820	177290	236000	181640	3	18.0035	17.2949	17.8722	17.397	17.7536	17.4427	-0.498233	3.7017	2.9249	17.6273	-6.73458	0.561225				keep	5			18	5	5	18	18	40.848	0	9.6021	148470000	5	377	5	5
Q8NE86;Q8NE86-3;Q8NE86-2;S4R468	Q8NE86;Q8NE86-3;Q8NE86-2;S4R468	Calcium uniporter protein, mitochondrial	MCU	sp|Q8NE86|MCU_HUMAN Calcium uniporter protein, mitochondrial OS=Homo sapiens (Human) OX=9606 GN=MCU PE=1 SV=1;sp|Q8NE86-3|MCU-3_HUMAN Isoform of Q8NE86, Isoform 3 of Calcium uniporter protein, mitochondrial OS=Homo sapiens (Human) OX=9606 GN=MCU PE=1 SV=1;	1088200	712890	1039000	759930	1076100	764750	1029000	738430	1043500	789760	1074400	745650	4	20.0757	19.5272	20.0269	19.5512	19.945	19.475	-0.498067	4.73049	3.67802	19.7668	-9.55162	3.16089				keep	8			27.6	8	8	27.6	27.6	39.866	0	29.578	1385600000	10	351	10	10
Q12797;Q12797-10;Q12797-11;A0A087WW51;E5RG56;E5RHK2;E5RHJ2;Q12797-6;Q12797-7;Q12797-2;Q12797-9;Q12797-3;G3XAN5;Q12797-5;Q12797-4;E5RG29;Q12797-8	Q12797;Q12797-10	Aspartyl/asparaginyl beta-hydroxylase	ASPH	sp|Q12797|ASPH_HUMAN Aspartyl/asparaginyl beta-hydroxylase OS=Homo sapiens (Human) OX=9606 GN=ASPH PE=1 SV=3;sp|Q12797-10|ASPH-10_HUMAN Isoform of Q12797, Isoform 10 of Aspartyl/asparaginyl beta-hydroxylase OS=Homo sapiens (Human) OX=9606 GN=ASPH PE=1 SV=3	2355000	1631100	2297900	1669200	2559600	1735200	2227200	1680900	2311000	1740600	2547800	1694700	17	21.1895	20.7213	21.1721	20.6864	21.1951	20.657	-0.497333	5.28988	4.05306	20.9369	-11.4626	4.56351				keep	18			28.5	18	18	28.5	28.5	85.862	0	78.035	1637300000	25	758	24	24
Q9UHG3;Q9UHG3-2;F8W8W4;C9K055;C9JM55;C9JGT6	Q9UHG3;Q9UHG3-2	Prenylcysteine oxidase 1	PCYOX1	sp|Q9UHG3|PCYOX_HUMAN Prenylcysteine oxidase 1 OS=Homo sapiens (Human) OX=9606 GN=PCYOX1 PE=1 SV=3;sp|Q9UHG3-2|PCYOX-2_HUMAN Isoform of Q9UHG3, Isoform 2 of Prenylcysteine oxidase 1 OS=Homo sapiens (Human) OX=9606 GN=PCYOX1 PE=1 SV=3	2122000	1620700	1999400	1216700	2016400	1480200	2007500	1654700	2019600	1286200	2006700	1441700	6	21.0392	20.7121	20.9713	20.2303	20.8509	20.4277	-0.4971	2.48332	2.02049	20.7052	-4.24182	-2.50277				keep	15			39.6	15	15	39.6	39.6	56.639	0	50.339	1546500000	22	505	21	21
Q9GZY4;C9JA07;C9J6J1	Q9GZY4;C9JA07	Cytochrome c oxidase assembly factor 1 homolog	COA1	sp|Q9GZY4|COA1_HUMAN Cytochrome c oxidase assembly factor 1 homolog OS=Homo sapiens (Human) OX=9606 GN=COA1 PE=1 SV=1;tr|C9JA07|C9JA07_HUMAN Isoform of Q9GZY4, Cytochrome c oxidase assembly factor 1 homolog (Fragment) OS=Homo sapiens (Human) OX=9606 GN=COA	395850	276840	413130	265040	401390	305270	374380	285320	413890	278240	400660	296980	3	18.6168	18.1626	18.6964	18.0316	18.5222	18.1501	-0.497033	4.16368	3.26457	18.3633	-7.90182	1.73042				keep	5			48.6	5	5	48.6	48.6	16.694	0	22.912	324390000	5	146	5	5
Q9H329;Q9H329-2	Q9H329;Q9H329-2	Band 4.1-like protein 4B	EPB41L4B	sp|Q9H329|E41LB_HUMAN Band 4.1-like protein 4B OS=Homo sapiens (Human) OX=9606 GN=EPB41L4B PE=2 SV=2;sp|Q9H329-2|E41LB-2_HUMAN Isoform of Q9H329, Isoform 2 of Band 4.1-like protein 4B OS=Homo sapiens (Human) OX=9606 GN=EPB41L4B PE=2 SV=2	144300	89814	149060	104210	147770	115990	136420	93635	148840	108590	147870	112720	2	17.1609	16.5385	17.2257	16.6849	17.0806	16.754	-0.4966	3.88963	3.06214	16.9074	-7.19166	1.03659				keep	2			2.1	4	2	4.2	2.1	99.711	0	4.5003	33120000	2	900	2	2
Q92576;Q92576-2;E7EVH3;E9PE34;A0A1B0GX99;D6R9X2;E7ER40;D6RBF0;H0Y8L0	Q92576;Q92576-2;E7EVH3;E9PE34;A0A1B0GX99	PHD finger protein 3	PHF3	sp|Q92576|PHF3_HUMAN PHD finger protein 3 OS=Homo sapiens (Human) OX=9606 GN=PHF3 PE=1 SV=3;sp|Q92576-2|PHF3-2_HUMAN Isoform of Q92576, Isoform 2 of PHD finger protein 3 OS=Homo sapiens (Human) OX=9606 GN=PHF3 PE=1 SV=3;tr|E7EVH3|E7EVH3_HUMAN Isoform of Q9	2783900	1840300	2643900	1796800	2527300	1921900	2632500	1904400	2654700	1874600	2527600	1869700	9	21.4309	20.8954	21.3744	20.7927	21.1767	20.8045	-0.496467	3.70918	2.92968	21.0791	-6.75235	0.580153				keep	36			24.7	36	36	24.7	24.7	229.48	0	133.47	1632600000	43	2039	37	37
Q99551;B4DPR9	Q99551;B4DPR9	Transcription termination factor 1, mitochondrial	MTERF1	sp|Q99551|MTEF1_HUMAN Transcription termination factor 1, mitochondrial OS=Homo sapiens (Human) OX=9606 GN=MTERF1 PE=1 SV=1;tr|B4DPR9|B4DPR9_HUMAN Isoform of Q99551, Transcription termination factor 1, mitochondrial OS=Homo sapiens (Human) OX=9606 GN=MTERF	61446	43065	59192	42124	66604	45653	58114	44324	59581	44032	66260	44569	2	15.9293	15.4781	15.8933	15.3781	15.9309	15.4088	-0.496167	5.02826	3.88494	15.6698	-10.5305	3.90908				keep	2			5.5	2	2	5.5	5.5	45.778	0	6.7918	31127000	2	399	2	2
Q4G0N4;Q4G0N4-2;B7Z8V7;Q4G0N4-3;A0A0C4DGV3;D6RHI4;H0Y9H7	Q4G0N4;Q4G0N4-2;B7Z8V7;Q4G0N4-3;A0A0C4DGV3	NAD kinase 2, mitochondrial	NADK2	sp|Q4G0N4|NAKD2_HUMAN NAD kinase 2, mitochondrial OS=Homo sapiens (Human) OX=9606 GN=NADK2 PE=1 SV=2;sp|Q4G0N4-2|NAKD2-2_HUMAN Isoform of Q4G0N4, Isoform 2 of NAD kinase 2, mitochondrial OS=Homo sapiens (Human) OX=9606 GN=NADK2 PE=1 SV=2;tr|B7Z8V7|B7Z8V7_H	784460	493330	754890	570550	795040	572180	741660	513190	756890	591600	794380	557650	7	19.6036	18.9961	19.5661	19.1377	19.5082	19.0565	-0.495867	4.5784	3.5671	19.3114	-9.08005	2.77537				keep	10			28.3	10	10	28.3	28.3	49.432	0	25.849	616000000	11	442	11	11
P84157-3;K7EPS4	P84157-3	Matrix-remodeling-associated protein 7	MXRA7	sp|P84157-3|MXRA7-3_HUMAN Isoform of P84157, Isoform 3 of Matrix-remodeling-associated protein 7 OS=Homo sapiens (Human) OX=9606 GN=MXRA7 PE=1 SV=1	580180	354390	550980	418780	590570	435230	548480	369700	552130	434320	590190	423840	2	19.1684	18.5189	19.1118	18.6916	19.0793	18.6618	-0.495733	4.31605	3.37621	18.872	-8.31862	2.11431				keep	6			28.2	6	1	28.2	5.6	18.207	0	30.615	829890000	8	177	8	8
Q99643;Q99643-5;Q99643-3	Q99643;Q99643-5;Q99643-3	Succinate dehydrogenase cytochrome b560 subunit, mitochondrial	SDHC	sp|Q99643|C560_HUMAN Succinate dehydrogenase cytochrome b560 subunit, mitochondrial OS=Homo sapiens (Human) OX=9606 GN=SDHC PE=1 SV=1;sp|Q99643-5|C560-5_HUMAN Isoform of Q99643, Isoform 5 of Succinate dehydrogenase cytochrome b560 subunit, mitochondrial OS	90592	45774	74908	59517	68185	58150	85597	48691	74955	61165	68812	56374	3	16.4893	15.5661	16.233	15.8767	15.9648	15.7578	-0.4955	2.14672	1.75936	15.9813	-3.66399	-3.33602				keep	2			17.2	2	2	17.2	17.2	18.61	0.00012855	3.9809	1207000000	2	169	2	2
J3KN66;Q5JTV8-3;Q5JTV8;A0A0A0MSK5;Q5JTV8-2;H0YD16;H0YDU3	J3KN66;Q5JTV8-3;Q5JTV8;A0A0A0MSK5	Torsin-1A-interacting protein 1	TOR1AIP1	tr|J3KN66|J3KN66_HUMAN Isoform of Q5JTV8, Torsin-1A-interacting protein 1 OS=Homo sapiens (Human) OX=9606 GN=TOR1AIP1 PE=1 SV=1;sp|Q5JTV8-3|TOIP1-3_HUMAN Isoform of Q5JTV8, Isoform 3 of Torsin-1A-interacting protein 1 OS=Homo sapiens (Human) OX=9606 GN=TOR	3711200	2490800	3459300	2467200	3872000	2777900	3509500	2573000	3480500	2578100	3856400	2707600	7	21.8457	21.3321	21.7622	21.2502	21.7922	21.3359	-0.493967	4.88941	3.78917	21.553	-10.0658	3.56223				keep	18			37.7	18	7	37.7	15.7	67.821	0	126.7	4134300000	22	599	22	22
P43121;P43121-2	P43121;P43121-2	Cell surface glycoprotein MUC18	MCAM	sp|P43121|MUC18_HUMAN Cell surface glycoprotein MUC18 OS=Homo sapiens (Human) OX=9606 GN=MCAM PE=1 SV=2;sp|P43121-2|MUC18-2_HUMAN Isoform of P43121, Isoform 2 of Cell surface glycoprotein MUC18 OS=Homo sapiens (Human) OX=9606 GN=MCAM PE=1 SV=2	1373300	931320	1353000	970520	1457800	1031200	1298700	961860	1358700	1012000	1453100	1005600	2	20.4114	19.9128	20.4079	19.9041	20.3829	19.9063	-0.493	5.4034	4.11634	20.1542	-11.8904	4.84703				keep	13			26.5	13	13	26.5	26.5	71.607	0	101.6	1148900000	21	646	20	20
Q96H78;E9PGQ0	Q96H78;E9PGQ0	Solute carrier family 25 member 44	SLC25A44	sp|Q96H78|S2544_HUMAN Solute carrier family 25 member 44 OS=Homo sapiens (Human) OX=9606 GN=SLC25A44 PE=2 SV=1;tr|E9PGQ0|E9PGQ0_HUMAN Isoform of Q96H78, Solute carrier family 25 member 44 OS=Homo sapiens (Human) OX=9606 GN=SLC25A44 PE=1 SV=3	182620	125920	176000	126330	197190	137210	172710	129800	177050	131930	196290	133880	2	17.5007	17.026	17.4654	16.9626	17.4968	16.9964	-0.492633	5.23136	4.01909	17.2413	-11.2479	4.41739				keep	3			11.5	3	3	11.5	11.5	35.392	0	6.7594	185250000	4	314	4	4
P51530;P51530-4;F8VR31;P51530-3;P51530-2;H0Y455;F8VPM6	P51530;P51530-4;F8VR31;P51530-3;P51530-2	DNA replication ATP-dependent helicase/nuclease DNA2;DNA replication nuclease DNA2;DNA replication ATP-dependent helicase DNA2	DNA2	sp|P51530|DNA2_HUMAN DNA replication ATP-dependent helicase/nuclease DNA2 OS=Homo sapiens (Human) OX=9606 GN=DNA2 PE=1 SV=3;sp|P51530-4|DNA2-4_HUMAN Isoform of P51530, Isoform 4 of DNA replication ATP-dependent helicase/nuclease DNA2 OS=Homo sapiens (Human	267120	187660	302170	219990	350820	236260	252630	193570	302220	229760	348800	230790	7	18.0494	17.6017	18.2452	17.7628	18.328	17.7804	-0.492567	3.31852	2.63748	17.9612	-5.86951	-0.406983				keep	11			14.6	11	10	14.6	13.4	120.41	0	46.013	150050000	9	1060	9	9
Q8NE62;C9JYW4;C9J7D8	Q8NE62	Choline dehydrogenase, mitochondrial	CHDH	sp|Q8NE62|CHDH_HUMAN Choline dehydrogenase, mitochondrial OS=Homo sapiens (Human) OX=9606 GN=CHDH PE=1 SV=2	565480	368150	537050	366330	490460	380580	534690	381540	538920	381420	491440	370010	3	19.1313	18.5738	19.0749	18.4985	18.8114	18.4682	-0.492367	3.25207	2.58695	18.7597	-5.7279	-0.574631				keep	9			20	9	9	20	20	65.358	0	47.92	304960000	9	594	9	9
P12109;A0A087X0S5	P12109;A0A087X0S5	Collagen alpha-1(VI) chain	COL6A1	sp|P12109|CO6A1_HUMAN Collagen alpha-1(VI) chain OS=Homo sapiens (Human) OX=9606 GN=COL6A1 PE=1 SV=3;tr|A0A087X0S5|A0A087X0S5_HUMAN Isoform of P12109, Collagen alpha-1(VI) chain OS=Homo sapiens (Human) OX=9606 GN=COL6A1 PE=1 SV=1	695840	469640	673420	464510	699830	518350	658030	485140	676340	485490	698220	504710	2	19.4306	18.9251	19.4013	18.8411	19.3242	18.9139	-0.492	4.77211	3.70918	19.1394	-9.68546	3.2672				keep	11			18.2	11	11	18.2	18.2	108.53	0	29.313	367070000	11	1028	11	11
P07093;P07093-2;P07093-3;C9JN98	P07093;P07093-2;P07093-3;C9JN98	Glia-derived nexin	SERPINE2	sp|P07093|GDN_HUMAN Glia-derived nexin OS=Homo sapiens (Human) OX=9606 GN=SERPINE2 PE=1 SV=1;sp|P07093-2|GDN-2_HUMAN Isoform of P07093, Isoform 2 of Glia-derived nexin OS=Homo sapiens (Human) OX=9606 GN=SERPINE2 PE=1 SV=1;sp|P07093-3|GDN-3_HUMAN Isoform of	116440	79407	113820	83103	123040	85291	110110	81957	114390	86519	122630	83233	4	16.8515	16.3609	16.8366	16.3583	16.8164	16.3105	-0.4916	5.2636	4.03716	16.589	-11.3651	4.49746				keep	3			9.8	3	3	9.8	9.8	44.002	0	16.515	74619000	4	398	4	4
Q8N511;J3KS81;J3KRW7	Q8N511;J3KS81;J3KRW7	Transmembrane protein 199	TMEM199	sp|Q8N511|TM199_HUMAN Transmembrane protein 199 OS=Homo sapiens (Human) OX=9606 GN=TMEM199 PE=1 SV=1;tr|J3KS81|J3KS81_HUMAN Isoform of Q8N511, Transmembrane protein 199 OS=Homo sapiens (Human) OX=9606 GN=TMEM199 PE=1 SV=1;tr|J3KRW7|J3KRW7_HUMAN Isoform of	501940	303140	482850	319790	386920	333980	474500	316680	482630	332430	389900	323670	3	18.9594	18.2935	18.9214	18.3025	18.4693	18.2798	-0.491433	2.35788	1.9278	18.5376	-4.02214	-2.81436				keep	8			41.3	8	8	41.3	41.3	23.13	0	9.8352	227230000	8	208	7	7
P31040;P31040-2;D6RFM5;A0A087X1I3;P31040-3;A0A494C1T6;H0Y8X1	P31040;P31040-2;D6RFM5;A0A087X1I3;P31040-3	Succinate dehydrogenase [ubiquinone] flavoprotein subunit, mitochondrial	SDHA	sp|P31040|SDHA_HUMAN Succinate dehydrogenase [ubiquinone] flavoprotein subunit, mitochondrial OS=Homo sapiens (Human) OX=9606 GN=SDHA PE=1 SV=2;sp|P31040-2|SDHA-2_HUMAN Isoform of P31040, Isoform 2 of Succinate dehydrogenase [ubiquinone] flavoprotein subun	4105500	2404700	3711800	2436600	2910500	2613700	3880700	2518000	3714400	2533400	2937200	2530200	7	21.9914	21.2813	21.8638	21.2322	21.3804	21.248	-0.491367	2.01723	1.65896	21.4995	-3.45082	-3.6538				keep	20			46.8	20	20	46.8	46.8	72.691	0	152.59	5267400000	26	664	25	25
Q8TB22;A0A0U1RRL8;Q8TB22-3;Q8TB22-2;H0Y9M1;Q8TB22-4	Q8TB22;A0A0U1RRL8;Q8TB22-3;Q8TB22-2	Spermatogenesis-associated protein 20	SPATA20	sp|Q8TB22|SPT20_HUMAN Spermatogenesis-associated protein 20 OS=Homo sapiens (Human) OX=9606 GN=SPATA20 PE=2 SV=3;tr|A0A0U1RRL8|A0A0U1RRL8_HUMAN Isoform of Q8TB22, Spermatogenesis-associated protein 20 OS=Homo sapiens (Human) OX=9606 GN=SPATA20 PE=1 SV=1;sp	51917	37703	49428	32128	53468	39147	49108	38672	49813	33834	53201	38131	6	15.6861	15.2863	15.6332	14.9873	15.614	15.187	-0.4909	3.51923	2.78782	15.399	-6.31198	0.099926				keep	3			4.3	3	3	4.3	4.3	87.898	0	8.8621	28705000	3	786	3	3
P61587;E9PFH1;Q53RZ3	P61587;E9PFH1;Q53RZ3	Rho-related GTP-binding protein RhoE	RND3;ARHE	sp|P61587|RND3_HUMAN Rho-related GTP-binding protein RhoE OS=Homo sapiens (Human) OX=9606 GN=RND3 PE=1 SV=1;tr|E9PFH1|E9PFH1_HUMAN Isoform of P61587, Rho-related GTP-binding protein RhoE OS=Homo sapiens (Human) OX=9606 GN=RND3 PE=1 SV=1;tr|Q53RZ3|Q53RZ3_HU	51468	32786	50618	36185	55582	42243	48662	34071	50700	37778	55459	41096	3	15.6736	15.0847	15.6675	15.1588	15.6699	15.2968	-0.490233	4.20761	3.29597	15.4252	-8.01978	1.84073				keep	2			9.8	2	2	9.8	9.8	27.368	0.00012716	3.8036	48371000	2	244	2	2
O15164;O15164-2	O15164;O15164-2	Transcription intermediary factor 1-alpha	TRIM24	sp|O15164|TIF1A_HUMAN Transcription intermediary factor 1-alpha OS=Homo sapiens (Human) OX=9606 GN=TRIM24 PE=1 SV=3;sp|O15164-2|TIF1A-2_HUMAN Isoform of O15164, Isoform Short of Transcription intermediary factor 1-alpha OS=Homo sapiens (Human) OX=9606 GN=T	1788400	1211800	1778300	1172800	1682700	1304200	1691300	1251800	1783400	1226600	1682800	1268000	2	20.7925	20.2926	20.8022	20.1772	20.5899	20.2451	-0.4899	3.83234	3.01901	20.4833	-7.04988	0.891663				keep	28			39.6	29	28	40.5	39.6	116.83	0	111.88	1918100000	26	1050	24	24
Q5UIP0;Q5UIP0-2;H7C2B5;H7BZN3	Q5UIP0;Q5UIP0-2	Telomere-associated protein RIF1	RIF1	sp|Q5UIP0|RIF1_HUMAN Telomere-associated protein RIF1 OS=Homo sapiens (Human) OX=9606 GN=RIF1 PE=1 SV=2;sp|Q5UIP0-2|RIF1-2_HUMAN Isoform of Q5UIP0, Isoform 2 of Telomere-associated protein RIF1 OS=Homo sapiens (Human) OX=9606 GN=RIF1 PE=1 SV=2	8355900	5665100	8037600	5594500	8176300	6012500	7901900	5848700	8077000	5836900	8162800	5855700	4	23.0166	22.5176	22.9785	22.4313	22.8706	22.4499	-0.488967	4.49621	3.50393	22.7108	-8.83861	2.57111				keep	72			39.2	72	72	39.2	39.2	274.46	0	323.31	8987900000	88	2472	80	78
Q86VY4	Q86VY4	Testis-specific Y-encoded-like protein 5	TSPYL5	sp|Q86VY4|TSYL5_HUMAN Testis-specific Y-encoded-like protein 5 OS=Homo sapiens (Human) OX=9606 GN=TSPYL5 PE=1 SV=2	13604	10682	14719	10165	18050	11557	12872	10901	14809	10696	17883	11311	1	13.754	13.4668	13.8856	13.327	14.0473	13.4268	-0.488767	3.42076	2.71668	13.6512	-6.09206	-0.148871				keep	2			8.2	2	2	8.2	8.2	45.143	0	5.6637	4336600	2	417	2	2
Q2TB18;D6RG30;Q2TB18-2	Q2TB18;D6RG30;Q2TB18-2	Protein asteroid homolog 1	ASTE1	sp|Q2TB18|ASTE1_HUMAN Protein asteroid homolog 1 OS=Homo sapiens (Human) OX=9606 GN=ASTE1 PE=1 SV=1;tr|D6RG30|D6RG30_HUMAN Isoform of Q2TB18, Asteroid homolog 1 (Drosophila), isoform CRA_c OS=Homo sapiens (Human) OX=9606 GN=ASTE1 PE=1 SV=1;sp|Q2TB18-2|ASTE	18933	14305	18722	12456	21029	14532	17911	14628	18874	13000	20892	14183	3	14.2308	13.8881	14.2326	13.6203	14.2677	13.7573	-0.488467	3.79091	2.98712	13.9995	-6.94871	0.78687				keep	4			8.8	4	4	8.8	8.8	77.092	0	8.841	23303000	4	679	3	3
Q13491-4;B7Z613;B7Z248;Q13491-2;Q13491;Q13491-3	Q13491-4;B7Z613;B7Z248;Q13491-2;Q13491;Q13491-3	Neuronal membrane glycoprotein M6-b	GPM6B	sp|Q13491-4|GPM6B-4_HUMAN Isoform of Q13491, Isoform 4 of Neuronal membrane glycoprotein M6-b OS=Homo sapiens (Human) OX=9606 GN=GPM6B PE=1 SV=2;tr|B7Z613|B7Z613_HUMAN Isoform of Q13491, Neuronal membrane glycoprotein M6-b OS=Homo sapiens (Human) OX=9606 G	171330	119970	170420	122510	195680	135030	162040	123550	171310	128050	194650	131800	6	17.4086	16.9562	17.4189	16.9183	17.4857	16.9733	-0.488467	5.04721	3.89764	17.1935	-10.5954	3.95641				keep	2			7.9	2	2	7.9	7.9	36.219	0.00012728	3.8143	125180000	3	328	3	3
Q96I51;Q96I51-3;Q96I51-2;A0A087WT38	Q96I51;Q96I51-3;Q96I51-2	Williams-Beuren syndrome chromosomal region 16 protein	WBSCR16	sp|Q96I51|RCC1L_HUMAN RCC1-like G exchanging factor-like protein OS=Homo sapiens (Human) OX=9606 GN=RCC1L PE=1 SV=2;sp|Q96I51-3|RCC1L-3_HUMAN Isoform of Q96I51, Isoform 3 of RCC1-like G exchanging factor-like protein OS=Homo sapiens (Human) OX=9606 GN=RCC1	263980	176040	265910	188330	270220	198790	249620	182170	266560	196170	269910	193600	4	18.0323	17.5094	18.0607	17.5386	17.9514	17.5312	-0.4884	4.93554	3.81894	17.7706	-10.215	3.67519				keep	8			28.7	8	8	28.7	28.7	49.996	0	46.385	342210000	11	464	11	11
Q8NBI6;A0A140T9D0;Q8NBI6-3;Q8NBI6-2;H7C2F4;F8WEN6	Q8NBI6;A0A140T9D0	Xyloside xylosyltransferase 1	XXYLT1	sp|Q8NBI6|XXLT1_HUMAN Xyloside xylosyltransferase 1 OS=Homo sapiens (Human) OX=9606 GN=XXYLT1 PE=1 SV=1;tr|A0A140T9D0|A0A140T9D0_HUMAN Isoform of Q8NBI6, Xyloside xylosyltransferase 1 OS=Homo sapiens (Human) OX=9606 GN=XXYLT1 PE=1 SV=1	702950	459380	666720	498450	728710	518440	664680	475900	669880	518070	726970	505480	6	19.4453	18.8932	19.3869	18.9428	19.3826	18.9142	-0.4882	5.13787	3.9553	19.1608	-10.9134	4.1843				keep	11			38.2	11	11	38.2	38.2	43.806	0	25.678	414330000	12	393	12	12
P07737;K7EJ44;I3L3D5	P07737;K7EJ44	Profilin-1	PFN1	sp|P07737|PROF1_HUMAN Profilin-1 OS=Homo sapiens (Human) OX=9606 GN=PFN1 PE=1 SV=2;tr|K7EJ44|K7EJ44_HUMAN Isoform of P07737, Profilin OS=Homo sapiens (Human) OX=9606 GN=PFN1 PE=1 SV=1	4115300	3053900	4365800	3085300	5423200	3597800	3892900	3131000	4386500	3241200	5378300	3516500	3	21.9948	21.6261	22.098	21.5727	22.2783	21.709	-0.487767	3.47218	2.75303	21.8798	-6.20621	-0.0189714				keep	11			88.6	11	8	88.6	55.7	15.054	0	112.59	33006000000	38	140	38	38
Q9P1U1;Q9P1U1-3	Q9P1U1;Q9P1U1-3	Actin-related protein 3B	ACTR3B	sp|Q9P1U1|ARP3B_HUMAN Actin-related protein 3B OS=Homo sapiens (Human) OX=9606 GN=ACTR3B PE=2 SV=1;sp|Q9P1U1-3|ARP3B-3_HUMAN Isoform of Q9P1U1, Isoform 3 of Actin-related protein 3B OS=Homo sapiens (Human) OX=9606 GN=ACTR3B PE=2 SV=1	14957	11589	14803	8288.1	17134	13764	14151	11825	14916	8777.1	17007	13367	2	13.8908	13.5844	13.8938	13.0325	13.9721	13.679	-0.486933	1.83593	1.5166	13.6754	-3.15947	-4.0954				keep	2			10	6	2	20.3	10	47.607	0	7.5727	10579000	2	418	2	2
O15254;O15254-2	O15254;O15254-2	Peroxisomal acyl-coenzyme A oxidase 3	ACOX3	sp|O15254|ACOX3_HUMAN Peroxisomal acyl-coenzyme A oxidase 3 OS=Homo sapiens (Human) OX=9606 GN=ACOX3 PE=1 SV=2;sp|O15254-2|ACOX3-2_HUMAN Isoform of O15254, Isoform 2 of Peroxisomal acyl-coenzyme A oxidase 3 OS=Homo sapiens (Human) OX=9606 GN=ACOX3 PE=1 SV=	115060	72201	115320	85383	125520	94143	108780	75171	115400	88817	125350	91627	2	16.8342	16.2236	16.8554	16.3974	16.8451	16.4529	-0.486933	4.00261	3.14955	16.6014	-7.47816	1.3228				keep	4			8.9	4	4	8.9	8.9	77.628	0	12.923	72749000	4	700	4	4
Q6ZNB6;Q6ZNB6-2	Q6ZNB6;Q6ZNB6-2	NF-X1-type zinc finger protein NFXL1	NFXL1	sp|Q6ZNB6|NFXL1_HUMAN NF-X1-type zinc finger protein NFXL1 OS=Homo sapiens (Human) OX=9606 GN=NFXL1 PE=1 SV=2;sp|Q6ZNB6-2|NFXL1-2_HUMAN Isoform of Q6ZNB6, Isoform 2 of NF-X1-type zinc finger protein NFXL1 OS=Homo sapiens (Human) OX=9606 GN=NFXL1 PE=1 SV=2	978960	671640	987140	684370	919170	674080	925810	693130	990430	711930	919740	656500	2	19.9231	19.4412	19.9531	19.4001	19.7176	19.2929	-0.486533	3.59194	2.84382	19.6213	-6.47797	0.283699				keep	20			35.6	20	20	35.6	35.6	101.34	0	88.63	835290000	26	911	24	24
Q9NUJ1;Q9NUJ1-2;Q9NUJ1-3	Q9NUJ1;Q9NUJ1-2	Mycophenolic acid acyl-glucuronide esterase, mitochondrial	ABHD10	sp|Q9NUJ1|ABHDA_HUMAN Mycophenolic acid acyl-glucuronide esterase, mitochondrial OS=Homo sapiens (Human) OX=9606 GN=ABHD10 PE=1 SV=1;sp|Q9NUJ1-2|ABHDA-2_HUMAN Isoform of Q9NUJ1, Isoform 2 of Mycophenolic acid acyl-glucuronide esterase, mitochondrial OS=Hom	998520	693800	992620	689120	1048900	758820	944350	714980	997090	720260	1045700	739420	3	19.9517	19.488	19.9611	19.4101	19.908	19.4638	-0.4863	5.05306	3.89933	19.6971	-10.6162	3.97146				keep	7			20.6	7	7	20.6	20.6	33.932	0	21.904	718650000	9	306	9	9
Q12893	Q12893	Transmembrane protein 115	TMEM115	sp|Q12893|TM115_HUMAN Transmembrane protein 115 OS=Homo sapiens (Human) OX=9606 GN=TMEM115 PE=1 SV=1	201450	129500	199110	156730	230160	158780	190470	134470	199700	162500	229430	154970	1	17.6423	17.0665	17.6434	17.2736	17.7199	17.207	-0.486167	4.07779	3.20109	17.4254	-7.67314	1.51265				keep	5			20.5	5	5	20.5	20.5	38.197	0	26.062	439620000	9	351	8	8
Q06481;Q06481-3;Q06481-6;Q06481-4;Q06481-2;Q06481-5;E9PQS3;E9PSC7;E9PK76	Q06481;Q06481-3;Q06481-6;Q06481-4;Q06481-2;Q06481-5	Amyloid-like protein 2	APLP2	sp|Q06481|APLP2_HUMAN Amyloid-like protein 2 OS=Homo sapiens (Human) OX=9606 GN=APLP2 PE=1 SV=2;sp|Q06481-3|APLP2-3_HUMAN Isoform of Q06481, Isoform 3 of Amyloid-like protein 2 OS=Homo sapiens (Human) OX=9606 GN=APLP2 PE=1 SV=2;sp|Q06481-6|APLP2-6_HUMAN Is	2144100	1446000	2248600	1576100	2315300	1710100	2027500	1495600	2251100	1644100	2311400	1665300	9	21.0542	20.5475	21.1408	20.6036	21.0504	20.636	-0.4861	4.78781	3.71835	20.8388	-9.73235	3.30414				keep	16			30.3	16	16	30.3	30.3	86.955	0	77.29	1598200000	24	763	24	23
Q15390;H0YBZ4;Q15390-2;H7C5V5;H0YF01;E5RIB6	Q15390;H0YBZ4;Q15390-2;H7C5V5;H0YF01	Mitochondrial fission regulator 1	MTFR1	sp|Q15390|MTFR1_HUMAN Mitochondrial fission regulator 1 OS=Homo sapiens (Human) OX=9606 GN=MTFR1 PE=1 SV=2;tr|H0YBZ4|H0YBZ4_HUMAN Isoform of Q15390, Mitochondrial fission regulator 1 (Fragment) OS=Homo sapiens (Human) OX=9606 GN=MTFR1 PE=1 SV=1;sp|Q15390-2	687980	484780	683290	495190	745660	510500	650690	498910	687150	516090	742700	498400	6	19.4142	18.9709	19.4223	18.9333	19.4157	18.8919	-0.485367	5.15739	3.96383	19.1747	-10.981	4.23196				keep	10			34.2	10	10	34.2	34.2	37	0	23.746	687390000	11	333	9	9
Q9P273;Q9NT68;D6RGC5;Q6N022;F8VNQ3;G3V106;Q9NT68-2	Q9P273	Teneurin-3	TENM3	sp|Q9P273|TEN3_HUMAN Teneurin-3 OS=Homo sapiens (Human) OX=9606 GN=TENM3 PE=2 SV=3	1107300	720580	1101100	769720	1086900	835570	1047000	747350	1103100	801920	1087200	812600	7	20.1008	19.5427	20.1107	19.5697	19.9594	19.6028	-0.485233	4.44977	3.47276	19.8144	-8.7025	2.45382				keep	32			18.8	32	32	18.8	18.8	300.95	0	140.98	712810000	34	2699	32	32
Q8NFG4;Q8NFG4-2;C9J4C4;Q8NFG4-3	Q8NFG4;Q8NFG4-2	Folliculin	FLCN	sp|Q8NFG4|FLCN_HUMAN Folliculin OS=Homo sapiens (Human) OX=9606 GN=FLCN PE=1 SV=1;sp|Q8NFG4-2|FLCN-2_HUMAN Isoform of Q8NFG4, Isoform 2 of Folliculin OS=Homo sapiens (Human) OX=9606 GN=FLCN PE=1 SV=1	222360	151100	229060	163680	250870	181470	210280	156130	229600	170860	250050	176830	4	17.7848	17.289	17.8455	17.3362	17.8442	17.3997	-0.4832	4.80688	3.73157	17.5832	-9.79061	3.34981				keep	8			24	8	8	24	24	64.473	0	41.257	140930000	7	579	7	7
Q8NI22;Q8NI22-2;Q8NI22-3;H7BZ18;A0A3B3IU18	Q8NI22;Q8NI22-2;Q8NI22-3	Multiple coagulation factor deficiency protein 2	MCFD2	sp|Q8NI22|MCFD2_HUMAN Multiple coagulation factor deficiency protein 2 OS=Homo sapiens (Human) OX=9606 GN=MCFD2 PE=1 SV=1;sp|Q8NI22-2|MCFD2-2_HUMAN Isoform of Q8NI22, Isoform 2 of Multiple coagulation factor deficiency protein 2 OS=Homo sapiens (Human) OX=	185440	108530	182600	118690	91923	84950	175280	113750	182100	122010	94455	82140	5	17.5228	16.8116	17.5185	16.8726	16.3957	16.3047	-0.4827	0.804873	0.666394	16.9043	-1.57386	-6.4694				keep	4			44.5	4	4	44.5	44.5	16.39	0	39.837	187040000	7	146	6	5
Q9Y3A4;Q9NSQ0	Q9Y3A4	Ribosomal RNA-processing protein 7 homolog A	RRP7A	sp|Q9Y3A4|RRP7A_HUMAN Ribosomal RNA-processing protein 7 homolog A OS=Homo sapiens (Human) OX=9606 GN=RRP7A PE=1 SV=2	1838400	1120100	1750100	1171600	1394400	1202300	1737900	1168800	1750800	1216500	1405900	1165200	2	20.8323	20.1791	20.7792	20.1758	20.3188	20.1277	-0.482567	2.23573	1.83098	20.4022	-3.81327	-3.11662				keep	10			51.8	10	10	51.8	51.8	32.334	0	27.27	2191500000	13	280	11	11
Q5EB52;C9JW74;Q5EB52-2;C9JWU9;Q5EB52-3;R4GN52;C9JUD2;C9JRA9;C9JCM6;C9JG66	Q5EB52;C9JW74;Q5EB52-2;C9JWU9;Q5EB52-3;R4GN52;C9JUD2	Mesoderm-specific transcript homolog protein	MEST	sp|Q5EB52|MEST_HUMAN Mesoderm-specific transcript homolog protein OS=Homo sapiens (Human) OX=9606 GN=MEST PE=2 SV=2;tr|C9JW74|C9JW74_HUMAN Isoform of Q5EB52, AB hydrolase-1 domain-containing protein OS=Homo sapiens (Human) OX=9606 GN=MEST PE=1 SV=2;sp|Q5EB	232640	160060	235310	163660	251220	184950	220010	165140	236100	171100	250490	180110	10	17.85	17.3721	17.8844	17.3361	17.8462	17.4271	-0.481767	5.0048	3.86733	17.6193	-10.4507	3.8505				keep	5			24.8	5	5	24.8	24.8	38.83	0	32.401	292220000	5	335	4	4
Q9C0B5;Q9C0B5-2;Q9ULC8;H0YEF4;E9PMA5;Q9ULC8-2;Q9ULC8-3	Q9C0B5;Q9C0B5-2	Palmitoyltransferase ZDHHC5	ZDHHC5	sp|Q9C0B5|ZDHC5_HUMAN Palmitoyltransferase ZDHHC5 OS=Homo sapiens (Human) OX=9606 GN=ZDHHC5 PE=1 SV=2;sp|Q9C0B5-2|ZDHC5-2_HUMAN Isoform of Q9C0B5, Isoform 2 of Palmitoyltransferase ZDHHC5 OS=Homo sapiens (Human) OX=9606 GN=ZDHHC5 PE=1 SV=2	328650	218890	334160	226680	329010	257010	310770	226580	334660	236810	328970	249820	7	18.3484	17.8237	18.3903	17.806	18.2354	17.9018	-0.480867	4.34486	3.39394	18.0843	-8.39922	2.18668				keep	8			14.3	8	8	14.3	14.3	77.544	0	21.943	216240000	9	715	8	8
O75970;F5H1U9;O75970-3;O75970-5;O75970-2;B7ZB24;A0A075B6R8;F5H8D6	O75970;F5H1U9;O75970-3;O75970-5;O75970-2;B7ZB24	Multiple PDZ domain protein	MPDZ	sp|O75970|MPDZ_HUMAN Multiple PDZ domain protein OS=Homo sapiens (Human) OX=9606 GN=MPDZ PE=1 SV=2;tr|F5H1U9|F5H1U9_HUMAN Isoform of O75970, Multiple PDZ domain protein OS=Homo sapiens (Human) OX=9606 GN=MPDZ PE=1 SV=1;sp|O75970-3|MPDZ-3_HUMAN Isoform of O	1376100	963270	1351100	941660	1446900	1047000	1301400	991800	1358500	984380	1442200	1020200	8	20.4144	19.9615	20.4059	19.8606	20.3721	19.9282	-0.4807	4.92445	3.81196	20.1571	-10.1747	3.64479				keep	21			15.2	21	8	15.2	5.1	221.62	0	56.911	680970000	24	2070	22	22
Q9NZU5;B4DEY6;Q9NZU5-2;C9IYS1;H7C3D2	Q9NZU5;B4DEY6;Q9NZU5-2	LIM and cysteine-rich domains protein 1	LMCD1	sp|Q9NZU5|LMCD1_HUMAN LIM and cysteine-rich domains protein 1 OS=Homo sapiens (Human) OX=9606 GN=LMCD1 PE=1 SV=1;tr|B4DEY6|B4DEY6_HUMAN Isoform of Q9NZU5, LIM and cysteine-rich domains protein 1 OS=Homo sapiens (Human) OX=9606 GN=LMCD1 PE=1 SV=1;sp|Q9NZU5-	65676	50044	62142	50619	90513	51524	62133	51108	62955	52827	89471	50665	5	16.0253	15.6948	15.9635	15.6431	16.3734	15.5833	-0.480333	2.67933	2.17067	15.8806	-4.59664	-2.01377				keep	4			13.4	4	4	13.4	13.4	40.832	0	8.392	30502000	4	365	4	4
P18206;P18206-2;P18206-3;A0A096LPE1	P18206;P18206-2	Vinculin	VCL	sp|P18206|VINC_HUMAN Vinculin OS=Homo sapiens (Human) OX=9606 GN=VCL PE=1 SV=4;sp|P18206-2|VINC-2_HUMAN Isoform of P18206, Isoform 1 of Vinculin OS=Homo sapiens (Human) OX=9606 GN=VCL PE=1 SV=4	12127000	8917500	12551000	9047300	15239000	10181000	11471000	9146900	12622000	9476300	15129000	9948600	4	23.5539	23.1721	23.6215	23.1248	23.7688	23.2097	-0.4792	3.98948	3.13995	23.4085	-7.44403	1.28916				keep	53			55.6	53	53	55.6	55.6	123.8	0	213.27	24666000000	166	1134	158	158
Q9NY35;D6RC11;D6RCR8;D6RDI6;D6RFX6;D6RCE6;D6R9S8;A0A0R4J2F2;D6RDY1;D6RHU6;D6RDP6;D6RIU2;D6RA76;Q9NY35-2;D6RAZ7;H0Y8T9;D6RD48	Q9NY35;D6RC11;D6RCR8;D6RDI6;D6RFX6;D6RCE6;D6R9S8;A0A0R4J2F2;D6RDY1;D6RHU6;D6RDP6;D6RIU2;D6RA76;Q9NY35-2;D6RAZ7;H0Y8T9;D6RD48	Claudin domain-containing protein 1	CLDND1	sp|Q9NY35|CLDN1_HUMAN Claudin domain-containing protein 1 OS=Homo sapiens (Human) OX=9606 GN=CLDND1 PE=1 SV=1;tr|D6RC11|D6RC11_HUMAN Isoform of Q9NY35, Claudin domain-containing protein 1 OS=Homo sapiens (Human) OX=9606 GN=CLDND1 PE=1 SV=1;tr|D6RCR8|D6RCR8	260640	181510	256130	180570	280460	202400	246500	186980	257480	188730	279440	197240	17	18.0139	17.5536	18.0067	17.4779	18.005	17.5572	-0.478967	5.05502	3.89933	17.769	-10.6218	3.97553				keep	4			17.8	4	4	17.8	17.8	28.603	0	13.762	141290000	4	253	4	4
P17028;P17028-2;K7EQP8;K7EPZ8;K7EPL1	P17028	Zinc finger protein 24	ZNF24	sp|P17028|ZNF24_HUMAN Zinc finger protein 24 OS=Homo sapiens (Human) OX=9606 GN=ZNF24 PE=1 SV=4	755900	465150	747950	457900	557810	525180	714610	485180	746730	478450	563300	507760	5	19.5501	18.9112	19.5527	18.8204	18.997	18.9328	-0.478467	1.94775	1.6034	19.1274	-3.33825	-3.82352				keep	11			44	11	10	44	41.6	42.155	0	74.689	973070000	11	368	9	9
Q9H2G2;Q9H2G2-2;A0A5F9ZH68	Q9H2G2;Q9H2G2-2	STE20-like serine/threonine-protein kinase	SLK	sp|Q9H2G2|SLK_HUMAN STE20-like serine/threonine-protein kinase OS=Homo sapiens (Human) OX=9606 GN=SLK PE=1 SV=1;sp|Q9H2G2-2|SLK-2_HUMAN Isoform of Q9H2G2, Isoform 2 of STE20-like serine/threonine-protein kinase OS=Homo sapiens (Human) OX=9606 GN=SLK PE=1 S	4134500	2988500	4389000	3080300	5016900	3513400	3910800	3071300	4404400	3226500	4989600	3427400	3	22.0015	21.5949	22.1056	21.5704	22.1659	21.6748	-0.477633	4.25571	3.33158	21.8522	-8.15045	1.96138				keep	40			45.1	40	39	45.1	44.2	142.69	0	186.97	4525700000	51	1235	47	47
Q49B96;F8WEL9	Q49B96;F8WEL9	Cytochrome c oxidase assembly protein COX19	COX19	sp|Q49B96|COX19_HUMAN Cytochrome c oxidase assembly protein COX19 OS=Homo sapiens (Human) OX=9606 GN=COX19 PE=1 SV=1;tr|F8WEL9|F8WEL9_HUMAN Isoform of Q49B96, CHCH domain-containing protein OS=Homo sapiens (Human) OX=9606 GN=COX19 PE=1 SV=1	322690	204870	302900	192220	254390	224660	305090	212830	303550	200950	255810	217580	2	18.322	17.7282	18.2486	17.5681	17.8643	17.7077	-0.476967	2.38155	1.94534	17.9065	-4.06318	-2.75565				keep	5			58.9	5	5	58.9	58.9	10.394	0	6.0266	217750000	5	90	4	4
O14874;H3BTL2;H3BS02;O14874-2;O14874-3;H3BNP3	O14874;H3BTL2;H3BS02;O14874-2;O14874-3	[3-methyl-2-oxobutanoate dehydrogenase [lipoamide]] kinase, mitochondrial	BCKDK	sp|O14874|BCKD_HUMAN [3-methyl-2-oxobutanoate dehydrogenase [lipoamide]] kinase, mitochondrial OS=Homo sapiens (Human) OX=9606 GN=BCKDK PE=1 SV=2;tr|H3BTL2|H3BTL2_HUMAN Isoform of O14874, Protein-serine/threonine kinase (Fragment) OS=Homo sapiens (Human) O	117200	84678	122220	88430	136260	92840	110860	87006	122780	92255	135620	90655	6	16.8608	16.4536	16.9393	16.448	16.9636	16.4328	-0.476433	4.91364	3.80358	16.683	-10.1417	3.61984				keep	4			13.1	4	4	13.1	13.1	46.36	0	54.974	159440000	5	412	5	5
Q7L0Y3;C9JVB6	Q7L0Y3;C9JVB6	Mitochondrial ribonuclease P protein 1	TRMT10C	sp|Q7L0Y3|TM10C_HUMAN tRNA methyltransferase 10 homolog C OS=Homo sapiens (Human) OX=9606 GN=TRMT10C PE=1 SV=2;tr|C9JVB6|C9JVB6_HUMAN Isoform of Q7L0Y3, SAM-dependent MTase TRM10-type domain-containing protein (Fragment) OS=Homo sapiens (Human) OX=9606 GN=	2661600	1788900	2554800	1832400	2533600	1872400	2517000	1848400	2567500	1904700	2533500	1823200	2	21.3661	20.8545	21.3249	20.821	21.1803	20.7668	-0.476333	4.13136	3.24193	21.0523	-7.81408	1.64748				keep	21			57.6	21	21	57.6	57.6	47.346	0	81.853	5498200000	36	403	34	34
P52569;A0A1W2PR06;P52569-3;P52569-2	P52569;A0A1W2PR06;P52569-3;P52569-2	Cationic amino acid transporter 2	SLC7A2	sp|P52569|CTR2_HUMAN Cationic amino acid transporter 2 OS=Homo sapiens (Human) OX=9606 GN=SLC7A2 PE=1 SV=2;tr|A0A1W2PR06|A0A1W2PR06_HUMAN Isoform of P52569, AA_permease_C domain-containing protein (Fragment) OS=Homo sapiens (Human) OX=9606 GN=SLC7A2 PE=1 S	971760	667060	973780	728670	1093600	758920	919000	688300	978170	758070	1089600	740570	4	19.9125	19.4313	19.9334	19.4906	19.9682	19.464	-0.476067	5.0846	3.91758	19.7	-10.7248	4.0499				keep	7			10.9	7	6	10.9	9	71.672	0	15.764	415730000	12	658	12	12
P50150	P50150	Guanine nucleotide-binding protein G(I)/G(S)/G(O) subunit gamma-4	GNG4	sp|P50150|GBG4_HUMAN Guanine nucleotide-binding protein G(I)/G(S)/G(O) subunit gamma-4 OS=Homo sapiens (Human) OX=9606 GN=GNG4 PE=1 SV=1	103600	57271	99497	80331	107070	85653	97907	60420	99359	82904	107380	83195	1	16.6829	15.8894	16.6425	16.3094	16.6158	16.3166	-0.475267	2.48608	2.02243	16.4094	-4.24671	-2.4959				keep	2			44	2	2	44	44	8.3887	0	8.7147	60186000	2	75	2	2
Q86V85	Q86V85	Integral membrane protein GPR180	GPR180	sp|Q86V85|GP180_HUMAN Integral membrane protein GPR180 OS=Homo sapiens (Human) OX=9606 GN=GPR180 PE=2 SV=1	105780	73523	105650	75041	115080	83287	100040	75770	106130	78358	114700	81157	1	16.7129	16.2498	16.7291	16.2111	16.7199	16.2762	-0.474933	5.15366	3.96132	16.4832	-10.968	4.22284				keep	3			8.2	3	3	8.2	8.2	49.395	0	14.315	68325000	3	440	3	3
Q8WWQ0;H0Y4A7;H0Y4R9	Q8WWQ0	PH-interacting protein	PHIP	sp|Q8WWQ0|PHIP_HUMAN PH-interacting protein OS=Homo sapiens (Human) OX=9606 GN=PHIP PE=1 SV=2	2796400	1839300	2739000	1896700	2460700	1932600	2644200	1905100	2746600	1971100	2468600	1878200	3	21.4374	20.8946	21.4254	20.8708	21.1382	20.8125	-0.474367	3.20586	2.5561	21.0965	-5.63079	-0.691153				keep	40			29.5	40	37	29.5	28.1	206.69	0	182.91	2409500000	47	1821	41	41
Q6FIF0;Q6FIF0-2;H3BM82;H0YMR5;H0YLR2;H0YME2;H0YK21;H0YK54;H3BT16;H3BP46	Q6FIF0;Q6FIF0-2;H3BM82	AN1-type zinc finger protein 6	ZFAND6	sp|Q6FIF0|ZFAN6_HUMAN AN1-type zinc finger protein 6 OS=Homo sapiens (Human) OX=9606 GN=ZFAND6 PE=1 SV=2;sp|Q6FIF0-2|ZFAN6-2_HUMAN Isoform of Q6FIF0, Isoform 2 of AN1-type zinc finger protein 6 OS=Homo sapiens (Human) OX=9606 GN=ZFAND6 PE=1 SV=2;tr|H3BM82|	450300	268100	492350	287850	324550	333570	425660	281130	488950	300970	329420	321800	10	18.8028	18.1163	18.9495	18.1507	18.2157	18.278	-0.474333	1.57221	1.30435	18.4188	-2.74759	-4.72908				keep	6			36.1	6	5	36.1	31.2	22.555	0	27.805	260080000	6	208	6	6
O15091;O15091-4;O15091-2;A0A0A0MTQ0;O15091-3	O15091;O15091-4;O15091-2	Mitochondrial ribonuclease P protein 3	KIAA0391	sp|O15091|MRPP3_HUMAN Mitochondrial ribonuclease P catalytic subunit OS=Homo sapiens (Human) OX=9606 GN=PRORP PE=1 SV=2;sp|O15091-4|MRPP3-4_HUMAN Isoform of O15091, Isoform 4 of Mitochondrial ribonuclease P catalytic subunit OS=Homo sapiens (Human) OX=9606	696380	441410	666140	498320	676210	510550	658410	458760	668210	516510	676870	496790	5	19.4317	18.8356	19.3856	18.9424	19.2747	18.8921	-0.473967	4.27409	3.34622	19.127	-8.2014	2.00799				keep	12			26.1	12	12	26.1	26.1	67.315	0	35.181	538040000	13	583	12	12
Q9GZU1;M0QXD0	Q9GZU1;M0QXD0	Mucolipin-1	MCOLN1	sp|Q9GZU1|MCLN1_HUMAN Mucolipin-1 OS=Homo sapiens (Human) OX=9606 GN=MCOLN1 PE=1 SV=1;tr|M0QXD0|M0QXD0_HUMAN Isoform of Q9GZU1, Mucolipin-1 (Fragment) OS=Homo sapiens (Human) OX=9606 GN=MCOLN1 PE=1 SV=1	30695	16625	30405	19073	22064	23329	29008	17591	30220	19871	22395	22491	2	14.9279	14.1049	14.9322	14.235	14.337	14.4402	-0.472333	1.63309	1.35123	14.4962	-2.84164	-4.58385				keep	2			7.4	2	2	7.4	7.4	65.022	0	7.6773	35851000	2	580	2	2
Q9UQB8;Q9UQB8-4;Q9UQB8-2;Q9UQB8-3;I3L4C2;Q9UQB8-5;B4DWA1;I3L2M4;I3L327;I3L1C8;I3L0Y9;I3L125;I3L0M4;I3L3J7;I3L3C5;I3L526;I3L113;I3L4A3;I3L2J6	Q9UQB8;Q9UQB8-4;Q9UQB8-2;Q9UQB8-3;I3L4C2;Q9UQB8-5;B4DWA1	Brain-specific angiogenesis inhibitor 1-associated protein 2	BAIAP2	sp|Q9UQB8|BAIP2_HUMAN Brain-specific angiogenesis inhibitor 1-associated protein 2 OS=Homo sapiens (Human) OX=9606 GN=BAIAP2 PE=1 SV=1;sp|Q9UQB8-4|BAIP2-4_HUMAN Isoform of Q9UQB8, Isoform 4 of Brain-specific angiogenesis inhibitor 1-associated protein 2 OS	1364800	933290	1391200	970220	1469600	1108700	1290700	963610	1395100	1013700	1466700	1078900	19	20.4025	19.9158	20.4481	19.9037	20.3946	20.0108	-0.471633	4.73283	3.6804	20.1792	-9.5611	3.16846				keep	19			43.8	19	1	43.8	1.6	60.867	0	52.813	808860000	22	552	21	21
P05067;P05067-8;P05067-7;P05067-11;P05067-9;E9PG40;H7C0V9	P05067;P05067-8;P05067-7;P05067-11;P05067-9;E9PG40;H7C0V9	Amyloid beta A4 protein;N-APP;Soluble APP-alpha;Soluble APP-beta;C99;Beta-amyloid protein 42;Beta-amyloid protein 40;C83;P3(42);P3(40);C80;Gamma-secretase C-terminal fragment 59;Gamma-secretase C-terminal fragment 57;Gamma-secretase C-terminal fragment 50;C31	APP	sp|P05067|A4_HUMAN Amyloid-beta precursor protein OS=Homo sapiens (Human) OX=9606 GN=APP PE=1 SV=3;sp|P05067-8|A4-8_HUMAN Isoform of P05067, Isoform APP751 of Amyloid-beta precursor protein OS=Homo sapiens (Human) OX=9606 GN=APP PE=1 SV=3;sp|P05067-7|A4-7_	2965300	2012700	3035900	2097400	2901200	2226700	2804200	2079700	3042600	2184800	2903600	2165600	7	21.522	21.0246	21.5739	21.0159	21.3758	21.0168	-0.471467	4.16622	3.26626	21.2548	-7.90757	1.73582				keep	17			29.1	17	2	29.1	2.9	86.942	0	87.788	1890300000	22	770	22	22
P11182;Q5VVL7	P11182;Q5VVL7	Lipoamide acyltransferase component of branched-chain alpha-keto acid dehydrogenase complex, mitochondrial	DBT	sp|P11182|ODB2_HUMAN Lipoamide acyltransferase component of branched-chain alpha-keto acid dehydrogenase complex, mitochondrial OS=Homo sapiens (Human) OX=9606 GN=DBT PE=1 SV=3;tr|Q5VVL7|Q5VVL7_HUMAN Isoform of P11182, Dihydrolipoamide acetyltransferase co	1067700	745000	1045700	697000	964960	746940	1009700	767270	1050800	727570	965910	726240	2	20.0483	19.5908	20.0362	19.4265	19.7877	19.441	-0.4713	3.20766	2.55685	19.7218	-5.63455	-0.686614				keep	12			39.4	12	12	39.4	39.4	53.486	0	47.148	637500000	14	482	14	14
Q9NZV1;H7C2T6	Q9NZV1;H7C2T6	Cysteine-rich motor neuron 1 protein;Processed cysteine-rich motor neuron 1 protein	CRIM1	sp|Q9NZV1|CRIM1_HUMAN Cysteine-rich motor neuron 1 protein OS=Homo sapiens (Human) OX=9606 GN=CRIM1 PE=1 SV=1;tr|H7C2T6|H7C2T6_HUMAN Isoform of Q9NZV1, IGFBP N-terminal domain-containing protein (Fragment) OS=Homo sapiens (Human) OX=9606 GN=CRIM1 PE=1 SV=1	52205	35254	54883	38372	52219	39821	49368	36461	54940	39921	52278	38736	2	15.6941	15.1894	15.7842	15.2435	15.5799	15.2116	-0.471233	4.11805	3.23154	15.4504	-7.77851	1.61364				keep	4			6.2	4	4	6.2	6.2	113.74	0	14.226	36355000	4	1036	4	4
P10620;F5H7F6;F5H6X2;P10620-2;F5H760	P10620;F5H7F6;F5H6X2;P10620-2	Microsomal glutathione S-transferase 1	MGST1	sp|P10620|MGST1_HUMAN Microsomal glutathione S-transferase 1 OS=Homo sapiens (Human) OX=9606 GN=MGST1 PE=1 SV=1;tr|F5H7F6|F5H7F6_HUMAN Isoform of P10620, Microsomal glutathione S-transferase 1 (Fragment) OS=Homo sapiens (Human) OX=9606 GN=MGST1 PE=1 SV=1;t	595590	382100	553130	435650	612490	436440	563130	396460	556180	450930	611690	425500	5	19.2062	18.6275	19.1174	18.7485	19.1319	18.6658	-0.471233	4.54212	3.54191	18.9162	-8.97436	2.68655				keep	3			19.4	3	3	19.4	19.4	17.598	0	11.227	2710200000	6	155	5	5
Q5T7P8;A0A286YEX2;Q5T7P8-2;V9GYC4;V9GYY7	Q5T7P8;A0A286YEX2;Q5T7P8-2	Synaptotagmin-6	SYT6	sp|Q5T7P8|SYT6_HUMAN Synaptotagmin-6 OS=Homo sapiens (Human) OX=9606 GN=SYT6 PE=1 SV=3;tr|A0A286YEX2|A0A286YEX2_HUMAN Isoform of Q5T7P8, Synaptotagmin VI, isoform CRA_b OS=Homo sapiens (Human) OX=9606 GN=SYT6 PE=1 SV=1;sp|Q5T7P8-2|SYT6-2_HUMAN Isoform of Q	147940	106070	153630	108500	164220	116830	139930	108970	154270	113270	163680	113910	5	17.1969	16.7785	17.2693	16.743	17.2328	16.7644	-0.471033	5.05799	3.90004	16.9975	-10.6326	3.98334				keep	6			12.7	6	6	12.7	12.7	57.324	0	19.47	126390000	7	510	7	6
Q9HC56;Q5VT82;B7ZM79;Q9HC56-2	Q9HC56;Q5VT82;B7ZM79;Q9HC56-2	Protocadherin-9	PCDH9	sp|Q9HC56|PCDH9_HUMAN Protocadherin-9 OS=Homo sapiens (Human) OX=9606 GN=PCDH9 PE=1 SV=2;tr|Q5VT82|Q5VT82_HUMAN Isoform of Q9HC56, Protocadherin-9 OS=Homo sapiens (Human) OX=9606 GN=PCDH9 PE=1 SV=1;tr|B7ZM79|B7ZM79_HUMAN Isoform of Q9HC56, PCDH9 protein OS	16222	8693	13518	8705.6	11404	11905	15329	9183	13521	9093.2	11526	11480	4	14.0079	13.1695	13.7628	13.1034	13.3848	13.4696	-0.471	1.68447	1.39481	13.483	-2.92146	-4.46075				keep	2			3	2	2	3	3	136.06	0	15.22	15359000	2	1237	2	2
Q16891-2;Q16891;B9A067;Q16891-3;D6RAW4	Q16891-2;Q16891;B9A067;Q16891-3	MICOS complex subunit MIC60	IMMT	sp|Q16891-2|MIC60-2_HUMAN Isoform of Q16891, Isoform 2 of MICOS complex subunit MIC60 OS=Homo sapiens (Human) OX=9606 GN=IMMT PE=1 SV=1;sp|Q16891|MIC60_HUMAN MICOS complex subunit MIC60 OS=Homo sapiens (Human) OX=9606 GN=IMMT PE=1 SV=1;tr|B9A067|B9A067_HUM	8176500	5553700	7677100	5017800	6766200	5506200	7732300	5731000	7718400	5239200	6786000	5345400	5	22.9853	22.4889	22.9123	22.2743	22.5975	22.323	-0.469633	2.56181	2.08014	22.5969	-4.38214	-2.30724				keep	37			56.4	37	1	56.4	3.3	82.624	0	153.2	22667000000	62	747	59	59
Q08ER8;Q9BSG1-3;P17014-3;Q8NB42-2;Q3ZCX4-2;P52742-2;P52740-2;Q8N9M3;Q9BSG1-4;Q2M3X9-2;F5H630;Q8IVP9-2;P52742-3;A0A3B3ISA9;C9J6L6;P51523;Q68CY6;A0A087WYR5;P17021-3;P17014-5;P17021-2;A0A0A0MS50;E7EQD3;Q86T29-2;P52742-4;Q96RE9-3;A0A1W2PPT3;F5H6R4;A0A0C4DGP9;A0A087X0M6;P17014-2;Q96RE9-4;P17014-4;Q9P0L1;P17014;Q96RE9;A8MQ14;Q5TYW1;Q2M3X9;Q96I27;Q9Y2H8;Q3ZCX4;Q86T29;P52742;Q9HCX3;P49910;Q6ZMS4;Q9BSG1;P…	Q08ER8	Zinc finger protein 543	ZNF543	sp|Q08ER8|ZN543_HUMAN Zinc finger protein 543 OS=Homo sapiens (Human) OX=9606 GN=ZNF543 PE=1 SV=3	139700	88758	134500	96901	128130	101160	132090	92234	134840	100550	128490	98301	59	17.1142	16.5215	17.0774	16.5799	16.8748	16.5566	-0.469467	3.72378	2.94053	16.7874	-6.78712	0.617082				keep	2			4	4	2	8.5	4	68.403	0.00059046	2.485	28993000	2	600	2	2
Q96A19	Q96A19	Coiled-coil domain-containing protein 102A	CCDC102A	sp|Q96A19|C102A_HUMAN Coiled-coil domain-containing protein 102A OS=Homo sapiens (Human) OX=9606 GN=CCDC102A PE=1 SV=2	27984	18976	26999	19754	29139	21239	26463	19592	27143	20562	29078	20691	1	14.7945	14.2958	14.7608	14.2856	14.7382	14.3048	-0.4691	5.1512	3.96072	14.53	-10.9606	4.21758				keep	2			3.8	2	2	3.8	3.8	62.595	0.00012723	3.8098	19416000	2	550	2	2
Q5K4L6;X6R3N0;Q5K4L6-2;H7BZH4;Q5K4L6-3;H0YDM5;H0YDP0	Q5K4L6;X6R3N0;Q5K4L6-2	Long-chain fatty acid transport protein 3	SLC27A3	sp|Q5K4L6|S27A3_HUMAN Solute carrier family 27 member 3 OS=Homo sapiens (Human) OX=9606 GN=SLC27A3 PE=2 SV=4;tr|X6R3N0|X6R3N0_HUMAN Isoform of Q5K4L6, Solute carrier family 27 (Fatty acid transporter), member 3, isoform CRA_d OS=Homo sapiens (Human) OX=960	87541	61413	83795	59687	96526	69951	82794	63197	84374	62455	96089	68159	7	16.4399	15.9901	16.3947	15.8808	16.4662	16.0244	-0.4685	4.44612	3.47018	16.1994	-8.69034	2.44326				keep	5			12.4	5	5	12.4	12.4	73.55	0	55.664	79005000	5	683	4	4
Q99755-2;A6PW57;Q99755-3;Q99755;Q99755-4;A2A5X0;A6PW58;O14986;O14986-3;O14986-2	Q99755-2;A6PW57;Q99755-3;Q99755;Q99755-4	Phosphatidylinositol 4-phosphate 5-kinase type-1 alpha	PIP5K1A	sp|Q99755-2|PI51A-2_HUMAN Isoform of Q99755, Isoform 2 of Phosphatidylinositol 4-phosphate 5-kinase type-1 alpha OS=Homo sapiens (Human) OX=9606 GN=PIP5K1A PE=1 SV=1;tr|A6PW57|A6PW57_HUMAN Isoform of Q99755, PIPK domain-containing protein OS=Homo sapiens (	863290	576570	843320	528700	725100	627400	816340	596290	845410	553820	727990	607980	10	19.7417	19.221	19.7259	19.0278	19.3754	19.1894	-0.468267	2.58352	2.09579	19.3802	-4.42137	-2.25308				keep	12			30.6	12	6	30.6	14	56.052	0	77.462	706450000	17	500	17	17
Q2VWP7;H0YLT7;H0YLD1	Q2VWP7;H0YLT7;H0YLD1	Protogenin	PRTG	sp|Q2VWP7|PRTG_HUMAN Protogenin OS=Homo sapiens (Human) OX=9606 GN=PRTG PE=2 SV=1;tr|H0YLT7|H0YLT7_HUMAN Isoform of Q2VWP7, Ig-like domain-containing protein OS=Homo sapiens (Human) OX=9606 GN=PRTG PE=1 SV=1;tr|H0YLD1|H0YLD1_HUMAN Isoform of Q2VWP7, Protog	19117	14694	21754	15745	24086	15687	18086	15034	21830	16420	23956	15343	3	14.2448	13.9268	14.4492	13.9583	14.4635	13.8676	-0.468267	3.7375	2.94805	14.1517	-6.8199	0.651765				keep	2			2.8	2	2	2.8	2.8	127.07	0	7.258	3600200	2	1150	2	2
Q14012;C9JES6	Q14012;C9JES6	Calcium/calmodulin-dependent protein kinase type 1	CAMK1	sp|Q14012|KCC1A_HUMAN Calcium/calmodulin-dependent protein kinase type 1 OS=Homo sapiens (Human) OX=9606 GN=CAMK1 PE=1 SV=1;tr|C9JES6|C9JES6_HUMAN Isoform of Q14012, Protein kinase domain-containing protein (Fragment) OS=Homo sapiens (Human) OX=9606 GN=CAM	150210	113420	155360	114500	197880	128860	142100	116060	156470	119920	196240	126040	2	17.2188	16.8752	17.2854	16.8207	17.5019	16.9058	-0.468133	3.42117	2.71682	17.1013	-6.09299	-0.147811				keep	2			7.3	4	2	14.9	7.3	41.337	0.00012398	3.3292	20310000	3	370	3	3
P00395	P00395	Cytochrome c oxidase subunit 1	MT-CO1	sp|P00395|COX1_HUMAN Cytochrome c oxidase subunit 1 OS=Homo sapiens (Human) OX=9606 GN=MT-CO1 PE=1 SV=1	123050	74530	123500	95117	120230	93553	116320	77889	123470	98202	120690	90945	1	16.9311	16.2694	16.9543	16.5531	16.783	16.4439	-0.467333	3.21248	2.55961	16.6558	-5.64462	-0.674475				keep	2			9.4	2	2	9.4	9.4	57.041	0	14.554	148240000	5	513	5	5
Q96AD5	Q96AD5	Patatin-like phospholipase domain-containing protein 2	PNPLA2	sp|Q96AD5|PLPL2_HUMAN Patatin-like phospholipase domain-containing protein 2 OS=Homo sapiens (Human) OX=9606 GN=PNPLA2 PE=1 SV=1	24532	14939	20312	14698	19756	16295	23192	15558	20459	15259	19822	15813	1	14.6046	13.9507	14.3502	13.859	14.1776	13.9225	-0.466733	2.68316	2.17341	14.1441	-4.60373	-2.00418				keep	2			8.5	2	2	8.5	8.5	55.315	0	20.81	51377000	2	504	2	2
O75487;O75487-2	O75487;O75487-2	Glypican-4;Secreted glypican-4	GPC4	sp|O75487|GPC4_HUMAN Glypican-4 OS=Homo sapiens (Human) OX=9606 GN=GPC4 PE=1 SV=4;sp|O75487-2|GPC4-2_HUMAN Isoform of O75487, Isoform 2 of Glypican-4 OS=Homo sapiens (Human) OX=9606 GN=GPC4 PE=1 SV=4	3558600	2458400	3370900	2287500	3189400	2474800	3365500	2533100	3391700	2386100	3192100	2406000	2	21.7851	21.3132	21.7249	21.1411	21.5124	21.1692	-0.4663	3.20876	2.55749	21.441	-5.63686	-0.683831				keep	20			47.1	20	19	47.1	44.1	62.411	0	167.8	6513700000	41	556	36	36
Q86UP3-2;E7EVZ1;Q86UP3-5;Q86UP3;Q86UP3-4;E5RI93;Q86UP3-3;A0A494BZV7;H0YC81;H0YBV0;E5RGK3;E5RHS1;E5RG79	Q86UP3-2;E7EVZ1;Q86UP3-5;Q86UP3;Q86UP3-4;E5RI93	Zinc finger homeobox protein 4	ZFHX4	sp|Q86UP3-2|ZFHX4-2_HUMAN Isoform of Q86UP3, Isoform 2 of Zinc finger homeobox protein 4 OS=Homo sapiens (Human) OX=9606 GN=ZFHX4 PE=1 SV=1;tr|E7EVZ1|E7EVZ1_HUMAN Isoform of Q86UP3, Zinc finger homeobox protein 4 OS=Homo sapiens (Human) OX=9606 GN=ZFHX4 PE	487170	341140	477820	345930	543100	389700	460750	351120	480650	361100	540910	379850	13	18.9163	18.4639	18.9063	18.4158	18.9584	18.5024	-0.4663	4.89279	3.78945	18.6938	-10.0714	3.5665				keep	18			7.1	23	18	8.5	7.1	397.31	0	129.24	220450000	18	3599	18	17
[truncated: 8,785 more rows]
[truncated: 15 more columns]

## Sheet: down
Gene Names downregulation
CGNL1	L1TD1
AGK	KIAA1191
GRPEL2	ARMC1
SLC25A22	KLHL5
SIGMAR1	HCG18
HIST2H3A	SYNJ2BP
[truncated: 423 more rows]

## Sheet: up
Gene Names upregulation
[truncated: 302 more rows]

[truncated: 1 more sheets: protein and RNA]
