# Supplementary material for: The domesticated transposon protein L1TD1 associates with its ancestor L1 ORF1p to promote LINE-1 retrotransposition
Source: eLife. 2025 Mar 20;13:RP96850. doi: 10.7554/eLife.96850 (PMC11925450; doi:10.7554/eLife.96850)
Supplement: Supplementary file 5. [file elife-96850-supp5.xlsx]

## Sheet: Info
GEO GSE254460
Summary of differential gene expression analysis: The worksheet shows results obtained by DESeq2 analysis of HAP1 DNMT1 L1TD1 DKO versus HAP1 DNMT1 KO cells. RNA-seq experiment were performed using biological triplicates.
Column Name	Description
Gene ID	Ensembl gene id
Gene name	Gene name
basemean	average of normalize count values, dividing by size factors taken over all samples
logFC	Fold change (log2) over DNMT1 KO cells
lfcSE	Standard error estimate for the log2 fold change estimate
P value	p value
adj pvalue	adjusted p value
logfc shrunken	shrinkage estimation for dispersions and fold changes to improve stability and interpretability of estimates
Data analysis was explained in Materials and Methods section

## Sheet: Sheet 1
gene_id	gene_name	baseMean	log2FoldChange	lfcSE	stat	pvalue	padj	log2FoldChange.shrunk	sign
ENSG00000168754	FAM178B	181.98	9.14683	1.06484	8.58983	8.70994e-18	3.22711e-15	4.87816	up
ENSG00000172716	SLFN11	36.9163	8.70784	1.25842	6.91966	4.5274e-12	8.46416e-10	3.04126	up
ENSG00000206052	DOK6	61.5365	8.47635	1.2196	6.95013	3.64958e-12	6.95057e-10	3.87332	up
ENSG00000104689	TNFRSF10A	94.8406	8.20314	1.0624	7.72135	1.15101e-14	3.21306e-12	4.29357	up
ENSG00000250486	FAM218A	25.4564	8.16745	1.27055	6.42826	1.29074e-10	1.91991e-08	2.66727	up
ENSG00000134873	CLDN10	76.4198	7.89594	1.07489	7.3458	2.04526e-13	4.9617e-11	3.91982	up
ENSG00000180730	SHISA2	12.8915	7.19004	1.36136	5.28152	1.28118e-07	1.15521e-05	1.71528	up
ENSG00000163071	SPATA18	11.3794	6.99975	1.45998	4.79442	1.63148e-06	0.000113082	1.28192	up
ENSG00000248685	LINC02484	11.1148	6.97324	1.37921	5.05596	4.28242e-07	3.42224e-05	1.57655	up
ENSG00000179542	SLITRK4	104.292	6.7638	1.23853	5.46117	4.73012e-08	4.70197e-06	1.0036	up
ENSG00000240519		9.3689	6.721	1.56649	4.2905	1.78274e-05	0.000894796	0.967976	up
ENSG00000286654		9.2723	6.71428	1.40455	4.78038	1.74962e-06	0.000120452	1.41582	up
ENSG00000174607	UGT8	598.278	6.60537	0.292262	22.6009	4.24734e-113	4.32761e-109	5.62978	up
ENSG00000228590	MIR4432HG	8.2207	6.53236	1.47078	4.44143	8.93636e-06	0.000508674	1.17225	up
ENSG00000223914	LINC02471	8.02387	6.49461	1.56221	4.15733	3.21995e-05	0.00151189	0.952613	up
ENSG00000228778		7.80868	6.4657	1.45017	4.45859	8.25011e-06	0.000478977	1.21851	up
ENSG00000228100	LINC01820	15.1902	6.45135	1.33332	4.83857	1.30776e-06	9.22129e-05	1.85799	up
ENSG00000187600	LINC02583	7.42995	6.38849	1.48423	4.30425	1.67556e-05	0.000853612	1.11362	up
ENSG00000184368	MAP7D2	455.339	6.3235	0.298256	21.2016	9.23785e-100	4.70622e-96	5.36366	up
ENSG00000242221	PSG2	5.78233	6.02225	1.64113	3.66957	0.000242957	0.00825163	0.772005	up
ENSG00000242781	LINC02050	5.30838	5.90417	1.60216	3.68513	0.000228583	0.00789503	0.81815	up
ENSG00000236388	ITCH-AS1	5.32365	5.90401	1.60911	3.66912	0.000243389	0.00825253	0.807187	up
ENSG00000056291	NPFFR2	38.304	5.88374	0.835527	7.04195	1.89563e-12	3.86292e-10	2.88625	up
ENSG00000227674	LINC00355	27.702	5.8128	0.973897	5.9686	2.39303e-09	3.0102e-07	2.40094	up
ENSG00000237849	NFYAP1	4.90243	5.79155	1.57708	3.67232	0.000240357	0.00820435	0.844229	up
ENSG00000177551	NHLH2	115.192	5.76425	0.486751	11.8423	2.35902e-32	1.92288e-29	4.02324	up
ENSG00000163565	IFI16	4.76161	5.75417	1.59101	3.61667	0.000298413	0.00974528	0.818664	up
ENSG00000224167	LINC01357	9.42404	5.7486	1.39185	4.1302	3.62455e-05	0.00165608	1.38836	up
ENSG00000119919	NKX2-3	86.165	5.72736	0.547194	10.4668	1.22737e-25	6.94761e-23	3.75737	up
ENSG00000169252	ADRB2	4.59289	5.69226	1.69256	3.3631	0.000770718	0.0207747	0.678319	up
ENSG00000226652	PSMD10P2	4.59079	5.68767	1.76218	3.22763	0.00124818	0.0299241	0.604884	up
ENSG00000196564	BLOC1S6P1	4.58732	5.68631	1.75637	3.23753	0.00120571	0.0292151	0.610388	up
ENSG00000277879		4.33711	5.61251	1.76239	3.18461	0.0014495	0.0334911	0.600217	up
ENSG00000251279	SMIM15-AS1	23.5656	5.58726	0.986876	5.66157	1.49999e-08	1.67949e-06	2.23702	up
ENSG00000230947		8.44906	5.58017	1.44587	3.85939	0.00011367	0.0043481	1.17516	up
ENSG00000286904		4.25403	5.57983	1.67031	3.34059	0.000836003	0.0220961	0.69402	up
ENSG00000165168	CYBB	4.22925	5.57483	1.82067	3.06196	0.0021989	0.0453075	0.54667	up
ENSG00000013297	CLDN11	313.998	5.54807	0.305711	18.1481	1.32899e-73	5.41644e-70	4.63032	up
ENSG00000169715	MT1E	328.084	5.5451	0.312077	17.7684	1.24234e-70	4.2194e-67	4.58651	up
ENSG00000251504	LINC01099	7.97357	5.49581	1.70427	3.22473	0.00126091	0.0300654	0.679133	up
ENSG00000134330	IAH1	43.333	5.46205	0.703721	7.76168	8.38144e-15	2.40559e-12	2.99292	up
ENSG00000287837		3.87148	5.45179	1.6757	3.25344	0.00114017	0.0279596	0.676621	up
ENSG00000260228		7.64702	5.43146	1.5669	3.46637	0.000527534	0.0154433	0.876674	up
ENSG00000251676	SNHG27	27.5663	5.39446	0.861046	6.265	3.72817e-10	5.23835e-08	2.46632	up
ENSG00000240934		7.30041	5.36675	1.6977	3.16118	0.00157131	0.0357367	0.677051	up
ENSG00000253520		6.95323	5.31371	1.53473	3.46231	0.000535562	0.0156133	0.924398	up
ENSG00000146802	TMEM168	78.1685	5.30955	0.505259	10.5086	7.88787e-26	4.59254e-23	3.6165	up
ENSG00000241744		6.86838	5.27369	1.73871	3.0331	0.00242058	0.0480297	0.621325	up
ENSG00000223445	RPL6P21	6.84222	5.26943	1.6349	3.2231	0.00126813	0.0301189	0.748695	up
ENSG00000286622		6.73387	5.24752	1.71719	3.05587	0.00224407	0.0460521	0.64447	up
ENSG00000246662	CIBAR1-DT	43.7555	5.24393	1.46772	3.57283	0.000353143	0.0112093	0.610762	up
ENSG00000289369		6.50635	5.1944	1.58933	3.26829	0.001082	0.0268891	0.8098	up
ENSG00000258181		6.26199	5.13807	1.56829	3.27623	0.00105205	0.0263374	0.836155	up
ENSG00000118231	CRYGD	11.0725	5.06924	1.27877	3.96415	7.36589e-05	0.00297232	1.32699	up
ENSG00000170624	SGCD	32.8649	5.04629	0.733651	6.87833	6.05583e-12	1.1123e-09	2.57363	up
ENSG00000137871	ZNF280D	31.4731	4.98931	0.73089	6.82636	8.70982e-12	1.5707e-09	2.56103	up
ENSG00000144837	PLA1A	5.64672	4.98297	1.63694	3.04408	0.00233394	0.0470641	0.715602	up
ENSG00000262471		5.56622	4.96058	1.59187	3.11621	0.00183194	0.0398413	0.773161	up
ENSG00000202019	ENSG00000202019|Y_RNA	5.54854	4.95743	1.62574	3.04934	0.00229345	0.0466891	0.725648	up
ENSG00000241098	LINC01994	10.2427	4.93977	1.43063	3.45285	0.000554692	0.0161163	0.922528	up
ENSG00000260289		14.3068	4.8468	1.0375	4.6716	2.98869e-06	0.000193345	1.69715	up
ENSG00000267872		9.45971	4.82217	1.54547	3.1202	0.00180729	0.0394313	0.727631	up
ENSG00000251516		16.856	4.64432	1.07198	4.33248	1.47442e-05	0.000767895	1.31658	up
ENSG00000280317		10.967	4.41961	1.31109	3.37094	0.000749115	0.0203232	0.875669	up
ENSG00000267374	MIR924HG	60.4651	4.40787	0.470391	9.37066	7.20805e-21	3.33831e-18	3.03561	up
ENSG00000287375		10.7034	4.39426	1.38162	3.18052	0.0014701	0.0338505	0.770623	up
ENSG00000236451		10.7058	4.39176	1.39858	3.14015	0.0016886	0.037261	0.747534	up
ENSG00000188725	SMIM15	121.452	4.37446	0.363144	12.0461	2.03409e-33	1.97384e-30	3.39996	up
ENSG00000237734		17.2052	4.34077	1.09276	3.97229	7.11847e-05	0.0028839	1.11591	up
ENSG00000271538	LINC02427	10.3281	4.33722	1.40248	3.09253	0.00198456	0.0420826	0.736125	up
ENSG00000165091	TMC1	100.434	4.31406	0.363703	11.8615	1.87565e-32	1.59259e-29	3.36621	up
ENSG00000232100	LINC01653	21.7658	4.18688	0.932187	4.49146	7.0738e-06	0.00042397	1.37068	up
ENSG00000156269	NAA11	18.2285	4.17872	0.886438	4.71406	2.42827e-06	0.000161915	1.55756	up
ENSG00000249464	LINC01091	11.5175	4.05843	1.11838	3.62884	0.000284695	0.00941806	1.06589	up
ENSG00000164736	SOX17	22.5922	4.053	0.701266	5.77955	7.49016e-09	8.8741e-07	2.03676	up
ENSG00000235387	SPAAR	8.56072	4.05207	1.33512	3.03499	0.00240546	0.0478229	0.786246	up
ENSG00000223727		22.3767	4.02347	0.988129	4.07181	4.66495e-05	0.00202691	1.16416	up
ENSG00000265158	LRRC37A7P	10.721	3.97089	1.20863	3.28544	0.00101822	0.0255849	0.891752	up
ENSG00000283698	VINAC1P	8.09057	3.95867	1.29837	3.04895	0.00229646	0.0467038	0.820824	up
ENSG00000148848	ADAM12	13.2715	3.9428	1.0354	3.80801	0.000140088	0.00517159	1.14807	up
ENSG00000197465	GYPE	13.0369	3.9366	0.899406	4.37689	1.20387e-05	0.000654198	1.49719	up
ENSG00000254300	LINC01111	17.5803	3.8807	0.825317	4.70207	2.5754e-06	0.000169843	1.57902	up
ENSG00000184347	SLIT3	7.45088	3.84998	1.19049	3.23395	0.00122091	0.0295133	0.980257	up
ENSG00000226197		17.0325	3.83649	1.11119	3.45261	0.000555189	0.0161163	0.921552	up
ENSG00000280117		14.8673	3.82773	1.06932	3.5796	0.000344116	0.010974	1.0102	up
ENSG00000287069		7.29901	3.82007	1.20357	3.17394	0.00150384	0.0344328	0.950141	up
ENSG00000250244		11.6651	3.75151	0.958158	3.91534	9.02786e-05	0.00354469	1.27075	up
ENSG00000246582	TNFRSF10A-DT	17.4941	3.65161	0.767564	4.7574	1.96103e-06	0.0001341	1.61531	up
ENSG00000173193	PARP14	125.274	3.64196	0.303659	11.9936	3.8386e-33	3.55559e-30	3.01883	up
ENSG00000173626	TRAPPC3L	17.3627	3.641	0.970174	3.75293	0.000174779	0.00631496	1.10921	up
ENSG00000271192		23.3738	3.59999	0.693653	5.1899	2.10409e-07	1.81682e-05	1.74691	up
ENSG00000137674	MMP20	14.7037	3.58039	1.07232	3.33891	0.000841064	0.022201	0.929447	up
ENSG00000224812	TMEM72-AS1	8.06292	3.53502	1.12124	3.15279	0.00161719	0.0362144	0.942922	up
ENSG00000260073		8.02752	3.52985	1.09934	3.21088	0.0013233	0.0313197	0.979008	up
ENSG00000180708	OR10K2	32.31	3.52284	0.811777	4.33967	1.42699e-05	0.000753404	1.3374	up
ENSG00000278513		9.9714	3.49665	1.13761	3.07369	0.0021143	0.0442354	0.860386	up
ENSG00000075223	SEMA3C	35.4528	3.49008	0.73906	4.72232	2.33166e-06	0.000157856	1.50168	up
ENSG00000224074	LINC00691	9.65851	3.46964	1.10916	3.12817	0.00175898	0.0385012	0.901386	up
ENSG00000257831		9.43455	3.42805	1.0502	3.26421	0.00109771	0.0271488	0.98708	up
ENSG00000131844	MCCC2	50.128	3.39603	0.46391	7.32046	2.47131e-13	5.92475e-11	2.29311	up
ENSG00000119125	GDA	18.4412	3.37479	0.866569	3.89442	9.84324e-05	0.00382797	1.21372	up
ENSG00000138772	ANXA3	30.8651	3.36934	0.549447	6.13224	8.66525e-10	1.15412e-07	2.02918	up
ENSG00000175779	LINC02694	21.9114	3.36423	0.928711	3.62248	0.000291797	0.00960619	1.06722	up
ENSG00000106823	ECM2	12.6041	3.36082	0.842942	3.98701	6.69106e-05	0.00274347	1.3261	up
ENSG00000178445	GLDC	77.6752	3.25753	0.437117	7.45231	9.17204e-14	2.42738e-11	2.26359	up
ENSG00000184774	MGAT4EP	13.3886	3.21303	1.06397	3.01986	0.00252895	0.0493631	0.84628	up
ENSG00000234456	MAGI2-AS3	43.9311	3.20447	0.578031	5.54377	2.9602e-08	3.01614e-06	1.80386	up
ENSG00000140853	NLRC5	99.1709	3.1923	0.312874	10.2032	1.91932e-24	1.02926e-21	2.61468	up
ENSG00000121904	CSMD2	17.8841	3.18145	0.891409	3.56902	0.000358326	0.0113209	1.09242	up
ENSG00000076356	PLXNA2	7.97012	3.16274	1.01697	3.10996	0.00187113	0.0404775	0.97031	up
ENSG00000206337	HCP5	80.9228	3.12825	0.351558	8.89825	5.67361e-19	2.267e-16	2.44577	up
ENSG00000279221		14.2177	3.124	0.988962	3.15887	0.00158384	0.0359416	0.925317	up
ENSG00000250422		18.5585	3.11843	1.03101	3.02463	0.00248934	0.0488937	0.844052	up
ENSG00000259817		20.1145	3.11762	0.971377	3.20949	0.00132972	0.0313622	0.926068	up
ENSG00000259664	LINC02254	19.791	3.07623	0.750232	4.10037	4.12497e-05	0.00184339	1.33635	up
ENSG00000281392	LINC00506	34.5801	3.06368	0.821381	3.72991	0.000191546	0.00681209	1.14221	up
ENSG00000279864	NCOR1P4	22.1296	3.02399	0.743314	4.06825	4.73673e-05	0.00204937	1.31766	up
ENSG00000179008	C14orf39	17.4728	3.02282	0.683365	4.42344	9.71418e-06	0.000540862	1.48759	up
ENSG00000172936	MYD88	33.2746	3.01126	0.567772	5.30363	1.1352e-07	1.03736e-05	1.7355	up
ENSG00000237224		18.7089	3.00209	0.971666	3.08963	0.00200405	0.0423624	0.896265	up
ENSG00000237174		19.9246	2.96672	0.945247	3.13857	0.00169774	0.0374016	0.921381	up
ENSG00000154678	PDE1C	26.6331	2.94199	0.733341	4.01176	6.02666e-05	0.00250125	1.29021	up
ENSG00000181481	RNF135	17.8934	2.90028	0.799464	3.62778	0.000285864	0.0094414	1.15921	up
ENSG00000165186	PTCHD1	35.4156	2.89742	0.513227	5.64549	1.64711e-08	1.82418e-06	1.81371	up
ENSG00000279099		9.47202	2.89456	0.935022	3.09572	0.00196339	0.0419391	0.973804	up
ENSG00000236924		33.4724	2.87256	0.587551	4.88904	1.01328e-06	7.34827e-05	1.59784	up
ENSG00000047648	ARHGAP6	19.8675	2.84719	0.883335	3.22323	0.00126755	0.0301189	0.981006	up
ENSG00000121895	TMEM156	26.376	2.83825	0.828251	3.4268	0.000610742	0.0174066	1.05912	up
ENSG00000107518	ATRNL1	45.6429	2.81563	0.688131	4.0917	4.28219e-05	0.0018929	1.31131	up
ENSG00000216811		37.2329	2.80018	0.786612	3.55979	0.000371146	0.0116126	1.10959	up
ENSG00000286871		26.0859	2.68785	0.656513	4.09414	4.23737e-05	0.00187716	1.34289	up
ENSG00000236790	LINC00299	19.7619	2.63847	0.799565	3.29988	0.000967272	0.0247316	1.04636	up
ENSG00000287087		37.3962	2.63307	0.791643	3.32609	0.000880738	0.0229804	1.03725	up
ENSG00000185905	C16orf54	17.0352	2.5801	0.832381	3.09967	0.00193739	0.041558	0.974082	up
ENSG00000144451	SPAG16	369.845	2.56671	0.210651	12.1847	3.75138e-34	3.82228e-31	2.329	up
ENSG00000053108	FSTL4	126.734	2.5378	0.360629	7.03714	1.96229e-12	3.95916e-10	1.95151	up
ENSG00000125726	CD70	197.31	2.53748	0.374907	6.7683	1.30308e-11	2.26959e-09	1.91259	up
ENSG00000156113	KCNMA1	27.0804	2.53421	0.829208	3.05618	0.00224176	0.046051	0.947976	up
ENSG00000247287	PRKCH-AS1	31.7689	2.53246	0.806517	3.13999	0.00168953	0.037261	0.978899	up
ENSG00000279175		79.6963	2.51805	0.347974	7.23633	4.60978e-13	1.03229e-10	1.97148	up
ENSG00000125798	FOXA2	19.2932	2.51119	0.636846	3.94316	8.04135e-05	0.00321307	1.30629	up
ENSG00000272754		16.1275	2.51079	0.721123	3.48178	0.000498101	0.014818	1.14388	up
ENSG00000238129		25.4317	2.49892	0.56709	4.40657	1.05022e-05	0.000578417	1.44251	up
ENSG00000247151	CSTF3-DT	17.08	2.49609	0.758804	3.2895	0.00100366	0.0253126	1.06483	up
ENSG00000133392	MYH11	30.9912	2.48956	0.59988	4.15009	3.32347e-05	0.00155334	1.35419	up
ENSG00000134539	KLRD1	29.7863	2.48857	0.7893	3.15288	0.00161671	0.0362144	0.991842	up
ENSG00000086288	NME8	17.9193	2.47175	0.733316	3.37065	0.000749923	0.0203232	1.09806	up
ENSG00000189056	RELN	36.7534	2.45962	0.756362	3.25191	0.00114633	0.0280768	1.0311	up
ENSG00000286215		39.541	2.45559	0.636932	3.85534	0.00011557	0.00440203	1.25243	up
ENSG00000163380	LMOD3	26.5437	2.41932	0.701584	3.44836	0.000563993	0.0163022	1.11799	up
ENSG00000265994		17.3354	2.41388	0.796389	3.03103	0.00243717	0.0481247	0.966438	up
ENSG00000003402	CFLAR	107.269	2.40866	0.3795	6.34694	2.19636e-10	3.17429e-08	1.80688	up
ENSG00000149294	NCAM1	37.2294	2.40121	0.451226	5.32152	1.02902e-07	9.44568e-06	1.64078	up
ENSG00000196126	HLA-DRB1	14.5985	2.34187	0.706229	3.31602	0.000913091	0.0236429	1.095	up
ENSG00000151136	BTBD11	26.1742	2.33094	0.521133	4.47283	7.71917e-06	0.000455946	1.44069	up
ENSG00000266602		23.7008	2.2972	0.720342	3.18904	0.00142744	0.0331302	1.03254	up
ENSG00000273447		14.7988	2.26985	0.703582	3.22614	0.00125473	0.0300457	1.06543	up
ENSG00000279443		50.9113	2.24946	0.52038	4.32272	1.54115e-05	0.000795076	1.37869	up
ENSG00000268628		40.4144	2.24905	0.502244	4.47801	7.53435e-06	0.000446323	1.42121	up
ENSG00000248663	LINC00992	20.2648	2.24333	0.629223	3.56525	0.000363515	0.011414	1.17421	up
ENSG00000115297	TLX2	46.4768	2.22748	0.398702	5.58684	2.31241e-08	2.46089e-06	1.63408	up
ENSG00000204397	CARD16	23.5744	2.21127	0.565334	3.91144	9.17473e-05	0.00358232	1.27666	up
ENSG00000145287	PLAC8	24.1291	2.19151	0.699175	3.13443	0.00172188	0.0378517	1.01937	up
ENSG00000278920		25.0851	2.18921	0.68532	3.19443	0.00140109	0.0327048	1.0405	up
ENSG00000236117	LINC01639	119.963	2.1833	0.293816	7.43084	1.07912e-13	2.81926e-11	1.82185	up
ENSG00000272121		206.819	2.17421	0.263151	8.26224	1.42965e-16	4.77598e-14	1.87517	up
ENSG00000154274	C4orf19	43.1758	2.15114	0.500201	4.30055	1.70372e-05	0.000863641	1.36151	up
ENSG00000227195	MIR663AHG	57.3764	2.14704	0.407954	5.26296	1.41757e-07	1.26698e-05	1.55278	up
ENSG00000146833	TRIM4	90.2407	2.14444	0.306143	7.0047	2.47511e-12	4.84979e-10	1.76528	up
ENSG00000261087	ZNNT1	39.2737	2.13957	0.578252	3.70007	0.000215538	0.00753386	1.20036	up
ENSG00000196335	STK31	28.942	2.11119	0.493701	4.27625	1.90071e-05	0.000944698	1.35638	up
ENSG00000082556	OPRK1	17.0511	2.10555	0.676718	3.11141	0.00186196	0.040322	1.02368	up
ENSG00000070915	SLC12A3	21.879	2.09532	0.571783	3.66453	0.000247795	0.00838797	1.19894	up
ENSG00000122420	PTGFR	69.0619	2.09123	0.323977	6.45488	1.08302e-10	1.62278e-08	1.6863	up
ENSG00000289575		95.3741	2.07629	0.343845	6.03846	1.55594e-09	1.99415e-07	1.63229	up
ENSG00000074706	IPCEF1	23.1723	2.05373	0.606387	3.38683	0.000707044	0.0195497	1.11099	up
ENSG00000198873	GRK5	47.7525	2.04369	0.457954	4.46266	8.09489e-06	0.000471307	1.37664	up
ENSG00000162374	ELAVL4	30.1742	2.03032	0.521409	3.89391	9.86405e-05	0.00382876	1.24886	up
ENSG00000183783	KCTD8	18.5666	2.01818	0.611372	3.30107	0.000963181	0.0246579	1.08771	up
ENSG00000231421		113.669	2.012	0.266197	7.55831	4.08348e-14	1.1245e-11	1.73063	up
ENSG00000203805	PLPP4	38.6123	1.99411	0.488195	4.08466	4.41414e-05	0.00193028	1.28612	up
ENSG00000101349	PAK5	17.2627	1.9684	0.640486	3.07329	0.00211711	0.0442488	1.01411	up
ENSG00000260388	LINC00562	19.5419	1.94874	0.618463	3.15094	0.00162748	0.0362854	1.03553	up
ENSG00000225885		33.3772	1.93087	0.612221	3.15388	0.00161118	0.0362144	1.0288	up
ENSG00000242488		39.1988	1.93055	0.630272	3.06304	0.00219098	0.0451901	0.998685	up
ENSG00000002587	HS3ST1	24.4334	1.91913	0.607787	3.15757	0.00159092	0.035982	1.03428	up
ENSG00000021826	CPS1	38.3121	1.91169	0.461362	4.14359	3.41917e-05	0.00157843	1.28327	up
ENSG00000204264	PSMB8	29.5684	1.90633	0.576344	3.30763	0.000940897	0.0242091	1.07805	up
ENSG00000255836		64.9318	1.90117	0.373881	5.08496	3.67707e-07	2.97347e-05	1.43916	up
ENSG00000153064	BANK1	38.5745	1.89151	0.439024	4.30843	1.64415e-05	0.000841821	1.31134	up
ENSG00000140538	NTRK3	70.302	1.88686	0.353664	5.33517	9.54529e-08	8.84154e-06	1.46531	up
ENSG00000198865	CCDC152	208.239	1.8824	0.215784	8.72355	2.69614e-18	1.01744e-15	1.70039	up
ENSG00000183323	CCDC125	32.9361	1.87276	0.486764	3.84737	0.000119394	0.00451394	1.21244	up
ENSG00000117154	IGSF21	27.7305	1.87193	0.507187	3.69082	0.000223537	0.00777343	1.17662	up
ENSG00000140015	KCNH5	65.9178	1.8344	0.407794	4.49834	6.84863e-06	0.000411686	1.32541	up
ENSG00000231976	FAM238B	36.6124	1.83248	0.528466	3.46755	0.000525219	0.0153999	1.11226	up
ENSG00000213621	RPSAP54	149.197	1.81571	0.361525	5.02236	5.10407e-07	3.98508e-05	1.39436	up
ENSG00000223416	RPS26P15	93.3162	1.81451	0.483775	3.75074	0.000176315	0.00635921	1.17453	up
ENSG00000143355	LHX9	51.2918	1.79626	0.404644	4.43911	9.03319e-06	0.000511329	1.30543	up
ENSG00000145721	LIX1	24.8705	1.78178	0.513532	3.46965	0.000521133	0.0153242	1.11044	up
ENSG00000147036	LANCL3	20.5622	1.77201	0.556028	3.18692	0.00143799	0.0333371	1.03677	up
ENSG00000158050	DUSP2	31.5692	1.75946	0.502552	3.50106	0.000463411	0.0139489	1.11266	up
ENSG00000241743	XACT	624.182	1.74894	0.243019	7.19672	6.16786e-13	1.35149e-10	1.53943	up
ENSG00000017483	SLC38A5	377.247	1.73873	0.24012	7.24109	4.451e-13	1.0078e-10	1.53487	up
ENSG00000169059	VCX3A	765.294	1.71638	0.21081	8.14186	3.89239e-16	1.23936e-13	1.55704	up
ENSG00000128918	ALDH1A2	171.253	1.70723	0.270707	6.30655	2.85319e-10	4.03766e-08	1.46101	up
ENSG00000170627	GTSF1	631.309	1.70472	0.156509	10.8922	1.25628e-27	8.53348e-25	1.6138	up
ENSG00000226792	C13orf42	347.403	1.69467	0.202825	8.35533	6.52479e-17	2.25359e-14	1.54808	up
ENSG00000180353	HCLS1	83.54	1.67202	0.336644	4.96673	6.80913e-07	5.19687e-05	1.32608	up
ENSG00000243279	PRAF2	130.781	1.67075	0.293124	5.69982	1.19932e-08	1.38078e-06	1.3948	up
ENSG00000249655		82.6816	1.65726	0.461603	3.59022	0.000330395	0.0106177	1.10887	up
ENSG00000261761	LINC02616	24.5249	1.65518	0.513296	3.22461	0.00126145	0.0300654	1.03201	up
ENSG00000095574	IKZF5	89.1601	1.65426	0.293083	5.64434	1.65814e-08	1.82647e-06	1.38154	up
ENSG00000198626	RYR2	123.91	1.63288	0.270656	6.03304	1.60901e-09	2.03655e-07	1.39737	up
ENSG00000215196	BASP1-AS1	24.9334	1.63075	0.537613	3.03331	0.0024189	0.0480297	0.978925	up
ENSG00000114115	RBP1	1526.97	1.62997	0.157669	10.3379	4.74745e-25	2.61469e-22	1.54179	up
ENSG00000182165	TP53TG1	33.9192	1.62219	0.501018	3.23779	0.0012046	0.0292151	1.02721	up
ENSG00000189423	USP32P3	42.893	1.61338	0.408696	3.94762	7.89308e-05	0.00316002	1.16596	up
ENSG00000145247	OCIAD2	58.9859	1.6081	0.35982	4.46916	7.85257e-06	0.000462026	1.23948	up
ENSG00000147676	MAL2	184.418	1.58575	0.224877	7.05163	1.76839e-12	3.71507e-10	1.42059	up
ENSG00000244128	LINC01322	76.389	1.58494	0.30344	5.22324	1.75823e-07	1.53116e-05	1.30821	up
ENSG00000116016	EPAS1	41.0173	1.56623	0.475604	3.29315	0.00099073	0.0251421	1.02857	up
ENSG00000163840	DTX3L	51.393	1.56619	0.386022	4.05727	4.96506e-05	0.0021436	1.16633	up
ENSG00000236432	MFF-DT	61.7232	1.5427	0.490584	3.14463	0.00166298	0.0367552	0.989828	up
ENSG00000261786		93.067	1.5376	0.276056	5.56989	2.54904e-08	2.6309e-06	1.30858	up
ENSG00000253706		40.6241	1.53574	0.395425	3.88377	0.00010285	0.00398454	1.13019	up
ENSG00000170430	MGMT	475.447	1.52569	0.230605	6.61601	3.69024e-11	6.06449e-09	1.35923	up
ENSG00000174080	CTSF	87.7243	1.52007	0.335197	4.53486	5.76423e-06	0.000354874	1.20798	up
ENSG00000164161	HHIP	245.021	1.51195	0.202523	7.4656	8.29179e-14	2.25293e-11	1.38162	up
ENSG00000261377	PDCD6IPP2	45.1952	1.50855	0.427476	3.52898	0.000417163	0.0128219	1.06126	up
ENSG00000152377	SPOCK1	111.224	1.49608	0.279042	5.36149	8.25367e-08	7.71529e-06	1.26896	up
ENSG00000130707	ASS1	40.7898	1.4784	0.465589	3.17534	0.00149659	0.0343441	0.985287	up
ENSG00000165806	CASP7	57.3881	1.47486	0.347264	4.24709	2.16567e-05	0.00106342	1.15515	up
ENSG00000064763	FAR2	57.4551	1.46632	0.358814	4.08657	4.37805e-05	0.00192276	1.13134	up
ENSG00000132164	SLC6A11	89.1104	1.46211	0.29468	4.96168	6.98869e-07	5.31401e-05	1.21869	up
ENSG00000165556	CDX2	108.379	1.46182	0.268891	5.43648	5.43436e-08	5.31914e-06	1.25346	up
ENSG00000151640	DPYSL4	90.4726	1.45992	0.338938	4.30732	1.65244e-05	0.000843945	1.15428	up
ENSG00000100181	TPTEP1	391.601	1.4594	0.220205	6.62747	3.41486e-11	5.70393e-09	1.31281	up
ENSG00000196998	WDR45	43.0655	1.44781	0.406594	3.56083	0.000369689	0.01159	1.0492	up
ENSG00000160072	ATAD3B	75.0851	1.42448	0.396069	3.59654	0.000322478	0.0103902	1.04571	up
ENSG00000188620	HMX3	225.036	1.41803	0.365762	3.87691	0.000105791	0.00407527	1.08363	up
ENSG00000125845	BMP2	191.319	1.41376	0.222814	6.34502	2.22392e-10	3.19148e-08	1.26886	up
ENSG00000170381	SEMA3E	182.485	1.4061	0.213348	6.59064	4.37943e-11	7.08286e-09	1.2729	up
ENSG00000172985	SH3RF3	45.6043	1.40243	0.400536	3.50138	0.000462864	0.0139489	1.02429	up
ENSG00000113448	PDE4D	47.8897	1.39777	0.412446	3.38898	0.00070154	0.0194239	1.00399	up
ENSG00000130640	TUBGCP2	713.496	1.36566	0.225315	6.06109	1.35206e-09	1.77757e-07	1.22274	up
ENSG00000143768	LEFTY2	196.603	1.36212	0.218028	6.24746	4.17175e-10	5.78312e-08	1.22782	up
ENSG00000179988	PSTK	50.843	1.35654	0.359812	3.77013	0.000163162	0.00593734	1.0454	up
ENSG00000104325	DECR1	208.353	1.35029	0.299611	4.50681	6.58103e-06	0.000399132	1.11903	up
ENSG00000133678	TMEM254	51.1885	1.34009	0.420134	3.18967	0.00142437	0.0330967	0.952311	up
ENSG00000277959		39.2138	1.31993	0.401522	3.28732	0.00101146	0.0254464	0.963199	up
ENSG00000132975	GPR12	59.8688	1.31424	0.359039	3.66045	0.000251773	0.00847295	1.01351	up
ENSG00000065833	ME1	121.013	1.30453	0.274505	4.75229	2.01125e-06	0.000137074	1.11194	up
ENSG00000049246	PER3	81.908	1.30263	0.348454	3.7383	0.000185266	0.00662342	1.01838	up
ENSG00000283633		518.72	1.30257	0.215477	6.04504	1.49372e-09	1.93879e-07	1.17679	up
ENSG00000086205	FOLH1	87.4915	1.30105	0.368467	3.53099	0.000414001	0.0127633	0.991278	up
ENSG00000197162	ZNF785	101.434	1.30006	0.294694	4.41156	1.02627e-05	0.000566759	1.08357	up
ENSG00000206190	ATP10A	115.023	1.29864	0.268629	4.83434	1.33591e-06	9.38728e-05	1.1137	up
ENSG00000118432	CNR1	49.9648	1.29859	0.36754	3.53319	0.000410582	0.012677	0.99074	up
ENSG00000234465	PINLYP	142.424	1.29368	0.290989	4.44582	8.7557e-06	0.00050119	1.08252	up
ENSG00000162999	DUSP19	85.726	1.27224	0.384701	3.3071	0.000942688	0.0242243	0.948216	up
ENSG00000166501	PRKCB	210.164	1.26809	0.200541	6.32334	2.55965e-10	3.6476e-08	1.16075	up
ENSG00000107949	BCCIP	659.6	1.26533	0.169564	7.46222	8.5078e-14	2.28121e-11	1.18682	up
ENSG00000119965	C10orf88	69.2179	1.26292	0.326534	3.86764	0.000109896	0.00421742	1.0143	up
ENSG00000165669	FAM204A	287.988	1.25982	0.191299	6.58562	4.52992e-11	7.26856e-09	1.16201	up
ENSG00000112343	TRIM38	124.93	1.25808	0.279616	4.49931	6.81756e-06	0.00041103	1.06638	up
ENSG00000205730	ITPRIPL2	55.3162	1.25312	0.352561	3.55434	0.000378924	0.0118069	0.974476	up
ENSG00000166394	CYB5R2	370.114	1.24998	0.194668	6.42109	1.35303e-10	1.99797e-08	1.14973	up
ENSG00000160445	ZER1	63.3147	1.24465	0.344362	3.61437	0.000301076	0.00981651	0.977798	up
ENSG00000197358	BNIP3P1	132.729	1.24426	0.234881	5.29739	1.17467e-07	1.06864e-05	1.10421	up
ENSG00000183605	SFXN4	1144.46	1.24296	0.187246	6.63809	3.17772e-11	5.35171e-09	1.15015	up
ENSG00000101311	FERMT1	801.075	1.22962	0.148911	8.25741	1.48865e-16	4.89285e-14	1.16994	up
ENSG00000107560	RAB11FIP2	317.172	1.2118	0.186493	6.49785	8.14748e-11	1.28705e-08	1.12205	up
ENSG00000175029	CTBP2	1603.52	1.20882	0.137114	8.81614	1.18471e-18	4.6427e-16	1.1587	up
ENSG00000258704	SRP54-AS1	87.5805	1.20387	0.345506	3.48438	0.000493283	0.0146961	0.944021	up
ENSG00000260077		47.5556	1.20217	0.397803	3.02201	0.00251098	0.0491739	0.881286	up
ENSG00000188690	UROS	190.907	1.19996	0.23684	5.06656	4.05079e-07	3.24988e-05	1.06281	up
ENSG00000143194	MAEL	2182.63	1.17751	0.125091	9.41323	4.8114e-21	2.28016e-18	1.1366	up
ENSG00000241990	PRR34-AS1	182.916	1.17527	0.227363	5.16911	2.35216e-07	2.00554e-05	1.05044	up
ENSG00000133321	PLAAT4	88.6572	1.17265	0.290161	4.04138	5.31377e-05	0.00226062	0.9824	up
ENSG00000205362	MT1A	411.325	1.16842	0.212607	5.49566	3.89253e-08	3.92683e-06	1.05829	up
ENSG00000108010	GLRX3	545.447	1.16608	0.159782	7.29796	2.92155e-13	6.84315e-11	1.1014	up
ENSG00000170370	EMX2	79.9263	1.16034	0.375156	3.09296	0.00198171	0.0420745	0.876718	up
ENSG00000127884	ECHS1	1057.28	1.15944	0.188757	6.1425	8.12307e-10	1.08903e-07	1.07158	up
ENSG00000166710	B2M	3735.44	1.15592	0.136759	8.45222	2.85808e-17	1.00417e-14	1.10823	up
ENSG00000265992	ESRG	558.168	1.14745	0.162776	7.04927	1.7986e-12	3.73999e-10	1.08152	up
ENSG00000228672	PROB1	65.7957	1.14241	0.341388	3.34639	0.00081872	0.0217238	0.900931	up
ENSG00000106853	PTGR1	420.538	1.13672	0.169644	6.70063	2.07517e-11	3.58372e-09	1.06616	up
ENSG00000248890	HHIP-AS1	91.1937	1.13396	0.273687	4.14329	3.42362e-05	0.00157843	0.967311	up
ENSG00000085871	MGST2	288.678	1.12892	0.218121	5.17567	2.27092e-07	1.95261e-05	1.01759	up
ENSG00000099204	ABLIM1	370.251	1.1247	0.18039	6.2348	4.52357e-10	6.18666e-08	1.04638	up
ENSG00000135119	RNFT2	535.641	1.12156	0.155777	7.19981	6.02959e-13	1.33555e-10	1.06226	up
ENSG00000127252	PLAAT1	74.3638	1.12106	0.2984	3.75692	0.00017202	0.00622632	0.930506	up
ENSG00000124092	CTCFL	352.589	1.11944	0.17318	6.46406	1.0193e-10	1.53861e-08	1.04719	up
ENSG00000240065	PSMB9	66.7699	1.11581	0.351602	3.17351	0.0015061	0.0344459	0.868508	up
ENSG00000189319	FAM53B	230.509	1.11483	0.25202	4.42358	9.70809e-06	0.000540862	0.972708	up
ENSG00000175470	PPP2R2D	289.598	1.10937	0.218047	5.08773	3.62376e-07	2.95292e-05	0.999994	up
ENSG00000147883	CDKN2B	54.4551	1.10421	0.359338	3.0729	0.00211992	0.044262	0.851434	up
ENSG00000154473	BUB3	1279.5	1.10386	0.138013	7.99823	1.26226e-15	3.83914e-13	1.05752	up
ENSG00000261324		85.0745	1.10357	0.320129	3.44725	0.000566331	0.0163235	0.892768	up
ENSG00000273599		91.5606	1.1012	0.361098	3.04958	0.00229164	0.0466891	0.846669	up
ENSG00000166780	BMERB1	100.297	1.08509	0.289571	3.74722	0.000178807	0.0064377	0.909797	up
ENSG00000236824	BCYRN1	1745.32	1.07206	0.154617	6.93366	4.10076e-12	7.73753e-10	1.01618	up
ENSG00000089225	TBX5	838.602	1.07016	0.196874	5.43579	5.45539e-08	5.31914e-06	0.982516	up
ENSG00000107669	ATE1	196.583	1.06684	0.215701	4.94594	7.57762e-07	5.67708e-05	0.963722	up
ENSG00000137486	ARRB1	58.6773	1.06325	0.351423	3.02557	0.00248167	0.0488142	0.827811	up
ENSG00000165752	STK32C	482.489	1.0604	0.224896	4.71506	2.41645e-06	0.000161915	0.949806	up
ENSG00000237506	RPSAP15	601.321	1.05916	0.277889	3.81144	0.000138162	0.00510974	0.89923	up
ENSG00000169136	ATF5	2470.07	1.0572	0.179522	5.889	3.88529e-09	4.79845e-07	0.984221	up
ENSG00000120549	KIAA1217	98.8934	1.05385	0.310929	3.38936	0.00070057	0.0194234	0.862003	up
ENSG00000151893	CACUL1	861.778	1.04857	0.147192	7.12385	1.04955e-12	2.27529e-10	0.998798	up
ENSG00000107679	PLEKHA1	186.842	1.04738	0.215783	4.85385	1.21085e-06	8.56757e-05	0.946017	up
ENSG00000196865	NHLRC2	252.514	1.04727	0.214611	4.87985	1.06169e-06	7.59128e-05	0.946995	up
ENSG00000031081	ARHGAP31	276.712	1.04105	0.249119	4.17892	2.92896e-05	0.00140109	0.910905	up
ENSG00000272512		209.169	1.03455	0.304384	3.39883	0.00067674	0.0189172	0.852527	up
ENSG00000151923	TIAL1	875.103	1.03424	0.141893	7.28892	3.1244e-13	7.23513e-11	0.98847	up
ENSG00000196821	ILRUN	1521.59	1.02786	0.164091	6.26397	3.75306e-10	5.23835e-08	0.9679	up
ENSG00000186767	SPIN4	1038.74	1.02757	0.16076	6.39194	1.6379e-10	2.40124e-08	0.969897	up
ENSG00000198546	ZNF511	331.51	1.02717	0.214783	4.78234	1.73263e-06	0.000119687	0.928612	up
ENSG00000084710	EFR3B	194.816	1.01719	0.278588	3.65122	0.000260998	0.00870885	0.862964	up
ENSG00000125148	MT2A	1546.74	1.01655	0.144763	7.02219	2.18409e-12	4.32111e-10	0.969795	up
ENSG00000196091	MYBPC1	475.584	1.00871	0.226993	4.44382	8.83758e-06	0.00050446	0.901832	up
ENSG00000196177	ACADSB	174.99	1.00637	0.23979	4.19689	2.70607e-05	0.00130674	0.888838	up
ENSG00000096872	IFT74	136.912	1.0051	0.252754	3.97657	6.99159e-05	0.0028552	0.876356	up
ENSG00000148737	TCF7L2	396.149	1.00388	0.180406	5.56453	2.62864e-08	2.69178e-06	0.933948	up
ENSG00000176171	BNIP3	613.213	0.996108	0.182585	5.45558	4.88137e-08	4.82876e-06	0.925175	up
ENSG00000140600	SH3GL3	492.703	0.984918	0.198068	4.97262	6.60544e-07	5.0987e-05	0.903366	up
ENSG00000187720	THSD4	507.387	0.972272	0.181471	5.35773	8.42761e-08	7.84191e-06	0.903806	up
ENSG00000101417	PXMP4	146.469	0.97226	0.260827	3.7276	0.000193313	0.00685101	0.840792	up
ENSG00000107672	NSMCE4A	403.048	0.95571	0.167336	5.71133	1.12096e-08	1.29789e-06	0.89788	up
ENSG00000148908	RGS10	395.829	0.95561	0.182232	5.24392	1.57199e-07	1.38676e-05	0.887824	up
ENSG00000203791	EEF1AKMT2	176.177	0.954369	0.225572	4.23089	2.32769e-05	0.0011375	0.854376	up
ENSG00000165868	HSPA12A	134.966	0.953239	0.233215	4.08739	4.36253e-05	0.00192008	0.847278	up
ENSG00000123104	ITPR2	401.903	0.951846	0.161341	5.89958	3.64439e-09	4.52837e-07	0.898071	up
ENSG00000134954	ETS1	111.498	0.950162	0.283988	3.34578	0.000820511	0.021743	0.801625	up
ENSG00000182240	BACE2	144.808	0.949493	0.246873	3.84607	0.000120025	0.00452439	0.832719	up
ENSG00000182511	FES	93.282	0.941911	0.277442	3.39499	0.000686315	0.0191062	0.800198	up
ENSG00000165029	ABCA1	202.586	0.939183	0.204801	4.58583	4.52191e-06	0.000282661	0.85654	up
ENSG00000100060	MFNG	290.814	0.934229	0.209105	4.46776	7.90434e-06	0.000462858	0.848853	up
ENSG00000171813	PWWP2B	84.4096	0.928989	0.300121	3.09538	0.0019656	0.0419424	0.769521	up
ENSG00000197771	MCMBP	246.786	0.926595	0.242768	3.8168	0.000135195	0.00503659	0.816018	up
ENSG00000107938	EDRF1	129.943	0.922185	0.281986	3.27032	0.00107425	0.0267945	0.779611	up
ENSG00000184675	AMER1	103.159	0.919189	0.264612	3.47373	0.000513282	0.0151809	0.791698	up
ENSG00000165672	PRDX3	503.944	0.915809	0.277844	3.29612	0.000980292	0.0249393	0.777672	up
ENSG00000110651	CD81	1452.66	0.914096	0.213908	4.27332	1.92587e-05	0.000954875	0.827012	up
ENSG00000125657	TNFSF9	83.6222	0.912345	0.297056	3.07129	0.00213138	0.0444102	0.758363	up
ENSG00000186197	EDARADD	183.69	0.911466	0.273195	3.33632	0.000848963	0.0223806	0.777774	up
ENSG00000123576	ESX1	652.62	0.911457	0.184109	4.95063	7.39723e-07	5.56239e-05	0.845502	up
ENSG00000166965	RCCD1	797.801	0.911067	0.179694	5.07011	3.97591e-07	3.20242e-05	0.848063	up
ENSG00000250564	LINC02999	118.076	0.901387	0.29688	3.0362	0.00239584	0.0476955	0.749325	up
ENSG00000148773	MKI67	2705.18	0.899989	0.122163	7.36714	1.74331e-13	4.28014e-11	0.870119	up
ENSG00000178947	SMIM10L2A	270.306	0.899024	0.207109	4.34083	1.41946e-05	0.000753273	0.818243	up
ENSG00000165813	CCDC186	286.937	0.893834	0.189621	4.7138	2.43134e-06	0.000161915	0.825548	up
ENSG00000115421	PAPOLG	114.848	0.893728	0.274483	3.25604	0.00112979	0.0278389	0.761813	up
ENSG00000165832	TRUB1	255.761	0.892852	0.235919	3.78457	0.000153974	0.00564332	0.791543	up
ENSG00000079102	RUNX1T1	140.862	0.883172	0.261433	3.37819	0.000729636	0.0199578	0.763306	up
ENSG00000176170	SPHK1	141.88	0.876617	0.24325	3.60377	0.000313633	0.0101448	0.771571	up
ENSG00000147065	MSN	923.699	0.871569	0.166159	5.2454	1.55946e-07	1.38169e-05	0.819534	up
ENSG00000156642	NPTN	1700.17	0.868726	0.153736	5.65077	1.59734e-08	1.77872e-06	0.823922	up
ENSG00000184160	ADRA2C	404.738	0.861945	0.175241	4.91864	8.7148e-07	6.42932e-05	0.805084	up
ENSG00000148824	MTG1	117.755	0.861252	0.25487	3.37918	0.00072702	0.0199129	0.749252	up
ENSG00000186868	MAPT	308.468	0.856215	0.235436	3.63672	0.000276135	0.00916461	0.759304	up
ENSG00000111676	ATN1	137.129	0.847876	0.233584	3.62986	0.000283572	0.00939613	0.753387	up
ENSG00000234745	HLA-B	1077.47	0.847646	0.15597	5.43468	5.48949e-08	5.3269e-06	0.80273	up
ENSG00000187398	LUZP2	140.911	0.844942	0.230022	3.67332	0.000239422	0.0081999	0.7533	up
ENSG00000185070	FLRT2	295.434	0.843193	0.203711	4.13916	3.48581e-05	0.00160347	0.769693	up
ENSG00000147099	HDAC8	264.273	0.835783	0.24402	3.42506	0.000614656	0.0174937	0.735012	up
ENSG00000233639	PANTR1	129.311	0.824944	0.250646	3.29127	0.000997373	0.0252332	0.720753	up
ENSG00000183779	ZNF703	381.97	0.822279	0.245581	3.3483	0.000813075	0.0216303	0.722028	up
ENSG00000178741	COX5A	5243.53	0.820523	0.152606	5.37673	7.58488e-08	7.22265e-06	0.7788	up
ENSG00000178718	RPP25	461.74	0.820475	0.192948	4.25232	2.11571e-05	0.0010414	0.755751	up
ENSG00000135447	PPP1R1A	195.934	0.810243	0.2383	3.4001	0.00067361	0.0188555	0.716547	up
ENSG00000108679	LGALS3BP	294.856	0.810224	0.195165	4.15149	3.3032e-05	0.00154742	0.744975	up
ENSG00000011347	SYT7	143.019	0.808356	0.235538	3.43196	0.000599236	0.0171163	0.716845	up
ENSG00000147872	PLIN2	329.086	0.791585	0.182408	4.33965	1.4271e-05	0.000753404	0.735314	up
ENSG00000139998	RAB15	700.26	0.79038	0.164441	4.80646	1.53625e-06	0.000106845	0.744086	up
ENSG00000165650	PDZD8	279.098	0.787434	0.225851	3.48651	0.000489358	0.0146005	0.704786	up
ENSG00000129493	HEATR5A	171.688	0.786904	0.257153	3.06006	0.00221295	0.0455372	0.68296	up
ENSG00000129158	SERGEF	236.69	0.785713	0.191246	4.10839	3.98434e-05	0.00179234	0.724729	up
ENSG00000177504	VCX2	326.463	0.783488	0.220111	3.55951	0.000371548	0.0116126	0.704886	up
ENSG00000159200	RCAN1	250.615	0.77381	0.202686	3.81778	0.000134656	0.00502727	0.706989	up
ENSG00000125648	SLC25A23	460.866	0.771867	0.234598	3.29017	0.00100126	0.0252835	0.685081	up
ENSG00000177700	POLR2L	964.898	0.771322	0.213787	3.60791	0.000308678	0.0100323	0.697914	up
ENSG00000205642	VCX3B	200	0.770326	0.233513	3.29886	0.000970796	0.0247906	0.684402	up
ENSG00000235026	DPP10-AS1	237.543	0.762084	0.219356	3.47419	0.000512405	0.015177	0.686091	up
ENSG00000189067	LITAF	542.912	0.752881	0.169806	4.43379	9.25927e-06	0.000518367	0.706041	up
ENSG00000278023	RDM1	150.914	0.751321	0.238175	3.15448	0.00160782	0.0362035	0.664549	up
ENSG00000244398		13322.4	0.748775	0.208587	3.58975	0.000330997	0.0106177	0.680643	up
ENSG00000069011	PITX1	737.527	0.746662	0.233993	3.19096	0.00141801	0.0330104	0.663101	up
ENSG00000138771	SHROOM3	178.462	0.744095	0.237815	3.12888	0.00175471	0.038449	0.658471	up
ENSG00000247134		182.36	0.743512	0.229129	3.24494	0.00117474	0.0286709	0.66336	up
ENSG00000214182	PTMAP5	1670.78	0.740357	0.188894	3.91943	8.87596e-05	0.00349854	0.684185	up
ENSG00000249395	CASC9	331.932	0.739801	0.176068	4.2018	2.64804e-05	0.0012848	0.690555	up
ENSG00000141096	DPEP3	506.287	0.737361	0.212613	3.46809	0.000524179	0.0153915	0.667877	up
ENSG00000117877	POLR1G	182.154	0.737191	0.243185	3.0314	0.00243421	0.0481247	0.648875	up
ENSG00000172954	LCLAT1	450.363	0.736692	0.191478	3.84741	0.000119375	0.00451394	0.679415	up
ENSG00000169744	LDB2	252.543	0.728498	0.216354	3.36716	0.000759461	0.0205234	0.657708	up
ENSG00000150510	FAM124A	220.345	0.726575	0.220296	3.29818	0.000973153	0.0248197	0.653626	up
ENSG00000141576	RNF157	225.377	0.72382	0.216144	3.34878	0.000811686	0.0216216	0.653541	up
ENSG00000092847	AGO1	478.479	0.714212	0.164336	4.34605	1.38608e-05	0.000737483	0.672436	up
ENSG00000087510	TFAP2C	775.659	0.713688	0.166541	4.28537	1.82439e-05	0.00091345	0.670871	up
ENSG00000110693	SOX6	309.978	0.707791	0.211234	3.35075	0.000805941	0.0215248	0.641867	up
ENSG00000152082	MZT2B	2119.57	0.699191	0.196071	3.56601	0.000362451	0.011414	0.642372	up
ENSG00000101605	MYOM1	2463.48	0.692344	0.168963	4.0976	4.17448e-05	0.00185332	0.649672	up
ENSG00000099256	PRTFDC1	183.872	0.691521	0.204595	3.37996	0.000724969	0.0199129	0.63079	up
ENSG00000078124	ACER3	494.982	0.689743	0.170845	4.03724	5.40845e-05	0.00229611	0.646333	up
ENSG00000124766	SOX4	1741.66	0.689661	0.147017	4.69103	2.71829e-06	0.000178114	0.656994	up
ENSG00000026508	CD44	196.066	0.688918	0.214721	3.20843	0.0013346	0.0314409	0.622835	up
ENSG00000158164	TMSB15A	386.506	0.687822	0.173049	3.97472	7.04613e-05	0.00286599	0.643513	up
ENSG00000231767	RPS27AP5	3161.58	0.683978	0.172881	3.95636	7.60997e-05	0.0030587	0.639976	up
ENSG00000139351	SYCP3	367.15	0.683108	0.201787	3.38529	0.000711026	0.0196066	0.624569	up
ENSG00000171016	PYGO1	165.837	0.683004	0.220449	3.09824	0.00194674	0.0417146	0.614357	up
ENSG00000213397	HAUS7	936.849	0.681115	0.177102	3.84589	0.000120115	0.00452439	0.635267	up
ENSG00000100360	IFT27	206.464	0.675926	0.209566	3.22537	0.00125812	0.0300563	0.613875	up
ENSG00000120509	PDZD11	253.078	0.671863	0.220911	3.04133	0.00235533	0.0472411	0.604027	up
ENSG00000084207	GSTP1	25765.7	0.671859	0.196891	3.41233	0.000644092	0.0181791	0.616846	up
ENSG00000257923	CUX1	1354.29	0.667585	0.142357	4.6895	2.73867e-06	0.000178874	0.637846	up
ENSG00000144724	PTPRG	290.869	0.666589	0.219914	3.03113	0.00243641	0.0481247	0.599897	up
ENSG00000131171	SH3BGRL	298.228	0.664066	0.192375	3.45193	0.000556596	0.0161342	0.611968	up
ENSG00000181704	YIPF6	563.766	0.660501	0.1505	4.3887	1.14033e-05	0.000624666	0.627792	up
ENSG00000117461	PIK3R3	244.814	0.659859	0.218172	3.02449	0.00249051	0.0488937	0.5947	up
ENSG00000154822	PLCL2	278.081	0.659686	0.18764	3.51571	0.000438584	0.0134196	0.610254	up
ENSG00000102144	PGK1	2734.26	0.655604	0.120902	5.4226	5.87391e-08	5.67291e-06	0.634278	up
ENSG00000133612	AGAP3	1083.38	0.651417	0.207125	3.14505	0.00166057	0.0367417	0.592888	up
ENSG00000108828	VAT1	966.537	0.650823	0.146602	4.43937	9.02217e-06	0.000511329	0.620159	up
ENSG00000005059	MCUB	965.948	0.648187	0.156781	4.13435	3.55967e-05	0.00163009	0.613495	up
ENSG00000162065	TBC1D24	323.941	0.647251	0.184807	3.5023	0.00046126	0.0139459	0.600092	up
ENSG00000109472	CPE	376.802	0.645676	0.175876	3.67119	0.000241421	0.00821784	0.602775	up
ENSG00000105968	H2AZ2	5614.61	0.64282	0.162417	3.95782	7.56356e-05	0.00304605	0.606042	up
ENSG00000147100	SLC16A2	273.966	0.639495	0.198068	3.22866	0.00124373	0.0298523	0.586582	up
ENSG00000275023	MLLT6	456.125	0.637152	0.174196	3.65768	0.000254513	0.00853038	0.595576	up
ENSG00000181026	AEN	1769.25	0.634787	0.175176	3.62372	0.000290395	0.00957551	0.592925	up
ENSG00000198034	RPS4X	27302	0.633424	0.178803	3.54258	0.000396235	0.0122899	0.59003	up
ENSG00000140474	ULK3	591.63	0.633345	0.15199	4.16702	3.0861e-05	0.00145547	0.601384	up
ENSG00000124191	TOX2	1031.11	0.632159	0.146935	4.30231	1.69024e-05	0.000858947	0.602245	up
ENSG00000143995	MEIS1	368.897	0.632013	0.180015	3.5109	0.000446591	0.0136033	0.588148	up
ENSG00000122642	FKBP9	816.645	0.629096	0.144516	4.35312	1.34214e-05	0.000715969	0.600258	up
ENSG00000075340	ADD2	1111.9	0.625734	0.19757	3.16715	0.00153941	0.0350895	0.574167	up
ENSG00000104447	TRPS1	790.113	0.62234	0.144822	4.29728	1.72909e-05	0.000874328	0.593695	up
ENSG00000165496	RPL10L	248.463	0.62115	0.205786	3.01843	0.0025409	0.0494289	0.565984	up
ENSG00000204217	BMPR2	297.187	0.619756	0.184936	3.35118	0.000804668	0.0215191	0.574548	up
ENSG00000181191	PJA1	689.56	0.618902	0.200417	3.08807	0.00201458	0.0424103	0.566534	up
ENSG00000185262	UBALD2	528.614	0.618033	0.1797	3.43925	0.000583322	0.0167422	0.575309	up
ENSG00000176749	CDK5R1	300.132	0.616593	0.187353	3.29108	0.000998036	0.0252332	0.570513	up
ENSG00000204711	CFAP95	460.819	0.613445	0.167597	3.66025	0.000251971	0.00847295	0.576228	up
ENSG00000188677	PARVB	610.245	0.611607	0.165131	3.70377	0.00021242	0.00745043	0.575503	up
ENSG00000112406	HECA	313.435	0.611162	0.195325	3.12895	0.00175433	0.038449	0.561836	up
ENSG00000148516	ZEB1	327.215	0.60925	0.185831	3.27852	0.00104354	0.0261564	0.564425	up
ENSG00000115159	GPD2	420.014	0.606083	0.161253	3.75859	0.000170877	0.00619595	0.571874	up
ENSG00000122574	WIPF3	342.774	0.603881	0.188703	3.20016	0.00137353	0.0321351	0.558147	up
ENSG00000128713	HOXD11	1109.9	0.59674	0.147976	4.03269	5.51426e-05	0.00232663	0.56812	up
ENSG00000139168	ZCRB1	2087.52	0.594716	0.157511	3.77571	0.00015955	0.00581628	0.562603	up
ENSG00000020633	RUNX3	433.015	0.594519	0.188402	3.15559	0.00160176	0.0361871	0.54962	up
ENSG00000184515	BEX5	774.519	0.59013	0.190802	3.0929	0.00198211	0.0420745	0.544519	up
ENSG00000113300	CNOT6	1075.03	0.589553	0.136217	4.32804	1.50442e-05	0.000778096	0.565417	up
ENSG00000186297	GABRA5	533.479	0.589346	0.168446	3.49872	0.000467489	0.0140302	0.553244	up
ENSG00000070010	UFD1	728.888	0.589073	0.167925	3.50796	0.00045156	0.0137137	0.553181	up
ENSG00000100417	PMM1	395.645	0.587365	0.193017	3.04308	0.00234171	0.047107	0.54099	up
ENSG00000197102	DYNC1H1	9182.89	0.587137	0.18472	3.17853	0.00148022	0.0340452	0.544404	up
ENSG00000140367	UBE2Q2	477.176	0.585638	0.159529	3.67105	0.000241559	0.00821784	0.553255	up
ENSG00000184575	XPOT	727.21	0.583323	0.146566	3.97994	6.89337e-05	0.00282075	0.555859	up
ENSG00000198883	PNMA5	8334.6	0.579641	0.190695	3.03963	0.00236868	0.047462	0.534894	up
ENSG00000135090	TAOK3	1065.55	0.574554	0.1464	3.92454	8.68968e-05	0.00343175	0.547553	up
ENSG00000169689	CENPX	538.365	0.566764	0.183239	3.09304	0.00198119	0.0420745	0.526127	up
ENSG00000176834	VSIG10	539.618	0.565402	0.157536	3.58904	0.0003319	0.0106177	0.534862	up
ENSG00000164024	METAP1	1294.58	0.564334	0.143169	3.94174	8.08935e-05	0.00321962	0.53892	up
ENSG00000198142	SOWAHC	499.637	0.557433	0.183932	3.03065	0.00244029	0.0481396	0.517176	up
ENSG00000185721	DRG1	830.16	0.554029	0.181879	3.04614	0.00231798	0.0469343	0.51484	up
ENSG00000107581	EIF3A	5054.76	0.553211	0.1327	4.16888	3.06097e-05	0.00144779	0.531676	up
ENSG00000110090	CPT1A	2267.63	0.551883	0.147585	3.73942	0.000184448	0.00660577	0.525547	up
ENSG00000158301	GPRASP2	333.806	0.551582	0.178444	3.09106	0.0019944	0.0422034	0.513925	up
ENSG00000005020	SKAP2	307.166	0.54279	0.178275	3.04467	0.00232935	0.0470441	0.505809	up
ENSG00000206503	HLA-A	2929.3	0.540748	0.136741	3.95455	7.66773e-05	0.00307585	0.518452	up
ENSG00000114982	KANSL3	879.057	0.540105	0.165978	3.25407	0.00113765	0.0279596	0.50791	up
ENSG00000232119	MCTS1	780.596	0.53957	0.173974	3.10145	0.00192577	0.0414396	0.504438	up
ENSG00000205871	RPS3AP47	2507.29	0.539064	0.148867	3.6211	0.000293355	0.00962639	0.512914	up
ENSG00000137200	CMTR1	472.934	0.537714	0.170838	3.1475	0.00164672	0.0365757	0.503885	up
ENSG00000101109	STK4	939.333	0.532728	0.148911	3.57749	0.000346908	0.0110458	0.506868	up
ENSG00000166326	TRIM44	684.916	0.531858	0.160116	3.32171	0.000894678	0.0232251	0.502243	up
ENSG00000120837	NFYB	657.632	0.528747	0.146628	3.60604	0.0003109	0.0100884	0.50383	up
ENSG00000053254	FOXN3	2398.4	0.524985	0.153762	3.41428	0.000639512	0.0180749	0.49791	up
ENSG00000000003	TSPAN6	514.005	0.523988	0.166486	3.14733	0.00164768	0.0365757	0.492578	up
ENSG00000147324	MFHAS1	1457.38	0.51622	0.167413	3.08352	0.00204569	0.0429764	0.48495	up
ENSG00000168209	DDIT4	942.799	0.509774	0.161582	3.1549	0.00160556	0.0362035	0.480894	up
ENSG00000029993	HMGB3	2465.46	0.505594	0.160103	3.15793	0.00158895	0.0359773	0.47744	up
ENSG00000105202	FBL	10708.2	0.500831	0.164202	3.0501	0.00228769	0.0466652	0.471582	up
ENSG00000076554	TPD52	557.343	0.500032	0.156713	3.19075	0.00141904	0.0330104	0.473301	up
ENSG00000117868	ESYT2	469.035	0.499446	0.162775	3.06833	0.00215262	0.0446702	0.470766	up
ENSG00000085365	SCAMP1	905.89	0.496204	0.141301	3.51167	0.000445293	0.0135855	0.474415	up
ENSG00000147130	ZMYM3	417.236	0.495965	0.160541	3.08933	0.00200607	0.0423624	0.468208	up
ENSG00000152127	MGAT5	500.437	0.489666	0.160875	3.04377	0.00233632	0.0470641	0.462148	up
ENSG00000188158	NHS	652.102	0.485369	0.153991	3.15193	0.00162194	0.0362221	0.460268	up
ENSG00000213853	EMP2	457.671	0.480722	0.157814	3.04612	0.00231812	0.0469343	0.454678	up
ENSG00000112992	NNT	848.2	0.459082	0.151201	3.03623	0.00239554	0.0476955	0.436144	up
ENSG00000182718	ANXA2	2438.54	0.45895	0.130173	3.52569	0.000422374	0.0129626	0.441732	up
ENSG00000154723	ATP5PF	2058.83	0.448839	0.124076	3.61746	0.000297507	0.00973131	0.433489	up
ENSG00000137504	CREBZF	883.297	0.445591	0.14763	3.01829	0.00254206	0.0494289	0.424315	up
ENSG00000113657	DPYSL3	949.628	0.445554	0.138928	3.20709	0.00134085	0.0315145	0.426617	up
ENSG00000089220	PEBP1	7674.73	0.433371	0.137501	3.15177	0.00162287	0.0362221	0.415309	up
ENSG00000165349	SLC7A3	3149.88	0.430904	0.130452	3.30316	0.000956021	0.0245054	0.414671	up
ENSG00000135404	CD63	6085.1	0.418388	0.121392	3.44658	0.000567734	0.0163408	0.404671	up
ENSG00000121570	DPPA4	1621.69	0.408468	0.129765	3.14775	0.00164533	0.0365757	0.393237	up
ENSG00000114999	TTL	1177.49	0.404322	0.13274	3.04597	0.0023193	0.0469343	0.388572	up
ENSG00000090863	GLG1	1656.45	-0.392119	0.1263	-3.10466	0.00190495	0.0410349	-0.378241	down
ENSG00000120053	GOT1	2212.5	-0.407121	0.128904	-3.15833	0.00158677	0.035968	-0.392134	down
ENSG00000198804	MT-CO1	15753.7	-0.415129	0.128124	-3.24006	0.00119506	0.0290956	-0.400024	down
ENSG00000117724	CENPF	7039.19	-0.417842	0.136109	-3.0699	0.00214128	0.0444802	-0.400765	down
ENSG00000141480	ARRB2	1546.7	-0.419946	0.135593	-3.0971	0.00195421	0.0418308	-0.402906	down
ENSG00000166136	NDUFB8	2690.75	-0.429299	0.129684	-3.31034	0.000931832	0.0240061	-0.413311	down
ENSG00000127603	MACF1	1717.95	-0.440661	0.132193	-3.33347	0.000857687	0.0225522	-0.423635	down
ENSG00000117139	KDM5B	790.545	-0.447472	0.147076	-3.04245	0.00234659	0.047112	-0.426262	down
ENSG00000119969	HELLS	2275.33	-0.45512	0.134399	-3.38634	0.000708327	0.0195586	-0.436967	down
ENSG00000131016	AKAP12	1816.54	-0.463738	0.128948	-3.59632	0.000322749	0.0103902	-0.446656	down
ENSG00000172270	BSG	704.232	-0.478332	0.154492	-3.09615	0.00196049	0.0419211	-0.453444	down
ENSG00000149948	HMGA2	1542.78	-0.478373	0.129531	-3.69312	0.000221519	0.00771645	-0.460598	down
ENSG00000047410	TPR	1727.76	-0.483796	0.148213	-3.26419	0.00109778	0.0271488	-0.46053	down
ENSG00000117523	PRRC2C	4302.68	-0.484782	0.131548	-3.6852	0.000228526	0.00789503	-0.466225	down
ENSG00000198695	MT-ND6	5417.51	-0.490098	0.127245	-3.85163	0.000117335	0.00445262	-0.472501	down
ENSG00000173230	GOLGB1	964.139	-0.49303	0.136924	-3.60076	0.000317286	0.0102467	-0.472646	down
ENSG00000120694	HSPH1	1033.48	-0.500052	0.153646	-3.25457	0.00113563	0.027949	-0.474292	down
ENSG00000139219	COL2A1	1832.67	-0.503811	0.154116	-3.26903	0.00107918	0.0268845	-0.477704	down
ENSG00000163584	RPL22L1	952.268	-0.510104	0.147002	-3.47004	0.000520389	0.0153242	-0.485951	down
ENSG00000115738	ID2	420.006	-0.511146	0.167284	-3.05555	0.00224646	0.0460547	-0.480229	down
ENSG00000138160	KIF11	338.869	-0.515558	0.169388	-3.04365	0.00233727	0.0470641	-0.48364	down
ENSG00000116133	DHCR24	1985.65	-0.520236	0.139555	-3.72784	0.000193131	0.00685101	-0.497931	down
ENSG00000090971	NAT14	579.051	-0.5223	0.154685	-3.37653	0.000734071	0.0200522	-0.495046	down
ENSG00000173905	GOLIM4	856.763	-0.523361	0.155192	-3.37235	0.0007453	0.0202773	-0.495894	down
ENSG00000242125	SNHG3	3082.95	-0.524195	0.157364	-3.33111	0.000865015	0.0226572	-0.495949	down
ENSG00000178999	AURKB	3378.2	-0.525534	0.167871	-3.13058	0.0017446	0.0383097	-0.493537	down
ENSG00000187240	DYNC2H1	731.195	-0.528011	0.143494	-3.67968	0.000233524	0.00805204	-0.504131	down
ENSG00000234741	GAS5	2980.38	-0.528188	0.145979	-3.61823	0.00029662	0.00971787	-0.50351	down
ENSG00000056998	GYG2	545.563	-0.531493	0.164369	-3.23353	0.00122269	0.0295213	-0.50041	down
ENSG00000186472	PCLO	378.363	-0.537927	0.174444	-3.08367	0.00204467	0.0429764	-0.502741	down
ENSG00000090621	PABPC4	1481.24	-0.541329	0.155558	-3.47991	0.000501582	0.0148998	-0.512794	down
ENSG00000153207	AHCTF1	577.686	-0.554229	0.180782	-3.06574	0.00217132	0.0448996	-0.5155	down
ENSG00000148143	ZNF462	365.861	-0.556758	0.173557	-3.20792	0.00133697	0.0314605	-0.520703	down
ENSG00000167191	GPRC5B	404.635	-0.556972	0.165994	-3.35537	0.000792601	0.0212801	-0.523765	down
ENSG00000159164	SV2A	950.677	-0.563496	0.169596	-3.32258	0.000891882	0.0231821	-0.528514	down
ENSG00000173145	NOC3L	423.228	-0.566406	0.186375	-3.03906	0.00237315	0.0474745	-0.524532	down
ENSG00000229089	ANKRD20A8P	508.153	-0.566927	0.18024	-3.14541	0.00165856	0.0367417	-0.527508	down
ENSG00000008311	AASS	1518.98	-0.56786	0.135869	-4.17947	2.92194e-05	0.00140102	-0.544732	down
ENSG00000185825	BCAP31	932.59	-0.568777	0.179996	-3.15994	0.00157804	0.0358499	-0.529315	down
ENSG00000141456	PELP1	940.988	-0.570764	0.1681	-3.39538	0.000685322	0.0191046	-0.535919	down
ENSG00000116005	PCYOX1	685.328	-0.572752	0.160402	-3.57073	0.000355985	0.0112819	-0.540766	down
ENSG00000138448	ITGAV	420.746	-0.575884	0.166861	-3.45128	0.000557934	0.01615	-0.541208	down
ENSG00000105612	DNASE2	972.919	-0.58289	0.138279	-4.21531	2.49431e-05	0.00121311	-0.558331	down
ENSG00000133028	SCO1	389.85	-0.58712	0.182023	-3.22553	0.00125738	0.0300563	-0.545558	down
ENSG00000107815	TWNK	328.793	-0.598787	0.195308	-3.06586	0.00217047	0.0448996	-0.550481	down
ENSG00000138175	ARL3	575.432	-0.600216	0.14991	-4.00385	6.23211e-05	0.00257081	-0.570717	down
ENSG00000198363	ASPH	865.971	-0.601931	0.173419	-3.47097	0.000518586	0.0152934	-0.562995	down
ENSG00000173402	DAG1	350.422	-0.602929	0.187292	-3.21919	0.00128554	0.0304614	-0.557943	down
ENSG00000170242	USP47	227.492	-0.603159	0.199489	-3.02352	0.00249849	0.0490031	-0.552583	down
ENSG00000007062	PROM1	773.964	-0.605717	0.179069	-3.38258	0.000718074	0.0197742	-0.56413	down
ENSG00000026652	AGPAT4	290.687	-0.608872	0.188376	-3.23222	0.00122833	0.0295873	-0.562912	down
ENSG00000143621	ILF2	1296.1	-0.613265	0.179133	-3.42352	0.000618149	0.0175685	-0.571126	down
ENSG00000171988	JMJD1C	226.966	-0.613758	0.194557	-3.15465	0.0016069	0.0362035	-0.564624	down
ENSG00000229637	PRAC2	273.909	-0.614892	0.195497	-3.14527	0.00165931	0.0367417	-0.565197	down
ENSG00000014919	COX15	441.883	-0.623255	0.170703	-3.6511	0.00026112	0.00870885	-0.584103	down
ENSG00000198763	MT-ND2	18189.5	-0.624499	0.193983	-3.21935	0.00128483	0.0304614	-0.574748	down
ENSG00000119977	TCTN3	252.601	-0.624905	0.196701	-3.17692	0.00148846	0.0341961	-0.573876	down
ENSG00000077147	TM9SF3	2530.24	-0.627282	0.128082	-4.89752	9.70539e-07	7.06344e-05	-0.604475	down
ENSG00000124222	STX16	681.675	-0.632613	0.1897	-3.33481	0.000853575	0.0224731	-0.584276	down
ENSG00000141027	NCOR1	1384	-0.634712	0.136682	-4.64371	3.42208e-06	0.000219985	-0.608562	down
ENSG00000107521	HPS1	376.257	-0.63533	0.208041	-3.05387	0.00225913	0.0462679	-0.577747	down
ENSG00000182263	FIGN	267.712	-0.635829	0.205496	-3.09411	0.00197403	0.0420343	-0.579572	down
ENSG00000091136	LAMB1	1193.6	-0.641355	0.177097	-3.62149	0.000292906	0.00962639	-0.598207	down
ENSG00000179218	CALR	252.607	-0.64167	0.189864	-3.37963	0.000725832	0.0199129	-0.592518	down
ENSG00000155256	ZFYVE27	241.134	-0.646369	0.190476	-3.39344	0.000690204	0.0191621	-0.596581	down
ENSG00000161970	RPL26	26822	-0.653213	0.130558	-5.00324	5.63749e-07	4.38476e-05	-0.628567	down
ENSG00000247400	DNAJC3-DT	174.968	-0.660425	0.217053	-3.04268	0.00234478	0.047112	-0.595825	down
ENSG00000124422	USP22	544.128	-0.662464	0.172331	-3.84413	0.000120979	0.00454854	-0.620098	down
ENSG00000169241	SLC50A1	273.194	-0.665431	0.203249	-3.27397	0.00106047	0.0265156	-0.607634	down
ENSG00000212907	MT-ND4L	7005.74	-0.670632	0.157517	-4.25754	2.06692e-05	0.00101985	-0.634424	down
ENSG00000091640	SPAG7	1724.92	-0.676951	0.128647	-5.26209	1.42426e-07	1.26741e-05	-0.652123	down
ENSG00000137285	TUBB2B	8499.99	-0.684688	0.132846	-5.15398	2.5501e-07	2.13851e-05	-0.657977	down
ENSG00000074356	NCBP3	454.416	-0.685471	0.169239	-4.05031	5.11494e-05	0.00219899	-0.643091	down
ENSG00000137267	TUBB2A	944.796	-0.685808	0.166632	-4.1157	3.86007e-05	0.00174413	-0.644637	down
ENSG00000177302	TOP3A	216.284	-0.687587	0.211955	-3.24402	0.00117854	0.0287276	-0.623162	down
ENSG00000065613	SLK	1763.64	-0.692551	0.156605	-4.42227	9.76703e-06	0.000542323	-0.655571	down
ENSG00000197147	LRRC8B	427.872	-0.693424	0.167157	-4.14834	3.34889e-05	0.00156164	-0.651567	down
ENSG00000279088		325.344	-0.69843	0.18944	-3.68681	0.000227086	0.00788341	-0.645174	down
ENSG00000101115	SALL4	291.76	-0.699508	0.17922	-3.90307	9.4979e-05	0.00370073	-0.651377	down
ENSG00000072778	ACADVL	477.318	-0.700351	0.169014	-4.14374	3.41682e-05	0.00157843	-0.657186	down
ENSG00000122257	RBBP6	2536.98	-0.702497	0.125111	-5.615	1.96561e-08	2.12439e-06	-0.678085	down
ENSG00000132383	RPA1	746.298	-0.703187	0.144631	-4.86194	1.16242e-06	8.25355e-05	-0.670911	down
ENSG00000214413	BBIP1	187.107	-0.703274	0.219061	-3.2104	0.0013255	0.0313352	-0.633418	down
ENSG00000129195	PIMREG	311.275	-0.709498	0.19965	-3.55371	0.00037984	0.0118174	-0.649963	down
ENSG00000174231	PRPF8	2237.11	-0.71231	0.151262	-4.7091	2.48814e-06	0.000164621	-0.6767	down
ENSG00000005100	DHX33	586.884	-0.712343	0.177356	-4.01645	5.90804e-05	0.00246709	-0.664297	down
ENSG00000099194	SCD	3513.6	-0.716085	0.155084	-4.61739	3.8859e-06	0.000247401	-0.678548	down
ENSG00000108641	B9D1	188.679	-0.719368	0.219963	-3.2704	0.00107397	0.0267945	-0.64731	down
ENSG00000203930	LINC00632	254.186	-0.723682	0.210879	-3.43174	0.000599717	0.0171163	-0.65648	down
ENSG00000137642	SORL1	780.147	-0.724143	0.180675	-4.00799	6.12369e-05	0.00253121	-0.673591	down
ENSG00000151806	GUF1	304.834	-0.730687	0.193184	-3.78234	0.000155364	0.00568403	-0.672978	down
ENSG00000029725	RABEP1	452.398	-0.730858	0.179179	-4.07891	4.52467e-05	0.00197151	-0.680577	down
ENSG00000138613	APH1B	244.446	-0.731606	0.240815	-3.03804	0.00238123	0.0475732	-0.645556	down
ENSG00000095564	BTAF1	527.214	-0.734048	0.161921	-4.53337	5.80498e-06	0.000356307	-0.692315	down
ENSG00000187837	H1-2	1114.99	-0.7367	0.230773	-3.19232	0.00141135	0.0329069	-0.656313	down
ENSG00000258484	SPESP1	206.461	-0.738485	0.234163	-3.15372	0.00161201	0.0362144	-0.655862	down
ENSG00000106537	TSPAN13	191.072	-0.740565	0.219711	-3.37063	0.000749978	0.0203232	-0.666565	down
ENSG00000108064	TFAM	1254.33	-0.740593	0.198895	-3.72355	0.000196443	0.00694986	-0.67884	down
ENSG00000134207	SYT6	316.839	-0.74096	0.177836	-4.16654	3.09264e-05	0.00145547	-0.690703	down
ENSG00000059573	ALDH18A1	984.129	-0.744305	0.202515	-3.6753	0.000237572	0.00815022	-0.680161	down
ENSG00000187867	PALM3	420.884	-0.745499	0.182455	-4.08594	4.3898e-05	0.00192377	-0.692457	down
ENSG00000118971	CCND2	1349.14	-0.747855	0.185488	-4.03183	5.53447e-05	0.00233019	-0.693024	down
ENSG00000154553	PDLIM3	224.175	-0.754409	0.192875	-3.9114	9.17642e-05	0.00358232	-0.694951	down
ENSG00000259848		122.452	-0.758749	0.248555	-3.05264	0.00226837	0.0464104	-0.664472	down
ENSG00000167193	CRK	211.666	-0.759228	0.204637	-3.71012	0.00020716	0.00729103	-0.692586	down
ENSG00000108953	YWHAE	6672.8	-0.760121	0.170612	-4.45527	8.3789e-06	0.000484927	-0.712421	down
ENSG00000139116	KIF21A	533.514	-0.760822	0.193387	-3.93419	8.34766e-05	0.00331596	-0.700601	down
ENSG00000166206	GABRB3	298.775	-0.761652	0.181881	-4.18763	2.81878e-05	0.00135795	-0.707807	down
ENSG00000150625	GPM6A	234.809	-0.762835	0.197663	-3.85927	0.000113727	0.0043481	-0.699925	down
ENSG00000250742	LINC02381	143.25	-0.76587	0.242188	-3.16229	0.00156532	0.0356403	-0.674812	down
ENSG00000108175	ZMIZ1	289.837	-0.767569	0.188187	-4.07876	4.52775e-05	0.00197151	-0.709738	down
ENSG00000138182	KIF20B	2292.58	-0.767762	0.14319	-5.36186	8.23696e-08	7.71529e-06	-0.733187	down
ENSG00000127804	METTL16	289.346	-0.768906	0.21957	-3.50188	0.000461996	0.0139475	-0.692143	down
ENSG00000133030	MPRIP	343.937	-0.769465	0.198282	-3.88066	0.000104175	0.00402824	-0.705716	down
ENSG00000166189	HPS6	144.487	-0.770049	0.251214	-3.06531	0.00217441	0.0448996	-0.67254	down
ENSG00000198712	MT-CO2	75820.9	-0.770156	0.23778	-3.23894	0.00119975	0.0291495	-0.681498	down
ENSG00000169554	ZEB2	137.352	-0.77019	0.237352	-3.24493	0.00117481	0.0286709	-0.681879	down
ENSG00000198888	MT-ND1	26782.7	-0.77055	0.204926	-3.76013	0.000169824	0.00616878	-0.702664	down
ENSG00000229344	MTCO2P12	212.653	-0.77064	0.225127	-3.42314	0.000619025	0.0175689	-0.690235	down
ENSG00000111783	RFX4	127.778	-0.770901	0.248631	-3.10059	0.00193138	0.0415165	-0.675039	down
ENSG00000181222	POLR2A	1103.01	-0.771309	0.13573	-5.68266	1.32616e-08	1.50974e-06	-0.739949	down
ENSG00000006695	COX10	179.771	-0.771653	0.238249	-3.23885	0.00120014	0.0291495	-0.682574	down
ENSG00000129245	FXR2	716.084	-0.771761	0.15538	-4.96692	6.80241e-07	5.19687e-05	-0.731166	down
ENSG00000107779	BMPR1A	190.343	-0.771763	0.222799	-3.46394	0.000532318	0.0155409	-0.69276	down
ENSG00000210154	MT-TD	481.219	-0.774974	0.250419	-3.09471	0.00197009	0.0419942	-0.677172	down
ENSG00000091542	ALKBH5	465.152	-0.777215	0.177599	-4.37622	1.20754e-05	0.000654447	-0.724677	down
ENSG00000148835	TAF5	190.326	-0.779001	0.250144	-3.11421	0.00184439	0.0400693	-0.681072	down
ENSG00000156675	RAB11FIP1	165.988	-0.781834	0.233399	-3.34978	0.000808766	0.021572	-0.694863	down
ENSG00000226221	RPL26P19	164.362	-0.784979	0.233636	-3.35984	0.000779878	0.0209939	-0.697536	down
ENSG00000178307	TMEM11	407.533	-0.786962	0.198063	-3.97328	7.08888e-05	0.00287763	-0.721782	down
ENSG00000279483		427.05	-0.787118	0.195171	-4.03295	5.50799e-05	0.00232663	-0.723704	down
ENSG00000072210	ALDH3A2	249.19	-0.787966	0.201231	-3.91573	9.01295e-05	0.00354469	-0.720863	down
ENSG00000149150	SLC43A1	698.288	-0.789437	0.177954	-4.43618	9.15695e-06	0.000516898	-0.735817	down
ENSG00000092421	SEMA6A	3768.13	-0.79108	0.187543	-4.21811	2.46354e-05	0.00120101	-0.731871	down
ENSG00000269821	KCNQ1OT1	1059.09	-0.79397	0.15602	-5.08889	3.6017e-07	2.94761e-05	-0.751851	down
ENSG00000143320	CRABP2	939.494	-0.794352	0.223905	-3.54772	0.000388581	0.0120709	-0.712233	down
ENSG00000167695	TLCD3A	194.249	-0.801514	0.210292	-3.81144	0.000138162	0.00510974	-0.727587	down
ENSG00000154874	CCDC144B	176.5	-0.803345	0.229132	-3.50604	0.000454824	0.0137923	-0.716705	down
ENSG00000141504	SAT2	243.484	-0.803705	0.208497	-3.85476	0.000115843	0.0044042	-0.730582	down
ENSG00000181649	PHLDA2	216.108	-0.803756	0.247032	-3.25365	0.00113932	0.0279596	-0.704698	down
ENSG00000263711	LINC02864	263.988	-0.805023	0.225663	-3.56737	0.000360586	0.0113746	-0.720533	down
ENSG00000166167	BTRC	181.034	-0.809853	0.244531	-3.31186	0.000926781	0.0239063	-0.711981	down
ENSG00000167693	NXN	1273.18	-0.813628	0.18567	-4.38212	1.17529e-05	0.00064209	-0.753824	down
ENSG00000209082	MT-TL1	5307.14	-0.818595	0.233885	-3.49999	0.000465274	0.0139843	-0.727071	down
ENSG00000249087	ZNF436-AS1	143.003	-0.818693	0.255302	-3.20677	0.00134236	0.0315145	-0.712049	down
ENSG00000066279	ASPM	2152.01	-0.82065	0.164879	-4.97728	6.44846e-07	4.99645e-05	-0.772359	down
ENSG00000132507	EIF5A	571.058	-0.822611	0.177813	-4.62626	3.72325e-06	0.000237844	-0.766847	down
ENSG00000167699	GLOD4	235.221	-0.822791	0.200693	-4.09975	4.13593e-05	0.00184425	-0.75309	down
ENSG00000174989	FBXW8	131.624	-0.822943	0.24698	-3.33202	0.000862165	0.0226116	-0.721802	down
ENSG00000149136	SSRP1	10914.2	-0.823214	0.127046	-6.47968	9.19202e-11	1.40838e-08	-0.793743	down
ENSG00000262050		92.5941	-0.824514	0.272921	-3.02107	0.00251882	0.0492597	-0.703932	down
ENSG00000210082	MT-RNR2	196183	-0.8278	0.142374	-5.81428	6.08956e-09	7.34278e-07	-0.790921	down
ENSG00000108055	SMC3	3315.89	-0.8292	0.164156	-5.05128	4.38851e-07	3.49332e-05	-0.780804	down
ENSG00000174498	IGDCC3	614.371	-0.829344	0.18487	-4.4861	7.25402e-06	0.000432229	-0.768876	down
ENSG00000166704	ZNF606	96.2237	-0.829752	0.265995	-3.11943	0.00181202	0.0394924	-0.713727	down
ENSG00000119927	GPAM	289.864	-0.831353	0.188738	-4.40479	1.05885e-05	0.000581598	-0.768368	down
ENSG00000148843	PDCD11	980.415	-0.83264	0.143582	-5.79905	6.66921e-09	7.99442e-07	-0.794949	down
ENSG00000186532	SMYD4	121.005	-0.834829	0.26515	-3.14851	0.00164103	0.0365475	-0.718759	down
ENSG00000220205	VAMP2	173.184	-0.836955	0.233189	-3.58916	0.000331739	0.0106177	-0.743891	down
ENSG00000007168	PAFAH1B1	873.436	-0.837492	0.163314	-5.12812	2.92655e-07	2.42427e-05	-0.789107	down
ENSG00000211459	MT-RNR1	29574.8	-0.837964	0.125784	-6.66194	2.70236e-11	4.58905e-09	-0.808537	down
ENSG00000011295	TTC19	907.25	-0.838672	0.201178	-4.1688	3.0621e-05	0.00144779	-0.767202	down
ENSG00000132510	KDM6B	108.474	-0.840516	0.26188	-3.20954	0.00132947	0.0313622	-0.726009	down
ENSG00000170558	CDH2	953.006	-0.842736	0.194534	-4.33207	1.47716e-05	0.000767895	-0.775272	down
ENSG00000233098	CCDC144NL-AS1	453.708	-0.843261	0.164265	-5.13354	2.84344e-07	2.36504e-05	-0.793985	down
ENSG00000161011	SQSTM1	145.123	-0.844868	0.24081	-3.50843	0.000450753	0.0137096	-0.745571	down
ENSG00000188042	ARL4C	612.76	-0.850006	0.184112	-4.61679	3.89712e-06	0.000247401	-0.788564	down
ENSG00000281398	SNHG4	395.121	-0.851567	0.20656	-4.12261	3.74596e-05	0.00170772	-0.775522	down
ENSG00000114019	AMOTL2	139.651	-0.854641	0.259248	-3.29661	0.000978586	0.024927	-0.740322	down
ENSG00000210049	MT-TF	7529.21	-0.855171	0.233664	-3.65983	0.000252384	0.00847295	-0.75972	down
ENSG00000187122	SLIT1	238.192	-0.860719	0.208986	-4.11854	3.81279e-05	0.00173356	-0.782062	down
ENSG00000143333	RGS16	162.174	-0.861288	0.235754	-3.65333	0.00025886	0.00866184	-0.763767	down
ENSG00000185924	RTN4RL1	171.926	-0.861536	0.276738	-3.11319	0.0018508	0.0401656	-0.732235	down
ENSG00000187607	ZNF286A	135.159	-0.864142	0.231214	-3.73741	0.000185924	0.00663531	-0.769579	down
ENSG00000135916	ITM2C	337.218	-0.871016	0.276339	-3.15199	0.00162163	0.0362221	-0.740952	down
ENSG00000145423	SFRP2	312.923	-0.873118	0.212935	-4.1004	4.12444e-05	0.00184339	-0.790743	down
ENSG00000133026	MYH10	1407.02	-0.875556	0.132336	-6.61613	3.68712e-11	6.06449e-09	-0.841646	down
ENSG00000176593		106.695	-0.875713	0.262735	-3.33306	0.00085897	0.0225568	-0.755604	down
ENSG00000072310	SREBF1	184.301	-0.876892	0.289202	-3.03211	0.00242852	0.0481247	-0.735516	down
ENSG00000105696	TMEM59L	290.392	-0.883116	0.246599	-3.58118	0.000342045	0.0109251	-0.774817	down
ENSG00000107566	ERLIN1	409.293	-0.884522	0.233629	-3.78601	0.000153083	0.00562077	-0.785914	down
ENSG00000213462	ERV3-1	106.063	-0.885092	0.293269	-3.01803	0.00254426	0.0494289	-0.73911	down
ENSG00000167840	ZNF232	83.2762	-0.885694	0.287867	-3.07674	0.00209276	0.0438747	-0.743995	down
ENSG00000178921	PFAS	565.363	-0.886166	0.159033	-5.57221	2.51524e-08	2.61508e-06	-0.837469	down
ENSG00000050628	PTGER3	299.64	-0.886512	0.176433	-5.02465	5.04354e-07	3.95297e-05	-0.827303	down
ENSG00000141034	GID4	85.0746	-0.88888	0.291331	-3.0511	0.00228002	0.0465713	-0.74366	down
ENSG00000172086	KRCC1	99.1744	-0.891639	0.29544	-3.018	0.00254446	0.0494289	-0.74264	down
ENSG00000166197	NOLC1	1631.69	-0.892683	0.172665	-5.17002	2.34068e-07	2.00413e-05	-0.835404	down
ENSG00000170049	KCNAB3	182.738	-0.894831	0.217563	-4.11297	3.90597e-05	0.00176097	-0.807032	down
ENSG00000171953	ATPAF2	114.354	-0.895684	0.253173	-3.53784	0.000403417	0.0124747	-0.78066	down
ENSG00000141030	COPS3	755.961	-0.896342	0.200773	-4.46445	8.02743e-06	0.000468719	-0.820303	down
ENSG00000289285		141.961	-0.896408	0.274414	-3.26663	0.00108836	0.0269813	-0.764211	down
ENSG00000144589	STK11IP	150.173	-0.896472	0.235512	-3.80648	0.000140961	0.00519441	-0.795115	down
ENSG00000228253	MT-ATP8	8370.84	-0.898383	0.193769	-4.63635	3.54612e-06	0.000227242	-0.826954	down
ENSG00000107833	NPM3	4882.73	-0.901545	0.199008	-4.53021	5.89264e-06	0.000360602	-0.826268	down
ENSG00000138111	MFSD13A	324.673	-0.903175	0.204544	-4.41556	1.00748e-05	0.00055789	-0.823807	down
ENSG00000165338	HECTD2	81.7922	-0.904726	0.299927	-3.01649	0.00255724	0.0496027	-0.749911	down
ENSG00000171517	LPAR3	302.761	-0.913219	0.193442	-4.7209	2.34806e-06	0.00015843	-0.840794	down
ENSG00000117394	SLC2A1	244.951	-0.922871	0.200432	-4.60442	4.13626e-06	0.00025935	-0.844894	down
ENSG00000185722	ANKFY1	201.15	-0.930256	0.207342	-4.48658	7.23742e-06	0.000432229	-0.846578	down
ENSG00000062038	CDH3	73.5634	-0.930504	0.2993	-3.10893	0.00187763	0.0405322	-0.771695	down
ENSG00000104450	SPAG1	104.607	-0.930641	0.300181	-3.10027	0.00193344	0.0415171	-0.771156	down
ENSG00000198964	SGMS1	89.5154	-0.930935	0.273762	-3.40053	0.000672549	0.0188517	-0.794133	down
ENSG00000146013	GFRA3	111.378	-0.931945	0.253456	-3.67695	0.000236042	0.0081251	-0.811972	down
ENSG00000203727	SAMD5	109.99	-0.939902	0.296641	-3.16849	0.00153235	0.0349677	-0.781345	down
ENSG00000047644	WWC3	153.321	-0.94024	0.279922	-3.35893	0.000782451	0.0210353	-0.796824	down
ENSG00000065559	MAP2K4	142.523	-0.94151	0.228626	-4.11813	3.81965e-05	0.00173356	-0.840518	down
ENSG00000182809	CRIP2	154.567	-0.942351	0.279259	-3.37447	0.000739568	0.0201483	-0.798753	down
ENSG00000166579	NDEL1	150.872	-0.942649	0.230042	-4.09773	4.17227e-05	0.00185332	-0.840475	down
ENSG00000006744	ELAC2	625.811	-0.948138	0.169723	-5.58637	2.31863e-08	2.46089e-06	-0.889182	down
ENSG00000179409	GEMIN4	277.71	-0.954286	0.186912	-5.10554	3.29859e-07	2.72141e-05	-0.883345	down
ENSG00000272572		176.28	-0.955937	0.228644	-4.18089	2.90366e-05	0.00139554	-0.853338	down
ENSG00000064042	LIMCH1	937.796	-0.965181	0.149214	-6.46843	9.90278e-11	1.50596e-08	-0.918177	down
ENSG00000074755	ZZEF1	123.708	-0.965317	0.290531	-3.32259	0.000891857	0.0231821	-0.808408	down
ENSG00000167721	TSR1	465.546	-0.967192	0.159975	-6.04589	1.48587e-09	1.93879e-07	-0.913429	down
ENSG00000101638	ST8SIA5	110.603	-0.969826	0.252877	-3.83516	0.000125481	0.00470047	-0.845565	down
ENSG00000169439	SDC2	484.978	-0.970389	0.207229	-4.68269	2.83136e-06	0.00018375	-0.883217	down
ENSG00000171861	MRM3	116.66	-0.972856	0.24742	-3.932	8.42424e-05	0.00333987	-0.852766	down
ENSG00000169992	NLGN2	151.006	-0.97393	0.29272	-3.32717	0.000877319	0.0229205	-0.813367	down
ENSG00000172461	FUT9	84.9333	-0.9759	0.283289	-3.44489	0.000571288	0.0164199	-0.824013	down
ENSG00000119915	ELOVL3	86.32	-0.976451	0.308021	-3.17008	0.00152395	0.0348152	-0.801233	down
ENSG00000205544	TMEM256	285.135	-0.979331	0.239381	-4.0911	4.2933e-05	0.0018937	-0.865404	down
ENSG00000034152	MAP2K3	224.728	-0.985518	0.298033	-3.30675	0.000943867	0.0242243	-0.818421	down
ENSG00000153976	HS3ST3A1	209.339	-0.988803	0.200092	-4.94175	7.74249e-07	5.77936e-05	-0.905425	down
ENSG00000107957	SH3PXD2A	109.181	-0.990146	0.266279	-3.71845	0.000200447	0.00706698	-0.8512	down
ENSG00000143842	SOX13	167.218	-0.992321	0.256333	-3.87122	0.000108291	0.00416368	-0.86226	down
ENSG00000167703	SLC43A2	237.487	-0.997167	0.202989	-4.91243	8.99568e-07	6.59403e-05	-0.910769	down
ENSG00000143870	PDIA6	513.703	-0.998205	0.219476	-4.54812	5.41262e-06	0.000334237	-0.898638	down
ENSG00000091986	CCDC80	368.766	-1.0017	0.322536	-3.1057	0.00189826	0.0409342	-0.807884	down
ENSG00000198155	ZNF876P	67.2729	-1.00305	0.320836	-3.12636	0.00176984	0.0386972	-0.81087	down
ENSG00000106829	TLE4	354.945	-1.00354	0.194782	-5.15209	2.57605e-07	2.15143e-05	-0.923041	down
ENSG00000108559	NUP88	132.362	-1.00576	0.255842	-3.93119	8.45277e-05	0.00334467	-0.874199	down
ENSG00000109929	SC5D	495.063	-1.01073	0.200595	-5.03869	4.68723e-07	3.70218e-05	-0.925164	down
ENSG00000279799		63.6457	-1.02069	0.338386	-3.01636	0.00255827	0.0496027	-0.808043	down
ENSG00000100867	DHRS2	791.312	-1.02338	0.197018	-5.19436	2.05427e-07	1.78136e-05	-0.939542	down
ENSG00000159167	STC1	119.418	-1.02394	0.256522	-3.99163	6.56199e-05	0.00269597	-0.88931	down
ENSG00000120278	PLEKHG1	152.262	-1.03443	0.239507	-4.31901	1.56734e-05	0.000806545	-0.914018	down
ENSG00000273759		87.0605	-1.03507	0.279076	-3.70891	0.000208156	0.00731344	-0.877856	down
ENSG00000210164	MT-TG	197.513	-1.03736	0.27699	-3.74512	0.000180304	0.00648014	-0.88143	down
ENSG00000161509	GRIN2C	72.737	-1.04498	0.312405	-3.34496	0.000822939	0.021779	-0.853233	down
ENSG00000161653	NAGS	57.8555	-1.05529	0.347253	-3.03896	0.00237396	0.0474745	-0.826176	down
ENSG00000141510	TP53	375.568	-1.05534	0.257257	-4.10229	4.0909e-05	0.00183622	-0.91591	down
ENSG00000177106	EPS8L2	144.973	-1.05638	0.263243	-4.01295	5.99645e-05	0.00249379	-0.91093	down
ENSG00000179029	TMEM107	330.545	-1.0564	0.18968	-5.56939	2.55627e-08	2.6309e-06	-0.975613	down
ENSG00000244119	PDCL3P4	92.4471	-1.06163	0.31532	-3.36683	0.000760388	0.0205234	-0.864018	down
ENSG00000038427	VCAN	597.313	-1.06171	0.158847	-6.68384	2.32766e-11	3.98597e-09	-1.00349	down
ENSG00000107807	TLX1	180.62	-1.06496	0.298306	-3.57001	0.000356973	0.0112956	-0.884281	down
ENSG00000054983	GALC	152.716	-1.06671	0.244647	-4.36022	1.29933e-05	0.000696783	-0.937594	down
ENSG00000187498	COL4A1	75.3856	-1.06848	0.296471	-3.60399	0.000313375	0.0101448	-0.889014	down
ENSG00000100505	TRIM9	106.554	-1.06915	0.289248	-3.69632	0.000218751	0.00763305	-0.896879	down
ENSG00000229015		132.659	-1.07111	0.24089	-4.44645	8.72991e-06	0.000501121	-0.945054	down
ENSG00000184489	PTP4A3	165.27	-1.0857	0.244784	-4.43536	9.19206e-06	0.000517447	-0.954055	down
ENSG00000166963	MAP1A	65.6291	-1.08666	0.329727	-3.29564	0.000981968	0.0249508	-0.869459	down
ENSG00000167549	CORO6	95.1669	-1.08959	0.328676	-3.31511	0.000916079	0.0236902	-0.872676	down
ENSG00000149115	TNKS1BP1	359.65	-1.09678	0.16893	-6.49254	8.44019e-11	1.31293e-08	-1.02921	down
ENSG00000108061	SHOC2	300.696	-1.10701	0.231632	-4.77919	1.76003e-06	0.00012076	-0.985406	down
ENSG00000188112	C6orf132	64.6735	-1.1082	0.324178	-3.4185	0.000629672	0.0178463	-0.892366	down
ENSG00000166839	ANKDD1A	72.5886	-1.10897	0.355842	-3.11646	0.00183039	0.0398413	-0.85903	down
ENSG00000116014	KISS1R	393.331	-1.10984	0.206833	-5.36588	8.05556e-08	7.59982e-06	-1.01032	down
ENSG00000160097	FNDC5	100.97	-1.11761	0.304317	-3.67253	0.000240163	0.00820435	-0.921043	down
ENSG00000103485	QPRT	86.0461	-1.12531	0.346601	-3.24671	0.00116748	0.0285605	-0.881992	down
ENSG00000110092	CCND1	159.923	-1.13547	0.230877	-4.91809	8.73943e-07	6.42932e-05	-1.01164	down
ENSG00000119986	AVPI1	112.691	-1.13773	0.290761	-3.91293	9.11842e-05	0.00357337	-0.952262	down
ENSG00000160991	ORAI2	106.211	-1.13877	0.286422	-3.97585	7.01278e-05	0.00285813	-0.958113	down
ENSG00000164818	DNAAF5	328.12	-1.14025	0.289212	-3.94262	8.05979e-05	0.00321414	-0.956303	down
ENSG00000072134	EPN2	86.6766	-1.14089	0.284096	-4.01586	5.92306e-05	0.00246831	-0.96219	down
ENSG00000238113	LINC01410	96.4591	-1.142	0.297307	-3.84113	0.000122468	0.00459606	-0.949399	down
ENSG00000290085		57.4251	-1.14739	0.360337	-3.18423	0.0014514	0.0334956	-0.883469	down
ENSG00000286835		92.2686	-1.15749	0.333342	-3.47238	0.000515875	0.0152355	-0.921286	down
ENSG00000198062	POTEH	69.9564	-1.16167	0.318465	-3.64774	0.00026456	0.00880914	-0.942079	down
ENSG00000080603	SRCAP	59.6086	-1.16322	0.383132	-3.03609	0.00239671	0.0476955	-0.868633	down
ENSG00000135547	HEY2	62.3491	-1.17045	0.343396	-3.40845	0.000653339	0.0184146	-0.920959	down
ENSG00000157992	KRTCAP3	303.646	-1.17067	0.192267	-6.08877	1.13784e-09	1.50565e-07	-1.07896	down
ENSG00000168890	TMEM150A	78.1801	-1.17138	0.381074	-3.07388	0.00211295	0.0442354	-0.878512	down
ENSG00000253641	LINC03022	55.1839	-1.17156	0.343777	-3.4079	0.000654638	0.0184257	-0.921273	down
ENSG00000212464	SNORA12	221.372	-1.1736	0.313641	-3.74186	0.000182665	0.00655343	-0.957237	down
ENSG00000205927	OLIG2	184.841	-1.17468	0.214598	-5.47385	4.40362e-08	4.42054e-06	-1.06214	down
ENSG00000100276	RASL10A	42.3144	-1.17916	0.390617	-3.01872	0.00253848	0.0494289	-0.872518	down
ENSG00000120885	CLU	1481.24	-1.19861	0.1469	-8.15936	3.36805e-16	1.08943e-13	-1.14191	down
ENSG00000174721	FGFBP3	152.643	-1.20208	0.247173	-4.86329	1.15451e-06	8.22612e-05	-1.05378	down
ENSG00000269609	C10orf95-AS1	374.494	-1.20611	0.173196	-6.96381	3.31185e-12	6.36687e-10	-1.12826	down
ENSG00000149257	SERPINH1	665.177	-1.21413	0.154409	-7.86306	3.74853e-15	1.10707e-12	-1.15102	down
ENSG00000128739	SNRPN	2947.33	-1.21827	0.184638	-6.59814	4.16359e-11	6.78766e-09	-1.12964	down
ENSG00000198920	KIAA0753	64.9223	-1.21996	0.319552	-3.81771	0.000134699	0.00502727	-0.988287	down
ENSG00000288993		41.221	-1.22365	0.399906	-3.05985	0.00221451	0.0455372	-0.894953	down
ENSG00000177602	HASPIN	79.7626	-1.22489	0.293212	-4.1775	2.94727e-05	0.00140655	-1.02273	down
ENSG00000132535	DLG4	78.6769	-1.22504	0.329141	-3.72192	0.000197712	0.00698263	-0.980067	down
ENSG00000159674	SPON2	53.772	-1.22913	0.363734	-3.37919	0.000726986	0.0199129	-0.942497	down
ENSG00000102290	PCDH11X	66.234	-1.2294	0.323096	-3.80505	0.000141773	0.0052149	-0.991293	down
ENSG00000165215	CLDN3	186.356	-1.24643	0.29091	-4.2846	1.83067e-05	0.000914346	-1.04319	down
ENSG00000130768	SMPDL3B	94.0029	-1.27934	0.295357	-4.33149	1.48103e-05	0.000767951	-1.06538	down
ENSG00000189184	PCDH18	192.643	-1.28485	0.275564	-4.66262	3.12215e-06	0.000201339	-1.09404	down
ENSG00000170421	KRT8	65.1167	-1.28666	0.351488	-3.6606	0.000251623	0.00847295	-1.00176	down
ENSG00000008516	MMP25	52.8862	-1.29792	0.407657	-3.18384	0.00145336	0.033503	-0.93938	down
ENSG00000272277		75.9478	-1.30019	0.302836	-4.29339	1.75967e-05	0.000885396	-1.07413	down
ENSG00000196172	ZNF681	58.0285	-1.3005	0.375741	-3.46117	0.000537838	0.0156572	-0.982577	down
ENSG00000188219	POTEE	88.166	-1.30103	0.2877	-4.5222	6.12013e-06	0.000373401	-1.09344	down
ENSG00000129244	ATP1B2	115.042	-1.30426	0.32673	-3.99186	6.55578e-05	0.00269597	-1.04768	down
ENSG00000143416	SELENBP1	34.0935	-1.32374	0.436649	-3.03159	0.0024327	0.0481247	-0.921232	down
ENSG00000196890	H2BU1	47.6601	-1.3309	0.43044	-3.09196	0.00198838	0.0421197	-0.933697	down
ENSG00000162755	KLHDC9	104.895	-1.33307	0.30619	-4.35374	1.33834e-05	0.000715817	-1.09647	down
ENSG00000054179	ENTPD2	199.262	-1.34339	0.267073	-5.03003	4.90399e-07	3.85844e-05	-1.15436	down
ENSG00000223572	CKMT1A	160.709	-1.34502	0.275378	-4.88426	1.03819e-06	7.50224e-05	-1.14505	down
ENSG00000288741		31.5948	-1.34682	0.445687	-3.02189	0.00251203	0.0491739	-0.925696	down
ENSG00000152661	GJA1	119.503	-1.35561	0.286785	-4.72694	2.2793e-06	0.000154825	-1.14022	down
ENSG00000118523	CCN2	107.932	-1.36088	0.282828	-4.81169	1.49658e-06	0.000104443	-1.14979	down
ENSG00000183186	C2CD4C	122.989	-1.36295	0.263967	-5.16335	2.42567e-07	2.05959e-05	-1.17441	down
ENSG00000176974	SHMT1	153.836	-1.37034	0.301224	-4.54925	5.3837e-06	0.000333462	-1.13397	down
ENSG00000128567	PODXL	706.392	-1.37568	0.259975	-5.29158	1.21267e-07	1.0983e-05	-1.19056	down
ENSG00000138207	RBP4	55.0211	-1.38314	0.396115	-3.49176	0.000479854	0.014359	-1.01727	down
ENSG00000288999		31.379	-1.39327	0.453788	-3.07031	0.00213838	0.0444653	-0.945469	down
ENSG00000111859	NEDD9	100.286	-1.39742	0.271078	-5.15504	2.53579e-07	2.13851e-05	-1.1956	down
ENSG00000162444	RBP7	185.781	-1.40078	0.216051	-6.48356	8.95822e-11	1.38296e-08	-1.265	down
ENSG00000106538	RARRES2	192.719	-1.41218	0.253072	-5.58013	2.40336e-08	2.53635e-06	-1.23079	down
ENSG00000188536	HBA2	53.3803	-1.42481	0.351483	-4.05371	5.04125e-05	0.0021719	-1.11025	down
ENSG00000282048		73.0115	-1.42536	0.33935	-4.20026	2.66614e-05	0.00129051	-1.1261	down
ENSG00000108474	PIGL	155.247	-1.43066	0.243058	-5.8861	3.95421e-09	4.85415e-07	-1.25989	down
ENSG00000210077	MT-TV	446.11	-1.43206	0.328001	-4.36603	1.26527e-05	0.000682106	-1.14711	down
ENSG00000105143	SLC1A6	38.0736	-1.44199	0.452721	-3.18517	0.0014467	0.0334911	-0.980434	down
ENSG00000175061	SNHG29	242.386	-1.44775	0.195567	-7.40284	1.333e-13	3.43846e-11	-1.33073	down
ENSG00000129219	PLD2	40.7349	-1.44972	0.432573	-3.35138	0.0008041	0.0215191	-1.01355	down
ENSG00000108947	EFNB3	104.776	-1.45587	0.348809	-4.17382	2.99532e-05	0.00142613	-1.13767	down
ENSG00000237289	CKMT1B	74.0219	-1.46437	0.38373	-3.81613	0.000135559	0.00504091	-1.09351	down
ENSG00000255794	RMST	95.7965	-1.466	0.400536	-3.6601	0.000252113	0.00847295	-1.07045	down
ENSG00000170412	GPRC5C	74.0732	-1.48785	0.334101	-4.45331	8.45576e-06	0.000486755	-1.18366	down
ENSG00000104722	NEFM	37.714	-1.48988	0.433943	-3.43335	0.000596176	0.017063	-1.04074	down
ENSG00000116774	OLFML3	1020.35	-1.49038	0.160421	-9.29038	1.53739e-20	6.96199e-18	-1.40709	down
ENSG00000174938	SEZ6L2	453.274	-1.49681	0.260221	-5.75205	8.81663e-09	1.02666e-06	-1.29473	down
ENSG00000128487	SPECC1	268.597	-1.50952	0.243126	-6.2088	5.33902e-10	7.25324e-08	-1.32888	down
ENSG00000167355	OR51B5	35.747	-1.51682	0.449286	-3.37607	0.000735303	0.0200589	-1.036	down
ENSG00000250959	GLUD1P3	39.6086	-1.52947	0.491889	-3.10939	0.00187477	0.0405132	-0.982266	down
ENSG00000258743	LINC02301	66.4867	-1.53065	0.334941	-4.56991	4.87941e-06	0.000304075	-1.21777	down
ENSG00000170074	FAM153A	47.5938	-1.53909	0.371134	-4.14701	3.36851e-05	0.0015672	-1.16973	down
ENSG00000142910	TINAGL1	44.4427	-1.54996	0.447186	-3.46603	0.000528214	0.0154433	-1.06142	down
ENSG00000102265	TIMP1	61.781	-1.57302	0.35478	-4.43379	9.25911e-06	0.000518367	-1.21985	down
ENSG00000289213		28.6701	-1.57979	0.511426	-3.08899	0.00200839	0.0423674	-0.987668	down
ENSG00000170549	IRX1	120.283	-1.59109	0.28056	-5.67113	1.41857e-08	1.60598e-06	-1.34742	down
ENSG00000108590	MED31	84.1497	-1.60004	0.338975	-4.72024	2.3557e-06	0.00015843	-1.26456	down
ENSG00000170222	ADPRM	46.4403	-1.60177	0.397348	-4.03115	5.5504e-05	0.00233208	-1.17586	down
ENSG00000177374	HIC1	26.3506	-1.61217	0.523253	-3.08106	0.00206268	0.0432887	-0.988307	down
ENSG00000156925	ZIC3	188.618	-1.623	0.220148	-7.3723	1.67708e-13	4.21921e-11	-1.46032	down
ENSG00000210140	MT-TC	122.205	-1.62513	0.302816	-5.36673	8.01781e-08	7.59939e-06	-1.34146	down
ENSG00000115138	POMC	35.9692	-1.63762	0.457992	-3.57565	0.000349356	0.0111063	-1.10474	down
ENSG00000256463	SALL3	29.0123	-1.64433	0.514042	-3.19882	0.00137992	0.0322476	-1.02275	down
ENSG00000139318	DUSP6	35.6082	-1.65395	0.433587	-3.81457	0.000136421	0.00506371	-1.15666	down
ENSG00000022556	NLRP2	36.8744	-1.65531	0.539034	-3.07088	0.0021343	0.0444257	-0.98711	down
ENSG00000159182	PRAC1	635.636	-1.66942	0.14779	-11.2959	1.37517e-29	1.00083e-26	-1.58957	down
ENSG00000132692	BCAN	44.0877	-1.67599	0.388437	-4.31471	1.59815e-05	0.000820328	-1.24561	down
ENSG00000134709	HOOK1	185.179	-1.69454	0.249203	-6.79982	1.04751e-11	1.85619e-09	-1.48286	down
ENSG00000205212	CCDC144NL	28.8398	-1.70706	0.528134	-3.23225	0.00122821	0.0295873	-1.03886	down
ENSG00000119888	EPCAM	63.1895	-1.70862	0.390874	-4.37129	1.23516e-05	0.000667641	-1.2649	down
ENSG00000130513	GDF15	25.198	-1.7126	0.529509	-3.23432	0.00121934	0.0295103	-1.04173	down
ENSG00000136859	ANGPTL2	60.065	-1.72849	0.349084	-4.95149	7.36464e-07	5.55839e-05	-1.35137	down
ENSG00000169174	PCSK9	95.2658	-1.75244	0.309361	-5.66472	1.47263e-08	1.65797e-06	-1.4362	down
ENSG00000064547	LPAR2	51.8076	-1.75276	0.363116	-4.827	1.38603e-06	9.70603e-05	-1.3455	down
ENSG00000284668	LINC02780	496.251	-1.77557	0.196597	-9.03153	1.69292e-19	7.18715e-17	-1.63037	down
ENSG00000214548	MEG3	62.1602	-1.77811	0.483781	-3.67545	0.000237431	0.00815022	-1.1505	down
ENSG00000077327	SPAG6	32.0776	-1.7961	0.535851	-3.35187	0.000802691	0.0215191	-1.08022	down
ENSG00000178919	FOXE1	43.1926	-1.82328	0.408006	-4.46876	7.86746e-06	0.000462026	-1.32005	down
ENSG00000112238	PRDM13	50.5001	-1.83009	0.390712	-4.68399	2.81341e-06	0.000183168	-1.35529	down
ENSG00000229051	LINC01788	40.4101	-1.83378	0.461726	-3.97159	7.13952e-05	0.00288669	-1.22945	down
ENSG00000132386	SERPINF1	114.264	-1.87009	0.342056	-5.4672	4.57211e-08	4.56718e-06	-1.47412	down
ENSG00000133169	BEX1	135.157	-1.88268	0.264822	-7.10922	1.16698e-12	2.50323e-10	-1.62183	down
ENSG00000203867	RBM20	173.273	-1.91135	0.258952	-7.38109	1.57002e-13	3.99924e-11	-1.65662	down
ENSG00000111846	GCNT2	26.4184	-1.91602	0.546899	-3.50343	0.000459303	0.0139074	-1.13759	down
ENSG00000171345	KRT19	56.5829	-1.92587	0.393195	-4.89799	9.68199e-07	7.06344e-05	-1.42078	down
ENSG00000280254		24.1221	-1.93535	0.554994	-3.48716	0.000488178	0.0145867	-1.13458	down
ENSG00000130203	APOE	80.8793	-1.94392	0.336694	-5.77357	7.76096e-09	9.08925e-07	-1.54154	down
ENSG00000224078	SNHG14	3568.94	-1.9685	0.136165	-14.4567	2.27519e-47	3.31171e-44	-1.88794	down
ENSG00000128564	VGF	34.8297	-1.97669	0.443729	-4.45472	8.4002e-06	0.000484927	-1.36321	down
ENSG00000130635	COL5A1	99.5316	-1.98997	0.306224	-6.49841	8.1175e-11	1.28705e-08	-1.63684	down
ENSG00000132205	EMILIN2	44.9487	-1.99502	0.460203	-4.33509	1.45703e-05	0.00076524	-1.34011	down
ENSG00000142871	CCN1	274.831	-1.99699	0.627079	-3.1846	0.00144956	0.0334911	-1.0318	down
ENSG00000113140	SPARC	61.0577	-1.99927	0.403329	-4.95691	7.16226e-07	5.42575e-05	-1.4564	down
ENSG00000106034	CPED1	30.8873	-2.01704	0.475992	-4.23756	2.25961e-05	0.00110688	-1.32794	down
ENSG00000170175	CHRNB1	37.6152	-2.0472	0.469038	-4.36467	1.27312e-05	0.000684528	-1.36267	down
ENSG00000129152	MYOD1	56.6183	-2.07842	0.3596	-5.77981	7.47841e-09	8.8741e-07	-1.60456	down
ENSG00000169432	SCN9A	23.6809	-2.10182	0.643398	-3.26675	0.0010879	0.0269813	-1.07307	down
ENSG00000148841	ITPRIP	17.5239	-2.11345	0.636491	-3.32047	0.000898645	0.0232985	-1.09949	down
ENSG00000214456	PLIN5	29.3931	-2.11812	0.48342	-4.38153	1.17847e-05	0.000642111	-1.3828	down
ENSG00000286707		19.3225	-2.12551	0.645748	-3.29155	0.000996377	0.0252332	-1.08715	down
ENSG00000175229	GAL3ST3	17.5147	-2.14709	0.614827	-3.49219	0.000479079	0.0143569	-1.15383	down
ENSG00000137868	STRA6	34.5551	-2.19503	0.475887	-4.6125	3.97855e-06	0.000251381	-1.44898	down
ENSG00000173110	HSPA6	13.007	-2.19838	0.721694	-3.04615	0.00231795	0.0469343	-1.00749	down
ENSG00000157349	DDX19B	108.799	-2.20051	0.275502	-7.98728	1.37949e-15	4.13401e-13	-1.87417	down
ENSG00000251381	LINC00958	93.9141	-2.23707	0.28833	-7.75872	8.57914e-15	2.42813e-12	-1.87968	down
ENSG00000101336	HCK	18.5584	-2.23946	0.66504	-3.3674	0.000758798	0.0205234	-1.11382	down
ENSG00000107954	NEURL1	71.5353	-2.26338	0.35428	-6.38868	1.67327e-10	2.43557e-08	-1.75738	down
ENSG00000173114	LRRN3	18.7615	-2.27179	0.608929	-3.7308	0.000190871	0.00679994	-1.2327	down
ENSG00000107742	SPOCK2	139.351	-2.27186	0.254417	-8.92965	4.27351e-19	1.77726e-16	-1.97881	down
ENSG00000174950	CD164L2	21.9526	-2.27825	0.587389	-3.8786	0.000105059	0.00405472	-1.27792	down
ENSG00000184697	CLDN6	205.185	-2.28608	0.310215	-7.36936	1.71454e-13	4.26085e-11	-1.86988	down
ENSG00000185559	DLK1	15.7298	-2.31824	0.674762	-3.43565	0.00059114	0.0169427	-1.14209	down
ENSG00000271425	NBPF10	29.9024	-2.31971	0.71807	-3.23049	0.00123579	0.0296969	-1.04164	down
ENSG00000069696	DRD4	41.3011	-2.33588	0.577543	-4.04451	5.24321e-05	0.00224939	-1.31642	down
ENSG00000260428	SCX	18.7963	-2.33889	0.631924	-3.70121	0.00021457	0.00751291	-1.22814	down
ENSG00000273108		20.3044	-2.34112	0.685528	-3.41506	0.000637673	0.0180479	-1.11633	down
ENSG00000229437	LINC00366	24.341	-2.34869	0.582415	-4.03267	5.51457e-05	0.00232663	-1.31884	down
ENSG00000059804	SLC2A3	73.9157	-2.35569	0.334842	-7.03521	1.98954e-12	3.9748e-10	-1.87536	down
ENSG00000197406	DIO3	13.3937	-2.35702	0.716999	-3.28734	0.00101138	0.0254464	-1.08983	down
ENSG00000182636	NDN	470.115	-2.37591	0.189924	-12.5098	6.59965e-36	7.0783e-33	-2.19382	down
ENSG00000169618	PROKR1	11.4199	-2.3868	0.778657	-3.06528	0.00217469	0.0448996	-1.0078	down
ENSG00000258457	AJUBA-DT	16.5498	-2.4021	0.684039	-3.51165	0.000445338	0.0135855	-1.16477	down
ENSG00000146047	H2BC1	29.1457	-2.40994	0.563069	-4.28002	1.86879e-05	0.000931106	-1.39269	down
ENSG00000205777	GAGE1	11.8781	-2.44061	0.801491	-3.04509	0.00232614	0.0470259	-0.990746	down
ENSG00000162849	KIF26B	12.9118	-2.44087	0.729372	-3.34654	0.000818273	0.0217238	-1.11148	down
ENSG00000121871	SLITRK3	13.6156	-2.45569	0.751323	-3.26849	0.00108124	0.0268891	-1.07933	down
ENSG00000146904	EPHA1	12.1647	-2.50088	0.780842	-3.2028	0.00136096	0.0319145	-1.05232	down
ENSG00000072657	TRHDE	15.1497	-2.51186	0.72856	-3.4477	0.000565372	0.0163189	-1.133	down
ENSG00000167434	CA4	35.3029	-2.53569	0.454971	-5.5733	2.49954e-08	2.61208e-06	-1.72873	down
ENSG00000275291	RNVU1-26	77.9359	-2.56303	0.361154	-7.09679	1.27688e-12	2.71045e-10	-1.97225	down
ENSG00000164125	GASK1B	167.513	-2.59375	0.241064	-10.7596	5.34028e-27	3.40076e-24	-2.28969	down
ENSG00000260302	LINC01882	21.3114	-2.6113	0.602537	-4.33383	1.46536e-05	0.00076764	-1.4373	down
ENSG00000128253	RFPL2	35.3817	-2.62761	0.515744	-5.09479	3.49124e-07	2.86873e-05	-1.63322	down
ENSG00000237575	PYY2	20.6512	-2.63543	0.758473	-3.47465	0.000511523	0.015173	-1.11456	down
ENSG00000166126	AMN	11.3936	-2.64849	0.821532	-3.22384	0.00126483	0.0301106	-1.04656	down
ENSG00000197461	PDGFA	15.4664	-2.65483	0.753887	-3.52153	0.000429072	0.0131483	-1.15845	down
ENSG00000179528	LBX2	12.9072	-2.65698	0.815414	-3.25844	0.00112028	0.0276717	-1.06014	down
ENSG00000268654	MIMT1	20.7839	-2.66255	0.690272	-3.85725	0.00011467	0.00437592	-1.27634	down
ENSG00000280623	PCAT14	55.0255	-2.68532	0.392541	-6.84086	7.8719e-12	1.43226e-09	-1.98987	down
ENSG00000049089	COL9A2	32.4169	-2.71662	0.509473	-5.33221	9.70227e-08	8.94628e-06	-1.71535	down
ENSG00000059915	PSD	17.9356	-2.739	0.681618	-4.01838	5.86007e-05	0.00245209	-1.33813	down
ENSG00000171847	FAM90A1	17.408	-2.74143	0.67812	-4.04268	5.28427e-05	0.0022575	-1.35427	down
ENSG00000239620	PRR20G	22.3374	-2.74483	0.607106	-4.52117	6.14981e-06	0.000374092	-1.4981	down
ENSG00000148798	INA	53.799	-2.76363	0.404956	-6.82452	8.82199e-12	1.57697e-09	-2.01484	down
ENSG00000125384	PTGER2	21.5922	-2.77158	0.832454	-3.32941	0.000870306	0.0227665	-1.03756	down
ENSG00000242498	ARPIN	102.255	-2.81926	0.310039	-9.09326	9.61159e-20	4.25793e-17	-2.31465	down
ENSG00000196361	ELAVL3	42.9362	-2.82249	0.538789	-5.23858	1.61821e-07	1.42137e-05	-1.68706	down
ENSG00000237512	UNC5B-AS1	17.7298	-2.82923	0.682666	-4.14438	3.40729e-05	0.00157843	-1.38409	down
ENSG00000274428	RNVU1-25	98.5937	-2.87521	0.346732	-8.29229	1.11087e-16	3.77289e-14	-2.25315	down
ENSG00000243073	PRAMEF4	11.3076	-2.87594	0.845257	-3.40244	0.000667867	0.0187721	-1.10876	down
ENSG00000204219	TCEA3	78.7742	-2.88636	0.336669	-8.5733	1.00561e-17	3.65935e-15	-2.29733	down
ENSG00000270601	PRAMEF5	54.7296	-2.90636	0.400879	-7.24995	4.16913e-13	9.54591e-11	-2.13626	down
ENSG00000267751	BSG-AS1	34.0763	-2.90658	0.519011	-5.60023	2.14062e-08	2.29587e-06	-1.8096	down
ENSG00000180543	TSPYL5	14.9025	-2.98237	0.743645	-4.01047	6.05979e-05	0.00250989	-1.34303	down
ENSG00000286257		43.2942	-2.98492	0.48275	-6.18315	6.28333e-10	8.47959e-08	-1.94982	down
ENSG00000073756	PTGS2	8.89025	-3.0379	1.00307	-3.02859	0.00245697	0.0483749	-0.937847	down
ENSG00000204832	ST8SIA6-AS1	24.0062	-3.04091	0.645721	-4.70933	2.48538e-06	0.000164621	-1.57112	down
ENSG00000117407	ARTN	26.3434	-3.0454	0.59085	-5.15427	2.54627e-07	2.13851e-05	-1.71209	down
ENSG00000241186	TDGF1	169.824	-3.0631	0.284477	-10.7674	4.9041e-27	3.22374e-24	-2.58508	down
ENSG00000131914	LIN28A	286.718	-3.07139	0.220198	-13.9483	3.22348e-44	4.1055e-41	-2.76379	down
ENSG00000169515	CCDC8	9.84819	-3.09856	0.912914	-3.39414	0.000688456	0.0191396	-1.09811	down
ENSG00000171872	KLF17	11.7719	-3.15142	0.87232	-3.61269	0.000303038	0.00986472	-1.175	down
ENSG00000133101	CCNA1	315.145	-3.15195	0.264764	-11.9048	1.11783e-32	9.90396e-30	-2.71533	down
ENSG00000249116	IRX4-AS1	9.88639	-3.17757	1.00095	-3.17455	0.00150071	0.0344	-0.976942	down
ENSG00000176887	SOX11	96.1628	-3.18091	0.335311	-9.48645	2.39042e-21	1.15981e-18	-2.53395	down
ENSG00000149418	ST14	9.94018	-3.1819	0.93658	-3.39736	0.000680401	0.0189934	-1.09433	down
ENSG00000240563	L1TD1	284.949	-3.25357	0.211596	-15.3763	2.35896e-53	4.8071e-50	-2.95203	down
ENSG00000265843	LINC01029	1220.82	-3.27053	0.146599	-22.3094	2.99384e-110	2.03362e-106	-3.11644	down
ENSG00000249910	TRIM51CP	13.0954	-3.28368	0.900566	-3.64624	0.000266104	0.0088461	-1.15607	down
ENSG00000228526	MIR34AHG	18.1764	-3.29626	0.701747	-4.69722	2.63729e-06	0.000173364	-1.59668	down
ENSG00000177791	MYOZ1	9.58413	-3.3164	1.09794	-3.02056	0.00252308	0.0492955	-0.871155	down
ENSG00000164241	C5orf63	57.8468	-3.31785	0.41229	-8.04737	8.45925e-16	2.65204e-13	-2.40654	down
ENSG00000175063	UBE2C	109.696	-3.33493	0.346855	-9.61475	6.92789e-22	3.44333e-19	-2.62152	down
ENSG00000074657	ZNF532	170	-3.40434	0.290798	-11.7069	1.1752e-31	8.86972e-29	-2.85405	down
ENSG00000213186	TRIM59	110.44	-3.46883	0.316512	-10.9595	5.97974e-28	4.2019e-25	-2.83127	down
ENSG00000136014	USP44	24.1368	-3.49299	0.632822	-5.51971	3.39556e-08	3.44253e-06	-1.88502	down
ENSG00000172969	FRG2C	8.38363	-3.5312	1.08405	-3.25743	0.00112427	0.0277365	-1.00771	down
ENSG00000182053	TRIM49B	271.613	-3.58759	0.233875	-15.3398	4.14554e-53	7.6798e-50	-3.19078	down
ENSG00000196589	MBD3L2B	277.343	-3.60407	0.223402	-16.1327	1.50387e-58	3.40509e-55	-3.23638	down
ENSG00000120669	SOHLH2	192.841	-3.62057	0.259565	-13.9486	3.20707e-44	4.1055e-41	-3.1429	down
ENSG00000163497	FEV	28.2575	-3.63341	0.628943	-5.77701	7.60396e-09	8.95685e-07	-1.9639	down
ENSG00000233802	TRIM49D2	6.78018	-3.64321	1.20246	-3.0298	0.00244717	0.0482286	-0.911372	down
ENSG00000184343	SRPK3	25.2137	-3.6757	0.626895	-5.86333	4.53667e-09	5.53583e-07	-2.01936	down
ENSG00000283755	CPHXL	21.1437	-3.68137	0.723677	-5.08703	3.63717e-07	2.95292e-05	-1.73229	down
ENSG00000100558	PLEK2	9.5982	-3.69593	1.08684	-3.40061	0.000672347	0.0188517	-1.03487	down
ENSG00000171160	MORN4	43.2011	-3.75327	0.513929	-7.30309	2.8124e-13	6.66408e-11	-2.39506	down
ENSG00000223417	TRIM49D1	7.17495	-3.7648	1.20106	-3.13456	0.00172112	0.0378517	-0.952261	down
ENSG00000180532	ZSCAN4	21.7809	-3.77193	0.693809	-5.43656	5.43202e-08	5.31914e-06	-1.89037	down
ENSG00000169933	FRMPD4	7.57913	-3.77242	1.21228	-3.11184	0.00185922	0.0403056	-0.913291	down
ENSG00000124900	TRIM51	12.3186	-3.80006	0.939705	-4.04388	5.25729e-05	0.0022507	-1.34391	down
ENSG00000253377		14.1218	-3.81202	0.9432	-4.04159	5.30908e-05	0.00226062	-1.30657	down
ENSG00000204505	PRAMEF9	23.2756	-3.89449	0.956713	-4.0707	4.68721e-05	0.00203225	-1.1924	down
ENSG00000261239	ANKRD26P1	64.302	-3.90886	0.438433	-8.91553	4.85503e-19	1.97872e-16	-2.76238	down
ENSG00000164853	UNCX	63.8273	-3.95099	0.452636	-8.72885	2.57277e-18	9.89204e-16	-2.73498	down
ENSG00000157765	SLC34A2	29.3136	-3.95358	0.655128	-6.03482	1.59138e-09	2.02682e-07	-2.08068	down
ENSG00000204480	PRAMEF19	7.87524	-3.96845	1.27036	-3.12388	0.00178482	0.038983	-0.896804	down
ENSG00000201699	RNVU1-24	7.91645	-3.97249	1.22942	-3.23119	0.00123277	0.0296592	-0.967242	down
ENSG00000230522	MBD3L2	176.558	-3.98849	0.288412	-13.8291	1.70111e-43	2.03914e-40	-3.36239	down
ENSG00000257434		8.52421	-3.99703	1.13244	-3.52957	0.00041623	0.0128126	-1.13945	down
ENSG00000225581	TRIM53AP	19.8065	-4.00997	0.767287	-5.22617	1.73058e-07	1.51356e-05	-1.83093	down
ENSG00000256980	KHDC1L	156.223	-4.0108	0.374301	-10.7154	8.61494e-27	5.16339e-24	-3.03513	down
ENSG00000144015	TRIM43	185.033	-4.04768	0.294513	-13.7436	5.56335e-43	6.29833e-40	-3.39217	down
ENSG00000204481	PRAMEF14	23.021	-4.0601	0.727705	-5.57932	2.41462e-08	2.53635e-06	-1.95837	down
ENSG00000250584	LINC01511	11.88	-4.08272	0.978911	-4.17068	3.03698e-05	0.0014426	-1.42829	down
ENSG00000273155		6.21836	-4.14042	1.37301	-3.01559	0.00256483	0.0496826	-0.893159	down
ENSG00000165152	PGAP4	6.27393	-4.15183	1.34436	-3.08834	0.00201275	0.0424103	-0.946893	down
ENSG00000128250	RFPL1	21.5145	-4.15338	0.76904	-5.40073	6.63704e-08	6.34975e-06	-1.89812	down
ENSG00000144188	TRIM43CP	20.7753	-4.15766	0.836893	-4.96797	6.76581e-07	5.19687e-05	-1.68299	down
ENSG00000289168		6.25244	-4.15988	1.35443	-3.07132	0.00213113	0.0444102	-0.93537	down
ENSG00000229292	RFPL4AL1	9.1292	-4.17821	1.17181	-3.5656	0.000363031	0.011414	-1.13054	down
ENSG00000267627		6.45842	-4.1958	1.38127	-3.03764	0.00238437	0.0475892	-0.889865	down
ENSG00000168930	TRIM49	6.4014	-4.19698	1.37775	-3.04626	0.00231707	0.0469343	-0.901643	down
ENSG00000248429	GASK1B-AS1	35.7445	-4.20081	0.599898	-7.00254	2.51359e-12	4.87828e-10	-2.42553	down
ENSG00000186891	TNFRSF18	17.3775	-4.27608	0.84667	-5.05047	4.40731e-07	3.49464e-05	-1.79818	down
ENSG00000151338	MIPOL1	39.0558	-4.27778	0.621928	-6.87826	6.05873e-12	1.1123e-09	-2.35106	down
ENSG00000254319	LINC03021	7.09163	-4.33717	1.32103	-3.28317	0.00102645	0.02576	-1.03646	down
ENSG00000113430	IRX4	32.9072	-4.35532	0.642831	-6.77522	1.24219e-11	2.18218e-09	-2.38828	down
ENSG00000264334		41.6891	-4.37979	0.621588	-7.04613	1.83964e-12	3.78668e-10	-2.4101	down
ENSG00000157227	MMP14	11.4564	-4.40088	1.06367	-4.13747	3.51163e-05	0.00161171	-1.42253	down
ENSG00000150244	TRIM48	188.087	-4.45116	0.291591	-15.2651	1.30671e-52	2.219e-49	-3.7547	down
ENSG00000163286	ALPG	283.947	-4.45244	0.258369	-17.2329	1.50515e-66	3.834e-63	-3.87315	down
ENSG00000276368	H2AC14	7.97943	-4.4804	1.35184	-3.31431	0.000918703	0.0237279	-0.986709	down
ENSG00000232423	PRAMEF6	48.0378	-4.49346	0.558568	-8.04462	8.65168e-16	2.67127e-13	-2.75687	down
ENSG00000116726	PRAMEF12	194.511	-4.51259	0.299845	-15.0497	3.46546e-51	5.43225e-48	-3.7724	down
ENSG00000254764	TRIM53CP	109.053	-4.55106	0.38839	-11.7177	1.03399e-31	8.10408e-29	-3.45529	down
ENSG00000213921	LEUTX	22.2636	-4.67053	0.820736	-5.69066	1.26548e-08	1.44876e-06	-2.09464	down
ENSG00000258376	PAPLN-AS1	8.79645	-4.67178	1.26752	-3.68575	0.000228026	0.00789503	-1.26122	down
ENSG00000255363	LINC02757	13.7065	-4.67495	1.03808	-4.50346	6.68563e-06	0.000404272	-1.60447	down
ENSG00000219061	TRIM51FP	4.97264	-4.73286	1.55125	-3.051	0.0022808	0.0465713	-0.808056	down
ENSG00000269466	H3Y1	528.359	-4.75199	0.206984	-22.9582	1.21901e-116	2.4841e-112	-4.33534	down
ENSG00000148704	VAX1	5.12662	-4.76947	1.55553	-3.06613	0.0021685	0.0448996	-0.797797	down
ENSG00000256779	SRSF8BP	14.066	-4.77371	1.03508	-4.61191	3.9898e-06	0.000251381	-1.69573	down
ENSG00000037042	TUBG2	9.79813	-4.7843	1.26543	-3.78076	0.000156348	0.00570978	-1.26411	down
ENSG00000116721	PRAMEF1	82.7907	-4.78498	0.478484	-10.0003	1.51946e-23	7.93939e-21	-3.24743	down
ENSG00000196593	ANKRD20A19P	312.993	-4.78815	0.27761	-17.2478	1.16292e-66	3.38541e-63	-4.09038	down
ENSG00000258873	DUXA	5.4887	-4.86987	1.52106	-3.20162	0.00136656	0.032009	-0.870463	down
ENSG00000205044		29.6388	-4.89495	0.784724	-6.2378	4.43781e-10	6.11038e-08	-2.28295	down
ENSG00000126803	HSPA2	84.4755	-4.9208	0.458382	-10.7351	6.96141e-27	4.29878e-24	-3.48051	down
ENSG00000288016		16.4115	-4.95019	1.00262	-4.93727	7.92226e-07	5.88064e-05	-1.8547	down
ENSG00000268799	H3Y2	22.0849	-5.02873	0.895654	-5.61459	1.97031e-08	2.12439e-06	-2.13384	down
ENSG00000178928	TPRX1	51.237	-5.0337	0.589217	-8.54304	1.3074e-17	4.67408e-15	-3.08568	down
ENSG00000184302	SIX6	28.5142	-5.04432	0.776582	-6.49553	8.27397e-11	1.29698e-08	-2.50691	down
ENSG00000196092	PAX5	12.9951	-5.21981	1.20312	-4.33856	1.43422e-05	0.000755206	-1.623	down
ENSG00000144010	TRIM43B	25.4435	-5.25766	0.900652	-5.83761	5.29549e-09	6.42331e-07	-2.22863	down
ENSG00000279804	PRAMEF18	7.2116	-5.27642	1.48443	-3.55452	0.000378673	0.0118069	-1.01643	down
ENSG00000183206	POTEC	3.68176	-5.30419	1.68207	-3.15337	0.00161395	0.0362144	-0.653928	down
ENSG00000166007	TRIM51HP	4.18622	-5.48849	1.65062	-3.32512	0.000883817	0.0230312	-0.707094	down
ENSG00000102387	TAF7L	9.12597	-5.62882	1.39835	-4.02533	5.68957e-05	0.00238564	-1.33932	down
ENSG00000259783	LINC02259	24.8459	-5.63852	1.00127	-5.63135	1.78803e-08	1.95895e-06	-2.22496	down
ENSG00000128815	WDFY4	4.65693	-5.64263	1.59358	-3.54086	0.000398832	0.0123517	-0.799073	down
ENSG00000187569	DPPA3	9.58832	-5.70159	1.38517	-4.11616	3.85245e-05	0.00174413	-1.40417	down
ENSG00000204501	PRAMEF15	27.4605	-5.77792	0.971116	-5.94978	2.68506e-09	3.35682e-07	-2.46239	down
ENSG00000287530		76.5367	-5.80405	0.587706	-9.87577	5.30232e-23	2.70127e-20	-3.71113	down
ENSG00000163283	ALPP	11.1893	-5.92747	1.38013	-4.29487	1.74798e-05	0.000881693	-1.48445	down
ENSG00000133110	POSTN	11.9189	-6.01357	1.38798	-4.33261	1.47351e-05	0.000767895	-1.46461	down
ENSG00000284484	CPHXL2	12.9735	-6.13969	1.34656	-4.55952	5.12699e-06	0.00031853	-1.68338	down
ENSG00000124610	H1-1	13.1693	-6.16008	1.3358	-4.61155	3.99684e-06	0.000251381	-1.74025	down
ENSG00000205221	VIT	7.79391	-6.38702	1.49594	-4.26957	1.95849e-05	0.000968693	-1.08303	down
ENSG00000188707	ZBED10P	8.03049	-6.42872	1.43435	-4.48198	7.39523e-06	0.000439358	-1.25441	down
ENSG00000237247	MBD3L5	16.2403	-6.46987	1.32538	-4.88154	1.05262e-06	7.57963e-05	-1.91236	down
ENSG00000197213	ZSCAN5B	16.7638	-6.51443	1.31953	-4.93694	7.93589e-07	5.88064e-05	-1.95395	down
ENSG00000251360	KHDC1P1	10.0996	-6.75978	1.38515	-4.88016	1.06e-06	7.59128e-05	-1.49624	down
ENSG00000269564		22.0116	-6.90935	1.27846	-5.40442	6.50184e-08	6.24974e-06	-2.39119	down
ENSG00000281131	SCHLAP1	87.3194	-7.00266	0.77317	-9.05708	1.33989e-19	5.80942e-17	-4.08941	down
ENSG00000101460	MAP1LC3A	13.6937	-7.1983	1.36466	-5.27479	1.32908e-07	1.19313e-05	-1.69887	down
ENSG00000286284		15.7334	-7.39907	1.31755	-5.61576	1.95702e-08	2.12439e-06	-2.01407	down
ENSG00000205863	C1QTNF9B	20.5073	-7.78172	1.28757	-6.04372	1.50602e-09	1.94239e-07	-2.36118	down
ENSG00000127399	LRRC61	120.286	-9.37078	1.20699	-7.76376	8.24477e-15	2.40017e-12	-4.67698	down
