# Supplementary material for: The domesticated transposon protein L1TD1 associates with its ancestor L1 ORF1p to promote LINE-1 retrotransposition
Source: eLife. 2025 Mar 20;13:RP96850. doi: 10.7554/eLife.96850 (PMC11925450; doi:10.7554/eLife.96850)
Supplement: Supplementary file 6. [file elife-96850-supp6.xlsx]

## Sheet: Info
GEO GSE254460
Summary of differential gene expression analysis: The worksheet shows results obtained TETranscript analysis of HAP1 DNMT1 L1TD1 DKO versus HAP1 DNMT1 KO cells. RNA -seq experiment were performed using biological triplicates.
Column Name	Description
Gene ID	Ensembl gene id
Gene name	Gene name
basemean	average of normalize count values, dividing by size factors taken over all samples
logFC	Fold change (log2) over DNMT1 KO cells
lfcSE	Standard error estimate for the log2 fold change estimate
P value	p value
adj pvalue	adjusted p value
logfc shrunken	shrinkage estimation for dispersions and fold changes to improve stability and interpretability of estimates
Data analysis was explained in Materials and Methods section

## Sheet: TEtranscripts_out_sigdiff_gene_
	baseMean	log2FoldChange	lfcSE	stat	pvalue	padj
AluYh3	20.4695	3.17584	0.970606	3.27202	0.00106783	0.0496726
THE1-int:ERVL-MaLR:LTR	15.2761	2.31377	0.688115	3.36247	0.000772474	0.0460758
HERVH48-int:ERV1:LTR	92.5644	1.9451	0.516231	3.76787	0.000164643	0.0148069
LTR81C:Gypsy:LTR	47.346	1.37331	0.301029	4.56204	5.06599e-06	0.000759335
LTR7Y:ERV1:LTR	1948.59	1.29416	0.200483	6.4552	1.08074e-10	7.28959e-08
AluYf1:Alu:SINE	3889.14	1.14075	0.344889	3.30758	0.000941057	0.0473653
AluYb8:Alu:SINE	11411.2	1.08851	0.233341	4.66491	3.08755e-06	0.000666373
MLT2B3:ERVL:LTR	317.637	0.955885	0.202059	4.73073	2.23717e-06	0.000622508
LTR7:ERV1:LTR	2671.69	0.908449	0.253454	3.58427	0.000338019	0.0243771
Zaphod3:hAT-Tip100:DNA	213.771	0.855981	0.254921	3.35783	0.000785576	0.0460758
LTR78:ERV1:LTR	562.323	0.553823	0.167362	3.30912	0.00093589	0.0473653
MLT1F2:ERVL-MaLR:LTR	1017.6	0.438774	0.126116	3.47914	0.000503019	0.032313
MER92B:ERV1:LTR	380.567	-0.525732	0.157877	-3.33001	0.00086844	0.0473653
L1MEd	144.549	-0.608568	0.184107	-3.30552	0.000948008	0.0473653
MLT2A2:ERVL:LTR	509.765	-0.612062	0.161074	-3.79988	0.000144769	0.0148069
LTR12:ERV1:LTR	288.429	-0.731594	0.201994	-3.62186	0.000292495	0.0232103
HERV3-int:ERV1:LTR	70.2268	-0.790385	0.240452	-3.28708	0.00101232	0.0487724
Kanga1b:TcMar-Tc2:DNA	177.639	-0.800737	0.206742	-3.87313	0.000107447	0.0120788
LTR9C:ERV1:LTR	97.9521	-0.802645	0.226145	-3.54924	0.000386339	0.0260585
MER70A:ERVL:LTR	78.1052	-0.841814	0.235131	-3.58019	0.000343339	0.0243771
MER11A:ERVK:LTR	534.318	-0.862161	0.203524	-4.23616	2.27376e-05	0.00278845
MER52A:ERV1:LTR	194.856	-0.939651	0.202829	-4.63273	3.6088e-06	0.000666373
LTR6A:ERV1:LTR	691.964	-1.15155	0.173562	-6.63481	3.24912e-11	4.38306e-08
HERV9NC-int:ERV1:LTR	198.726	-1.1846	0.250737	-4.72446	2.3073e-06	0.000622508
LTR2	55.9186	-1.39196	0.280338	-4.96528	6.86004e-07	0.000308473
MER51D:ERV1:LTR	64.5775	-1.49822	0.32472	-4.6139	3.95181e-06	0.000666373
HERV15-int:ERV1:LTR	119.082	-1.5296	0.405573	-3.77145	0.0001623	0.0148069
(CATTC)n:Satellite:Satellite	29.9225	-2.38838	0.645409	-3.70056	0.000215125	0.0181377
(GAATG)n:Satellite:Satellite	11.8833	-3.24892	0.742945	-4.37303	1.22534e-05	0.00165299
