# Supplementary material for: The domesticated transposon protein L1TD1 associates with its ancestor L1 ORF1p to promote LINE-1 retrotransposition
Source: eLife. 2025 Mar 20;13:RP96850. doi: 10.7554/eLife.96850 (PMC11925450; doi:10.7554/eLife.96850)
Supplement: Supplementary file 7. [file elife-96850-supp7.xlsx]

## Sheet: Tabelle1
qRT-PCR
transcript	primer
hL1TD1 _f	CTTACCCTGGTAGCCGACCT
hL1TD1 _r	GGCTGGCAAATTTTCTAAGG
hARMC1_f	AGCTCTGGAGCGAATTTAAGA
hARMC1_r	GGCAGACATCCCTGATCCTG
hYY2_f	TCCCGGATAGCATTGAAGAC
hYY2_r	TTGACCTGCATTTGCTTCTG
hORF1p_f	AGTGCTTAAAGGAGCTGATGG
hORF1p_r	AACTGGAAGAAAGGGTATCAGC
hGAPDH_f	TCTTCTTTTGCGTCGCCAG
hGAPDH_r	AGCCCCAGCCTTCTCCA
Methylight
gene	Methylight primer / probe
hL1TD1 _f primer	AGGGGAGGAGTTAGTTTTAGAGATC
hL1TD1 _r primer	CGAACCAACCTTACCTAACGA
hL1TD1 probe	6-FAM-GTTCGTTTTTTAGTCGTTTAGGCGG-BHQ1
hLINE-1 _f primer	GTGGGATATAGTTTCGTGGTGCGCGTTT
hLINE-1 _r primer	AAAAAAAAATAACGAACGCACCTAAA
hLINE-1 probe	6FAM-TTGAAAAGCGTAATATTCGGGTGGGAGTGATT-BHQ1
hAlu1 _f primer	GGTTAGGTATAGTGGTTTATATTTGTAATTTTAGTA
hAlu1 _r primer	ATTAACTAAACTAATCTTAAACTCCTAACCTCA
hAlu probe	6FAM-CCTACCTTAACCTCCC-MGBb
