# Supplementary material for: The domesticated transposon protein L1TD1 associates with its ancestor L1 ORF1p to promote LINE-1 retrotransposition
Source: eLife. 2025 Mar 20;13:RP96850. doi: 10.7554/eLife.96850 (PMC11925450; doi:10.7554/eLife.96850)
Supplement: Supplementary file 8. [file elife-96850-supp8.xlsx]

## Sheet: primary antibodies
Primary Antibodies
L1TD1	polyclonal rabbit	Sigma-Aldrich	HPA028501
L1TD1	monoclonal mouse	R&D systems	MAB8317
LINE-1 ORF1p	monoclonal mouse	Sigma-Aldrich	MABC1152
LAMIN	polyclonal goat	Santa Cruz	sc-6216
Vinculin	monoclonal rabbit	Cell signaling	13901
beta-actin	monoclonal mouse	Abcam	ab8226
DNMT1	polyclonal rabbit	Santa Cruz	sc20701
gamma-H2AX	monoclonal mouse	Millipore	JBW301
cleaved caspase 3	polyclonal rabbit	Cell Signaling	9661

## Sheet: secondary antibodies
Goat anti-Rabbit IgG (H+L) Alexa Fluor™ Plus 488	Invitrogen	A32731
Goat anti-Mouse IgG (H+L) Alexa Fluor™ Plus 546	Invitrogen	A11030
Anti-mouse HRP (polyclonal)	Jackson Laboratories	124594
Anti-rabbit HRP (polyclonal)	Jackson Laboratories	129411
